# Supplementary material for: Bioinformatics analysis of oxidative stress genes in the pathogenesis of ulcerative colitis based on a competing endogenous RNA regulatory network
Source: PeerJ. 2024 Aug 16;12:e17213. doi: 10.7717/peerj.17213 (PMC11332386; doi:10.7717/peerj.17213)
Supplement: Supplemental Information 6 [file peerj-12-17213-s006.xlsx]

## Sheet: Table of contents
Supplementary Table S2-the clinical information of UC patients from GEO database
A the clinical information of lncRNA and mRNA from UC patients in GSE75214
B the clinical information of miRNA from UC patients in GSE48959
C the clinical information of mRNA from UC patients in GSE48959
D the clinical information of mRNA from UC patients in GSE114603

## Sheet: A
sampleid	sampleID	group	group1
control_colon_76	GSM1426079	control	normal
control_colon_77	GSM1426080	control	normal
control_colon_78	GSM1426081	control	normal
control_colon_79	GSM1426082	control	normal
control_colon_80	GSM1426083	control	normal
control_colon_81	GSM1426084	control	normal
control_colon_82	GSM1426085	control	normal
control_colon_83	GSM1426086	control	normal
control_colon_84	GSM1426087	control	normal
control_colon_85	GSM1426088	control	normal
control_colon_86	GSM1426089	control	normal
UC_colon_active_105	GSM1426090	ulcerative_colitis	active
UC_colon_active_106	GSM1426091	ulcerative_colitis	active
UC_colon_active_107	GSM1426092	ulcerative_colitis	active
UC_colon_active_108	GSM1426093	ulcerative_colitis	active
UC_colon_active_109	GSM1426094	ulcerative_colitis	active
UC_colon_active_110	GSM1426095	ulcerative_colitis	active
UC_colon_active_111	GSM1426096	ulcerative_colitis	active
UC_colon_active_112	GSM1426097	ulcerative_colitis	active
UC_colon_active_113	GSM1426098	ulcerative_colitis	active
UC_colon_active_114	GSM1426099	ulcerative_colitis	active
UC_colon_active_115	GSM1426100	ulcerative_colitis	active
UC_colon_active_116	GSM1426101	ulcerative_colitis	active
UC_colon_active_117	GSM1426102	ulcerative_colitis	active
UC_colon_active_118	GSM1426103	ulcerative_colitis	active
UC_colon_active_119	GSM1426104	ulcerative_colitis	active
UC_colon_active_120	GSM1426105	ulcerative_colitis	active
UC_colon_active_121	GSM1426106	ulcerative_colitis	active
UC_colon_active_122	GSM1426107	ulcerative_colitis	active
UC_colon_active_123	GSM1426108	ulcerative_colitis	active
UC_colon_active_124	GSM1426109	ulcerative_colitis	active
UC_colon_active_125	GSM1426110	ulcerative_colitis	active
UC_colon_active_126	GSM1426111	ulcerative_colitis	active
UC_colon_active_127	GSM1426112	ulcerative_colitis	active
UC_colon_active_128	GSM1426113	ulcerative_colitis	active
UC_colon_active_129	GSM1426114	ulcerative_colitis	active
UC_colon_active_130	GSM1426115	ulcerative_colitis	active
UC_colon_active_131	GSM1426116	ulcerative_colitis	active
UC_colon_active_132	GSM1426117	ulcerative_colitis	active
UC_colon_active_133	GSM1426118	ulcerative_colitis	active
UC_colon_active_134	GSM1426119	ulcerative_colitis	active
UC_colon_active_135	GSM1426120	ulcerative_colitis	active
UC_colon_active_136	GSM1426121	ulcerative_colitis	active
UC_colon_active_137	GSM1426122	ulcerative_colitis	active
UC_colon_active_138	GSM1426123	ulcerative_colitis	active
UC_colon_active_139	GSM1426124	ulcerative_colitis	active
UC_colon_active_140	GSM1426125	ulcerative_colitis	active
UC_colon_active_141	GSM1426126	ulcerative_colitis	active
UC_colon_active_142	GSM1426127	ulcerative_colitis	active
UC_colon_active_143	GSM1426128	ulcerative_colitis	active
UC_colon_active_144	GSM1426129	ulcerative_colitis	active
UC_colon_active_145	GSM1426130	ulcerative_colitis	active
UC_colon_active_146	GSM1426131	ulcerative_colitis	active
UC_colon_active_147	GSM1426132	ulcerative_colitis	active
UC_colon_active_148	GSM1426133	ulcerative_colitis	active
UC_colon_active_149	GSM1426134	ulcerative_colitis	active
UC_colon_active_150	GSM1426135	ulcerative_colitis	active
UC_colon_active_151	GSM1426136	ulcerative_colitis	active
UC_colon_active_152	GSM1426137	ulcerative_colitis	active
UC_colon_active_153	GSM1426138	ulcerative_colitis	active
UC_colon_active_154	GSM1426139	ulcerative_colitis	active
UC_colon_active_155	GSM1426140	ulcerative_colitis	active
UC_colon_active_156	GSM1426141	ulcerative_colitis	active
UC_colon_active_157	GSM1426142	ulcerative_colitis	active
UC_colon_active_158	GSM1426143	ulcerative_colitis	active
UC_colon_active_159	GSM1426144	ulcerative_colitis	active
UC_colon_active_160	GSM1426145	ulcerative_colitis	active
UC_colon_active_161	GSM1426146	ulcerative_colitis	active
UC_colon_active_162	GSM1426147	ulcerative_colitis	active
UC_colon_active_163	GSM1426148	ulcerative_colitis	active
UC_colon_active_164	GSM1426149	ulcerative_colitis	active
UC_colon_active_165	GSM1426150	ulcerative_colitis	active
UC_colon_active_166	GSM1426151	ulcerative_colitis	active
UC_colon_active_167	GSM1426152	ulcerative_colitis	active
UC_colon_active_168	GSM1426153	ulcerative_colitis	active
UC_colon_active_169	GSM1426154	ulcerative_colitis	active
UC_colon_active_170	GSM1426155	ulcerative_colitis	active
UC_colon_active_171	GSM1426156	ulcerative_colitis	active
UC_colon_active_172	GSM1426157	ulcerative_colitis	active
UC_colon_active_173	GSM1426158	ulcerative_colitis	active
UC_colon_active_174	GSM1426159	ulcerative_colitis	active
UC_colon_active_175	GSM1426160	ulcerative_colitis	active
UC_colon_active_176	GSM1426161	ulcerative_colitis	active
UC_colon_active_177	GSM1426162	ulcerative_colitis	active
UC_colon_active_178	GSM1426163	ulcerative_colitis	active
UC_colon_inactive_179	GSM1426164	ulcerative_colitis	inactive
UC_colon_inactive_180	GSM1426165	ulcerative_colitis	inactive
UC_colon_inactive_181	GSM1426166	ulcerative_colitis	inactive
UC_colon_inactive_182	GSM1426167	ulcerative_colitis	inactive
UC_colon_inactive_183	GSM1426168	ulcerative_colitis	inactive
UC_colon_inactive_184	GSM1426169	ulcerative_colitis	inactive
UC_colon_inactive_185	GSM1426170	ulcerative_colitis	inactive
UC_colon_inactive_186	GSM1426171	ulcerative_colitis	inactive
UC_colon_inactive_187	GSM1426172	ulcerative_colitis	inactive
UC_colon_inactive_188	GSM1426173	ulcerative_colitis	inactive
UC_colon_inactive_189	GSM1426174	ulcerative_colitis	inactive
UC_colon_inactive_190	GSM1426175	ulcerative_colitis	inactive
UC_colon_inactive_191	GSM1426176	ulcerative_colitis	inactive
UC_colon_inactive_192	GSM1426177	ulcerative_colitis	inactive
UC_colon_inactive_193	GSM1426178	ulcerative_colitis	inactive
UC_colon_inactive_194	GSM1426179	ulcerative_colitis	inactive
UC_colon_inactive_195	GSM1426180	ulcerative_colitis	inactive
UC_colon_inactive_196	GSM1426181	ulcerative_colitis	inactive
UC_colon_inactive_197	GSM1426182	ulcerative_colitis	inactive
UC_colon_inactive_198	GSM1426183	ulcerative_colitis	inactive
UC_colon_inactive_199	GSM1426184	ulcerative_colitis	inactive
UC_colon_inactive_200	GSM1426185	ulcerative_colitis	inactive
UC_colon_inactive_201	GSM1426186	ulcerative_colitis	inactive

## Sheet: B
sampleid	sampleID	group	disease_activity_
control_1	GSM1187575	control	not_applicable
control_2	GSM1187576	control	not_applicable
control_3	GSM1187577	control	not_applicable
control_4	GSM1187578	control	not_applicable
control_5	GSM1187579	control	not_applicable
control_6	GSM1187580	control	not_applicable
control_7	GSM1187581	control	not_applicable
control_8	GSM1187582	control	not_applicable
control_9	GSM1187583	control	not_applicable
control_10	GSM1187584	control	not_applicable
UC_active_1	GSM1187585	UC	active
UC_active_2	GSM1187586	UC	active
UC_active_3	GSM1187587	UC	active
UC_active_4	GSM1187588	UC	active
UC_active_5	GSM1187589	UC	active
UC_active_6	GSM1187590	UC	active
UC_active_7	GSM1187591	UC	active
UC_active_8	GSM1187592	UC	active
UC_active_9	GSM1187593	UC	active
UC_active_10	GSM1187594	UC	active
UC_inactive_1	GSM1187595	UC	inactive
UC_inactive_2	GSM1187596	UC	inactive
UC_inactive_3	GSM1187597	UC	inactive
UC_inactive_4	GSM1187598	UC	inactive
UC_inactive_5	GSM1187599	UC	inactive
UC_inactive_6	GSM1187600	UC	inactive
UC_inactive_7	GSM1187601	UC	inactive

## Sheet: C
sampleid	sampleID	group	disease_activity_
control_1	GSM1187602	control	not_applicable
control_2	GSM1187603	control	not_applicable
control_3	GSM1187604	control	not_applicable
control_4	GSM1187605	control	not_applicable
control_5	GSM1187606	control	not_applicable
control_7	GSM1187607	control	not_applicable
control_8	GSM1187608	control	not_applicable
control_10	GSM1187609	control	not_applicable
UC_active_1	GSM1187610	UC	active
UC_active_2	GSM1187611	UC	active
UC_active_3	GSM1187612	UC	active
UC_active_4	GSM1187613	UC	active
UC_active_6	GSM1187614	UC	active
UC_active_7	GSM1187615	UC	active
UC_active_9	GSM1187616	UC	active
UC_inactive_1	GSM1187617	UC	inactive
UC_inactive_2	GSM1187618	UC	inactive
UC_inactive_3	GSM1187619	UC	inactive
UC_inactive_4	GSM1187620	UC	inactive
UC_inactive_5	GSM1187621	UC	inactive
UC_inactive_6	GSM1187622	UC	inactive

## Sheet: D
sampleID	group1	group2	group3
GSM3143535	healthy_control	G1	control
GSM3143539	healthy_control	G1	control
GSM3143552	healthy_control	G1	control
GSM3143557	healthy_control	G1	control
GSM3143562	healthy_control	G1	control
GSM3143567	healthy_control	G1	control
GSM3143538	ulcerative_colitis	G2	responders_day0
GSM3143543	ulcerative_colitis	G2	responders_day0
GSM3143544	ulcerative_colitis	G2	responders_day0
GSM3143546	ulcerative_colitis	G2	responders_day0
GSM3143547	ulcerative_colitis	G2	responders_day0
GSM3143553	ulcerative_colitis	G2	responders_day0
GSM3143555	ulcerative_colitis	G2	responders_day0
GSM3143556	ulcerative_colitis	G2	responders_day0
GSM3143566	ulcerative_colitis	G2	responders_day0
GSM3143536	ulcerative_colitis	G3	non-responders_day0
GSM3143537	ulcerative_colitis	G3	non-responders_day0
GSM3143545	ulcerative_colitis	G3	non-responders_day0
GSM3143554	ulcerative_colitis	G3	non-responders_day0
GSM3143563	ulcerative_colitis	G3	non-responders_day0
GSM3143565	ulcerative_colitis	G3	non-responders_day0
