# Supplementary material for: Bioinformatics analysis of oxidative stress genes in the pathogenesis of ulcerative colitis based on a competing endogenous RNA regulatory network
Source: PeerJ. 2024 Aug 16;12:e17213. doi: 10.7717/peerj.17213 (PMC11332386; doi:10.7717/peerj.17213)
Supplement: Supplemental Information 7 [file peerj-12-17213-s007.xlsx]

## Sheet: Table of contents
Table S2-eigenvalues of two principal components in the GEO dataset.
A eigenvalues of two principal components in the GSE75214 (lncRNA) dataset.
B eigenvalues of two principal components in the GSE75214 (mRNA) dataset.
C eigenvalues of two principal components in the GSE48959 (miRNA) dataset.
D eigenvalues of two principal components in the GSE48959 (mRNA) dataset.

## Sheet: A
Samples	PC1	PC2	PC3	PC4	PC5	PC6	PC7	PC8	PC9	PC10	PC11	PC12	PC13	PC14	PC15	PC16	PC17	PC18	PC19	PC20	PC21	PC22	PC23	PC24	PC25	PC26	PC27	PC28	PC29	PC30	PC31	PC32	PC33	PC34	PC35	PC36	PC37	PC38	PC39	PC40	PC41	PC42	PC43	PC44	PC45	PC46	PC47	PC48	PC49
GSM1426079	-18.2223	-8.96806	2.63894	-1.4882	3.95039	4.39883	-0.335257	1.64571	-0.586938	0.348472	-1.77835	1.12249	-4.3243	-0.64757	1.98085	-1.80287	1.28901	-1.89235	1.28321	-2.01318	0.357561	-0.560256	2.00877	-1.37865	1.52752	-1.87344	1.40304	-0.051915	-0.147458	-0.730454	0.350544	1.37404	0.320744	-1.42785	1.06986	0.255407	-2.06662	-1.64057	3.17075	3.37876	1.52109	-3.73021	0.940535	4.36231	0.109811	1.53624	1.68745	-1.00607	-4.30866
GSM1426080	1.80258	-10.3551	5.33809	1.205	-0.636964	5.02076	-2.78188	2.98417	0.801407	2.39948	-0.56142	-4.05451	-2.59759	1.87367	4.19895	-1.24752	2.2099	-3.22452	3.19625	-0.053748	0.455209	-0.612694	-0.818167	-1.02785	3.82415	-2.73202	3.38644	-0.42942	2.81452	-1.20201	0.467191	-0.0361441	-0.216805	-1.17884	-1.08045	2.87358	1.28524	1.63442	-1.87468	0.662254	0.420498	0.0162845	1.0856	3.18935	-4.10679	1.47778	0.00187407	-1.03946	1.72647
GSM1426081	-19.8551	-8.77803	-6.08091	2.51456	4.63732	4.06102	2.77116	-8.70665	0.682255	1.44986	-8.0287	-2.18041	0.773068	0.23518	-3.28722	2.84731	-4.63788	-0.383725	1.15649	2.20011	-0.762871	1.11381	3.35618	0.331956	1.00401	4.14756	-1.18043	1.77477	-0.962861	-1.04455	-2.67707	-0.0345732	4.90255	-0.991642	0.753545	-2.65242	0.56645	-0.322547	-1.77261	-2.97452	-1.39415	-0.799803	0.919543	3.19338	0.868087	1.23798	-1.48285	-1.24001	-0.227561
GSM1426082	-7.38899	-14.6559	-1.30862	2.14821	5.30176	6.12283	3.50152	-2.70779	1.1257	1.06252	-1.87473	-3.17175	2.0192	-0.36605	0.532498	-0.604532	-0.416796	-3.25751	2.07433	0.140499	-1.17479	-1.1278	0.704591	0.444925	2.10758	-2.40597	0.975695	1.99555	3.97415	-0.923018	1.21735	-0.358371	-1.91284	2.85158	-0.434746	4.75297	-1.21738	2.23324	0.84648	1.14139	-3.71678	0.435858	2.25987	-4.1656	-2.42321	-1.48102	0.265755	1.32078	-1.12456
GSM1426083	-14.7998	-8.69574	-0.243712	-0.112813	5.49456	5.58658	1.91576	-3.78009	0.0315511	-0.688978	-6.22516	3.08076	0.951729	1.42597	1.45373	1.21988	1.37791	-2.06638	2.55516	-1.13191	-3.21162	-3.42705	-1.91355	0.588061	-0.0415607	1.001	1.71395	2.00911	-1.70142	0.654962	2.392	2.94958	-3.77227	1.72161	0.382375	-0.122011	1.02066	2.3185	-0.669621	0.178723	3.49544	-1.06634	2.00662	-0.604295	2.55781	0.410015	-0.799804	0.930994	2.55591
GSM1426084	-5.76891	-13.6316	5.99117	3.28234	4.7963	4.31637	3.18479	-8.92377	1.56337	1.67206	-1.61912	-1.52925	2.9531	1.54749	-3.68248	1.59373	-2.31199	-3.33177	3.22745	-2.90308	0.450927	1.10632	-0.0045856	-2.21832	0.0473177	-3.49468	-0.482968	-0.859816	-2.45385	-1.91463	-2.52287	-0.968432	-4.23243	-3.20997	1.76109	-1.43188	-1.32294	-0.22895	0.763376	1.39565	-2.96214	1.12293	-1.84497	-1.49479	0.616151	-1.65	-0.472991	-0.0509849	-1.23891
GSM1426085	-4.44524	-8.16188	8.2406	2.40922	-6.11817	5.82538	-1.58714	4.09403	2.34542	1.14604	-1.45916	-2.91547	-5.4554	1.06533	-1.96575	-0.566534	2.4062	-1.43075	-2.76503	1.74911	-1.18319	1.56634	-2.82426	-1.59923	-2.5351	0.619685	1.69437	2.5017	-0.0893811	-0.218034	-0.30032	-0.309318	-0.880229	1.17778	-4.31086	-1.02669	-3.62335	-2.84894	1.02742	0.124633	1.1242	1.81339	-2.20261	0.924771	-0.13885	-3.27465	0.371851	-1.36676	-0.602023
GSM1426086	-1.94138	-12.4999	5.41814	0.0231953	3.08666	7.5036	-1.82091	2.60173	2.02915	0.657614	-1.21408	-0.586553	2.56543	-1.82679	0.720203	0.903015	0.559003	-1.21086	-1.02574	1.82416	1.16266	-2.35922	-0.959863	-0.637668	-1.04105	0.221139	0.303381	1.28277	2.33725	2.4793	1.36639	1.38174	2.66593	-0.17448	-2.37738	-1.05847	-1.02087	-2.53097	-1.0179	-1.39439	0.740125	2.1549	0.110081	0.963056	1.95254	1.29306	0.604482	1.95945	-0.231146
GSM1426087	10.8752	-14.8023	10.1645	1.98999	-2.11558	10.7598	7.45509	-1.4177	2.02922	-1.99868	2.22762	-0.490155	5.54954	0.065184	-1.02821	-0.372227	-0.820744	5.13311	-6.43959	0.125496	-0.997506	1.9678	3.29659	-1.24649	-1.64167	2.5444	4.00495	0.926372	-1.50891	-0.605158	-3.88666	-4.43931	1.30005	3.79605	1.62131	1.18619	1.9995	-1.73342	0.400958	1.63266	3.05952	-0.650609	0.972563	-0.399027	-0.755091	-1.48872	0.735736	1.21051	0.518305
GSM1426088	-6.40262	-6.74785	2.19251	3.58133	-0.871009	9.7006	-1.14008	-3.80998	0.303195	-0.0335524	0.030544	0.117868	3.88568	-0.878161	0.316025	-3.11417	-1.1203	2.43775	-2.12018	-1.24465	2.6158	-0.524706	-4.94216	4.68039	-0.40338	0.582547	-4.59566	-6.37939	-3.85671	1.06854	2.13852	0.839362	1.64255	1.30426	-2.62891	0.897332	0.0387392	1.32116	1.33773	1.72861	-0.131691	-0.532827	1.46284	1.50433	-1.37592	-0.835416	-2.28713	-0.788253	-1.0219
GSM1426089	-1.74278	-11.6989	5.81187	0.677898	2.47529	7.28484	-0.249129	4.50361	5.65725	1.29725	-0.313425	1.66871	0.32711	-1.54113	0.336582	1.38771	1.58351	-0.559736	-1.32274	-0.985718	1.53104	-2.25222	-0.707058	1.23419	-2.53713	-1.13456	-0.813716	-0.894792	-0.0946171	0.208317	1.20277	1.22873	0.995309	-0.303786	0.344924	-2.24843	3.01774	-2.11883	-1.03037	0.880214	-0.536818	1.61078	0.25899	-4.27614	1.86121	2.88473	0.296994	-3.52704	0.26669
GSM1426090	-1.8397	3.36735	-1.23764	1.61157	5.01117	-1.79139	-0.810656	0.560321	1.68646	1.49194	2.90684	-2.2616	1.01441	1.91001	-2.45318	2.1737	1.30616	1.34732	-0.960631	-0.256786	0.774789	-1.58553	-0.924753	0.298368	-0.685773	0.562822	-0.202023	0.615453	0.183778	0.590822	0.280407	-1.41723	0.238543	-1.86392	2.66797	-0.705952	-0.669446	1.44291	-0.642446	-0.766543	-0.182397	-1.74511	1.08265	-0.942191	-1.57921	-0.0809272	0.979783	-1.71557	0.407068
GSM1426091	-16.7377	-1.26242	0.764489	0.627602	7.23378	-4.46506	-2.7119	4.12303	-0.912855	3.59963	0.826111	0.152814	3.01683	-0.010137	-0.349936	0.404276	0.200486	-0.216573	-0.0620479	2.92941	2.54031	-0.408224	0.782594	-0.359687	-3.32384	0.052742	-0.642439	1.78267	-0.213057	0.119808	-0.240475	0.192532	1.97819	-0.726968	-0.851503	0.11061	-1.74763	0.89232	-0.200632	0.125334	1.24018	0.803102	0.0813799	-1.39291	-0.649371	-0.0481892	0.274182	-0.712548	0.973593
GSM1426092	-18.1219	-3.02396	1.22298	1.14249	4.76475	-3.5824	-0.622811	1.81471	2.46927	6.1526	1.69853	3.08111	0.424618	-0.25826	-1.22659	1.6777	1.83009	-1.00347	-0.399387	0.960131	3.15828	0.555376	0.413003	-0.753294	-3.28797	0.774568	-1.14586	-0.402787	0.860708	-1.03207	1.44109	0.422409	1.95658	-1.59164	-0.115866	0.623619	0.42625	-0.739075	1.60353	2.25921	-0.170081	-0.810873	0.163088	-0.820945	1.07183	-2.09897	-3.57936	0.238599	0.642873
GSM1426093	1.10392	1.88528	-2.68099	1.58023	4.44069	-0.897254	-1.04256	2.90312	-1.27605	0.790867	-0.516569	1.4469	-0.467533	1.24736	-2.6813	2.9946	2.38108	-2.29836	0.129442	1.79316	-1.77106	0.232258	-1.72305	1.55411	-1.51965	-0.282497	0.430935	-0.821311	-0.467915	-0.944896	-2.03337	0.789681	2.45723	0.892514	-0.49848	-0.466118	-0.709396	1.19779	1.6059	0.461057	-1.78693	-0.12127	0.0681464	0.616296	0.0245014	0.727994	1.21772	1.61888	-0.44905
GSM1426094	-6.4367	19.9109	7.32305	-11.7198	2.10203	-0.0140713	0.553471	-0.924041	3.0839	-1.39548	0.167557	2.90472	0.768096	-1.29828	-3.01871	4.29414	1.90189	-0.701919	-2.21025	-1.84697	-0.47232	-0.444281	2.14965	3.05006	-1.2351	-3.22615	2.57513	-1.08284	2.7965	0.226275	-1.58364	0.856016	3.6564	-0.697519	-0.924532	2.04912	1.05181	-1.02817	-1.16397	0.221528	-2.38562	0.603351	2.44448	1.47971	0.540912	-0.120348	-1.43461	-1.09338	0.136619
GSM1426095	-6.80563	15.2284	0.310645	-9.85923	6.95297	4.20036	1.32719	-1.63953	-0.495771	-0.370756	1.4112	1.81518	-3.15363	-1.01242	1.56989	2.43267	1.39473	-0.64502	-0.882826	0.873983	-0.548618	0.629054	-2.15285	-0.947051	2.946	-0.992582	1.1034	-1.78828	-0.333478	-2.95069	0.49892	-2.98205	-0.022103	-0.0336172	-1.52565	-2.28461	2.21572	1.07667	-1.03128	-0.498924	0.68734	0.47809	-1.27574	1.56433	-0.530969	-0.75976	-1.12498	-2.43287	-0.258833
GSM1426096	-8.83237	9.26039	-7.50142	0.456303	5.6376	1.02862	4.77241	0.868867	4.09652	-0.785273	-1.59101	-1.98652	-2.6694	0.9017	4.39908	-5.78462	1.05193	0.51082	-0.305665	1.29416	2.26125	-1.7659	-2.19541	0.0270579	1.16925	4.41063	-1.18141	2.92829	2.98618	2.40605	-2.99074	-1.94068	1.5514	-0.0901598	2.36549	0.159631	-1.19639	-1.34689	3.14558	1.8564	-3.55787	0.307763	-2.07972	-0.347105	2.42154	0.170141	1.56709	-1.96569	0.963119
GSM1426097	8.07905	4.53045	5.91309	-1.12825	7.19829	-1.03466	5.31229	1.56032	-4.85183	3.74589	-0.852402	-1.91719	0.793692	-3.29291	3.04783	2.86801	-0.825224	1.60306	-1.13545	1.3868	2.46579	-0.451346	-0.222213	-0.910193	0.199011	-1.94079	-3.33913	0.367783	2.74014	0.254262	2.05497	-1.74549	-1.67355	0.20115	1.41703	-0.965246	-0.916931	1.25974	0.656786	0.968333	1.74822	1.70077	1.77783	2.60464	-1.15655	1.58488	1.75477	-1.2293	0.988481
GSM1426098	-19.5167	12.1711	-6.40776	3.36074	-4.70367	1.96895	3.20664	3.18739	2.9678	3.7648	1.8234	-1.24479	1.75631	-2.51852	-0.238366	1.94547	1.92379	-2.38708	-1.65774	-0.744222	-1.2542	-0.56045	-2.59831	1.75381	4.1329	-1.70106	-1.0319	2.60691	-0.928936	-0.579826	-5.11166	-0.863907	1.67931	-0.274677	1.47473	-0.712417	-1.95562	0.873467	-0.025405	2.79654	-1.78431	-0.794365	-1.04208	-2.70691	0.0569118	0.379102	0.410412	1.72775	-0.845654
GSM1426099	18.1429	1.72344	-4.65972	4.18362	3.89705	-1.20889	-1.60921	0.880724	2.78231	-1.71629	-0.265568	-4.13445	-2.40857	-1.45446	-0.343607	0.328108	0.966155	-3.6464	-1.1776	-0.265731	1.29213	-1.8151	-0.87228	2.08966	1.70112	0.332635	-0.228713	-0.690454	-1.31477	-0.0846091	-0.365833	-0.331361	0.25932	-2.20823	0.676054	-0.320092	-0.172914	-0.900218	-2.77452	-3.35048	1.64359	1.86176	1.52993	-1.05203	1.57426	-0.423839	-0.0952056	-0.143243	-0.560725
GSM1426100	9.97841	9.8963	2.80672	-4.41737	3.59104	1.96168	0.510516	-0.284704	-3.21027	1.41303	-1.53358	-3.34498	-3.08396	-3.39922	1.83927	-0.265591	-0.983977	-1.98279	-2.51031	0.62097	-2.64609	-1.04121	0.36833	-0.779169	0.789366	3.10158	4.55672	-3.50797	0.847767	-1.09748	3.14007	-0.618363	0.0591119	0.502725	1.21253	-0.563274	1.62431	0.914976	1.57496	-0.972512	0.557641	-0.75669	-2.40669	-1.08959	0.445916	-1.26209	0.205167	0.174006	-2.0948
GSM1426101	-11.5407	16.1847	0.915395	4.13523	-4.99774	2.6176	-6.88429	-1.62484	1.89185	1.21389	0.115079	-2.33436	1.38564	2.21032	3.04306	0.502306	2.09808	0.0106712	-3.39285	0.311109	-0.908483	0.0779438	-1.0185	-1.47966	2.55081	3.40258	-3.11933	-0.48681	0.250977	2.35047	0.698369	-0.83894	-0.298313	-2.3315	2.12829	0.951149	-0.837198	0.555941	1.99025	-1.03547	1.69394	-2.29757	-0.110836	-0.536417	-1.97291	-0.598324	-1.75245	2.27552	-0.468992
GSM1426102	12.8383	-3.68032	4.22349	1.29861	4.54047	-4.37521	1.3343	1.83588	-4.19109	4.00421	2.29132	2.09491	2.21005	1.67637	3.46325	0.891176	-3.10613	1.4394	0.634871	-1.29256	-1.38058	3.34028	1.29283	-0.831945	1.84113	1.74526	1.01558	0.753908	-0.185439	-0.210581	-2.00245	1.35588	-0.53316	0.375354	0.161235	1.73175	-1.31396	1.68282	-0.30692	0.0925018	-0.0970628	-1.88607	1.42876	1.76585	0.914718	-0.0752116	-1.86043	0.507037	3.41969
GSM1426103	15.5607	1.78116	-2.67763	1.17847	4.25751	-1.23291	1.7848	1.10373	-0.0501398	3.97931	0.649156	-1.06584	0.0924711	-1.26832	-0.407345	0.607567	1.25175	-0.296966	0.333138	-0.189729	-1.47429	0.221746	1.38006	1.29788	1.83985	2.55713	-0.867988	-1.73267	-2.14613	-2.11653	4.64557	0.467152	1.44555	0.0452357	-0.895963	1.09415	-0.968586	-0.25373	2.68181	-0.289839	0.896281	-1.27987	-0.76226	-1.12601	-2.19201	-2.10922	-0.0096014	1.17921	-1.41517
GSM1426104	17.2763	2.81749	-2.52142	3.68362	3.88641	-2.51469	2.20793	-0.690981	4.67276	-0.81565	-1.51618	-2.33389	-1.31928	-3.71344	2.64825	0.0327468	2.60753	-1.70408	-0.238832	-1.85128	1.2741	4.36944	0.97576	1.02908	-0.274696	2.25842	-4.19174	-0.188088	1.79059	0.682466	-0.254916	1.00497	-1.47729	1.78204	-0.512555	-0.648664	1.78674	-0.551771	-0.853598	-0.142947	-1.35265	-1.49137	0.952979	-0.745004	-0.957526	-0.286521	-0.704622	0.849507	1.70956
GSM1426105	22.8915	7.26466	2.39114	-1.92659	1.67258	-1.46558	6.06881	-2.79048	-1.87041	2.19753	-0.355722	1.65643	-0.52073	-7.4465	2.02619	-1.26927	-0.933004	0.00195001	-2.49077	-0.031485	-0.206249	-0.252169	0.584606	0.32599	0.957682	-1.66309	-0.393956	-0.38656	1.32565	1.39098	-0.804672	-2.06122	-1.85616	0.524109	-2.3386	-2.97731	-0.681203	-1.21054	0.769827	-1.41767	-1.86176	2.89895	-2.94901	0.62866	-0.659964	1.21102	0.0773231	-0.15585	-0.800701
GSM1426106	9.2077	-2.60115	-7.39247	1.80919	2.97952	-2.22746	-3.17742	-4.32318	-3.66693	2.81574	2.98464	7.23823	-1.41021	0.262951	1.7213	-0.0463782	-2.72436	-1.327	-2.93905	-1.11157	-2.63951	-1.30112	-1.84208	1.00827	-0.475836	0.0526597	1.19909	1.61649	0.380409	1.17549	-1.67794	-0.42704	0.061493	1.63928	-1.10858	2.13491	2.75185	-0.550886	1.26052	-1.39122	-0.582513	0.645063	0.149288	-2.15225	0.414048	0.0560782	-0.473716	2.23089	-1.82908
GSM1426107	13.842	5.34647	0.546582	-0.982249	2.93206	-1.86964	3.12173	-0.879919	-3.02349	3.72164	-2.82575	-2.62437	-0.954466	0.917788	-1.42756	1.04244	0.994171	-0.508376	-1.63194	1.24031	2.65334	-0.173179	0.988177	1.46307	-0.560815	-0.651155	0.827885	0.0156251	-1.12905	1.81793	0.99326	0.0794519	-1.8648	3.09437	0.957891	-1.98247	0.172171	-0.361914	3.79053	-0.124345	0.732646	-1.91117	0.48488	0.580268	2.27586	-2.62055	1.24895	0.871001	2.91697
GSM1426108	18.5928	-1.25141	-6.0164	9.96529	2.30443	-5.2576	4.39518	-1.60566	1.98898	-4.02651	-3.43104	-1.40336	-5.39679	1.42512	1.22648	-2.40462	1.79245	1.85968	-0.280136	0.518386	1.87398	-5.75614	-0.0622218	0.542303	-0.980972	1.49908	1.47026	0.776057	-1.35292	1.29713	-2.31467	-0.870375	0.474419	-2.10138	-0.96565	1.91637	1.58241	0.959725	0.464775	-1.99698	-0.756888	0.116413	1.36247	2.31988	0.770227	0.566145	-0.653849	1.87766	-0.658774
GSM1426109	4.65734	2.13022	-4.23649	0.289017	3.59933	-2.46665	-1.3071	-0.443695	-1.86763	1.57656	-1.66856	3.33429	0.229842	0.387635	-0.601788	2.77586	-0.882336	-1.48748	-0.61877	-4.00225	-0.794788	0.0264167	-4.20794	1.01735	-0.897512	1.36928	1.24556	1.64185	1.30769	0.764046	-0.157891	-0.618889	-0.783654	3.14853	2.81297	-2.29149	-2.12001	-0.311107	-0.805908	0.546296	-0.334658	-1.94988	-0.522207	1.20507	-0.257686	1.526	-1.92817	0.00971115	-1.26232
GSM1426110	22.6005	-8.62493	-1.40368	7.06237	2.81643	-3.47694	0.175136	-5.05329	2.7769	3.92909	3.48766	-1.92187	-2.09814	-0.157866	-1.668	0.719815	-2.04684	0.678442	0.407189	-0.672995	-1.8403	-2.07938	0.367932	-2.69914	-4.33988	-0.829373	-2.55255	-1.22668	3.43718	-3.02223	1.48252	2.03215	-0.446234	-1.53731	0.337172	-1.97051	1.38955	0.281734	-2.47378	0.00442481	-0.303898	0.871232	0.935764	0.139572	-1.15758	-1.66168	0.392116	-0.192024	-1.52816
GSM1426111	11.608	-0.365832	-1.4506	3.99389	0.571236	-3.66044	0.0274089	1.34354	-0.380165	4.11044	-1.01774	-0.769808	1.21667	0.552825	-2.47722	-0.672473	1.0161	-1.82025	3.69339	-1.17702	1.25838	1.92337	-0.889712	0.349412	0.681098	1.05697	1.62812	0.365122	1.44708	-0.126572	0.686734	1.22454	1.43969	2.62357	-2.66447	-1.48938	0.0120679	1.12421	0.643569	-1.76898	-1.2066	0.327513	0.01359	-1.04247	0.739016	-1.0311	-1.22342	2.26884	1.24675
GSM1426112	-0.446286	-2.32856	-16.3476	-3.97893	-0.456108	-1.19137	-0.985834	-2.41681	1.73204	-0.545885	0.580685	0.327429	3.26987	2.80144	-3.2563	-0.276413	-0.897327	-1.20402	-0.966444	-0.0328987	-0.370747	0.560886	0.676243	-5.3502	3.12632	0.320001	0.489046	-1.15975	0.823128	0.0120358	1.87801	-0.341157	1.28583	-0.865498	1.65515	1.44848	-3.22805	-1.44761	-1.03853	0.765269	2.1445	0.55828	0.947738	0.0517597	-1.76442	1.46341	-0.616378	-1.84648	2.33051
GSM1426113	6.46384	-1.79231	-8.67427	-7.60021	-0.884064	0.947971	-2.60888	-1.14309	-2.67737	3.6396	0.743107	0.286757	-0.0984636	1.96914	0.888503	1.19143	-1.34965	-1.10922	-0.734389	0.230965	-0.103599	3.10427	1.43247	-0.110868	1.36205	-0.0448486	-3.37139	1.14506	-0.830522	1.15246	-0.0844749	-0.427613	1.84031	0.596825	-0.156503	3.10897	-1.2211	0.118069	-0.872689	-0.857264	-1.14664	2.89919	2.96177	-1.28295	-0.0744127	0.906582	-0.761233	-0.740601	0.367485
GSM1426114	10.8292	5.40983	-10.3974	-8.45416	-5.2225	-4.83654	-1.80834	-2.22505	-1.02375	0.15228	-5.19006	-2.79066	2.77693	-4.28242	-4.02184	-1.01527	5.07242	-1.10806	2.94203	1.67737	-1.90473	-2.44347	-0.762385	-1.48509	1.10113	0.393094	1.09714	0.650745	-0.853372	-1.53583	-0.381418	-3.05363	-0.0419041	0.846442	-1.1803	-1.56844	1.16546	-2.87533	1.59754	1.98622	3.53112	-0.145397	3.3206	-2.5553	-0.721239	1.48258	-1.01019	-0.823192	-2.13406
GSM1426115	5.69018	4.63838	-3.35458	-3.44267	2.89478	7.44392	-1.23174	0.238944	-0.924137	2.94515	3.59962	0.252317	3.44584	1.74788	3.33512	-4.4093	0.472013	1.05007	0.369039	0.151883	-1.11489	1.43773	2.13052	2.07333	-0.286227	0.623299	-0.0239364	0.478223	0.427968	-1.94284	-1.59864	1.17512	0.998366	-2.66379	-0.389965	0.236666	1.54035	0.222824	1.59273	1.1641	0.355939	0.0938513	1.89816	-0.558044	2.2383	3.42685	0.786639	1.0975	-1.36232
GSM1426116	19.2763	0.940934	-11.4195	-7.98403	-3.16084	-4.16293	-0.794627	-3.18548	-0.378646	2.57148	-0.0115779	0.370691	5.27344	-1.04842	2.2693	-1.38134	1.62411	2.04032	0.332624	1.20928	1.21305	-3.02328	-0.459956	-2.1944	-0.846362	-0.516117	-0.330856	2.31304	-1.33241	-3.34117	-0.116489	0.0974795	-2.52263	-0.526954	0.0367709	2.62115	1.79577	-2.9409	0.20312	1.13767	0.120533	1.42022	-1.69424	0.547783	0.507943	-1.76872	-0.573833	-1.56202	-0.795955
GSM1426117	9.25589	-7.46162	-5.58176	-1.41301	-3.92076	-2.15334	6.02365	2.7356	-1.65235	-1.06018	-1.37718	-0.712889	-2.55639	4.73461	-3.67308	-4.15934	-0.984253	-1.76307	-2.92756	-0.841041	-6.37026	-2.19932	-0.246376	-1.89462	0.588956	-0.785329	-0.541024	-0.599818	1.04504	5.26434	3.0242	-0.321002	2.42617	-2.54168	-2.09567	-0.984445	-0.256418	2.67564	-1.4672	2.48191	1.14559	-1.72372	-2.0619	-2.11306	2.79743	-2.58982	-0.645787	-0.864359	-0.130471
GSM1426118	14.4859	-0.668637	1.25544	-5.17067	-1.80309	2.57464	1.25811	3.81451	-2.40328	2.14306	-6.4735	-0.723988	-2.09578	-1.47747	-4.67241	-3.80878	-3.89281	2.80056	-0.158847	-6.62202	-0.519082	1.43973	0.094778	-1.56642	-2.02906	-1.43216	1.50737	2.30757	1.20496	-0.212809	0.390707	1.26138	2.17975	-2.65435	-0.336879	-1.9421	2.23176	0.837807	1.10285	-1.19683	0.0659946	-0.53055	-1.2994	-0.632081	-2.41255	3.07528	-1.18802	1.08001	0.918992
GSM1426119	4.11397	1.53218	-4.01158	-9.30771	-0.247094	0.967694	0.499827	4.21223	0.960675	-1.21849	2.34761	1.74477	1.45619	-0.183723	-4.52715	-1.53752	1.73883	0.498478	-0.694279	0.628722	1.30914	0.187563	4.0595	-1.02988	-0.164559	-1.77056	-0.942479	-1.05672	-1.86081	-1.92066	1.28012	2.44846	-0.906752	-0.954523	-1.49328	1.19943	0.446181	1.70411	0.0994538	-1.68439	-1.81973	-2.54458	1.24841	-0.545529	0.678066	0.382861	0.448634	-0.793897	-2.67147
GSM1426120	1.26763	-3.15046	-0.432362	-7.02974	-1.64035	1.82288	2.46869	3.98434	-3.9108	2.13524	0.97136	1.33082	-0.392531	1.67559	-1.37795	-1.68458	-0.926812	0.728812	-5.23791	1.63153	-0.702826	-0.218715	1.52614	-2.58803	2.50472	1.28525	-3.12482	-3.72544	-0.111429	3.83162	-1.11517	0.328762	-2.98793	2.10557	0.120406	-0.412874	0.75973	0.877115	-3.72359	1.47072	-2.26924	1.15711	2.41926	0.144953	0.50535	-0.760566	1.66625	-0.327406	-0.17325
GSM1426121	16.3269	-0.62843	-5.37444	-4.68242	-3.82443	-1.57996	1.04358	0.916639	0.25242	6.97702	-0.688405	1.78503	2.07103	6.08043	-4.09883	-0.472805	0.978628	1.70292	2.28766	-0.758116	-0.387523	-1.88961	-4.98621	1.07106	-1.36802	0.90933	1.78761	-1.85243	-1.16735	-0.943194	-1.3832	-1.23237	1.28563	0.772963	1.40717	2.31104	0.873499	-1.2654	-2.20159	1.62179	-2.40898	0.804602	-1.11669	3.97763	1.79917	-0.835343	2.26202	0.321923	1.70242
GSM1426122	0.10297	-0.12805	1.40955	0.208756	1.45685	0.848065	-1.51563	4.41991	-2.11281	3.86061	0.559434	-0.333145	2.76673	2.55701	1.41551	-1.0658	-0.232496	-0.0082191	-0.841579	4.04008	2.45988	2.22988	-0.538791	3.36766	-1.12923	0.819192	1.4852	0.212133	0.0663691	0.413576	2.45522	-1.55093	-0.330851	0.174111	-0.207417	0.61381	0.468631	-2.5249	-0.46662	0.422684	1.17656	-1.10344	-0.676234	-1.56583	0.520333	3.65778	-2.60162	0.556397	-0.950255
GSM1426123	-14.7059	7.15194	-9.10397	1.53151	5.37257	3.34083	0.42289	0.978115	1.9198	0.119527	0.4507	-0.442956	-4.15014	2.10872	0.549088	-1.91572	-0.273186	-0.642007	3.06293	-0.582366	-1.80708	2.40947	0.966521	1.32035	0.460858	2.74251	-1.89582	0.679867	-1.32008	-0.98252	-1.68022	-1.0865	-1.2384	0.850281	-1.63611	-0.609144	0.0887738	1.52672	-1.97806	2.06366	1.73877	-0.426882	-1.49214	0.332596	0.458034	-0.205077	1.10113	-0.864449	-0.648337
GSM1426124	22.8309	1.23538	-0.259972	-1.59414	4.39821	6.17847	-2.39429	0.711443	1.21348	1.66687	2.70782	-4.74979	2.46832	1.57055	-0.595878	-2.63698	-0.257348	1.28686	4.74603	2.1157	1.38097	0.964045	2.60568	2.49783	-0.900934	-2.01604	-1.16814	1.20872	0.455887	2.13511	-1.31637	0.835185	-0.696308	-2.33348	0.730623	-0.584435	1.8111	0.0866149	-1.94512	-0.86333	3.81679	-0.214478	-2.80182	-1.07912	1.60177	-0.783965	0.354796	1.69739	1.19712
GSM1426125	-2.84197	5.38935	-2.18578	0.641432	3.14629	2.34539	-1.49669	2.037	0.830148	-3.54738	-1.07159	-1.78253	-3.09438	2.23796	-0.263371	-0.977665	-2.66444	3.67105	2.27538	2.07315	1.78118	1.63359	-1.0358	1.67811	-0.379163	-0.277371	0.586776	0.625032	0.0731791	-0.0975844	1.46484	-0.863899	-3.77595	-0.984065	-0.449138	-1.47764	0.248792	-0.575616	-0.411568	1.31697	0.312696	3.49376	0.715919	-0.558446	-1.86488	-2.05908	-2.21741	-0.332006	1.97371
GSM1426126	0.251926	19.158	11.1468	-0.996488	-6.58636	-5.46496	6.91575	-3.45208	7.31133	1.53353	-1.98808	-0.468418	-1.85334	5.76308	1.73761	2.70032	-3.69069	-0.338592	-1.32357	1.66941	4.40965	-4.16552	5.7772	0.318876	0.0159552	4.03378	2.14615	-1.50621	-0.653887	-1.06056	2.8243	2.18876	-2.06327	1.79235	-0.175213	0.826463	-1.42985	-0.487065	-3.01198	2.56879	-0.817112	-0.758293	-1.71439	-1.25219	-0.894514	3.84105	-0.262224	0.0552509	-0.949859
GSM1426127	-2.60719	4.36421	-2.94162	12.7604	-15.1562	0.984561	0.960644	0.303432	-3.24456	-3.07155	1.16425	-0.947006	2.91669	-2.70157	-0.594076	2.04004	-1.96569	-4.34474	-0.435688	-3.17469	-0.751511	-0.295585	1.09612	2.29221	-2.18621	1.77219	-0.0755329	4.20443	0.659284	0.878921	6.99753	-3.3293	-0.816543	-2.83908	1.10622	-0.0144688	3.31584	-0.376998	0.898557	3.86537	-1.3648	1.93469	2.6945	3.34781	2.15835	-0.167985	-0.627354	-1.30298	1.44299
GSM1426128	-5.23983	7.89677	-7.46841	1.97627	-3.8688	2.72256	-1.07893	-2.15129	0.30049	-2.10387	-1.5616	0.609264	0.680241	3.01417	-1.6209	-2.03619	-0.162671	2.3025	-0.324294	0.379023	0.370926	3.28305	1.87781	2.37909	0.572823	-1.83764	1.97646	0.73237	-0.0346553	1.26648	0.41673	-2.7214	-3.94885	-0.564837	-3.52679	1.30692	0.0377897	2.5509	0.6441	-0.716196	-0.54533	1.89279	-1.77699	0.637924	-1.71098	2.43874	-1.25597	1.78814	0.556126
GSM1426129	5.95684	8.07133	-2.67955	10.5858	-12.7851	4.72748	-3.58623	0.0770857	1.31381	2.39918	0.755973	2.84994	1.73378	-1.60481	0.585657	2.51294	-2.09784	3.80107	1.55292	0.625818	-0.519355	-0.47827	-0.400804	-0.42582	2.5709	-1.68593	1.20475	1.14701	4.71288	-2.91859	0.102558	0.577773	2.88327	1.74884	2.42359	-0.945953	-0.326249	0.730123	-1.28876	-0.240615	0.380373	-0.5423	-4.81819	-1.54265	-0.820734	-0.690837	1.9678	-0.296295	0.853417
GSM1426130	-22.9049	3.5804	-1.62498	7.03646	-3.66978	-0.576187	-1.0717	1.9127	-2.55844	2.84957	-1.83014	3.9479	0.735759	3.26087	-0.872412	-0.790607	3.14022	1.17939	1.91899	1.11969	0.568812	1.09632	1.87122	-0.122221	-0.929078	-3.39689	1.74108	-2.30848	-0.0099402	3.55895	-0.912211	-0.813469	-4.30932	2.97165	0.401538	-2.47438	1.87474	-0.646859	2.1831	-2.44364	-2.55978	-0.358162	0.0497147	-2.21055	0.663585	-0.874333	0.852947	-3.37609	-0.0590655
GSM1426131	0.732229	11.0426	7.2033	1.0764	-3.5226	2.37887	-5.72393	1.71256	-5.41804	-1.21738	-3.25037	-1.61467	0.833498	-2.96745	1.03357	-0.443802	-0.479722	2.29457	0.69308	-3.03315	1.40008	-0.559079	3.11787	0.947327	-0.102304	-0.478581	-0.430128	2.27796	-0.815691	-0.353203	-1.12846	-2.40193	-0.0991305	-1.69114	-0.0805432	0.54986	-2.73392	-1.1961	-1.51602	-2.66161	-1.75206	-1.97105	1.24146	-0.0854053	2.27349	-1.52401	-1.46952	-1.78519	-0.364752
GSM1426132	-9.73845	13.5055	3.8459	-6.74489	2.69904	5.10137	-1.50522	-1.72417	-2.7249	-0.937151	-1.9794	1.09443	0.547917	2.33174	-1.70716	-3.93766	-0.232114	1.15152	2.40536	-2.13951	-0.540852	-0.312146	0.861803	0.136114	-1.00382	0.240383	1.81874	-3.23276	2.82886	-0.648134	3.13353	-0.457053	-0.218601	1.96729	4.45853	-1.36043	-3.82097	-1.29738	0.289802	-2.34181	-1.65467	0.743457	1.00557	0.0235656	0.876239	-2.22582	-0.31009	-1.09604	-0.594398
GSM1426133	19.1513	-0.377037	-3.57833	5.72767	-3.73685	2.77367	-1.48196	-1.46687	0.976549	-1.31657	1.63924	-1.50338	0.295749	3.57033	-2.18491	0.134041	2.63978	-2.10822	-2.77696	0.224512	1.11763	1.3333	0.625339	1.97426	-0.347397	-3.16483	1.42386	0.326332	-0.131858	3.0142	-0.882754	1.48032	-1.50638	-0.979819	3.22754	0.883115	-0.42146	2.22212	0.679833	-1.8172	-0.779726	2.59007	-0.064374	3.27952	-0.73675	1.60701	0.531404	-0.0062313	-4.23429
GSM1426134	8.69151	3.82848	-1.04942	7.51764	-2.68755	-2.03995	-0.217595	0.478698	0.904043	4.42079	-1.1106	-1.74211	1.82455	1.01911	1.31686	-3.11442	0.57337	0.348276	1.14821	0.0466394	-0.271438	1.71534	1.10846	3.31053	-2.7842	1.63474	-0.71588	-0.738588	2.20219	0.701053	-0.577777	1.64667	1.40839	0.548127	-1.68849	-0.170207	-2.13397	0.503618	0.523309	-2.65831	-0.0791957	-0.997884	1.48108	2.11846	-1.8172	-2.86288	2.41907	-0.846746	-2.31274
GSM1426135	14.5277	-1.58271	-0.663533	5.26648	-2.19051	3.89173	-4.15422	1.67153	-3.2883	1.47377	3.91396	0.441988	0.554476	1.05721	2.57666	0.598846	-2.43369	-2.21593	1.73376	-1.80461	-1.87747	-3.19951	0.493995	-1.66047	-0.340867	1.60222	1.02648	-1.62879	0.453822	-0.939915	0.215603	3.00262	-1.06496	2.0483	-0.434229	0.128429	-1.48377	-2.48186	-1.7551	-2.69253	0.925203	-1.15336	-0.685709	0.128153	1.20606	1.37009	1.02197	0.0432442	-1.17142
GSM1426136	-28.3361	6.12952	-3.22938	4.08515	2.21019	-5.02412	-0.454275	-0.13875	-3.38553	1.21402	-2.81092	0.852437	0.640999	0.221431	-0.27871	0.831176	-1.24284	2.62719	-0.814784	0.806617	0.138416	1.30649	-1.27462	-0.272072	-0.314864	-1.82119	0.14736	-0.851063	-0.719209	1.02144	-1.62779	0.0111621	0.98743	-0.155278	-0.993878	-3.92641	0.00413856	-1.51039	-3.41162	3.07378	2.05518	1.43933	-0.0645251	1.99449	-2.47136	0.961528	0.651982	3.25697	-4.09061
GSM1426137	-2.19406	-1.19583	-5.16478	9.20673	-3.4255	-0.213386	8.88443	8.05703	-1.13698	4.39437	3.99258	-3.07697	-3.3824	-4.12802	0.941933	5.30466	-2.71534	2.66265	4.17147	2.07482	-2.19056	-0.204336	1.39361	0.3578	1.53898	-2.36025	2.63245	-5.23859	-3.50984	0.317188	-0.339196	-2.98355	0.633362	-1.9634	-0.164877	0.451809	-2.17032	0.561297	-0.0553227	-0.477413	-0.589585	-0.572485	1.84571	-0.179547	1.2127	-0.27459	-3.48949	-0.0974673	0.253124
GSM1426138	18.6152	2.64492	-3.92764	6.14888	-4.17116	2.11202	1.87961	-4.50849	2.22343	-3.47677	2.61558	5.31225	-2.95096	0.232229	-0.853052	0.388988	3.47532	3.25439	0.87104	0.402297	1.16347	6.27252	-2.05178	-0.102564	-0.443596	0.822469	-0.26607	0.964047	2.8533	-3.31995	0.614319	0.84422	-2.0535	-1.93173	-2.47228	-1.06993	-1.42717	-1.96141	-2.4379	1.87694	-0.508656	-5.46466	2.21141	-0.785113	1.84031	-0.340507	0.452458	-2.28539	0.220079
GSM1426139	4.81244	10.979	1.46473	-2.54736	-2.57244	2.73117	-1.83719	-4.75852	-1.44527	-1.10836	-1.28892	2.15306	-2.07847	-0.859093	-1.99632	-0.416263	-2.90088	-2.49082	0.959443	-0.83004	1.55611	-0.887452	-0.381898	-0.653586	0.561924	0.804294	0.382754	0.109963	-0.100895	0.242057	-0.762282	0.365361	-1.07222	0.179639	-5.43504	0.893647	-2.0106	-2.53548	2.79458	0.429822	-0.313257	-1.30364	0.236697	-1.47397	-0.8397	1.96207	-1.00264	3.05421	1.48422
GSM1426140	3.23173	7.89119	6.28727	3.96475	-2.11632	0.0386367	-1.84191	-0.560328	-2.91488	-2.01549	-1.48972	-3.02286	1.44927	-1.02815	-1.29369	1.13864	-2.62265	-0.424451	-0.481931	-1.08753	1.75279	0.613064	-1.81637	-1.74842	-0.161678	-0.14161	-5.22082	0.311154	-2.02015	1.5041	-0.472205	0.96382	-1.46518	-1.92325	-0.0068769	-1.63249	-0.278317	1.25233	-1.61236	1.21684	-0.441295	-2.3447	-0.185552	-2.66346	-1.78567	0.0861805	2.48313	1.03044	-1.14693
GSM1426141	-9.92847	3.90562	-4.23824	9.6322	-7.89211	1.00915	-2.00387	0.0112554	-2.51496	2.14285	-1.36581	0.62563	1.68243	2.32623	1.66827	1.20969	1.50483	-0.277895	-0.719036	-1.00667	1.0184	-2.56787	0.870012	-1.09307	2.18816	0.333632	-0.888975	-0.396776	-1.49189	-0.771725	-2.17894	-0.2465	0.762771	1.06103	-1.30077	-1.24275	1.59057	2.47605	1.19017	-3.18731	3.7946	1.55242	-0.880623	-1.318	0.11888	1.85634	-1.49002	-5.29441	0.302377
GSM1426142	23.8189	9.58983	3.60858	-0.355381	-5.10106	3.23824	7.03668	-4.89694	3.17495	-2.22014	2.51007	7.99547	-0.33526	-2.88845	1.45331	-4.52551	0.546535	-4.63933	4.51144	3.97089	3.17902	1.93863	-3.04253	-4.29248	-1.19428	-1.26468	1.03599	0.127169	-4.91775	3.28492	0.978994	0.0221897	3.07805	-0.144065	4.18143	-1.0619	-1.8895	1.38605	-1.30638	-2.02467	1.33942	1.15042	1.77739	-0.895025	-0.959043	0.596015	0.411517	0.660671	-0.0253261
GSM1426143	-21.3885	-0.563891	-0.803153	7.3904	-3.6903	0.329269	1.1224	-0.151714	-1.84069	-1.54264	-0.12315	2.04844	-5.44959	0.339717	0.831764	-1.13804	-1.37149	1.58867	-2.82512	2.2052	-0.757522	1.81278	-0.689241	-3.55617	-2.7986	0.928581	-2.41946	-0.106718	-0.395287	-3.41452	1.96639	3.12894	2.70197	0.312789	1.79215	3.17901	0.92508	2.25421	3.46002	-1.27187	-2.02265	3.27646	-0.25187	-1.66059	0.749215	0.913715	-1.22647	-0.100827	-0.408814
GSM1426144	-5.64143	3.98093	2.35684	6.68689	0.90651	-5.05286	3.22512	3.54057	-3.85153	0.113766	-4.22678	0.120346	-0.589415	0.844436	0.729891	-1.59826	0.649786	0.971625	1.70308	-0.38197	3.03243	2.80499	3.1191	-2.31894	1.79891	-1.35602	1.35217	2.59594	-3.42854	1.40609	-1.26738	6.60508	1.0651	1.06091	1.08662	1.29146	3.88575	-3.98056	-0.0277608	2.85238	0.49024	1.4915	-0.321758	-0.318284	-1.47189	-3.04913	-1.47898	-0.106327	-1.40617
GSM1426145	17.4096	1.38006	2.83178	-2.32428	1.80438	1.56764	-3.04467	-0.994936	-4.8571	-4.82926	2.68328	-1.33679	-1.87176	3.17754	3.87463	-2.24827	-0.381514	-0.323122	-0.178465	-0.741674	-1.98633	-3.12585	2.84448	0.409132	-2.1261	-2.4599	-0.40874	-1.217	-2.85298	-1.95463	-2.37397	0.054216	3.70481	-1.67022	1.86035	-2.32547	-0.0975001	-0.697212	2.26887	1.64504	-2.07314	-2.21871	-1.81299	-1.04834	-2.46602	0.30415	-1.67169	-0.622167	4.48741
GSM1426146	6.43816	10.2382	5.64536	2.99007	-5.47247	1.02967	-1.10725	0.849934	-2.08495	-2.29342	0.448291	0.094283	-0.989725	-1.03981	-3.29291	3.16871	-1.52178	-1.90407	-2.03753	-1.60717	-1.10993	-1.93492	-2.48647	2.89546	2.43634	-1.18565	-0.295496	-0.066469	-0.246902	-0.362751	-0.972033	4.70205	0.222192	1.47734	0.570882	0.853194	0.439292	-0.704849	0.248155	1.88253	-0.140289	0.937133	1.19368	0.0482031	-0.0625125	-0.248704	1.70837	1.05383	1.33192
GSM1426147	5.56555	3.06517	-2.6763	0.762683	1.30317	2.66258	-2.4244	-1.47716	-4.70776	-5.24819	2.03022	-2.58124	-1.98697	2.08126	1.44111	2.02317	1.69049	-2.19827	-0.367986	2.93775	-0.523824	-2.06611	1.73698	0.191606	-0.94105	-2.60232	-2.77669	-0.0551729	-2.68761	-1.72676	-1.15746	2.17403	1.11556	3.04925	-2.42546	-2.32861	-1.43205	-2.02823	-0.0642443	0.174186	-0.392916	0.10066	1.44842	0.894206	2.17416	0.0721431	1.11362	0.779652	1.5525
GSM1426148	-19.8199	-0.445797	-5.5992	3.89964	4.05562	3.7396	-2.88876	-2.39507	-1.79258	-2.90846	0.394218	1.04848	0.250214	-2.14465	1.98997	0.0453548	1.29275	0.319374	0.919064	0.932505	-0.9739	-3.01345	2.08292	-1.53732	-3.20232	-0.337637	-0.496375	-1.4551	-1.07932	-0.697256	1.22137	-2.52195	0.242634	0.170592	1.5043	0.588393	3.09957	-0.998748	-3.43154	-0.209104	-1.52925	-0.186299	-2.66226	1.0033	-1.74006	-2.85934	0.459782	2.48099	-0.430926
GSM1426149	-0.372537	-0.380754	-3.56603	3.42869	0.825996	0.0271644	-1.0849	-0.895312	-3.62178	-4.91988	-0.0236532	1.12094	-2.99871	1.80718	3.46913	2.34222	0.327318	-0.615425	1.83976	3.78779	-0.835748	-0.790475	0.139134	-0.0729795	-0.0798077	-1.63517	-0.8381	-0.599756	2.41013	0.579452	-0.310153	-2.59294	0.729294	0.518614	-0.85606	1.92553	-0.883984	-3.23525	-1.72517	2.0701	-0.61338	0.847798	1.17742	-1.47506	-0.430014	-0.483547	1.24829	-0.0965217	1.14281
GSM1426150	3.02748	6.16314	-0.379444	-0.442878	2.65688	1.03604	-1.75268	-1.18077	-6.50204	2.50654	-0.183813	-0.614076	-0.321078	-3.97552	1.02212	-0.583565	0.269512	-0.326663	-1.6619	1.04731	0.686713	0.700155	0.235911	-1.23259	-0.401187	1.17341	0.179945	2.15425	0.696848	-1.99541	-0.588573	0.257271	-1.62103	-1.14524	1.0938	2.87858	0.360561	1.18659	-1.34943	0.910045	-0.348424	0.836467	-0.321757	1.2779	1.00067	-0.212792	2.56379	0.804732	0.325834
GSM1426151	1.11929	-0.0644841	1.87556	0.52783	4.9505	-1.84011	-0.309183	2.38112	-1.91532	-4.11329	-1.27897	2.09429	1.8726	0.856603	-2.03869	0.0557585	2.39779	3.60078	1.01664	-1.27499	-0.789545	-1.95616	-1.40142	0.324471	0.955162	0.780714	-0.839998	0.291445	0.379923	-1.68516	-0.531988	1.2803	-0.660792	-1.66667	1.69314	-1.3804	0.569561	2.74237	1.38461	2.3495	-0.871539	-0.303673	-0.242829	0.258816	-0.662538	0.338806	-0.420911	-0.238942	0.933807
GSM1426152	11.1735	6.4889	5.65632	-3.90193	2.64691	0.956199	-0.560341	2.98025	-0.423475	-4.12977	-0.859785	-1.23404	-0.683294	-1.694	-4.42344	0.762366	-0.314669	-0.850573	-0.911381	1.92969	-1.42632	3.05023	-0.0337695	-2.83518	0.691736	0.274656	-1.43258	0.910084	1.88612	2.54408	-2.00338	0.207077	-0.501432	-0.0193395	1.40992	1.1575	0.369965	0.381196	0.557922	-1.40943	-0.413743	0.197093	0.425804	0.862406	0.484475	1.1926	-0.323205	-1.45099	1.28792
GSM1426153	-10.6714	6.85893	-4.09813	-4.32926	6.96996	1.45528	-0.586483	2.15611	1.0598	0.160404	3.94082	0.87419	-1.89358	1.27063	-0.552246	-1.3986	-0.370229	-1.46419	-1.9466	0.513492	-0.71663	0.453693	0.934594	-1.65758	0.125946	-1.10136	0.779374	-0.0366761	0.948042	-1.19209	1.15542	1.09785	-1.31089	-1.03131	0.28857	-1.5088	0.152361	1.78183	0.0680014	1.8045	1.69237	1.72509	-0.733123	-0.48931	0.0565552	0.981026	-0.0454732	1.81582	0.821229
GSM1426154	1.91414	2.88177	1.58005	-0.851972	6.69314	-0.300769	-0.716017	4.22028	0.594232	-2.64507	-0.877605	0.716279	1.88514	-2.01945	-1.20123	-0.28039	2.27123	0.91562	-1.21455	0.20819	0.821342	-0.967432	-0.168112	0.375604	0.251089	0.656746	-1.21702	0.566328	2.58556	1.14162	1.7188	-0.109521	0.114971	-1.65357	1.35199	2.12069	-0.002217	-0.412002	-1.13721	-0.461843	-0.547017	-1.10101	-1.82586	-0.536781	0.939786	-0.374506	-2.18131	-0.388601	-2.36755
GSM1426155	-12.8437	-1.69422	-1.31435	5.22041	-0.110898	-5.52654	1.612	4.04078	1.0384	-5.94961	0.254052	-2.26958	3.10283	0.770177	-1.1887	0.449528	-0.955429	1.37364	-1.19192	-1.47544	-0.323647	1.45557	-0.0747357	-3.77662	-0.410246	-2.44248	-0.453575	-2.0561	0.936764	-2.93189	-0.450538	-0.419335	-2.60805	-1.31844	1.31407	2.407	-2.73083	-2.49107	1.42419	-2.03448	2.1039	0.770198	-0.928861	0.113751	5.60879	1.30261	-0.290334	3.63649	-1.09488
GSM1426156	2.86009	-3.84579	-1.61419	1.85093	4.28437	-1.7444	4.91538	4.51491	5.70571	-2.94304	5.52358	1.59812	3.59619	-1.55493	-0.9004	-0.906533	-3.94618	-2.88689	0.403325	-0.693708	-0.999292	-2.00616	-0.427593	0.260151	-0.364423	-1.51697	-2.75891	2.91642	-0.627868	-1.63577	-1.00323	-0.33118	-1.19046	3.638	-0.716674	-0.264479	-2.48399	-0.0521227	2.91162	-0.75471	1.78017	0.194772	-1.55812	3.51054	-1.36783	-0.998291	-3.07355	-1.28686	0.162558
GSM1426157	-2.38579	-3.58535	5.01088	2.49582	4.39836	-2.98772	-1.30841	1.03545	1.49187	-6.40785	-2.62143	0.914425	3.78052	1.62517	0.878952	0.219902	-2.29431	3.91421	1.13676	0.582897	-2.28433	-1.69027	-1.19737	0.288189	1.09171	3.57965	0.939566	-2.0414	1.52276	-1.68746	-1.15546	-0.17919	-0.5043	-0.708395	-2.55467	-0.750806	-1.62966	0.143576	-0.238432	-1.75452	-2.28984	2.99274	1.27475	-1.47799	-0.0423597	0.937672	-0.0323788	-0.0629731	-0.439175
GSM1426158	-24.3084	27.7764	9.79989	-7.24992	-5.08176	-1.92965	3.51014	-3.65221	6.62218	3.14759	-1.07535	-0.433345	2.0666	0.828218	6.65905	-1.01019	-0.0816687	2.90059	2.23788	-2.88048	-5.47883	-1.14586	-1.32887	-2.13144	-3.20056	-4.18155	-1.66934	0.989252	0.443466	1.79562	-0.877094	0.542817	0.802806	-1.29202	-2.9753	1.7185	0.960411	1.3947	-0.0595398	-1.35078	2.17724	0.100893	2.2659	0.907958	1.72501	-2.43648	0.620061	0.884552	0.341657
GSM1426159	-3.92124	9.30809	7.31049	-2.55631	3.02961	-4.25133	-0.673172	2.92778	-1.23326	-5.06385	-4.61887	-4.14388	5.80547	-1.40754	-0.587692	0.250019	-4.02158	-4.4207	2.67075	2.99202	-1.25138	3.86909	-4.95529	0.0802706	-1.06346	1.95989	0.872925	-2.16644	-2.67431	-1.17591	0.367615	0.695575	0.794576	1.0083	-0.213374	4.48654	2.12413	0.631602	-0.683406	-0.486088	0.354132	-0.559036	-2.70202	-0.290215	-0.235311	-0.401058	2.76159	-3.25725	0.296226
GSM1426160	16.175	8.68878	3.14284	-1.97116	1.57299	0.79769	0.16639	0.453928	2.32244	0.67271	1.61646	-1.1051	-0.175865	0.87904	-1.79217	2.5308	-1.82129	1.56071	-1.78246	-0.663395	-0.248403	-0.720412	-2.00855	0.107394	-0.630212	0.0920744	-0.800287	0.677058	-0.164987	-2.16712	-1.29964	0.840323	-1.71845	0.0226866	-1.7979	-1.07128	1.20046	1.31074	0.640835	0.580258	0.727801	1.79242	0.0679523	-0.745638	-0.0687666	-0.219102	-0.72216	-0.4987	0.362979
GSM1426161	-29.1333	4.11793	-11.6547	-0.437266	0.187208	-2.3717	1.94631	4.47047	1.67544	-4.81479	8.01273	-0.305888	2.34283	-3.65337	-1.89505	-1.69312	-3.4543	-2.83839	3.6312	-2.23686	-1.26473	-1.24516	3.02109	0.846102	-3.90206	2.67907	1.57423	-0.791589	1.7055	3.27322	-1.0974	0.545483	-1.32514	1.79015	-0.426384	-1.38175	2.6894	-0.887219	0.911617	-0.963224	-0.181451	-1.90852	1.07512	0.125772	-3.04122	1.5357	3.1182	-0.291291	0.599731
GSM1426162	8.66971	9.73992	1.05283	0.962148	-1.31359	1.52978	-1.24526	-0.787919	2.09218	-5.00202	0.220507	0.618047	1.16429	2.46432	-1.14205	1.87614	2.49595	-1.0314	-1.00117	-0.0644767	1.13471	1.51584	1.31106	0.010357	-0.047218	-0.473012	-0.326817	-1.08889	0.158699	-0.993446	1.18212	0.0566448	0.292861	1.53767	1.5294	-0.0843973	-0.676865	0.396201	2.23984	0.476881	1.64322	-0.277949	-1.25412	2.38428	-0.968618	-0.790236	-0.305122	0.998215	-0.0688493
GSM1426163	7.84204	2.46622	-2.93282	0.955581	2.88994	0.977742	-0.979663	3.52039	3.25258	-2.59465	0.106522	2.61211	-3.34888	1.51968	-2.81096	3.83558	2.15753	1.04902	0.518839	1.72529	-1.15213	1.50982	-1.0878	1.51296	-0.830508	0.967437	1.49185	-0.0476527	-1.45884	-1.08849	-0.523467	-0.262279	-0.196407	-0.738204	-1.01899	1.45969	2.51386	1.42857	-0.0770001	-0.922834	0.242993	-0.0806919	-1.00683	1.44372	-0.652899	0.0248731	0.546403	-0.242863	0.0556768
GSM1426164	-13.3584	-3.4531	11.7176	0.831553	1.59265	-4.39638	-1.03643	-3.54383	0.937895	1.54339	3.08166	-2.05536	-2.01445	2.53064	-2.72417	4.54942	2.65082	-1.12845	-1.27741	-0.46307	1.49579	-0.838909	0.596637	1.1334	1.34	0.370842	2.85426	2.32452	-0.802213	0.777344	-0.409097	-1.24827	0.049924	-2.83839	1.63867	0.0691773	0.718025	0.0794811	1.97323	-2.50661	1.48096	-0.142988	1.86027	-2.56009	-0.921259	-1.13423	3.48911	1.03638	1.37412
GSM1426165	-27.5912	-4.00614	7.92912	1.50743	-4.13483	-0.318776	2.82334	-2.27433	-5.72918	2.0301	6.72262	-4.01795	1.16892	-1.93382	-2.92002	-4.11709	4.00282	-0.801075	-2.05692	0.707137	3.40587	-2.0964	-4.07992	-5.22099	-1.19023	2.62729	2.47483	0.907698	-0.611899	-0.920397	-1.40435	0.677238	-1.75814	-1.06616	-3.47341	0.0229954	-0.0992651	1.34648	-2.7408	-1.67559	-2.20399	-2.55358	-0.615622	1.64739	-0.165834	1.80562	-1.05046	-0.0957712	1.94285
GSM1426166	-8.29969	-5.00918	-10.0311	6.38293	4.83694	-3.26498	0.10104	-1.57814	2.05019	-2.46061	-1.49463	0.401121	-1.72814	-4.24903	1.29145	-3.71688	-2.6588	2.80972	-4.22111	-5.34792	5.82505	0.267128	-3.4016	1.96823	2.85075	-3.55173	3.72165	-4.82439	0.355709	-0.474118	-0.476697	0.613625	0.929005	-0.269093	0.570973	2.14585	0.686034	-1.04717	-1.06845	-0.611891	2.38675	-1.38026	1.42379	-1.41936	0.594799	-0.845906	2.09302	-0.287384	2.06472
GSM1426167	8.87248	-6.27714	5.08666	-0.0415832	2.2228	-3.5011	0.57097	2.81306	-1.11734	-6.16028	1.89594	1.39457	3.65803	-0.0239356	1.13505	-0.978398	3.08572	4.6269	1.08199	-1.29525	0.931444	-1.806	1.95186	-0.419479	4.69961	0.558123	1.61526	5.25463	-2.29801	-1.36831	3.2467	-0.8782	3.24	2.85821	-2.5063	-2.31682	-1.47627	4.60636	-1.81991	0.404018	-1.20631	0.684277	1.33013	-0.877463	0.183501	-1.79035	1.8678	0.173155	-2.68784
GSM1426168	-22.1074	-2.93392	8.93804	-3.08649	-2.95873	-3.05259	1.62339	-8.64656	-4.00141	-0.0346973	7.23669	-2.418	-5.29685	-3.88822	-7.29798	-3.60592	3.87294	4.36075	4.49972	0.490021	-1.20818	-0.881193	0.390077	4.62103	1.86602	1.73858	-2.14147	0.0171169	1.95282	0.560781	0.350121	1.43398	1.22903	2.50524	2.26141	2.32656	-0.490322	-1.08502	-0.597802	-0.079548	2.50523	2.70259	-1.20829	-0.166813	-0.167101	0.673051	-2.42363	0.220493	0.330726
GSM1426169	-0.286621	-9.80915	6.04008	0.39158	0.626238	-5.59373	-1.39302	-5.09485	0.169917	1.2169	2.6334	2.29442	-2.62609	-0.384683	0.145881	-1.42185	-3.70945	-2.5113	-0.406405	-1.4819	-0.4221	3.00127	2.73908	0.994237	1.25082	-0.422447	0.51307	0.858644	-1.11733	-0.643132	-0.324473	-1.39714	1.76319	-2.14263	-3.36043	1.74708	-0.213306	-0.418508	1.80514	0.799543	0.776861	1.14643	-1.57083	-0.383687	0.695422	0.0364888	3.65278	-4.59992	-1.22097
GSM1426170	2.26941	-5.08174	9.30879	0.413405	3.10411	-3.06471	-2.95551	-1.00647	0.490717	1.22572	2.05621	2.02294	-0.544953	0.818555	0.264724	1.16379	0.221793	2.12967	5.1778	-1.50193	1.78721	0.897297	-1.34007	-0.507434	1.15707	-0.532366	-2.04705	-0.848337	-2.72515	1.43995	4.00913	-4.93228	1.2112	0.492908	-0.536809	-0.267777	1.55915	0.524607	2.04078	0.791558	-2.05145	-0.130483	-2.27754	0.67105	3.27363	3.72365	3.18499	2.496	-0.182647
GSM1426171	-15.4156	-6.1366	-1.91499	1.25796	6.06167	-1.87041	-2.84156	-4.86186	0.162448	0.531193	-0.0592698	4.42826	-1.89616	-0.893065	-0.474438	1.8491	-1.35785	0.226049	-3.64569	0.765725	-1.503	1.83607	2.05469	0.412112	1.12216	-0.007436	-1.49488	1.44631	0.0288125	0.979248	1.53238	-0.933407	-1.08674	1.24285	0.17725	-0.347532	0.591423	1.0262	-1.00478	-1.81116	3.44038	-1.53699	-0.870998	0.867695	1.73477	-0.778841	0.97187	-0.218772	1.09506
GSM1426172	6.99074	-7.07064	5.7203	4.4842	4.81924	-7.23248	-3.78791	-0.379045	-0.475598	-0.288318	-0.764812	2.69298	0.437467	2.52056	1.16429	-0.599522	-0.763166	2.20624	-0.228498	-0.136067	1.04178	-1.99212	-2.10351	-2.25714	-2.54208	-1.86736	0.248651	0.850359	2.1548	2.16566	0.00682318	-1.01255	0.415623	0.563505	0.327458	-0.607983	-1.9091	-0.0843161	1.37812	0.660705	1.59321	0.413382	1.5658	0.231573	-3.04771	1.12914	-0.591402	-1.93728	0.489797
GSM1426173	3.3193	-7.76591	3.49327	5.6986	-1.60037	-6.93467	-6.50767	-2.66933	6.08805	-0.400711	-2.53161	-5.0816	1.12096	-2.58093	1.19521	-1.95213	5.03195	-1.82745	-1.20816	-1.31009	-2.83965	3.98676	3.09889	-3.28412	0.201038	-3.06665	0.0589706	-3.22111	0.932554	0.979823	0.420851	-0.943344	2.91746	5.15271	-0.299663	-0.833447	1.06065	1.26303	-1.83514	2.01232	-1.76513	-0.200362	-1.29317	0.956972	1.64641	2.52366	-1.77068	0.964705	2.12794
GSM1426174	8.65641	-9.7417	10.4394	0.275121	2.3431	-4.61051	-2.11419	-1.5529	0.173195	-1.47227	2.30428	2.72528	1.91006	-1.04082	2.28251	0.606381	1.08466	-0.809983	0.414168	-1.31929	-3.68029	-1.27824	0.147655	3.44876	2.9012	0.676219	0.216867	0.246357	-1.25288	5.33233	-1.85498	1.91006	-2.40888	-2.08428	0.659234	1.87967	-0.786447	-1.80799	-2.1596	1.12235	-0.272748	-0.732958	-3.3841	0.217562	0.125232	-0.0426465	-3.424	-2.21834	-1.09168
GSM1426175	-1.82271	-14.4734	0.434278	-9.1608	-6.60919	-1.54381	2.86735	0.159271	2.15869	-0.565986	2.49115	-3.87045	-1.19824	3.72667	2.52317	2.32117	-0.234399	2.6222	1.54741	-0.963132	0.0587671	-0.147872	-2.54832	-2.23428	5.34164	0.00843624	-4.12948	-0.238664	1.42553	-0.848391	0.0592889	1.24446	-1.42356	1.66282	1.07143	-1.76105	5.56629	-2.82558	3.13328	-3.05114	-1.20057	-1.34869	0.76529	1.4962	-0.0698264	0.667225	0.110434	-0.310945	-1.51816
GSM1426176	9.84229	-13.5409	-1.81346	-6.88976	-7.86251	0.250148	-4.29833	-0.088862	-0.476588	-1.08663	-1.969	2.1736	-0.69488	-4.51603	2.55006	4.36084	3.57534	-0.16937	3.19089	-2.96854	2.85565	-0.11694	2.76863	-1.96429	-3.46082	5.99025	0.681187	-5.29919	1.62059	1.23376	-5.37576	0.724519	-1.80845	-1.18743	0.146628	0.0763707	-1.54559	5.01625	2.21059	3.36473	2.10579	2.87311	-0.312333	-0.31281	1.044	-1.13914	0.336687	0.228377	-0.427014
GSM1426177	-10.1999	-7.34357	-7.13241	-8.28433	-3.15102	-4.0178	-5.53383	-1.96511	3.96649	0.938215	1.69848	-4.31766	-0.969375	-4.19081	5.32072	-1.23161	-0.769258	2.26373	-3.06887	1.86593	-2.73914	2.60829	-1.89209	2.7146	-2.15987	-0.437108	4.84057	3.21141	-4.78867	-1.39303	1.78245	4.12227	-2.82551	0.480757	3.13016	-3.25374	-1.97093	1.73802	-0.602547	-0.154712	-2.8023	0.621518	0.696268	0.0444561	0.940983	0.80422	-0.59639	-0.712802	0.363209
GSM1426178	0.598861	-4.39395	-2.10426	-9.17087	-4.31748	-2.42901	-7.57749	0.295051	3.68414	1.02525	1.58429	-5.61436	-3.47456	0.928057	-1.93435	-0.781689	-5.34099	3.20553	0.206759	-1.97885	0.128323	-0.598419	-0.313933	0.56891	-0.983017	0.330562	-0.17931	0.0536697	-2.69224	1.70142	0.253521	-1.91197	0.768378	1.68409	0.650104	0.362388	-2.42615	-0.958531	0.317739	2.10156	0.348358	0.677205	1.46939	-0.300162	0.194908	-0.252875	1.88256	-0.289269	-0.12133
GSM1426179	-10.8299	-12.2926	-0.873753	-11.0129	-6.0455	-5.65702	9.31668	-0.540048	-6.30749	-4.14703	1.43637	-1.99763	1.70967	6.5463	5.8025	0.691348	2.84037	-5.35835	-1.43699	-4.97387	2.23856	4.22087	-1.48985	4.29878	-2.48148	0.386895	-0.208435	-0.995648	2.0912	-2.6468	0.055624	-1.69094	2.06589	-1.08113	0.289268	-2.41953	-0.519446	-0.426262	-1.90347	-1.70987	1.3378	1.51519	-1.16149	-1.67797	-0.837904	-0.719187	-0.738718	1.18301	-0.746479
GSM1426180	-13.612	-6.08622	-6.50805	-10.1274	-4.20861	3.40536	-3.22587	3.81527	2.94901	-0.499553	0.87838	3.60402	-0.0465575	-1.50967	0.578323	2.10985	-2.27496	-1.10049	1.25516	-2.42306	6.27145	-0.437919	1.2617	-1.52984	4.56569	1.41615	0.201064	1.05925	0.0165862	1.96638	1.54558	1.9213	1.32994	-1.51508	-1.41093	-1.54519	-0.100865	-0.695475	-0.5542	-1.37473	-1.1952	1.86034	-1.88054	1.74948	0.543543	-3.80824	-0.286391	2.03379	2.16879
GSM1426181	-3.5964	-15.5325	-6.98948	-5.19547	-5.61661	0.595632	7.45421	-2.71244	-1.90322	-1.98699	-3.12696	-0.0516188	2.83207	-2.66306	1.47556	4.38841	1.65127	5.09835	0.498683	5.48029	-3.21395	0.728067	-0.526183	2.23191	-0.468817	-1.28555	0.214992	-0.823279	1.75836	2.99957	2.12995	4.62445	0.775037	-3.31121	-0.799659	-0.0249652	-2.4679	-0.946412	2.06925	-0.510684	0.21976	-1.13265	-2.22073	0.118629	-1.32921	1.67986	2.97477	0.126246	1.8838
GSM1426182	1.76625	-10.4213	3.7504	-8.62215	-7.8227	-0.658523	-2.38343	0.871378	-1.34094	-3.22519	-0.307279	-0.915766	-4.15884	-0.164455	0.861882	1.4761	-6.93013	-0.502915	2.28151	5.47017	3.88117	-0.24332	-2.52252	0.574538	-1.86675	-2.4003	0.532285	1.97455	3.8505	0.63145	-2.46213	-1.46054	0.923837	2.60085	1.40849	0.447952	2.20458	3.76901	-0.525157	0.810391	1.15811	-3.96794	0.899232	-0.850235	2.06291	-0.926781	-3.10827	0.546449	-3.54798
GSM1426183	-1.33595	-9.72114	-7.73535	-7.75203	-2.53651	-1.66908	-2.23024	-2.57368	1.39663	-0.451674	-2.13513	0.40541	0.465554	-0.893414	0.0933271	3.04457	1.08318	0.328239	-2.71532	1.31713	2.19394	-2.09209	1.14427	-0.275027	-2.79216	-2.62922	-0.948383	0.812702	-1.77727	1.3327	0.986253	-2.33614	-0.357347	-0.10287	-1.4807	2.612	-0.292844	0.321211	0.257164	-1.97394	-2.13221	-3.35805	-2.3359	0.210142	-2.73004	-0.954999	-0.436398	0.315581	0.406343
GSM1426184	-6.45879	-10.135	10.46	-0.0075924	-8.86727	-7.50644	-3.405	2.40394	2.81914	1.45113	-3.45852	5.87885	2.26178	-1.26269	-1.57041	-7.85279	-2.16933	-4.32203	-1.89874	7.29667	-1.35979	-1.93412	1.96598	4.13008	3.59628	-0.414245	-1.45543	-2.52476	1.70218	-4.70274	-1.52546	-1.33756	-1.66303	-3.06251	1.20445	-3.07626	0.944867	0.341435	0.652279	-0.0828743	0.0602196	-0.398028	1.64194	1.37917	-0.0747181	-1.53124	0.721418	1.98153	1.94695
GSM1426185	-3.77064	-10.2805	3.94705	-3.88903	-5.78967	0.896171	3.33801	8.73223	1.1919	2.10611	-6.05084	4.47079	-5.73229	-1.80807	-0.221768	-1.17706	2.74903	0.207091	0.584277	-3.80713	-2.14809	-0.724725	1.06524	2.06014	-2.41326	0.0957597	-5.0356	1.99775	-3.10622	-3.1596	-0.199041	-2.18826	-2.12711	1.83516	2.60459	3.11343	-1.73377	-0.799241	-3.13616	-2.49672	1.09023	-0.239269	-0.420731	-0.662075	-2.21658	2.02029	1.49725	0.931724	1.34971
GSM1426186	4.51187	-4.33252	7.307	0.251253	0.18282	0.317671	-3.76761	2.7906	2.08914	0.00774185	1.50182	2.50005	-1.25004	0.232171	1.83787	1.23522	0.264547	0.74751	0.800041	0.376414	-4.80017	3.41871	-1.91065	-2.99898	0.895304	3.9075	1.95167	-0.167478	-1.29374	1.73138	0.302852	-1.52811	-0.0747348	-2.64438	0.782441	-1.24039	1.52562	-3.80107	0.39867	-1.08339	-1.77133	0.482117	2.57512	-0.604468	-2.89284	-0.974321	-0.823317	1.93088	-0.81796
[truncated: 59 more columns]

## Sheet: B
Samples	PC1	PC2	PC3	PC4	PC5	PC6	PC7	PC8	PC9	PC10	PC11	PC12	PC13	PC14	PC15	PC16	PC17	PC18	PC19	PC20	PC21	PC22	PC23	PC24	PC25	PC26	PC27	PC28	PC29	PC30	PC31	PC32	PC33	PC34	PC35	PC36	PC37	PC38	PC39	PC40	PC41	PC42	PC43	PC44	PC45	PC46	PC47	PC48	PC49
GSM1426079	118.292	-25.8202	11.5322	-4.05369	10.1265	-35.7161	6.21709	-3.78096	1.15012	-6.21482	8.38577	-0.831996	9.01252	-8.71846	30.4892	-11.1962	15.1485	-17.2909	4.76776	-10.2684	7.98637	-2.49106	17.1625	-11.3301	0.732841	-11.6171	3.8864	-8.51293	7.67415	-12.434	7.42437	5.53769	-8.84406	6.93387	-1.57299	-1.121	-16.0589	4.94605	0.676038	-11.5916	-4.49478	8.77251	4.2652	9.04531	0.478478	-15.2291	-5.65035	-3.56072	9.67265
GSM1426080	21.3149	-82.5977	14.7716	-24.8136	18.5329	-25.0617	-12.8792	-6.69628	-7.0287	-1.11962	4.197	30.8036	-10.1429	-12.9148	24.6342	-10.2675	8.66699	-20.6015	20.0045	-19.4901	15.509	5.37275	22.3779	4.83327	-2.70084	5.91521	-11.2429	1.66234	-4.89144	-8.62156	-15.8838	-7.99352	-18.5083	-6.4512	-5.75014	-16.9212	2.06523	5.78829	-7.66608	-0.726255	-11.2756	10.6786	6.19141	10.2584	-2.02616	-10.8757	23.3659	5.72748	-12.9548
GSM1426081	132.299	-22.5741	-25.9267	7.98629	24.2498	-47.5277	-4.7883	63.1197	-35.4918	22.3079	-11.9189	-9.89929	2.56562	-7.42465	-8.45891	-5.89062	-22.9454	11.4526	6.03403	3.97677	-15.7716	19.3114	-15.2505	2.92852	-24.7968	15.1152	-15.69	-2.37054	-16.119	-26.3998	-8.8534	-30.0566	-4.49345	7.98571	14.8755	0.780325	-3.86493	4.85526	11.2605	2.29955	19.0908	21.2979	17.6923	1.38149	-0.284683	7.99104	11.6029	-20.2549	-3.29149
GSM1426082	83.4431	-82.8565	-11.097	-2.47112	26.4037	-50.1353	15.04	45.3837	-8.67444	14.2803	-9.51129	-5.75194	-8.46109	-12.2561	3.67287	-5.20207	-3.63412	-14.15	22.5088	-15.3728	0.298986	10.616	5.75376	-4.56071	-2.72728	-12.4204	-8.5478	-8.92973	-4.12612	5.50086	22.4365	1.83176	-7.134	2.65879	-2.12537	2.1779	-6.24891	10.3791	9.48285	0.874471	-15.0367	-9.67354	-15.5365	-6.54611	2.9764	10.6652	-26.7621	10.3345	7.62471
GSM1426083	107.11	-28.046	6.57639	4.71157	16.7491	-47.7585	-3.38219	31.9291	-3.88365	12.4506	-6.90897	-15.6554	13.8457	-13.8257	13.1807	-1.30936	-4.65624	9.8619	12.8834	-2.46316	-9.04845	7.40697	-8.07823	-3.1177	17.9826	-12.396	2.8993	-2.50476	-9.60539	-12.2749	-3.55074	7.9499	-14.026	6.60535	-12.208	-9.0818	-3.13166	2.91085	-16.0115	-2.298	11.3736	3.46704	-10.5219	-7.5744	5.59955	4.19429	4.37467	19.9851	20.4209
GSM1426084	74.6344	-77.9881	5.63716	-40.6325	-3.17312	-43.2388	4.7488	54.3377	-11.0518	24.7731	-9.82289	6.18076	-3.11462	3.38832	-2.19489	-14.2893	-19.6701	14.6222	3.07516	-6.81492	-26.0947	-9.66258	0.893601	0.102254	5.65044	0.354767	14.1058	7.11348	8.47329	2.4641	6.48156	1.89109	-10.7355	-4.67176	13.9913	-18.6921	-0.980832	-5.37796	8.17963	0.96259	-3.56415	-23.6488	8.13813	-9.83392	-16.8794	-2.63337	-13.9725	3.63925	-18.405
GSM1426085	52.9039	-48.1001	31.758	-47.0967	58.5018	-13.34	-3.42679	-24.7538	3.61062	-10.3414	13.39	24.9707	4.7345	-1.74026	-3.5401	-10.0808	-1.17777	-8.23424	9.16268	-6.64961	22.6349	-13.3623	-2.74953	2.31611	4.71561	-18.3439	-5.17801	-21.3945	-13.2656	0.438611	-12.0171	-8.62679	19.9638	-4.50474	17.5489	-7.63597	7.804	-7.41356	-11.3635	1.93993	6.4356	-1.35471	-3.45005	16.574	0.749821	-8.85489	-2.20679	-22.2437	2.36453
GSM1426086	48.229	-84.1172	6.09471	-22.2126	33.7006	-47.7386	-16.9802	-4.05732	-17.1311	-2.00249	-4.54972	4.46361	-22.8231	0.187634	7.95595	2.70133	-2.48148	-14.7398	5.6951	0.386338	15.1699	2.63673	2.34048	3.63261	6.50406	-4.97927	9.4766	-5.32066	4.91289	9.48581	-6.95981	-2.88058	14.096	-4.55909	-11.2114	4.70575	-3.42062	3.83467	4.85109	-2.7715	-7.11944	3.35296	2.57372	-2.21016	7.1128	1.31918	-15.3345	-10.7259	-6.02961
GSM1426087	-10.7056	-120.427	41.6503	-40.7482	67.731	-42.9025	27.2633	19.1324	25.3469	29.4663	2.67999	-0.0382868	-7.95381	13.4685	-39.3089	9.44148	-1.30125	20.8651	-8.91977	16.7512	4.95514	-8.28777	-10.0442	-4.36823	11.0216	-7.54722	-1.32552	-23.8184	19.2335	14.9583	-9.51102	10.8419	1.07443	-11.3221	-1.60228	4.98007	13.5269	11.8103	-5.97669	5.03398	3.03557	-10.9679	21.7449	-2.61197	17.1657	-11.9414	22.9392	3.8249	12.3825
GSM1426088	51.0542	-37.1477	18.8476	-10.0961	53.3906	-47.6549	-19.6704	13.1742	0.39277	38.1323	5.90936	10.0759	-6.81389	8.53657	-18.4064	9.58758	20.6093	26.2373	-26.2479	1.16719	-16.9822	-10.9962	4.33856	3.2273	-8.0597	15.1823	8.89517	32.0348	4.93311	-2.78995	-19.0902	10.9597	18.1479	12.3429	-14.1925	13.1547	-9.69518	-8.40764	2.16643	13.8011	5.84399	12.554	-22.0045	8.18823	-5.46906	-6.0099	10.8914	4.73694	-1.375
GSM1426089	45.0822	-80.5067	16.5573	-27.3815	38.8422	-55.7244	5.21082	-9.44433	-16.8252	-8.28874	-3.34682	7.99349	-9.01252	7.16556	-2.48006	-3.93485	2.28627	4.52299	-6.54215	0.337999	14.084	-12.8788	-10.4298	1.5308	11.6709	-0.686701	18.0501	7.65269	11.2973	2.45902	-7.28487	5.29856	6.21806	8.17173	-14.2489	16.169	-6.45938	4.03752	-0.0458893	-6.33872	-2.8168	4.43161	-1.17975	-4.75449	7.72002	-1.34934	-11.0488	-1.37212	-0.736255
GSM1426090	0.260198	26.3428	-33.8312	11.7388	-32.6014	-15.4135	6.06532	-14.4707	-0.520539	4.99655	-2.29608	17.2529	-11.0132	8.75955	-19.4786	-8.37151	-13.7292	-1.65819	-7.69194	3.1883	13.0938	10.6917	-13.0851	4.62701	-4.92694	-0.441397	-1.61737	-3.62854	-10.4428	-2.81627	9.02015	14.5652	2.30913	3.27484	6.65282	-1.19621	4.6404	-0.330382	-8.13666	-1.16751	4.17343	-7.96393	1.01649	0.217056	3.30934	-2.31755	3.89408	5.27916	-3.46068
GSM1426091	83.7976	29.9729	-46.7208	8.25337	-47.574	-15.0574	2.79623	-24.875	-12.2995	-0.332144	6.94058	3.24964	-27.5521	-1.07503	-1.25454	-7.51684	-10.5803	3.70851	14.6306	10.2224	19.6711	0.0722956	-4.87296	9.03263	-0.195613	5.61295	2.82164	4.26483	-10.7015	6.13963	0.121898	4.22633	2.99881	-10.7372	-5.65304	8.55571	0.403909	3.18466	-1.81049	4.8544	-7.73367	-7.00557	9.8351	1.40425	4.77409	0.502547	-0.899725	-3.73678	-3.58049
GSM1426092	102.92	18.4333	-38.7047	-11.1128	-37.0889	-8.87698	9.71941	-19.8232	-17.2694	-2.88699	20.953	0.955522	-16.9262	3.73354	4.54199	-15.0232	0.360347	9.73946	-1.75788	-0.423169	14.2172	-5.91077	-12.5901	7.27089	-10.095	9.37709	7.42291	15.7975	-3.32294	-2.28413	-1.19973	2.3632	9.19666	-1.39258	-1.66418	8.36187	-2.93657	4.13188	1.76578	-6.94888	-5.88262	-6.98722	2.39058	0.228678	-4.05339	-5.70433	-4.89149	7.67122	-2.33912
GSM1426093	-6.96757	13.8108	-34.8428	11.2627	-19.2555	-10.6916	7.55893	-27.6164	2.17346	-11.6419	-22.5269	6.55354	-17.8859	-2.80195	-0.496556	-23.7344	-10.2652	1.5927	-5.07513	-3.82571	1.24706	-15.1685	-7.47174	2.13344	2.03313	-1.85776	-1.52515	8.31905	-4.75735	-4.13341	-0.802858	7.49088	3.35251	1.11846	-0.626443	-3.76264	-9.93952	1.40112	6.84859	-0.423849	-2.79897	-0.465137	-6.39141	0.0200076	0.219995	-1.23932	1.23925	-6.94199	9.22772
GSM1426094	-51.7489	167.308	95.2228	-31.5283	-32.0056	-33.1046	11.3188	6.50938	-27.1011	-23.6024	-9.23896	-13.3519	-31.2644	-7.29138	5.05091	-3.38971	-28.5128	-18.4662	1.01562	-22.015	4.22613	-3.81066	-35.3202	9.67615	17.4243	15.6559	-0.702438	0.0602399	13.782	-1.37213	-4.7903	0.337286	-1.81645	0.580184	-3.6054	3.28075	2.30707	6.57344	0.169344	13.4163	-3.17019	-6.44935	11.1257	8.18291	0.788588	5.565	2.46585	6.09062	5.25978
GSM1426095	-29.345	118.306	45.1306	34.3582	-18.0643	-55.0902	5.87458	6.69574	14.4841	-14.0882	-6.27219	-22.6646	9.19348	3.98763	10.0192	-18.6797	21.3293	9.68742	-0.0985191	-1.61164	3.2666	-9.94412	-2.48835	12.8825	-9.69409	6.199	-11.0655	0.664777	9.32788	-0.86772	19.7024	-9.29453	9.25921	-5.36879	-7.37027	-14.8475	13.9164	5.48583	0.824749	16.9238	6.12482	3.73327	-4.59537	-4.11409	12.765	6.75307	2.20406	5.71559	-8.41003
GSM1426096	16.7184	70.3423	-38.868	54.3116	11.4337	-23.7783	30.4665	18.9188	0.936914	-1.10905	13.4839	26.9008	30.2157	-12.357	9.20982	11.7166	28.6262	-4.34885	-19.7059	27.3026	2.63733	15.6316	-2.77467	-1.40633	14.4431	-4.31095	-0.187667	3.10314	-2.28044	-3.69325	-0.815965	-7.21452	3.53403	-7.99132	-2.21114	-9.66018	-3.34276	3.46535	-5.88391	2.62462	-8.01649	-1.90085	1.62543	7.58371	-7.57766	19.7957	-8.81319	-11.8925	-3.14772
GSM1426097	-58.1579	8.10435	-12.3786	-13.0018	-30.1832	-21.7164	43.2923	-16.9769	-13.7092	36.7972	-7.03183	-6.91177	2.35882	19.3052	5.68071	11.2072	-2.67476	-0.0348977	-5.20648	4.0761	22.0463	9.76657	9.15791	11.2659	-8.05857	-16.2891	-11.3334	8.34697	-0.393825	10.8692	-2.93916	-10.978	11.8917	1.17537	3.52911	1.75892	-7.40277	-0.575749	0.64741	-0.520738	-0.68355	4.84027	-1.30533	-2.23957	6.64338	8.43203	1.82297	11.6058	-8.2506
GSM1426098	56.81	129.394	-41.5231	27.0146	54.1801	4.4732	31.4746	-22.8085	-6.76863	-0.505481	10.6431	18.0204	-19.7839	37.1096	-8.56359	-14.0215	2.2594	-3.76532	-25.4372	-4.74626	-1.83118	10.1756	-15.3051	8.7832	-1.40574	-0.411334	15.776	-17.074	-1.25077	-0.603665	2.35742	9.37678	-7.95745	-5.82531	13.8405	-10.0995	-10.494	16.3673	3.57386	6.52283	8.5978	2.41558	-2.07062	4.02168	-1.19807	7.28699	-0.208704	3.55304	-5.5478
GSM1426099	-93.4141	-39.6241	-54.3411	12.4237	-0.5044	-10.7725	-9.46436	21.1184	-10.6002	-20.2433	-2.98276	22.3943	15.1813	2.40142	1.4823	-10.5169	0.385785	-29.519	-1.37623	6.72318	-6.14464	16.9265	-13.0851	-0.0876673	-9.85317	9.86879	0.329036	4.40876	9.0197	-0.118749	-15.1017	-0.0367511	2.36111	-6.75312	-15.0846	10.3887	20.5165	-5.01743	-7.18408	-6.24836	5.98549	-4.26152	0.845566	-9.0068	-1.5133	4.04704	-3.08152	10.6744	-0.291036
GSM1426100	-103.296	41.0311	19.4126	-2.99386	-1.74799	-30.3659	-4.39751	2.62792	-5.2501	15.5247	9.79868	-16.8209	31.059	19.6553	21.4016	-22.3129	8.9619	-19.5694	19.0455	16.009	-10.1079	-3.6879	-12.6515	-3.12278	-3.9365	7.92578	-3.9817	-9.92659	5.15727	-11.2051	19.8491	-1.56801	15.4916	-3.43546	-7.08342	1.15337	16.2115	-13.6499	-4.09405	8.53251	3.86449	-5.71518	-3.18466	-7.42355	4.7841	-2.13754	-6.24575	0.0511053	9.75575
GSM1426101	-4.82239	120.613	-7.04611	-10.8884	28.1799	6.15297	-58.8424	17.8877	-16.2333	-10.5337	-4.78296	42.055	-10.6367	14.998	-9.36846	-16.8654	28.2954	-0.810718	-25.2231	1.8301	0.167003	3.0307	7.96676	7.84576	-20.9159	-21.8433	3.87093	-28.1037	-10.3005	-3.50334	-0.225091	15.2798	-15.5044	-4.41699	-1.63547	11.2672	-0.964567	-19.6745	29.0562	19.2008	-13.0406	1.3766	5.03863	-11.7602	-5.32671	4.01276	3.21432	5.62594	7.77105
GSM1426102	-44.6288	-50.3732	-26.7443	-12.6473	-38.9607	14.3784	31.4667	-18.4931	-6.66909	16.7222	15.7218	-6.65416	-10.9943	10.0903	14.8125	0.372049	16.1994	18.4844	10.398	6.65711	-10.4206	0.441313	7.90336	1.33734	-2.33612	-5.16564	-12.9508	-3.16929	-1.57887	-0.424452	-11.9167	-1.6656	-4.01917	2.32708	-6.96053	-5.12575	9.26899	9.13081	13.7582	4.18448	-0.644614	-9.97053	3.31986	2.9327	8.712	-7.37092	8.12052	6.19417	1.24127
GSM1426103	-79.0261	-25.4708	-46.0914	6.03014	-8.98292	-6.1423	26.6227	-7.97364	-16.7211	1.4144	0.25169	-2.22634	5.43754	13.295	7.04962	-7.78094	-1.06944	2.69888	4.28207	-19.0783	-5.86844	3.74339	12.0492	-2.91503	-13.507	-6.15622	14.2555	0.937659	-8.35037	17.5231	-3.67595	2.5252	0.0151412	7.16949	3.96881	10.421	1.06489	-7.11998	-1.04576	-1.31861	2.59163	-3.10826	-6.27621	1.25928	-3.92988	-0.999902	3.07702	-0.971998	13.5603
GSM1426104	-85.64	-14.8795	-35.675	-2.69654	-18.8352	1.27764	26.6073	16.2513	-23.4277	-12.0186	-10.4831	24.7635	13.1788	12.7746	-0.975038	-1.51793	23.7424	-0.276049	-10.2481	-5.60569	-9.87486	-1.82137	-2.59988	-3.66823	8.34108	5.04819	-0.116927	18.0887	-12.6541	10.7773	-17.7166	-11.6281	1.21683	-12.9635	3.95651	-10.5562	-2.05607	3.97864	-5.11712	-8.08773	11.6506	-2.8706	-7.56225	-5.84233	11.4602	-0.25916	-4.01419	10.2039	-2.66995
GSM1426105	-138.75	-1.87009	11.1155	-12.9601	-3.96152	-6.35012	34.8777	12.2241	-19.8348	16.3482	-6.23647	-20.3744	15.7035	31.9495	8.57109	6.1014	9.12405	-12.7181	-10.9548	1.30614	7.74643	5.58813	-2.51512	5.8904	12.4957	-8.60088	1.35459	1.67284	-4.8839	6.88695	0.196376	-14.6341	1.37471	-10.6745	13.4473	1.15561	-10.6009	0.627744	1.56764	1.61325	-0.628706	10.9904	-4.58658	-0.140741	-0.534787	6.41142	3.38482	-1.57271	-0.427192
GSM1426106	-40.7099	-42.0143	-40.354	25.2639	-27.5335	16.1587	-13.6433	14.2665	11.5976	-7.2121	22.7271	-40.9504	-12.2743	-5.18342	21.0702	-9.62045	0.519767	3.4519	-2.14585	-10.2316	-6.56857	-2.55449	-7.98703	-0.023588	7.06127	-18.1721	-12.0273	-8.05233	-1.09025	-1.39218	-24.4653	-2.25154	-6.66538	-3.09925	-1.03514	1.92482	0.536271	1.53898	8.00837	1.06209	0.306731	-3.80861	4.02518	5.90286	-1.02859	12.1511	18.6084	-1.72351	9.05695
GSM1426107	-80.8547	1.51036	-18.7627	2.89241	-19.5646	1.52295	21.7718	2.15382	-17.621	35.0452	-5.23165	11.751	12.0718	-2.95606	7.75117	-15.5927	-5.60218	-0.659558	7.11479	-12.7425	0.0118941	1.6456	6.40992	-7.56263	1.87382	-5.51466	-5.13568	3.49265	4.47982	1.31867	2.31234	1.58271	2.03385	-4.10499	2.22514	8.41479	-6.11878	-4.32876	-2.28189	0.849652	-3.59219	-0.618485	-9.52609	-4.97023	-1.42286	5.06512	5.5411	-3.64367	7.06651
GSM1426108	-74.9647	-55.9444	-70.7206	-2.67179	10.6617	15.4809	27.4426	29.2196	6.60597	-27.8401	-19.4725	25.2962	31.9124	-6.17418	7.95715	8.68391	-10.7383	-29.7857	-19.2952	10.0221	-1.05145	-3.639	-12.6904	3.16187	0.523288	-2.51493	-10.6174	9.04951	8.17187	2.53301	-3.9068	10.6549	-9.05113	-7.18059	-14.3205	-7.15166	-4.85623	-10.1647	6.32672	-5.388	2.9609	2.04377	15.0364	-0.951855	-4.22132	-11.7192	7.74159	-3.56905	3.8013
GSM1426109	-30.1223	12.4212	-26.8572	15.5357	-33.6333	-1.86292	4.50283	-9.3312	-3.00708	5.70958	9.06747	-15.781	-5.59655	2.38751	11.8434	4.42306	-2.06288	16.3124	-8.13775	-10.7964	-15.5951	-5.27653	-11.9996	6.03185	-1.01745	-10.6292	9.2467	-6.01157	-1.35098	-7.48183	-10.3476	1.35692	-4.24853	4.562	1.19496	-13.0801	-8.13532	0.149223	2.17815	-1.7843	-5.13699	5.93931	-2.37448	1.73735	-5.99866	6.70669	5.90232	3.97646	4.0686
GSM1426110	-85.7979	-112.665	-62.6819	-9.07623	-32.3368	4.30624	11.8955	35.8976	9.04947	-2.23211	32.829	-8.03278	-20.0342	-2.45882	-6.22826	5.2067	-5.01905	12.4415	1.29768	12.3068	5.86062	-24.4638	-20.2284	20.4381	10.4042	-10.3059	-1.95678	4.88816	-5.01009	4.87884	13.4853	-1.69422	-8.02474	3.25129	-5.21983	6.89421	-0.37245	-27.8914	-15.6803	10.5753	-8.73851	14.0152	5.41647	8.01811	-5.36462	-3.73239	-5.5488	-17.6423	-7.64466
GSM1426111	-47.8114	-23.9493	-37.2677	-13.0542	-9.85792	18.1927	11.6857	-7.01389	-26.5336	13.3281	-1.97722	16.1741	-6.1067	-10.6913	2.50741	-11.6081	-18.0009	7.05553	9.84751	-24.1773	-6.08395	-0.499536	3.07707	-2.09123	15.5209	-1.14142	-1.05854	-1.30932	-8.16334	3.31656	-8.13355	4.17009	-0.0989641	2.29466	-4.51298	1.01116	-5.36987	-3.5242	-4.45379	-0.168596	-0.539195	-3.79484	-3.03428	3.75953	4.83871	-1.54459	7.33477	6.88221	1.60461
GSM1426112	8.26351	-14.7673	-8.73181	89.5604	2.89022	22.0828	-23.5297	30.0657	-29.2535	-3.49451	-2.84702	-18.8038	-2.16772	-8.79221	-29.3028	-8.3526	-14.1348	4.02848	-12.0451	0.197194	18.8375	-1.48758	16.6973	-14.1945	-21.2353	-4.71604	1.26234	-5.13676	-1.83093	-7.8685	0.713194	10.7605	-4.37145	0.391795	-6.84961	-0.308183	8.28997	-6.47502	-27.6261	1.73707	9.94074	-7.80045	11.9605	11.2502	3.91078	-7.46476	-4.29188	9.88973	-9.19849
GSM1426113	-33.3664	-16.3315	20.2748	71.1013	-20.3499	16.8054	-16.5951	-7.74571	-18.3411	19.3392	18.327	-8.24395	-12.5004	-7.60504	8.77568	0.96049	8.06712	8.33704	6.45939	-0.226416	3.79217	-9.50159	-2.99792	-8.08768	-8.43227	-4.26077	0.135198	6.65102	-13.4514	3.49563	0.882002	-0.306289	-7.91809	-5.64187	1.91023	-9.42601	9.44781	-2.42055	5.34912	7.01862	4.1531	-12.049	12.14	-0.620031	-0.530797	-5.78292	-0.382695	-3.77931	3.57727
GSM1426114	-69.539	30.4185	36.6152	52.2193	16.4294	46.5115	-7.70442	15.1674	-54.6794	-0.932554	-38.3607	-2.78238	8.82221	6.27101	4.50378	-24.0339	-14.8519	-0.666905	-7.55802	8.24259	-2.7616	-17.4709	13.3257	4.42398	18.7673	3.7483	0.355099	-7.08792	-11.333	-1.32273	1.00703	1.57356	0.822249	-8.23363	-14.3375	6.16664	-18.516	6.43286	-2.65756	7.99804	-4.93853	6.45951	2.44857	-1.24103	-4.17339	-19.3441	-3.56509	-8.96242	-4.0773
GSM1426115	-59.6906	15.3242	8.35394	45.5494	28.2011	-41.1606	-8.33065	-9.46426	16.4682	8.11737	30.7023	8.25958	-13.3571	-9.37633	4.06216	0.172772	12.2097	-6.26565	-3.81326	18.3895	-0.932071	7.90495	7.33425	7.54196	9.52838	-6.69222	-13.1592	-10.5854	6.26074	-8.42139	2.90773	-6.44123	9.92977	6.43128	-5.19416	0.860233	3.77167	12.9639	3.75979	4.98111	0.264326	4.17585	-9.63783	2.78125	0.512004	-1.41364	-7.96291	-4.82117	0.471199
GSM1426116	-95.1333	-20.7403	30.2147	83.3103	-7.41268	38.8128	0.723042	25.2406	-8.19535	8.5919	1.1341	-7.91824	-13.2068	7.99647	2.06163	3.23308	-14.4403	0.591804	-14.6649	17.303	17.6466	2.94626	22.3233	-1.6942	23.5717	0.148038	-2.12023	-4.3368	-1.44478	-14.3962	4.62734	-2.91037	6.63593	22.6627	-2.4197	-1.61334	-10.4534	1.2372	4.84909	9.39962	8.33544	0.881369	-1.48689	-4.46987	-6.60685	-12.8757	-6.56923	8.81099	2.30506
GSM1426117	-24.5989	-58.1837	-2.56379	25.4591	25.43	30.7085	21.1203	-7.03232	-1.34117	4.44942	7.10114	-12.1125	8.29865	-43.6248	-8.04167	8.08621	0.366554	-18.1686	-5.51651	6.511	-9.6006	-24.0444	-6.93695	-22.1278	-8.5468	4.05288	4.48398	-8.01865	2.83039	-14.9357	-16.842	16.1096	2.42128	-31.8196	0.994064	-6.29347	8.59752	12.0537	17.9645	12.0377	-10.9123	5.05631	-20.6161	12.6397	20.8168	11.8082	-5.42195	4.65201	-18.054
GSM1426118	-75.6087	-23.8661	47.8087	3.23974	10.0408	2.91749	14.9464	-30.5969	-18.9723	41.9551	14.2162	-5.45364	36.0096	-9.91012	-12.7843	32.5545	-19.057	-9.40348	3.64923	-16.1275	-4.46613	-0.0020218	-10.9421	-1.43996	-4.6145	7.10635	4.2103	-11.0332	-8.14346	-14.0248	5.22792	4.04518	5.79203	-8.06614	5.01695	3.90722	-9.94697	-3.42657	-5.92916	4.47605	-27.4181	20.5398	-2.31977	-2.63267	-1.85333	-9.4394	-4.31743	4.44306	15.4635
GSM1426119	-30.8504	13.3322	38.4976	53.2525	17.1256	-2.14523	11.1824	-39.8671	-13.6449	-0.291077	-4.88393	-19.7361	-4.0107	-16.998	-14.9863	-5.15007	-6.35801	-2.48958	-7.12635	-5.37994	-4.38354	3.53166	9.9807	-6.28642	-2.28422	15.4414	16.5014	2.98217	0.896067	6.92358	4.77095	5.09972	-1.18216	9.40515	-3.52168	0.662589	13.6432	12.762	-0.688068	-14.275	9.58497	5.87514	-3.10831	-8.59434	-5.22501	-5.76491	1.17379	-5.13718	1.57305
GSM1426120	-10.015	-18.284	37.6903	20.7188	18.0926	1.83592	18.6166	-45.3823	-11.8525	22.9853	21.1161	-27.2874	5.8181	-16.2685	2.0853	6.04542	8.07364	4.14999	-5.18871	-2.19052	-5.41445	-9.03039	-8.94852	-6.84829	-11.615	-7.43557	2.96652	10.5147	-13.9933	3.48176	-8.16371	3.81327	-12.0353	-0.797978	14.1067	3.02869	16.4106	3.3751	4.73599	-11.5925	4.35587	-4.95126	-4.68997	-7.87395	-13.2164	-10.8795	-1.46592	0.995474	-6.64746
GSM1426121	-73.0161	-28.9732	7.25114	36.098	16.3892	19.9291	27.3535	-16.2502	-7.20502	0.720042	18.803	1.10482	-13.2425	-25.204	0.760987	-1.72115	-34.6127	14.6803	-10.6565	2.69678	-3.47232	-7.43219	1.85616	-0.207553	-11.0964	3.25176	7.09679	-12.1713	2.99329	-14.9915	6.08045	-12.6194	-0.311149	6.64288	-0.98145	-2.60519	7.0737	-5.70696	-0.0462178	4.36588	1.17505	-0.663565	-5.14178	-8.87346	-3.59741	2.80367	-1.57771	-1.14748	9.20175
GSM1426122	0.905507	-1.0962	-19.6262	17.3281	-5.43146	-8.36666	6.03722	-22.6996	-5.25065	19.9288	9.2496	16.3137	-18.702	-19.3264	6.70383	-0.0230409	6.62691	9.95157	10.2872	5.24875	2.25516	4.78054	14.1768	-6.8321	-5.13222	3.03099	-1.8392	0.980646	3.46651	1.40135	2.2514	-7.78153	8.51677	-5.49051	-21.6612	5.21092	2.21203	0.193475	-3.50099	-4.10243	-5.83405	-3.27111	-0.143384	-5.81206	-17.8205	7.4058	0.408514	-7.41611	-3.71013
GSM1426123	48.6488	76.5371	-46.8236	60.3956	27.0577	-28.655	14.6907	-6.56195	13.1005	-17.6754	13.9365	31.6125	29.0532	-13.9694	2.72284	-0.425229	-2.35273	14.2274	-3.66746	-3.57439	-20.2098	5.18029	-4.87815	-0.206394	3.77847	-12.8404	-12.3295	-5.61843	-16.6432	18.3155	12.4991	3.59511	-0.344133	8.26604	3.59745	2.5779	-4.50424	4.12908	-10.694	-7.56764	-1.54752	-12.1755	3.67551	3.075	-4.01379	-14.5312	3.77847	-6.38458	6.62642
GSM1426124	-127.979	-45.2944	8.32787	23.8287	6.23226	-45.8706	-17.1026	-12.4337	4.70596	22.4887	24.7291	26.3272	-19.6423	-11.8384	-13.5478	-3.40977	-2.70513	-17.7373	-5.07283	-1.52454	-2.13708	17.505	18.2888	8.76836	-1.88976	10.2271	-12.183	7.89504	8.23096	6.02754	10.1938	4.98039	-4.0815	17.7559	17.2035	-1.917	9.91623	2.832	-4.60173	-4.11321	-4.01332	3.61793	2.99132	-7.35166	-1.39469	7.15523	0.732235	1.30367	-8.74993
GSM1426125	-1.38729	40.1556	-18.1398	21.966	8.64896	-17.873	-18.6364	-12.0736	15.9992	-12.3804	-7.62883	23.1268	13.7637	-38.7857	10.8119	7.71903	-7.74998	14.233	6.17489	-5.62833	-1.97928	11.9639	5.22972	-6.73389	-3.58085	-2.23116	-14.822	7.33606	-6.99705	5.62377	-2.62596	-1.34718	4.52876	-3.97075	-2.81376	5.94993	1.55345	-3.6361	1.67095	1.25442	-3.70845	-11.9642	-0.038241	-0.710498	7.42022	-2.99337	2.36055	-0.379665	-3.04243
GSM1426126	-50.6923	133.43	44.2527	-70.7419	15.9407	31.9137	50.0804	47.5207	0.714636	-24.6436	9.02714	21.2639	3.54365	-11.9813	16.5215	14.2876	-3.23235	16.1243	15.6349	21.2588	21.6869	13.8633	-5.82742	-33.4564	-3.76135	-5.04618	28.975	20.2528	-10.501	-0.290126	-3.91587	-5.26768	8.50563	29.6708	1.61618	-14.0263	22.3406	7.80983	9.5382	13.1751	-21.0015	8.85058	8.55873	-4.24793	1.76343	-9.3839	5.54033	-2.20565	-0.205339
GSM1426127	5.89165	31.6392	-43.4004	-40.4299	60.0082	74.8917	-29.4343	3.99752	14.6031	25.4256	-2.87698	-20.1404	3.54137	15.4795	-7.27136	7.64023	5.10406	-4.34503	6.02792	-19.0613	-3.17456	10.1909	-14.8571	-11.0464	-4.18496	-8.59597	-17.1083	7.42572	7.01729	-6.45176	-1.72023	14.3315	14.7631	14.3192	-14.7865	-27.8092	-22.2314	8.99221	-15.5823	9.44426	-2.72843	-13.8186	4.48234	-16.2094	10.9473	4.70845	-3.68451	-14.6165	-18.7042
GSM1426128	-2.74596	63.2194	-12.8296	20.0118	18.0592	2.27813	-20.0592	6.12971	9.93925	7.349	-5.02093	8.92612	20.5244	-17.0259	-2.28337	9.71118	-1.33258	11.7639	-5.13696	-34.1808	5.48169	12.8805	-1.77036	-4.47169	18.1814	5.51286	-4.92396	-1.81648	7.46661	8.67384	2.92819	7.60401	4.10457	-2.32955	12.4971	2.1838	10.9398	-7.08328	-0.527442	0.880687	2.9491	-0.561092	-1.5009	-3.42277	-0.949404	-4.12141	7.02029	13.3046	-2.26059
GSM1426129	-48.9876	32.8112	-26.9501	-29.3912	77.968	50.4705	-32.112	-1.2835	17.6892	0.435846	20.3258	-10.9526	-24.243	16.5005	2.00096	5.17299	-14.0424	2.47744	-4.77074	-14.2252	-5.02451	11.1102	-13.2483	10.881	7.77452	-2.75182	5.48911	-16.2224	-11.984	-2.21196	3.37371	-24.8121	7.37768	14.5485	-15.9127	-9.88702	6.12429	-6.17524	13.6676	-23.2655	4.11836	-10.7876	-13.2536	15.474	3.622	-10.0634	-9.90076	13.961	-6.58607
GSM1426130	104.598	65.705	-47.8292	-6.10331	12.4889	35.4632	-3.57397	-9.98671	15.7617	16.9223	6.19537	1.34045	-8.6112	-24.5438	18.124	6.69565	6.2377	7.69477	1.7153	-16.6175	5.6932	-6.70191	12.3694	5.1792	23.2093	5.26981	5.24884	1.22832	11.2966	-3.57528	9.191	-4.80339	21.6303	-3.97681	9.77251	19.3759	-0.795373	4.73021	18.0554	1.3236	14.3513	1.90329	13.6817	-17.6939	3.32254	7.52372	10.5782	-1.56036	14.3088
GSM1426131	-50.2152	68.0426	28.2005	-43.0335	17.803	-4.28486	-40.9034	-31.998	-0.044963	31.9359	-10.0268	-3.14392	12.3875	19.195	10.3705	23.2931	-2.72217	-17.7481	3.9385	2.11072	-4.96888	5.48088	5.52652	2.63851	5.37357	7.46242	-6.09326	7.65919	-2.22137	3.87745	11.5539	-2.27846	-16.1747	4.39966	2.4372	2.37635	-2.34754	2.31117	9.46348	-0.634445	3.04893	-1.10485	11.1574	3.4551	6.45054	-14.7442	4.78521	7.37728	-8.99617
GSM1426132	-18.8909	114.729	61.2023	7.26661	-9.71208	-37.1242	-23.1586	2.03351	18.4212	13.1848	-5.25291	-4.52573	22.1732	-23.2324	8.89257	-8.58176	3.91947	17.1816	8.61052	-4.69254	-4.09652	-20.0652	5.59588	10.2571	17.9755	1.73921	0.640703	0.176434	5.0352	10.171	3.89322	9.46005	2.56885	8.09665	4.00621	-12.835	-4.78001	-16.1115	5.5674	1.86651	-2.33518	1.39215	6.68376	17.8041	-5.54073	3.16203	2.4407	1.54687	-19.5792
GSM1426133	-84.799	-45.1186	-26.2552	1.77574	13.0096	16.3649	-21.5552	8.69191	14.1071	1.50491	1.37067	15.1185	-18.4577	-20.3586	-9.50891	-11.0946	-2.72515	-6.23963	-5.17091	-22.8098	5.74341	7.27245	-2.16446	-17.6282	10.7737	14.2617	0.219644	2.34545	13.1324	-8.12673	9.69393	4.82378	3.91955	-0.803955	7.13421	0.410613	-1.88027	-11.5367	-5.38681	-0.402523	1.29224	7.96249	0.0404404	-2.42674	-1.27666	15.9536	5.50854	-5.39019	-7.12981
GSM1426134	-42.7712	10.688	-43.5523	-8.65855	11.8711	30.6114	2.50626	10.6829	-11.3508	18.4846	15.0799	25.8472	-9.7101	-10.0707	8.66632	13.106	17.5549	11.2799	-8.79227	-2.46062	-1.49547	-0.43124	2.54826	-6.34369	34.2415	10.9397	12.3545	10.4623	-1.19047	3.37585	9.84441	-7.647	-5.47569	-21.3772	8.39616	-4.40999	-3.06397	-7.51798	-4.94653	-2.89846	14.4764	-1.60006	3.34273	5.30433	6.39472	3.96479	-7.40105	-5.18455	4.32851
GSM1426135	-70.5882	-56.871	-30.5363	-7.90865	23.6659	11.329	-38.7747	-4.98891	16.4483	5.56777	21.3653	-14.5609	-25.769	2.95732	8.6887	-7.38775	16.9492	-7.75347	19.7716	6.4828	-3.83236	-1.86154	-2.01517	-0.920866	-1.65106	3.92848	-1.21256	7.22506	-5.74357	-0.586062	-2.50998	1.67309	-5.52039	-2.90713	-12.6843	3.41722	10.4547	-5.46331	0.812787	-0.469891	0.800124	-1.21045	11.3576	-2.22944	-6.68715	-2.50365	-5.52913	-8.73608	2.95763
GSM1426136	122.418	111.261	-59.6769	7.93731	-20.9254	21.9233	6.06651	0.558724	-1.23766	6.92967	-15.6844	-4.50878	8.39997	0.223097	13.5516	1.72247	-24.3044	23.6936	-6.07303	11.6838	12.679	7.43197	12.9547	25.5094	5.95301	-2.11983	2.33983	-21.6247	15.4483	2.47711	-11.3668	4.77062	-12.1464	-2.19039	1.62206	2.32517	14.8902	0.35813	-7.77939	-17.8033	-20.7651	22.0572	-7.10055	-14.9404	9.88697	2.54474	1.61911	-0.746951	-20.8612
GSM1426137	19.8398	6.6427	-71.0683	-1.97784	71.9399	19.8917	78.4259	-32.544	17.3977	-15.1649	-5.61188	6.82599	-5.73686	26.9598	19.5628	-23.0393	-16.8821	0.441163	30.4523	11.2518	-23.0867	-16.3067	9.4955	-11.9412	-16.9333	11.7769	-11.5781	0.756686	12.1775	17.6423	8.06568	5.98715	0.39087	8.27671	-3.81814	5.03128	-9.87411	2.76694	-6.37751	18.4521	5.70031	10.8078	9.04507	2.27318	-9.26889	2.95738	-0.715393	15.6249	-6.49342
GSM1426138	-97.3854	-16.1459	-6.89779	-7.9753	14.1456	13.496	7.57958	21.189	41.1878	-18.4528	-21.9388	-17.3999	6.63661	-3.32463	-15.845	-10.9583	3.95666	26.6587	-15.1467	-21.6336	4.71663	-16.1703	2.18423	5.26097	-6.39536	-1.87337	-17.9687	-0.0560882	10.0716	8.04591	-14.8767	-11.9249	4.82877	-5.47948	8.36419	-3.53388	11.0929	12.2791	0.369136	-15.0075	-10.6659	15.5302	20.3175	-1.1235	-14.9246	4.36933	-37.6911	10.6188	9.38974
GSM1426139	-70.6362	63.1774	27.2701	-12.9735	8.18907	1.63402	-29.3181	29.8482	6.69913	-4.71981	-0.13851	-6.24865	18.5893	3.71148	5.93903	-8.63598	0.653405	7.07244	10.2176	-3.37433	12.2332	-11.6648	-0.549244	-21.55	-4.07065	-12.2522	14.6278	-3.69532	4.20413	11.5398	0.21725	-8.92025	-18.8855	-1.1307	-0.225974	21.4495	-3.55474	6.74506	-2.65011	1.09735	8.54226	7.90304	-5.79658	23.417	-9.48354	2.24983	5.8109	14.9638	-13.5418
GSM1426140	-39.501	45.827	-12.7653	-46.456	3.69822	13.7737	-24.5034	0.142704	-2.42906	28.3087	-14.0765	7.04071	19.4047	6.75683	-7.24447	9.03801	-7.49623	3.43612	8.42399	-0.165707	11.0776	9.98168	3.57298	-3.75254	-14.4657	-9.68555	2.82928	0.503171	2.48836	4.92703	-8.78918	-5.57795	-4.02404	-1.54323	5.37646	23.0449	11.0097	-4.64928	-10.091	-0.692665	0.988224	-8.06007	0.363966	-0.889791	1.73634	9.00004	-10.2995	-0.408501	-6.95075
GSM1426141	42.3243	38.8826	-54.1485	-8.53923	44.2738	37.7559	-28.1749	-1.73503	9.86129	20.3787	-1.55697	-9.01648	-25.1701	10.133	16.489	10.884	8.23089	-4.50728	-1.39675	16.3996	-15.5549	0.99631	-2.85156	6.33056	-0.315394	15.6088	0.236015	14.148	-4.17415	-10.6271	24.406	-3.17891	-8.4669	-20.516	-5.52367	7.93363	13.2769	7.85462	-5.36537	-6.42398	-10.23	16.8855	11.3761	7.77787	1.9196	1.09582	3.94937	12.3084	10.9193
GSM1426142	-147.515	6.93444	38.0893	-27.2983	33.8221	7.52289	48.2641	41.7992	46.3963	-22.7185	-0.230507	-38.3348	9.55565	-13.9884	-10.8136	-18.8679	28.3181	16.776	17.8232	-5.77896	11.2407	21.6588	22.889	38.2961	-18.0698	21.0831	22.9169	-1.23194	-18.2417	-16.4111	5.97739	14.5298	4.95622	-18.1395	1.66204	8.09173	-22.4105	1.69116	-2.7712	-15.024	-3.39019	-13.6151	4.38282	-0.586989	6.40445	-5.64359	9.62909	-5.9264	-1.16673
GSM1426143	105.003	28.9556	-39.5454	-22.4875	16.599	15.1382	-19.1319	0.0359644	23.0453	-2.81358	-9.60534	-18.8403	13.6669	-9.53989	3.88227	19.0117	1.48926	0.997549	-0.0560827	7.70687	23.4254	-9.88517	-13.8949	-1.86397	-10.0042	-11.2643	-1.48892	13.7032	-4.89611	-13.4913	16.7425	14.4538	-7.37072	2.80838	15.3173	4.11311	-0.682525	-9.16203	-17.1711	11.8679	7.26293	2.69727	-11.057	-3.19459	6.03618	-1.38719	-6.24851	6.90042	12.5635
GSM1426144	25.7034	37.5775	-53.6652	-33.6266	-9.16671	18.8087	29.4899	-16.4066	-0.0072327	29.3013	-10.2237	5.56187	21.1916	1.90866	2.22005	2.90089	-7.7174	5.38676	18.3251	4.74161	10.1007	0.902486	9.883	14.9434	-2.06927	12.2613	0.14949	2.29994	6.4727	-11.047	-18.9996	26.53	-18.8778	13.1468	-2.44432	-4.72673	9.20162	-12.7653	27.9687	0.292048	24.2343	-3.79943	-2.04977	18.7849	8.60128	4.30767	-25.9046	-14.3637	9.18964
GSM1426145	-112.016	-30.1233	8.38839	23.7601	-32.831	-20.4517	-31.3251	12.1239	52.3621	12.2067	7.80641	9.9424	-7.78188	-4.04528	3.40776	3.40936	-14.6161	-21.4403	3.36896	27.004	-3.33046	-15.0293	-4.74866	5.22226	-5.62082	8.31606	22.0455	-6.41687	12.3673	5.75371	-6.00137	4.77012	-13.6656	16.3421	14.5704	-9.16281	-14.8566	1.86171	7.72168	-11.5665	-4.62323	-0.563868	-2.85329	-8.50359	4.00574	2.98344	2.567	-2.16413	9.0134
GSM1426146	-57.46	51.6238	4.18545	-47.7511	13.0624	22.1359	-23.1203	-10.8618	-0.938781	4.40377	-18.4865	0.764558	-7.73885	0.678884	1.60932	-14.9775	-16.2305	5.05917	5.35848	1.28575	-1.25824	4.64429	-11.4783	-2.18294	-1.20048	-3.24878	10.672	5.75689	12.833	-4.96626	5.49445	-17.5185	-10.2016	-7.3752	-0.770958	6.73331	1.08971	11.4484	-11.981	-5.04603	-1.53088	-10.172	-18.4017	7.04148	-5.27103	9.24229	5.99027	-23.645	3.46893
GSM1426147	-46.5411	0.40064	-19.2374	23.0409	-14.5006	-6.73872	-40.7795	12.797	27.6081	-7.09445	-16.3362	10.7047	-1.71739	-7.49005	9.21832	-8.49935	-7.23143	-11.477	5.18845	9.04555	10.9541	-6.68095	-4.25091	-8.12223	-12.4149	3.08048	12.1333	3.73113	-1.60551	13.759	-6.33368	1.26845	-3.7692	5.42252	-2.44574	12.8173	-9.76663	11.5612	-1.87474	-3.14205	9.5778	3.97868	-9.78285	-0.620265	2.98158	7.66883	4.33735	-2.88659	-0.605596
GSM1426148	90.6417	30.1677	-31.1063	26.8056	7.97619	-32.1023	-37.1935	7.59767	25.4387	5.01685	-19.9267	-20.2906	-1.11582	13.4974	13.4011	17.5555	-8.55449	-17.213	-10.8829	19.3834	-5.98446	-12.3372	10.3153	-1.43999	-0.574351	30.6947	7.79309	-13.6346	-19.1912	10.6365	-19.9474	-8.87736	13.3809	-0.887983	11.5926	-11.4759	3.39988	-6.85033	-14.5062	-2.93046	-1.89814	-8.60721	-0.587491	-3.08526	-3.11796	0.730956	-2.09694	6.57346	0.15566
GSM1426149	3.25634	0.334108	-26.3211	12.8605	-12.8223	3.84874	-21.9428	-0.848941	36.0568	-14.2238	-30.0551	-1.07806	5.49143	-6.25117	22.7806	12.3257	-11.6875	-6.137	-2.66029	7.20443	5.70593	-10.3312	-5.59312	-9.35274	-2.10397	7.64851	-2.23759	0.331612	-4.0032	11.1446	-12.14	-4.86169	6.14909	3.18403	3.39839	-5.9316	-15.1311	6.57607	7.41661	-6.77841	0.253636	-0.494315	0.202815	-5.7317	5.23721	-10.3345	3.61218	-3.00423	12.2117
GSM1426150	-46.3067	27.6707	-12.3145	5.16315	-9.79242	-6.37183	-18.164	-4.97669	-1.45535	37.666	5.51898	-20.6382	18.7771	27.0335	7.9433	4.19074	0.914501	-0.441603	5.47094	4.36625	7.12209	-7.13931	3.79245	-4.16663	-8.70785	-3.79234	-9.42249	-3.36015	4.12311	3.87182	-2.28888	-5.60271	0.722968	-0.613777	5.52714	4.88264	-0.398826	2.22218	-4.39928	2.83112	-4.63561	-3.82682	2.80999	-0.802546	3.40866	-3.18699	-0.0677254	-8.76949	1.45714
GSM1426151	5.46443	-7.74145	-13.9781	-6.94004	-23.7383	-10.7257	-4.12121	-20.5792	5.92048	-4.20672	-30.7557	-5.00952	-9.00982	-2.69857	-21.5071	18.5378	-6.29498	9.09822	-5.88441	5.53811	-1.48333	9.67613	7.48731	1.53359	-9.94073	-4.73341	-7.7471	15.9433	2.90946	-9.43757	0.24654	2.87361	-5.25232	4.81771	-6.15808	-3.19085	-10.4365	8.05596	-2.97631	-2.79123	-3.13875	0.748236	-8.86939	6.10974	0.476956	1.96692	2.40258	-3.83304	-5.44292
GSM1426152	-85.3175	19.4379	26.1783	-31.2256	-21.9664	-18.0082	-19.009	-30.4581	-14.462	3.32414	-24.4437	-8.46649	9.15213	-0.460903	-24.7276	-3.33819	9.34351	-4.64962	3.1799	-5.80952	1.33824	-8.37271	-3.42554	-1.36761	-0.903861	4.86052	-15.737	7.46655	8.12219	-3.53272	2.13967	5.07493	-3.2231	2.1346	10.8456	-6.7948	-0.709935	-7.70132	9.82978	-2.27323	-2.10145	-3.55179	9.58961	-5.74779	-2.05726	-0.619566	2.02596	-8.30688	4.11865
GSM1426153	12.6057	64.2374	-9.72589	44.3278	-20.2242	-38.1415	3.71209	-21.7881	13.2174	-10.1474	22.3764	-14.3356	-1.98567	0.371777	-1.53333	-1.00657	15.9585	5.14672	-2.23988	6.21026	5.15698	0.604139	-16.2	7.10572	4.547	-8.14106	1.03123	2.71305	-5.30593	1.42214	1.87366	8.99034	-5.91061	4.79878	-7.18453	-11.9625	5.61909	7.59441	-3.62192	-2.88825	9.38847	2.07799	-4.54124	5.04192	-2.0699	-3.25683	-2.50824	-4.45455	-4.42736
GSM1426154	-20.3749	10.2702	-6.7119	-6.12146	-22.579	-31.4372	-5.11581	-29.3542	-15.6256	2.05209	-16.4788	-7.0426	6.05251	11.3079	-15.2705	19.8779	10.7941	-6.07457	-2.13645	1.98084	8.32974	4.48999	-2.58493	4.47946	4.98921	-0.260601	-1.14127	5.24379	-10.2605	0.126273	3.14393	-2.8445	-2.97711	-0.273147	-5.43903	-3.94804	-5.03602	0.653917	1.43332	-4.70348	-1.54572	1.73563	2.83912	6.44903	1.1781	-6.12441	-3.33843	-2.06041	-3.87993
GSM1426155	70.6355	17.2962	-42.731	-11.1472	-3.97884	23.3472	-3.91116	-14.0498	-15.255	-5.44544	-18.098	-9.0188	-20.9752	-11.0918	-32.8879	10.5226	11.3552	-12.031	17.785	17.739	-14.6103	-1.46001	7.63453	-1.43871	-4.61164	-12.9039	0.904839	0.814391	3.72986	8.88975	5.29191	4.51695	16.6525	0.905322	26.5271	-8.53876	-6.3305	6.2001	-5.39069	-2.79655	-13.1561	6.2146	9.63907	25.3193	-15.1255	7.97484	5.90285	4.91504	13.3205
GSM1426156	-11.4897	-41.6637	-43.2061	12.1897	-15.4428	-9.68665	31.0607	-0.103198	0.748074	-34.3198	13.6678	-13.1425	-19.4902	-0.887204	-33.6071	12.6955	14.4309	-20.0345	19.7915	6.69307	7.20911	17.5241	1.05836	-13.0357	18.536	-0.0184292	11.4076	-0.767115	10.17	-12.6991	1.87594	-7.67183	-8.76281	5.95358	17.8107	4.053	-10.9351	-14.8853	3.70752	3.53496	10.2928	-1.94782	1.35746	4.89044	1.61297	-0.525978	-1.42218	18.2874	-9.59696
GSM1426157	32.31	-23.4526	-4.43993	-39.0389	-25.3662	-21.0862	-12.3978	-5.26435	7.02717	-25.7613	-24.2945	-3.36808	-6.50515	-9.81988	-12.4504	26.9442	5.50604	17.1513	-7.10558	14.3158	-8.87804	3.29994	2.96104	-13.8021	7.15465	2.63301	-17.4462	2.01145	-15.1627	-8.17956	5.72883	-13.7154	-0.755423	-7.20843	-5.3294	17.606	-3.3278	-1.5817	18.6864	4.52721	-5.56951	-7.40249	0.832692	-1.83376	-1.86774	-12.6465	-11.4007	7.14262	-5.00567
GSM1426158	23.4841	243.836	83.949	-44.7673	2.36515	-2.73832	39.3786	56.1839	-18.8125	-20.0496	37.1112	0.0775255	-48.8765	-2.46366	5.63304	45.1507	-6.52777	-22.9462	-2.72374	-5.41958	-16.3656	-19.5905	22.4671	-0.626484	-12.2355	-0.85214	-29.0915	2.00313	1.71542	4.68104	-11.8363	16.6279	-3.01633	-8.15865	-1.95324	8.3288	-3.73364	-8.51795	-14.0045	-16.242	11.3239	-2.33216	-8.54047	-6.01836	-1.29239	-1.40166	-4.88449	-9.22403	4.73809
GSM1426159	-2.72404	69.8895	16.4113	-43.1729	-44.3511	11.3711	-18.082	-7.69086	-31.2975	5.54176	-36.7392	9.95147	8.9945	-15.147	-21.1678	-13.6033	10.2494	8.92028	23.6698	35.6827	-26.2283	-1.28004	10.2193	-1.57355	10.7326	-16.7069	8.77994	-14.0496	18.0162	-13.327	2.07852	-1.31348	15.6143	-2.93197	-13.5988	-7.06841	4.0679	-0.578836	-7.79069	-20.635	11.285	-3.58172	0.964649	9.8759	1.05686	1.9052	3.61672	6.38344	6.45761
GSM1426160	-112.573	20.4094	13.3901	-12.321	-12.6017	-9.92413	-0.233571	-1.30389	-5.10624	-8.87784	6.31113	0.536315	-17.1081	6.12725	-9.17077	3.2047	-5.90121	0.490054	-3.85071	1.14422	-2.48543	10.2318	-2.08175	-11.6137	-14.5679	-14.8364	0.30515	-4.56099	-5.25635	-3.61392	-7.10451	-14.3134	8.15863	-1.00178	3.29456	0.323924	-8.3963	4.51523	2.07254	-3.22169	2.49925	-9.56438	-6.29313	-1.46666	-0.142283	2.93095	-0.61624	3.66473	8.16341
GSM1426161	113.371	92.4385	-39.9955	52.9909	4.40228	12.705	6.14392	-8.065	2.38098	-21.311	7.61465	-32.2086	3.64832	4.79917	-44.7926	-15.9232	21.4968	-15.3271	27.0094	-4.76368	-19.5336	3.60263	6.28902	-5.80331	16.8772	-3.29812	8.34534	1.69253	12.6144	7.63885	-21.1536	-20.1693	-11.8056	4.52895	5.07731	7.19948	2.28477	-15.1421	0.219633	9.57449	-12.7074	5.70666	-8.32688	-28.2306	13.9924	-18.5852	0.782668	-13.9483	-3.62557
GSM1426162	-70.233	44.8296	7.93644	-9.65548	6.58346	0.0737462	-26.8205	-5.183	-0.505421	-15.8177	-27.67	7.79224	-13.5305	-3.39769	-17.5568	-11.9011	18.4596	6.60933	-7.83498	-8.87151	-1.81682	-1.75221	-5.71568	-10.9266	-7.26527	-9.31835	-0.398592	5.35874	-2.81174	3.68286	7.91276	6.3586	3.25568	4.78673	-6.55226	-8.78942	1.12646	3.0405	5.52491	-2.54767	-2.07329	10.267	-0.55755	-7.45135	-7.84699	3.16444	3.66042	-8.24021	4.62563
GSM1426163	-41.3714	-5.73175	-22.3299	2.8801	4.47725	-28.2664	2.93615	-23.1612	9.88333	-47.3628	-20.0115	-0.404442	-0.136173	-8.74988	-3.24316	-5.93742	-0.932525	8.34806	3.38328	-8.90327	3.04712	-7.45954	-10.7628	-3.45553	-10.6853	4.66025	-12.8137	3.00087	-4.39097	-8.47464	5.50617	-5.47375	6.26502	-3.833	4.01847	1.01203	-2.68452	-1.25828	0.656365	6.01084	5.01907	1.44995	-4.43648	-4.44191	6.54718	-3.76364	0.632349	2.43618	0.0379976
GSM1426164	81.4111	6.19108	30.5944	-55.9477	-38.9732	-2.29756	14.0091	-18.4202	13.6937	-0.674202	14.8306	19.5271	12.9693	18.845	-1.30274	-30.6798	-18.7963	-0.07833	-21.388	5.7081	3.63089	15.8913	-7.23956	-23.0394	5.21927	17.4427	1.30701	-2.5694	-7.29613	-16.6548	0.893575	11.5006	1.16984	-11.5135	7.43178	2.32723	4.94335	0.167118	-5.56681	-8.93175	3.69333	0.00026433	4.66493	-5.20089	-1.34372	-10.6819	-5.74871	-4.77528	3.34222
GSM1426165	144.909	30.0293	15.0593	-31.227	-23.8784	17.9082	4.65298	8.6305	37.405	31.7655	16.9631	4.07176	5.26448	11.5287	-21.0877	-21.3203	-5.19225	-19.4902	-5.05649	1.81476	29.1805	-20.3217	19.0213	-2.13213	2.27978	-7.69813	0.321328	17.5535	-0.0797014	-13.3051	-3.21299	-15.24	-5.46057	-21.1698	-7.19954	-18.7235	0.704392	5.00176	3.2214	6.45094	-0.394476	-13.0416	-9.82879	-14.1833	-30.6897	-0.406261	8.84635	10.0618	5.95725
GSM1426166	61.7004	-21.6436	-80.1874	16.9182	-12.3236	2.78968	14.6546	24.9774	-13.024	-20.5412	0.090734	-11.2006	31.0964	6.18841	-4.70407	25.9105	-0.71823	-22.1601	-15.453	-23.1862	-3.7781	1.19252	-2.5589	21.7169	-8.2784	6.92153	8.08688	-0.740577	33.2085	-9.74107	8.33468	-5.77268	12.1581	8.689	-7.27328	5.38524	15.8206	10.3356	8.20658	3.38613	-10.3524	-16.5754	-7.52011	18.1584	-22.3366	-19.8435	10.1656	-7.97928	0.975912
GSM1426167	-5.87506	-60.2299	11.1658	-19.0637	-24.7364	-2.23268	16.3321	-16.5882	29.5874	-25.7045	-20.2726	2.33671	5.27302	13.2903	-20.4905	36.38	-0.20627	6.68898	-2.68649	-15.998	6.61287	1.49735	21.5985	-0.789607	11.8338	6.07259	-1.84329	-15.2605	-4.0177	4.81297	9.91616	-6.28858	-32.7145	2.74261	-19.2283	-0.860743	10.7731	20.1211	-6.18125	21.3377	14.8272	2.51731	-3.87378	-0.077378	-4.73548	13.5113	1.34834	-14.9344	8.42105
GSM1426168	109.131	21.6307	52.0369	-31.1801	-38.7464	23.872	8.31027	3.74646	49.5741	8.13773	39.6292	-13.4787	27.6867	-6.01126	-36.0081	-40.7708	-29.4013	-29.7183	-23.7213	-3.23663	-22.7086	6.97177	9.79213	1.65247	9.53207	-13.5628	-5.79205	19.9859	-20.7234	13.9883	6.46439	-7.19177	4.257	7.48146	-16.4792	12.5831	1.0816	-0.263015	8.28248	-2.36407	-1.90278	12.9767	8.1934	16.1595	18.2086	8.93161	-1.26656	0.13632	-0.0385543
GSM1426169	37.8198	-72.1358	10.1712	-37.2516	-43.9978	10.2735	-13.6017	11.8642	-1.81551	-13.9719	29.8446	-19.1561	6.89864	8.93211	23.0349	-4.65498	14.7403	0.088408	-15.7911	-3.26394	-9.96935	14.5705	5.02359	-23.8911	-14.6966	-0.071366	-1.3381	-13.3526	14.9808	6.94575	10.8862	13.6299	7.26229	-1.75978	13.5946	4.93757	-2.35169	4.96283	8.11059	-6.07306	7.35337	5.03	-4.74253	6.7405	-2.2408	-7.93472	2.37062	-9.89269	-12.6733
GSM1426170	14.7941	-35.2618	10.9625	-36.2273	-38.8825	-9.71129	-6.28433	-15.4091	20.1344	-17.1646	5.82054	3.00775	6.37742	6.98382	14.0793	14.5415	-24.7146	13.604	-10.7187	-1.34804	-21.9132	5.6924	28.1554	0.791056	-8.0071	6.60064	19.7954	-11.181	-0.452814	5.77693	1.37048	-10.5946	14.1894	-6.82715	0.642894	-4.57346	-2.02682	-16.8202	-7.9281	25.3694	-2.51985	-12.0133	-5.15381	3.34059	2.58117	9.81819	0.274655	-5.84838	1.18925
GSM1426171	91.3367	-20.2546	-31.5882	-3.6997	-42.4182	-10.5274	-27.5029	16.956	-17.5849	-13.2368	7.95199	-32.2421	-0.371102	10.3068	23.876	3.35774	15.1767	6.89729	-6.45764	-13.4376	1.17108	-2.39631	-11.6092	-7.95418	4.54774	-6.51008	9.9396	5.72286	3.36932	3.7261	4.36218	4.22191	0.399455	-1.27292	3.32471	11.0177	-0.201207	5.62724	-6.26503	-0.92113	-1.69429	-1.77291	1.00546	-3.02897	3.5342	-0.91924	1.39704	-1.33075	-1.97788
GSM1426172	-5.95754	-70.3067	-34.378	-36.1837	-58.9804	12.4594	-5.44465	4.36947	-1.39996	-9.8551	2.17823	-5.76706	-10.1085	-12.6826	5.27373	10.3944	-15.1165	-4.02307	-12.0592	5.69883	5.5815	6.60071	4.8426	8.45712	-2.31765	-9.43609	-9.2914	-6.84868	-0.164253	-2.58297	5.27438	12.8604	15.5793	4.98612	-6.30848	-3.85196	-2.76558	-1.87154	5.2788	1.94999	-5.11834	-3.53227	4.4212	-6.88643	12.1505	2.05434	10.7411	13.8432	-5.68934
GSM1426173	23.701	-71.9159	-21.763	-49.0784	-38.1444	33.7385	-30.2694	27.2263	-35.6249	-19.2124	12.9396	33.7665	10.0738	5.61019	-21.0424	5.79373	14.862	-8.29523	19.3066	-17.37	-4.91644	-30.8569	5.54002	27.4628	-8.32161	13.5366	10.2646	-5.87806	-23.4378	11.26	13.8406	-0.915007	8.13618	10.7349	4.93032	-15.358	16.5042	12.8848	-1.69231	1.55264	5.803	14.593	-12.34	-6.80285	12.8308	0.587539	1.0186	5.34484	3.43648
GSM1426174	-13.2772	-80.2567	25.6023	-55.8764	-43.7492	0.853464	0.74209	-9.31095	-6.68232	-4.94464	4.44845	-15.6971	-0.727181	11.6098	11.4326	1.91411	20.7099	4.26285	-15.5059	-1.36057	-18.4664	11.3117	3.71068	-14.9569	9.01162	0.376017	7.8673	-9.90225	-5.9541	-3.80715	-1.57217	18.7664	-1.95928	9.37587	-9.61016	-8.3864	5.5249	3.2257	-12.4832	-7.44145	-2.74344	15.5505	8.6242	-12.4708	-11.4996	8.43784	-4.62479	-4.85821	-0.304488
GSM1426175	75.9482	-65.7188	73.0943	32.0738	-13.3565	31.4929	23.8269	2.97482	10.6611	4.64994	-16.346	26.3688	-17.5801	7.22992	13.494	-5.75929	9.13741	9.46237	-13.0744	-4.07908	6.00258	-0.0222331	-0.987919	5.42221	-23.2644	-16.0588	-5.70503	12.1328	33.3076	-1.15119	12.3843	-21.3448	-2.71435	-2.64101	3.44007	-13.9365	1.16578	-22.0876	-1.34641	-13.6505	9.01237	12.6664	-8.33591	0.65885	19.9043	-12.2808	2.06509	1.1294	9.40794
GSM1426176	9.86885	-95.7505	80.9402	18.9883	38.4303	36.4358	-7.88611	-7.11465	-3.53277	-29.8912	-24.3684	8.75145	-2.40289	16.6959	26.6961	-15.7096	5.77356	-4.14446	-12.1723	9.53249	-19.2431	-1.32789	11.3509	25.4538	16.8789	-12.363	-8.80879	26.8968	-2.34563	-23.0646	-12.3062	7.52677	-7.67409	18.3072	28.1306	16.6062	17.4337	10.5186	-13.3519	8.36649	-17.4146	-21.008	-2.73534	5.01489	9.12194	10.9111	-1.28473	-0.406635	3.05847
GSM1426177	64.7972	-27.7387	48.4104	63.4374	-15.9647	31.8569	-19.7804	12.8455	-9.64551	-20.3595	37.2237	17.8787	32.9618	39.5741	-13.6653	6.00015	7.87319	13.6381	27.999	-2.94022	22.4463	-8.40696	-2.23235	-7.81205	7.66583	19.2185	-20.953	-5.41798	3.68362	-10.7326	-14.0533	7.0438	18.3018	12.7794	-2.40184	9.88275	-6.17545	1.54354	6.34768	-11.8439	-1.13265	-0.0892559	3.5433	1.98945	-9.7177	23.1256	3.53526	5.25931	5.48788
GSM1426178	8.04958	-30.7138	63.1636	46.1501	-7.55041	18.8932	-29.5835	-4.44566	-8.03344	-23.8701	54.8921	39.9135	23.7448	17.7201	-13.2026	22.5711	-19.5215	25.6033	20.4808	9.16349	-14.3898	-7.18778	-13.6459	6.51813	-8.89524	-1.27714	3.45685	8.97363	13.7756	-0.184885	11.8137	-4.78749	-16.2053	-15.1619	-1.25362	0.470918	-20.0128	15.9406	5.12668	-9.58195	-7.92955	-8.33721	3.9454	-7.58819	9.75592	1.70565	-1.79614	-0.485803	-4.66096
GSM1426179	104.896	-19.5551	90.5409	59.8647	-80.0788	55.8134	44.9657	12.2003	49.0628	55.4441	-44.6352	40.0838	-24.0367	-6.05337	4.41901	7.89786	40.5842	-13.1981	5.9094	-17.7294	-12.0577	1.86174	-29.9741	-1.06245	-9.96102	10.8087	5.09319	-22.3482	-7.62783	-1.75148	-4.71089	-7.7674	0.433513	11.1511	-5.82086	16.4881	-3.75934	0.219623	-10.2024	5.85112	-3.67605	-6.50604	6.7079	7.12224	0.00617855	-5.44131	-7.78854	0.310555	-8.87478
GSM1426180	87.2011	-9.8045	68.3844	47.2931	29.9019	-4.70106	-14.6989	-33.7685	-13.8557	-24.501	1.11597	-13.7606	2.67215	13.2461	5.01024	10.8412	-0.835001	1.77885	0.0625338	-13.8643	3.35231	26.3987	1.55642	-0.412459	-11.898	8.18946	17.4903	10.6642	6.22768	11.5052	-11.3799	-2.89938	-6.7481	-8.36264	-16.3609	-18.8365	-3.89675	-27.8351	-2.01958	2.83786	-12.9208	-0.083028	14.8509	11.3752	4.55895	15.4411	-4.28737	5.12972	18.4249
GSM1426181	72.8605	-78.2136	47.7254	45.1018	31.6235	18.2997	29.6902	30.5654	-3.3968	1.93985	-37.5997	-19.0432	-12.8972	22.988	-6.56829	0.389754	-7.94732	4.08484	7.7865	13.8679	10.8917	6.69408	-11.4447	-12.9636	12.2035	12.7177	-17.2072	-0.186482	-14.6537	25.258	21.0628	14.209	-1.5368	-4.84764	-1.38187	-3.72391	14.9462	-16.9528	19.5319	-19.4565	-13.9791	-5.63953	-25.0807	3.90878	-5.62875	11.6791	19.9794	-10.9088	-0.192087
GSM1426182	20.4726	-69.7046	85.1691	12.4706	-2.27072	31.6091	-21.4008	-6.20929	20.7583	-14.8399	-7.39909	2.44163	-1.17687	-6.89732	8.9037	10.7921	-19.8149	-4.61492	29.4743	8.97662	-8.06962	37.2779	-18.2798	31.5875	4.95505	-22.9568	1.60275	6.23899	-1.09037	11.562	-12.2172	16.4539	15.0292	-22.4422	4.0347	0.179422	3.02461	1.72233	3.95486	15.8173	23.8142	19.6266	-8.58925	-11.7909	-28.2152	-11.1277	-5.30405	4.44981	-7.02376
GSM1426183	53.0988	-61.3574	40.6853	55.2206	-1.31441	16.0453	-15.9105	8.33903	-18.0863	-14.8044	-15.9098	-10.6771	-8.84471	13.8895	12.931	3.87604	-9.72943	-5.99191	-4.88505	-3.87958	4.37652	-0.8456	20.9912	-10.7952	-1.5202	-4.9309	9.94503	7.14123	1.76268	9.44346	10.5176	1.90952	11.9655	-11.6195	8.41513	-3.49869	2.53885	10.0648	10.8303	5.84305	14.4095	1.26825	15.1181	2.71849	13.0928	-2.05715	-8.16451	-10.0059	-4.9469
GSM1426184	74.1194	-49.3493	40.7602	-78.3166	11.1929	61.0389	-9.99317	-8.49315	-48.0288	-2.67678	22.3917	-20.5517	13.098	-52.5769	1.35497	-23.401	22.5232	4.17943	-22.6035	29.1951	14.7271	15.0864	-11.2333	13.8577	-5.75214	30.1241	-19.7299	-11.0129	12.5362	34.5077	-2.44271	-12.1335	-14.9795	11.4544	3.50435	-2.69004	-17.3248	4.11778	-5.76696	13.4916	2.39803	-9.0817	-8.32055	-0.918284	-4.33701	-1.22222	-4.76513	6.47022	9.55795
GSM1426185	64.535	-53.4372	45.0204	-21.5052	53.8098	9.9868	36.0281	-42.8693	-15.4209	-18.0375	-11.7799	-9.27687	23.9334	-20.6661	8.73512	18.5665	6.66571	-20.0687	-12.1069	4.12732	1.05993	-29.3399	-7.06991	9.6938	-6.47268	-17.0555	13.6246	-6.91263	-10.5157	-7.74496	10.1008	-12.1357	-0.913987	13.5084	-7.49344	10.0942	-2.94505	-13.6956	3.37062	-15.522	14.333	-8.56692	17.0968	-19.5536	-7.87405	24.5577	11.9786	3.60279	-20.3834
GSM1426186	-6.69171	-38.8676	17.1732	-46.9023	-2.10544	-5.01196	-2.80005	-33.8665	17.635	-39.3459	1.77747	5.36898	-4.98262	21.2831	8.85698	-7.43142	-0.0186642	16.4786	0.416435	3.25944	-3.81497	-5.1098	-0.253369	-13.328	10.3013	16.1333	-17.8501	-14.3184	-1.72814	-19.795	-1.25043	-5.21143	-6.74888	-1.59029	6.94002	2.02364	-3.86362	-14.6503	-4.15062	-2.26779	-3.7327	7.37685	-13.4422	0.893951	-5.28421	-6.62313	0.661781	5.36821	-10.9165
[truncated: 59 more columns]

## Sheet: C
Samples	PC1	PC2	PC3	PC4	PC5	PC6	PC7	PC8	PC9	PC10	PC11	PC12	PC13	PC14	PC15	PC16	PC17	PC18	PC19	PC20	PC21
control_1	-0.347108	2.12742	0.609591	1.86695	1.50277	-3.91469	2.12806	1.31786	-1.67296	-4.02742	1.93192	-1.28254	-0.856796	3.05247	-0.75148	2.25818	-0.398802	4.67581	-0.191908	1.12544	8.66e-15
control_2	-3.79167	1.55218	-0.419914	4.03853	-3.2514	4.03161	4.4122	0.354158	-2.62303	3.91396	3.78388	0.983386	-1.38613	1.01633	3.18097	0.930934	-0.26947	-0.122063	-0.004003	-1.60041	9.35e-15
control_3	-4.07133	-0.0347573	3.33776	2.50125	-2.68904	-6.56372	0.849764	-0.647592	-0.0904228	1.6343	-0.355339	-1.59158	5.17453	-0.502992	0.109713	0.151582	-0.0855362	-1.55699	3.09716	0.104057	8.33e-15
control_4	-4.0151	0.937716	-1.08235	-1.66812	3.10351	-0.311464	-2.21004	0.534328	2.52469	3.28254	1.55885	-3.45036	0.341009	-1.60762	-2.26593	4.4934	-0.483597	-0.614036	-2.44336	-1.55226	6.71e-15
control_5	-0.590963	-0.882176	6.3614	1.80383	-1.0622	-0.865107	0.688463	0.366655	6.61594	0.290483	-0.327266	3.23846	-2.53081	-0.855014	0.786054	-0.0361214	-2.7217	-0.0871253	-1.33398	1.58371	9.9e-15
control_7	-1.23087	4.13899	0.194496	-1.15325	2.97078	-0.699308	-3.81315	-5.39758	0.0420947	-1.26894	0.507526	0.855826	-1.04651	-0.532628	4.78151	1.54544	3.04648	-0.605656	0.527486	1.2327	8.45e-15
control_8	-1.88013	3.366	-1.81128	-1.15606	-3.42345	-0.128743	-1.43056	-1.87192	-3.22509	3.26143	0.113688	-0.476075	0.790657	0.0642055	-1.77984	-2.35087	-0.51807	0.256132	-3.18163	3.76306	9.09e-15
control_10	-1.96916	6.97591	1.00028	-4.53973	-4.27293	-0.768718	-2.3471	-1.94345	-1.44729	-1.04442	-2.34254	2.71345	-1.64385	0.327822	-1.88508	-0.0319337	-1.60175	0.960705	0.990404	-3.15831	8.85e-15
UC_active_1	4.89097	-2.52732	6.00756	1.94251	2.95977	3.02834	-4.87615	0.623474	-2.62095	0.187155	1.23759	-0.0742037	3.2975	-1.11765	0.800351	-2.17099	-0.804488	2.16428	-1.03271	-1.53006	8.68e-15
UC_active_2	7.62722	-3.30991	0.0490589	-2.94734	-2.08719	3.1838	-1.56884	-1.53743	0.284652	-1.96722	3.06681	-1.5394	0.421931	3.76177	-0.698851	1.53233	-2.411	-2.81853	1.66803	1.00922	8.26e-15
UC_active_3	5.10596	0.235555	-1.26083	3.31598	3.69381	-2.19734	0.665854	1.35434	-2.88556	1.03243	-5.96297	0.995318	-0.577162	2.8099	1.04569	1.00124	-1.20966	-2.55931	-1.69654	-0.525167	9.28e-15
UC_active_4	7.90498	-1.39147	-0.447231	2.11383	-6.63136	-1.19802	-2.10181	3.74172	-0.231118	-1.4365	-0.807653	-2.25418	-2.55085	-3.02135	0.479323	0.948222	2.90764	-0.189699	-0.464485	-0.11638	9.22e-15
UC_active_6	-2.67781	0.888883	-0.677559	0.991582	3.17978	0.777869	-1.14502	0.554184	0.62984	1.95132	-1.10855	-4.87249	-4.66997	-0.0561453	-0.123639	-3.46851	-1.21855	0.399438	3.18251	0.25666	7.52e-15
UC_active_7	5.05181	1.07945	1.64502	-0.18798	3.43949	2.381	2.98912	0.0696217	-1.82561	2.15881	0.010219	3.45639	-0.497682	-2.59034	-3.99734	1.65154	1.96836	0.0458361	2.68859	1.43024	8.16e-15
UC_active_9	6.45986	-6.01453	-5.63601	-0.680372	-0.922915	-0.888932	1.79603	-4.42518	3.53844	2.95274	-1.564	0.390409	1.41029	0.277723	0.681096	-0.524627	0.122541	3.30988	0.238241	-0.91231	7.38e-15
UC_inactive_1	-0.0838201	2.32482	-3.1236	-1.18958	1.00352	1.95908	4.42822	-0.4489	-0.850228	-4.76125	-0.81032	-1.35194	1.87207	-5.00655	1.60084	-0.238075	-3.14416	-0.565687	-0.422001	0.242866	9.34e-15
UC_inactive_2	-0.078737	1.84365	1.32908	2.93446	0.791524	0.496088	3.27859	-3.42092	2.22139	-3.1858	1.21351	-1.13654	0.0271606	1.42759	-2.92677	-2.98846	3.13578	-1.92945	-2.00732	-1.66715	8.31e-15
UC_inactive_3	-10.5269	-11.7599	-2.17956	1.97265	-0.378555	0.604778	-2.35898	-0.919888	-2.2347	-2.62885	-0.658538	2.18501	-1.24844	-0.597506	-1.40752	0.497001	0.110523	-0.391627	0.15202	0.101885	8.45e-15
UC_inactive_4	-1.52494	5.19499	-6.59331	2.66671	0.79715	1.32307	-3.53361	4.9752	3.54873	-0.917133	1.30037	3.06515	2.63811	1.09228	-0.210019	-1.19976	0.369262	-0.191836	1.03098	0.254867	7.18e-15
UC_inactive_5	-5.20104	-1.14441	3.05535	-5.24587	-1.00082	5.03394	2.24574	3.14535	1.42195	-0.181141	-4.25336	-1.54647	2.10236	2.18142	1.21809	0.407167	2.48003	0.906597	-0.0562759	0.657556	8.09e-15
UC_inactive_6	0.948781	-3.60105	-0.357965	-7.37999	2.27776	-5.28352	1.90323	3.57597	-1.12076	0.753507	3.46616	1.69239	-1.06742	-0.123724	1.36286	-2.40769	0.726166	-1.08666	-0.741209	-0.700202	8.22e-15

## Sheet: D
Samples	PC1	PC2	PC3	PC4	PC5	PC6	PC7	PC8	PC9	PC10	PC11	PC12	PC13	PC14	PC15	PC16	PC17	PC18	PC19	PC20	PC21
control_1	-77.8566	23.764	7.98172	36.8692	-6.3955	-11.0328	25.4143	-23.5101	-5.62323	20.8228	2.539	15.9743	17.5683	8.5386	19.8671	24.8341	-6.72944	-4.03299	-9.26994	64.2639	8.93e-14
control_2	-55.6741	4.19651	10.7651	78.2686	-29.356	-48.7343	-71.161	14.7046	0.555733	-39.5101	23.9037	22.6994	2.1276	-32.8819	-7.72343	2.3821	1.61167	-3.36666	6.55645	-4.18527	-2e-13
control_3	-52.2023	70.2644	-44.4389	2.41027	4.60591	-21.5982	14.7397	-6.85649	-20.8133	16.7931	-27.9852	-3.35555	39.0606	-11.7264	-44.9487	-10.9494	-0.3336	47.5782	-15.1457	-11.1267	1.36e-13
control_4	-68.2792	-23.9947	50.0575	20.2913	-20.7218	9.80974	24.1421	8.75574	79.5409	-10.4556	-22.5916	-29.2759	-27.623	6.35232	-28.6246	10.9772	-15.9445	14.9906	11.8504	2.89616	-1.49e-13
control_5	-52.4034	66.2971	-7.57134	-27.6419	39.277	-26.3122	18.1466	15.8077	1.37611	-15.7103	-13.3768	-22.5006	-30.4935	-25.4552	26.2432	-28.0291	53.0051	0.978275	13.2817	13.4702	-2.83e-13
control_7	-57.9095	77.3639	1.84509	-12.8598	-31.7249	8.11923	7.22154	-11.3956	-19.0368	11.1535	12.0995	-3.31382	11.2183	19.2811	21.8397	5.9318	-21.4506	-0.0129472	65.6149	-21.3572	-1.51e-13
control_8	-51.8366	110.634	10.9184	-42.7512	-22.2041	44.3949	-45.5745	16.8473	8.7531	21.0522	34.8727	-0.526328	-17.3777	26.8617	-19.884	-9.37315	4.27493	-19.032	-31.5669	2.38794	-3.3e-13
control_10	-78.5739	15.4746	-5.55572	24.8584	1.88545	-26.0621	38.0034	-39.727	4.5758	-11.7442	-11.7906	7.23244	-10.5338	9.69519	30.3891	11.3465	-4.72977	-24.3248	-40.2755	-43.8015	1.17e-13
UC_active_1	47.2128	13.4803	16.9384	-24.6949	57.9484	1.06458	33.7479	37.4057	-24.0875	-68.0945	22.8218	12.8231	3.32519	26.9597	-15.6973	34.0129	-3.93123	8.49418	-1.55829	1.63663	-2.68e-13
UC_active_2	107.413	17.7269	25.3516	29.4831	14.4526	10.2083	-20.1301	22.0069	30.8122	-16.3103	-30.6152	-0.703981	48.7182	31.9588	29.5327	-41.5522	-6.41816	-5.12394	-5.41462	2.16691	-4.66e-13
UC_active_3	100.753	24.5979	57.5402	-18.231	-39.5405	23.9777	-12.6176	-13.7387	-36.2752	-6.90436	-68.0743	28.9548	-25.4499	-16.508	-13.2055	12.1517	-0.0982954	-15.7103	2.95401	4.41383	-3.97e-13
UC_active_4	155.403	18.9168	-55.1591	-26.1207	16.9241	-36.7145	-18.6185	-22.9626	43.6718	24.9446	14.1288	39.4545	-25.8429	3.78655	13.8894	15.0606	-1.4297	31.439	3.08324	-1.88452	-3.19e-13
UC_active_6	46.2081	-29.6352	36.9943	27.9576	-0.167801	20.9811	-5.52781	-12.5989	-43.3414	-1.42623	22.8208	-38.1523	-34.4831	-6.7034	22.5229	-23.8684	-33.1033	40.2614	-16.2931	4.05804	-2.72e-13
UC_active_7	110.868	30.6421	21.0569	-12.1166	24.2433	-14.4057	32.2895	5.92297	12.2593	22.3212	26.9034	-24.5445	20.5734	-55.6552	-13.3014	0.934452	-25.8127	-39.2881	-0.47213	-1.44106	-1.51e-13
UC_active_9	93.4357	-34.8857	13.2658	58.5473	7.56586	4.91411	-8.72628	-37.9397	-13.2033	19.5614	14.1075	-37.8418	6.53364	28.1228	-22.9811	17.7922	51.6377	-9.51722	9.81161	-6.95419	-3.55e-13
UC_inactive_1	-4.61283	-56.54	-49.5909	-64.7509	-56.2908	45.9193	-3.28715	-49.1069	15.9168	-49.3081	15.0292	-8.91134	27.7814	-20.9886	5.93185	-2.72161	11.5345	4.30124	-3.51427	7.19915	-3.03e-13
UC_inactive_2	38.2018	-60.6486	-43.4955	-4.82591	-96.0804	-25.3107	33.1958	72.7057	-13.6107	21.6864	2.55713	-5.10121	-1.00589	7.53229	11.2882	6.24235	12.2899	-0.0406569	-9.17534	-3.60489	-2.64e-13
UC_inactive_3	-51.1536	-40.2754	-89.5025	3.28549	58.7227	41.2878	-50.0019	27.2373	-4.38917	14.7157	-31.8753	-26.3962	-0.215713	-10.8963	15.3041	35.194	-13.4158	-8.58057	0.571291	-2.65184	-2.25e-13
UC_inactive_4	-18.8904	-63.0059	-84.6947	14.1559	20.2948	-9.22871	17.5221	-13.3539	-12.8113	-5.09992	0.19105	21.1631	-25.4942	21.0913	-32.9925	-46.6485	-18.8859	-30.3248	14.529	10.9352	-2.25e-13
UC_inactive_5	-55.377	-61.2793	46.17	22.6093	31.7688	72.0704	25.1096	16.0564	5.23491	29.7025	17.6018	54.6772	7.42556	-22.1812	4.20794	-10.4947	20.6369	12.6391	4.79222	-14.811	-1.11e-13
UC_inactive_6	-74.7266	-103.094	81.1239	-84.7436	24.7928	-63.3479	-33.8878	-6.2605	-9.50481	21.81	-3.26724	-2.35545	14.1875	12.816	-1.65763	-3.22294	-2.70765	-1.327	-0.358974	-1.60988	-1.96e-13
