# Supplementary material for: Bioinformatics analysis of oxidative stress genes in the pathogenesis of ulcerative colitis based on a competing endogenous RNA regulatory network
Source: PeerJ. 2024 Aug 16;12:e17213. doi: 10.7717/peerj.17213 (PMC11332386; doi:10.7717/peerj.17213)
Supplement: Supplemental Information 8 [file peerj-12-17213-s008.xlsx]

## Sheet: Table of contents
Supplementary Table S3-list of differentially expressed lncRNA, miRNA and mRNA
A differentially expressed lncRNA in GSE75214
B differentially expressed mRNA in GSE75214
C differentially expressed miRNA in GSE48959
D differentially expressed mRNA in GSE48959

## Sheet: A
logFC	AveExpr	t	P.Value	adj.P.Val	B
AMACR	-1.75242	8.1081	-10.1926	1.30746e-17	7.63554e-15	29.5044
MGC32805	-0.887596	4.62513	-8.84427	1.63312e-14	4.76872e-12	22.5764
CDK3	-0.702371	6.59744	-8.21122	4.43564e-13	8.63472e-11	19.3686
LOC648987	0.642112	6.3894	7.4284	2.43316e-11	3.55241e-09	15.4813
PLSCR3	0.746608	7.51303	7.17169	8.82124e-11	7.87139e-09	14.2324
RDH5	-0.736432	7.18855	-7.15821	9.43489e-11	7.87139e-09	14.1672
HOXA9	-0.683569	7.96592	-7.04211	1.68046e-10	1.22674e-08	13.6079
SATB2-AS1	-1.61796	6.33055	-6.33298	5.28626e-09	3.08717e-07	10.2711
LOC100506730	-0.749824	6.61151	-6.14188	1.30481e-08	6.92734e-07	9.39869
MROH7	-0.684604	6.36174	-6.09305	1.64036e-08	7.98309e-07	9.17787
C11orf52	-0.617953	7.24677	-5.94554	3.25875e-08	1.46393e-06	8.51598
LINC00526	-0.58869	6.8	-5.89716	4.07463e-08	1.6997e-06	8.30067
RTEL1	0.869639	7.80747	5.80812	6.13319e-08	2.38785e-06	7.9068
LINC00483	-1.32094	7.91519	-5.76726	7.39192e-08	2.69155e-06	7.72708
CCL14	-0.624596	8.36455	-5.75231	7.91317e-08	2.69155e-06	7.6615
PEA15	0.925543	10.0287	5.74193	8.29587e-08	2.69155e-06	7.61604
SPECC1L	-0.584033	8.7073	-5.6453	1.28538e-07	3.75332e-06	7.19478
HNF1A-AS1	-1.81927	7.70009	-5.61522	1.47199e-07	4.09352e-06	7.06444
SDHAP2	-0.924175	6.94514	-5.44133	3.19952e-07	7.47408e-06	6.31854
C12orf36	-1.61213	8.9692	-5.31362	5.61312e-07	1.26079e-05	5.77925
DLEU1	-0.607598	6.44088	-5.22394	8.29402e-07	1.67024e-05	5.40507
KIAA0125	0.959377	6.3515	4.88746	3.47229e-06	5.33636e-05	4.03597
LINC01123	-0.887911	9.18376	-4.64372	9.46425e-06	0.000122825	3.08074
LINC01106	-0.701639	6.7761	-4.37655	2.74096e-05	0.000308733	2.07162
PP7080	-1.28936	9.23052	-4.28521	3.90738e-05	0.000400335	1.73619
P2RX5	0.838455	7.28605	3.66744	0.000378002	0.00302402	-0.394769
LOC254896	0.695337	6.38368	3.61813	0.000448485	0.00327522	-0.553921
MIR155HG	1.00995	5.87732	3.56295	0.000542052	0.00386047	-0.730027
LOC100506990	-0.598457	7.12942	-3.46167	0.00076356	0.00512551	-1.04767
LINC00152	0.819277	8.82297	3.13536	0.00219775	0.0123412	-2.02029

## Sheet: B
logFC	AveExpr	t	P.Value	adj.P.Val	B
SLC38A4	-2.60054	5.08107	-14.3112	8.59101e-27	1.95102e-22	50.0195
NAT8B	-1.25668	6.22436	-11.8943	2.01218e-21	2.28483e-17	38.053
APOBEC3B	-2.47626	8.04241	-11.634	7.83447e-21	5.07316e-17	36.7335
PDE6A	-1.69927	5.38187	-11.6089	8.93555e-21	5.07316e-17	36.6058
TAT	-1.04924	5.3149	-11.403	2.62673e-20	1.19306e-16	35.5586
SLC4A10	-1.35169	5.34364	-11.2424	6.09721e-20	2.30779e-16	34.7406
HINFP	-0.705943	7.702	-11.0698	1.50992e-19	4.82834e-16	33.8595
CYP2B7P	-2.90188	6.06646	-11.0471	1.70087e-19	4.82834e-16	33.7437
PRKG2	-2.42674	5.1411	-10.8715	4.28302e-19	1.08075e-15	32.8461
LEAP2	-1.20327	6.07861	-10.8085	5.96785e-19	1.3553e-15	32.5236
KRT12	-1.43643	5.98487	-10.698	1.06737e-18	2.20363e-15	31.9584
AQP11	-1.21783	6.59102	-10.648	1.3887e-18	2.62812e-15	31.7025
RNF135	-0.717299	8.13892	-10.591	1.87551e-18	3.27637e-15	31.4103
SFXN1	-0.929647	8.73468	-10.4666	3.61251e-18	5.86e-15	30.7729
LOC100127951	-0.818299	4.67008	-10.3967	5.2209e-18	7.90445e-15	30.4147
SLC25A20	-1.19758	7.97411	-10.3819	5.64424e-18	8.0113e-15	30.3389
SLC23A1	-0.982548	6.962	-10.3398	7.04362e-18	9.40945e-15	30.1234
PLA2G12B	-1.18728	6.15942	-10.2418	1.18056e-17	1.42267e-14	29.6211
SUGCT	-1.31824	5.87731	-10.2403	1.19026e-17	1.42267e-14	29.6131
NAT8	-0.84935	5.67915	-10.2138	1.36855e-17	1.55399e-14	29.4774
ETFDH	-1.5655	7.93066	-10.1289	2.14124e-17	2.3156e-14	29.0419
PDIA5	0.761445	8.50787	10.1154	2.29828e-17	2.37245e-14	28.973
BAG3	0.773659	8.90485	10.0677	2.95616e-17	2.91889e-14	28.7282
CNTFR	-1.74939	7.21349	-10.0209	3.78181e-17	3.57854e-14	28.4885
NAALADL1	-1.46394	7.05329	-9.94815	5.54809e-17	5.03988e-14	28.1157
NRG4	-1.19282	4.87522	-9.90684	6.89661e-17	6.02392e-14	27.904
RMDN2	-1.56327	6.20871	-9.85887	8.87874e-17	7.468e-14	27.6582
HSD17B3	-0.774612	5.33351	-9.83074	1.02962e-16	8.35095e-14	27.514
WDR78	-1.63881	6.13919	-9.80481	1.18027e-16	9.24276e-14	27.3812
CROT	-1.38347	6.87502	-9.78928	1.28082e-16	9.69579e-14	27.3016
ACOX1	-1.53445	9.50541	-9.6938	2.11698e-16	1.46507e-13	26.8127
ZSWIM3	-0.713195	6.26029	-9.69305	2.12536e-16	1.46507e-13	26.8088
CNN2	0.985476	9.7158	9.69273	2.1289e-16	1.46507e-13	26.8072
LIPC	-1.03475	5.14267	-9.62627	3.02004e-16	2.01721e-13	26.467
CHPF	0.757268	8.54842	9.61577	3.19149e-16	2.07082e-13	26.4132
SLC6A14	5.05502	9.88821	9.57472	3.9603e-16	2.49829e-13	26.2032
SEC24D	1.11355	9.08011	9.52178	5.23107e-16	3.21075e-13	25.9324
TCP11L1	-0.644542	7.1778	-9.51546	5.4077e-16	3.23181e-13	25.9001
SOS2	-0.715965	9.48845	-9.48898	6.21526e-16	3.6192e-13	25.7646
SPATA25	-0.631804	6.38314	-9.48387	6.38447e-16	3.62478e-13	25.7385
SERF1B	-1.0738	7.05417	-9.4586	7.29095e-16	4.03847e-13	25.6093
ARHGEF37	-0.939341	6.72319	-9.41694	9.07412e-16	4.9065e-13	25.3964
ENC1	0.978843	8.22549	9.39498	1.01833e-15	5.37819e-13	25.2841
CHAD	-1.29035	6.93736	-9.38089	1.09648e-15	5.65932e-13	25.2122
HSD3B2	-1.72215	5.32397	-9.35298	1.26948e-15	6.40662e-13	25.0696
CDC14A	-1.49156	7.60932	-9.33513	1.39416e-15	6.88292e-13	24.9784
ACADM	-1.15834	9.35259	-9.32354	1.48158e-15	7.15889e-13	24.9192
SNX13	-0.804967	8.58354	-9.28873	1.77836e-15	8.41385e-13	24.7416
BRINP3	-2.23736	5.24337	-9.21291	2.64648e-15	1.22656e-12	24.3547
DNAH7	-0.787037	5.09898	-9.20018	2.82897e-15	1.28492e-12	24.2898
RNY1P5	-2.24162	5.20359	-9.19229	2.9484e-15	1.31291e-12	24.2496
TMEM184B	0.740639	9.11097	9.18779	3.01867e-15	1.31835e-12	24.2266
C2	2.06942	8.07102	9.13979	3.8816e-15	1.63243e-12	23.982
TIMP1	2.54974	11.1005	9.13122	4.05977e-15	1.67632e-12	23.9383
C2CD5	-0.732777	8.82743	-9.0893	5.05572e-15	2.05028e-12	23.7248
PPAP2A	-1.06444	8.99141	-9.0717	5.54338e-15	2.2086e-12	23.6352
CD74	1.54967	11.9901	9.06412	5.76781e-15	2.2584e-12	23.5965
DAPP1	1.94617	7.46435	9.05505	6.04804e-15	2.32798e-12	23.5504
ME3	-0.851305	7.80997	-9.05081	6.18371e-15	2.34053e-12	23.5288
SLC35G1	-1.55682	7.28031	-9.02792	6.96986e-15	2.59485e-12	23.4123
PARP8	1.45927	8.33629	9.00232	7.96818e-15	2.91867e-12	23.2821
SLC19A3	-1.41658	6.16792	-8.98979	8.50742e-15	3.06672e-12	23.2183
ARHGAP42	-1.05243	7.96246	-8.95997	9.94164e-15	3.52773e-12	23.0667
RN7SKP127	-0.943576	4.28766	-8.94847	1.0557e-14	3.68847e-12	23.0083
AP1AR	-0.848067	7.83522	-8.93432	1.13668e-14	3.83331e-12	22.9364
SEPHS2	-0.729034	9.12092	-8.93254	1.14729e-14	3.83331e-12	22.9273
HSD3B1	-0.59317	5.79454	-8.93245	1.1478e-14	3.83331e-12	22.9269
VLDLR	-1.51578	6.23031	-8.92518	1.19223e-14	3.92401e-12	22.8899
EFCAB5	-0.774463	4.79715	-8.91766	1.23998e-14	3.94604e-12	22.8517
MS4A10	-0.990752	5.56156	-8.91596	1.25106e-14	3.94604e-12	22.8431
C7orf31	-1.21876	7.10866	-8.90923	1.29578e-14	3.97664e-12	22.8089
PPM1A	-0.718903	7.9266	-8.90465	1.32713e-14	4.01855e-12	22.7856
FRMD1	-1.36783	6.49317	-8.89591	1.38907e-14	4.15076e-12	22.7412
SLC23A3	-1.10002	6.34971	-8.89113	1.42412e-14	4.20022e-12	22.717
EAPP	-0.857615	7.95476	-8.88004	1.50895e-14	4.35777e-12	22.6607
CREB3L3	-1.447	6.7439	-8.87916	1.51591e-14	4.35777e-12	22.6562
BDH2P1	-1.0591	6.9399	-8.85879	1.68587e-14	4.76709e-12	22.5528
NAP1L2	-0.813132	4.51026	-8.85716	1.70028e-14	4.76709e-12	22.5445
PHLPP2	-2.09312	8.41702	-8.85217	1.74506e-14	4.83298e-12	22.5192
STBD1	-1.13211	6.5814	-8.81091	2.16395e-14	5.92088e-12	22.3099
SLC22A5	-1.9516	8.31138	-8.8018	2.26909e-14	6.13465e-12	22.2637
FGFR2	-1.72461	6.91934	-8.76593	2.73535e-14	7.3082e-12	22.0818
SLC6A4	-0.803137	5.62788	-8.75059	2.96284e-14	7.75841e-12	22.0041
TMEM63C	-1.87189	6.05233	-8.74998	2.97218e-14	7.75841e-12	22.0011
RBPMS	1.47075	8.35324	8.72174	3.44285e-14	8.88489e-12	21.858
ACAT1	-1.44309	8.09683	-8.71649	3.53827e-14	9.02855e-12	21.8314
AQP7P1	-0.943372	6.27321	-8.70765	3.70467e-14	9.24539e-12	21.7867
MIER3	-1.6232	9.22824	-8.69335	3.99076e-14	9.85111e-12	21.7143
MSI2	0.635839	8.07202	8.68486	4.17093e-14	1.01135e-11	21.6713
GCNT2	-1.2113	5.67643	-8.68416	4.18612e-14	1.01135e-11	21.6678
SHISA5	0.656527	10.3439	8.67214	4.45623e-14	1.06527e-11	21.607
OSBPL11	-0.703008	7.25475	-8.66426	4.64255e-14	1.09825e-11	21.5671
B4GALNT2	-2.64348	7.11601	-8.66102	4.72129e-14	1.10537e-11	21.5507
HADHB	-0.691065	9.43537	-8.65599	4.84639e-14	1.12308e-11	21.5253
CNST	-0.633411	7.32008	-8.64344	5.173e-14	1.18665e-11	21.4618
SNX30	-1.15683	8.20429	-8.64079	5.24473e-14	1.19108e-11	21.4484
ENPP1	-1.67832	7.78362	-8.6332	5.45577e-14	1.22674e-11	21.4101
STK38	-0.635557	9.73867	-8.62456	5.70624e-14	1.27048e-11	21.3664
ABCG2	-3.3316	6.68042	-8.60983	6.16001e-14	1.35602e-11	21.2919
LPCAT1	1.57444	8.95438	8.60828	6.20987e-14	1.35602e-11	21.2841
SEPSECS	-0.83686	7.38783	-8.60026	6.47363e-14	1.40015e-11	21.2436
NDRG1	-0.820084	10.5793	-8.57136	7.5214e-14	1.61142e-11	21.0977
CCNJL	-1.05907	7.85436	-8.557	8.10337e-14	1.71988e-11	21.0252
SLC16A1	-1.66369	7.77735	-8.53885	8.90335e-14	1.87218e-11	20.9336
CNKSR3	-1.28595	6.9515	-8.52692	9.4714e-14	1.97335e-11	20.8734
PDE8A	-0.959045	9.22882	-8.51237	1.02135e-13	2.09424e-11	20.8
AQP3	0.804152	8.13169	8.51194	1.0236e-13	2.09424e-11	20.7979
CREB3L2	1.09519	9.51768	8.50487	1.0618e-13	2.153e-11	20.7622
BDH2	-0.891468	6.04073	-8.48968	1.14875e-13	2.30869e-11	20.6856
TBC1D12	-0.62643	7.94393	-8.48122	1.2002e-13	2.39093e-11	20.643
SLC25A34	-1.00763	6.94666	-8.47825	1.21884e-13	2.40695e-11	20.628
DUSP6	0.940065	9.02214	8.47331	1.25043e-13	2.43557e-11	20.6031
TRAF3IP2	-0.683431	8.5491	-8.47264	1.25478e-13	2.43557e-11	20.5997
UBE2A	-0.703753	9.09365	-8.46596	1.29893e-13	2.47888e-11	20.5661
MPP7	-1.28342	7.69066	-8.44627	1.43832e-13	2.72202e-11	20.4669
ACKR2	-1.12013	6.56569	-8.44406	1.45488e-13	2.7306e-11	20.4558
OXR1	-0.871142	7.90887	-8.43535	1.52196e-13	2.82236e-11	20.412
CPT1A	-1.16173	9.35792	-8.4345	1.52862e-13	2.82236e-11	20.4077
AQP8	-4.70637	7.73812	-8.43057	1.56005e-13	2.85716e-11	20.3879
BSG	-0.759411	10.6734	-8.4279	1.58172e-13	2.87367e-11	20.3745
CIPC	-1.12683	7.9501	-8.41856	1.66007e-13	2.99208e-11	20.3275
SLC17A9	0.90871	8.40812	8.41382	1.70127e-13	3.0422e-11	20.3036
NMT2	-0.864618	7.42236	-8.40757	1.75711e-13	3.11749e-11	20.2722
CYP2B6	-2.87393	6.87818	-8.37641	2.06427e-13	3.63407e-11	20.1155
TAPBP	0.624321	10.8734	8.36941	2.14026e-13	3.71497e-11	20.0803
HLA-DRA	1.79416	10.8209	8.36917	2.14294e-13	3.71497e-11	20.0791
SETD9	-1.11339	5.95515	-8.34304	2.45259e-13	4.21957e-11	19.9478
STXBP1	1.10579	8.47495	8.34054	2.48439e-13	4.24214e-11	19.9353
SLC45A2	-0.717511	5.1263	-8.3389	2.50556e-13	4.24637e-11	19.927
PUS10	-0.929051	6.3478	-8.31628	2.81596e-13	4.70224e-11	19.8134
TTYH3	0.966745	8.7348	8.29413	3.15674e-13	5.23282e-11	19.7023
MKRN1	-0.748095	9.83044	-8.26517	3.66521e-13	5.98827e-11	19.557
MEP1B	-3.02779	5.76949	-8.25403	3.88166e-13	6.29661e-11	19.5012
TRHDE	-1.66226	5.42903	-8.25178	3.92688e-13	6.32479e-11	19.4899
DOCK1	-0.708441	8.45601	-8.23107	4.36898e-13	6.98729e-11	19.3862
HOXA2	-1.1925	6.4371	-8.22365	4.53924e-13	7.20882e-11	19.349
MIER1	-0.666239	8.68561	-8.19586	5.23726e-13	8.24647e-11	19.2099
AVIL	-0.992329	7.01918	-8.19482	5.26525e-13	8.24647e-11	19.2047
PAG1	-1.11907	8.69268	-8.1867	5.48997e-13	8.53953e-11	19.1641
CD82	1.28306	9.23623	8.18479	5.54415e-13	8.56514e-11	19.1545
AK3	-0.676928	8.73705	-8.18267	5.6048e-13	8.60033e-11	19.1439
DPP10	-1.64001	5.18098	-8.1666	6.08789e-13	9.27893e-11	19.0635
ARHGEF3	0.829493	7.51163	8.15867	6.34087e-13	9.60008e-11	19.0239
EPB41L3	-0.913805	8.12996	-8.15198	6.56282e-13	9.8703e-11	18.9905
PLCD1	-1.56399	8.00022	-8.149	6.66412e-13	9.95672e-11	18.9756
CNTN4	-1.2025	5.42999	-8.14606	6.76555e-13	1.00422e-10	18.9609
IFT74	-1.01067	6.66196	-8.1411	6.9402e-13	1.02345e-10	18.9361
BMP3	-2.73168	7.11385	-8.10852	8.20436e-13	1.19436e-10	18.7734
PGM2L1	0.84161	7.66885	8.09688	8.70908e-13	1.25451e-10	18.7153
INPP5J	-0.988901	7.03218	-8.09646	8.72797e-13	1.25451e-10	18.7132
RUNDC3B	-1.33328	6.17589	-8.05392	1.08561e-12	1.55057e-10	18.501
PSD3	-0.969778	7.41145	-8.0508	1.10309e-12	1.56291e-10	18.4855
EIF5A2	0.983352	6.7267	8.04993	1.108e-12	1.56291e-10	18.4812
C1orf115	-0.914142	8.09087	-8.04309	1.14754e-12	1.60455e-10	18.4471
PTGR1	-1.02889	7.13351	-8.04121	1.15864e-12	1.60455e-10	18.4377
NWD2	-0.612999	5.32706	-8.0412	1.15873e-12	1.60455e-10	18.4376
TESK2	-0.928207	7.64846	-8.01972	1.29351e-12	1.77402e-10	18.3306
HLA-DRB1	1.49572	10.4911	8.01923	1.29673e-12	1.77402e-10	18.3282
FMO4	-1.40028	6.68573	-7.99188	1.49156e-12	1.99255e-10	18.1921
TMEM173	0.907848	9.04861	7.98782	1.52288e-12	2.02249e-10	18.1719
ZNF439	-0.719174	5.74851	-7.9814	1.57371e-12	2.06711e-10	18.14
ALDH18A1	-0.891003	9.02957	-7.98128	1.57468e-12	2.06711e-10	18.1394
MPP5	-0.940998	7.92421	-7.96807	1.68474e-12	2.19888e-10	18.0737
BACE2	1.23969	10.0951	7.96064	1.74995e-12	2.27093e-10	18.0368
AGTRAP	0.671794	8.56212	7.95536	1.79782e-12	2.3198e-10	18.0105
FNIP2	-1.0006	9.14909	-7.94436	1.90181e-12	2.44012e-10	17.9559
ASPHD2	1.15977	7.72808	7.92929	2.054e-12	2.62058e-10	17.881
GBA3	-1.82385	5.74293	-7.92048	2.14847e-12	2.72579e-10	17.8373
LRRFIP2	-0.580941	8.60682	-7.91387	2.22226e-12	2.80376e-10	17.8045
SLC27A4	-0.834455	8.71912	-7.8893	2.51909e-12	3.16069e-10	17.6826
MAST2	-0.978496	9.07338	-7.88518	2.57252e-12	3.21e-10	17.6622
MOCS1	-0.770067	6.58552	-7.88271	2.60519e-12	3.233e-10	17.6499
MAP3K6	0.609961	8.00146	7.87617	2.69349e-12	3.32441e-10	17.6175
RNU6-353P	-0.671308	4.88922	-7.8619	2.89667e-12	3.55586e-10	17.5468
HSD17B2	-1.76457	8.53103	-7.85514	2.9982e-12	3.6607e-10	17.5133
IFITM3	1.26931	8.76657	7.84798	3.10957e-12	3.75629e-10	17.4779
TRIM22	1.63561	7.83866	7.83417	3.33617e-12	4.0087e-10	17.4095
KDELR3	1.35387	9.54136	7.82344	3.52358e-12	4.2116e-10	17.3564
BTBD3	-0.762632	8.41357	-7.82003	3.58515e-12	4.25924e-10	17.3396
RNU6-1206P	-0.929146	4.49306	-7.81917	3.60094e-12	4.25924e-10	17.3353
PAQR5	-1.70174	7.64373	-7.81325	3.71114e-12	4.36684e-10	17.306
PPP2R3A	-1.36362	6.67783	-7.8087	3.79797e-12	4.42317e-10	17.2835
CLIP2	-0.688782	7.80501	-7.80222	3.92518e-12	4.54404e-10	17.2515
PKIB	-1.54988	7.4013	-7.7993	3.98395e-12	4.5465e-10	17.237
AUH	-0.623055	7.88266	-7.78167	4.35766e-12	4.92351e-10	17.1499
RBKS	-0.933496	6.28062	-7.77801	4.43939e-12	4.99101e-10	17.1318
XBP1	1.20202	11.3742	7.77638	4.47647e-12	5.00792e-10	17.1237
EIF4EBP2	-0.841045	10.7194	-7.77028	4.61727e-12	5.14011e-10	17.0936
NPY1R	-1.24257	4.5772	-7.76924	4.6418e-12	5.14221e-10	17.0885
EPB41L1	-0.697891	7.19605	-7.75922	4.88416e-12	5.38443e-10	17.039
IRS1	1.01926	7.68328	7.73976	5.39148e-12	5.915e-10	16.943
PODXL	1.09184	9.17277	7.73202	5.60745e-12	6.06406e-10	16.9048
GRAMD1C	-0.984032	6.78929	-7.71942	5.97765e-12	6.43377e-10	16.8427
FAHD1	-1.07028	7.15628	-7.71826	6.01293e-12	6.4412e-10	16.837
SLC51A	-1.65913	6.75783	-7.7154	6.10069e-12	6.50454e-10	16.8229
PITPNC1	1.51225	8.53468	7.71043	6.25646e-12	6.63945e-10	16.7984
CPEB3	-0.614606	6.93711	-7.68613	7.07647e-12	7.47473e-10	16.6787
RHOU	-1.26775	8.9734	-7.6793	7.32562e-12	7.66658e-10	16.6451
CTSV	-0.895825	5.47856	-7.6745	7.50594e-12	7.81926e-10	16.6214
BHLHE40	1.26624	9.21593	7.66698	7.79742e-12	8.04907e-10	16.5844
TSEN2	-0.657682	6.76771	-7.65876	8.12866e-12	8.20453e-10	16.544
GRAMD3	-1.09063	8.52142	-7.64531	8.70143e-12	8.70517e-10	16.4778
SLC51B	-1.88154	8.51171	-7.64444	8.73967e-12	8.70517e-10	16.4736
PKM	0.813876	10.6516	7.63893	8.98685e-12	8.87353e-10	16.4465
EFNA1	-1.43226	7.56864	-7.62115	9.83198e-12	9.66599e-10	16.3591
P2RY1	-1.02317	7.46214	-7.58384	1.18714e-11	1.14723e-09	16.176
VWA1	0.614189	8.51809	7.57415	1.24667e-11	1.19614e-09	16.1285
CAT	-0.748281	9.28273	-7.56966	1.27524e-11	1.21683e-09	16.1064
SETD7	0.816602	8.9744	7.56708	1.29192e-11	1.22759e-09	16.0938
ERBB2IP	-0.643264	10.0202	-7.56099	1.33222e-11	1.26061e-09	16.064
PDK2	-1.4998	8.14241	-7.54811	1.42166e-11	1.3346e-09	16.0008
TRPV3	-0.96994	6.36802	-7.54804	1.42216e-11	1.3346e-09	16.0005
ZNF608	-0.78862	7.40938	-7.53846	1.49251e-11	1.39485e-09	15.9536
FAM213A	-0.851224	8.05731	-7.5368	1.50507e-11	1.40082e-09	15.9455
CHRNA1	-0.865272	6.15586	-7.53511	1.5179e-11	1.407e-09	15.9372
ARFGAP3	1.18185	8.64497	7.52943	1.56202e-11	1.44201e-09	15.9094
SLC5A12	-0.765867	5.3151	-7.51871	1.64865e-11	1.51206e-09	15.8569
TMEM56	-1.81589	8.25832	-7.5184	1.65121e-11	1.51206e-09	15.8554
PHYH	-1.11938	7.67756	-7.51545	1.67599e-11	1.52858e-09	15.841
PMM1	-0.806335	7.35694	-7.51402	1.68803e-11	1.53341e-09	15.834
RPS6KA6	-1.74452	6.61148	-7.5109	1.7148e-11	1.55152e-09	15.8187
GNA15	1.54954	8.40285	7.5054	1.7629e-11	1.58047e-09	15.7919
HEATR5A	-0.591139	8.41106	-7.50487	1.76767e-11	1.58047e-09	15.7892
HOXA6	-1.29366	7.68958	-7.4946	1.86136e-11	1.65771e-09	15.7391
HADHA	-0.647939	10.0856	-7.49029	1.90222e-11	1.68748e-09	15.718
RAVER2	-1.45306	9.31376	-7.47695	2.03424e-11	1.7906e-09	15.6528
PHLDA1	1.8199	8.70341	7.46594	2.14993e-11	1.88513e-09	15.5991
TBXAS1	1.03025	8.24	7.46442	2.16642e-11	1.89228e-09	15.5917
RNU6-795P	-0.584413	5.82716	-7.45111	2.31626e-11	2.00772e-09	15.5267
MAPRE3	-1.09381	7.27923	-7.42779	2.60394e-11	2.2485e-09	15.413
S100P	1.61923	9.68067	7.41399	2.7906e-11	2.39149e-09	15.3458
MCMDC2	-0.602917	5.07694	-7.39924	3.00482e-11	2.56539e-09	15.2739
ABCB11	-0.758184	5.09028	-7.39136	3.12593e-11	2.65879e-09	15.2356
MT1H	-1.87577	8.58661	-7.38819	3.17597e-11	2.68269e-09	15.2201
PAM	0.877841	8.22698	7.38808	3.17764e-11	2.68269e-09	15.2196
OSBPL1A	-0.800101	7.10972	-7.38363	3.24942e-11	2.73312e-09	15.1979
MAML2	-0.616472	8.70605	-7.38199	3.27608e-11	2.74538e-09	15.19
MAGI1	-0.895141	7.99746	-7.37981	3.31205e-11	2.76532e-09	15.1794
SLC17A4	-2.54974	7.34872	-7.37792	3.3436e-11	2.77805e-09	15.1702
HLA-DMA	1.52595	9.89667	7.37743	3.35177e-11	2.77805e-09	15.1678
PP12719	-0.801046	6.31294	-7.36417	3.5819e-11	2.958e-09	15.1033
PITX2	-0.696887	5.89267	-7.35506	3.74894e-11	3.08473e-09	15.0591
PBLD	-1.96212	7.52335	-7.35257	3.79602e-11	3.11219e-09	15.047
AQP7	-0.645036	6.729	-7.3504	3.83737e-11	3.13477e-09	15.0364
SCUBE2	-1.21746	6.67705	-7.346	3.92283e-11	3.1931e-09	15.015
VTI1B	-0.592865	8.27713	-7.34156	4.01086e-11	3.25309e-09	14.9935
LOC400590	-0.697836	7.47695	-7.33665	4.11055e-11	3.32209e-09	14.9697
USP30	-1.07282	8.52616	-7.33594	4.1253e-11	3.32219e-09	14.9662
TDP2	-1.27976	9.49325	-7.33173	4.21304e-11	3.38085e-09	14.9458
DEPDC7	-0.860205	6.02414	-7.31744	4.52487e-11	3.6183e-09	14.8764
CDKN2B	-1.49716	8.60007	-7.31437	4.59475e-11	3.66129e-09	14.8615
CSNK1E	0.634889	8.52087	7.30906	4.71827e-11	3.74657e-09	14.8358
FABP3	-0.864928	5.78256	-7.30672	4.77374e-11	3.74812e-09	14.8244
CDC42BPA	-0.6747	8.457	-7.30646	4.7799e-11	3.74812e-09	14.8232
ACSF2	-2.10439	7.73201	-7.30619	4.78624e-11	3.74812e-09	14.8219
PACS1	0.916819	8.58487	7.30423	4.83351e-11	3.76952e-09	14.8124
NAAA	-1.49263	9.13068	-7.30122	4.90653e-11	3.80298e-09	14.7978
FAM47E	-0.839968	4.94802	-7.29325	5.10574e-11	3.91727e-09	14.7592
S100A11	1.06955	10.4267	7.28964	5.19845e-11	3.97497e-09	14.7417
CDK20	-0.733204	6.2411	-7.26458	5.89054e-11	4.48906e-09	14.6204
ABCB1	-2.28425	7.48604	-7.26149	5.98187e-11	4.54342e-09	14.6054
ROR2	0.639348	7.02922	7.25283	6.2457e-11	4.69668e-09	14.5635
CD55	1.93084	10.9148	7.24546	6.47938e-11	4.85633e-09	14.5279
SLC7A1	0.836755	9.18755	7.23776	6.73255e-11	5.01299e-09	14.4907
XRCC6BP1	-0.973846	7.38517	-7.23658	6.77233e-11	5.02613e-09	14.4849
SLC30A10	-2.65375	7.53413	-7.23088	6.96703e-11	5.13705e-09	14.4574
TUBAL3	-1.58573	6.63354	-7.22193	7.28431e-11	5.35362e-09	14.4142
ZFP3	-0.841983	7.06179	-7.21734	7.45281e-11	5.45978e-09	14.392
PDK4	-1.36782	8.45867	-7.20832	7.79466e-11	5.67362e-09	14.3485
ANO6	1.36649	8.74827	7.19879	8.17265e-11	5.92974e-09	14.3025
CD44	1.38554	10.2695	7.1923	8.44079e-11	6.10478e-09	14.2712
ME2	-0.627299	9.47607	-7.18778	8.63222e-11	6.22342e-09	14.2494
SULT1A1	-0.913736	6.6719	-7.17818	9.05393e-11	6.5068e-09	14.2031
TGM2	2.12645	10.1412	7.1754	9.17986e-11	6.56479e-09	14.1897
NSUN3	-0.662854	7.96332	-7.17079	9.3923e-11	6.68649e-09	14.1675
CPT2	-0.844231	7.93873	-7.16131	9.84466e-11	6.94323e-09	14.1219
FLVCR1	-0.919711	7.25001	-7.15573	1.0121e-10	7.11602e-09	14.095
ASB13	-0.924204	7.60814	-7.14789	1.05225e-10	7.37546e-09	14.0572
WSCD1	-1.1185	6.92005	-7.13796	1.10531e-10	7.67829e-09	14.0095
OAS2	1.65653	7.95153	7.13013	1.14905e-10	7.93157e-09	13.9718
SLFN5	1.49459	8.71482	7.12244	1.19365e-10	8.21451e-09	13.9349
IFI16	1.54912	8.41018	7.11466	1.24056e-10	8.51149e-09	13.8975
TCP11L2	-0.912018	8.11186	-7.10232	1.31868e-10	8.99318e-09	13.8382
EPB41L5	-0.734958	7.44841	-7.09884	1.3416e-10	9.09104e-09	13.8215
UGT2A3	-3.11203	5.66297	-7.09864	1.34293e-10	9.09104e-09	13.8205
ACVR2A	-1.02518	7.41078	-7.09114	1.39366e-10	9.31032e-09	13.7846
TMEM92	1.00489	7.88855	7.09052	1.39798e-10	9.31032e-09	13.7816
VNN1	3.47392	8.51692	7.082	1.45812e-10	9.68244e-09	13.7407
DGKD	-0.775713	9.07114	-7.08061	1.46819e-10	9.7209e-09	13.734
DUSP10	1.11581	7.05803	7.07984	1.47375e-10	9.72929e-09	13.7304
SLC5A11	-0.582955	5.85958	-7.06442	1.59048e-10	1.04695e-08	13.6564
LPCAT3	-0.952371	10.6503	-7.06365	1.59654e-10	1.04791e-08	13.6527
OTOP2	-2.8593	8.35302	-7.06106	1.61708e-10	1.05833e-08	13.6403
RPS6KA2	0.887434	7.71666	7.06003	1.62531e-10	1.06065e-08	13.6354
POLR2H	-0.585171	10.0467	-7.05368	1.67708e-10	1.08846e-08	13.605
IP6K2	-0.654705	7.91738	-7.05363	1.67751e-10	1.08846e-08	13.6047
SDR42E1	-0.870589	6.85873	-7.05054	1.70324e-10	1.10201e-08	13.5899
HLA-DRB3	1.46196	10.6543	7.03903	1.80281e-10	1.15982e-08	13.5348
ZNF350	-0.85269	6.67564	-7.03322	1.85522e-10	1.19017e-08	13.507
HOXA5	-0.889114	7.26238	-7.02546	1.92761e-10	1.23313e-08	13.4699
ASTE1	-0.684051	6.44491	-7.02245	1.95646e-10	1.24457e-08	13.4555
METTL7B	-1.27906	8.31094	-7.01914	1.98859e-10	1.26148e-08	13.4397
NIPSNAP3A	-0.995508	8.06684	-7.01702	2.00953e-10	1.27121e-08	13.4295
SUOX	-0.794456	7.28337	-7.0129	2.05068e-10	1.28769e-08	13.4099
SGK2	-1.6962	8.19808	-7.01271	2.0526e-10	1.28769e-08	13.409
MICU2	-0.669873	8.49089	-7.0081	2.09979e-10	1.31367e-08	13.3869
MINPP1	-0.795854	8.53336	-7.0074	2.10705e-10	1.31459e-08	13.3836
SLC30A4	-0.803101	8.05257	-6.99315	2.2602e-10	1.40243e-08	13.3155
SERPINA1	1.17034	10.4712	6.98982	2.29748e-10	1.41782e-08	13.2996
ARMCX2	0.595489	6.19521	6.98421	2.3618e-10	1.44963e-08	13.2729
REG4	2.65091	10.0445	6.98041	2.40645e-10	1.46516e-08	13.2547
HMGCS2	-3.97265	8.85156	-6.97843	2.43001e-10	1.47555e-08	13.2452
BCL2L10	-0.711369	6.38244	-6.97227	2.50476e-10	1.51021e-08	13.2159
IFI6	1.37027	9.70402	6.97208	2.50705e-10	1.51021e-08	13.215
MKKS	-0.797035	6.44972	-6.96761	2.56277e-10	1.5397e-08	13.1937
PEX26	-0.886127	9.10287	-6.96633	2.57899e-10	1.54535e-08	13.1875
MGAT4A	-0.9204	9.3438	-6.96401	2.60856e-10	1.55896e-08	13.1765
GRINA	0.751524	8.83111	6.96229	2.63067e-10	1.56805e-08	13.1683
KRCC1	-0.970063	8.51337	-6.95747	2.69366e-10	1.59721e-08	13.1453
LCN2	2.98517	11.0348	6.95218	2.76469e-10	1.63505e-08	13.1201
DSCR3	-0.636458	9.23212	-6.94726	2.83225e-10	1.67022e-08	13.0967
HNMT	-0.890067	7.196	-6.94659	2.84156e-10	1.67022e-08	13.0935
ZSCAN31	-0.712174	5.64205	-6.94626	2.84621e-10	1.67022e-08	13.0919
PLCL2	-0.617778	7.41735	-6.94436	2.87289e-10	1.68153e-08	13.0829
MPZL3	-0.628316	8.26595	-6.9427	2.89636e-10	1.68243e-08	13.075
PEX11A	-0.772553	7.19833	-6.94268	2.89665e-10	1.68243e-08	13.0749
HOXA3	-0.753345	6.82318	-6.92738	3.12254e-10	1.79526e-08	13.0021
DDAH2	-0.745345	8.23372	-6.92032	3.23266e-10	1.84457e-08	12.9685
JUNB	1.02947	10.3666	6.91947	3.24617e-10	1.84763e-08	12.9644
FDX1P1	-0.600162	5.93692	-6.91551	3.30978e-10	1.87913e-08	12.9456
TMEM252	-0.618368	5.22305	-6.9081	3.43213e-10	1.9389e-08	12.9104
APPL2	-1.11044	9.27506	-6.90677	3.45474e-10	1.94683e-08	12.904
SGMS1	0.795751	7.93685	6.90587	3.46992e-10	1.95054e-08	12.8998
RMND5A	-1.15934	8.79392	-6.90488	3.48678e-10	1.95139e-08	12.8951
ETNK1	-0.893145	8.49674	-6.90477	3.48861e-10	1.95139e-08	12.8946
GUCA2B	-2.06993	9.27749	-6.90425	3.49765e-10	1.95164e-08	12.8921
LYZ	1.53618	11.9043	6.89897	3.58923e-10	1.98808e-08	12.867
SLC25A33	-0.829795	6.90378	-6.89607	3.64065e-10	2.01166e-08	12.8532
LYRM7	-0.772063	6.28478	-6.89309	3.69421e-10	2.02646e-08	12.839
MAGED2	0.60432	8.56316	6.88546	3.83471e-10	2.09342e-08	12.8029
PCCA	-1.06677	8.17461	-6.88322	3.87698e-10	2.10672e-08	12.7922
ARHGAP35	-0.598671	8.88841	-6.88319	3.87763e-10	2.10672e-08	12.7921
CNTN3	-1.68377	5.81072	-6.8686	4.16461e-10	2.2364e-08	12.7228
ABCD3	-0.937841	9.02041	-6.86832	4.17035e-10	2.2364e-08	12.7215
LCMT1	-0.608738	8.33756	-6.86807	4.1754e-10	2.2364e-08	12.7203
ADH6	-1.56237	6.76247	-6.8659	4.22002e-10	2.25498e-08	12.71
PI3	2.39405	10.053	6.85458	4.46e-10	2.36099e-08	12.6564
PMP22	1.28636	9.89661	6.83889	4.8155e-10	2.54326e-08	12.5821
CDH3	2.53457	8.37633	6.83777	4.84178e-10	2.5512e-08	12.5768
TMEM258	0.660455	9.65847	6.83585	4.88742e-10	2.56929e-08	12.5677
AMY2B	-0.884152	5.96856	-6.827	5.10325e-10	2.67039e-08	12.5258
IQGAP2	-1.03909	9.5863	-6.81937	5.29692e-10	2.76536e-08	12.4897
CDC25B	1.24138	8.11829	6.81764	5.34173e-10	2.78235e-08	12.4815
CCDC146	-0.736613	6.64442	-6.81481	5.41601e-10	2.81459e-08	12.4681
F3	1.23015	8.39083	6.80954	5.55687e-10	2.87219e-08	12.4432
OPN3	-0.885981	8.355	-6.80942	5.56028e-10	2.87219e-08	12.4427
NUP188	0.591221	8.49754	6.80925	5.56479e-10	2.87219e-08	12.4419
C14orf142	-0.649038	8.13331	-6.80049	5.80772e-10	2.99078e-08	12.4005
RNU4-38P	-0.888562	4.80549	-6.79992	5.8237e-10	2.99222e-08	12.3978
TRIM36	-0.952952	6.46115	-6.79447	5.98044e-10	3.05891e-08	12.372
CXCL1	2.81584	10.0966	6.78387	6.29737e-10	3.1994e-08	12.322
ST3GAL2	0.981804	8.05339	6.78206	6.35299e-10	3.22045e-08	12.3135
SLC20A2	-1.08302	8.80003	-6.77967	6.42753e-10	3.25098e-08	12.3022
C8orf4	1.42784	7.42527	6.77873	6.45682e-10	3.25854e-08	12.2978
SENP8	-0.638569	6.65417	-6.7693	6.76028e-10	3.39659e-08	12.2533
G6PC	-0.964691	5.00405	-6.76441	6.92311e-10	3.45808e-08	12.2302
NR6A1	-0.651476	6.60538	-6.76425	6.92835e-10	3.45808e-08	12.2295
SEC22C	0.836709	7.56325	6.75917	7.10159e-10	3.53678e-08	12.2055
NCALD	0.70924	6.50245	6.75578	7.21951e-10	3.58764e-08	12.1896
LRIG2	-0.58894	7.32592	-6.74225	7.71055e-10	3.79799e-08	12.1258
SLC36A1	-1.31587	8.15847	-6.73278	8.07311e-10	3.95984e-08	12.0813
HSD3BP4	-0.821654	6.01332	-6.7278	8.27086e-10	4.04809e-08	12.0578
TMEM37	-1.54579	8.82579	-6.72376	8.43477e-10	4.11059e-08	12.0388
NCKAP5	-0.769197	5.64635	-6.72152	8.52698e-10	4.14663e-08	12.0283
CTSA	-0.621372	10.6769	-6.71013	9.01128e-10	4.36346e-08	11.9747
ZYX	0.828646	9.27365	6.70842	9.08653e-10	4.39053e-08	11.9667
TRIB2	1.5904	7.59925	6.70593	9.19647e-10	4.43422e-08	11.955
C15orf38-AP3S2	-0.716986	9.84772	-6.68825	1.00194e-09	4.80788e-08	11.872
UBE2L6	0.768148	8.19983	6.68768	1.00469e-09	4.80788e-08	11.8693
ZNF429	-1.08019	6.29357	-6.68745	1.00585e-09	4.80788e-08	11.8682
PDZD3	-1.39239	7.04009	-6.68736	1.00625e-09	4.80788e-08	11.8678
PPARG	-1.32171	9.03859	-6.68706	1.00773e-09	4.80788e-08	11.8664
RN7SL541P	-0.726668	5.34242	-6.68644	1.01078e-09	4.81232e-08	11.8635
METTL7A	-1.12898	8.10103	-6.67792	1.05334e-09	4.99403e-08	11.8235
C6orf203	-0.600593	6.65408	-6.67745	1.05572e-09	4.99488e-08	11.8214
FAIM2	0.872994	7.19943	6.67457	1.07056e-09	5.05454e-08	11.8078
SEC13	0.596602	9.31947	6.67413	1.07281e-09	5.05468e-08	11.8058
IL1RN	2.34517	7.9785	6.672	1.08392e-09	5.09647e-08	11.7958
HSDL2	-0.885402	7.86135	-6.6714	1.08711e-09	5.09818e-08	11.793
CYP2R1	-0.626633	7.52206	-6.66633	1.11411e-09	5.20606e-08	11.7692
LIPG	1.13939	8.53513	6.65679	1.16672e-09	5.4194e-08	11.7245
UBE2S	0.635003	7.70767	6.65638	1.16902e-09	5.4194e-08	11.7226
ANXA5	1.28047	10.2346	6.65486	1.17766e-09	5.44697e-08	11.7155
HIST1H3E	-0.815921	6.23519	-6.65352	1.18527e-09	5.47104e-08	11.7092
PLS3	1.03771	7.95869	6.65073	1.20137e-09	5.52288e-08	11.6962
TRIB1	0.841629	9.97525	6.64759	1.21977e-09	5.58488e-08	11.6814
PML	0.773777	7.96471	6.64564	1.23129e-09	5.60524e-08	11.6723
CD81	0.848804	10.9795	6.64298	1.24722e-09	5.65355e-08	11.6599
COTL1	0.649043	9.2586	6.64257	1.24972e-09	5.65362e-08	11.6579
GCOM1	-0.932938	7.24067	-6.63659	1.2863e-09	5.796e-08	11.63
SLC3A1	-1.30695	6.50706	-6.63429	1.30067e-09	5.84915e-08	11.6192
HOXA4	-0.613165	6.00585	-6.62427	1.36515e-09	6.09087e-08	11.5724
HM13	0.681332	9.30615	6.62332	1.37142e-09	6.10684e-08	11.5679
EXOC6B	-0.614022	8.57656	-6.61846	1.404e-09	6.22751e-08	11.5452
SVOPL	-0.594546	5.41237	-6.60369	1.50764e-09	6.64826e-08	11.4762
SLC17A8	-0.604112	5.36331	-6.59492	1.57266e-09	6.86829e-08	11.4353
CLN5	-0.657875	7.94548	-6.59339	1.58432e-09	6.89272e-08	11.4282
ADIRF	-0.746694	7.35404	-6.59241	1.59181e-09	6.90853e-08	11.4236
BTN3A1	0.797955	8.27737	6.57809	1.70545e-09	7.34929e-08	11.3568
NUDT7	-1.00228	7.69631	-6.57381	1.7409e-09	7.48784e-08	11.3369
ACADS	-1.11258	8.85121	-6.56714	1.79768e-09	7.7029e-08	11.3058
CNIH4	-0.591575	9.17104	-6.56009	1.85967e-09	7.92367e-08	11.273
PRKAB2	-0.654978	8.02332	-6.55698	1.88766e-09	8.02786e-08	11.2585
TMEM133	-0.764483	7.63932	-6.55427	1.91246e-09	8.10297e-08	11.2459
SSR1	0.756154	10.526	6.54594	1.99054e-09	8.38306e-08	11.2072
KIAA1107	-0.81493	6.01881	-6.54572	1.99269e-09	8.38306e-08	11.2061
CNGA1	-1.06556	4.93809	-6.54565	1.99333e-09	8.38306e-08	11.2058
SLC41A1	0.9413	7.54874	6.53852	2.06275e-09	8.65899e-08	11.1727
MT1DP	-0.851867	8.79482	-6.53776	2.07032e-09	8.67473e-08	11.1691
P2RX4	-0.982749	8.57468	-6.53634	2.08445e-09	8.71783e-08	11.1625
TMCC3	-0.853075	9.446	-6.53012	2.14766e-09	8.94926e-08	11.1336
MT1JP	-1.02897	7.18032	-6.51967	2.25808e-09	9.3238e-08	11.0851
MXRA5	2.09406	9.02458	6.51667	2.29076e-09	9.4416e-08	11.0712
ADAMTS9	1.70507	7.91166	6.51596	2.2986e-09	9.45674e-08	11.0678
CALU	1.178	8.82036	6.51543	2.3044e-09	9.46345e-08	11.0654
IGSF9	-1.05255	7.83248	-6.51006	2.36455e-09	9.64839e-08	11.0405
SLC9A3R1	-0.914524	10.1274	-6.50989	2.36643e-09	9.64839e-08	11.0397
SLC28A3	1.3461	7.37581	6.50668	2.40309e-09	9.77739e-08	11.0248
MCOLN2	-1.6762	7.60695	-6.50637	2.40667e-09	9.77739e-08	11.0234
GAREM	-0.677831	8.36718	-6.50527	2.41948e-09	9.79436e-08	11.0182
SEMA5A	-1.23541	8.66854	-6.50478	2.42514e-09	9.79983e-08	11.016
RAC2	1.37481	9.66382	6.50189	2.45894e-09	9.91876e-08	11.0026
DAPK2	-0.71371	8.23149	-6.48162	2.70949e-09	1.08141e-07	10.9087
GLB1L2	-1.07805	8.17497	-6.48069	2.72157e-09	1.08322e-07	10.9043
ANKH	-0.840865	8.5567	-6.48038	2.72564e-09	1.08322e-07	10.9029
UGDH	-0.927007	10.8734	-6.47765	2.76146e-09	1.09446e-07	10.8903
C11orf53	-0.756246	5.7584	-6.4711	2.8493e-09	1.1234e-07	10.86
MRPL34	-0.610148	7.92131	-6.46945	2.87188e-09	1.12838e-07	10.8523
ANKDD1B	-0.766172	5.51228	-6.46448	2.94092e-09	1.15351e-07	10.8293
AGRN	0.639141	8.35546	6.46367	2.95233e-09	1.15599e-07	10.8256
GDE1	-0.627029	8.65898	-6.45412	3.09016e-09	1.19961e-07	10.7814
KCND3	1.63516	7.40427	6.45352	3.09911e-09	1.20104e-07	10.7786
ASRGL1	0.962296	8.1565	6.4491	3.16516e-09	1.22048e-07	10.7582
TPRG1L	-0.710696	9.15928	-6.44906	3.16577e-09	1.22048e-07	10.758
CCDC112	-0.746313	5.89253	-6.44873	3.17077e-09	1.22048e-07	10.7565
CFB	1.87428	9.81776	6.44212	3.27242e-09	1.25323e-07	10.726
LOC642947	-0.806619	5.67954	-6.43933	3.31633e-09	1.26791e-07	10.7131
SSTR1	-0.72329	7.44283	-6.43841	3.33089e-09	1.27134e-07	10.7088
VTRNA1-3	0.90397	6.43381	6.43677	3.35705e-09	1.27917e-07	10.7012
PPARGC1A	-1.92031	7.72935	-6.43014	3.4649e-09	1.31805e-07	10.6707
HMGA2	-0.68279	6.47958	-6.429	3.48389e-09	1.32306e-07	10.6654
ARNTL2	1.48588	7.51188	6.42701	3.5171e-09	1.32901e-07	10.6562
SULT1A2	-1.65975	7.92119	-6.42149	3.61087e-09	1.35766e-07	10.6307
ZC3H12A	1.22878	9.05541	6.42024	3.63244e-09	1.36352e-07	10.625
AFG3L2	-0.734243	8.48802	-6.41906	3.6528e-09	1.3673e-07	10.6195
MSTO1	0.619837	7.8523	6.4118	3.78149e-09	1.41014e-07	10.586
SYVN1	0.590537	9.39211	6.41002	3.81362e-09	1.418e-07	10.5779
ANO10	-0.770956	9.1264	-6.40994	3.81504e-09	1.418e-07	10.5775
CARD6	1.3629	6.04238	6.40737	3.86206e-09	1.43079e-07	10.5656
UGP2	-1.01762	9.71261	-6.4068	3.87258e-09	1.43235e-07	10.563
LRP8	1.12617	8.18153	6.40567	3.8934e-09	1.43771e-07	10.5578
ZFPM2	0.848475	6.8788	6.40056	3.98945e-09	1.46603e-07	10.5342
SNORD3B-1	1.32627	10.3668	6.39886	4.02183e-09	1.47554e-07	10.5264
ACAA2	-0.937743	8.85891	-6.3982	4.03444e-09	1.47778e-07	10.5234
NCOA7	1.01999	7.65272	6.39406	4.11475e-09	1.50062e-07	10.5043
LIAS	-0.704318	6.4084	-6.39236	4.14818e-09	1.5097e-07	10.4965
SLC9A7	0.943193	7.13221	6.39132	4.16879e-09	1.51477e-07	10.4917
MYC	0.656778	8.36929	6.38452	4.30576e-09	1.56204e-07	10.4604
UGT1A1	-1.36336	7.22401	-6.38315	4.33397e-09	1.56977e-07	10.4541
BPHL	-0.72783	7.08733	-6.38134	4.37134e-09	1.58078e-07	10.4458
STX3	-0.740648	8.66366	-6.37626	4.47819e-09	1.61428e-07	10.4224
SLC26A2	-3.64442	9.07192	-6.37138	4.58334e-09	1.64696e-07	10.4
ZHX2	0.696195	8.09876	6.37064	4.59947e-09	1.65014e-07	10.3966
CXorf23	-0.748471	6.5245	-6.36913	4.63256e-09	1.65939e-07	10.3897
MYO1D	-1.03258	10.226	-6.36675	4.68523e-09	1.67562e-07	10.3787
MTCL1	0.627102	6.80973	6.36193	4.79372e-09	1.71172e-07	10.3566
CEBPD	0.693959	9.43067	6.35936	4.85249e-09	1.72998e-07	10.3448
FUT8	1.2105	8.87621	6.35846	4.87331e-09	1.73469e-07	10.3407
FGFR3	-1.00354	7.75516	-6.35791	4.8861e-09	1.73652e-07	10.3381
PLK2	1.05359	7.28179	6.34856	5.10771e-09	1.81244e-07	10.2952
LMTK2	-0.662474	9.04745	-6.34699	5.14595e-09	1.82316e-07	10.288
FASTKD1	-0.796552	7.3174	-6.34587	5.17319e-09	1.82711e-07	10.2829
TMEM220	-0.948162	6.76553	-6.34528	5.18775e-09	1.82936e-07	10.2802
MT1M	-2.39381	8.65314	-6.34496	5.19568e-09	1.82936e-07	10.2787
MIR215	-1.88001	4.8645	-6.34022	5.31389e-09	1.86261e-07	10.2569
TINAG	-1.54283	6.69294	-6.34018	5.31472e-09	1.86261e-07	10.2568
PECR	-0.882182	6.98029	-6.3319	5.52763e-09	1.93424e-07	10.2188
ACOT8	-0.736496	8.22139	-6.33071	5.55881e-09	1.94216e-07	10.2134
CYP4X1	1.24117	6.7073	6.32968	5.58598e-09	1.94866e-07	10.2086
ZCCHC14	-0.744319	7.63113	-6.327	5.65744e-09	1.96754e-07	10.1963
SCO1	-0.611018	8.24357	-6.3227	5.77384e-09	2.00495e-07	10.1766
PHF7	-0.698897	6.57968	-6.32171	5.80101e-09	2.00991e-07	10.1721
CLYBL	-1.15094	7.41502	-6.32153	5.80582e-09	2.00991e-07	10.1713
RMRP	0.666946	11.7848	6.31869	5.88442e-09	2.03402e-07	10.1583
SLC41A2	-0.786201	9.43837	-6.30975	6.13873e-09	2.11228e-07	10.1174
AKAP9	-0.735749	8.15204	-6.3093	6.15199e-09	2.11364e-07	10.1153
PTPN13	1.21485	6.6876	6.30858	6.17294e-09	2.11763e-07	10.112
OSMR	2.39707	8.37105	6.30508	6.27608e-09	2.14331e-07	10.096
IFITM1	1.16068	10.3348	6.30354	6.32194e-09	2.15572e-07	10.0889
TMEM170A	-0.886129	9.94048	-6.30134	6.38795e-09	2.17483e-07	10.0789
TAP1	0.987341	10.6129	6.30104	6.39712e-09	2.17483e-07	10.0775
HEG1	1.54217	7.99116	6.30028	6.42021e-09	2.17941e-07	10.074
CLSTN3	0.788945	7.44838	6.2961	6.54828e-09	2.21297e-07	10.0549
LPIN1	0.94334	8.60157	6.28989	6.74318e-09	2.26024e-07	10.0266
CD34	1.38181	8.1868	6.28874	6.78014e-09	2.26437e-07	10.0213
CXCL3	1.08769	7.44182	6.28802	6.80326e-09	2.26875e-07	10.018
RNVU1-15	1.05267	7.33051	6.28521	6.89397e-09	2.29227e-07	10.0052
IRAK3	1.96397	7.6422	6.28093	7.03484e-09	2.33569e-07	9.98563
PDZK1	-0.958894	4.939	-6.2797	7.07582e-09	2.34587e-07	9.98001
HSD17B11	-0.939816	10.5736	-6.27573	7.20972e-09	2.38677e-07	9.96188
ETFA	-0.615262	9.62824	-6.26288	7.66066e-09	2.53083e-07	9.90323
MAPKAPK2	0.599245	9.3642	6.2627	7.66715e-09	2.53083e-07	9.90241
RNU6-377P	-0.797159	6.45314	-6.25845	7.82222e-09	2.57453e-07	9.88305
IFITM2	1.32049	8.82661	6.24911	8.17447e-09	2.67873e-07	9.84047
PECAM1	1.98107	9.84641	6.24881	8.18599e-09	2.67873e-07	9.83911
LOC100131796	-0.588006	4.97276	-6.2439	8.37754e-09	2.73354e-07	9.81675
SERPINB5	2.89149	8.54743	6.23697	8.65531e-09	2.82012e-07	9.78521
HYKK	-0.628364	6.82736	-6.23479	8.74463e-09	2.84107e-07	9.77529
PRAP1	-0.751267	7.82371	-6.23303	8.81744e-09	2.85655e-07	9.76727
ZNF137P	-0.605544	5.19106	-6.23045	8.92519e-09	2.88734e-07	9.75553
FXYD5	1.05652	8.54867	6.22902	8.98542e-09	2.90269e-07	9.74903
MT1A	-1.04572	8.99765	-6.22223	9.27708e-09	2.98841e-07	9.71816
PSME2	0.764268	9.65117	6.22125	9.32009e-09	2.99801e-07	9.71368
TRIM29	1.50855	8.17517	6.22075	9.34194e-09	3.00079e-07	9.71142
MIF	0.6745	9.76374	6.20613	1.00068e-08	3.19627e-07	9.64497
ALCAM	0.67095	8.71555	6.20187	1.02089e-08	3.25625e-07	9.62564
ACVR1C	-1.30834	7.85756	-6.20009	1.02949e-08	3.27907e-07	9.61754
GRB10	0.772063	7.54242	6.19356	1.06153e-08	3.37167e-07	9.58792
TMEM39A	0.583566	8.69566	6.18325	1.11418e-08	3.5143e-07	9.54114
IFI35	0.724579	8.4764	6.18089	1.12654e-08	3.53856e-07	9.53047
ZNF480	-0.681657	8.53227	-6.17889	1.1372e-08	3.56709e-07	9.52138
PSMB9	1.05676	8.82271	6.17827	1.14048e-08	3.57247e-07	9.51859
FSIP2	-1.55634	5.93964	-6.17484	1.15896e-08	3.61324e-07	9.50306
ZDHHC23	-0.895008	8.33564	-6.17468	1.15986e-08	3.61324e-07	9.50231
IGKV1OR9-1	1.41279	9.25617	6.16525	1.21225e-08	3.76187e-07	9.45962
MT1P3	-1.08364	8.12489	-6.1652	1.21255e-08	3.76187e-07	9.45939
PIM3	0.588201	7.88127	6.15937	1.2461e-08	3.84497e-07	9.43301
NHEJ1	-0.879099	7.48101	-6.15561	1.26826e-08	3.90803e-07	9.41598
CD160	-0.730393	4.97664	-6.15126	1.29434e-08	3.98299e-07	9.39631
APOL1	1.94209	8.71637	6.14964	1.3042e-08	4.00791e-07	9.38898
RGS2	1.72372	8.21989	6.14623	1.32518e-08	4.05592e-07	9.37356
CDKL1	-0.729626	6.15451	-6.14468	1.33479e-08	4.07983e-07	9.36658
FOS	1.97523	9.65731	6.14088	1.35874e-08	4.13632e-07	9.3494
SPPL2A	-0.663384	10.7588	-6.13936	1.36845e-08	4.16031e-07	9.34252
MCFD2	0.745904	8.44914	6.1368	1.38494e-08	4.1992e-07	9.33094
CNNM2	-1.10228	7.92198	-6.13506	1.39625e-08	4.22221e-07	9.32309
MT1G	-1.64357	11.2648	-6.1332	1.40844e-08	4.24236e-07	9.31469
MMP14	0.996452	8.77515	6.12689	1.4506e-08	4.36332e-07	9.2862
ABAT	-0.868859	7.43305	-6.12296	1.47746e-08	4.43239e-07	9.26847
KLHL8	-0.739882	7.05256	-6.12165	1.48651e-08	4.45364e-07	9.26257
MT1F	-1.70052	10.8331	-6.11998	1.49818e-08	4.48271e-07	9.25502
SEC14L1	0.993572	8.45797	6.11915	1.50398e-08	4.49414e-07	9.25128
SDC3	0.657249	7.60842	6.11804	1.51177e-08	4.51146e-07	9.2463
FYN	1.23309	7.67963	6.1169	1.51986e-08	4.52967e-07	9.24114
GXYLT2	-1.41507	6.64022	-6.10919	1.5756e-08	4.68443e-07	9.20635
PRDX6	-1.0629	9.56896	-6.10599	1.59923e-08	4.74212e-07	9.19197
PANK3	-0.653016	9.42261	-6.10596	1.5995e-08	4.74212e-07	9.19181
ITGA5	1.93179	8.88252	6.10538	1.60384e-08	4.74726e-07	9.18919
PLD1	-0.651422	8.48049	-6.10517	1.60542e-08	4.74726e-07	9.18824
PTPRR	-1.46472	7.16463	-6.10057	1.64018e-08	4.83746e-07	9.16755
PHOSPHO2	-0.636005	6.26256	-6.10003	1.64438e-08	4.84356e-07	9.16508
CCDC183	-0.699365	6.47193	-6.09798	1.66013e-08	4.88361e-07	9.15587
FZD3	0.750449	6.67885	6.09739	1.6647e-08	4.88443e-07	9.15321
PGRMC1	-0.580464	10.4527	-6.09739	1.66471e-08	4.88443e-07	9.15321
IGKV1OR9-2	1.52976	9.85233	6.09491	1.68407e-08	4.92851e-07	9.14204
LETM1	-0.687136	8.96265	-6.09345	1.69554e-08	4.95568e-07	9.13549
ATP8A1	-0.811587	8.32603	-6.09112	1.71409e-08	4.99706e-07	9.12497
CCDC89	-0.619332	5.61249	-6.08863	1.73409e-08	5.0424e-07	9.11377
SLC16A9	-2.02522	7.17229	-6.08763	1.74219e-08	5.05949e-07	9.10927
ETS2	0.602342	10.9218	6.08341	1.77676e-08	5.14247e-07	9.09029
C2orf88	-1.01655	7.7947	-6.08284	1.78147e-08	5.14723e-07	9.08774
MIR194-1	-1.55984	4.95814	-6.079	1.81367e-08	5.2336e-07	9.07044
KCNG3	-0.604059	6.63595	-6.07016	1.88979e-08	5.42688e-07	9.03074
ZNF383	-0.618781	7.05924	-6.07012	1.89021e-08	5.42688e-07	9.03052
ELL2P1	1.27871	7.80964	6.06943	1.89624e-08	5.43733e-07	9.02744
SPCS3	0.916668	9.54832	6.06747	1.91359e-08	5.48014e-07	9.01865
SESTD1	0.77887	7.49405	6.06255	1.95795e-08	5.59308e-07	8.99652
CCL20	1.95156	8.47815	6.06128	1.96949e-08	5.61194e-07	8.99084
RNF152	-1.45036	8.02334	-6.06011	1.98028e-08	5.63561e-07	8.98557
ENTPD5	-1.80565	8.88892	-6.05936	1.98716e-08	5.64811e-07	8.98222
ZNF768	-0.636316	7.52835	-6.05868	1.99346e-08	5.65894e-07	8.97916
ACOT13	-0.872867	9.79026	-6.05513	2.02665e-08	5.74204e-07	8.96322
SLC44A1	-0.810644	10.4176	-6.05501	2.02779e-08	5.74204e-07	8.96267
PDIA4	0.818736	10.7014	6.05271	2.04954e-08	5.7964e-07	8.95237
TMEM209	-0.691896	8.82713	-6.04887	2.08647e-08	5.88617e-07	8.93513
BTN3A3	0.800475	7.81377	6.04818	2.09321e-08	5.89785e-07	8.93202
CELSR1	0.600038	7.34318	6.04728	2.10191e-08	5.91503e-07	8.92801
TMCO1	-0.741155	9.98268	-6.04219	2.15221e-08	6.04162e-07	8.90517
DUSP4	1.10421	6.71893	6.04062	2.16792e-08	6.07593e-07	8.89815
ACTN1	0.626972	10.7607	6.04044	2.16978e-08	6.07593e-07	8.89732
RAB4A	-0.737721	7.62291	-6.04015	2.17271e-08	6.07662e-07	8.89602
CHKA	-0.785881	8.29977	-6.0381	2.19344e-08	6.11953e-07	8.88685
DRAM1	1.5291	7.9323	6.0376	2.19857e-08	6.12632e-07	8.8846
ELK3	1.12662	8.09201	6.03697	2.20503e-08	6.13465e-07	8.88177
STRADB	-1.03117	9.47894	-6.03109	2.26604e-08	6.2835e-07	8.85541
PARK2	-0.757011	6.27607	-6.02836	2.29485e-08	6.34015e-07	8.84322
TRPM6	-2.47066	7.62444	-6.02705	2.30888e-08	6.37116e-07	8.83733
CD276	0.603106	8.64925	6.02454	2.33592e-08	6.43795e-07	8.82609
CTNNAL1	0.668268	7.13828	6.02361	2.34603e-08	6.45797e-07	8.82192
NDUFS1	-0.609391	9.18431	-6.02306	2.35194e-08	6.46642e-07	8.81949
TMEM38B	-1.03399	6.94386	-6.02228	2.36051e-08	6.47429e-07	8.81598
MT1HL1	-0.635455	7.99324	-6.01973	2.38857e-08	6.54335e-07	8.80457
HIGD1AP1	-0.876954	9.66943	-6.0141	2.4517e-08	6.70014e-07	8.77939
TGFA	-0.69609	7.09329	-6.01255	2.46945e-08	6.73243e-07	8.77243
SRI	-0.932805	10.8915	-6.01155	2.48091e-08	6.75558e-07	8.76795
SLC14A2	-0.951122	5.76654	-6.00984	2.50057e-08	6.79891e-07	8.76034
LOC100133315	-0.656061	6.81723	-6.00965	2.50281e-08	6.79891e-07	8.75947
MAGED1	0.5881	9.51352	6.0057	2.54901e-08	6.90788e-07	8.74181
PFKFB3	1.73839	9.161	6.00039	2.61248e-08	7.06304e-07	8.71807
DYRK2	-0.68609	9.7116	-5.99249	2.70977e-08	7.30866e-07	8.68278
LRP6	-0.649347	8.18025	-5.99005	2.74048e-08	7.37398e-07	8.6719
SOCS3	2.06438	8.59069	5.98606	2.79156e-08	7.48481e-07	8.65408
PADI2	-2.50432	9.36915	-5.98549	2.79895e-08	7.49576e-07	8.65153
TMEM171	-1.37094	8.621	-5.98412	2.81668e-08	7.53437e-07	8.64543
DHRS11	-1.93602	9.54796	-5.98265	2.83587e-08	7.5723e-07	8.63888
WARS	1.77983	9.95612	5.9774	2.9055e-08	7.74459e-07	8.61547
HLA-DPA1	1.4428	11.5661	5.97632	2.92013e-08	7.76532e-07	8.61062
ZNF415	-0.725423	5.67096	-5.97606	2.92354e-08	7.76532e-07	8.60949
RNF14	-0.580984	9.38869	-5.97487	2.93966e-08	7.79904e-07	8.60418
HIBCH	-0.865332	7.50268	-5.97066	2.99747e-08	7.94268e-07	8.58539
MATN2	-0.828831	7.84797	-5.97037	3.00147e-08	7.94268e-07	8.58411
SP110	1.05526	7.87005	5.97014	3.00457e-08	7.94268e-07	8.58311
PIK3R3	1.01731	8.16473	5.96397	3.09144e-08	8.14463e-07	8.5556
MTHFD2P7	0.729516	7.59338	5.95719	3.18972e-08	8.38408e-07	8.5254
C3	2.14997	9.68781	5.95155	3.27383e-08	8.58529e-07	8.50028
SLC10A5	-1.76427	7.61351	-5.94682	3.34593e-08	8.75415e-07	8.47926
CRYL1	-0.884129	8.41845	-5.94654	3.35023e-08	8.75533e-07	8.47802
EGR1	1.64473	9.96326	5.946	3.35857e-08	8.76507e-07	8.47563
DEFB1	-0.837972	5.11067	-5.94414	3.38748e-08	8.82222e-07	8.46735
PRSS22	0.688822	7.55729	5.94266	3.41069e-08	8.87249e-07	8.46076
FRRS1	-1.02527	8.04273	-5.93983	3.45559e-08	8.97899e-07	8.44815
LOC102725070	-1.2848	5.74947	-5.93846	3.47731e-08	9.01482e-07	8.4421
MPND	-0.726939	7.8797	-5.93089	3.6008e-08	9.30112e-07	8.40843
CXCL2	1.92115	7.79718	5.93037	3.6094e-08	9.30413e-07	8.40613
ABCA12	2.97559	7.52539	5.92518	3.69658e-08	9.50728e-07	8.3831
MTHFD2	0.833001	8.91675	5.9238	3.72023e-08	9.55729e-07	8.37695
HRSP12	-0.80062	7.55654	-5.92313	3.73172e-08	9.56517e-07	8.37397
HMOX1	-0.768364	8.05672	-5.92041	3.7786e-08	9.66352e-07	8.36193
IDO1	3.41393	7.88309	5.90771	4.0059e-08	1.01761e-06	8.30558
FBXL20	-0.592263	7.90282	-5.90546	4.04751e-08	1.02683e-06	8.29561
ELL2	1.01555	8.73918	5.90526	4.05127e-08	1.02683e-06	8.29471
NOS2	2.75843	10.1577	5.90079	4.13532e-08	1.04697e-06	8.2749
RAB17	-0.706084	7.2801	-5.8993	4.16372e-08	1.05299e-06	8.2683
VSIG10	-0.948755	7.85181	-5.89602	4.22689e-08	1.06659e-06	8.25378
PLVAP	1.05279	9.00665	5.89529	4.24116e-08	1.06823e-06	8.25053
CHPT1	-0.881829	9.59122	-5.8952	4.24283e-08	1.06823e-06	8.25014
SELM	0.867457	8.90723	5.89265	4.29285e-08	1.07963e-06	8.23884
KYNU	2.8032	7.44405	5.88578	4.43031e-08	1.11051e-06	8.20844
DENND4C	-0.620413	9.09608	-5.88356	4.47576e-08	1.11943e-06	8.19859
PLA2R1	-0.854395	6.90111	-5.8824	4.49965e-08	1.12394e-06	8.19346
CHP1	-0.645054	11.8407	-5.8822	4.50369e-08	1.12394e-06	8.19259
EPHA2	1.18158	8.93929	5.88072	4.53428e-08	1.13033e-06	8.18607
IL1B	3.04211	8.68423	5.87862	4.57826e-08	1.14005e-06	8.17675
PCSK1	1.79938	7.41907	5.87794	4.59258e-08	1.14236e-06	8.17374
UBD	1.82391	7.2919	5.87538	4.64672e-08	1.15204e-06	8.16244
SLFN13	0.693418	7.11838	5.87263	4.70574e-08	1.1654e-06	8.15027
SMPDL3B	-0.694799	8.61678	-5.87227	4.71336e-08	1.16549e-06	8.14871
CDH5	1.42202	8.30802	5.87074	4.74654e-08	1.1704e-06	8.14194
PDCD4	-1.24075	9.43283	-5.86787	4.80949e-08	1.18207e-06	8.12923
MLKL	1.04863	7.95251	5.86732	4.82159e-08	1.18358e-06	8.12681
HIF1A	1.144	11.0093	5.86633	4.84353e-08	1.18659e-06	8.12243
APLNR	1.11635	7.77346	5.8649	4.87528e-08	1.19308e-06	8.11613
SCIN	-1.59705	7.54055	-5.8626	4.92687e-08	1.20182e-06	8.10598
VWF	1.68889	7.87217	5.8609	4.96555e-08	1.20908e-06	8.09844
CTSH	1.20864	9.0325	5.86082	4.96728e-08	1.20908e-06	8.0981
PDZK1IP1	1.62195	10.281	5.85962	4.99457e-08	1.21442e-06	8.09282
PANK1	-0.778526	7.85868	-5.8592	5.00417e-08	1.21545e-06	8.09097
NFKBIZ	1.14543	9.29568	5.84696	5.29261e-08	1.2814e-06	8.03693
DUSP7	0.765503	9.60074	5.84661	5.30106e-08	1.28155e-06	8.03539
SAMD13	-1.19478	6.44791	-5.84647	5.30452e-08	1.28155e-06	8.03476
SLC7A5	1.50046	8.29733	5.84534	5.33193e-08	1.2868e-06	8.02979
MARVELD3	-0.879375	8.23153	-5.84368	5.37258e-08	1.29427e-06	8.02247
ANK3	-0.888478	7.22955	-5.84333	5.38123e-08	1.29457e-06	8.02092
IGHV4-59	2.08689	12.0508	5.83887	5.49208e-08	1.31984e-06	8.00126
LPHN2	1.64354	7.96955	5.8361	5.56205e-08	1.33364e-06	7.98905
KIAA0195	-0.615577	8.6952	-5.83589	5.56736e-08	1.33364e-06	7.98813
ZNF577	-0.644658	6.44946	-5.83556	5.57573e-08	1.33364e-06	7.98668
KIRREL	0.987975	7.45031	5.83079	5.6986e-08	1.36082e-06	7.96566
SDR16C5	1.21692	6.63575	5.82975	5.72556e-08	1.3644e-06	7.96111
RNF122	0.795992	7.15706	5.82868	5.75371e-08	1.36967e-06	7.95639
LRRN2	-0.898238	6.78967	-5.82771	5.77918e-08	1.37429e-06	7.95213
TMEM204	0.835573	8.31177	5.82454	5.86353e-08	1.39006e-06	7.93816
C9orf85	-0.602995	7.11439	-5.82453	5.86385e-08	1.39006e-06	7.9381
PAPLN	0.648545	7.30332	5.82108	5.95681e-08	1.40623e-06	7.92294
AGMAT	-0.788944	8.43313	-5.81686	6.07254e-08	1.43206e-06	7.90439
GRAMD4	-0.746419	8.62984	-5.8155	6.11046e-08	1.43724e-06	7.89839
PGM3	0.762796	8.23431	5.81095	6.23866e-08	1.46161e-06	7.87837
TMEM165	0.654398	10.0998	5.81059	6.24898e-08	1.46161e-06	7.87678
LIMS1	0.621871	8.98296	5.81057	6.24935e-08	1.46161e-06	7.87672
PGAP3	-0.827194	8.08787	-5.80775	6.33023e-08	1.47597e-06	7.86433
EYA2	-0.775865	6.8383	-5.80743	6.33955e-08	1.47663e-06	7.86291
MTM1	-0.959956	7.77599	-5.80356	6.45236e-08	1.49983e-06	7.8459
SLC38A5	0.861908	7.52856	5.80213	6.4945e-08	1.50808e-06	7.83963
SOCS1	0.960138	8.06602	5.79837	6.60683e-08	1.53103e-06	7.8231
MTMR11	-1.19503	8.78485	-5.79749	6.63315e-08	1.534e-06	7.81927
AHR	0.780959	9.95213	5.79663	6.65924e-08	1.5369e-06	7.81548
FSTL1	1.63131	9.32209	5.79578	6.68512e-08	1.54131e-06	7.81174
MT1E	-0.926836	9.6097	-5.79295	6.77172e-08	1.55811e-06	7.79934
LEF1	1.17277	7.06353	5.79233	6.7911e-08	1.56099e-06	7.79658
IGKV3D-11	2.45892	11.089	5.79066	6.84293e-08	1.56656e-06	7.78925
MT1X	-1.15266	9.22306	-5.78939	6.88254e-08	1.57404e-06	7.78369
PDP1	0.863847	9.70758	5.76818	7.57955e-08	1.72132e-06	7.69072
HAVCR1	-1.7227	6.07743	-5.76637	7.64199e-08	1.73376e-06	7.68281
RNA5SP356	-0.711595	6.76332	-5.7661	7.6516e-08	1.73421e-06	7.6816
C5orf63	-0.795729	7.22972	-5.76394	7.72713e-08	1.74784e-06	7.67214
CHN2	-1.01905	8.10194	-5.76302	7.75934e-08	1.75338e-06	7.66813
ATP1B3	-0.791217	9.6236	-5.75334	8.10793e-08	1.82851e-06	7.62578
MSN	1.49298	9.77576	5.75062	8.20854e-08	1.84753e-06	7.6139
ZNF91	-1.05212	8.99373	-5.74983	8.23818e-08	1.85054e-06	7.61042
SH3PXD2B	0.931632	8.00016	5.74952	8.24981e-08	1.85132e-06	7.60906
FAM57A	0.72328	8.82967	5.74636	8.36879e-08	1.87246e-06	7.59527
CRAT	-0.745076	8.83443	-5.74611	8.37826e-08	1.87246e-06	7.59418
SDHB	-0.598251	9.55583	-5.74593	8.38528e-08	1.87246e-06	7.59337
ATP2B1	-0.606307	9.17007	-5.74175	8.5457e-08	1.9019e-06	7.57511
ST3GAL1	1.52607	8.08146	5.74162	8.55058e-08	1.9019e-06	7.57456
TAP2	0.835035	8.73052	5.73912	8.64818e-08	1.91985e-06	7.56362
GABRP	1.289	7.28931	5.73876	8.66238e-08	1.92112e-06	7.56204
DUOXA2	3.44451	9.80842	5.73838	8.67721e-08	1.92253e-06	7.5604
ZNF763	-0.65424	6.13158	-5.73746	8.71346e-08	1.9268e-06	7.55638
SUCLG2P2	-0.611895	6.77105	-5.73253	8.91022e-08	1.96267e-06	7.53487
KCNE3	0.856983	7.44966	5.7323	8.91943e-08	1.96279e-06	7.53387
HID1	0.580293	8.90239	5.73137	8.95714e-08	1.96918e-06	7.52981
NRIP1	-0.666382	9.39726	-5.72839	9.07886e-08	1.99209e-06	7.5168
SLCO4A1	1.13038	7.92644	5.72817	9.08812e-08	1.99219e-06	7.51582
PDE4B	1.19353	6.84204	5.72518	9.21213e-08	2.01549e-06	7.50276
RAB11FIP1	-0.751734	8.63096	-5.72441	9.24419e-08	2.02055e-06	7.49941
IL6R	-0.586484	8.43969	-5.72303	9.30206e-08	2.03125e-06	7.4934
RN7SL706P	-0.853516	5.11867	-5.72204	9.34403e-08	2.03845e-06	7.48907
USP2	-1.24996	7.78192	-5.71482	9.65428e-08	2.09607e-06	7.4576
GBA2	-0.607667	9.25193	-5.7123	9.76502e-08	2.11606e-06	7.44661
PRDM1	1.57148	9.37618	5.71048	9.84563e-08	2.12947e-06	7.43869
IER2	0.642717	8.40368	5.70635	1.0031e-07	2.15928e-06	7.42072
JAK2	0.852123	8.2762	5.70312	1.01786e-07	2.1869e-06	7.40666
DUOX2	3.53846	11.1393	5.70273	1.01965e-07	2.18868e-06	7.40497
GOLIM4	-0.609024	10.3947	-5.69717	1.0456e-07	2.24014e-06	7.38076
TMIGD1	-3.06534	7.52919	-5.69289	1.06598e-07	2.27737e-06	7.36216
GPRC5B	0.90712	7.93347	5.69118	1.07427e-07	2.29292e-06	7.3547
ADAMTS1	1.48418	7.39414	5.69069	1.07663e-07	2.29364e-06	7.35259
RHOB	0.689161	9.2371	5.68349	1.11219e-07	2.35615e-06	7.32129
ZADH2	-0.691231	8.26817	-5.68253	1.11704e-07	2.36201e-06	7.3171
LAMC1	1.32867	8.46646	5.68089	1.12533e-07	2.3729e-06	7.30999
FLJ38379	-0.968873	5.80498	-5.67972	1.13126e-07	2.3832e-06	7.30492
GARS	0.597098	9.78406	5.67667	1.14694e-07	2.4115e-06	7.29166
MAB21L3	-1.27344	7.05307	-5.67649	1.14788e-07	2.4115e-06	7.29088
TSPAN7	-1.32977	9.84319	-5.67494	1.15592e-07	2.4239e-06	7.28416
CRELD2	0.74687	8.03959	5.67346	1.16367e-07	2.43567e-06	7.27772
OCRL	-0.61832	8.2015	-5.67003	1.18178e-07	2.46903e-06	7.26284
STAT1	1.07754	10.5227	5.66962	1.18399e-07	2.46958e-06	7.26104
LDHB	0.717259	9.32238	5.66957	1.18422e-07	2.46958e-06	7.26086
LANCL3	-0.823896	5.99986	-5.66841	1.19043e-07	2.47938e-06	7.25583
NUAK2	-0.722363	7.97613	-5.6666	1.20022e-07	2.49607e-06	7.24794
PLK3	0.923947	7.6738	5.65682	1.25425e-07	2.59418e-06	7.20554
SERPING1	1.57674	8.97698	5.6565	1.25607e-07	2.59418e-06	7.20414
NIPAL1	-1.17726	8.67861	-5.65585	1.25973e-07	2.59842e-06	7.20134
SMPDL3A	-1.14725	9.43581	-5.65226	1.28027e-07	2.63122e-06	7.18577
PLXNA2	-0.799684	8.03335	-5.65177	1.28308e-07	2.63461e-06	7.18366
SELENBP1	-1.63465	10.755	-5.64982	1.29439e-07	2.65543e-06	7.17521
PTRF	0.927905	7.60324	5.64311	1.334e-07	2.71873e-06	7.14618
ADCY9	-0.584619	8.01738	-5.64298	1.33483e-07	2.71873e-06	7.14559
COQ5	-0.602561	7.94053	-5.6387	1.36076e-07	2.76732e-06	7.12706
SLC12A4	0.676051	7.5152	5.6363	1.37551e-07	2.79409e-06	7.11668
NR1I2	-0.890188	7.08192	-5.63465	1.38573e-07	2.80982e-06	7.10956
TUBA1A	0.846846	8.63686	5.63168	1.40434e-07	2.84247e-06	7.09672
IER3	1.04299	9.79211	5.6267	1.43612e-07	2.89905e-06	7.07517
ATP10D	0.62248	7.48597	5.62509	1.44653e-07	2.91488e-06	7.06822
NXPE2	-1.51374	7.22397	-5.62113	1.47247e-07	2.96451e-06	7.05112
PTPN21	-0.67858	7.56516	-5.61943	1.48371e-07	2.97777e-06	7.04379
SPARC	1.53931	10.7199	5.61935	1.48428e-07	2.97777e-06	7.04342
NAT2	-1.13579	6.6475	-5.61934	1.4843e-07	2.97777e-06	7.04341
GIMAP4	1.23897	6.91357	5.61755	1.49631e-07	2.99476e-06	7.03565
PCSK5	-1.17547	8.41011	-5.61749	1.49672e-07	2.99476e-06	7.03539
RETSAT	-0.95512	10.1433	-5.61722	1.49854e-07	2.99576e-06	7.03422
XPNPEP2	-1.38697	6.95322	-5.61515	1.51247e-07	3.02096e-06	7.02531
CA12	-0.907153	11.125	-5.61293	1.52765e-07	3.0459e-06	7.0157
LYN	1.19278	9.69523	5.61084	1.54202e-07	3.07187e-06	7.00669
HOXB5	-0.952223	7.19335	-5.61049	1.54443e-07	3.07398e-06	7.00518
GLTP	-0.611199	8.52384	-5.60839	1.55906e-07	3.09495e-06	6.99611
ACACB	-0.709746	7.30541	-5.60659	1.57164e-07	3.11719e-06	6.98838
ATP1B3P1	-0.615335	6.76943	-5.6049	1.58364e-07	3.13825e-06	6.98106
TSPAN18	0.846068	7.29811	5.60252	1.6006e-07	3.16911e-06	6.9708
BCL3	0.587814	9.87289	5.59986	1.61976e-07	3.20424e-06	6.95935
ADAL	-0.663878	6.52514	-5.59686	1.64164e-07	3.24471e-06	6.94643
MFNG	0.765157	7.22072	5.59496	1.65568e-07	3.26961e-06	6.93824
CHP2	-2.29299	7.97997	-5.59308	1.66972e-07	3.28875e-06	6.93012
MT1IP	-0.650267	6.9723	-5.59143	1.68208e-07	3.30737e-06	6.92301
MIR8071-1	1.8696	9.98898	5.5907	1.68755e-07	3.31525e-06	6.91989
PLOD1	0.699525	8.93701	5.59043	1.68957e-07	3.31635e-06	6.91874
RNFT1	-0.591544	8.78497	-5.58927	1.69837e-07	3.33075e-06	6.91374
CBFB	0.696769	9.24148	5.58907	1.69992e-07	3.33091e-06	6.91286
GIMAP1-GIMAP5	1.08253	7.90743	5.58795	1.70849e-07	3.34481e-06	6.90802
TMEM177	-0.583748	7.90688	-5.58524	1.72927e-07	3.38257e-06	6.89639
RNU6-1165P	-0.633235	4.2187	-5.57852	1.78205e-07	3.47385e-06	6.86746
ACER2	-0.764831	6.64498	-5.57734	1.79147e-07	3.48623e-06	6.86239
C1R	1.54072	9.14737	5.57691	1.79493e-07	3.48998e-06	6.86053
PLEKHG1	0.593175	7.49709	5.57437	1.81544e-07	3.52381e-06	6.8496
CYP4F2	-1.12188	6.6899	-5.57068	1.84556e-07	3.57313e-06	6.83376
IFT57	-0.601658	7.60722	-5.57015	1.84997e-07	3.57861e-06	6.83147
MYLIP	-0.723278	8.01759	-5.56722	1.87436e-07	3.61348e-06	6.81886
PIGZ	-1.62419	8.14998	-5.56032	1.93296e-07	3.70444e-06	6.78925
FKBP11	1.11099	8.09897	5.56004	1.93537e-07	3.70593e-06	6.78805
ZAK	0.822843	6.59267	5.55859	1.94795e-07	3.72687e-06	6.78181
IGKV1D-33	1.99985	10.7784	5.55611	1.96965e-07	3.75574e-06	6.77115
STEAP4	2.31769	7.26621	5.55573	1.97292e-07	3.75881e-06	6.76956
SNX4	-0.662894	7.90417	-5.55332	1.99425e-07	3.79327e-06	6.75922
DTX4	-0.69842	8.89778	-5.55294	1.99769e-07	3.79327e-06	6.75756
PDIA3	0.634773	11.1222	5.55115	2.0137e-07	3.81488e-06	6.74988
C4B	1.64381	8.05314	5.54457	2.07359e-07	3.91774e-06	6.72168
HOXA7	-0.87873	8.17967	-5.54202	2.09736e-07	3.95279e-06	6.71072
TMEM236	-2.17788	8.27245	-5.54142	2.10294e-07	3.96002e-06	6.70816
ADARB1	0.626637	7.12732	5.53468	2.16705e-07	4.06389e-06	6.67928
HAPLN3	1.11295	7.23896	5.53322	2.18118e-07	4.08052e-06	6.67303
ELOVL5	1.4422	8.79492	5.53284	2.18483e-07	4.08374e-06	6.67142
ACO2	-0.641539	10.195	-5.5319	2.19402e-07	4.09754e-06	6.66738
TM4SF18	1.32327	6.88851	5.53027	2.21e-07	4.12401e-06	6.6604
RNU1-59P	1.14144	6.91546	5.52818	2.23064e-07	4.1557e-06	6.65146
RAB8B	1.0068	8.15152	5.5279	2.23345e-07	4.15751e-06	6.65025
ZNF252P	-0.681227	6.72991	-5.52692	2.24321e-07	4.17226e-06	6.64605
SELP	2.036	7.11715	5.52664	2.246e-07	4.17402e-06	6.64486
IL33	1.45873	6.20289	5.52227	2.29004e-07	4.24893e-06	6.62618
HSP90B1	0.628413	12.2341	5.52146	2.29831e-07	4.26079e-06	6.62271
PHLDA2	0.591281	8.96922	5.51782	2.33584e-07	4.3233e-06	6.60714
SLC15A3	0.788888	7.5614	5.51274	2.38911e-07	4.41111e-06	6.58545
CEBPB	0.959422	8.81695	5.50708	2.44996e-07	4.51246e-06	6.56126
LDLR	0.773189	10.4343	5.50577	2.46433e-07	4.53525e-06	6.55564
EPB41L4B	-0.955904	8.00052	-5.50422	2.48133e-07	4.55959e-06	6.54903
SCD	1.20336	9.70101	5.5042	2.48157e-07	4.55959e-06	6.54893
ABHD3	-0.839573	9.54814	-5.50271	2.49796e-07	4.58599e-06	6.5426
ALDH5A1	-0.715246	6.57221	-5.50187	2.50732e-07	4.59945e-06	6.53901
ICAM2	1.08421	8.51958	5.50035	2.52435e-07	4.62322e-06	6.5325
CYP4F12	-1.19019	7.39929	-5.49384	2.59823e-07	4.73181e-06	6.50476
SLC6A6	1.34228	8.15646	5.49224	2.61675e-07	4.76173e-06	6.49793
TNFRSF10B	0.715697	8.46073	5.4882	2.66406e-07	4.83619e-06	6.4807
NGEF	-0.733786	7.45184	-5.48675	2.68126e-07	4.86354e-06	6.47451
NR4A2	1.7983	8.2327	5.48642	2.68519e-07	4.86678e-06	6.4731
MIR196A1	-1.02891	7.20584	-5.48594	2.69089e-07	4.87322e-06	6.47107
SDHD	-0.601611	9.61531	-5.48473	2.70535e-07	4.8955e-06	6.46591
COL1A1	1.63151	9.84749	5.48368	2.71801e-07	4.91059e-06	6.46142
PLXND1	0.869138	7.90651	5.48288	2.72761e-07	4.924e-06	6.45804
INSC	0.990275	6.91531	5.48028	2.75922e-07	4.97288e-06	6.44696
PMEPA1	0.718162	8.49235	5.47715	2.7978e-07	5.03073e-06	6.43361
PTPRM	1.09059	7.83634	5.47603	2.81166e-07	5.04765e-06	6.42886
QSOX1	0.732067	10.4241	5.47557	2.81741e-07	5.05398e-06	6.42689
CCDC167	0.59684	7.02818	5.47498	2.82475e-07	5.05723e-06	6.42439
SLC20A1	-0.946665	8.85223	-5.47489	2.8259e-07	5.05723e-06	6.424
CASP1	1.21804	8.94406	5.47316	2.84769e-07	5.09175e-06	6.41661
CD40	0.847324	6.55189	5.46692	2.92743e-07	5.21352e-06	6.39007
ENG	1.36253	9.26127	5.46677	2.9293e-07	5.21352e-06	6.38945
HPGDS	-1.2154	6.13565	-5.46589	2.94075e-07	5.2257e-06	6.3857
RNF5	-0.671939	7.84927	-5.46405	2.96477e-07	5.26426e-06	6.37788
TNC	2.46904	8.7951	5.46213	2.99009e-07	5.29679e-06	6.36971
ECH1	-0.694953	11.1706	-5.46042	3.01283e-07	5.33292e-06	6.36243
TNIP3	3.38225	8.25211	5.45923	3.02869e-07	5.35682e-06	6.35738
GPD1L	-1.05562	8.20979	-5.45589	3.07366e-07	5.42139e-06	6.34321
DDX26B	-0.636143	6.96959	-5.45564	3.07713e-07	5.42139e-06	6.34212
ITPKA	-0.623991	7.33191	-5.45484	3.08805e-07	5.4364e-06	6.33872
GPX8	1.12278	6.05316	5.45118	3.13833e-07	5.50784e-06	6.3232
CRIP2	0.885027	8.47462	5.44797	3.18315e-07	5.58124e-06	6.30957
EMB	1.1144	7.2257	5.44784	3.18507e-07	5.58124e-06	6.30899
DISP2	-0.644245	7.71556	-5.44295	3.25452e-07	5.6881e-06	6.28825
IL7R	1.999	8.29432	5.44176	3.27167e-07	5.70657e-06	6.2832
LY6E	0.941187	7.9651	5.44064	3.28794e-07	5.73055e-06	6.27844
IGFBP5	2.04216	9.25853	5.44026	3.29339e-07	5.73564e-06	6.27685
MRPL35	-0.77339	8.59095	-5.4332	3.39758e-07	5.8945e-06	6.24691
IGKV3D-20	2.21201	11.2588	5.43255	3.40733e-07	5.9024e-06	6.24416
SLC25A4	-0.613073	8.56344	-5.43066	3.43581e-07	5.93202e-06	6.23616
IYD	-0.838654	6.71375	-5.42736	3.48619e-07	5.99439e-06	6.22217
TNFRSF12A	0.84243	9.50525	5.42671	3.4962e-07	6.00141e-06	6.21942
ARV1	-0.71889	8.24407	-5.42642	3.50066e-07	6.00452e-06	6.21819
KLC4	-0.627273	7.75533	-5.4252	3.51954e-07	6.02486e-06	6.21302
ST3GAL4	0.986783	8.63845	5.42514	3.52047e-07	6.02486e-06	6.21277
TRERF1	0.679556	6.58161	5.42414	3.53608e-07	6.04701e-06	6.20852
AGFG2	-0.605426	7.41549	-5.42169	3.57442e-07	6.0911e-06	6.19815
FAM46C	1.01184	9.65981	5.41809	3.63161e-07	6.16669e-06	6.1829
PTGS2	2.72841	8.06488	5.41799	3.63322e-07	6.16669e-06	6.18248
RILPL2	0.805159	7.09663	5.41695	3.64981e-07	6.1764e-06	6.1781
FAM162A	-1.06702	8.0101	-5.4162	3.66185e-07	6.19156e-06	6.17493
AHCYL2	-1.07799	10.9385	-5.41469	3.68636e-07	6.22434e-06	6.16852
NAT1	-0.643664	6.39158	-5.41318	3.71099e-07	6.26126e-06	6.16212
TGFBR2	0.670967	9.87944	5.40517	3.84406e-07	6.44746e-06	6.12827
LRRC19	-1.86019	8.15807	-5.40351	3.87225e-07	6.48517e-06	6.12125
C6orf136	-0.757555	7.85284	-5.40106	3.91417e-07	6.54207e-06	6.11091
GBP4	1.8576	7.77415	5.40102	3.91479e-07	6.54207e-06	6.11076
KLHDC2	-0.59183	8.543	-5.39878	3.95362e-07	6.59458e-06	6.10127
TMED6	-0.941131	5.83477	-5.39726	3.98012e-07	6.63159e-06	6.09486
MXI1	-0.729638	8.29135	-5.39187	4.07551e-07	6.77312e-06	6.07211
MAML3	-0.78121	7.8108	-5.39002	4.10884e-07	6.81108e-06	6.06428
MPI	-0.603615	8.22508	-5.38823	4.14124e-07	6.85478e-06	6.05674
ABCA5	-0.829039	7.41008	-5.38553	4.1905e-07	6.93127e-06	6.04538
CSRNP1	0.744977	7.19727	5.3852	4.19661e-07	6.93632e-06	6.04398
PAPSS2	-0.743402	10.9761	-5.37946	4.30368e-07	7.0875e-06	6.01978
SLC7A11	1.89774	8.19416	5.37917	4.30923e-07	7.08916e-06	6.01854
RGCC	1.05423	8.23558	5.37907	4.31102e-07	7.08916e-06	6.01814
CDH11	1.31491	8.3683	5.37891	4.31406e-07	7.08916e-06	6.01746
PTGDR	-1.24682	7.74425	-5.37643	4.36133e-07	7.16166e-06	6.007
GNA11	-0.906393	10.181	-5.37613	4.36716e-07	7.16605e-06	6.00571
IDH2	0.582189	10.2929	5.37571	4.37517e-07	7.17402e-06	6.00395
TRAK2	-0.638035	8.84193	-5.37111	4.46429e-07	7.3096e-06	5.98458
GABRA2	-1.01622	5.71066	-5.36831	4.51938e-07	7.38393e-06	5.9728
CYYR1	1.34484	7.53738	5.36831	4.51945e-07	7.38393e-06	5.97279
ARID5A	0.644005	7.26611	5.36598	4.56583e-07	7.449e-06	5.96298
ABCC13	-0.778635	5.56183	-5.36581	4.56928e-07	7.44927e-06	5.96226
NCS1	0.671162	7.07568	5.36489	4.58766e-07	7.46851e-06	5.9584
PPP1R14C	-0.605281	7.27409	-5.36434	4.59882e-07	7.4791e-06	5.95607
RNF213	1.03387	9.59066	5.36285	4.62876e-07	7.51388e-06	5.94984
TESC	0.750687	7.84649	5.36206	4.64497e-07	7.53481e-06	5.94648
F2R	1.17511	7.63711	5.36138	4.65864e-07	7.55159e-06	5.94366
PDHA1	-0.755991	9.23309	-5.36069	4.67284e-07	7.5692e-06	5.94074
NEK3	-0.726803	7.7146	-5.36048	4.67709e-07	7.57069e-06	5.93986
RAPGEFL1	-1.28289	9.01191	-5.35834	4.72118e-07	7.63117e-06	5.93085
ICAM1	1.79457	8.74379	5.35783	4.73164e-07	7.64265e-06	5.92873
ZNF844	-0.697747	5.8878	-5.35683	4.75246e-07	7.66707e-06	5.92451
SERPINA3	2.22232	8.01834	5.35678	4.75352e-07	7.66707e-06	5.9243
COL6A3	1.90898	9.05752	5.35403	4.81107e-07	7.7489e-06	5.91274
ACKR1	0.873642	7.00559	5.3537	4.81807e-07	7.75467e-06	5.91134
IL1R1	1.45732	8.41907	5.353	4.83275e-07	7.77278e-06	5.90842
ADCY6	-0.686961	8.72976	-5.34738	4.95306e-07	7.96065e-06	5.88481
PGM1	-0.656596	8.82836	-5.34255	5.05885e-07	8.11919e-06	5.86452
TEK	1.08998	7.00102	5.34195	5.07211e-07	8.13472e-06	5.862
HLA-DPB1	1.26003	10.7017	5.34144	5.08345e-07	8.14278e-06	5.85986
BAG2	0.818068	7.14525	5.3403	5.10897e-07	8.17075e-06	5.85505
NAPEPLD	-0.963697	8.22891	-5.33975	5.12123e-07	8.1846e-06	5.85275
FBXO16	0.919373	6.38147	5.33895	5.13921e-07	8.20756e-06	5.84938
TTC9	0.618261	7.93527	5.33875	5.14354e-07	8.20869e-06	5.84858
AREG	1.5435	8.94805	5.33241	5.28802e-07	8.40973e-06	5.82198
LBH	0.808992	7.22296	5.33171	5.30438e-07	8.42984e-06	5.81901
PPP1R3B	-0.585624	7.43559	-5.33031	5.33689e-07	8.46366e-06	5.81315
PCOLCE	1.35253	8.93118	5.32772	5.39751e-07	8.54199e-06	5.8023
ASPA	-0.653015	4.5299	-5.32593	5.43992e-07	8.59014e-06	5.79479
EDN1	-0.998663	7.95293	-5.32485	5.46557e-07	8.60248e-06	5.79027
CASP4	1.02937	8.15987	5.32483	5.46604e-07	8.60248e-06	5.79019
DNAJC10	0.789436	9.24202	5.32409	5.48379e-07	8.62365e-06	5.78708
NRN1	0.792166	6.93924	5.32379	5.49082e-07	8.62365e-06	5.78585
AKAP2	0.885175	7.1943	5.32351	5.49769e-07	8.62837e-06	5.78465
ENPP2	1.32102	8.78361	5.32273	5.51626e-07	8.65153e-06	5.78141
ZNF57	-0.840707	7.9703	-5.31835	5.62273e-07	8.80029e-06	5.76306
TSTA3	0.81876	9.95411	5.3122	5.77556e-07	9.02705e-06	5.73731
MEP1AP4	-1.27183	6.93275	-5.31199	5.78089e-07	9.02916e-06	5.73643
SUCLG2	-0.871441	9.4493	-5.30925	5.85025e-07	9.12007e-06	5.72498
GPR125	-0.914837	8.10464	-5.3053	5.95179e-07	9.23891e-06	5.70846
TRANK1	-0.721813	8.67271	-5.30501	5.95935e-07	9.24432e-06	5.70724
UNC13D	0.934564	8.30028	5.30343	6.00051e-07	9.28913e-06	5.70064
COL1A2	1.60755	9.51083	5.29994	6.09249e-07	9.39949e-06	5.68604
PRAF2	0.692534	7.49463	5.29961	6.10127e-07	9.40664e-06	5.68466
ENTPD1	1.50947	8.49088	5.29823	6.1379e-07	9.4567e-06	5.67891
SLFN11	1.50333	7.54485	5.29674	6.17793e-07	9.50547e-06	5.67267
CWH43	-2.42224	7.06935	-5.29626	6.19071e-07	9.51513e-06	5.67069
RIPK2	1.04042	7.76937	5.29619	6.19259e-07	9.51513e-06	5.6704
UGT2B10	-0.885803	5.66233	-5.29013	6.35809e-07	9.74964e-06	5.64508
GJA1	1.6247	7.60623	5.28881	6.39477e-07	9.78607e-06	5.63956
SBNO2	0.707398	8.68146	5.2874	6.43405e-07	9.83955e-06	5.63369
HLA-DQB1	1.40913	8.35864	5.28623	6.467e-07	9.88145e-06	5.62878
AAED1	1.01067	7.49754	5.28584	6.47777e-07	9.88145e-06	5.62719
TCF4	1.38663	8.78109	5.2848	6.5071e-07	9.91122e-06	5.62285
FILIP1L	0.794405	6.83296	5.28049	6.63022e-07	1.00785e-05	5.60487
CCDC109B	1.01187	7.30545	5.27958	6.65641e-07	1.0106e-05	5.60108
GPR39	-0.926051	8.25899	-5.27826	6.69471e-07	1.01561e-05	5.59558
GPR183	1.37525	6.85337	5.27542	6.77792e-07	1.02686e-05	5.58372
STAT2	0.745075	8.55769	5.27511	6.787e-07	1.02755e-05	5.58244
INPP5D	1.08335	8.55248	5.27464	6.80092e-07	1.02897e-05	5.58047
C5orf52	-0.704294	5.81886	-5.27326	6.8418e-07	1.03447e-05	5.57472
OTUB2	0.700784	7.02199	5.27177	6.88614e-07	1.03979e-05	5.56852
PHC3	-0.585038	7.62884	-5.26725	7.0226e-07	1.05828e-05	5.5497
SMIM14	-0.806915	9.5418	-5.26696	7.03142e-07	1.05891e-05	5.54849
GEM	1.12663	7.28295	5.2665	7.04551e-07	1.06033e-05	5.54657
CH25H	0.956493	6.93338	5.26475	7.09928e-07	1.06701e-05	5.53928
IGKV3OR2-268	2.00477	9.60442	5.26431	7.11266e-07	1.06831e-05	5.53747
RN7SL688P	-0.62825	6.26265	-5.25859	7.29129e-07	1.09225e-05	5.51367
GRTP1	-0.581232	8.275	-5.2562	7.36734e-07	1.10219e-05	5.50372
THBD	0.839685	7.58918	5.25565	7.38501e-07	1.10354e-05	5.50142
OLFM1	0.712748	7.16195	5.25348	7.45453e-07	1.1123e-05	5.49243
ROBO1	1.34535	7.91947	5.25227	7.49386e-07	1.1167e-05	5.48738
ARHGAP44	-1.25383	7.83809	-5.25148	7.51959e-07	1.11907e-05	5.48409
IGSF3	-0.826139	7.74967	-5.25027	7.55903e-07	1.12347e-05	5.47908
RFK	-0.581879	9.48534	-5.24765	7.64545e-07	1.1344e-05	5.46817
DOC2B	1.0873	7.69764	5.24676	7.67494e-07	1.13771e-05	5.46448
TMEM9B	-0.649565	9.52547	-5.24622	7.69293e-07	1.13964e-05	5.46223
JAM2	1.01282	7.81815	5.24532	7.72296e-07	1.1426e-05	5.4585
ZNF532	0.859767	7.34851	5.2442	7.76056e-07	1.14741e-05	5.45384
LRRC31	-1.42867	6.91187	-5.24296	7.80216e-07	1.15206e-05	5.44871
LZIC	-0.6143	7.869	-5.23762	7.98468e-07	1.17519e-05	5.42653
LPGAT1	0.86297	8.77773	5.23501	8.07533e-07	1.18699e-05	5.4157
RCN1	0.646147	9.59861	5.23316	8.14009e-07	1.1942e-05	5.40804
APOL3	0.748929	6.69472	5.23144	8.20072e-07	1.2002e-05	5.40092
MCAM	1.32007	8.11094	5.23017	8.24593e-07	1.20428e-05	5.39565
MB21D1	1.06716	6.9069	5.22971	8.26234e-07	1.2059e-05	5.39374
ST3GAL5	0.66291	7.13787	5.22741	8.34499e-07	1.21331e-05	5.38419
CCDC69	1.14277	7.58017	5.2273	8.34894e-07	1.21331e-05	5.38374
LDB2	0.912628	7.39295	5.22725	8.35076e-07	1.21331e-05	5.38353
RNF103	-0.636719	8.81578	-5.22713	8.35509e-07	1.21331e-05	5.38304
NDUFA5	-0.624582	7.19213	-5.22407	8.46646e-07	1.22779e-05	5.37034
SLC25A23	-0.936702	8.27141	-5.2223	8.53133e-07	1.23405e-05	5.36302
MMP3	3.77188	8.53742	5.21838	8.67693e-07	1.25432e-05	5.34679
RASSF5	1.03795	7.97504	5.2163	8.75514e-07	1.26482e-05	5.33818
LMAN1	0.74008	10.3208	5.21253	8.89875e-07	1.28475e-05	5.32258
MTMR8	-0.772143	6.49371	-5.21167	8.93202e-07	1.28755e-05	5.319
CCL24	1.25502	8.35207	5.21055	8.97505e-07	1.2919e-05	5.31439
NUCB2	0.906569	8.9999	5.21051	8.97675e-07	1.2919e-05	5.31421
LOC101059935	-1.12097	5.61118	-5.20989	9.00082e-07	1.29454e-05	5.31164
MT1L	-0.818826	9.19864	-5.20974	9.00651e-07	1.29454e-05	5.31104
PLEKHG2	0.806161	7.85715	5.20642	9.13658e-07	1.31075e-05	5.29729
PRR15	-1.15178	9.61539	-5.20249	9.29277e-07	1.33203e-05	5.28104
RHBDF2	0.609766	7.03221	5.20021	9.38429e-07	1.34289e-05	5.27164
MT1P1	-0.911827	12.0498	-5.19721	9.50654e-07	1.35953e-05	5.25923
IGHV3-74	1.58906	12.1949	5.19515	9.59114e-07	1.36904e-05	5.25073
VCAM1	1.54043	7.53952	5.19148	9.74401e-07	1.38912e-05	5.23557
FMO5	-1.58678	8.16936	-5.19087	9.76951e-07	1.39188e-05	5.23307
AKAP1	-0.913874	9.24124	-5.19009	9.80252e-07	1.39571e-05	5.22984
PTPN14	0.644277	7.33633	5.18938	9.83243e-07	1.39909e-05	5.22691
CMTM7	0.713485	7.95521	5.1887	9.86113e-07	1.40054e-05	5.22412
ITGB3	1.0031	7.30958	5.18347	1.00857e-06	1.42797e-05	5.20253
ARL4C	0.682419	7.41265	5.18062	1.02103e-06	1.44445e-05	5.19076
ZNF681	-0.771475	5.38817	-5.18051	1.02148e-06	1.44445e-05	5.19034
PCK1	-2.90188	8.1239	-5.17638	1.03982e-06	1.46764e-05	5.17328
CD93	1.43259	8.26198	5.17548	1.04381e-06	1.47236e-05	5.16961
TWSG1	0.703989	8.25226	5.17456	1.04798e-06	1.4764e-05	5.16579
CYB5R2	0.646066	7.16021	5.17384	1.05119e-06	1.48001e-05	5.16286
NDUFA2	-0.631999	8.71459	-5.17099	1.06416e-06	1.49518e-05	5.15111
NUDT16P1	-0.685664	8.20708	-5.1709	1.0646e-06	1.49518e-05	5.15071
CLDN23	-0.644481	8.45518	-5.16896	1.07349e-06	1.50394e-05	5.14274
MMP7	2.93509	7.41195	5.16543	1.08989e-06	1.52237e-05	5.1282
PLCD3	-0.90319	9.54074	-5.16543	1.0899e-06	1.52237e-05	5.1282
SLC35D2	-0.748886	9.51321	-5.1649	1.09237e-06	1.52459e-05	5.12603
AGPAT4	0.992659	6.94452	5.1645	1.09427e-06	1.52459e-05	5.12436
HOMER1	0.63847	5.53008	5.1642	1.09567e-06	1.52561e-05	5.12313
ERG	0.941484	6.68966	5.16188	1.10662e-06	1.53897e-05	5.1136
HYOU1	0.6183	9.83324	5.16167	1.1076e-06	1.53939e-05	5.11276
MICALCL	-0.748994	6.74093	-5.15936	1.11865e-06	1.55375e-05	5.10324
CREBRF	-0.598848	7.66871	-5.15684	1.13083e-06	1.56728e-05	5.09286
CYCS	-0.647596	9.00027	-5.15595	1.13513e-06	1.57092e-05	5.08922
CHST11	1.17061	8.76709	5.15572	1.13624e-06	1.5715e-05	5.08829
BTG2	1.00674	9.36864	5.15417	1.14386e-06	1.58108e-05	5.08188
IGHV3-35	1.23871	10.3185	5.15354	1.14696e-06	1.58439e-05	5.07929
PLIN2	-0.687322	7.96535	-5.15137	1.15764e-06	1.59721e-05	5.07041
PIM2	2.01765	9.19753	5.14921	1.16844e-06	1.61112e-05	5.06151
PRDX4	0.630165	7.4983	5.14197	1.20522e-06	1.65481e-05	5.03181
OSBPL8	0.735025	8.29705	5.14121	1.20919e-06	1.65725e-05	5.02866
RNF128	-0.903855	8.00507	-5.13948	1.21816e-06	1.66653e-05	5.02158
NID1	1.3868	8.01278	5.13849	1.22332e-06	1.67259e-05	5.01753
SNORD60	1.05881	6.8675	5.13687	1.23186e-06	1.68122e-05	5.01086
SMOX	0.980566	7.52881	5.1325	1.25509e-06	1.71061e-05	4.99296
MAP3K13	-0.770196	7.63034	-5.1312	1.26211e-06	1.71632e-05	4.98762
VDR	-0.737616	9.32436	-5.13088	1.26384e-06	1.71764e-05	4.98631
VSIG1	2.98789	7.46558	5.12812	1.27883e-06	1.73387e-05	4.97501
COL4A1	1.49136	8.24969	5.12261	1.30931e-06	1.77257e-05	4.95245
HIGD1A	-0.845615	9.56869	-5.12084	1.31927e-06	1.78125e-05	4.94518
CXorf36	0.850704	5.99882	5.12044	1.32155e-06	1.78221e-05	4.94353
IGHV3OR16-7	1.65813	11.45	5.12025	1.32262e-06	1.78259e-05	4.94276
VIM	1.16944	10.0992	5.1199	1.32457e-06	1.78416e-05	4.94135
AKIRIN2	0.60845	9.10583	5.11947	1.327e-06	1.78637e-05	4.93959
TGFBI	1.40844	9.62234	5.11903	1.32955e-06	1.78874e-05	4.93775
CLDN1	1.79306	7.81909	5.11431	1.35658e-06	1.81618e-05	4.91847
ELTD1	1.90296	7.28646	5.11263	1.36637e-06	1.82718e-05	4.91158
RNU6-570P	-1.17771	5.46683	-5.11168	1.37189e-06	1.83269e-05	4.90772
A1CF	-1.31312	8.58364	-5.11015	1.3809e-06	1.84255e-05	4.90145
GPR160	-1.08583	8.27923	-5.10677	1.40095e-06	1.86056e-05	4.88764
IGKV1OR2-3	2.3361	10.8659	5.10658	1.40214e-06	1.86105e-05	4.88683
ADAM19	1.17794	8.19829	5.10259	1.42618e-06	1.89185e-05	4.87055
SPR	-0.62971	8.68138	-5.10006	1.44163e-06	1.90901e-05	4.86023
ARHGDIB	1.28173	9.1451	5.09959	1.44453e-06	1.91173e-05	4.8583
EPHX2	-1.35191	7.32188	-5.0987	1.45003e-06	1.9179e-05	4.85466
IL6ST	0.709128	9.9577	5.09672	1.46235e-06	1.93194e-05	4.84656
ANXA1	1.84642	10.9214	5.09589	1.46749e-06	1.9376e-05	4.8432
PLXNA1	0.625815	8.3129	5.09082	1.49954e-06	1.97762e-05	4.82251
FEZ1	0.708426	5.96141	5.08811	1.51694e-06	1.99941e-05	4.81146
TMEM72	-0.95771	7.71178	-5.0875	1.52091e-06	2.00253e-05	4.80896
COL15A1	1.40476	8.15399	5.08734	1.52196e-06	2.00253e-05	4.8083
EHHADH	-0.862011	7.26109	-5.08715	1.52319e-06	2.00299e-05	4.80752
WASL	-0.630331	10.0878	-5.0861	1.52998e-06	2.01076e-05	4.80326
CLU	1.36855	8.03742	5.08512	1.53639e-06	2.01685e-05	4.79926
CYR61	1.64251	7.46917	5.08105	1.56327e-06	2.04924e-05	4.78265
BGN	1.7869	9.24152	5.07867	1.57919e-06	2.06824e-05	4.77295
GUCA2A	-2.66576	9.82666	-5.07716	1.58933e-06	2.07913e-05	4.76682
CXCR4	1.37573	7.44572	5.07697	1.59059e-06	2.07958e-05	4.76606
PPARD	-0.66811	8.77684	-5.07683	1.59159e-06	2.0797e-05	4.76546
CD2AP	-0.634866	10.4961	-5.07661	1.59307e-06	2.08042e-05	4.76457
JAK3	1.08172	7.36515	5.07547	1.60082e-06	2.08695e-05	4.75993
GRK5	0.709169	7.27379	5.07407	1.61034e-06	2.09695e-05	4.75425
PLEKHG6	-1.02878	7.81683	-5.0737	1.61292e-06	2.09911e-05	4.75272
LAMB2	0.699305	8.38236	5.07129	1.6295e-06	2.11583e-05	4.74292
KCNK5	-0.87092	7.78761	-5.06881	1.64676e-06	2.13581e-05	4.73283
SLC2A3	1.73158	8.07956	5.06503	1.67342e-06	2.16667e-05	4.71746
PANX1	0.781578	8.14892	5.06503	1.67342e-06	2.16667e-05	4.71746
RHOJ	1.29215	7.87368	5.06382	1.68207e-06	2.17618e-05	4.71253
ARHGAP29	1.26962	6.02972	5.06373	1.68268e-06	2.17618e-05	4.71218
PLAU	1.79112	8.57574	5.06275	1.6897e-06	2.18276e-05	4.70819
PRPS1	0.851572	7.62589	5.06224	1.69338e-06	2.18629e-05	4.70611
ZBP1	1.17121	7.93336	5.05823	1.72244e-06	2.21875e-05	4.68982
IGHV3-73	1.73745	11.708	5.05802	1.72398e-06	2.21893e-05	4.68896
BEST4	-1.8305	8.09963	-5.05503	1.746e-06	2.24343e-05	4.67681
TCN1	2.78935	7.59516	5.05362	1.7565e-06	2.25241e-05	4.67108
DEGS1	0.689126	7.67821	5.05345	1.75778e-06	2.25278e-05	4.67038
PFKFB2	-0.848077	8.13975	-5.04887	1.7922e-06	2.28555e-05	4.65182
C4BPB	1.67457	6.67973	5.04863	1.79404e-06	2.28555e-05	4.65083
SEMA6D	-0.751726	8.22893	-5.04852	1.79486e-06	2.28555e-05	4.65039
S100A8	3.26043	7.92711	5.0464	1.81109e-06	2.30039e-05	4.64178
NQO2	0.743831	8.13447	5.04609	1.81345e-06	2.30203e-05	4.64054
TMEM106A	0.674614	8.04409	5.04557	1.81751e-06	2.3059e-05	4.63839
DPYD	0.79428	8.02816	5.04459	1.82506e-06	2.31031e-05	4.63443
TGFB1	1.00666	7.76848	5.04215	1.84398e-06	2.33167e-05	4.62456
CRISPLD2	1.135	7.52577	5.03696	1.88497e-06	2.37425e-05	4.60351
F2RL2	1.36734	6.8001	5.0368	1.88628e-06	2.37458e-05	4.60285
ADRBK2	0.853631	6.72929	5.03661	1.88784e-06	2.37522e-05	4.60206
AIFM3	-0.908324	7.63727	-5.03563	1.89565e-06	2.38373e-05	4.59811
WIPF1	1.18194	9.10409	5.03468	1.90331e-06	2.39204e-05	4.59425
OLFM4	1.92571	12.5632	5.03381	1.91027e-06	2.39946e-05	4.59075
SPARCL1	1.57092	8.95356	5.0319	1.92579e-06	2.41628e-05	4.58301
XKR9	0.854149	5.22751	5.02997	1.94164e-06	2.4308e-05	4.57516
DAO	-0.670197	5.31272	-5.02908	1.94897e-06	2.43686e-05	4.57156
SLC9A2	-1.53497	9.05365	-5.02899	1.9497e-06	2.43686e-05	4.5712
REL	0.580955	8.89687	5.02732	1.96352e-06	2.45271e-05	4.56444
SNORA7B	0.926691	9.61322	5.02701	1.96611e-06	2.45271e-05	4.56318
SNORD50A	0.939357	8.22998	5.02694	1.9667e-06	2.45271e-05	4.56289
SYT11	0.999578	6.68655	5.02036	2.02218e-06	2.51637e-05	4.53627
OVOL2	-0.596156	7.34851	-5.02001	2.02513e-06	2.51866e-05	4.53488
ALDH6A1	-0.60421	7.11663	-5.01726	2.04878e-06	2.54389e-05	4.52377
COX5B	-0.592786	10.4301	-5.01538	2.06518e-06	2.55801e-05	4.51614
NBEAL1	-0.724352	8.30447	-5.01276	2.08813e-06	2.58287e-05	4.50557
RGS5	1.83636	8.52522	5.01205	2.09438e-06	2.58778e-05	4.5027
STRBP	-0.614758	7.8395	-5.01107	2.10312e-06	2.59717e-05	4.49872
PIP5K1B	-0.854674	8.39312	-5.01066	2.10674e-06	2.60022e-05	4.49708
LYPD6B	0.794695	7.35873	5.01051	2.10808e-06	2.60046e-05	4.49647
ADH1A	-1.23289	7.14511	-5.00764	2.13378e-06	2.63074e-05	4.48487
TMTC1	1.14892	6.76503	5.00699	2.13961e-06	2.63649e-05	4.48227
ANPEP	-1.95956	10.1642	-5.00635	2.14539e-06	2.64219e-05	4.47968
ETS1	0.948333	8.81475	5.00588	2.1497e-06	2.64319e-05	4.47776
MT2P1	-0.738235	11.7292	-5.00466	2.16079e-06	2.65538e-05	4.47284
SEMA6A	-1.218	8.88729	-5.00311	2.17496e-06	2.66847e-05	4.46659
NDUFB5	-0.596525	9.28798	-4.99951	2.2082e-06	2.7034e-05	4.45208
PXDC1	0.87288	7.39759	4.99848	2.21786e-06	2.71377e-05	4.4479
CALCRL	1.67697	7.20214	4.99774	2.22476e-06	2.71929e-05	4.44493
GIMAP6	0.660106	7.09048	4.99761	2.22596e-06	2.71929e-05	4.44441
ABCC1	0.725734	8.74673	4.99567	2.24428e-06	2.73725e-05	4.43657
IQSEC1	0.679639	8.11599	4.99216	2.27775e-06	2.7736e-05	4.42241
ZFP36	0.868217	9.92784	4.98891	2.30914e-06	2.80411e-05	4.40932
FLT1	1.28109	7.246	4.98867	2.31145e-06	2.80411e-05	4.40837
STRIP2	1.40284	6.67934	4.98602	2.3374e-06	2.83227e-05	4.39768
PRO2012	-0.87794	7.06638	-4.98514	2.34605e-06	2.84002e-05	4.39415
DPY19L1	0.724927	8.2858	4.98283	2.36896e-06	2.86551e-05	4.38486
MMP12	2.52867	9.03141	4.98277	2.36963e-06	2.86551e-05	4.38459
PRKCDBP	0.96146	8.09327	4.97697	2.42811e-06	2.92688e-05	4.36127
CAV1	1.37132	8.55219	4.97421	2.45646e-06	2.95322e-05	4.35017
EGR2	0.638217	7.34677	4.97223	2.47704e-06	2.9748e-05	4.34219
PLCE1	-1.19215	9.19692	-4.97142	2.48549e-06	2.98338e-05	4.33893
CXCL11	2.21147	7.0313	4.97127	2.48708e-06	2.98371e-05	4.33832
IGHV3-7	1.18017	13.1955	4.97025	2.49776e-06	2.99475e-05	4.33423
IKBIP	0.890275	6.35594	4.97014	2.49892e-06	2.99475e-05	4.33378
MID2	0.637453	7.00467	4.96958	2.50474e-06	2.99856e-05	4.33156
MEST	-0.601786	8.26749	-4.96716	2.53033e-06	3.026e-05	4.32184
IGHV3-52	1.32143	13.266	4.96652	2.53716e-06	3.03257e-05	4.31926
BNIP3	1.25804	7.93212	4.9645	2.55883e-06	3.05526e-05	4.31113
ACOX2	-0.64692	7.05336	-4.96363	2.56816e-06	3.06479e-05	4.30765
FADS1	1.34361	7.51891	4.96338	2.57083e-06	3.06637e-05	4.30665
IGKV1D-16	1.3059	10.7284	4.96272	2.57803e-06	3.07198e-05	4.30398
CFI	1.78	6.69826	4.9627	2.57825e-06	3.07198e-05	4.3039
ID2	-0.612068	9.84169	-4.96229	2.58263e-06	3.07426e-05	4.30228
LOC642131	1.94496	9.77718	4.96221	2.58357e-06	3.07426e-05	4.30193
ZNF664-FAM101A	-0.800532	8.29423	-4.9597	2.6109e-06	3.10113e-05	4.29186
HSPG2	0.746126	9.1834	4.95941	2.61406e-06	3.10326e-05	4.29071
XK	-0.92965	8.48051	-4.95916	2.61686e-06	3.10495e-05	4.28969
BPNT1	-0.686555	8.0398	-4.95772	2.63274e-06	3.11934e-05	4.2839
RASGRF2	0.843048	6.91218	4.95478	2.66538e-06	3.15594e-05	4.27212
SPOCK2	0.751057	8.01477	4.95442	2.6694e-06	3.1574e-05	4.27068
CHI3L1	2.96672	8.78979	4.95367	2.67778e-06	3.16067e-05	4.26768
SUCLG1	-0.668699	9.27707	-4.95355	2.67912e-06	3.16067e-05	4.2672
CYP27A1	-0.887009	7.42896	-4.95272	2.68854e-06	3.17013e-05	4.26385
LOXL2	1.39137	8.36784	4.95113	2.70651e-06	3.18966e-05	4.25748
HIVEP2	0.784975	7.92742	4.95054	2.71326e-06	3.19265e-05	4.2551
SMARCA1	0.735704	6.55663	4.94825	2.73944e-06	3.21981e-05	4.24592
ATP8B2	0.816304	7.47001	4.94646	2.76006e-06	3.23264e-05	4.23875
HEBP1	-0.621231	8.19196	-4.9439	2.78977e-06	3.26239e-05	4.22851
PLA2G2A	1.29657	11.2617	4.94348	2.79467e-06	3.26501e-05	4.22684
SLC22A18AS	-0.872362	6.84093	-4.93977	2.83848e-06	3.31424e-05	4.21196
CLCN2	-1.04234	8.60469	-4.93894	2.84833e-06	3.32211e-05	4.20865
NFKB2	0.726704	8.15334	4.93879	2.8502e-06	3.32211e-05	4.20803
ZNF204P	-0.96239	5.32332	-4.93871	2.85108e-06	3.32211e-05	4.20773
MEP1A	-1.91057	10.081	-4.93674	2.87475e-06	3.34798e-05	4.19983
TSHZ2	0.910017	6.25924	4.93594	2.88437e-06	3.35402e-05	4.19664
HECTD3	-0.608789	9.77782	-4.9348	2.89818e-06	3.36835e-05	4.19207
MUC1	1.08739	11.2775	4.93377	2.91072e-06	3.37947e-05	4.18794
TTPA	-0.858128	6.39847	-4.93271	2.92367e-06	3.38931e-05	4.1837
LRPPRC	-0.602245	9.32462	-4.93186	2.93405e-06	3.39787e-05	4.18031
MUT	-0.658263	8.87666	-4.92352	3.03819e-06	3.50418e-05	4.14697
OSBPL3	0.844549	7.59385	4.92269	3.04874e-06	3.51386e-05	4.14366
C1S	1.56527	9.34838	4.92019	3.08087e-06	3.5444e-05	4.13364
PTAFR	0.843974	7.46361	4.91811	3.10772e-06	3.57167e-05	4.12535
MMP1	3.24966	8.90396	4.91768	3.11329e-06	3.57575e-05	4.12364
ASAP1	1.05817	8.45906	4.91576	3.13836e-06	3.5996e-05	4.11598
SRGAP2C	0.83217	8.03767	4.91504	3.14784e-06	3.60744e-05	4.11309
ADH1C	-2.49026	9.27984	-4.915	3.14837e-06	3.60744e-05	4.11293
IGFBP7	1.17544	10.2237	4.91161	3.1932e-06	3.65512e-05	4.09942
CCL2	1.89901	8.97724	4.91072	3.20512e-06	3.66663e-05	4.09586
NDUFB9	-0.586474	9.36242	-4.90944	3.22226e-06	3.68096e-05	4.09076
RNU1-106P	0.596715	6.47228	4.90875	3.23157e-06	3.68974e-05	4.08801
CAMK2N1	-0.860653	10.8504	-4.90759	3.2473e-06	3.70398e-05	4.08337
DNAJB11	0.591341	8.80071	4.90658	3.26095e-06	3.71768e-05	4.07936
OR2A9P	-0.612449	7.60938	-4.90611	3.26737e-06	3.7194e-05	4.07748
SLC2A14	0.85144	6.80685	4.90282	3.31249e-06	3.76322e-05	4.06437
FGD5	0.689063	6.44837	4.90228	3.31997e-06	3.76794e-05	4.06222
MYCBP2	0.664946	8.31971	4.90152	3.33049e-06	3.778e-05	4.0592
IGHV3-43	1.20486	12.7244	4.89981	3.35431e-06	3.80312e-05	4.05239
ATP11A	0.779844	7.58113	4.89806	3.37894e-06	3.82722e-05	4.0454
EHD3	0.850654	7.31552	4.89641	3.40229e-06	3.84599e-05	4.03882
TK1	0.674031	8.61389	4.89339	3.4454e-06	3.89085e-05	4.02679
FADS2	1.60625	8.52576	4.89222	3.46224e-06	3.90598e-05	4.02213
CTGF	0.901272	9.37241	4.8886	3.51478e-06	3.96133e-05	4.00774
LDHD	-1.02152	8.13694	-4.88846	3.51677e-06	3.9616e-05	4.0072
EFNA5	-0.781035	7.33391	-4.88757	3.52995e-06	3.97448e-05	4.00363
S1PR1	0.907279	6.12145	4.88484	3.57017e-06	4.00586e-05	3.9928
ORAI2	1.0725	7.88496	4.88212	3.61093e-06	4.0476e-05	3.98196
ADD3	-0.638323	8.99428	-4.88066	3.63288e-06	4.06679e-05	3.97617
ADAM9	0.752521	10.4668	4.8805	3.63531e-06	4.06689e-05	3.97553
SLC1A1	-1.05625	8.29779	-4.87922	3.65473e-06	4.08459e-05	3.97045
SPIRE2	-0.630637	8.35284	-4.87799	3.6734e-06	4.10142e-05	3.96558
THY1	1.43414	8.01434	4.87732	3.68376e-06	4.11096e-05	3.96289
AMT	-0.631874	7.33837	-4.87704	3.688e-06	4.11368e-05	3.96179
SRGN	1.60634	9.14685	4.87602	3.70371e-06	4.12715e-05	3.95773
EXPH5	-1.70318	7.74197	-4.87555	3.71093e-06	4.13316e-05	3.95587
ALPI	-0.65943	7.85887	-4.86948	3.80576e-06	4.22428e-05	3.93177
DENND5A	1.14899	7.78087	4.86447	3.88572e-06	4.30252e-05	3.91191
PAQR8	-0.731382	9.28447	-4.86194	3.92667e-06	4.34363e-05	3.9019
CAV2	0.974545	7.53629	4.8612	3.93887e-06	4.355e-05	3.89894
CTSK	1.61204	8.887	4.86067	3.94758e-06	4.36251e-05	3.89683
IGKC	1.55633	11.3648	4.85883	3.9778e-06	4.38949e-05	3.88955
GBAS	-0.686578	9.09965	-4.85853	3.98266e-06	4.39149e-05	3.88838
FSCN1	0.61251	8.4183	4.85848	3.98347e-06	4.39149e-05	3.88818
TMEM55A	0.836371	6.63079	4.85819	3.98826e-06	4.39463e-05	3.88704
TSC22D3	0.888732	8.34464	4.85693	4.00928e-06	4.41244e-05	3.88202
ITPR1	0.696905	6.86666	4.85592	4.02615e-06	4.4235e-05	3.87801
CD69	1.34538	6.87956	4.85245	4.08442e-06	4.47022e-05	3.86429
ANGPTL2	1.4365	8.21518	4.85167	4.09773e-06	4.48047e-05	3.86118
MRPS36	-0.643409	7.04767	-4.84789	4.1624e-06	4.54244e-05	3.84623
SERPINB9	1.4279	8.72181	4.84632	4.18953e-06	4.56765e-05	3.84003
PDPN	1.08881	7.15895	4.84416	4.22712e-06	4.60422e-05	3.8315
TNIK	-0.593332	7.99543	-4.84313	4.24529e-06	4.61958e-05	3.8274
APOL2	0.76836	7.21709	4.84233	4.25932e-06	4.63262e-05	3.82425
IGKV1-13	1.43432	9.72178	4.84034	4.29461e-06	4.66877e-05	3.81638
IFI44	1.08038	5.90215	4.83782	4.33959e-06	4.71541e-05	3.80643
CARD11	0.766404	7.09364	4.83577	4.37656e-06	4.75103e-05	3.79833
SRM	0.618246	9.63172	4.83477	4.3948e-06	4.76856e-05	3.79436
STPG1	-0.699415	7.03301	-4.83305	4.4261e-06	4.79564e-05	3.78759
SRGAP2	0.680113	7.61088	4.83279	4.43098e-06	4.79636e-05	3.78653
ANXA6	1.09937	9.61135	4.8316	4.45282e-06	4.81541e-05	3.78184
RRM2	0.960887	7.42499	4.83127	4.45889e-06	4.81738e-05	3.78054
PLCB1	0.828586	6.90221	4.83094	4.46493e-06	4.82161e-05	3.77925
ELL3	-0.583308	6.60501	-4.82959	4.48984e-06	4.84391e-05	3.77394
HPGD	-1.32572	10.1124	-4.82695	4.53918e-06	4.89017e-05	3.7635
BST2	1.05934	7.16962	4.82666	4.54459e-06	4.89367e-05	3.76237
COL4A2	1.15867	8.45248	4.82481	4.57948e-06	4.92175e-05	3.75507
KDR	1.36304	7.77802	4.82194	4.63419e-06	4.97366e-05	3.74373
SAMD9L	1.17578	9.69072	4.82174	4.63807e-06	4.97547e-05	3.74293
ZNF675	-0.802514	6.98611	-4.82126	4.64711e-06	4.98187e-05	3.74107
CD5	0.704628	7.552	4.81751	4.71964e-06	5.04391e-05	3.72629
ODC1	0.893194	10.3267	4.81591	4.75109e-06	5.07274e-05	3.71995
TSPAN5	0.66004	6.9206	4.81499	4.76903e-06	5.08712e-05	3.71636
PALMD	0.961444	6.40296	4.81311	4.80623e-06	5.11874e-05	3.70894
NDUFB3	-0.625643	7.1801	-4.81244	4.81949e-06	5.12638e-05	3.70631
NR1H4	-1.24333	4.96732	-4.81167	4.83478e-06	5.13554e-05	3.70329
PPP1R36	-0.695216	6.26234	-4.81134	4.84149e-06	5.13786e-05	3.70197
SPNS2	0.920931	8.9902	4.81047	4.8589e-06	5.15152e-05	3.69854
LOC344887	-1.09778	7.2066	-4.80685	4.93202e-06	5.2193e-05	3.68429
ADHFE1	-0.621062	5.82591	-4.80196	5.03242e-06	5.31564e-05	3.66506
MYEOV	0.943334	7.89562	4.79917	5.09048e-06	5.37447e-05	3.65411
P2RY8	1.0886	6.87097	4.79855	5.10357e-06	5.38578e-05	3.65166
PRKACB	-0.713418	9.30633	-4.79783	5.1187e-06	5.39924e-05	3.64884
THRA	-0.596634	8.52246	-4.79651	5.14675e-06	5.41876e-05	3.64362
HLA-DMB	0.952846	9.19365	4.79161	5.25159e-06	5.52227e-05	3.62438
ICOS	1.14216	5.87163	4.79127	5.25888e-06	5.52401e-05	3.62306
ALPL	1.55756	7.80794	4.79072	5.27079e-06	5.53397e-05	3.6209
RBMS1	1.02197	7.69368	4.79021	5.28189e-06	5.5405e-05	3.61889
TRIM16L	0.649771	8.52252	4.79003	5.28586e-06	5.5421e-05	3.61818
RFTN1	0.959448	7.69146	4.7894	5.29961e-06	5.55156e-05	3.6157
PYROXD1	-0.665545	8.57155	-4.78917	5.30448e-06	5.55156e-05	3.61482
SCARA3	0.605668	7.6895	4.78917	5.30467e-06	5.55156e-05	3.61479
RNY4P19	0.617129	6.84412	4.78517	5.39266e-06	5.63846e-05	3.59909
RAB23	0.696388	6.689	4.78381	5.42272e-06	5.66207e-05	3.59379
SORD	0.771328	8.89085	4.78146	5.47536e-06	5.71178e-05	3.58457
IGKV2D-28	1.39953	12.6024	4.77743	5.56694e-06	5.79135e-05	3.56875
PXDN	1.43371	8.56224	4.77023	5.73401e-06	5.93525e-05	3.54055
CMBL	-1.11991	9.24466	-4.76615	5.83076e-06	6.02168e-05	3.52459
MPC1	-0.676821	9.77571	-4.76573	5.84088e-06	6.02938e-05	3.52293
IGHV3OR16-8	1.29788	9.75125	4.76497	5.85914e-06	6.04274e-05	3.51996
HLA-DQB2	0.625497	7.99801	4.76437	5.87359e-06	6.05215e-05	3.51761
NNMT	1.23206	8.21564	4.76234	5.92256e-06	6.09492e-05	3.50969
FERMT2	1.10657	7.2525	4.76232	5.92315e-06	6.09492e-05	3.50959
PTPRC	1.57414	8.48345	4.75904	6.00328e-06	6.16898e-05	3.49678
EHD2	0.695211	8.33298	4.75699	6.05398e-06	6.21265e-05	3.48876
ARHGAP31	0.74301	7.73559	4.75589	6.08143e-06	6.23799e-05	3.48445
CSF2RB	1.24974	8.26386	4.75507	6.10191e-06	6.25618e-05	3.48124
IMPA2	-0.663852	7.36784	-4.7544	6.1187e-06	6.27056e-05	3.47862
EPB41L4A	0.613349	7.70699	4.75206	6.17754e-06	6.31945e-05	3.46949
CADM1	0.700412	6.90025	4.74778	6.28684e-06	6.4197e-05	3.45277
IGKV2D-40	3.23464	7.16631	4.7411	6.46102e-06	6.57686e-05	3.42671
CD2	0.728572	7.05852	4.73765	6.55297e-06	6.64959e-05	3.41324
FRY	0.671691	6.98346	4.73394	6.65309e-06	6.73614e-05	3.39879
ATP2B4	0.713924	8.32341	4.73152	6.71905e-06	6.79687e-05	3.38938
MAOA	-1.33121	8.72457	-4.72818	6.8114e-06	6.87497e-05	3.37637
TRIM16	0.655377	8.75901	4.72804	6.81545e-06	6.876e-05	3.3758
FAM65A	0.68479	7.51059	4.72504	6.89928e-06	6.94207e-05	3.36415
IL23R	-0.67213	5.41985	-4.72318	6.95201e-06	6.98894e-05	3.35689
ART3	0.900282	5.35783	4.71976	7.04971e-06	7.07463e-05	3.34359
COL6A2	0.727001	9.23443	4.71768	7.1096e-06	7.12844e-05	3.33553
ATP9A	-0.782414	8.93691	-4.71608	7.15613e-06	7.16244e-05	3.32931
NFE2L3	0.585629	7.95495	4.71479	7.194e-06	7.19717e-05	3.32428
IFI30	1.0809	10.0534	4.71349	7.23234e-06	7.22916e-05	3.31921
NR4A1	1.16812	8.14967	4.71083	7.31112e-06	7.28866e-05	3.30889
EDNRA	1.64219	7.29379	4.71024	7.32862e-06	7.30289e-05	3.30661
RN7SKP103	-0.59488	5.92037	-4.70768	7.40534e-06	7.36964e-05	3.29669
PTGR2	-0.582515	6.70987	-4.70748	7.41138e-06	7.37242e-05	3.29591
CEP70	-0.690278	6.54649	-4.70595	7.4579e-06	7.4122e-05	3.28995
SLC39A6	0.671862	7.61624	4.70571	7.46514e-06	7.4144e-05	3.28902
KLF7	1.0078	8.02777	4.70566	7.46663e-06	7.4144e-05	3.28883
GPR116	1.32611	7.0622	4.70523	7.47962e-06	7.42405e-05	3.28718
FMNL3	0.873823	7.34222	4.70498	7.48742e-06	7.42735e-05	3.28618
HLA-DRB5	1.68006	8.45842	4.70491	7.48949e-06	7.42735e-05	3.28592
PDE5A	-0.742734	7.7093	-4.70327	7.53975e-06	7.4724e-05	3.27955
OTC	-0.888918	5.07608	-4.70278	7.55467e-06	7.48219e-05	3.27766
E2F5	0.666882	7.87573	4.70085	7.6142e-06	7.52801e-05	3.27018
DDC	-0.937878	7.90699	-4.7007	7.61896e-06	7.52944e-05	3.26959
LGALSL	-0.620615	9.44976	-4.69952	7.65581e-06	7.56257e-05	3.26499
EVI2B	1.34886	9.52763	4.69805	7.70153e-06	7.60301e-05	3.25932
RNF125	-0.783522	7.86943	-4.69482	7.80361e-06	7.68859e-05	3.24677
MMP9	1.83067	8.57664	4.69481	7.8037e-06	7.68859e-05	3.24676
CARD8	0.718217	7.50136	4.69279	7.86809e-06	7.74867e-05	3.23893
MUC5B	1.28541	10.7909	4.68981	7.96415e-06	7.8263e-05	3.22737
SNORA24	0.915662	10.3633	4.68913	7.98603e-06	7.84441e-05	3.22476
PMFBP1	-0.648433	5.75706	-4.68762	8.03532e-06	7.886e-05	3.2189
FGFR1	0.58676	7.16716	4.68691	8.05836e-06	7.90179e-05	3.21617
RBP2	-0.640819	5.80563	-4.68573	8.09731e-06	7.93313e-05	3.21157
TFPI	1.30384	6.67974	4.68539	8.10824e-06	7.94041e-05	3.21029
LRRC32	0.713321	7.73171	4.68488	8.12526e-06	7.95365e-05	3.20829
FAR2	-0.626799	8.94594	-4.68102	8.25373e-06	8.0551e-05	3.19335
RN7SL473P	1.00604	7.65579	4.67673	8.39859e-06	8.1754e-05	3.17677
MPC2	-0.591873	9.73428	-4.67474	8.4666e-06	8.23348e-05	3.16909
IGHV1OR15-1	2.56498	9.15406	4.67462	8.47088e-06	8.23348e-05	3.16861
GULP1	-0.856796	6.35922	-4.67441	8.47803e-06	8.23507e-05	3.16781
LAMA4	1.07917	8.02365	4.67243	8.54653e-06	8.29806e-05	3.16014
EML1	0.827686	6.8862	4.67189	8.56523e-06	8.31267e-05	3.15806
LAX1	1.57619	7.57213	4.67048	8.61416e-06	8.34945e-05	3.15264
EFEMP2	0.690725	7.60382	4.67031	8.62004e-06	8.35158e-05	3.15199
SIK1	1.09891	8.00897	4.66944	8.65076e-06	8.37778e-05	3.1486
ZNF493	-0.604946	6.51388	-4.66836	8.6886e-06	8.40725e-05	3.14444
C6orf222	-0.749273	7.10758	-4.66372	8.85362e-06	8.54495e-05	3.12652
SLC6A9	-0.61664	8.27474	-4.66166	8.92781e-06	8.5993e-05	3.11858
FBXO34	-0.6316	9.05238	-4.65945	9.00806e-06	8.66835e-05	3.11005
HOOK1	-0.949471	7.95934	-4.65787	9.06577e-06	8.7165e-05	3.10397
CEP135	0.609697	6.516	4.65721	9.09017e-06	8.73626e-05	3.10141
XAF1	0.991196	8.50462	4.65695	9.09948e-06	8.7415e-05	3.10044
MSC	0.959628	6.95397	4.65592	9.13762e-06	8.77072e-05	3.09646
ACADSB	-0.838224	7.35502	-4.65543	9.15579e-06	8.78075e-05	3.09456
BDH1	-1.01332	8.17385	-4.65523	9.16311e-06	8.78406e-05	3.0938
GIMAP2	0.60059	6.7131	4.65129	9.31029e-06	8.90634e-05	3.07863
KPNA2	0.759139	9.82284	4.65059	9.33688e-06	8.92426e-05	3.07592
PKIA	0.607289	6.11275	4.64984	9.36509e-06	8.93994e-05	3.07304
GIMAP8	0.628207	6.69864	4.64912	9.39259e-06	8.96243e-05	3.07025
SMAP2	0.832744	9.26558	4.64843	9.41865e-06	8.98351e-05	3.06761
CXCL16	0.609289	8.664	4.6464	9.49644e-06	9.0501e-05	3.05978
HLA-DQA1	1.31399	11.3898	4.64241	9.65056e-06	9.18119e-05	3.04445
RNU5A-8P	1.23899	6.12798	4.64192	9.66963e-06	9.19202e-05	3.04258
SLC43A3	1.09653	8.41503	4.64086	9.71147e-06	9.22793e-05	3.03846
TNFAIP8	0.732012	7.18798	4.63935	9.77069e-06	9.27256e-05	3.03268
CAMK2D	-0.605678	9.03567	-4.63814	9.81862e-06	9.30798e-05	3.02802
CITED2	-0.598143	9.55085	-4.63763	9.83888e-06	9.32169e-05	3.02606
ACSL4	1.79664	7.93853	4.63687	9.86898e-06	9.34507e-05	3.02315
FKBP10	1.08272	8.01047	4.63633	9.8906e-06	9.35898e-05	3.02107
RAMP2	0.677154	7.20933	4.63604	9.90198e-06	9.36252e-05	3.01997
ARHGEF9	-0.775595	8.12734	-4.63565	9.91784e-06	9.36914e-05	3.01845
LSAMP	0.789951	6.81505	4.63495	9.94587e-06	9.38391e-05	3.01576
SLCO3A1	0.753878	8.39531	4.63279	1.00329e-05	9.45424e-05	3.00747
RHOH	1.37066	7.6325	4.63159	1.00817e-05	9.48582e-05	3.00285
C11orf54	-0.685209	8.75355	-4.63155	1.00831e-05	9.48582e-05	3.00271
NT5DC2	0.752284	8.36843	4.63134	1.00916e-05	9.48824e-05	3.00191
PCDH17	0.934238	7.31893	4.62743	1.02521e-05	9.61297e-05	2.98689
IGKV1D-43	1.77182	11.2992	4.6262	1.0303e-05	9.65273e-05	2.98218
NAALADL2	-0.920697	6.84763	-4.62561	1.03279e-05	9.67199e-05	2.97989
LMCD1	0.614328	7.65024	4.6253	1.03407e-05	9.67998e-05	2.97871
SLC7A2	0.769292	6.68646	4.62324	1.04268e-05	9.74458e-05	2.97081
PCK2	-0.747647	8.63545	-4.62255	1.04559e-05	9.7677e-05	2.96816
MAP4K4	0.738756	7.85436	4.61779	1.06584e-05	9.93622e-05	2.9499
MBNL3	-0.591779	8.75543	-4.61149	1.0932e-05	0.000101706	2.92579
MMRN2	0.631019	6.8435	4.60859	1.10603e-05	0.000102689	2.91469
CD79A	1.83316	9.28599	4.60392	1.127e-05	0.000104509	2.89681
CENPV	-0.75255	8.17156	-4.60326	1.12999e-05	0.0001047	2.89429
GPR137B	0.738193	8.70728	4.60143	1.13834e-05	0.000105249	2.88728
LOC102724453	1.40753	12.3427	4.60064	1.14195e-05	0.000105507	2.88427
EBF1	0.969904	7.16651	4.59706	1.15851e-05	0.000106733	2.87058
KLHL5	1.43741	6.94846	4.59686	1.15943e-05	0.000106775	2.86982
RN7SKP35	-0.895412	5.5935	-4.5967	1.1602e-05	0.000106803	2.86919
HCLS1	1.07702	7.57018	4.59579	1.16443e-05	0.000107083	2.86573
FLI1	1.04334	7.38615	4.59574	1.16466e-05	0.000107083	2.86554
DNAJB9	0.823075	8.18538	4.59447	1.17061e-05	0.000107586	2.86069
ITGB2	1.13361	8.47522	4.59313	1.17693e-05	0.000108079	2.85557
SLC46A1	-0.703316	7.78363	-4.59136	1.18535e-05	0.000108721	2.84879
COBL	-0.807614	7.60438	-4.58904	1.19641e-05	0.000109558	2.83995
NID2	0.844939	7.79599	4.58216	1.2299e-05	0.000112308	2.81369
TMEM109	0.592535	9.51174	4.57979	1.24161e-05	0.000113241	2.80468
GIPC2	-0.937316	8.33751	-4.57779	1.2516e-05	0.000114106	2.79706
SGIP1	0.829193	6.20798	4.57591	1.2611e-05	0.000114926	2.78986
PREX1	0.958225	8.04928	4.57428	1.26933e-05	0.000115584	2.78368
LRRC8C	0.675087	7.1274	4.57171	1.28245e-05	0.000116638	2.7739
SPTLC3	-0.765567	6.97383	-4.56758	1.30387e-05	0.000118396	2.75815
CD226	0.796831	6.01689	4.56689	1.30744e-05	0.000118673	2.75555
IGHV1OR15-9	0.688193	6.91831	4.56307	1.32761e-05	0.000120407	2.74099
KIF16B	-0.643264	8.10372	-4.55953	1.34651e-05	0.000121976	2.72755
HIST1H4C	0.648776	9.82933	4.55901	1.34932e-05	0.000122084	2.72557
RNA5SP260	-0.666493	7.5865	-4.55665	1.36208e-05	0.000122945	2.71662
ADM	1.0413	9.60022	4.55617	1.36471e-05	0.000123084	2.71479
EDN3	-1.03113	8.52896	-4.55484	1.37196e-05	0.000123688	2.70975
OAS3	0.76618	8.07121	4.55353	1.3792e-05	0.000124194	2.70474
PDGFRB	1.25486	8.0065	4.55298	1.38219e-05	0.000124413	2.70269
RN7SL386P	-0.608701	4.91572	-4.55029	1.39715e-05	0.00012566	2.69245
BDKRB1	-0.680104	7.74363	-4.54954	1.40134e-05	0.000125938	2.6896
KCNN3	0.758796	7.13528	4.54904	1.40413e-05	0.000126038	2.68772
SPATS2	0.641219	8.1736	4.54726	1.41415e-05	0.000126788	2.68095
CTLA4	0.91474	6.1042	4.54716	1.41471e-05	0.000126788	2.68058
SLC52A3	-0.641178	8.06174	-4.54449	1.42982e-05	0.000127991	2.67048
DYSF	1.31164	6.98034	4.54421	1.43144e-05	0.000128085	2.6694
UNC5CL	0.95105	6.64935	4.54321	1.43718e-05	0.000128548	2.6656
HTRA1	0.630923	8.46576	4.5426	1.44065e-05	0.000128808	2.66331
SLC16A7	0.620393	6.83641	4.54071	1.45154e-05	0.000129628	2.65615
ZNF814	-0.701549	6.53771	-4.53918	1.46044e-05	0.00013027	2.65033
NXPE3	1.03548	6.66396	4.53792	1.46781e-05	0.000130876	2.64555
CLEC1A	0.760957	5.70396	4.53704	1.47295e-05	0.00013118	2.64223
SNORA54	0.939577	7.8735	4.53521	1.48372e-05	0.000131942	2.63531
MX2	1.17782	7.17142	4.53459	1.48739e-05	0.000132206	2.63296
MS4A8	-1.27694	7.22305	-4.53412	1.4902e-05	0.000132352	2.63116
WWTR1	0.885727	7.79094	4.53335	1.49479e-05	0.000132656	2.62824
SACS	0.86828	6.21814	4.53199	1.50287e-05	0.000133269	2.62312
IL10RA	1.04327	8.08735	4.5302	1.51365e-05	0.000134173	2.61632
CCDC3	1.29	7.7565	4.52874	1.52248e-05	0.000134797	2.6108
ATM	0.878739	8.11984	4.52838	1.52463e-05	0.000134935	2.60945
FBN1	1.4518	7.65394	4.52733	1.53105e-05	0.000135398	2.60546
SNX10	0.998121	7.178	4.52695	1.53337e-05	0.00013555	2.60403
AKR1B10	-1.42822	8.55049	-4.52438	1.54912e-05	0.000136889	2.59431
CTDSPL	-0.739745	9.01049	-4.5193	1.58073e-05	0.000139249	2.57512
RNU6-701P	-0.603087	5.05559	-4.51759	1.59151e-05	0.000140144	2.56866
SCP2	-0.70637	8.83062	-4.51652	1.59826e-05	0.000140684	2.56464
CA2	-1.36245	10.3467	-4.5164	1.59907e-05	0.0001407	2.56416
TNFSF8	0.938916	7.37497	4.51605	1.60126e-05	0.000140839	2.56286
SLC39A5	-1.3845	9.13519	-4.51534	1.60582e-05	0.000141131	2.56016
TTC28	0.602872	6.71601	4.51365	1.61659e-05	0.000141912	2.55381
CLEC14A	0.719942	6.952	4.51059	1.63639e-05	0.000143429	2.54224
ZNF124	-0.772951	6.83382	-4.5097	1.64218e-05	0.000143881	2.53888
PON3	-0.838657	6.60636	-4.50853	1.64981e-05	0.000144419	2.53448
GM2A	0.675456	9.42463	4.50837	1.65086e-05	0.000144419	2.53387
NR5A2	-0.778399	9.25557	-4.50768	1.65542e-05	0.000144706	2.53125
IGKV1D-42	1.10039	13.0205	4.5065	1.66315e-05	0.00014527	2.52683
TIE1	0.685647	6.89855	4.50469	1.67518e-05	0.000146152	2.51998
JAZF1	0.584135	6.90665	4.50394	1.68015e-05	0.000146529	2.51717
RNF24	0.658551	7.79443	4.5017	1.69518e-05	0.000147613	2.50871
BCL6B	0.599144	7.1864	4.50113	1.69897e-05	0.00014783	2.50658
REG1A	3.56902	8.95936	4.50044	1.70368e-05	0.000148069	2.50396
CYTH4	1.12994	7.96057	4.49968	1.70878e-05	0.000148456	2.50112
FCGRT	-0.619053	9.26847	-4.4992	1.71202e-05	0.000148681	2.49932
LAPTM5	1.26827	10.1294	4.49307	1.75414e-05	0.000151816	2.47624
SAA2-SAA4	1.21291	5.86964	4.49265	1.75705e-05	0.00015201	2.47466
CLDN2	0.582361	6.56384	4.49173	1.76346e-05	0.000152449	2.4712
CPNE2	-0.64867	9.67364	-4.49047	1.77228e-05	0.000153094	2.46646
ZNF43	-0.710489	6.31952	-4.48829	1.7877e-05	0.00015425	2.45824
ARHGAP25	0.927484	7.01492	4.48786	1.79071e-05	0.000154452	2.45663
ABCA13	0.640934	5.96025	4.48715	1.79579e-05	0.000154783	2.45395
TIMP3	0.868662	7.73365	4.48713	1.79592e-05	0.000154783	2.45388
GLCCI1	1.04507	8.56475	4.48111	1.83922e-05	0.000158154	2.43126
RAB34	0.633665	7.03552	4.48071	1.8421e-05	0.000158343	2.42977
TMEM144	-0.912992	7.64546	-4.47859	1.85761e-05	0.00015932	2.42181
NOS2P3	0.673972	8.80104	4.47858	1.85768e-05	0.00015932	2.42177
GPR126	1.44723	8.91789	4.47753	1.8654e-05	0.000159801	2.41783
PARP14	0.868297	9.28879	4.47673	1.87129e-05	0.000160185	2.41484
ITGAL	0.924491	7.67913	4.47559	1.87978e-05	0.000160729	2.41054
EMP3	0.963368	8.44983	4.4748	1.88565e-05	0.000161131	2.40758
LGALS1	0.857558	10.1377	4.47292	1.89973e-05	0.000161862	2.40052
PLEK	2.07848	7.66146	4.4729	1.89986e-05	0.000161862	2.40045
SLC16A4	1.1168	6.50656	4.47156	1.90995e-05	0.000162575	2.39542
FMNL1	0.845707	7.90161	4.47136	1.91145e-05	0.000162621	2.39468
MZB1	1.41201	8.62979	4.46873	1.93142e-05	0.000164095	2.38481
LRRC75A	-0.8532	8.89269	-4.46828	1.93487e-05	0.000164326	2.38312
PTK6	-0.620676	8.97512	-4.46799	1.93702e-05	0.000164448	2.38206
MYCT1	0.821559	6.18553	4.4666	1.94771e-05	0.000165191	2.37684
COL5A1	0.62635	7.65737	4.46657	1.94796e-05	0.000165191	2.37671
SNX2	-0.674523	9.47609	-4.46601	1.95224e-05	0.000165431	2.37463
IRAK2	0.810718	7.27026	4.46476	1.96194e-05	0.000166129	2.36992
MT-TL2	-1.02046	10.5895	-4.46183	1.98472e-05	0.000167682	2.35897
MYBL2	0.728091	8.19741	4.4592	2.00542e-05	0.000169175	2.34912
GMPR	0.847661	7.49001	4.45911	2.00612e-05	0.000169175	2.34879
SLC1A4	0.744522	8.15235	4.45778	2.01669e-05	0.000170004	2.3438
TP53INP2	-0.63376	9.18928	-4.45305	2.0546e-05	0.000172943	2.32612
RAB31	1.29363	9.69228	4.45246	2.0594e-05	0.000173177	2.32391
ERO1LB	0.730133	6.05366	4.4505	2.07535e-05	0.000174371	2.31659
NR4A3	1.04272	6.77066	4.4505	2.0754e-05	0.000174371	2.31656
MS4A12	-2.41739	10.3327	-4.44751	2.09999e-05	0.000176241	2.30538
FCGR3A	1.41728	7.22088	4.44713	2.10308e-05	0.000176435	2.30399
HNF4G	-1.09165	8.47993	-4.4466	2.10751e-05	0.000176741	2.30199
BCL2L14	-0.580461	7.22563	-4.44491	2.1216e-05	0.000177857	2.29567
COL3A1	1.30553	9.73532	4.44362	2.13237e-05	0.000178694	2.29086
AQP9	2.66624	7.43348	4.44304	2.13725e-05	0.000178971	2.28869
PLSCR4	-0.581349	7.81189	-4.44124	2.15241e-05	0.000180108	2.28198
IGLV6-57	1.82956	8.76594	4.44064	2.15753e-05	0.000180469	2.27973
MMP2	1.57856	9.38296	4.43634	2.19432e-05	0.000182884	2.26369
NUP210	0.701229	8.17739	4.43632	2.19444e-05	0.000182884	2.26363
IGKV1OR2-108	0.99368	7.55036	4.43554	2.20123e-05	0.000183129	2.2607
GZMB	0.723826	6.97422	4.43551	2.20142e-05	0.000183129	2.26062
GPX7	0.948358	8.15257	4.43353	2.21865e-05	0.00018436	2.25322
TIPARP	0.591704	8.98659	4.43319	2.22166e-05	0.000184542	2.25194
CPEB4	0.711052	8.58069	4.42948	2.25421e-05	0.000186973	2.23813
STX2	0.755628	7.04186	4.42809	2.26662e-05	0.000187594	2.23293
AKR7L	-0.584795	6.82192	-4.42513	2.2931e-05	0.000189506	2.22191
VIPR1	-1.30874	8.70116	-4.42475	2.29646e-05	0.000189715	2.22052
RECQL	0.712716	6.87225	4.42428	2.30075e-05	0.00019	2.21875
ELMO1	1.10367	8.16593	4.42114	2.32922e-05	0.000192142	2.20708
BCL6	1.20249	7.58374	4.41792	2.35881e-05	0.000194159	2.19511
QKI	0.862424	7.12514	4.41746	2.36315e-05	0.000194446	2.19336
ZSWIM5	-0.70799	8.03458	-4.4172	2.36551e-05	0.00019457	2.19242
EMR2	1.39271	7.7536	4.41698	2.36756e-05	0.000194668	2.19159
IL1A	1.84157	6.54079	4.41623	2.37451e-05	0.000194957	2.18881
TRPM4	-0.707162	8.82475	-4.41482	2.38768e-05	0.000195968	2.18357
COL12A1	1.85979	8.26002	4.41393	2.396e-05	0.000196508	2.18027
LRG1	0.601383	8.07035	4.41357	2.39941e-05	0.000196623	2.17892
RASGRP1	0.964348	7.23333	4.41258	2.40878e-05	0.000197272	2.17522
RN7SL769P	0.614184	9.08383	4.41232	2.41125e-05	0.000197402	2.17425
GYPC	0.750089	7.60758	4.41071	2.42645e-05	0.000198432	2.16829
CHAC1	0.867779	7.52725	4.40857	2.44692e-05	0.000199638	2.16032
PRRX1	1.45803	7.31627	4.40852	2.44735e-05	0.000199638	2.16016
PTP4A1P7	-0.608715	8.07953	-4.40781	2.45414e-05	0.00020012	2.15753
PARP9	0.993972	8.20124	4.40658	2.46597e-05	0.000200941	2.15297
MIR200C	-0.795756	6.71509	-4.40546	2.47686e-05	0.000201756	2.14879
SKIL	0.675165	8.33088	4.40357	2.49521e-05	0.000203032	2.14179
TFF1	1.38337	10.5277	4.40221	2.50857e-05	0.000203973	2.13673
FGF2	0.945681	7.78442	4.39797	2.55049e-05	0.000206789	2.12101
AEBP1	0.770544	8.52713	4.39781	2.55209e-05	0.000206804	2.12041
PBX1	-0.649687	8.5053	-4.39585	2.57176e-05	0.000207994	2.11314
MIR192	-1.13898	7.91847	-4.39412	2.58913e-05	0.000209105	2.10675
S100B	0.661166	6.13108	4.39222	2.60848e-05	0.000210514	2.09969
AHNAK2	0.868676	6.64052	4.39138	2.61705e-05	0.00021113	2.09658
TRPS1	1.02756	6.80603	4.39074	2.62361e-05	0.000211584	2.09421
TSPAN11	0.836757	7.71845	4.38845	2.6472e-05	0.00021326	2.08572
REG3A	3.13291	7.7021	4.38822	2.64959e-05	0.000213376	2.08487
MRC2	0.694144	7.91198	4.38576	2.67512e-05	0.000215127	2.07578
TPK1	0.905385	7.14815	4.38414	2.69203e-05	0.000216147	2.0698
BTNL8	-1.27362	8.76127	-4.38068	2.72865e-05	0.000218742	2.057
ADAMTSL1	-0.614272	6.15336	-4.38067	2.72874e-05	0.000218742	2.05696
TMEM45A	1.0976	5.87514	4.38013	2.73449e-05	0.000219049	2.05497
MR1	0.626627	7.15416	4.37915	2.74502e-05	0.000219737	2.05133
RGS1	1.37303	6.26929	4.37522	2.78735e-05	0.000222811	2.03682
SLC22A23	-0.792708	8.45829	-4.3744	2.79629e-05	0.00022329	2.03378
SECTM1	-0.840973	9.18126	-4.37362	2.80479e-05	0.000223891	2.03091
PRKCH	0.788355	8.2884	4.37016	2.8429e-05	0.000226693	2.01812
RARRES3	0.784764	8.90896	4.36992	2.84558e-05	0.000226748	2.01722
SHH	0.604842	8.26004	4.36954	2.8498e-05	0.000227004	2.01582
MFGE8	0.871413	8.61964	4.36904	2.85536e-05	0.000227315	2.01397
GAL3ST1	-0.584441	7.44859	-4.36271	2.92649e-05	0.000232461	1.99065
MFSD2A	0.808007	8.32054	4.35983	2.95948e-05	0.000234429	1.98003
THEMIS2	1.10536	7.8669	4.35952	2.96305e-05	0.000234627	1.97889
SCN9A	-0.82592	5.72489	-4.359	2.96909e-05	0.000234888	1.97696
CD80	1.07851	6.32592	4.35893	2.96993e-05	0.000234888	1.97669
LOC100508226	-0.678453	5.95008	-4.35888	2.97049e-05	0.000234888	1.97651
CSGALNACT2	0.978704	7.59079	4.35741	2.98743e-05	0.000236063	1.97112
SERPINB8	0.735684	8.45092	4.35709	2.99122e-05	0.000236198	1.96992
C1orf210	-1.04805	8.94316	-4.35668	2.99592e-05	0.000236487	1.96843
GALNT12	-1.14506	9.29821	-4.35506	3.01485e-05	0.000237675	1.96247
APCDD1	0.741033	8.15849	4.3542	3.02502e-05	0.00023837	1.95927
LGI2	0.698994	6.42557	4.3541	3.02619e-05	0.000238379	1.95891
DOCK11	1.01115	7.6321	4.35368	3.03115e-05	0.000238623	1.95736
NLRC5	0.588614	8.31842	4.35099	3.06293e-05	0.000240856	1.94747
FBXW7	0.686725	7.28728	4.34899	3.08686e-05	0.000242339	1.9401
RIMKLA	-0.686449	7.94392	-4.34885	3.08847e-05	0.00024236	1.93961
TM4SF5	-0.651076	7.80427	-4.34843	3.09356e-05	0.00024246	1.93805
HADH	-0.737936	8.98848	-4.34839	3.09401e-05	0.00024246	1.93791
CR1	1.53833	6.55905	4.34799	3.09887e-05	0.000242757	1.93642
FAM20C	0.75659	8.65184	4.34682	3.11296e-05	0.000243777	1.93212
NDRG2	-0.842068	9.45595	-4.34561	3.12764e-05	0.000244758	1.92767
GMFG	1.1324	8.06661	4.3455	3.12895e-05	0.000244776	1.92727
APOBEC3G	0.928483	6.7124	4.34456	3.14035e-05	0.000245499	1.92383
MMP10	1.74103	6.49775	4.34406	3.14651e-05	0.000245896	1.92197
THRB	-1.07406	7.17789	-4.34312	3.15798e-05	0.000246707	1.91852
GIMAP7	0.742748	7.07333	4.34073	3.18737e-05	0.00024849	1.90975
CLDN12	0.728506	10.1394	4.33838	3.21655e-05	0.000250503	1.90112
ECT2	0.717444	7.82181	4.33781	3.22372e-05	0.000250722	1.89901
PLEKHO1	0.58647	7.09785	4.33195	3.29767e-05	0.00025586	1.87752
TNFAIP2	0.933849	8.28634	4.33173	3.3006e-05	0.000255912	1.87668
PIP4K2A	0.661648	8.29463	4.33006	3.32194e-05	0.000256865	1.87058
CXCL8	2.35751	8.43987	4.32869	3.33958e-05	0.000258141	1.86556
BIRC3	1.47364	8.79162	4.32801	3.3484e-05	0.000258646	1.86307
CGN	-0.819921	8.36136	-4.32319	3.41144e-05	0.000262712	1.8454
COL6A1	0.921391	9.26512	4.32306	3.4132e-05	0.000262758	1.84491
CHN1	1.24394	6.55882	4.32246	3.42109e-05	0.000263119	1.84273
IL21R	0.67182	6.77677	4.32	3.45378e-05	0.000265433	1.83372
CD38	1.31137	7.94711	4.31775	3.48396e-05	0.000267209	1.82549
RAPGEF4	0.580485	6.33829	4.313	3.54852e-05	0.000271886	1.8081
RBMS3	0.677641	6.8233	4.311	3.57605e-05	0.000273651	1.80078
MGP	1.57003	7.40477	4.31098	3.57638e-05	0.000273651	1.8007
TFAP2C	0.715923	6.00171	4.31069	3.58039e-05	0.000273854	1.79964
SLAMF1	1.04659	6.1869	4.31061	3.58144e-05	0.000273854	1.79936
CYP3A4	-1.28153	4.93535	-4.31028	3.58603e-05	0.000274112	1.79815
PTCH2	0.698418	7.34923	4.31017	3.58755e-05	0.000274136	1.79774
VNN2	1.92093	6.54318	4.30813	3.61592e-05	0.000276211	1.79029
LAMP3	1.14741	7.64812	4.30716	3.62955e-05	0.000277159	1.78673
NFATC2	0.648534	7.88878	4.30698	3.63207e-05	0.000277258	1.78607
LRRC1	-0.720575	8.46283	-4.3068	3.63458e-05	0.000277356	1.78542
EGR3	0.755261	6.67282	4.3049	3.66125e-05	0.00027911	1.77849
FAM13A	-0.587951	7.837	-4.3022	3.69965e-05	0.000281565	1.76862
SLC4A11	0.596011	7.37392	4.3021	3.70097e-05	0.000281572	1.76828
CLMP	0.896171	7.395	4.29811	3.75849e-05	0.000285113	1.75368
SEMA4A	0.706831	7.5739	4.29808	3.75883e-05	0.000285113	1.7536
ITGA2	1.14259	9.84079	4.29455	3.81042e-05	0.000288545	1.74069
GRAMD1A	0.621839	8.26524	4.29418	3.81573e-05	0.000288754	1.73938
MYH10	0.621529	6.77388	4.29339	3.82739e-05	0.000289444	1.73649
GPCPD1	0.604898	8.47149	4.29201	3.84786e-05	0.000290702	1.73144
C5orf30	-0.888715	8.51601	-4.29087	3.86471e-05	0.000291393	1.72731
SYTL4	-0.583742	7.24075	-4.28998	3.87795e-05	0.000292197	1.72407
LCP2	1.25806	8.70832	4.28877	3.89605e-05	0.000293269	1.71966
MAGI3	-0.651674	8.20061	-4.28868	3.89741e-05	0.000293274	1.71933
CNNM4	-0.84732	9.77866	-4.28605	3.93712e-05	0.000295871	1.70974
CD200	0.695313	7.81294	4.28125	4.01049e-05	0.000300489	1.69227
KRT7	0.869722	7.64523	4.27883	4.04798e-05	0.0003024	1.68346
ITGAX	1.39596	7.85645	4.27711	4.07487e-05	0.000304309	1.6772
CD177	-1.92305	10.6463	-4.27455	4.11514e-05	0.000306711	1.66789
PXMP2	-0.720311	8.26736	-4.27438	4.11776e-05	0.000306806	1.66729
PCDH20	-1.1829	6.74212	-4.27335	4.13413e-05	0.000307823	1.66354
HRCT1	-0.801205	7.70395	-4.27093	4.17272e-05	0.000310188	1.65475
DSE	0.996796	7.43382	4.27069	4.17664e-05	0.000310378	1.65386
MAP4K1	0.702686	6.95235	4.27042	4.18088e-05	0.00031049	1.6529
HTR4	-0.928791	7.09445	-4.26829	4.21516e-05	0.000312729	1.64518
BATF2	0.686256	8.45042	4.26786	4.22224e-05	0.000313149	1.64359
FCRL5	1.54644	7.12328	4.26777	4.22358e-05	0.000313149	1.64329
CLDN8	-2.85901	6.23235	-4.267	4.23616e-05	0.000313877	1.64048
TOM1L1	-0.630645	7.67214	-4.26495	4.26961e-05	0.000315657	1.63304
ANKRD20A3	-0.678615	6.31401	-4.26487	4.2709e-05	0.000315657	1.63275
MME	1.4151	7.04006	4.26477	4.27249e-05	0.000315657	1.6324
SLCO1B3	2.21907	5.95488	4.26379	4.28857e-05	0.000316726	1.62884
SELL	1.81061	7.69812	4.26338	4.29536e-05	0.000317002	1.62735
SHCBP1	0.751509	6.99195	4.2628	4.30493e-05	0.000317349	1.62524
MASP1	0.839175	6.33556	4.26273	4.30615e-05	0.000317349	1.62498
CCR6	0.666136	6.19094	4.26269	4.30678e-05	0.000317349	1.62484
HLA-DOB	1.06071	6.74187	4.26233	4.3127e-05	0.000317682	1.62354
NUDT12	-0.769419	7.26105	-4.2563	4.4136e-05	0.000324588	1.60166
GVINP1	0.836799	6.68469	4.25342	4.46254e-05	0.00032734	1.59123
PPP1R18	0.697505	7.71662	4.25186	4.48916e-05	0.00032908	1.58561
ARHGAP24	0.609635	6.54158	4.25071	4.50905e-05	0.000330285	1.58143
TMEM154	1.09218	7.48641	4.24985	4.52397e-05	0.000331203	1.57831
EPC1	0.674255	9.6426	4.24899	4.53888e-05	0.000332188	1.5752
THSD7A	0.599812	6.12877	4.24615	4.58837e-05	0.000335594	1.56494
JAM3	0.705848	7.17332	4.2457	4.59632e-05	0.000335898	1.5633
FAM160A1	-0.877217	8.24161	-4.24564	4.59744e-05	0.000335898	1.56307
ALDH1A2	1.06997	6.64641	4.2439	4.62815e-05	0.000337851	1.55678
FABP1	-1.36811	9.80211	-4.2413	4.6743e-05	0.000340563	1.5474
WNT5A	1.57099	7.21757	4.24119	4.67625e-05	0.000340596	1.547
MT2A	-0.637162	12.1695	-4.23735	4.74545e-05	0.000345193	1.53311
KIAA0040	0.697988	8.45034	4.23628	4.76487e-05	0.000346273	1.52925
HOXB6	-0.630496	7.64339	-4.23521	4.7843e-05	0.000347351	1.52541
CYTIP	1.39408	7.98025	4.235	4.78814e-05	0.000347519	1.52465
GDPD2	-0.889137	6.50206	-4.23406	4.80547e-05	0.000348331	1.52123
SNORA8	0.650057	8.75776	4.23318	4.82162e-05	0.00034939	1.51806
SLC9A3	-1.45085	9.08948	-4.23175	4.84805e-05	0.000350746	1.51289
CD274	1.6432	6.82331	4.23128	4.85666e-05	0.000351257	1.51121
ARHGEF6	0.895716	7.06616	4.23078	4.86604e-05	0.000351713	1.50939
SLA	1.03288	7.06253	4.23072	4.86717e-05	0.000351713	1.50917
KLHL6	1.05652	8.0301	4.23056	4.87015e-05	0.000351785	1.50859
CD53	1.38756	9.28171	4.22991	4.88211e-05	0.000352406	1.50628
FN1	1.24045	9.4589	4.22984	4.8834e-05	0.000352406	1.50602
HGF	1.40562	6.68342	4.22957	4.88841e-05	0.000352543	1.50506
FMOD	0.783438	8.27976	4.22727	4.93153e-05	0.000354864	1.49676
PDE10A	0.731609	5.62965	4.2258	4.95928e-05	0.000356522	1.49145
DDIT4	0.996245	7.937	4.22305	5.01153e-05	0.000359709	1.48154
CD27	1.18453	8.35779	4.22014	5.06745e-05	0.000363149	1.47106
SRPX2	1.02143	7.30474	4.21921	5.08544e-05	0.000364323	1.46771
CMTM3	0.603665	7.90306	4.21889	5.0917e-05	0.000364656	1.46655
SLPI	0.970756	10.2465	4.21847	5.09988e-05	0.000365127	1.46503
GZMK	1.39206	6.37832	4.21796	5.10974e-05	0.000365603	1.4632
SLC4A4	-1.47406	9.91784	-4.21266	5.21389e-05	0.000372234	1.44414
IGKV1D-8	1.29772	7.03102	4.21114	5.2442e-05	0.000373927	1.43866
ITK	0.768879	6.83958	4.21084	5.2501e-05	0.000374231	1.4376
CA1	-2.40998	9.0942	-4.21047	5.25763e-05	0.00037465	1.43624
SELE	2.09001	6.88016	4.20697	5.32811e-05	0.000378958	1.42366
TCEA3	-1.05252	8.92778	-4.20557	5.3564e-05	0.000380732	1.41866
GBP5	1.70026	7.33357	4.20504	5.36727e-05	0.000381147	1.41674
SH3BP5	0.694025	7.06067	4.20316	5.40574e-05	0.000383519	1.40999
LNX2	-0.636759	9.37533	-4.2007	5.45655e-05	0.000386641	1.40116
SLC16A14	0.921696	7.82711	4.19499	5.57613e-05	0.000394007	1.38068
POU2AF1	1.06645	7.84387	4.19355	5.60672e-05	0.000395308	1.37551
MOP-1	0.600793	4.95189	4.19239	5.63138e-05	0.000396923	1.37137
DOCK8	1.05258	8.12951	4.19153	5.64978e-05	0.000397973	1.36828
GUCY1B3	0.953226	6.73057	4.1896	5.69132e-05	0.000400402	1.36136
NAP1L1	0.713282	8.55937	4.18913	5.70155e-05	0.000400874	1.35967
SATB2	-1.19462	10.3991	-4.18475	5.79707e-05	0.000406834	1.34398
HHEX	0.620225	7.14457	4.18179	5.86233e-05	0.000410779	1.3334
ADA	0.618451	7.46672	4.17955	5.9124e-05	0.00041365	1.32537
GREM1	1.52018	9.56982	4.17859	5.93404e-05	0.000414908	1.32192
MGAT4B	-0.613841	8.81622	-4.17812	5.94444e-05	0.000415507	1.32027
HDHD3	-0.64947	8.71301	-4.17733	5.96222e-05	0.000416525	1.31745
MST1L	-0.76378	6.97807	-4.17596	5.99343e-05	0.000418416	1.31252
KITLG	-0.600603	6.71907	-4.17134	6.09908e-05	0.000424747	1.29602
SAMSN1	1.14564	5.91597	4.17078	6.11184e-05	0.000425506	1.29405
MCTP1	1.12381	7.08228	4.16614	6.22018e-05	0.000432386	1.27746
IHH	-0.842691	8.37408	-4.1652	6.24224e-05	0.000433786	1.27412
MMP19	0.824123	6.98578	4.16481	6.25159e-05	0.000434303	1.2727
ANKRD22	0.970145	8.72458	4.16419	6.26621e-05	0.000435052	1.2705
LOC102725104	-0.676473	5.52347	-4.16219	6.31368e-05	0.000437679	1.26338
STX11	1.23154	7.97434	4.16134	6.33385e-05	0.000438676	1.26036
SPA17	-0.652704	8.4266	-4.16039	6.3568e-05	0.000439939	1.25695
TST	-0.807692	10.6853	-4.1578	6.4193e-05	0.000443377	1.24772
TM6SF2	-0.925341	7.43052	-4.15709	6.43641e-05	0.000444423	1.2452
CD180	1.57444	7.10501	4.15495	6.48872e-05	0.000447763	1.23756
FOSB	1.28285	7.64856	4.15485	6.49097e-05	0.000447782	1.23724
ENDOD1	-0.786399	8.98607	-4.15447	6.50043e-05	0.000448298	1.23586
AOAH	-0.703252	8.38034	-4.15293	6.53825e-05	0.000450597	1.23039
CES3	-1.07698	8.82129	-4.15135	6.57738e-05	0.000452781	1.22475
NFKBIA	0.696817	10.5002	4.14955	6.62208e-05	0.000455563	1.21836
BCAT2	-0.614575	7.85015	-4.14846	6.64938e-05	0.000457044	1.21448
CAPN13	-1.50996	6.95857	-4.14754	6.67244e-05	0.000458213	1.21121
ACSS2	-0.840177	9.59673	-4.14376	6.76821e-05	0.000463808	1.19776
TSPAN6	-0.916715	9.53244	-4.14088	6.84207e-05	0.000468445	1.18752
CCR4	0.69618	6.16512	4.14033	6.85617e-05	0.000469128	1.18558
SLC6A19	-1.32883	6.98812	-4.14012	6.86156e-05	0.000469356	1.18484
TIMP2	0.758499	9.31153	4.13588	6.97202e-05	0.000475479	1.16977
CD37	1.15325	8.25117	4.13314	7.04419e-05	0.000479995	1.16006
AGMO	-0.724524	4.73303	-4.13313	7.04458e-05	0.000479995	1.16
BEST2	-1.60627	7.55797	-4.1325	7.06124e-05	0.000480842	1.15778
CXCL10	2.25496	7.93196	4.13165	7.08375e-05	0.000482219	1.15477
IFI44L	1.19915	6.60846	4.129	7.15474e-05	0.000486334	1.14537
PLA1A	0.860911	6.70935	4.12887	7.15813e-05	0.000486418	1.14492
ACOT11	-0.611886	8.36688	-4.12622	7.2298e-05	0.000490116	1.13552
GLIPR1	1.37728	8.50891	4.1259	7.23862e-05	0.000490567	1.13437
DPYSL3	0.783954	7.8478	4.12524	7.25664e-05	0.000491348	1.13203
VCAN	1.36837	8.33645	4.12041	7.38942e-05	0.000499297	1.11492
CPXM1	0.793671	6.94231	4.12012	7.39736e-05	0.000499685	1.11391
CEMIP	1.87774	7.73591	4.11934	7.4191e-05	0.000501005	1.11114
AP1S3	0.659493	7.15499	4.11625	7.50551e-05	0.000506416	1.10022
ARHGAP15	1.02827	6.84517	4.11624	7.50592e-05	0.000506416	1.10017
NHSL1	-0.899898	8.90497	-4.11181	7.63142e-05	0.000514119	1.08454
SPG20	0.70887	6.25526	4.11106	7.65292e-05	0.000515109	1.08188
ZG16B	0.845086	9.89608	4.11076	7.66159e-05	0.00051554	1.08081
VIL1	-1.01288	9.90923	-4.11049	7.66951e-05	0.00051592	1.07984
KCNA3	1.18579	7.22404	4.10947	7.69885e-05	0.000517587	1.07624
OLFML2B	0.971243	6.56766	4.10682	7.77564e-05	0.000522286	1.06688
CA4	-1.31841	9.42629	-4.10646	7.786e-05	0.000522827	1.06563
LRRCC1	-0.618885	7.74671	-4.10314	7.88341e-05	0.000528454	1.0539
SP140	0.947915	6.9886	4.0994	7.99457e-05	0.000534934	1.0407
RN7SL600P	0.980414	7.23372	4.09868	8.01599e-05	0.000536052	1.03818
KCNJ2	-0.736024	8.00658	-4.09712	8.06315e-05	0.000538571	1.03265
SERPINB7	2.30821	6.40535	4.09647	8.08253e-05	0.000539548	1.03039
CR1L	0.765615	5.09394	4.09439	8.14562e-05	0.0005436	1.02306
GSTM4	-0.788187	8.90473	-4.09381	8.16358e-05	0.000544319	1.02098
FAM49A	1.0806	7.71337	4.09349	8.17334e-05	0.00054481	1.01986
CDHR1	-1.60856	7.67276	-4.09275	8.19575e-05	0.000545662	1.01728
SLC6A20	1.21355	7.90592	4.09204	8.21754e-05	0.000546953	1.01477
TNFSF13B	0.842592	7.1432	4.09168	8.22858e-05	0.000547527	1.01351
IGKV6-21	2.00677	8.39264	4.08857	8.32485e-05	0.000553035	1.00255
CES2	-0.929358	10.1205	-4.08853	8.32596e-05	0.000553035	1.00242
GHR	-1.35551	6.19724	-4.08831	8.33283e-05	0.000553329	1.00164
LOC101930405	1.17673	6.8891	4.08628	8.39633e-05	0.000557057	0.994487
MBOAT1	-0.691138	9.88117	-4.08614	8.40083e-05	0.000557193	0.993982
S100A9	1.68736	8.0778	4.08544	8.42275e-05	0.000558158	0.991526
MOGAT2	-1.2314	8.26092	-4.08521	8.43008e-05	0.00055848	0.990707
TLN2	-0.690493	7.82223	-4.08493	8.43866e-05	0.000558886	0.989748
IGKV1D-27	2.0677	9.57922	4.08351	8.48364e-05	0.000561537	0.984738
FAM65B	1.25587	7.01027	4.08246	8.51675e-05	0.0005634	0.981067
SLAMF6	1.24847	7.12052	4.08171	8.54067e-05	0.000564779	0.978424
PTP4A3	1.01218	8.37534	4.081	8.56347e-05	0.000565996	0.975912
RN7SL368P	1.45913	7.59703	4.08056	8.57748e-05	0.000566593	0.974371
LDLRAD3	0.684204	7.74041	4.08017	8.58983e-05	0.000567243	0.973016
NCKAP1L	1.0793	7.75943	4.07904	8.62611e-05	0.000569143	0.969044
IGKV2D-24	1.58423	10.2791	4.07867	8.63827e-05	0.00056978	0.967716
ST8SIA4	1.12422	6.83037	4.07737	8.6802e-05	0.000571881	0.963154
DERL3	0.934051	8.05554	4.07722	8.68485e-05	0.000572021	0.96265
TNFRSF9	1.12499	7.00228	4.07638	8.71217e-05	0.00057299	0.95969
SLC37A2	-1.28152	6.98724	-4.07473	8.76581e-05	0.000575851	0.953907
IL17RB	-0.67545	6.97379	-4.07361	8.80275e-05	0.000577994	0.949945
RND1	1.03775	7.38923	4.07143	8.87435e-05	0.000582139	0.942312
TSHZ3	0.588541	6.8463	4.071	8.88868e-05	0.000582742	0.940792
SPON2	0.784694	7.38646	4.069	8.95514e-05	0.000586592	0.933773
TXLNB	0.59147	5.49814	4.06631	9.04527e-05	0.000591813	0.924339
ENPP3	-0.956615	7.83742	-4.06414	9.11844e-05	0.000596085	0.91675
A2M	1.03966	10.4655	4.06363	9.13587e-05	0.000597052	0.914952
CSGALNACT1	0.947727	6.13651	4.06317	9.15157e-05	0.000597906	0.913334
WISP1	0.921471	7.33547	4.06128	9.21598e-05	0.000601422	0.906728
STX19	-0.917375	7.53694	-4.06012	9.25595e-05	0.000603857	0.902651
PRR5L	-0.797433	8.48729	-4.05985	9.26525e-05	0.00060429	0.901705
SERPINE1	1.6958	7.98063	4.05918	9.28846e-05	0.000605109	0.899349
ZDBF2	0.610567	5.58697	4.05738	9.35073e-05	0.000608642	0.893056
GJC1	0.765788	6.88073	4.05659	9.37808e-05	0.000610247	0.890305
MYO1A	-1.07725	9.38565	-4.05389	9.47276e-05	0.000615797	0.880844
CD3D	0.630631	7.34815	4.05261	9.518e-05	0.000617935	0.876358
STARD4	0.614363	8.0942	4.05195	9.54132e-05	0.000619273	0.874052
LUM	1.37804	9.44698	4.05032	9.59892e-05	0.0006223	0.868384
SEMA7A	0.867283	7.74538	4.04525	9.78132e-05	0.00063232	0.850659
STAP2	-0.912776	8.50666	-4.04378	9.83504e-05	0.000635069	0.845502
ANKRD20A8P	-0.637697	6.13863	-4.03899	0.000100112	0.000644426	0.828791
SYTL3	0.597432	6.38637	4.03789	0.000100521	0.000646693	0.824952
SPINK4	1.83368	9.66584	4.03464	0.000101739	0.000653787	0.813615
FCN3	1.02564	7.22501	4.03244	0.00010257	0.000658674	0.805957
TTC38	-0.586959	9.06925	-4.02922	0.0001038	0.000664136	0.794737
LRRC66	-1.00061	7.02769	-4.02756	0.000104438	0.000667013	0.788961
MOXD1	0.742813	6.06234	4.02529	0.000105318	0.000672226	0.781064
FZD5	-0.873982	9.471	-4.02517	0.000105366	0.000672342	0.780637
GJA5	0.701434	5.78813	4.02466	0.000105563	0.000673217	0.778885
IL1RAP	0.817642	6.63069	4.02373	0.000105928	0.00067517	0.77563
ZNF737	-0.6843	8.76101	-4.02347	0.00010603	0.000675493	0.774731
RASGRP3	1.17249	6.78187	4.01661	0.00010875	0.000689866	0.750887
LILRB2	1.08189	7.61139	4.00993	0.000111463	0.000704124	0.727704
PYHIN1	0.599721	6.28157	4.00818	0.000112184	0.000708032	0.721635
TNFRSF1B	0.676048	8.45562	4.00813	0.000112206	0.000708032	0.721451
CASP6	-0.652754	7.84096	-4.00276	0.000114451	0.00072082	0.702815
MX1	0.726815	7.77169	4.00274	0.000114459	0.00072082	0.702756
SYTL2	-1.05196	8.47075	-4.00267	0.000114487	0.00072082	0.702523
FLNA	0.898472	9.7095	4.00162	0.00011493	0.000722609	0.698888
FLVCR2	-0.629563	8.27536	-4.00018	0.000115541	0.000726251	0.693898
XYLB	-0.610827	7.71382	-3.99822	0.000116378	0.000730701	0.687111
CDK14	0.980355	7.21493	3.99804	0.000116456	0.00073099	0.68648
PFN2	-0.881007	7.77642	-3.99403	0.000118187	0.000740216	0.672606
OVOL1	-0.682914	8.17447	-3.98824	0.000120729	0.000754267	0.65259
NOTCH3	0.606326	7.82647	3.98482	0.000122256	0.000761708	0.640776
FUCA1	-0.759898	10.0252	-3.98317	0.000123003	0.000765526	0.635044
AKT3	1.01501	7.00913	3.98279	0.000123173	0.000766372	0.633747
PRR16	0.643688	6.1034	3.9826	0.000123257	0.000766475	0.633106
PSAT1	0.964169	6.86429	3.98005	0.000124417	0.000772418	0.624301
HNF1B	-0.830942	8.04747	-3.9784	0.000125175	0.000776914	0.618587
CLIC2	0.920174	6.40514	3.97697	0.000125831	0.000779916	0.613677
STOM	1.06615	9.61699	3.97454	0.000126958	0.000786048	0.605289
DNAJC15	-0.645043	9.36561	-3.97424	0.000127098	0.000786314	0.604252
SH3BGRL2	-0.887683	9.95282	-3.97423	0.000127105	0.000786314	0.604202
FBLN5	0.753752	7.6609	3.97243	0.000127946	0.000791087	0.598002
IFNAR2	0.81413	7.70016	3.97168	0.000128297	0.000792823	0.59543
CXCR1	1.7962	6.55712	3.97031	0.000128941	0.000795938	0.590721
GNB4	0.810389	6.98766	3.97003	0.000129076	0.000796554	0.589738
CYP2S1	-0.883694	9.19227	-3.96984	0.000129163	0.000796874	0.589105
RBMS1P1	1.2467	6.90669	3.96709	0.000130474	0.000804088	0.579614
CEP128	0.834875	6.87654	3.96578	0.000131102	0.000807298	0.575103
CCL22	0.698326	7.19204	3.96532	0.00013132	0.00080835	0.573537
ME1	1.17889	9.15559	3.96527	0.000131344	0.00080835	0.573364
CYP7B1	0.95283	7.40197	3.96415	0.000131886	0.000810145	0.5695
ASS1	0.779707	9.97254	3.96333	0.000132281	0.000812136	0.566689
GUCY1A3	1.17435	6.89242	3.96215	0.000132854	0.000815217	0.562623
PRLR	-1.22801	7.15206	-3.95968	0.000134062	0.000821075	0.554118
CAPN9	-1.03021	7.21975	-3.95783	0.000134969	0.000826183	0.547783
PDGFRA	0.89183	8.2157	3.95646	0.000135647	0.000830109	0.543075
CATSPERB	1.3002	7.20798	3.9544	0.000136673	0.000835264	0.535993
PTPN3	-0.603187	8.10036	-3.95387	0.000136938	0.000836659	0.534172
UCP2	0.792452	9.19616	3.95173	0.000138012	0.000842054	0.52683
IRF1	0.761811	9.53704	3.95128	0.000138239	0.000842569	0.525286
RNU4ATAC	0.726019	8.92983	3.95022	0.000138779	0.000845544	0.521623
IRF4	1.21156	8.33222	3.9476	0.000140112	0.000852155	0.512643
CHST15	1.02419	8.02383	3.9463	0.000140777	0.00085597	0.508195
IGKV2D-26	2.0017	9.46198	3.94487	0.000141513	0.000859522	0.503299
DMBT1	2.03264	10.5613	3.94236	0.000142816	0.000866745	0.494684
PNPLA4	-0.640131	7.96283	-3.93828	0.000144956	0.000877855	0.480715
LILRB1	0.849155	7.52774	3.93684	0.000145718	0.000881669	0.47579
DOCK2	1.04082	7.85516	3.93581	0.000146268	0.000884617	0.472256
CXCL9	1.66333	6.99555	3.93498	0.000146712	0.000886362	0.469405
HIST1H4L	0.641953	9.22344	3.93407	0.000147198	0.000889057	0.466304
NCF2	1.3931	7.43374	3.93267	0.000147952	0.000892904	0.461501
AIM2	1.1038	6.08355	3.92776	0.000150617	0.000906579	0.444735
RNU5F-1	0.827869	4.64163	3.92643	0.000151351	0.000909994	0.440173
SEC11C	0.594475	8.34025	3.9228	0.000153359	0.00091991	0.427799
ZNF385D	0.814805	6.04158	3.92255	0.000153502	0.000920528	0.42692
ANKRD20A11P	-0.674783	5.10702	-3.92124	0.000154236	0.000924683	0.422444
GPR124	0.665131	7.85017	3.92102	0.000154354	0.000925149	0.421724
HSPA13	0.792559	7.8139	3.92001	0.000154923	0.000928311	0.418272
LCP1	1.24519	9.6366	3.9196	0.000155154	0.000929453	0.41687
COL5A2	0.984651	7.10737	3.9189	0.000155549	0.000931323	0.414488
ARRDC4	-0.681124	8.9373	-3.91474	0.000157916	0.000942923	0.400305
PIWIL4	-0.581347	6.97353	-3.91373	0.0001585	0.000945504	0.396843
CD28	0.752144	6.22864	3.90876	0.000161385	0.000959943	0.379909
IGKV2D-18	1.06212	7.68384	3.90654	0.000162688	0.000966425	0.372364
TJP3	-0.685897	9.95977	-3.90641	0.000162763	0.00096662	0.37193
PDCD1LG2	1.0322	6.79052	3.90564	0.00016322	0.00096908	0.369299
SRD5A3	0.888238	9.45463	3.90348	0.000164503	0.000975929	0.361953
NRG1	1.11045	7.58894	3.90134	0.000165782	0.000982039	0.354685
TGFB2	0.795978	6.18526	3.89994	0.000166627	0.000985698	0.349914
GNG11	0.866744	7.38456	3.89585	0.000169115	0.000998598	0.336005
TNF	0.615881	6.65519	3.89366	0.000170458	0.00100574	0.328586
CCL18	1.78944	8.49901	3.89339	0.000170624	0.00100606	0.327671
CORO1A	1.01998	9.05318	3.89297	0.000170882	0.00100693	0.326254
IGHV5-78	0.838337	7.71669	3.88914	0.00017327	0.00101863	0.313232
TIFA	0.703589	6.70027	3.88673	0.000174783	0.00102646	0.305076
ERBB3	-0.888793	9.20029	-3.88472	0.000176057	0.00103264	0.298267
IL2RA	1.14066	7.20822	3.88428	0.000176335	0.00103397	0.296783
ABCC9	0.890406	5.8841	3.88294	0.000177197	0.00103795	0.292213
CASP10	0.672393	8.02954	3.8817	0.000177989	0.00104205	0.288028
KCNAB2	0.590618	7.457	3.87706	0.000180997	0.00105776	0.272308
CSF3R	1.52511	7.22905	3.87335	0.000183432	0.00107116	0.259779
PRKAR2B	0.600448	8.01909	3.86969	0.000185867	0.00108399	0.247411
SULF1	1.03881	7.54116	3.8691	0.000186268	0.00108604	0.245393
CD109	0.939893	5.96744	3.86711	0.000187603	0.00109327	0.238695
MPDZ	0.729807	6.30041	3.86694	0.00018772	0.00109367	0.23811
DQX1	-0.772282	7.405	-3.8665	0.000188017	0.00109512	0.236628
SERINC5	-0.634137	9.84478	-3.86607	0.000188306	0.00109634	0.235186
SAA2	1.13211	6.59285	3.86582	0.000188481	0.00109698	0.234316
ICAM3	0.723424	8.54249	3.86075	0.000191948	0.00111402	0.217226
TMEM119	0.629834	7.6043	3.85972	0.000192663	0.00111731	0.213744
TRABD2A	-0.773673	8.69754	-3.85904	0.000193132	0.00111974	0.211463
GSTA1	-0.795733	6.12626	-3.85854	0.00019348	0.0011209	0.209777
MXRA5P1	0.648089	6.32799	3.85819	0.000193729	0.00112177	0.208571
RNF157	-0.848893	7.92626	-3.8579	0.000193928	0.00112206	0.207611
ANGPTL4	1.05727	7.56031	3.85496	0.000195988	0.00113197	0.197704
SLC25A37	0.701499	8.48486	3.8519	0.000198158	0.00114246	0.187384
IGHV3OR15-7	1.16963	6.29592	3.85106	0.000198754	0.00114561	0.184567
PMAIP1	0.701414	7.12865	3.85074	0.000198983	0.00114635	0.183488
COL14A1	0.868463	7.4739	3.85023	0.000199352	0.00114818	0.181752
GPR155	0.630291	6.83336	3.84699	0.00020168	0.00115807	0.170871
PNP	0.580866	9.17632	3.84572	0.000202603	0.00116278	0.166592
ZNF704	-0.919344	7.13191	-3.84412	0.000203769	0.00116858	0.161217
HNF4A	-0.801372	9.74311	-3.84397	0.000203881	0.00116893	0.160701
S100A4	0.617405	7.4482	3.84122	0.000205902	0.00118022	0.151459
ENTPD8	-0.725753	8.51944	-3.83949	0.000207181	0.00118606	0.145658
SPP1	1.8221	7.55683	3.83931	0.000207313	0.00118612	0.145058
TMEM163	0.830221	6.43636	3.83851	0.00020791	0.00118873	0.142367
SPI1	0.647245	8.39125	3.83617	0.00020966	0.00119813	0.134514
LOC101927628	0.823858	9.42262	3.83513	0.000210443	0.0012014	0.131019
LTBP2	0.646761	7.44884	3.83069	0.000213821	0.00121976	0.116103
RNVU1-18	0.58248	11.8298	3.83031	0.000214111	0.0012208	0.114832
CPVL	0.609625	6.67144	3.82362	0.000219299	0.0012432	0.0924102
AGPAT9	-0.717802	8.44268	-3.82082	0.0002215	0.00125318	0.0830572
ALOX5	0.954588	8.61207	3.82048	0.000221772	0.00125441	0.0819061
AGT	0.839595	7.14457	3.82033	0.000221887	0.00125475	0.0814191
IKZF3	0.999182	7.60579	3.81683	0.000224681	0.00126928	0.0697045
GLT8D2	1.01477	7.16757	3.81404	0.000226932	0.0012804	0.0603691
CECR1	0.945745	7.83997	3.81385	0.000227086	0.00128063	0.0597349
SNORD34	0.750138	7.47076	3.81293	0.000227833	0.00128357	0.0566586
PTPRF	-0.74816	9.36638	-3.8121	0.000228507	0.00128705	0.0538906
PTPRCAP	0.654915	8.74122	3.80939	0.000230725	0.00129761	0.0448496
CD83	0.69056	7.01526	3.80932	0.000230786	0.00129764	0.0445993
KLK1	-0.851356	8.78158	-3.80863	0.000231351	0.00129996	0.042312
NCF4	0.918079	8.04513	3.80152	0.000237292	0.00132928	0.0185759
CCL4L2	1.42767	7.14783	3.79174	0.00024569	0.0013692	-0.0139725
FAM129A	0.889353	6.98272	3.79011	0.000247124	0.0013752	-0.0194167
CD86	0.941417	6.46013	3.78945	0.000247703	0.00137775	-0.0216098
TAGAP	1.24575	7.07432	3.7885	0.000248538	0.00138171	-0.0247574
IFIT3	0.830178	6.88764	3.78804	0.000248947	0.00138365	-0.0262964
FPR2	1.53833	5.98515	3.78742	0.000249491	0.00138633	-0.0283382
REG1B	3.0739	7.29596	3.78665	0.000250181	0.00138949	-0.0309233
SAA1	1.24004	6.37595	3.78178	0.000254542	0.00140991	-0.04709
CASD1	-0.608432	9.27447	-3.78054	0.000255665	0.00141475	-0.0512073
ANXA3	0.729069	9.31136	3.77941	0.000256694	0.00141941	-0.054967
CHRDL2	0.717092	6.90681	3.7786	0.000257428	0.00142174	-0.0576365
SLAMF7	1.36025	8.00167	3.77825	0.000257754	0.0014232	-0.0588225
DCN	1.29049	8.43658	3.77628	0.00025956	0.00143177	-0.0653522
MT-TY	-0.680313	9.7391	-3.77575	0.000260046	0.00143375	-0.0671002
SLC35D1	-0.631765	8.50421	-3.77502	0.000260723	0.00143714	-0.0695352
ERBB2	-0.677939	8.78979	-3.77466	0.000261052	0.0014386	-0.0707129
CKB	-1.50416	10.4449	-3.77355	0.000262078	0.00144251	-0.0743819
PCSK6	-0.64339	7.90654	-3.77327	0.000262346	0.00144271	-0.0753371
KCNJ15	1.28354	6.34768	3.77253	0.000263035	0.00144602	-0.0777911
C4BPA	1.8487	7.17148	3.77137	0.000264116	0.00145162	-0.0816281
FBXO32	-0.701384	8.45882	-3.76801	0.000267273	0.00146684	-0.0927386
PIK3R5	0.58847	7.13461	3.76335	0.000271723	0.00148874	-0.10818
LHFP	1.0358	9.03363	3.76288	0.000272176	0.00149086	-0.109738
IL18R1	0.680576	5.68275	3.76247	0.000272565	0.00149263	-0.111074
CEP170	1.02988	6.82766	3.76185	0.000273163	0.00149555	-0.113123
FAM20A	0.828316	6.21565	3.75973	0.000275221	0.00150572	-0.120139
HEPACAM2	-1.88531	8.33538	-3.75791	0.000276999	0.001514	-0.126162
ABCD2	0.633097	5.97898	3.75455	0.000280303	0.00152948	-0.137246
STC1	1.56496	6.87072	3.75431	0.00028054	0.0015303	-0.138037
SFMBT2	0.696071	7.84689	3.75427	0.000280589	0.0015303	-0.138198
SERPINB3	2.89502	6.77917	3.75387	0.000280982	0.00153171	-0.139506
GDA	-0.670543	8.23895	-3.74461	0.000290313	0.00157728	-0.170044
SELPLG	0.971998	8.26903	3.74445	0.00029048	0.0015778	-0.170579
SULT1B1	-0.838338	10.101	-3.7408	0.000294241	0.00159709	-0.182602
ANO9	-0.583705	9.42856	-3.73902	0.000296095	0.001606	-0.188472
FOXP2	-0.8639	5.65571	-3.73627	0.000298972	0.00161889	-0.197506
ACPP	0.853382	7.80595	3.73354	0.000301864	0.00163261	-0.206501
TRAF1	0.68912	6.3185	3.7331	0.000302327	0.00163472	-0.207933
TACSTD2	0.620434	6.34758	3.72475	0.000311341	0.00167708	-0.235378
OCLN	-0.975786	10.0179	-3.72418	0.000311958	0.0016796	-0.237227
CST7	0.786421	8.31248	3.72108	0.00031538	0.00169482	-0.247419
ADAMTS4	0.788092	6.58616	3.72081	0.000315677	0.0016956	-0.248296
FCGR2B	1.12839	8.14577	3.71774	0.000319096	0.00171073	-0.258357
PIK3AP1	0.600361	8.26696	3.71218	0.000325382	0.00174032	-0.276572
STAT4	0.642895	6.91839	3.7085	0.000329603	0.00175917	-0.288608
LOX	1.04245	7.27276	3.70238	0.00033674	0.00179179	-0.308607
DTHD1	0.584189	5.09118	3.6983	0.000341589	0.00181334	-0.321952
C3orf55	0.633443	5.72754	3.6947	0.000345907	0.0018309	-0.333676
PTGFR	0.653105	5.77827	3.6906	0.000350905	0.00185327	-0.347064
TMEM156	1.07595	5.96693	3.68892	0.000352966	0.00186199	-0.352528
RASSF2	1.09729	7.73073	3.68757	0.000354632	0.00186731	-0.356921
PAPPA	0.851093	6.58062	3.68724	0.000355038	0.00186901	-0.357989
TMEM71	0.96719	6.06526	3.68625	0.000356266	0.0018749	-0.361209
GALM	-0.631964	8.85174	-3.68621	0.000356322	0.0018749	-0.361357
RNY3P2	0.660805	6.27466	3.68532	0.000357433	0.00187988	-0.364262
TREM1	1.55374	6.78772	3.68456	0.000358383	0.00188269	-0.366738
LRRK2	1.18509	5.92429	3.68237	0.000361126	0.0018936	-0.373851
FPR1	1.35063	6.82116	3.68186	0.000361762	0.00189606	-0.375493
ERRFI1	0.822155	10.0612	3.67969	0.000364517	0.00190741	-0.38257
APBB1IP	0.871316	7.02504	3.67631	0.000368827	0.00192509	-0.393536
PDE3A	-0.832426	8.90079	-3.67602	0.0003692	0.00192659	-0.394478
HRASLS2	-1.07349	7.01105	-3.67406	0.000371739	0.00193762	-0.400871
DDR2	0.899407	7.50858	3.67189	0.000374546	0.00195046	-0.407888
FAM171B	0.831438	7.41333	3.67046	0.000376415	0.00195929	-0.41253
IKZF1	0.935729	7.06932	3.66998	0.000377052	0.0019617	-0.414105
KIAA0125	0.620105	7.81975	3.6661	0.000382172	0.00198522	-0.426684
HHLA2	-1.19961	10.3086	-3.66594	0.00038239	0.00198577	-0.427216
GPC6	0.699973	7.03451	3.66487	0.000383809	0.00199184	-0.43067
MMRN1	1.16079	7.0887	3.66291	0.00038643	0.00200228	-0.437015
IL1RL1	0.59036	5.56944	3.66166	0.000388113	0.00201004	-0.441066
SDK1	0.59942	7.24121	3.66086	0.000389193	0.00201472	-0.443658
CD68	0.580638	10.2538	3.6596	0.000390901	0.00202226	-0.44774
FAT4	0.704825	6.61379	3.65945	0.000391105	0.00202231	-0.448228
WDFY4	0.748152	7.1699	3.65538	0.000396666	0.00204502	-0.46139
VAV1	0.614865	7.73584	3.65199	0.000401366	0.00206409	-0.472369
LILRA1	0.857454	6.76077	3.65154	0.000401983	0.00206586	-0.473802
SDC2	0.597743	8.05332	3.65141	0.000402168	0.00206634	-0.474231
[truncated: 406 more rows]

## Sheet: C
logFC	AveExpr	t	P.Value	adj.P.Val	B
hsa-miR-196a	-0.880865	6.12095	-4.35259	0.000251837	0.0357609	0.576189
hsa-miR-125b	0.686923	9.88524	3.85389	0.00085298	0.0605616	-0.528902
hsa-miR-194	-0.695769	12.8943	-3.57199	0.00169003	0.0790578	-1.14677
hsa-miR-1972	1.53538	3.19048	3.45733	0.00222698	0.0790578	-1.39543
hsa-miR-29b-1-star	0.906442	2.48238	2.68586	0.0134556	0.31845	-2.99882
hsa-miR-194-star	-0.91	6.59667	-2.47562	0.0214232	0.33801	-3.40505
hsa-miR-3180-3p	0.670096	6.34857	2.18855	0.0394634	0.400272	-3.92988

## Sheet: D
logFC	AveExpr	t	P.Value	adj.P.Val	B
KRT12	-1.55787	5.77335	-12.8713	9.79242e-12	2.28203e-07	16.4094
MT-TW	-3.16305	7.19495	-11.4319	9.66293e-11	1.12593e-06	14.3861
ZRANB2	-1.04712	8.5158	-10.794	2.8528e-10	2.21606e-06	13.4097
LINC00893	-1.15567	5.88754	-10.5455	4.40296e-10	2.56516e-06	13.0152
MT-TE	-1.78383	10.9385	-10.4039	5.6553e-10	2.63582e-06	12.7868
CPT1B	-0.867142	7.02363	-10.2141	7.93961e-10	3.08374e-06	12.4764
ND2	-1.86574	9.80311	-10.0403	1.08726e-09	3.61965e-06	12.1878
ANKRD49	-0.619525	6.7435	-9.59815	2.45936e-09	6.10942e-06	11.4348
ANO9	-0.925999	9.04829	-9.53098	2.78989e-09	6.10942e-06	11.318
NADSYN1	-0.735837	8.57211	-9.51339	2.88378e-09	6.10942e-06	11.2873
LOC100653296	-0.837866	7.47212	-9.27143	4.56529e-09	8.1838e-06	10.8607
NEIL1	-0.861109	6.54903	-9.08116	6.58576e-09	1.09625e-05	10.5192
MT-TS1	-1.90472	9.11404	-8.94494	8.58549e-09	1.20865e-05	10.2716
ACYP1	-0.77111	6.1179	-8.90405	9.30117e-09	1.20865e-05	10.1967
FSIP2	-2.16778	6.00992	-8.90217	9.33562e-09	1.20865e-05	10.1932
SNHG12	-0.846608	7.02389	-8.72058	1.33572e-08	1.6383e-05	9.85769
PDZD3	-1.74728	6.74377	-8.6692	1.47936e-08	1.72375e-05	9.76187
ROCK2	-0.603659	9.7657	-8.58347	1.75557e-08	1.94818e-05	9.60111
HIST1H3E	-1.10025	6.03629	-8.41562	2.46145e-08	2.41094e-05	9.2832
LINC01089	-0.857194	6.4563	-8.41133	2.48294e-08	2.41094e-05	9.27501
FAM200B	-0.76639	5.40609	-8.379	2.65112e-08	2.47127e-05	9.21327
CCDC84	-0.622418	7.25108	-8.20186	3.80591e-08	3.21063e-05	8.87223
USP17L15	-0.915219	5.6803	-8.17371	4.03249e-08	3.21063e-05	8.81761
CENPT	-0.690503	6.89876	-8.16173	4.13315e-08	3.21063e-05	8.79432
ADCK5	-0.585694	7.30619	-8.0975	4.71859e-08	3.43631e-05	8.66912
APBB3	-0.673313	6.92425	-8.05792	5.12141e-08	3.58941e-05	8.59165
SF3B4	-0.753071	7.65206	-8.04556	5.25426e-08	3.58941e-05	8.56742
SNORA23	1.81028	10.9291	8.03319	5.39089e-08	3.58941e-05	8.54313
FAM184B	-0.670794	5.93407	-7.98301	5.98364e-08	3.87341e-05	8.44439
BDH2P1	-0.965838	7.10594	-7.94588	6.46514e-08	4.07199e-05	8.3711
ERVK13-1	-0.935848	6.98075	-7.80368	8.71076e-08	5.14562e-05	8.08847
SLMO2	-0.643601	9.11564	-7.7576	9.5999e-08	5.2027e-05	7.99624
ACADVL	-0.878882	9.87693	-7.72505	1.02839e-07	5.44675e-05	7.93089
CMAS	-0.679571	9.08469	-7.69433	1.09754e-07	5.68378e-05	7.86909
KCNG3	-0.744716	6.36731	-7.66752	1.16182e-07	5.88588e-05	7.81502
SPAG9	-0.581254	8.61255	-7.6148	1.29975e-07	6.31027e-05	7.70839
RNU2-2P	1.72199	9.8807	7.59303	1.36152e-07	6.4753e-05	7.66424
PILRB	-0.900727	7.25559	-7.54663	1.50348e-07	7.00741e-05	7.56991
AKR7L	-0.944952	6.46341	-7.53008	1.55772e-07	7.11785e-05	7.53619
TAT	-1.029	5.04371	-7.51231	1.6182e-07	7.25205e-05	7.49993
TSEN2	-0.63843	6.47967	-7.50338	1.64949e-07	7.25279e-05	7.48171
HOXA2	-1.31553	6.4518	-7.4765	1.74756e-07	7.5417e-05	7.42673
GORAB	-0.601853	7.02176	-7.44053	1.88821e-07	7.62197e-05	7.35302
OR4F4	-1.10121	4.00172	-7.43194	1.92349e-07	7.62197e-05	7.33539
MTMR11	-1.62308	8.62728	-7.43083	1.92812e-07	7.62197e-05	7.33309
MICU2	-0.761567	8.44815	-7.42298	1.96104e-07	7.62197e-05	7.31697
LOC100127951	-1.02397	4.52055	-7.42266	1.9624e-07	7.62197e-05	7.31631
ME3	-0.933582	7.55055	-7.38697	2.11963e-07	7.96754e-05	7.24287
ST5	0.612287	7.483	7.38694	2.11975e-07	7.96754e-05	7.24282
EPB41L3	-0.767362	8.15885	-7.37495	2.17545e-07	8.04558e-05	7.2181
MIER3	-1.513	9.56172	-7.33511	2.37153e-07	8.37364e-05	7.13584
PIGL	-0.619462	6.34757	-7.28227	2.65994e-07	8.98367e-05	7.02638
NAA40	-0.708023	7.52144	-7.26963	2.73416e-07	9.10242e-05	7.00013
RNU2-6P	0.675204	5.72404	7.22592	3.00753e-07	9.87147e-05	6.9092
RNY1P8	-0.773996	3.66329	-7.18458	3.29195e-07	0.000104849	6.82294
CREB3L1	0.931633	9.3237	7.17846	3.3364e-07	0.000104849	6.81013
CGN	-0.930195	8.11041	-7.16981	3.40021e-07	0.000104849	6.79204
HDHD3	-0.863155	8.39581	-7.16394	3.4442e-07	0.000104849	6.77977
SOD3	0.751017	7.31119	7.1462	3.58081e-07	0.000106984	6.74262
SMIM5	-0.70401	6.86506	-7.10866	3.88854e-07	0.000113273	6.66386
CDK5RAP3	-0.62942	6.87329	-7.09694	3.99006e-07	0.000114718	6.63923
CNST	-0.619718	7.1145	-7.08016	4.14026e-07	0.000115717	6.60392
RNU6-158P	0.70177	6.05956	7.0493	4.43171e-07	0.000121502	6.5389
ENGASE	-0.834036	7.21258	-7.03377	4.58627e-07	0.000124277	6.50612
FRMD1	-1.18277	6.54807	-7.02718	4.65353e-07	0.00012465	6.4922
CHPF	0.7027	7.82573	6.96329	5.36048e-07	0.000138801	6.35694
USP32P3	-0.78354	6.43399	-6.94309	5.60626e-07	0.000141447	6.31405
SNORD31	-0.774064	5.40664	-6.94001	5.64476e-07	0.000141447	6.3075
IFT74	-0.926718	6.84164	-6.92395	5.84977e-07	0.000143925	6.27336
RAVER2	-1.16336	9.76115	-6.91985	5.90336e-07	0.000143925	6.26464
LENG8	-0.609534	8.5753	-6.90298	6.1291e-07	0.000143925	6.22872
POLR2H	-0.593794	9.91673	-6.90288	6.13041e-07	0.000143925	6.22852
KIF16B	-0.702043	7.91377	-6.89525	6.2355e-07	0.000143925	6.21225
KTN1	-0.856135	8.82821	-6.89134	6.28994e-07	0.000143925	6.20393
AHCYL2	-0.81041	11.0758	-6.89066	6.2995e-07	0.000143925	6.20247
REXO1L1P	-0.653791	6.94536	-6.85755	6.78214e-07	0.000153448	6.1318
ABCD3	-0.854414	9.02786	-6.83128	7.19184e-07	0.000158112	6.07563
GRAMD3	-0.951965	8.56944	-6.82106	7.35811e-07	0.000158772	6.05374
HINFP	-0.699283	7.47818	-6.81065	7.53145e-07	0.000160076	6.03144
FABP1	-1.54864	9.92612	-6.80768	7.58176e-07	0.000160076	6.02506
DNAH7	-0.828485	4.84411	-6.80516	7.62462e-07	0.000160076	6.01966
SLC17A4	-2.46163	7.82546	-6.79865	7.73647e-07	0.000160974	6.00571
AP1AR	-0.71849	7.78136	-6.75908	8.45405e-07	0.000172992	5.92073
C9orf85	-0.744244	6.92936	-6.7581	8.47278e-07	0.000172992	5.91861
SLC51B	-1.67416	8.82244	-6.75225	8.58468e-07	0.000172992	5.90604
BAGE3	-0.715859	3.99913	-6.7469	8.68843e-07	0.000172992	5.89453
GTPBP2	-0.699548	8.67588	-6.7469	8.68852e-07	0.000172992	5.89452
SNORD36C	-0.825533	6.90154	-6.73474	8.92911e-07	0.000172992	5.86834
STK38	-0.706733	9.73723	-6.72943	9.03631e-07	0.000172992	5.8569
APOBEC3B	-2.21779	8.64357	-6.72481	9.13063e-07	0.000172992	5.84695
GMFB	-0.64293	8.02649	-6.66797	1.03776e-06	0.000188953	5.72422
TBC1D3B	-0.848304	7.01842	-6.66515	1.04438e-06	0.000188953	5.71812
SNX13	-0.698682	8.55419	-6.66117	1.05381e-06	0.000188953	5.7095
SCARNA1	1.5577	6.69994	6.64355	1.09658e-06	0.000193484	5.67136
AVIL	-1.26088	6.78457	-6.63042	1.12959e-06	0.000196251	5.64291
LY6G5B	-0.947036	6.59287	-6.62757	1.13688e-06	0.000196251	5.63674
TRIM3	-0.645253	6.82879	-6.61072	1.18106e-06	0.000202174	5.60017
LIAS	-0.792569	6.31028	-6.5853	1.25104e-06	0.000208729	5.54494
CROT	-1.41943	7.01645	-6.58189	1.26076e-06	0.000208729	5.53752
SLC16A1	-1.9467	7.73268	-6.56165	1.31996e-06	0.000214082	5.49349
ABCC3	-0.659471	9.33878	-6.56069	1.32286e-06	0.000214082	5.49139
HOXA9	-0.887851	7.77612	-6.55103	1.35219e-06	0.000214928	5.47034
RND3	-0.625866	8.22932	-6.54946	1.35702e-06	0.000214928	5.46692
RNU6-1314P	0.604315	5.01807	6.54053	1.38481e-06	0.000215107	5.44746
LPIN3	-0.74109	6.67009	-6.53528	1.40143e-06	0.000215107	5.43601
B3GNT9	0.599983	6.56568	6.53242	1.41057e-06	0.000215107	5.42977
PDE8A	-0.871113	9.32457	-6.53189	1.41226e-06	0.000215107	5.42862
C2CD5	-0.677479	8.77159	-6.52739	1.4268e-06	0.000215246	5.41879
LOC648987	0.809241	5.75929	6.52589	1.43165e-06	0.000215246	5.41554
SCML1	-0.951532	6.44347	-6.51928	1.45336e-06	0.000217109	5.40109
ZNF845	-0.678206	7.43691	-6.51563	1.46547e-06	0.000217524	5.39313
MAST2	-0.859038	9.08514	-6.50874	1.48862e-06	0.000219524	5.37808
MS4A12	-2.01325	11.023	-6.50604	1.49778e-06	0.000219524	5.37219
DNAH1	-0.705545	6.39539	-6.4988	1.52268e-06	0.000220401	5.35636
TBC1D3F	-0.821428	6.88449	-6.4948	1.53662e-06	0.000221046	5.34761
MRPS36	-0.655662	7.0707	-6.46177	1.65678e-06	0.000231517	5.27532
ETFDH	-1.39037	8.12827	-6.45558	1.68033e-06	0.000233086	5.26177
HEATR5A	-0.710076	8.22724	-6.44267	1.73061e-06	0.000237697	5.23346
ZNF439	-0.791234	5.55852	-6.44105	1.73702e-06	0.000237697	5.22991
TRIM51CP	-0.736914	3.97424	-6.4311	1.77698e-06	0.00024076	5.20807
OR14I1	-0.659235	5.24265	-6.4273	1.79246e-06	0.000241454	5.19974
GRAMD4	-0.782512	8.52782	-6.4203	1.82139e-06	0.000243941	5.18436
OSBPL11	-0.638806	7.21047	-6.4158	1.84025e-06	0.000244894	5.17447
PHLPP2	-1.8467	8.91342	-6.4136	1.84952e-06	0.000244894	5.16963
SGK2	-1.51627	8.43203	-6.40707	1.87736e-06	0.000245786	5.15529
NCALD	0.637144	5.83683	6.40455	1.8882e-06	0.000245824	5.14976
HSD17B3	-0.844263	5.02646	-6.39278	1.93978e-06	0.000251137	5.12387
RNU2-1	0.829778	11.2139	6.3887	1.958e-06	0.000252096	5.11488
SEPN1	0.612014	9.09436	6.37629	2.01445e-06	0.000255134	5.08758
ESAM	0.602902	6.16071	6.3654	2.06541e-06	0.000260174	5.06358
SLC4A10	-1.26379	5.44656	-6.35777	2.10183e-06	0.000263339	5.04678
MIR192	-1.49239	7.73268	-6.33732	2.20284e-06	0.000273306	5.00168
LGALS3	-0.72327	10.3531	-6.33693	2.20484e-06	0.000273306	5.00081
CDC14A	-1.26141	7.72593	-6.32306	2.27624e-06	0.000280664	4.97018
TMEM171	-1.15011	8.69077	-6.31638	2.31144e-06	0.000283504	4.95543
SPATA25	-0.634701	6.14941	-6.30662	2.36391e-06	0.000288421	4.93386
MPP7	-1.0531	8.00614	-6.29727	2.41537e-06	0.00029242	4.91316
GCOM1	-1.06365	7.00256	-6.29329	2.43757e-06	0.000292809	4.90437
GLS	-0.693047	8.28502	-6.28781	2.46849e-06	0.000295004	4.89225
SLC6A14	4.72117	7.55567	6.28239	2.4995e-06	0.000297186	4.88025
DAPK2	-0.813396	8.02945	-6.27425	2.54681e-06	0.00030038	4.86223
SSTR2	-0.657925	6.39153	-6.26737	2.58754e-06	0.000303015	4.84698
MSI2	0.599892	7.40534	6.25211	2.68022e-06	0.0003123	4.81314
MIER1	-0.650659	8.71959	-6.2387	2.76445e-06	0.000318507	4.78339
TMEM173	0.968452	8.42105	6.23646	2.77878e-06	0.000318507	4.77842
LINC00483	-1.41945	7.99121	-6.2244	2.85724e-06	0.000320121	4.75165
NT5C2	-0.664873	9.5814	-6.21528	2.91815e-06	0.000324057	4.73137
KRT20	-0.80319	11.6171	-6.21101	2.94709e-06	0.000325493	4.72188
ADAT2	-0.629345	7.02832	-6.20464	2.99077e-06	0.000327216	4.70773
CPT1A	-1.11117	9.28255	-6.20251	3.00554e-06	0.000327294	4.70299
PHYKPL	-0.603441	8.39341	-6.19547	3.05491e-06	0.000331124	4.68732
CAPN3	-0.581864	6.96471	-6.16432	3.28341e-06	0.000346229	4.61795
CCNL2	-0.730741	7.40298	-6.16212	3.30018e-06	0.00034643	4.61305
CACNB3	-0.614463	8.12743	-6.15167	3.38107e-06	0.000349398	4.58976
PDXDC2P	-1.09249	8.73726	-6.14598	3.426e-06	0.000350174	4.57706
MPP5	-0.767724	7.89947	-6.13508	3.51371e-06	0.000357569	4.55274
ME2	-0.598198	9.44989	-6.13309	3.52999e-06	0.000357665	4.54829
YBX2	-0.650298	8.44688	-6.12717	3.57881e-06	0.000359485	4.53508
SLC25A20	-1.00598	7.89483	-6.12461	3.60014e-06	0.000360076	4.52936
CD2AP	-0.717333	10.4861	-6.11681	3.66597e-06	0.000365093	4.51193
RNPC3	-0.792702	7.61265	-6.11268	3.7013e-06	0.000365488	4.5027
GBA2	-0.680775	9.02688	-6.10648	3.75499e-06	0.000367674	4.48885
CX3CL1	0.774072	6.8795	6.09017	3.90013e-06	0.000378703	4.45236
SLC38A4	-2.5559	5.57364	-6.08567	3.94117e-06	0.0003811	4.44229
C5orf30	-0.915278	8.5095	-6.07576	4.0331e-06	0.000388206	4.4201
ABHD3	-0.857164	9.38504	-6.07418	4.04798e-06	0.000388206	4.41656
LOC100506730	-0.816831	6.68287	-6.05378	4.24487e-06	0.000400885	4.37086
TMEM56	-1.43847	8.76537	-6.05336	4.24899e-06	0.000400885	4.36992
IFT88	-0.582605	5.84418	-6.04981	4.28435e-06	0.00040259	4.36195
SNX30	-0.97008	8.32325	-6.03847	4.39905e-06	0.0004052	4.33652
EAPP	-0.727349	7.9244	-6.03383	4.44689e-06	0.000407994	4.32611
CD82	1.04789	8.40127	6.0293	4.49418e-06	0.000410715	4.31593
SULT1A2	-1.6301	8.03858	-6.01789	4.61544e-06	0.000418515	4.29031
PP12719	-0.934831	6.13651	-6.0121	4.67827e-06	0.000419509	4.27729
TDRD7	-0.609156	7.54774	-6.01026	4.69841e-06	0.000419509	4.27316
ACOX1	-1.2651	9.81532	-5.99496	4.86935e-06	0.000431428	4.23876
ZNF252P	-0.640911	6.82633	-5.99186	4.90475e-06	0.000431428	4.23179
KRCC1	-0.736166	8.66567	-5.99175	4.90596e-06	0.000431428	4.23155
ATF4	-0.753749	8.81427	-5.98543	4.97893e-06	0.000431551	4.21734
PPARG	-1.2468	9.17567	-5.98109	5.02972e-06	0.000433559	4.20757
LRRC1	-0.669263	8.26306	-5.98006	5.04181e-06	0.000433559	4.20526
TWSG1	0.977383	7.74879	5.97587	5.09152e-06	0.000436223	4.19581
CELSR1	0.743032	6.5937	5.95483	5.34845e-06	0.000452828	4.14842
MGAT4A	-0.774182	9.4453	-5.94599	5.46026e-06	0.000452828	4.1285
IQGAP2	-0.901042	9.76347	-5.94573	5.4636e-06	0.000452828	4.12791
NAAA	-1.06004	9.51483	-5.94361	5.49083e-06	0.000452828	4.12312
RNU6-848P	-0.70723	4.23083	-5.94297	5.49907e-06	0.000452828	4.12168
BPNT1	-0.840787	7.71527	-5.93808	5.5624e-06	0.000454399	4.11066
MKKS	-0.773124	6.48389	-5.93699	5.57665e-06	0.000454399	4.10819
ARHGAP42	-0.879939	8.03115	-5.93389	5.61718e-06	0.000454523	4.10122
CSTF2	-0.585688	7.21092	-5.93184	5.64423e-06	0.000455132	4.0966
MPC1	-0.584485	9.82006	-5.91923	5.81363e-06	0.000461352	4.06812
SNORA45A	1.29049	10.9361	5.91729	5.84015e-06	0.000461352	4.06374
FGFR2	-1.34132	7.28862	-5.9148	5.87437e-06	0.000462488	4.05812
MOGAT3	-0.950603	7.68679	-5.90342	6.03323e-06	0.000470228	4.03242
IRS1	1.38601	7.09828	5.89986	6.08391e-06	0.000472468	4.02437
SRSF5	-0.696898	8.46901	-5.89856	6.10251e-06	0.000472468	4.02143
SLC30A10	-2.56614	7.90853	-5.89388	6.16985e-06	0.0004761	4.01086
S100P	1.58611	8.37832	5.89103	6.21128e-06	0.000476332	4.00442
ZZEF1	-0.620701	8.78191	-5.89086	6.21374e-06	0.000476332	4.00403
DGKD	-0.678437	9.09573	-5.8866	6.27626e-06	0.000478462	3.99439
HOXA5	-0.976014	7.09289	-5.8803	6.36983e-06	0.000480978	3.98014
MIR186	-1.38698	5.42946	-5.87978	6.37754e-06	0.000480978	3.97898
ANO6	1.33084	8.09988	5.87655	6.42615e-06	0.000481528	3.97167
UGP2	-0.871817	9.80635	-5.87244	6.48853e-06	0.000483095	3.96236
HADHB	-0.596304	9.274	-5.86872	6.54552e-06	0.000485786	3.95394
LRRFIP2	-0.610915	8.50703	-5.86178	6.6531e-06	0.000486485	3.93824
UBE2A	-0.646955	9.08132	-5.85799	6.71273e-06	0.000488855	3.92965
SLC27A2	-0.895256	8.96827	-5.85169	6.81284e-06	0.000492959	3.91539
AQP11	-0.980595	6.6675	-5.83808	7.03448e-06	0.000504405	3.88456
FAM213A	-1.03902	8.0023	-5.82966	7.17531e-06	0.000508247	3.86547
CCDC112	-0.868276	5.79026	-5.81801	7.37496e-06	0.000516697	3.83903
PS1TP4	-0.699173	6.51622	-5.81728	7.3877e-06	0.000516697	3.83737
CDC42BPA	-0.757192	8.24708	-5.81626	7.40546e-06	0.000516697	3.83506
RNU1-106P	0.735163	6.01259	5.80852	7.54166e-06	0.000523068	3.81751
RAB9A	-0.588913	8.11821	-5.80478	7.60839e-06	0.00052613	3.80902
EIF5A2	0.81551	5.93852	5.8031	7.63868e-06	0.000526662	3.80519
ABCC13	-0.979009	5.27245	-5.79871	7.71818e-06	0.000530377	3.79522
ATP1B3	-0.592304	9.60415	-5.79761	7.73808e-06	0.000530377	3.79274
PAPSS2	-0.600849	11.0761	-5.79308	7.82133e-06	0.000533632	3.78243
DDAH2	-0.89609	7.89499	-5.78836	7.90883e-06	0.000535868	3.77172
RNVU1-15	0.973527	6.40362	5.78568	7.95902e-06	0.000536061	3.76562
PYROXD1	-0.699033	8.53104	-5.78163	8.03528e-06	0.000538087	3.75644
ABCB11	-0.942604	4.90664	-5.77991	8.068e-06	0.00053873	3.75252
PDIA5	0.618984	7.86036	5.77704	8.12291e-06	0.000539519	3.74599
JAM2	0.8004	7.51868	5.77482	8.16553e-06	0.000539519	3.74095
TBC1D3P2	-0.612012	6.37009	-5.77388	8.18358e-06	0.000539519	3.73882
ACADM	-0.899614	9.56277	-5.77326	8.19558e-06	0.000539519	3.73741
PPAP2A	-0.841858	9.11696	-5.77118	8.23597e-06	0.000540241	3.73267
PAM	0.834222	7.73087	5.77031	8.25291e-06	0.000540241	3.73069
EPHB4	0.613366	8.01722	5.76038	8.4486e-06	0.00054843	3.70812
ENPP1	-1.53941	8.06227	-5.75783	8.4997e-06	0.000550214	3.70231
RNU4ATAC	1.01711	8.42169	5.74644	8.7316e-06	0.00056366	3.67638
CREB3L2	1.06784	8.82527	5.74065	8.85189e-06	0.000568276	3.6632
SLC35G1	-1.4662	7.46919	-5.73516	8.96734e-06	0.000574107	3.65071
FGFR3	-0.939511	7.66816	-5.73284	9.01684e-06	0.000575694	3.64541
VPS13A	-0.893492	7.53858	-5.72557	9.17313e-06	0.000579324	3.62885
IP6K2	-0.685776	7.59348	-5.72165	9.25867e-06	0.000582523	3.61991
PLS3	1.01353	7.1351	5.71954	9.30495e-06	0.000582523	3.61511
NAP1L2	-0.689856	4.40116	-5.7188	9.32114e-06	0.000582523	3.61343
PKIB	-1.38064	7.52292	-5.71637	9.37491e-06	0.000582594	3.60789
RN7SL78P	-0.760652	4.84495	-5.71518	9.40147e-06	0.000582691	3.60516
PUS10	-0.875436	6.18173	-5.71339	9.44122e-06	0.000583602	3.6011
ZNF217	-0.591737	8.78747	-5.70304	9.67553e-06	0.000594194	3.57748
CLIP3	0.597645	7.2038	5.69569	9.84521e-06	0.000602186	3.56073
HIBCH	-0.877156	7.40718	-5.67389	1.03672e-05	0.000629157	3.51096
LPHN2	1.52986	7.093	5.65751	1.07777e-05	0.000649	3.47354
ATP2B1	-0.716912	8.96878	-5.65555	1.08278e-05	0.000650337	3.46907
BACE2	1.09083	9.31409	5.6543	1.086e-05	0.000650597	3.4662
COX5B	-0.59223	10.3518	-5.6508	1.09507e-05	0.000652674	3.45819
AHSA2	-0.925774	6.69996	-5.62696	1.15882e-05	0.000680231	3.40367
HADHA	-0.60607	9.96224	-5.6257	1.1623e-05	0.000680367	3.40078
LIX1L	0.63826	8.00792	5.61721	1.18597e-05	0.000689225	3.38135
FAM46C	0.903328	8.99298	5.61078	1.20423e-05	0.000696656	3.36663
RAB17	-0.733829	6.95112	-5.60824	1.21151e-05	0.000696656	3.36082
SUGCT	-1.14467	5.85263	-5.60796	1.21231e-05	0.000696656	3.36018
RAB6B	-0.708053	6.10663	-5.60742	1.21388e-05	0.000696656	3.35893
FAM156B	-0.708721	6.71042	-5.60645	1.2167e-05	0.000696656	3.3567
DOCK1	-0.679515	8.32143	-5.59908	1.23817e-05	0.000705961	3.33984
TMEM92	0.920768	7.02869	5.58375	1.28416e-05	0.000722902	3.3047
ABCG2	-3.33459	7.44338	-5.57707	1.30473e-05	0.000729492	3.28938
SLC5A12	-0.679873	5.07549	-5.57493	1.31139e-05	0.000729492	3.28448
SNORA80E	1.19493	9.81705	5.57387	1.31472e-05	0.000729492	3.28203
BTBD3	-0.831683	8.3377	-5.57313	1.31702e-05	0.000729492	3.28035
OR11K1P	-0.615201	3.98058	-5.56919	1.32944e-05	0.000734155	3.2713
MGST3	-0.634084	10.4496	-5.56532	1.34175e-05	0.000738573	3.26242
RSRP1	-1.07983	7.20639	-5.56369	1.34695e-05	0.000738573	3.25869
CIPC	-0.991879	7.96878	-5.55041	1.39023e-05	0.000755196	3.22821
CD9	-0.596692	10.5493	-5.54797	1.39834e-05	0.000757432	3.2226
GOLIM4	-0.6071	10.3191	-5.54721	1.40087e-05	0.000757432	3.22086
CA12	-1.06307	11.1549	-5.54583	1.4055e-05	0.000757432	3.21768
HIGD1AP1	-0.662044	9.76963	-5.54405	1.41147e-05	0.000757903	3.21359
MAPRE3	-1.12488	7.15036	-5.52643	1.472e-05	0.000783184	3.17313
MUC5B	1.49317	9.71515	5.51687	1.50595e-05	0.000797607	3.15115
PDE6A	-1.44822	5.63523	-5.50992	1.53115e-05	0.000807281	3.13516
HERC2P2	-0.759646	7.85523	-5.50729	1.54079e-05	0.00081053	3.12911
NR1I2	-0.969377	6.92195	-5.50141	1.56252e-05	0.000820114	3.11561
CYP4F12	-1.26959	7.20449	-5.49168	1.59926e-05	0.000835634	3.09321
SCARNA4	1.23428	6.41566	5.48738	1.61576e-05	0.000838624	3.08331
HOXA3	-0.822731	6.60749	-5.47138	1.6787e-05	0.00085278	3.04648
GCNT2	-1.2221	5.7719	-5.46954	1.68611e-05	0.000854197	3.04224
FOXA2	0.690302	7.69201	5.46599	1.70048e-05	0.000858911	3.03406
NDUFA5	-0.624055	7.11408	-5.46188	1.71726e-05	0.000862481	3.02459
NIPSNAP3A	-0.675566	8.21922	-5.45895	1.72933e-05	0.000866672	3.01784
FAHD1	-0.736861	7.36929	-5.44854	1.77293e-05	0.00088472	2.99384
SFXN1	-0.953455	8.70711	-5.43887	1.81442e-05	0.00090156	2.97155
SNORA14B	0.943	7.23531	5.43395	1.83587e-05	0.000906394	2.96022
NRN1	0.894635	6.41775	5.4321	1.84405e-05	0.000906619	2.95593
TCP11L1	-0.7298	6.95457	-5.43108	1.84851e-05	0.0009069	2.9536
SUCLG1	-0.746986	9.09795	-5.42942	1.85591e-05	0.000908616	2.94975
PLCD1	-1.41127	8.27553	-5.42723	1.86565e-05	0.000909738	2.94471
VIL1	-0.809173	10.0604	-5.42628	1.86991e-05	0.000909738	2.94251
APCDD1	0.976606	7.5723	5.42379	1.88107e-05	0.00091326	2.93678
LEFTY1	0.690236	8.45312	5.40152	1.98412e-05	0.000947584	2.88536
CPT2	-0.753702	7.87879	-5.39926	1.99485e-05	0.000948179	2.88017
STXBP1	0.872796	7.93667	5.38417	2.06831e-05	0.000966417	2.84531
SERF1B	-0.907027	7.10309	-5.38382	2.07006e-05	0.000966417	2.8445
HOXA7	-0.907661	8.32433	-5.37837	2.09731e-05	0.000970986	2.83189
RNU6-816P	-0.660226	4.07777	-5.37784	2.09995e-05	0.000970986	2.83068
ABHD5	-0.741302	8.35099	-5.37625	2.108e-05	0.000971344	2.82699
UGDH	-0.764539	11.0847	-5.37479	2.11537e-05	0.00097149	2.82362
OR11H1	-0.93494	4.67629	-5.37432	2.11773e-05	0.00097149	2.82255
SRI	-0.632616	11.0633	-5.3721	2.12905e-05	0.000974102	2.81741
PBLD	-1.7075	8.06281	-5.36419	2.16986e-05	0.000987626	2.79911
TRIM36	-1.03949	6.24479	-5.36152	2.18379e-05	0.000990859	2.79294
PFKFB2	-0.771922	8.15937	-5.3612	2.18547e-05	0.000990859	2.7922
ARSJ	0.986369	6.52578	5.35521	2.21709e-05	0.00100325	2.77836
MRPS25	-0.713005	7.62851	-5.34712	2.26055e-05	0.00102074	2.75965
PPP1R14C	-0.747812	6.97074	-5.34558	2.2689e-05	0.00102074	2.75609
RBKS	-0.781933	6.32245	-5.3412	2.29292e-05	0.00102758	2.74594
BTG2	0.891856	8.67182	5.33225	2.34273e-05	0.00104193	2.72523
MAP3K6	0.638213	7.3208	5.331	2.34977e-05	0.00104209	2.72233
ROR2	0.614294	6.31665	5.32562	2.38033e-05	0.00104983	2.70988
PGM2L1	0.73677	6.93444	5.32001	2.41261e-05	0.00105882	2.6969
DQX1	-1.26506	7.07035	-5.31886	2.41926e-05	0.00105975	2.69424
ZNF789	-0.594298	6.54428	-5.31695	2.43044e-05	0.00106265	2.6898
C5orf63	-0.931615	6.96302	-5.31405	2.44742e-05	0.00106408	2.68309
ZNF33B	-0.596095	6.55925	-5.30735	2.48715e-05	0.00107734	2.66756
ZNF823	-0.590932	6.46795	-5.30327	2.51165e-05	0.00108593	2.65812
SLC35D2	-0.665687	9.47545	-5.30112	2.52466e-05	0.00108953	2.65314
DAPP1	1.73526	6.42452	5.29882	2.53864e-05	0.00109354	2.64781
APPL2	-0.987243	9.26999	-5.2932	2.57319e-05	0.00110162	2.63478
LOC642533	-1.03562	7.85927	-5.29008	2.59256e-05	0.00110205	2.62755
AKR1B10	-1.64804	8.67693	-5.28984	2.59409e-05	0.00110205	2.62699
AGRN	0.617693	7.54852	5.28949	2.59622e-05	0.00110205	2.62619
CRTC3	0.712022	8.37248	5.28762	2.60796e-05	0.00110502	2.62185
HPGD	-1.38461	10.2323	-5.28092	2.65033e-05	0.00111522	2.60631
PLEKHG6	-1.061	7.71573	-5.28048	2.65311e-05	0.00111522	2.6053
TUBAL3	-1.50742	6.70114	-5.28028	2.65443e-05	0.00111522	2.60482
MAGI1	-0.690058	8.0497	-5.27923	2.66112e-05	0.00111522	2.6024
MT-TY	-0.971331	9.92669	-5.27705	2.67514e-05	0.00111723	2.59733
HOXA6	-1.26355	7.88537	-5.27503	2.68813e-05	0.00111804	2.59266
PLSCR3	0.759945	6.86521	5.27398	2.69497e-05	0.00111804	2.59021
TTC28	0.67586	6.17359	5.26593	2.74765e-05	0.0011333	2.57155
VTRNA1-3	0.830309	5.44513	5.26125	2.77877e-05	0.00114411	2.5607
SHISA5	0.697542	9.85858	5.25967	2.7894e-05	0.0011464	2.55702
SLC20A2	-1.00452	8.77363	-5.25895	2.79418e-05	0.0011464	2.55537
ALDH18A1	-0.770836	8.91895	-5.25451	2.82422e-05	0.00115669	2.54506
SLC22A18AS	-0.96186	6.6478	-5.25275	2.83621e-05	0.00115956	2.54098
RNVU1-18	0.6573	11.3714	5.24717	2.87461e-05	0.0011732	2.52802
CNTN4	-1.20662	5.54107	-5.24346	2.9004e-05	0.00117395	2.51941
HMGN5	-0.740292	5.25681	-5.24341	2.90072e-05	0.00117395	2.5193
ARID5B	0.681175	8.082	5.2433	2.90152e-05	0.00117395	2.51903
RNU6-1158P	0.682753	6.79672	5.24153	2.91388e-05	0.00117395	2.51494
SLC27A4	-0.763651	8.53885	-5.24153	2.91394e-05	0.00117395	2.51492
IGBP1P1	-0.666825	4.64068	-5.2343	2.96512e-05	0.00118745	2.49814
WDR78	-1.31014	6.37702	-5.23124	2.98704e-05	0.001194	2.49104
LMTK2	-0.623481	8.95988	-5.22576	3.02674e-05	0.00120367	2.47831
PHF7	-0.642225	6.46294	-5.22285	3.04807e-05	0.00120539	2.47154
RHOU	-1.06233	9.10579	-5.22161	3.05715e-05	0.00120539	2.46867
FAM95B1	-0.689933	5.4581	-5.22094	3.0621e-05	0.00120539	2.46711
CYCS	-0.613207	8.94388	-5.21848	3.0803e-05	0.00120552	2.46141
AQP3	0.768495	7.47386	5.21739	3.08841e-05	0.00120557	2.45887
SMARCA1	0.683647	5.90011	5.21388	3.1147e-05	0.00121177	2.4507
NRXN3	0.925204	5.93872	5.21097	3.13662e-05	0.0012135	2.44394
DMTF1	-0.644125	7.88199	-5.21033	3.14145e-05	0.0012135	2.44246
NEBL	0.638734	6.99029	5.20984	3.14518e-05	0.0012135	2.44131
PIGF	-0.711602	6.20395	-5.20483	3.18338e-05	0.00122038	2.42968
RMDN2	-1.36176	6.4056	-5.20387	3.19073e-05	0.00122038	2.42745
CARD6	1.01315	5.21572	5.19716	3.24284e-05	0.00123281	2.41184
SLC16A5	-0.626217	7.36614	-5.1897	3.30168e-05	0.0012511	2.39451
SNORA14A	0.98337	7.00404	5.18384	3.3487e-05	0.0012647	2.38088
B4GALNT2	-2.46051	7.93588	-5.1807	3.37419e-05	0.0012647	2.37357
SNORA4	0.939123	7.04618	5.18053	3.37557e-05	0.0012647	2.37318
ACKR2	-0.954505	6.64669	-5.16309	3.52067e-05	0.0013037	2.33262
IL1RN	1.91578	6.27033	5.16291	3.52219e-05	0.0013037	2.3322
SPDYE7P	-0.599028	5.00298	-5.16068	3.5412e-05	0.0013037	2.32701
OXR1	-0.770983	7.98015	-5.15974	3.54925e-05	0.00130384	2.32483
TMEM63C	-1.66216	6.41506	-5.15874	3.5579e-05	0.00130384	2.32248
OR6C72P	-0.700399	4.20574	-5.1539	3.59969e-05	0.00130869	2.31123
RGS2	1.05652	7.09578	5.15184	3.61769e-05	0.00131319	2.30642
ZNF326	-0.670006	7.80021	-5.14737	3.65694e-05	0.00131781	2.29602
LZIC	-0.621464	7.8204	-5.14128	3.71113e-05	0.00133053	2.28184
MAFF	0.58526	6.47391	5.13951	3.72703e-05	0.00133171	2.27772
GRAMD1C	-0.930597	6.6665	-5.13925	3.7294e-05	0.00133171	2.27711
CHKA	-0.648566	8.22756	-5.13538	3.76439e-05	0.00133932	2.26811
SATB2-AS1	-1.40409	6.76343	-5.12665	3.84471e-05	0.00135945	2.24776
MARVELD3	-0.806701	8.11012	-5.12401	3.86924e-05	0.00136413	2.24163
SLPI	1.44493	9.56896	5.122	3.88812e-05	0.00136871	2.23694
COTL1	0.676989	8.65229	5.12124	3.8953e-05	0.00136917	2.23516
HIGD1A	-0.671292	9.6176	-5.11782	3.92761e-05	0.00137358	2.2272
SOCS1	0.981378	7.11357	5.11336	3.97017e-05	0.00138091	2.21682
ABRACL	-0.689468	7.76584	-5.10264	4.07448e-05	0.00140461	2.19182
AQP1	0.679618	8.03936	5.09702	4.13027e-05	0.00140794	2.17872
ST6GAL1	0.689167	9.6858	5.09628	4.13759e-05	0.00140794	2.17701
SNORA7B	0.849356	8.86353	5.09425	4.15803e-05	0.00140841	2.17226
ARHGEF3	0.784322	6.84061	5.08861	4.21509e-05	0.00141949	2.15913
C1orf115	-0.839617	8.08072	-5.08491	4.25302e-05	0.00142571	2.1505
HSDL2	-0.662656	8.02758	-5.08383	4.26415e-05	0.00142571	2.14798
ETFA	-0.587689	9.51063	-5.07901	4.31425e-05	0.00144039	2.13672
RBPMS	1.2215	7.53686	5.0765	4.34044e-05	0.00144293	2.13089
RNY1P5	-1.54655	5.57112	-5.07395	4.36737e-05	0.0014457	2.12493
PEX11A	-0.713903	6.93962	-5.07299	4.37757e-05	0.00144702	2.12268
RN7SKP188	-0.701168	6.5244	-5.06488	4.46436e-05	0.00146946	2.10376
RNA5SP356	-0.91412	6.35555	-5.06358	4.47843e-05	0.00147113	2.10073
PEX26	-0.831034	9.05592	-5.06242	4.49099e-05	0.00147113	2.09803
CPEB3	-0.662335	6.80762	-5.06212	4.49423e-05	0.00147113	2.09734
CD81	0.865178	10.5851	5.0615	4.50102e-05	0.00147113	2.09588
ECHDC2	-0.625162	6.92746	-5.0603	4.51406e-05	0.00147201	2.0931
SLC22A5	-1.53002	8.71969	-5.06005	4.51679e-05	0.00147201	2.09251
RASSF6	-0.721059	7.81392	-5.05557	4.56612e-05	0.00148106	2.08205
ERBB2IP	-0.651531	10.0261	-5.05301	4.59451e-05	0.00148709	2.07607
NAT1	-0.582789	6.31365	-5.04511	4.68331e-05	0.00151106	2.05763
CDH17	-0.588725	11.7962	-5.04016	4.7398e-05	0.00152144	2.04608
CRYL1	-0.823841	8.36277	-5.03555	4.793e-05	0.0015284	2.03532
MID2	0.651243	6.50877	5.03499	4.79957e-05	0.0015284	2.034
NCS1	1.01126	6.53016	5.03491	4.80041e-05	0.0015284	2.03383
PTPN14	0.757459	6.79282	5.03431	4.80739e-05	0.0015284	2.03243
LRRC66	-1.09606	6.73492	-5.03301	4.82263e-05	0.00153115	2.02938
ADCY6	-0.655459	8.54124	-5.03003	4.85759e-05	0.00153389	2.02243
SLC19A3	-1.1538	6.32018	-5.02833	4.87757e-05	0.00153637	2.01847
SORD	0.802408	8.30328	5.0273	4.88981e-05	0.00153708	2.01606
MYC	0.623229	7.80644	5.02237	4.94854e-05	0.00154793	2.00455
GRB10	0.709326	6.71415	5.01893	4.99007e-05	0.00155674	1.9965
DDX26B	-0.873571	6.71961	-4.99842	5.24445e-05	0.00161449	1.9486
KCNK5	-0.868755	7.64848	-4.99748	5.25643e-05	0.00161604	1.9464
ASRGL1	0.799556	7.37519	4.9956	5.28046e-05	0.00161793	1.942
RNFT1	-0.657828	8.59869	-4.99522	5.28537e-05	0.00161793	1.94111
RNU4ATAC14P	0.778566	5.97155	4.99139	5.3347e-05	0.00162095	1.93216
STRADB	-0.769359	9.68167	-4.98673	5.39535e-05	0.0016329	1.92127
PKD1P1	-0.812185	8.94046	-4.98555	5.41085e-05	0.00163547	1.9185
FAM219B	-0.602446	6.55225	-4.9844	5.42592e-05	0.0016379	1.91582
MICALCL	-0.713155	6.62408	-4.98085	5.47284e-05	0.00164779	1.90753
CH25H	0.983467	6.2241	4.97849	5.50427e-05	0.00165512	1.90201
HNF4G	-0.91683	8.46983	-4.97185	5.59366e-05	0.0016741	1.88649
ARHGEF37	-0.731807	6.6229	-4.96987	5.62057e-05	0.0016771	1.88187
MMP14	0.750344	7.86577	4.96522	5.68444e-05	0.00168894	1.87098
MT-TP	-1.40908	9.14387	-4.96512	5.68577e-05	0.00168894	1.87076
MGLL	-0.614162	8.67651	-4.96425	5.69786e-05	0.00168935	1.86871
TGFB3	0.753515	5.87166	4.96094	5.74373e-05	0.00169567	1.86099
RDH5	-0.702433	6.88543	-4.96062	5.74829e-05	0.00169567	1.86022
AKAP1	-0.635729	9.30967	-4.95994	5.75775e-05	0.00169632	1.85864
NEK3	-0.757598	7.57728	-4.95831	5.78062e-05	0.00170026	1.85482
TRIM29	1.61448	7.05586	4.95742	5.79303e-05	0.00170026	1.85275
PMM1	-0.7134	7.1482	-4.95301	5.85541e-05	0.00170936	1.84244
BDH2	-0.794298	6.01945	-4.95185	5.87199e-05	0.00170936	1.83971
MST1	-0.825528	6.07273	-4.95161	5.87539e-05	0.00170936	1.83916
CHAD	-1.07965	6.98382	-4.94852	5.91965e-05	0.00171649	1.83193
DUSP10	1.12707	6.28408	4.94836	5.92197e-05	0.00171649	1.83155
MAPKAPK5-AS1	-0.608793	5.83117	-4.94586	5.95803e-05	0.00172265	1.8257
MICA	-0.665221	6.70273	-4.93981	6.04615e-05	0.00173735	1.81156
GNA15	1.21519	7.39216	4.93761	6.07854e-05	0.00174198	1.80641
SGMS1	0.72333	7.35768	4.9372	6.08465e-05	0.00174198	1.80544
CCDC68	-0.939142	8.05253	-4.93661	6.09336e-05	0.00174233	1.80407
CAV1	1.18469	7.99402	4.9258	6.25554e-05	0.00177997	1.77876
FNIP2	-0.623483	9.31775	-4.90774	6.53623e-05	0.00182858	1.73649
VNN1	3.23146	6.73014	4.90636	6.55816e-05	0.00182872	1.73326
USP30	-0.709642	8.78313	-4.90309	6.61039e-05	0.00183829	1.72562
FGFR1	0.610295	6.52483	4.89959	6.66689e-05	0.00184465	1.71742
SEPHS2	-0.638907	9.10434	-4.89923	6.67285e-05	0.00184465	1.71656
ACSF2	-1.5849	8.27009	-4.89619	6.72224e-05	0.00185171	1.70946
P2RX4	-0.810077	8.60641	-4.89125	6.80351e-05	0.00186798	1.69789
TRPV3	-0.89962	6.00311	-4.89011	6.82232e-05	0.00186824	1.69523
SNORA64	0.716862	6.33491	4.88053	6.98327e-05	0.00190613	1.67277
ZNF814	-0.871074	6.45586	-4.88041	6.98522e-05	0.00190613	1.6725
HSD17B11	-0.733511	10.7906	-4.87287	7.11458e-05	0.00193463	1.65483
MT-TD	-1.44076	6.08676	-4.86949	7.1732e-05	0.0019483	1.64693
MIR215	-1.95383	5.07376	-4.86578	7.23827e-05	0.00196043	1.63823
NPIPA3	-0.767666	9.37341	-4.86417	7.26665e-05	0.00196043	1.63446
ASPHD2	1.08874	6.70713	4.8622	7.30168e-05	0.00196375	1.62983
RN7SL541P	-0.754126	5.09373	-4.86196	7.30591e-05	0.00196375	1.62928
SNORD116-25	0.882718	5.11093	4.86056	7.33075e-05	0.00196815	1.62601
ABCB1	-1.9261	7.89595	-4.85568	7.4183e-05	0.0019848	1.61458
AQP8	-3.94456	8.7658	-4.85345	7.45878e-05	0.00199259	1.60933
C1QTNF1	0.620485	7.52478	4.85313	7.46453e-05	0.00199259	1.60859
LLGL2	-0.590797	9.21357	-4.84814	7.55576e-05	0.00201081	1.59689
ETNK1	-1.02875	8.40968	-4.84202	7.66919e-05	0.00202767	1.58255
RPS6KA6	-1.45065	7.06978	-4.8414	7.68078e-05	0.00202767	1.58109
SNORA52	0.880319	8.9875	4.84128	7.68293e-05	0.00202767	1.58082
NAT8B	-0.988668	6.2127	-4.84021	7.70302e-05	0.00202838	1.57831
FAM27E2	-0.667662	6.37881	-4.83651	7.77271e-05	0.00203981	1.56964
PRKG2	-2.25207	5.73098	-4.83211	7.85638e-05	0.00205588	1.55933
PPARGC1A	-1.55183	8.33062	-4.8295	7.90647e-05	0.0020597	1.55321
JUNB	0.880831	9.51667	4.82928	7.91062e-05	0.0020597	1.5527
SNORA54	0.971172	7.16323	4.82761	7.94303e-05	0.00206359	1.54877
ST3GAL2	0.941335	7.25121	4.82475	7.99842e-05	0.00206901	1.54207
LETM1	-0.708047	8.89296	-4.82336	8.02547e-05	0.00207116	1.53882
BRINP3	-1.85785	5.81595	-4.82003	8.09096e-05	0.00208115	1.531
SLC7A8	0.594402	8.78478	4.81765	8.13783e-05	0.00208616	1.52544
PLD1	-0.720232	8.30866	-4.81738	8.14322e-05	0.00208616	1.5248
LYRM7	-0.634544	6.28286	-4.81556	8.1795e-05	0.00209182	1.52052
TIMP1	1.74377	9.77578	4.81042	8.28246e-05	0.00210714	1.50848
EXOC6B	-0.591343	8.55406	-4.80616	8.36888e-05	0.00211757	1.49848
SDHAP1	-0.595186	10.097	-4.79352	8.63056e-05	0.00216965	1.46884
HOOK1	-0.828612	8.11421	-4.7924	8.65409e-05	0.00217322	1.46622
SLAIN1	0.889493	6.13905	4.79071	8.68984e-05	0.00217757	1.46225
TMEM37	-1.32597	9.03249	-4.7905	8.69427e-05	0.00217757	1.46176
ANPEP	-2.4248	10.29	-4.79026	8.69942e-05	0.00217757	1.46119
SELM	0.654617	8.23393	4.78655	8.77829e-05	0.00219025	1.4525
SNORD3B-1	1.09198	9.17097	4.78265	8.8623e-05	0.00220884	1.44333
VLDLR	-1.15178	6.33732	-4.78166	8.88367e-05	0.00221181	1.44102
CYP2C9	-0.724077	5.22233	-4.7756	9.01586e-05	0.00223755	1.4268
CDK3	-0.685098	6.16398	-4.77074	9.12326e-05	0.00225462	1.4154
PRAF2	0.887156	6.91799	4.77073	9.12334e-05	0.00225462	1.41539
ZNF117	-0.592898	6.84522	-4.76733	9.19929e-05	0.00226344	1.40741
APLNR	0.942925	6.90314	4.76697	9.20741e-05	0.00226344	1.40656
AZIN2	-0.63864	6.24361	-4.76621	9.22448e-05	0.0022652	1.40478
PTP4A1P7	-0.587959	7.93825	-4.75871	9.39459e-05	0.00229488	1.38719
MST1L	-1.11115	6.58759	-4.75632	9.44963e-05	0.00230591	1.38157
PPP2R3A	-1.25202	6.86394	-4.75489	9.48263e-05	0.00231154	1.37821
NXPE2	-1.14854	7.68973	-4.75441	9.49364e-05	0.00231181	1.37709
ZNF350	-0.650585	6.76612	-4.75096	9.57385e-05	0.00232596	1.369
ENC1	0.632448	7.28332	4.75062	9.58172e-05	0.00232596	1.3682
PTPRS	0.602396	6.91028	4.7479	9.64565e-05	0.00233419	1.3618
NR4A2	2.1012	7.19006	4.74467	9.72176e-05	0.00234287	1.35424
GPT	-0.664425	7.62389	-4.73621	9.9245e-05	0.00236086	1.33438
AFG3L2	-0.580029	8.40012	-4.73606	9.92808e-05	0.00236086	1.33403
SDR16C5	0.868649	5.6446	4.73459	9.96369e-05	0.00236483	1.33058
CSRP2	0.58655	7.38348	4.73454	9.96508e-05	0.00236483	1.33045
SFXN5	-0.618301	6.66788	-4.73065	0.000100601	0.00238495	1.32132
C6orf136	-0.7212	7.71108	-4.7275	0.000101375	0.00239794	1.31394
FN1	1.55212	8.77124	4.71926	0.000103434	0.00241527	1.29459
NPIPA7	-0.771183	9.84793	-4.71666	0.000104091	0.00242737	1.28849
BOC	0.651257	5.70627	4.71505	0.000104501	0.00243287	1.28471
IL33	1.25319	5.14979	4.7141	0.000104745	0.0024361	1.28247
FAIM2	1.001	6.4639	4.71239	0.000105182	0.00244139	1.27846
GNA11	-0.592146	10.5145	-4.71011	0.000105769	0.00245257	1.27311
AKIRIN2	0.648189	8.59247	4.70741	0.000106468	0.00245901	1.26676
CMAHP	-1.06255	7.01968	-4.70552	0.000106959	0.00246373	1.26234
MIR30E	-0.646308	4.88953	-4.70468	0.000107179	0.00246566	1.26036
ADARB1	0.648023	6.54497	4.70402	0.000107352	0.00246718	1.25882
PRSS22	0.593171	6.62176	4.70139	0.000108043	0.00247583	1.25264
PAQR5	-1.23075	8.00263	-4.69786	0.000108977	0.00248876	1.24435
INPP5J	-0.773494	7.01798	-4.69702	0.000109201	0.00249004	1.24238
SLC16A2	0.629184	6.42501	4.69407	0.00010999	0.0025007	1.23545
RAPGEFL1	-1.04348	9.28397	-4.69287	0.000110313	0.00250337	1.23264
FASTKD1	-0.753249	7.25779	-4.69003	0.00011108	0.00251322	1.22596
GPX2	0.581909	11.4814	4.68855	0.000111483	0.00251404	1.22248
PARP8	1.24499	7.44453	4.68546	0.000112326	0.00252168	1.21523
IMPA1P	-0.714638	5.82548	-4.68509	0.000112428	0.00252168	1.21436
CD276	0.624531	8.03452	4.6812	0.000113501	0.00253633	1.20522
HAS3	-0.647788	6.50403	-4.68119	0.000113503	0.00253633	1.2052
SLC23A3	-0.964516	6.11575	-4.67787	0.000114425	0.00255173	1.19742
SLC23A1	-0.971348	6.81253	-4.67135	0.000116262	0.0025828	1.1821
CNN2	0.75931	9.09838	4.66699	0.000117505	0.00260546	1.17187
BSG	-0.654054	10.6317	-4.6663	0.000117704	0.00260557	1.17024
SNORD46	0.806031	8.04292	4.66557	0.000117914	0.00260709	1.16852
RNU6-353P	-0.643407	4.73134	-4.65634	0.0001206	0.00264639	1.14685
GLB1L2	-0.761415	8.29174	-4.6557	0.000120791	0.00264807	1.14534
LOC344887	-1.33859	6.76608	-4.64959	0.000122604	0.00266115	1.131
TDP2	-0.89717	9.73784	-4.64888	0.000122819	0.00266234	1.12931
CASP6	-0.583964	7.66002	-4.64814	0.00012304	0.00266234	1.12758
PSD3	-0.769226	7.39202	-4.64327	0.000124514	0.00269171	1.11613
TINAG	-1.30577	6.81688	-4.642	0.000124899	0.00269505	1.11316
FLRT2	0.775778	5.57373	4.63354	0.000127506	0.0027315	1.09329
PODXL	0.778937	8.5275	4.63248	0.000127837	0.00273313	1.0908
MRPL35	-0.595669	8.74053	-4.63144	0.000128164	0.00273605	1.08834
PCCA	-0.646515	8.36203	-4.63126	0.000128219	0.00273605	1.08793
GPRC5B	0.917417	7.45275	4.63029	0.000128523	0.00273776	1.08565
AQP7P1	-0.75404	5.97296	-4.62586	0.00012992	0.00276176	1.07526
CYP2R1	-0.617925	7.27004	-4.61911	0.000132082	0.00278714	1.05938
ETV1	0.628971	5.43111	4.61341	0.000133934	0.00281189	1.04599
SLC26A6	-0.590083	8.46663	-4.61182	0.000134453	0.00281911	1.04227
TMIGD1	-2.58163	8.40417	-4.60761	0.000135845	0.0028438	1.03236
RAB3D	0.590794	7.64044	4.60731	0.000135944	0.0028438	1.03166
LRRC19	-1.42321	8.67698	-4.60645	0.000136231	0.0028438	1.02964
MT-TT	-1.9389	7.98047	-4.60621	0.000136308	0.0028438	1.02909
PDHA1	-0.590657	9.38878	-4.59927	0.00013864	0.00286934	1.01278
HNMT	-0.690655	7.44516	-4.59539	0.00013996	0.0028864	1.00367
EGR1	1.67687	9.01418	4.59467	0.000140208	0.00288895	1.00196
TMEM220	-1.00774	6.71492	-4.59248	0.000140961	0.00289466	0.996811
AMY2B	-0.896679	5.8188	-4.59242	0.000140982	0.00289466	0.996672
RN7SKP127	-0.946108	4.33887	-4.58737	0.00014273	0.00291567	0.984818
NFATC2	0.633602	7.48574	4.58686	0.000142909	0.00291567	0.983617
INSL5	2.72432	7.34697	4.58686	0.00014291	0.00291567	0.983611
ACAT1	-0.855342	8.37864	-4.58658	0.000143006	0.00291567	0.982964
AGMAT	-0.600972	8.40753	-4.58416	0.000143855	0.00292785	0.977275
TMEM236	-1.55253	8.90262	-4.583	0.000144265	0.00293364	0.974534
ARGLU1	-0.817254	8.29906	-4.58119	0.000144902	0.00294146	0.970299
CYP39A1	0.647456	5.0465	4.57953	0.000145491	0.00294828	0.966401
MRGPRF	0.677805	5.99727	4.5744	0.000147326	0.00297213	0.954346
PTGR1	-0.805582	7.13845	-4.57139	0.000148415	0.00298082	0.94727
CLIP2	-0.612257	7.61614	-4.57091	0.00014859	0.00298082	0.946134
STX3	-0.62136	8.5072	-4.57061	0.000148698	0.00298082	0.945438
SLC17A9	0.745991	7.4899	4.57044	0.00014876	0.00298082	0.945037
IQSEC1	0.682524	7.49162	4.56413	0.000151072	0.00300648	0.930207
SLC25A34	-0.850256	6.75507	-4.56224	0.000151772	0.00301011	0.925767
RNU1-59P	0.981011	5.96188	4.56119	0.000152163	0.00301531	0.923292
ZNF257	-0.850343	4.51693	-4.55951	0.000152788	0.00302029	0.919349
PRRX1	1.4552	6.30134	4.55558	0.000154263	0.00304142	0.910111
SPATS2L	-0.61775	9.57066	-4.55021	0.000156303	0.00306607	0.897484
ADAMTS1	1.2485	6.35219	4.54667	0.000157659	0.00308024	0.889184
MIR194-1	-1.66447	5.16672	-4.5466	0.000157687	0.00308024	0.889012
SLC7A1	0.782801	8.57154	4.54438	0.000158546	0.00309444	0.883787
CDH3	2.1048	6.65819	4.54112	0.000159815	0.00311659	0.876126
CCNJL	-0.880032	7.89421	-4.53955	0.00016043	0.00312445	0.872435
GPR124	0.77618	7.39677	4.5394	0.000160486	0.00312445	0.872096
ACSS2	-0.702999	9.65902	-4.53838	0.000160889	0.00312708	0.869686
EFTUD1	-0.588336	6.67764	-4.53569	0.00016195	0.00313984	0.863369
PTRF	0.893647	6.8984	4.53325	0.000162918	0.00315336	0.857642
GPD1L	-0.740239	8.30633	-4.53249	0.000163221	0.00315365	0.855857
RIOK3	-0.62534	9.1988	-4.5322	0.000163339	0.00315365	0.855159
CSRNP1	0.652757	6.34547	4.53183	0.000163487	0.00315389	0.854292
PI3	2.3278	8.57313	4.52276	0.000167152	0.00320507	0.832982
ACAA2	-0.794022	8.78983	-4.51997	0.000168297	0.00321003	0.826423
MEP1B	-2.7827	6.34075	-4.51684	0.000169589	0.00322885	0.81907
TST	-0.702115	10.6945	-4.51588	0.000169988	0.00323379	0.816814
SLC3A1	-1.24649	6.63425	-4.51198	0.000171616	0.0032515	0.807653
SETD9	-0.845681	6.0254	-4.50684	0.000173787	0.00328169	0.795572
PLXNA2	-0.697843	7.92208	-4.50095	0.000176307	0.0033081	0.781737
ACADS	-1.02695	8.90015	-4.49986	0.000176778	0.0033132	0.779174
PML	0.668551	7.25264	4.49957	0.000176906	0.0033132	0.778478
HOXA4	-0.636449	5.83854	-4.49744	0.000177829	0.00332328	0.773478
ITPKA	-0.731366	7.06499	-4.49469	0.000179027	0.00333764	0.767025
LOC100128288	-0.68767	5.83365	-4.49138	0.000180486	0.00336214	0.75923
ACAA1	-0.597142	7.13969	-4.49073	0.000180771	0.00336476	0.757713
LANCL3	-0.771057	5.78441	-4.48903	0.000181523	0.00337606	0.753726
C7orf31	-0.914027	7.37543	-4.48715	0.00018236	0.00338893	0.749302
ZNF675	-0.589008	7.21118	-4.48333	0.000184072	0.00341233	0.740326
SEC24D	0.775599	8.41223	4.48215	0.000184605	0.00341702	0.737547
AMACR	-1.18094	8.41405	-4.48019	0.000185494	0.00342803	0.732932
FMOD	0.845568	7.97794	4.47106	0.00018968	0.00348525	0.711494
PIP5K1B	-0.642635	8.34999	-4.47051	0.000189936	0.00348525	0.710197
RUNDC3B	-1.1118	6.35659	-4.46778	0.00019121	0.00350588	0.703772
CHST3	0.58911	6.38788	4.46623	0.000191936	0.00351364	0.700136
SLC25A33	-0.815062	6.8469	-4.46378	0.000193089	0.00352645	0.69438
MOCS1	-0.685706	6.46361	-4.46155	0.000194145	0.00354295	0.689143
MROH7	-0.6359	6.13208	-4.45782	0.000195926	0.00356708	0.680367
LCN2	2.63628	9.61291	4.45671	0.000196458	0.00357118	0.677766
GREM1	1.64076	8.79282	4.45605	0.000196773	0.00357285	0.676224
EFHC1	-0.600207	6.30778	-4.45262	0.000198432	0.00359305	0.668163
EPHB3	0.732711	8.10318	4.44847	0.000200458	0.0036185	0.658401
NBPF8	-0.598639	9.37047	-4.44348	0.000202918	0.0036482	0.646689
CCDC146	-0.794966	6.35668	-4.44286	0.000203226	0.00364867	0.645231
GJB3	0.633285	5.80235	4.44191	0.000203702	0.00365421	0.642982
SNORA37	0.820002	8.89892	4.43455	0.000207404	0.0036949	0.625688
ADH6	-1.14215	7.21401	-4.43433	0.000207515	0.0036949	0.625173
PCDH17	0.693237	6.30763	4.43369	0.000207838	0.0036949	0.623681
SCARNA8	0.714733	5.8813	4.43234	0.000208524	0.00370103	0.620514
PEA15	0.899751	9.70457	4.43162	0.000208892	0.00370473	0.618821
SNORD116-11	0.714227	5.25678	4.43044	0.000209498	0.00371101	0.616038
ZNF91	-0.9306	9.38069	-4.43031	0.000209564	0.00371101	0.615735
SMPDL3A	-0.898738	9.64176	-4.42829	0.000210603	0.00372093	0.610985
PLK2	0.673964	6.46678	4.42585	0.000211866	0.00372893	0.605243
GDA	-0.799761	7.99613	-4.42571	0.000211936	0.00372893	0.604926
CD3E	0.863039	7.95243	4.42483	0.000212392	0.00372893	0.602864
C17orf97	-0.827935	6.36441	-4.42286	0.000213419	0.00372938	0.59823
SLC22A3	-0.819807	5.37923	-4.42274	0.000213483	0.00372938	0.597946
IGSF9	-0.879316	7.68916	-4.41914	0.000215372	0.00375957	0.589486
CDKL1	-0.661066	6.04687	-4.41674	0.000216638	0.00377033	0.583856
NPY1R	-1.06753	4.74715	-4.41469	0.000217727	0.00377731	0.579041
LEAP2	-1.05192	5.89655	-4.41344	0.000218398	0.00378405	0.576087
TLDC2	-0.592612	7.94859	-4.41135	0.000219515	0.00379494	0.571187
LUC7L3	-0.79967	7.18098	-4.40667	0.000222041	0.00381975	0.560201
PACS1	0.931561	8.06696	4.40657	0.000222098	0.00381975	0.559958
SLC35D1	-0.666168	8.34031	-4.40465	0.000223145	0.00383211	0.55544
KITLG	-0.600442	6.63356	-4.40389	0.000223557	0.00383635	0.553671
HMOX1	-0.838796	7.80706	-4.40059	0.000225374	0.00385901	0.545898
SULT1A1	-0.628527	6.43997	-4.3987	0.000226415	0.00386831	0.541473
ZNF429	-0.886358	6.5645	-4.39682	0.000227459	0.00387761	0.537058
CDKN2B	-1.16805	8.82662	-4.39565	0.000228111	0.00387761	0.534308
TMEM109	0.751212	9.1284	4.39515	0.000228393	0.00387761	0.533122
PRAP1	-0.742961	7.57028	-4.39147	0.000230459	0.00390023	0.524478
UST	0.630269	6.03383	4.38433	0.000234521	0.0039432	0.507703
IL1B	2.38071	6.75238	4.38045	0.000236759	0.00396542	0.498587
RNU1-83P	0.609425	6.14227	4.37713	0.000238687	0.00398165	0.490801
GPR160	-0.820471	8.6947	-4.37651	0.000239052	0.00398204	0.489334
HRSP12	-0.603227	7.5828	-4.37427	0.000240365	0.00400104	0.484078
MT-TV	-0.585508	12.17	-4.36989	0.000242953	0.00402973	0.473798
SLC9A3R1	-0.700712	10.232	-4.36599	0.000245283	0.00405109	0.464635
NAT8	-0.619012	5.53943	-4.3626	0.000247328	0.00407653	0.456667
LOC101059935	-1.28039	5.73628	-4.36078	0.000248431	0.00408842	0.452399
PLA2G12B	-1.04126	5.94794	-4.35543	0.000251705	0.00412443	0.439831
SNORD116-26	1.07694	4.96152	4.35422	0.000252452	0.00412563	0.436987
SCUBE2	-1.28579	6.95629	-4.35042	0.000254813	0.00415526	0.428054
SLC28A3	1.21862	6.32354	4.34975	0.000255226	0.00415639	0.4265
TGM2	1.6603	9.27076	4.34662	0.000257189	0.00417377	0.419147
ZG16B	1.01915	9.2596	4.3441	0.000258785	0.00419091	0.413213
DHRS11	-1.46918	10.1993	-4.34176	0.000260269	0.00420617	0.407727
CLCN4	0.653518	5.22104	4.33816	0.000262574	0.00423564	0.399265
C1orf198	0.608817	7.58136	4.33749	0.000263001	0.00423564	0.397705
NR4A3	0.90141	5.80684	4.33521	0.000264472	0.00425293	0.392353
OSBPL1A	-0.582563	7.10083	-4.32823	0.00026903	0.004303	0.37596
FLNA	1.08241	9.37281	4.3262	0.00027037	0.0043126	0.371192
ZHX2	0.725068	7.59437	4.32522	0.000271019	0.00431605	0.36889
PDLIM3	0.817463	6.49831	4.32481	0.000271293	0.00431605	0.367923
XRCC6BP1	-0.590197	7.5992	-4.32027	0.00027432	0.00434888	0.357276
MTCL1	0.604762	5.99243	4.3202	0.000274367	0.00434888	0.357114
FYN	0.924639	6.88296	4.31828	0.000275664	0.00435587	0.35259
BMP3	-2.36334	7.8361	-4.31593	0.000277249	0.00436621	0.347089
EFEMP2	0.62748	6.99361	4.31361	0.00027883	0.00438157	0.341632
KLRC4	-0.732417	4.42168	-4.31166	0.00028016	0.00439654	0.337068
AKAP2	0.686904	6.41716	4.30937	0.000281739	0.00440537	0.331678
ZFP3	-0.693465	7.12377	-4.30883	0.000282113	0.00440641	0.330405
TGFA	-0.708432	6.81935	-4.30335	0.000285918	0.00443906	0.317555
VILL	-0.587195	8.49502	-4.29938	0.000288711	0.00447051	0.30823
KIAA0226L	0.601149	7.16745	4.29807	0.000289633	0.00448182	0.305171
PLVAP	0.932511	8.35891	4.29684	0.000290512	0.00448803	0.302267
FGF2	0.744996	6.94408	4.29589	0.000291187	0.00449055	0.300039
CXCL3	0.731946	6.3322	4.29565	0.000291354	0.00449055	0.299489
GUCA2B	-1.59458	9.52783	-4.29404	0.000292506	0.00450319	0.295704
KCND3	1.66176	6.51145	4.29308	0.000293198	0.00450408	0.293439
SLC7A2	0.911429	6.08301	4.28702	0.000297574	0.00455928	0.27923
CD34	1.0624	7.44646	4.28558	0.000298627	0.00456881	0.275843
XBP1	0.843818	10.6911	4.28171	0.000301469	0.00460382	0.26676
ODF2L	-0.607912	6.21042	-4.27973	0.000302929	0.00460611	0.262126
KDELR3	1.09384	8.951	4.27882	0.000303605	0.00460663	0.259991
RNF122	0.755983	6.44832	4.27879	0.00030363	0.00460663	0.259912
DIRC2	0.609812	9.84671	4.27556	0.000306036	0.00462738	0.252341
PHLDA1	1.31771	7.40941	4.26803	0.000311726	0.00469542	0.234678
GUCY1B3	1.02131	6.04658	4.26781	0.000311899	0.00469542	0.234144
TMEM133	-0.658785	7.52152	-4.26658	0.000312841	0.00470048	0.231255
LPCAT1	1.14504	7.93506	4.26287	0.000315691	0.00471978	0.222559
SCIN	-1.11878	7.82076	-4.2628	0.000315746	0.00471978	0.222393
TMEM184B	0.596013	8.55003	4.26101	0.000317131	0.00472788	0.218195
ATP2B4	0.69276	7.80146	4.25841	0.000319155	0.00474336	0.212096
C12orf36	-1.2501	9.12668	-4.2566	0.000320573	0.00475231	0.207846
TSPAN18	0.74509	6.60524	4.25429	0.00032239	0.00477621	0.202427
VSIG10	-0.681398	7.83381	-4.24973	0.000326008	0.00481755	0.19173
CEP70	-0.611555	6.66973	-4.24906	0.00032654	0.00481923	0.190167
ARL14	-0.68423	7.47774	-4.24813	0.000327287	0.00481923	0.187976
SLC39A2	-0.628788	4.86495	-4.24776	0.000327584	0.00481923	0.187107
COL4A1	1.08818	7.0523	4.24726	0.000327982	0.00481923	0.185942
AEBP1	0.674933	7.86941	4.24646	0.000328623	0.00482561	0.18407
PMFBP1	-0.652397	5.51012	-4.24279	0.000331584	0.00485079	0.175472
RAMP2	0.645777	6.50115	4.24279	0.000331587	0.00485079	0.175464
LPCAT3	-0.631871	10.7898	-4.22653	0.000345045	0.00498817	0.137331
LOC102725070	-1.31695	5.93864	-4.22621	0.000345317	0.00498901	0.136576
COL15A1	0.983355	6.9872	4.22508	0.000346274	0.00499664	0.133924
ZFPM2	0.919766	6.42296	4.22407	0.000347126	0.00499965	0.131568
DDX60	-0.826156	8.25109	-4.22059	0.000350093	0.00502852	0.123412
LBH	0.928993	6.69893	4.2192	0.000351286	0.00503608	0.120152
ACACB	-0.588357	7.28225	-4.21915	0.00035133	0.00503608	0.120032
ACKR1	0.707947	6.26336	4.21909	0.000351384	0.00503608	0.119884
KAL1	0.609071	4.93419	4.21615	0.00035392	0.00506308	0.112993
SLC51A	-1.7594	6.86441	-4.21544	0.000354532	0.00506872	0.111338
RETSAT	-0.718098	10.1159	-4.21342	0.000356295	0.00508822	0.106584
RNU6-377P	-0.811602	6.44934	-4.21158	0.000357896	0.00510428	0.10229
PTGDR	-1.07177	7.96748	-4.20994	0.00035934	0.00511862	0.0984313
EFNA3	0.658051	7.5029	4.20532	0.000363425	0.00516104	0.0875994
MXI1	-0.62201	8.1118	-4.20406	0.000364546	0.0051738	0.0846486
OLFM4	2.25645	11.4699	4.19846	0.000369574	0.00522923	0.0715253
PDZK1IP1	1.31187	9.27702	4.19722	0.000370698	0.0052356	0.0686157
STEAP4	1.73106	5.90192	4.194	0.000373622	0.00526711	0.0610885
SIK1	1.25112	7.08856	4.1939	0.000373719	0.00526711	0.0608388
MTNR1A	1.0548	8.20621	4.19353	0.000374057	0.00526711	0.0599733
SLC26A3	-1.04488	12.4927	-4.192	0.000375461	0.00526711	0.0563858
NAT2	-0.881506	6.78964	-4.19122	0.000376175	0.00526711	0.0545658
NUDT12	-0.796482	7.26614	-4.19101	0.000376371	0.00526711	0.0540648
SMAP2	0.807177	8.75429	4.19079	0.000376573	0.00526711	0.0535515
CRIP2	0.644989	7.67607	4.19067	0.000376682	0.00526711	0.0532755
CDH5	1.01193	7.34302	4.18803	0.000379125	0.00529685	0.0470806
FLJ38379	-0.750021	5.67289	-4.18558	0.0003814	0.00532224	0.0413516
ITGA5	1.44727	7.72772	4.18478	0.000382152	0.00532317	0.039465
IFI44L	0.965253	5.86149	4.18385	0.000383018	0.00532945	0.0372968
RNU4-38P	-0.911817	4.96224	-4.18381	0.00038306	0.00532945	0.0371913
QSOX1	0.68855	9.84707	4.1817	0.000385035	0.00534924	0.0322643
FMO4	-0.937288	6.92331	-4.18131	0.000385401	0.00534924	0.0313548
ARID5A	0.593799	6.57842	4.16607	0.000400039	0.00549028	-0.00434822
NAPEPLD	-0.782114	8.38588	-4.16474	0.000401344	0.00550172	-0.00746804
PMEPA1	0.759101	7.7822	4.16394	0.000402126	0.00550596	-0.00933219
CD55	1.54581	9.60152	4.16286	0.000403193	0.0055141	-0.0118707
SNORD24	-0.612105	6.38595	-4.16145	0.00040459	0.00552671	-0.0151829
USP2	-1.10173	8.04706	-4.16093	0.000405101	0.00552721	-0.0163912
SDR42E1	-0.598842	6.79822	-4.15858	0.000407434	0.00555254	-0.0218896
NAALADL1	-1.08663	7.14885	-4.15637	0.000409646	0.00556641	-0.0270742
SEPSECS	-0.604277	7.37774	-4.15543	0.000410585	0.00556942	-0.0292665
PRELID2	-0.601294	7.66792	-4.15016	0.000415908	0.00562199	-0.0416001
ABCC5	-0.614306	6.60421	-4.14956	0.000416521	0.00562702	-0.0430119
RNVU1-10	0.595601	9.40605	4.1472	0.000418936	0.00564912	-0.0485455
KANSL1L	0.625364	6.14607	4.14692	0.000419216	0.00564912	-0.0491863
QPCT	0.707522	6.10505	4.14468	0.000421527	0.00565437	-0.0544505
LINC01106	-0.776852	6.52736	-4.14367	0.00042256	0.00565813	-0.0567922
UGT1A1	-1.22313	7.289	-4.13407	0.000432598	0.00575607	-0.0792684
NR4A1	1.18715	7.20405	4.13154	0.000435283	0.00577996	-0.0851914
CLDN12	0.683321	9.55087	4.12995	0.000436976	0.00578918	-0.0889082
ENTPD5	-1.19656	9.41593	-4.12955	0.000437404	0.00578918	-0.0898443
TPRG1	0.596254	4.92124	4.12949	0.000437467	0.00578918	-0.0899841
TRIB1	0.642173	9.22985	4.12888	0.00043813	0.00579465	-0.0914322
CXorf36	0.711211	5.16667	4.12848	0.00043855	0.00579692	-0.0923507
FAM177A1	-0.594913	7.37101	-4.12809	0.000438967	0.00579914	-0.0932586
SNORD94	0.956123	8.88312	4.12567	0.000441578	0.00582703	-0.0989366
ADAMTS4	0.773735	5.70119	4.11849	0.0004494	0.0059035	-0.115742
CYP2B7P	-2.05824	6.83439	-4.11681	0.000451247	0.0059194	-0.119667
PDE4B	0.97589	5.96864	4.11576	0.000452409	0.005923	-0.12213
PKM	0.604628	9.979	4.11289	0.000455589	0.00595576	-0.128834
CA2	-1.07864	10.4408	-4.11186	0.000456734	0.00595576	-0.131236
TPRG1L	-0.619675	9.12329	-4.11106	0.000457637	0.00595576	-0.133126
ELK3	0.888232	7.37878	4.11098	0.000457722	0.00595576	-0.133303
RNU6-174P	-0.636588	6.27863	-4.11058	0.000458174	0.00595728	-0.134248
CTAGE15	-0.728426	5.71543	-4.1084	0.000460617	0.00597911	-0.139336
SCARA3	0.757385	7.22517	4.10262	0.000467175	0.00603356	-0.152865
SERPINB5	2.40326	6.67398	4.102	0.000467877	0.00603398	-0.154302
GIPC2	-0.78409	8.4812	-4.09852	0.000471875	0.00606206	-0.162444
MYO1D	-0.710784	10.4398	-4.09743	0.000473139	0.0060656	-0.165003
MOGAT2	-0.970186	8.62995	-4.09738	0.000473192	0.0060656	-0.165109
HHLA2	-0.750427	10.6765	-4.09098	0.000480655	0.00613427	-0.180082
BMP7	0.620331	5.95808	4.08816	0.000483979	0.00616656	-0.186675
NHEJ1	-0.624574	7.4777	-4.08378	0.000489184	0.0062125	-0.196909
VWF	1.09661	6.55703	4.08269	0.000490493	0.00622183	-0.199465
RERG	0.661797	5.5647	4.08193	0.000491403	0.00622183	-0.20124
PDK4	-1.17572	8.65986	-4.08069	0.000492886	0.00622183	-0.204121
FUT8	1.04032	7.99384	4.07892	0.000495033	0.00623918	-0.208279
GDPD3	-0.922506	8.96627	-4.07637	0.000498116	0.00626787	-0.214219
PDP1	0.927868	9.06643	4.07593	0.000498657	0.00626791	-0.215257
OTOP2	-2.34005	8.92392	-4.07327	0.000501911	0.00629522	-0.221478
CHN1	0.999151	5.72174	4.06366	0.000513832	0.00639656	-0.24393
CYR61	1.40711	6.18496	4.063	0.000514665	0.0064035	-0.245478
PTPRR	-1.25904	7.11476	-4.05888	0.000519869	0.00645376	-0.255101
SDCBP2	-0.608656	9.46931	-4.05768	0.000521393	0.00645962	-0.2579
LDLRAD3	0.60839	6.95391	4.0533	0.000527006	0.00651515	-0.268139
HDGFRP3	0.777734	7.30091	4.05309	0.000527273	0.00651515	-0.268624
MR1	0.72035	6.76931	4.0486	0.000533088	0.0065488	-0.279111
GDF15	0.973782	8.15581	4.04835	0.000533412	0.00654934	-0.279693
HSD17B2	-1.3674	8.61638	-4.04806	0.000533788	0.00655049	-0.280365
TMEM65	-0.604955	7.22127	-4.0476	0.000534394	0.00655104	-0.281451
ADCY10P1	-0.69121	4.50975	-4.04698	0.000535195	0.00655741	-0.282884
IFI6	1.09175	9.00226	4.04673	0.00053553	0.00655771	-0.283481
ADIRF	-0.792917	7.10834	-4.0461	0.000536346	0.00655771	-0.284937
HSD3B2	-1.57488	5.30737	-4.04357	0.00053968	0.00658122	-0.290862
SDHAP2	-0.598176	8.66336	-4.03292	0.000553893	0.00672638	-0.315715
STBD1	-0.839876	6.55486	-4.03262	0.000554306	0.00672789	-0.316428
REP15	-1.06381	7.39712	-4.02879	0.000559514	0.00676293	-0.325367
MCAM	1.00477	7.1206	4.02641	0.000562767	0.00679519	-0.330908
SNORA20	1.41141	9.18164	4.02544	0.00056411	0.00680436	-0.333186
ABCC9	0.86214	5.11136	4.02017	0.000571406	0.00687358	-0.345468
NCOA7	0.890794	6.89857	4.02013	0.000571461	0.00687358	-0.345561
AHNAK2	0.645033	5.66686	4.01609	0.000577125	0.00692194	-0.354988
EHD2	0.636197	7.74316	4.01219	0.000582651	0.00695599	-0.364095
BHLHE40	0.907776	8.33561	4.00938	0.000586661	0.00698954	-0.370649
TSPAN5	0.619052	6.22735	4.00803	0.000588595	0.00699828	-0.373795
NUDT7	-0.629898	7.79234	-4.00528	0.000592562	0.00702573	-0.380213
SLFN5	1.06739	7.8828	4.00484	0.000593195	0.00702573	-0.381234
ZNF440	-0.637221	6.93223	-4.00392	0.000594529	0.00702618	-0.383379
PRR15L	-0.651856	9.83672	-4.00357	0.000595043	0.00702618	-0.384206
CXorf23	-0.755272	6.37753	-4.0007	0.000599224	0.00705982	-0.390896
SLC30A4	-0.635499	8.06154	-3.99551	0.000606852	0.00714247	-0.402983
ANKDD1B	-0.681969	5.31373	-3.99319	0.000610306	0.00716417	-0.408404
SLC2A14	0.648564	5.98021	3.99284	0.000610834	0.00716417	-0.40923
SNORD59A	-0.668051	4.83507	-3.99283	0.000610848	0.00716417	-0.409253
SNORA48	0.651384	9.60077	3.9915	0.000612833	0.00718022	-0.412352
RMND5A	-0.713012	8.99983	-3.99047	0.000614373	0.00719103	-0.41475
FZD3	0.636349	6.09917	3.98906	0.000616482	0.00721125	-0.418025
RELL1	-0.582461	8.72992	-3.98734	0.000619074	0.00721706	-0.422033
EFCAB5	-0.590088	4.60836	-3.98502	0.000622595	0.00724273	-0.427449
SCARNA10	0.867917	8.35032	3.98478	0.000622961	0.00724273	-0.428012
CCDC183	-0.614092	6.08975	-3.97996	0.000630328	0.00729365	-0.439242
ZNF137P	-0.653863	4.85391	-3.97995	0.000630339	0.00729365	-0.439258
TRIM22	1.04227	6.90896	3.97813	0.000633151	0.00731576	-0.44351
CADM1	0.782401	6.3605	3.97811	0.000633176	0.00731576	-0.443548
REG4	1.97482	8.48555	3.9781	0.000633191	0.00731576	-0.443571
GUCA2A	-2.10665	10.6816	-3.97737	0.000634318	0.00732222	-0.445269
ELL2	0.715499	7.89179	3.97528	0.000637573	0.00734722	-0.450158
WSCD1	-0.769182	6.97416	-3.9699	0.000645994	0.00741223	-0.46269
SULT1B1	-0.604453	10.2287	-3.96644	0.00065146	0.00745977	-0.470737
HMGCS2	-2.96517	10.095	-3.96617	0.000651889	0.00745977	-0.471366
MFAP5	1.23574	6.41815	3.96251	0.000657746	0.00748809	-0.479907
SNORA10	0.761848	9.46795	3.96174	0.000658968	0.00749467	-0.481679
SLC1A1	-1.19424	7.95305	-3.96098	0.000660205	0.00750508	-0.48347
LDOC1	0.614703	6.45582	3.95633	0.000667722	0.0075647	-0.494281
FSTL1	1.09961	8.43645	3.95459	0.000670562	0.0075895	-0.498334
MYOCD	0.887508	6.07821	3.95384	0.000671788	0.00759931	-0.500078
ENPP3	-0.587363	7.88928	-3.95294	0.000673265	0.00759951	-0.502175
SLC9A2	-0.896426	9.50492	-3.9522	0.000674482	0.00760114	-0.503899
RNU6-600P	0.601993	6.69872	3.9507	0.000676951	0.00761742	-0.507388
GPC6	0.802657	6.74808	3.94638	0.000684128	0.00767963	-0.517456
TUBA1A	0.687816	7.90809	3.94534	0.000685871	0.00769179	-0.519885
PPARD	-0.639131	8.43438	-3.9396	0.000695525	0.00777387	-0.533229
A1CF	-0.81082	8.93494	-3.93856	0.000697299	0.00778996	-0.535661
MEP1AP4	-1.02197	6.99882	-3.93621	0.0007013	0.00780178	-0.541122
IFI16	1.09006	7.67089	3.9361	0.000701495	0.00780178	-0.541387
FOSB	1.01299	6.3453	3.93597	0.000701705	0.00780178	-0.541673
KCNE3	0.75984	6.73226	3.93522	0.000702999	0.00781244	-0.543432
STAP2	-0.703334	8.51168	-3.9347	0.000703894	0.00781493	-0.544646
PNISR	-0.607178	7.83545	-3.93438	0.000704431	0.00781653	-0.545375
PITPNC1	1.15916	7.69638	3.93407	0.000704973	0.00781653	-0.546109
TESC	0.706676	6.92393	3.93151	0.000709375	0.00785707	-0.55205
TMCC3	-0.600764	9.43581	-3.92959	0.000712707	0.00788273	-0.556522
PDK2	-0.960698	8.51969	-3.92603	0.000718925	0.00792518	-0.564814
TTYH3	0.750052	8.20208	3.92562	0.000719641	0.00792932	-0.565763
NKG7	0.581493	7.30132	3.92362	0.000723161	0.00796058	-0.57042
SNORD116-4	1.02405	7.5825	3.92308	0.000724115	0.00796731	-0.571678
HSD3BP4	-0.871375	5.54868	-3.92256	0.000725018	0.00797348	-0.572867
TSHZ2	0.770165	5.678	3.92064	0.000728428	0.00799853	-0.577345
EHHADH	-0.821636	7.12182	-3.92037	0.000728905	0.00799853	-0.57797
SVOPL	-0.693099	5.2384	-3.92031	0.000729011	0.00799853	-0.578108
SEC22C	0.672838	6.78946	3.91773	0.000733614	0.0080339	-0.584114
OPN3	-0.708233	8.28186	-3.91736	0.000734272	0.00803733	-0.58497
SLCO3A1	0.622644	7.80935	3.91371	0.00074083	0.00808688	-0.593455
PLEKHA2	0.724618	8.37639	3.91024	0.000747122	0.00813353	-0.601524
PFKFB3	1.15866	7.974	3.90799	0.000751221	0.00816533	-0.606745
SNORA57	0.673878	9.31042	3.90553	0.00075574	0.00820297	-0.612467
DPP10	-1.35056	5.65859	-3.90105	0.000764035	0.00823166	-0.622882
LIPG	0.912323	7.673	3.90064	0.000764794	0.00823602	-0.623828
CD2	0.674917	6.58204	3.89939	0.000767133	0.00825032	-0.626742
ZDHHC23	-0.671462	8.30307	-3.89833	0.000769123	0.0082571	-0.629213
MT-TC	-0.78193	10.601	-3.89827	0.000769231	0.0082571	-0.629347
ZNF844	-0.676285	5.8186	-3.89744	0.000770774	0.00826986	-0.631259
GULP1	-0.960097	6.351	-3.896	0.000773499	0.00829145	-0.634625
ICOS	1.2741	5.43132	3.89392	0.000777411	0.00831261	-0.639438
ACOX2	-0.636845	6.89569	-3.89231	0.000780473	0.00833172	-0.643187
MYO1A	-0.849729	9.55171	-3.89025	0.000784398	0.00835831	-0.647972
HRASLS2	-1.02445	6.7934	-3.88847	0.000787798	0.00837821	-0.652097
PCSK5	-1.02298	8.38499	-3.88801	0.000788687	0.00837821	-0.653172
ASTE1	-0.592897	6.23864	-3.88774	0.000789209	0.00837892	-0.653803
PLCE1	-0.843953	9.39919	-3.88754	0.00078959	0.00837915	-0.654264
LOC102725104	-0.795879	5.40784	-3.88623	0.000792113	0.00839776	-0.657306
SOCS3	1.54934	7.19362	3.88607	0.000792425	0.00839776	-0.657682
DNAJB5	0.585792	6.59731	3.88341	0.000797576	0.00844105	-0.663861
UBE2L6	0.72284	7.46235	3.88295	0.000798459	0.00844251	-0.664917
ARHGAP29	0.887581	5.0802	3.88222	0.00079988	0.00844604	-0.666613
SHH	0.713703	7.49515	3.87868	0.000806813	0.00849231	-0.674843
LRP12	-0.621705	6.05191	-3.87629	0.00081152	0.00852644	-0.68039
PTGS2	1.69819	6.36894	3.87251	0.000819019	0.00858202	-0.689161
ANKRD20A11P	-0.844133	4.98792	-3.87125	0.000821529	0.00859672	-0.692078
MYCT1	0.673743	5.54297	3.86941	0.000825226	0.0086232	-0.69636
GNAI1	-0.585938	7.00261	-3.86244	0.000839352	0.00871669	-0.712542
SNORD116-23	0.755298	7.34405	3.86058	0.000843154	0.00874448	-0.71685
CMBL	-0.996812	9.30731	-3.8604	0.000843532	0.00874451	-0.717277
S100A11	0.692628	9.64915	3.85972	0.000844923	0.00874726	-0.718848
CPB1	1.78456	5.80438	3.85881	0.000846785	0.00875876	-0.720947
TNF	0.598143	6.06079	3.85674	0.000851073	0.00878599	-0.725762
BCL3	0.66786	9.43643	3.85572	0.000853173	0.00879645	-0.728111
MYEOV	0.905461	6.85711	3.85523	0.000854204	0.00879645	-0.729262
NR1H4	-1.42536	4.9017	-3.85487	0.000854959	0.00879645	-0.730104
NRG4	-0.894233	4.9466	-3.85424	0.000856252	0.00880199	-0.731545
CLU	1.33997	7.4045	3.85401	0.000856738	0.0088031	-0.732086
RAC2	1.15459	9.00482	3.8533	0.000858214	0.00881438	-0.733727
ICAM2	0.923116	7.89244	3.85201	0.000860916	0.00883434	-0.736723
SDC3	0.67725	7.2184	3.84639	0.000872763	0.0089306	-0.749749
COL4A2	0.772316	7.40717	3.84453	0.000876727	0.0089493	-0.754068
EMP1	-1.23828	9.53997	-3.8413	0.000883638	0.00899389	-0.761551
CASP4	0.732492	7.3736	3.84123	0.000883797	0.00899389	-0.761723
RND1	1.19368	6.29384	3.84025	0.000885915	0.0090115	-0.764003
TRAT1	0.784659	5.68909	3.83612	0.000894838	0.00907849	-0.773553
ZNF320	-0.594101	6.00336	-3.83483	0.000897651	0.00909911	-0.776544
BGN	1.68162	8.21805	3.83149	0.000904984	0.00914775	-0.784297
SLC5A1	0.985553	8.87498	3.8314	0.000905186	0.00914775	-0.784509
EML1	0.682533	6.16301	3.83034	0.000907522	0.0091633	-0.786965
ADAMTS9	1.09045	6.62914	3.82826	0.000912124	0.00920179	-0.791785
C4B	1.28131	6.92872	3.82319	0.000923429	0.00929572	-0.80352
P2RY1	-0.833713	7.47631	-3.81751	0.000936264	0.00938221	-0.81667
DUSP4	0.798469	5.63067	3.81264	0.000947416	0.00946766	-0.827948
PDZK1	-1.08585	4.62268	-3.81048	0.000952412	0.00950128	-0.832958
COL1A1	1.05751	8.65566	3.80572	0.000963479	0.00958149	-0.843961
LY6E	0.857979	7.28907	3.80544	0.000964152	0.00958149	-0.844626
PLCB1	0.674881	6.29924	3.80467	0.000965957	0.00959534	-0.846408
CYP7B1	1.07281	6.80585	3.79358	0.000992335	0.00980304	-0.872062
MUC1	0.805302	10.4052	3.79329	0.000993037	0.00980582	-0.872736
FFAR4	0.820537	9.34497	3.78604	0.00101068	0.00994631	-0.889502
SNORA44	0.631061	7.45342	3.7818	0.00102114	0.0100154	-0.899302
MEP1A	-1.2531	10.6243	-3.77929	0.00102738	0.0100555	-0.905106
TMEM204	0.583107	7.55447	3.7747	0.00103888	0.0101297	-0.915697
GLI3	0.747313	5.57267	3.77367	0.0010415	0.010151	-0.918092
SLC17A8	-0.582224	5.03414	-3.77173	0.00104641	0.0101861	-0.922569
CLCN2	-0.777923	8.50888	-3.76851	0.0010546	0.0102487	-0.929996
GBA3	-1.61338	6.23417	-3.76483	0.00106407	0.0103107	-0.938502
SPCS3	0.5992	8.8105	3.76356	0.00106736	0.0103383	-0.941441
SLC16A9	-1.59149	7.46527	-3.76211	0.00107111	0.0103638	-0.944778
BATF2	0.763664	7.80522	3.76198	0.00107147	0.0103638	-0.945092
SLC26A2	-2.61467	10.4352	-3.76183	0.00107185	0.0103638	-0.945433
METTL7A	-0.694677	8.32448	-3.76169	0.00107222	0.0103638	-0.945765
OFD1	-0.59952	6.89995	-3.76014	0.00107627	0.0103939	-0.949344
STS	1.22524	8.4099	3.75924	0.00107861	0.0104039	-0.951414
ITPR1	0.709596	6.31242	3.75656	0.00108564	0.0104544	-0.957596
HOXB5	-0.778609	7.12484	-3.75491	0.00109001	0.0104792	-0.961417
PTGDS	0.622141	6.92148	3.75114	0.00110001	0.0105366	-0.970108
COLCA1	-0.630455	6.19108	-3.75113	0.00110005	0.0105366	-0.970138
RAB23	0.670148	6.18519	3.75006	0.0011029	0.0105596	-0.972602
TAGLN	1.08288	7.29462	3.74592	0.00111404	0.0106489	-0.982162
SNORD6	0.87693	7.44164	3.74566	0.00111475	0.0106494	-0.982766
KCNJ2	-0.780819	7.80329	-3.74539	0.00111548	0.0106494	-0.983391
DPYSL3	0.864711	7.34237	3.74368	0.00112011	0.0106627	-0.987334
COL14A1	0.784516	6.98161	3.74352	0.00112053	0.0106627	-0.98769
ABCA5	-0.902285	7.23956	-3.73902	0.00113283	0.0107369	-0.99807
GNG11	0.815947	6.8552	3.73898	0.00113294	0.0107369	-0.998165
TRIB2	1.00788	6.41473	3.73705	0.00113827	0.0107699	-1.00263
RHOJ	0.841866	6.99353	3.73623	0.00114051	0.0107867	-1.0045
OLFM1	0.631301	6.50636	3.7358	0.00114171	0.0107936	-1.0055
OTUB2	0.653227	6.33913	3.73388	0.00114704	0.0108261	-1.00993
FSCN1	0.65026	7.83543	3.73352	0.00114806	0.0108271	-1.01077
TGFB2	0.716501	5.37325	3.73171	0.00115309	0.0108616	-1.01493
EPHA2	1.05342	7.99294	3.72984	0.00115833	0.010889	-1.01924
ACVR1C	-0.826866	8.23733	-3.72856	0.00116192	0.0109095	-1.02219
CAV2	0.663442	6.84948	3.72452	0.00117337	0.0109993	-1.03151
ZNF57	-0.628625	8.02567	-3.72009	0.00118603	0.0110998	-1.04171
ZYX	0.724417	8.70281	3.72008	0.00118608	0.0110998	-1.04175
CXCL1	2.07351	8.23408	3.71611	0.00119753	0.0111673	-1.05089
KIRREL	0.842366	6.68866	3.71517	0.00120027	0.011184	-1.05306
CTSE	1.12131	10.1014	3.71172	0.00121034	0.0112591	-1.06101
C2	1.35604	7.11543	3.70907	0.00121812	0.0113051	-1.0671
CTGF	0.842062	8.55052	3.70256	0.00123749	0.011453	-1.08209
MAGI3	-0.600269	8.088	-3.70204	0.00123904	0.0114582	-1.08328
COX7B	-0.85999	7.33593	-3.70178	0.00123983	0.0114585	-1.08389
MSC	0.906089	6.09739	3.70067	0.00124316	0.0114735	-1.08644
CCDC3	1.18586	6.82571	3.69958	0.00124645	0.0114948	-1.08895
ANKRD20A12P	-0.604907	4.92199	-3.69898	0.00124826	0.0115022	-1.09032
GALNT12	-0.74538	9.45835	-3.69123	0.00127193	0.0116559	-1.10817
DOC2B	0.863238	6.86503	3.69088	0.00127301	0.0116612	-1.10898
METTL7B	-0.855513	8.56033	-3.69066	0.00127366	0.0116626	-1.10947
PRR15	-0.831891	9.87593	-3.68751	0.00128342	0.0117258	-1.11672
PRDX6	-0.846371	9.54683	-3.68703	0.0012849	0.0117333	-1.11782
SLC16A4	0.873763	5.56323	3.68657	0.00128635	0.0117419	-1.11889
ANKH	-0.682233	8.63494	-3.68383	0.0012949	0.0118014	-1.12518
ATP8A1	-0.672319	8.27335	-3.68299	0.00129756	0.0118211	-1.12713
GUCY1A3	1.04644	6.14094	3.68265	0.0012986	0.0118259	-1.12789
CREB3L3	-1.39245	6.77068	-3.68158	0.00130199	0.0118429	-1.13037
EDNRA	1.2743	6.23493	3.68054	0.00130525	0.011857	-1.13274
SLC41A1	0.794464	6.86066	3.67983	0.0013075	0.0118679	-1.13438
ANGPTL2	1.25677	7.42939	3.67789	0.00131366	0.011898	-1.13885
LINC01123	-0.68737	9.4329	-3.67551	0.00132125	0.0119575	-1.14432
OR51E2	0.908279	5.95951	3.67496	0.001323	0.0119662	-1.14558
RNU6-994P	0.643805	4.24226	3.67358	0.00132744	0.0119855	-1.14876
CLDN2	0.756361	5.53476	3.67275	0.0013301	0.0119923	-1.15066
CCDC14	-0.827789	7.48291	-3.67099	0.00133579	0.0120105	-1.15471
BEST4	-1.58484	8.15971	-3.6677	0.00134645	0.0120823	-1.16227
NPIPB6	-0.77962	9.23184	-3.66543	0.00135388	0.0121226	-1.16749
AMY2A	-0.676404	5.62879	-3.66538	0.00135401	0.0121226	-1.16758
IGFBP5	1.52505	8.24621	3.66253	0.0013634	0.0121688	-1.17415
FERMT2	0.900436	6.53441	3.65723	0.00138098	0.0122652	-1.18631
MT1E	-0.732527	9.59109	-3.65721	0.00138105	0.0122652	-1.18636
MTM1	-0.628225	7.91182	-3.65644	0.00138363	0.0122835	-1.18813
SELENBP1	-1.03338	11.3235	-3.65474	0.00138931	0.0123092	-1.19202
COL12A1	1.35343	6.91648	3.65045	0.00140381	0.0123918	-1.20188
SNORD116-24	0.913541	9.76759	3.65023	0.00140454	0.0123928	-1.20237
FAM3C	0.622373	8.23392	3.64904	0.00140858	0.0124058	-1.2051
PLA2G2A	1.36019	10.7553	3.64686	0.00141604	0.0124479	-1.21011
OSBPL8	0.591314	7.78479	3.64646	0.0014174	0.0124552	-1.21102
TIMP3	1.02194	7.78521	3.64437	0.00142459	0.0125091	-1.21583
MGC32805	-0.908192	4.47761	-3.64164	0.00143402	0.01256	-1.22209
APOL3	0.679065	6.07612	3.64141	0.00143482	0.01256	-1.22262
CHP2	-1.96554	8.66945	-3.64131	0.00143515	0.01256	-1.22284
FABP2	-1.45949	8.17742	-3.63928	0.00144224	0.0126021	-1.22751
LRRC31	-1.00204	7.22828	-3.63777	0.0014475	0.0126292	-1.23097
CLYBL	-0.851691	7.48926	-3.63746	0.00144858	0.0126339	-1.23168
DDC	-0.767034	7.88662	-3.63502	0.00145713	0.0126829	-1.23726
ANKRD20A3	-0.787708	6.1451	-3.63493	0.00145747	0.0126829	-1.23748
AKAP9	-0.70628	8.12672	-3.63304	0.00146413	0.0127266	-1.24181
PLLP	1.00755	8.80225	3.62904	0.00147836	0.0128217	-1.25099
ARFGAP3	0.735825	7.76922	3.62681	0.00148634	0.0128765	-1.2561
KCNN3	0.73292	6.37448	3.62575	0.00149015	0.0128952	-1.25853
THBS2	0.808182	6.41762	3.62455	0.00149445	0.0129036	-1.26126
FEZ1	0.747298	5.23093	3.62306	0.00149984	0.0129453	-1.26468
SPOCK2	0.781756	7.47414	3.62258	0.00150158	0.012946	-1.26578
BAG2	0.711969	6.33009	3.62139	0.00150592	0.0129642	-1.26852
SLC7A11	1.67039	6.90784	3.61959	0.00151246	0.013003	-1.27263
MT-TS2	-0.737384	11.4307	-3.61886	0.00151516	0.01301	-1.27432
ZAK	0.652445	5.98527	3.61763	0.00151963	0.0130339	-1.27711
GJA5	0.699572	4.99358	3.61387	0.0015335	0.0131104	-1.28573
IFITM3	0.962029	8.08787	3.61287	0.0015372	0.0131364	-1.28802
AGAP7P	-0.602974	7.99937	-3.60917	0.00155101	0.0132231	-1.2965
SATB2	-0.685807	10.9234	-3.60888	0.00155208	0.0132248	-1.29716
PRKAB2	-0.655218	7.80321	-3.60432	0.00156926	0.013337	-1.30759
MMRN1	1.30804	6.54622	3.60189	0.0015785	0.0133863	-1.31317
CDK20	-0.584241	5.98603	-3.60129	0.00158077	0.0133957	-1.31453
SPINK1	0.754479	9.93198	3.59855	0.00159127	0.0134602	-1.3208
RN7SL277P	0.595726	9.28643	3.59837	0.00159197	0.0134613	-1.32122
RNU4-62P	0.614637	8.74162	3.59813	0.00159287	0.013464	-1.32176
EMB	0.882439	6.83776	3.58811	0.00163185	0.013698	-1.34468
CXCL2	1.49045	6.31451	3.58001	0.00166404	0.0138672	-1.3632
CYYR1	0.90111	6.63945	3.57977	0.00166499	0.0138672	-1.36374
CCDC69	0.857098	6.76292	3.57961	0.00166562	0.0138672	-1.3641
ZSCAN31	-0.700042	5.49627	-3.57948	0.00166616	0.0138672	-1.36441
TMEM45A	0.777264	4.96562	3.57904	0.00166791	0.0138768	-1.3654
SNORA8	0.652971	8.14916	3.57846	0.00167026	0.0138906	-1.36674
ST3GAL5	0.653301	6.5522	3.56947	0.00170683	0.0141501	-1.38726
PCOLCE	1.00691	8.13723	3.56635	0.00171973	0.0142317	-1.39439
GPR116	0.81783	5.88991	3.56502	0.00172524	0.0142621	-1.39742
SCARNA6	0.701507	8.31198	3.56255	0.00173551	0.0143014	-1.40305
CLMP	0.720305	6.75038	3.55773	0.00175578	0.0144306	-1.41405
S1PR1	0.727828	5.3222	3.55452	0.00176942	0.0145192	-1.42138
TBXAS1	0.72679	7.59778	3.55293	0.00177622	0.0145596	-1.42501
PTP4A3	0.910473	7.4695	3.55192	0.00178051	0.0145794	-1.4273
SNORA38B	0.664827	10.5018	3.54831	0.00179607	0.0146388	-1.43554
CLCA4	-2.07649	11.0525	-3.5482	0.00179655	0.0146388	-1.43579
UGT2A3	-2.17229	6.94717	-3.54801	0.00179735	0.0146401	-1.43621
CXCL16	0.775646	8.07801	3.54534	0.00180896	0.0146987	-1.44231
MT-TK	-0.773786	10.3564	-3.54363	0.00181643	0.0147543	-1.44622
RNU1-67P	0.635019	9.35759	3.53979	0.00183326	0.0148393	-1.45495
ALPL	1.41407	6.66254	3.53821	0.00184028	0.0148871	-1.45857
COBL	-0.657482	7.53375	-3.53802	0.00184109	0.0148871	-1.45898
DDR2	0.852867	7.06328	3.53717	0.00184486	0.0149124	-1.46092
RNU5E-1	0.985021	8.68044	3.53565	0.00185162	0.0149412	-1.46439
VCAM1	1.39842	6.85363	3.53502	0.00185445	0.0149502	-1.46583
HNF1A-AS1	-1.55125	8.18613	-3.53309	0.00186308	0.0150025	-1.47023
TCEA3	-0.592425	9.09848	-3.53261	0.00186523	0.0150127	-1.47132
DENND5A	0.801672	6.97268	3.53241	0.00186611	0.0150127	-1.47177
CFB	1.50269	8.6669	3.531	0.00187246	0.0150364	-1.47498
BDH1	-0.635421	8.3238	-3.53066	0.001874	0.0150437	-1.47576
NOS2P3	0.633555	7.92983	3.5294	0.00187968	0.0150737	-1.47863
FXYD5	0.703968	7.89512	3.52881	0.00188234	0.0150898	-1.47996
SP110	0.794308	7.08573	3.52674	0.00189174	0.0151495	-1.48468
PRR5L	-0.650184	8.52703	-3.52541	0.00189781	0.0151825	-1.48771
TMEM47	0.777718	8.77017	3.52501	0.00189964	0.0151919	-1.48862
RSPO3	0.719277	5.76033	3.52309	0.0019084	0.0152359	-1.49298
SERPINA3	1.56848	6.5481	3.52205	0.00191319	0.015248	-1.49535
EGR2	0.630671	6.75563	3.52078	0.00191903	0.015284	-1.49824
NID2	0.722089	6.96583	3.52045	0.00192055	0.0152857	-1.49899
CYP2B6	-2.18693	7.86555	-3.51956	0.0019247	0.0153073	-1.50103
CHN2	-0.688809	8.22919	-3.51684	0.00193732	0.0153667	-1.50721
DYSF	0.935473	5.78074	3.5152	0.00194496	0.0153992	-1.51094
CYP4X1	1.1358	5.71234	3.51287	0.00195589	0.0154613	-1.51624
NFE2L3	0.754956	7.36082	3.51201	0.00195993	0.0154828	-1.51819
TMEM106A	0.609881	7.49776	3.51184	0.00196072	0.0154838	-1.51858
GABRP	1.21695	6.35215	3.51144	0.00196263	0.0154917	-1.5195
PTAFR	0.646202	6.73603	3.5097	0.00197084	0.0155374	-1.52345
CEBPB	0.641292	7.94384	3.50856	0.00197626	0.0155538	-1.52604
HSPB8	1.0247	5.70453	3.50521	0.0019922	0.0156568	-1.53365
RAB8B	0.781787	7.701	3.50278	0.00200386	0.0157285	-1.53917
WISP1	0.680914	6.28791	3.50033	0.00201571	0.0158003	-1.54475
MSN	1.07361	9.08394	3.49065	0.00206308	0.0160722	-1.56672
MS4A8	-1.03951	7.33027	-3.4906	0.00206334	0.0160722	-1.56683
SULF1	1.08901	6.87749	3.49036	0.00206456	0.016075	-1.56739
IL1A	1.35326	5.1846	3.48889	0.00207184	0.0161155	-1.57072
RNA5SP97	-0.649992	4.83748	-3.486	0.00208625	0.0161737	-1.57728
PHYH	-0.753367	7.7205	-3.48521	0.00209023	0.0161938	-1.57908
PLCD3	-0.612514	9.64898	-3.48112	0.00211082	0.0162583	-1.58835
APOBEC3C	0.583467	8.27918	3.48036	0.00211466	0.0162765	-1.59007
GXYLT2	-0.927593	7.0922	-3.48032	0.00211488	0.0162765	-1.59016
RNU6-560P	-0.620695	6.75802	-3.47955	0.00211879	0.0162879	-1.59191
EGR3	0.65573	5.88282	3.47774	0.002128	0.0163191	-1.59601
PCSK1	1.52732	6.57017	3.47608	0.00213649	0.0163779	-1.59978
SLC36A1	-0.915152	8.46243	-3.47419	0.00214624	0.016431	-1.60408
MIR196A1	-0.863658	7.3861	-3.47396	0.00214738	0.0164343	-1.60458
C2orf88	-0.767793	7.82445	-3.47277	0.00215355	0.0164545	-1.60729
SYT11	0.813186	6.03833	3.47126	0.00216135	0.0164871	-1.61071
SLC16A14	0.865943	7.07434	3.47024	0.00216662	0.0165057	-1.61301
DRAM1	1.29928	7.18914	3.47024	0.00216663	0.0165057	-1.61302
LOC100287497	-0.665154	6.56338	-3.46726	0.00218218	0.0165755	-1.61978
CNTFR	-1.232	7.46972	-3.46661	0.00218561	0.0165853	-1.62126
MOXD1	0.894785	5.60887	3.46589	0.00218937	0.016603	-1.62289
CDHR5	-0.674321	9.70156	-3.46511	0.00219347	0.0166233	-1.62466
OAS2	1.08329	7.05108	3.46237	0.00220792	0.0166874	-1.63086
SLC10A2	-0.89804	5.39648	-3.45799	0.00223123	0.0167986	-1.64078
PRKCDBP	0.611833	7.2194	3.45597	0.00224205	0.0168273	-1.64535
RNF144B	0.600677	6.79936	3.45548	0.0022447	0.0168414	-1.64647
CHRDL2	0.799313	6.09705	3.45213	0.00226279	0.016964	-1.65406
SLC38A5	0.715181	6.69632	3.44921	0.00227864	0.0170197	-1.66065
AIFM3	-0.692582	7.57904	-3.44666	0.00229263	0.0170967	-1.66643
WIPF1	0.92907	8.61144	3.44641	0.00229397	0.0171013	-1.66699
E2F5	0.642589	7.29363	3.44459	0.00230399	0.0171431	-1.6711
SEMA5A	-0.770563	8.92417	-3.44381	0.00230832	0.017165	-1.67287
CLDN1	1.5007	6.82061	3.4411	0.00232333	0.0172329	-1.679
SLC45A2	-0.659052	4.81712	-3.4408	0.00232504	0.0172329	-1.67969
SPARC	1.00728	10.0377	3.44059	0.00232618	0.0172329	-1.68016
MAOA	-0.941553	9.06348	-3.44005	0.0023292	0.0172481	-1.68138
FAM26E	0.673218	5.5304	3.43935	0.00233308	0.0172713	-1.68295
CCR4	0.729498	5.50171	3.43888	0.00233571	0.0172798	-1.68402
TIA1	-0.601525	8.54029	-3.43772	0.00234224	0.0173061	-1.68665
EBF1	0.914415	6.50411	3.43685	0.00234708	0.0173254	-1.6886
PLEKHG2	0.600425	6.95008	3.43228	0.00237294	0.0174433	-1.69895
APOBEC3A	-1.00512	7.06719	-3.42987	0.00238662	0.0175064	-1.70438
PPP1R18	0.69342	7.15348	3.42894	0.00239198	0.0175402	-1.7065
ATP8B2	0.583296	6.80657	3.42779	0.00239857	0.0175664	-1.70909
AKR1C2	-0.836777	6.97192	-3.42432	0.00241855	0.0176604	-1.71692
CD163L1	-0.773415	7.40043	-3.42357	0.0024229	0.0176724	-1.71862
SLC20A1	-0.992015	8.60223	-3.42221	0.00243077	0.0177226	-1.72169
HOXD12	0.713263	5.44323	3.42212	0.0024313	0.0177226	-1.72189
IL17RB	-0.644521	6.80167	-3.42056	0.0024404	0.0177578	-1.72542
CTSK	1.27237	8.09574	3.42051	0.00244071	0.0177578	-1.72553
SLC6A20	1.21801	6.92811	3.42008	0.0024432	0.0177704	-1.7265
PRKCH	0.735052	7.93087	3.41899	0.00244958	0.0177846	-1.72896
HOXB6	-0.654401	7.30952	-3.41879	0.00245077	0.0177866	-1.72942
ODC1	0.699014	9.62718	3.418	0.0024554	0.0178075	-1.7312
TAP1	0.812463	9.94908	3.41722	0.00245996	0.0178255	-1.73295
ACTA2	0.992635	9.85031	3.41701	0.00246123	0.0178292	-1.73344
ROCK1P1	-0.666908	4.66301	-3.41529	0.00247138	0.0178694	-1.73732
C4orf33	-0.599525	7.3547	-3.41389	0.00247966	0.017907	-1.74048
ADHFE1	-0.640493	5.49648	-3.41139	0.00249452	0.0179973	-1.74612
RNU5E-4P	0.647602	3.90601	3.41009	0.00250225	0.0180199	-1.74904
ETHE1	-0.595567	10.4136	-3.40799	0.00251489	0.0181053	-1.75379
IL2RB	0.818978	7.57403	3.40727	0.00251921	0.0181309	-1.75541
RNU4-2	1.57638	9.32764	3.4059	0.00252745	0.0181733	-1.75849
GPX8	0.844639	5.2687	3.40547	0.00253007	0.0181809	-1.75947
NOS2	2.18069	8.80454	3.40414	0.00253808	0.0182048	-1.76245
ACADSB	-0.607983	7.5643	-3.40262	0.00254733	0.0182487	-1.76589
RPS6KA2	0.658825	6.98051	3.40234	0.00254903	0.018255	-1.76651
SNORD14E	0.819131	6.93333	3.40134	0.00255517	0.0182712	-1.76879
RNU4ATAC16P	0.732362	5.71557	3.40047	0.00256049	0.0182867	-1.77075
SETD7	0.607275	8.44935	3.39898	0.00256959	0.0183357	-1.7741
THY1	1.27945	7.06422	3.39632	0.00258596	0.0184235	-1.78009
AK1	-0.618108	7.52362	-3.39124	0.00261751	0.0185687	-1.79152
ITGB3	0.704156	6.6084	3.38015	0.00268773	0.018916	-1.81649
VGLL3	0.780647	5.42654	3.3775	0.0027048	0.018999	-1.82246
SNORD116-8	0.813864	9.15346	3.37746	0.00270506	0.018999	-1.82255
SLC6A4	-0.697192	5.33695	-3.37497	0.00272115	0.0190718	-1.82814
TNC	1.55814	7.22238	3.37472	0.00272277	0.0190774	-1.8287
ZNF816-ZNF321P	-0.736302	6.38227	-3.37303	0.00273378	0.0191316	-1.83251
IFI44	0.667029	4.98011	3.37215	0.00273952	0.0191504	-1.83448
TESK2	-0.600582	7.58869	-3.37101	0.002747	0.019178	-1.83705
DUSP7	0.600494	9.12118	3.36954	0.00275663	0.0192222	-1.84035
RNF24	0.594471	7.1576	3.36658	0.0027762	0.0193297	-1.84702
RNU5A-8P	0.862381	4.92528	3.36632	0.00277791	0.0193301	-1.8476
FRY	0.613155	6.31705	3.36552	0.00278322	0.0193548	-1.8494
FLVCR1	-0.622873	7.39208	-3.36341	0.00279725	0.0194051	-1.85414
FAM57A	0.612104	8.22494	3.36334	0.00279767	0.0194051	-1.85428
FLVCR2	-0.732448	8.03524	-3.36267	0.00280216	0.0194234	-1.85579
PHGDH	0.746157	6.60014	3.36251	0.00280324	0.0194251	-1.85616
PDIA4	0.584645	9.98722	3.36123	0.00281181	0.0194672	-1.85903
CLK1	-0.650051	7.42352	-3.36076	0.00281494	0.0194831	-1.86008
C3	1.78658	8.98379	3.35817	0.00283242	0.019569	-1.86591
TNIP3	2.56895	6.35918	3.35812	0.00283271	0.019569	-1.86601
SLC7A5	1.20064	7.22914	3.35809	0.00283294	0.019569	-1.86609
AKT3	0.770807	6.62976	3.35737	0.00283781	0.0195948	-1.86771
RNF152	-1.05997	8.30688	-3.35517	0.00285275	0.019662	-1.87265
MPP6	0.586738	6.34034	3.35506	0.00285345	0.019662	-1.87288
SNORD116-3	0.762684	9.57686	3.35178	0.00287585	0.0197817	-1.88025
GPR183	1.00178	6.16134	3.35036	0.0028856	0.0198333	-1.88344
TMEM38B	-0.59077	7.1187	-3.35023	0.00288651	0.0198333	-1.88374
HAPLN3	0.904813	6.2108	3.34599	0.00291581	0.0199677	-1.89325
CYP3A5	-0.798945	7.97949	-3.34204	0.00294331	0.0200909	-1.90209
LEPREL1	0.773612	8.39773	3.33705	0.00297854	0.0202485	-1.9133
COL1A2	0.996971	8.48196	3.33631	0.00298375	0.0202613	-1.91494
C8orf4	0.881417	6.34782	3.33628	0.002984	0.0202613	-1.91502
CD44	0.831787	9.57176	3.33497	0.00299332	0.0202838	-1.91796
SLC9A7	0.804526	6.48709	3.33466	0.00299553	0.0202838	-1.91865
PDGFRB	0.889463	7.09553	3.33449	0.00299674	0.0202838	-1.91904
MME	0.992579	5.94049	3.33448	0.00299678	0.0202838	-1.91905
ENTPD1	1.01065	7.863	3.3309	0.0030224	0.020392	-1.92706
PLXND1	0.628827	7.199	3.32828	0.00304134	0.0204842	-1.93294
SFTPA2	0.794387	6.58533	3.32768	0.00304563	0.0204946	-1.93427
GDPD2	-0.828447	6.20835	-3.3273	0.00304841	0.0204963	-1.93513
TGFB1	0.788967	7.16941	3.32571	0.00305993	0.0205606	-1.93868
FER1L6	-0.743173	8.03309	-3.32562	0.00306063	0.0205606	-1.93889
GEM	0.908312	6.34218	3.3235	0.00307611	0.0206527	-1.94364
GLCCI1	0.897675	7.78722	3.32043	0.00309863	0.0207561	-1.95051
SNORA74A	0.650514	5.92666	3.31993	0.00310229	0.0207746	-1.95162
UNC5CL	0.612711	5.53544	3.31739	0.00312109	0.0208825	-1.95731
HOXB13	1.52351	8.52017	3.31507	0.00313838	0.0209561	-1.96251
SNORA21	0.798802	7.14609	3.31362	0.00314919	0.0210163	-1.96574
LYPD6B	0.704896	6.4804	3.31159	0.00316444	0.0210878	-1.97029
CALU	0.712818	8.10491	3.31135	0.00316622	0.0210937	-1.97082
MMP3	2.68414	6.11042	3.31044	0.00317307	0.0211326	-1.97285
FAM20A	0.608066	5.30795	3.30693	0.00319964	0.0212341	-1.9807
ANGPT2	0.727016	5.29144	3.30361	0.00322502	0.021339	-1.98813
CRISPLD2	0.797194	6.78276	3.30256	0.00323305	0.02137	-1.99047
ERG	0.689682	5.88716	3.30052	0.00324873	0.0214411	-1.99502
GPR39	-0.582198	8.16791	-3.29923	0.00325875	0.0214829	-1.99792
TRPM6	-1.62551	8.33684	-3.29682	0.00327741	0.0215875	-2.00329
WFDC2	0.774591	8.01312	3.29547	0.00328795	0.0216142	-2.00631
CXCL8	1.74981	6.57662	3.29507	0.00329104	0.0216156	-2.00719
CNTN3	-1.03481	6.09942	-3.29506	0.00329116	0.0216156	-2.00723
PAG1	-0.717056	8.73921	-3.29501	0.00329149	0.0216156	-2.00732
FMO5	-0.983056	8.66701	-3.29298	0.0033074	0.021687	-2.01185
LOC642947	-0.692067	5.67705	-3.28968	0.00333341	0.021833	-2.01922
PALMD	0.685899	5.55997	3.28823	0.00334492	0.0218776	-2.02246
LAMC1	0.819429	7.61136	3.28663	0.00335762	0.0219224	-2.02602
RBMS1	0.606695	7.07943	3.28642	0.0033593	0.0219224	-2.02649
PRO2012	-0.880027	7.01578	-3.28252	0.0033905	0.0220274	-2.03519
WWTR1	0.745523	7.26249	3.28041	0.00340751	0.0221194	-2.03989
RNU1-13P	0.658395	7.77807	3.27901	0.00341884	0.0221534	-2.04301
SLC10A5	-1.00261	8.2058	-3.27302	0.00346774	0.0223795	-2.05636
ELL2P1	0.790506	6.84021	3.27222	0.00347437	0.0223934	-2.05815
NBEAL1	-0.67998	8.27762	-3.27031	0.00349009	0.0224604	-2.0624
SRD5A3	0.918698	8.86992	3.26769	0.00351183	0.0225578	-2.06823
UBD	1.37041	6.24469	3.26506	0.00353379	0.0226489	-2.07409
FMNL1	0.613877	7.07519	3.26211	0.00355859	0.0227533	-2.08066
IL3RA	0.652754	6.13445	3.26155	0.00356329	0.0227533	-2.0819
IFNG	0.650976	4.27413	3.26043	0.00357277	0.0227759	-2.08439
CDH11	0.985435	7.68422	3.26039	0.00357314	0.0227759	-2.08449
CYP2C19	-0.907439	5.6243	-3.25877	0.00358689	0.022851	-2.0881
PMP22	0.710466	9.3175	3.25651	0.00360609	0.022942	-2.09312
TCP11L2	-0.66249	8.09964	-3.25612	0.00360945	0.022954	-2.09399
SNORA49	0.741801	7.98208	3.25548	0.00361492	0.022973	-2.09541
STAT1	0.815538	9.80646	3.25364	0.00363064	0.0230339	-2.09949
SAMD13	-0.70782	6.40034	-3.25192	0.00364545	0.0230886	-2.10331
NFKB2	0.635241	7.3339	3.25047	0.003658	0.0231332	-2.10654
SEMA4A	0.689988	6.9891	3.24947	0.00366672	0.023176	-2.10877
SCD	1.02993	9.17925	3.24849	0.00367517	0.0232103	-2.11094
SNORD116-6	1.1006	6.66994	3.24787	0.00368063	0.0232196	-2.11233
TIFA	0.67719	6.10076	3.24367	0.00371738	0.0233882	-2.12166
MTHFD2	0.634677	8.34454	3.24125	0.00373867	0.0234715	-2.12702
CD5	0.690261	7.0055	3.24007	0.00374916	0.0235152	-2.12965
CCL20	1.7452	7.39422	3.23745	0.00377246	0.0236021	-2.13547
MT-TH	-0.749711	11.3789	-3.23537	0.00379101	0.0236877	-2.14007
ABCA12	2.22709	5.66239	3.23199	0.00382142	0.0238113	-2.14757
EPHA3	0.60528	5.84493	3.23075	0.00383266	0.0238495	-2.15033
HEG1	1.07065	7.17006	3.23036	0.0038362	0.0238639	-2.15119
RNU6-570P	-1.01339	5.75587	-3.22964	0.00384276	0.0238804	-2.1528
ARHGAP15	0.842078	6.25351	3.22274	0.00390588	0.0242131	-2.16808
CXCL11	1.91844	5.88523	3.22254	0.00390771	0.0242131	-2.16853
S100A8	2.38912	6.2841	3.2186	0.00394425	0.024387	-2.17726
PIGZ	-0.882867	8.53767	-3.21828	0.0039473	0.024387	-2.17798
TNS1	0.83467	7.67687	3.21789	0.0039509	0.0244028	-2.17884
SNORD59B	-0.809466	5.91725	-3.21723	0.00395704	0.0244278	-2.18029
MB21D1	0.78365	6.19746	3.20984	0.00402671	0.0247595	-2.19666
PADI2	-1.38245	10.2895	-3.20699	0.00405389	0.0248401	-2.20297
RBMS3	0.631577	6.39931	3.20606	0.00406277	0.0248631	-2.20503
DUOX2	3.02216	8.95357	3.2056	0.0040672	0.0248707	-2.20605
LTBP2	0.767776	6.7853	3.20531	0.00406997	0.0248797	-2.20669
FBLN5	0.692126	7.17079	3.20166	0.00410519	0.0250241	-2.21476
FAM162A	-0.702599	8.19491	-3.201	0.00411154	0.0250432	-2.21621
PSORS1C3	-0.697997	4.88582	-3.19843	0.0041365	0.0251558	-2.22189
MT-TL2	-0.892366	10.8998	-3.19581	0.00416213	0.0252655	-2.22768
MIR8071-1	1.274	9.25104	3.19304	0.00418945	0.0254049	-2.23381
CWH43	-1.41919	7.85308	-3.19146	0.00420505	0.0254852	-2.23729
SNORD116-5	0.814934	8.88035	3.18726	0.00424687	0.0256247	-2.24657
MXRA5	1.33817	7.87485	3.18346	0.00428507	0.0257901	-2.25496
ZNF577	-0.608126	6.09608	-3.18058	0.00431423	0.0258987	-2.26131
BCL6	0.845611	6.56179	3.17601	0.0043609	0.0261078	-2.27139
ARHGDIB	0.954343	8.76832	3.1759	0.00436204	0.0261078	-2.27164
FAM129A	0.797391	6.32127	3.1758	0.0043631	0.0261078	-2.27186
IL7R	1.18115	7.24365	3.17425	0.00437907	0.0261666	-2.27529
NIPAL1	-0.655044	8.88408	-3.16961	0.0044271	0.0263927	-2.28551
AQP9	2.08614	5.67802	3.16318	0.00449461	0.0266928	-2.29968
ST3GAL1	1.13227	7.13413	3.16253	0.0045014	0.0267195	-2.30109
TRANK1	-0.603763	8.51873	-3.16164	0.00451083	0.0267596	-2.30305
IGHV3-74	0.939497	11.7035	3.16099	0.00451774	0.0267727	-2.30448
TCF4	0.900672	8.28327	3.15671	0.00456342	0.0269387	-2.3139
B3GNT7	1.13105	9.24271	3.15017	0.00463418	0.0272233	-2.3283
IL21R	0.725699	6.08705	3.14925	0.00464411	0.0272473	-2.33031
P2RY8	1.05108	6.20665	3.14838	0.0046536	0.0272824	-2.33222
FKBP10	0.701737	7.15233	3.14822	0.0046554	0.0272861	-2.33258
TMEM71	0.663388	5.25357	3.14709	0.00466774	0.0273447	-2.33506
SLCO4A1	0.732004	6.75778	3.14557	0.00468449	0.0274215	-2.33841
KIAA0040	0.628337	7.88977	3.14542	0.00468614	0.0274215	-2.33874
APOBEC3G	0.817597	6.09599	3.14394	0.0047024	0.0274879	-2.34198
QKI	0.63428	6.71529	3.14131	0.00473152	0.0276211	-2.34775
FLT1	0.870735	6.28002	3.14088	0.00473636	0.0276424	-2.34871
SLC2A3	1.05843	6.89795	3.13778	0.00477096	0.0277674	-2.35552
CALCRL	0.972588	6.25553	3.13717	0.00477779	0.0277702	-2.35686
LGALS1	0.615502	9.5101	3.13692	0.00478054	0.027775	-2.3574
PDCD4	-0.770086	9.77865	-3.13655	0.00478469	0.0277922	-2.35821
ZNF737	-0.613548	8.81415	-3.13606	0.00479018	0.0277935	-2.35928
ZC3H12A	0.987867	8.18188	3.13456	0.00480709	0.0278667	-2.36258
SERPING1	1.03917	8.37046	3.13055	0.00485252	0.0280673	-2.37137
GPR137B	0.588681	8.26335	3.12877	0.00487282	0.0281568	-2.37528
MMP7	2.42888	5.69811	3.12825	0.00487881	0.0281774	-2.37643
SCN9A	-0.856755	5.8535	-3.12685	0.0048948	0.0282488	-2.37949
SH2D7	-0.595764	5.46247	-3.124	0.00492765	0.0283471	-2.38574
JAM3	0.603367	6.52114	3.12233	0.00494698	0.0284132	-2.3894
PTPN13	0.669055	5.65703	3.12047	0.00496866	0.0285126	-2.39349
GLDN	1.44501	7.04196	3.11981	0.00497627	0.0285282	-2.39492
RILPL2	0.621593	6.53551	3.11753	0.00500296	0.028653	-2.39992
SH3PXD2B	0.638003	7.23469	3.11519	0.00503043	0.0287467	-2.40504
PIM2	1.52391	8.04889	3.1132	0.00505397	0.0288459	-2.4094
SNX10	0.861648	6.45561	3.11282	0.00505846	0.0288644	-2.41023
PECAM1	1.13531	8.87469	3.11259	0.00506117	0.0288728	-2.41073
SEC14L1	0.640879	7.74601	3.11122	0.00507749	0.0289305	-2.41374
EYA2	-0.615037	6.74223	-3.11091	0.00508117	0.0289392	-2.41442
CHST11	0.85483	8.05982	3.10841	0.00511099	0.0290787	-2.41989
EPHX2	-0.896673	7.61379	-3.10575	0.00514289	0.0292175	-2.4257
CD79A	1.73171	8.80388	3.10558	0.005145	0.0292223	-2.42608
ABI3BP	0.947157	7.92329	3.10147	0.00519476	0.0294071	-2.43508
NXPE4	-0.738274	10.6471	-3.09884	0.00522682	0.0295043	-2.44082
AKR1C3	-0.768201	7.98772	-3.09837	0.00523258	0.0295151	-2.44185
CXCR5	1.12775	5.91024	3.09821	0.00523454	0.0295151	-2.4422
MT1DP	-0.620796	8.69808	-3.09717	0.00524719	0.0295578	-2.44445
SMOX	0.585541	6.40632	3.09625	0.00525858	0.0296005	-2.44648
TFPI2	0.877224	4.64971	3.09493	0.00527479	0.0296631	-2.44935
ASS1	0.719553	9.38174	3.09291	0.0052998	0.0297391	-2.45377
NT5DC3	0.66893	7.08358	3.09109	0.00532243	0.0298317	-2.45775
WDR52	-0.670846	6.31164	-3.09096	0.00532398	0.0298317	-2.45802
SELP	1.28753	5.84003	3.0905	0.00532977	0.0298543	-2.45904
BNC2	0.614687	6.21422	3.0859	0.00538732	0.0300782	-2.46907
CD93	0.875309	7.37882	3.0839	0.00541261	0.0301832	-2.47344
HOXD13	1.18663	7.27439	3.07911	0.00547348	0.0304352	-2.48388
TUSC3	0.823561	7.10669	3.07837	0.00548296	0.0304661	-2.48549
SEMA6A	-0.659759	9.20425	-3.07544	0.00552066	0.0305944	-2.49189
IRAK3	1.1863	6.51322	3.07371	0.00554291	0.0306826	-2.49564
TNFAIP6	1.47317	5.19231	3.07147	0.00557209	0.0307925	-2.50054
FFAR2	0.918674	5.40851	3.06907	0.00560328	0.0309023	-2.50575
SNORD116-13	0.714954	3.9125	3.06906	0.0056035	0.0309023	-2.50579
MCOLN2	-0.939844	7.96965	-3.06735	0.00562586	0.0309502	-2.5095
MFAP4	0.784726	7.61122	3.06401	0.00566992	0.0311045	-2.51678
TMTC1	0.890699	5.90286	3.06058	0.00571536	0.0312874	-2.52422
2023-09-06	0.821207	7.6164	3.05747	0.00575698	0.0314382	-2.53099
DEPDC7	-0.593655	5.94148	-3.05742	0.00575774	0.0314382	-2.53111
OASL	-0.688411	6.69642	-3.05447	0.00579736	0.0316101	-2.53751
EPC1	0.822434	9.7651	3.05134	0.0058398	0.0317969	-2.54431
TNFAIP8	0.652389	6.5846	3.04806	0.00588465	0.0319534	-2.55144
ADAM19	0.918127	7.46496	3.04804	0.005885	0.0319534	-2.5515
SNORA24	0.804299	9.63111	3.04713	0.00589747	0.0319988	-2.55347
NXPE1	-0.73456	10.7572	-3.04511	0.00592523	0.0321344	-2.55785
OSMR	1.33871	6.90248	3.04419	0.00593795	0.0321884	-2.55985
CRYAB	0.977041	6.4268	3.04013	0.00599433	0.0324261	-2.56866
KLK1	-0.619218	9.06465	-3.03896	0.00601074	0.0324772	-2.5712
RASSF5	0.806698	7.38815	3.03824	0.00602083	0.0325142	-2.57277
EHD3	0.741217	6.70785	3.03581	0.00605494	0.0326178	-2.57803
SLC39A5	-0.818569	9.49024	-3.03539	0.00606086	0.0326371	-2.57894
OAS1	-0.592098	9.72484	-3.03494	0.00606724	0.0326613	-2.57992
TRHDE	-1.05903	5.69681	-3.03299	0.00609474	0.0327681	-2.58413
CD3D	0.644619	6.98214	3.03161	0.00611432	0.0328465	-2.58712
TRPS1	0.738837	6.22114	3.03086	0.00612504	0.0328965	-2.58875
MMP1	2.2943	6.88216	3.02782	0.00616848	0.0330689	-2.59534
ISLR	0.770045	6.83173	3.02611	0.00619311	0.0331474	-2.59905
SAA2-SAA4	0.941848	4.76055	3.02551	0.00620174	0.0331632	-2.60035
TTPA	-0.603893	6.48104	-3.0247	0.0062134	0.0332027	-2.6021
ANKRD20A8P	-0.609091	6.15164	-3.02395	0.00622431	0.0332306	-2.60373
IDO1	2.41392	6.39153	3.01992	0.0062829	0.033459	-2.61245
TNFSF13B	0.783845	6.68807	3.019	0.00629628	0.0335226	-2.61444
TCN1	1.84995	5.66662	3.01822	0.00630774	0.0335607	-2.61613
DUOXA2	2.54718	7.7082	3.0142	0.00636695	0.0337567	-2.62483
CHAC1	0.75993	6.64846	3.01415	0.00636757	0.0337567	-2.62492
MT1H	-1.09908	8.85066	-3.01313	0.00638267	0.0338203	-2.62712
AAED1	0.583797	6.87529	3.01218	0.00639681	0.0338645	-2.62918
PIK3R3	0.606565	7.30337	3.00879	0.00644738	0.0340857	-2.63651
FAM171B	0.626684	7.08693	3.0076	0.00646528	0.0341439	-2.63909
EFNA1	-0.9757	7.56021	-3.00732	0.0064694	0.0341479	-2.63969
CSF2RB	0.946014	7.51847	3.00537	0.00649874	0.0342485	-2.6439
GYG2	0.652141	6.58009	3.00424	0.00651589	0.0343144	-2.64635
GZMK	1.17367	5.99791	3.00216	0.00654732	0.0344323	-2.65083
RAB34	0.58264	6.41362	3.00209	0.00654839	0.0344323	-2.65098
IFITM2	0.836088	8.06619	3.00163	0.00655535	0.0344611	-2.65197
COL6A1	0.59669	8.56872	2.99846	0.0066038	0.0346532	-2.65882
RNU1-11P	0.63024	9.40234	2.99826	0.00660685	0.0346614	-2.65925
SLAMF1	0.869917	5.39017	2.99658	0.00663261	0.0347028	-2.66287
CST7	0.694469	7.68576	2.99317	0.00668528	0.0349079	-2.67023
MYL9	0.636543	8.58391	2.98907	0.00674919	0.0351864	-2.67907
SNORD15B	0.742534	7.83394	2.98869	0.00675505	0.0352091	-2.67988
ALDH1A2	0.829486	5.61518	2.98553	0.00680466	0.0353999	-2.68668
CARD11	0.684276	6.34295	2.98538	0.00680713	0.0354013	-2.68702
CD74	0.726174	11.5831	2.98359	0.00683537	0.0355165	-2.69087
CES3	-0.647117	8.9682	-2.98208	0.00685933	0.0355933	-2.69412
INHBA	0.934448	5.81568	2.98187	0.00686266	0.0355933	-2.69458
COL6A3	1.04485	7.5843	2.97369	0.00699375	0.0360895	-2.71216
SNORD116-2	0.775896	6.27199	2.97345	0.00699765	0.0360941	-2.71268
UGT2B10	-0.76723	5.55206	-2.97308	0.00700376	0.0361105	-2.71349
TNFRSF12A	0.630407	8.68172	2.97223	0.00701749	0.0361418	-2.71531
CHI3L1	2.32111	6.77071	2.97183	0.0070239	0.0361577	-2.71616
ICAM1	1.23503	7.61953	2.97147	0.00702984	0.0361721	-2.71695
CDK14	0.712778	6.40982	2.97037	0.00704774	0.0362322	-2.71931
NPIPB9	-0.633089	9.19175	-2.96985	0.00705619	0.0362676	-2.72042
LDLR	0.647711	9.79221	2.96871	0.00707487	0.0363316	-2.72288
AREG	1.01947	7.65311	2.96849	0.00707847	0.0363341	-2.72335
ANXA6	0.839905	9.14454	2.96072	0.0072068	0.0367902	-2.74004
TM6SF2	-0.814171	7.1704	-2.96038	0.00721245	0.036811	-2.74077
LYN	0.823742	8.92554	2.95849	0.00724396	0.0369475	-2.74482
ENG	0.885062	8.58559	2.95737	0.00726277	0.0370085	-2.74723
ABCD2	0.5999	5.44221	2.95711	0.0072671	0.0370088	-2.74778
PTPRM	0.591907	7.10236	2.95691	0.00727042	0.0370177	-2.74821
CTSV	-0.592363	5.2779	-2.95649	0.00727747	0.0370428	-2.74911
GLP2R	-0.635934	5.9996	-2.95603	0.00728532	0.037045	-2.75011
SLC15A3	0.649879	6.95564	2.95338	0.00733003	0.0372054	-2.75579
TM4SF18	0.871982	6.05046	2.9533	0.00733134	0.0372054	-2.75596
HEPACAM2	-0.954179	9.52121	-2.95301	0.00733628	0.0372148	-2.75658
ADH1C	-1.32637	10.4425	-2.95206	0.00735244	0.037273	-2.75862
IGFBP7	0.743277	9.80169	2.95128	0.00736563	0.0373182	-2.76029
LRP8	0.729408	7.09101	2.95124	0.00736628	0.0373182	-2.76037
SLC4A4	-0.810843	10.4464	-2.95029	0.00738244	0.0373757	-2.7624
CCL2	1.50976	8.18186	2.94984	0.0073901	0.0373982	-2.76337
RNY3P2	0.677141	5.54808	2.94607	0.0074548	0.0375463	-2.77146
SNORD116-20	0.657527	10.5609	2.94563	0.00746234	0.037568	-2.7724
RN7SKP35	-0.731635	5.73769	-2.94539	0.00746641	0.0375804	-2.7729
SLC22A4	-0.726662	6.17072	-2.94235	0.00751895	0.0377796	-2.77941
C11orf53	-0.64314	5.66163	-2.93988	0.00756191	0.0379381	-2.7847
ARNTL2	0.92411	6.44878	2.93302	0.00768258	0.0383783	-2.79939
AOAH	-0.631492	8.29689	-2.93118	0.0077151	0.038483	-2.80331
IGHV4-59	1.1835	11.4221	2.92942	0.00774649	0.0385983	-2.80707
SERPINB9	1.06322	7.93615	2.92793	0.00777313	0.0386979	-2.81026
CR1L	0.645056	4.30309	2.92575	0.00781224	0.0388346	-2.81491
SELE	1.39343	5.40923	2.92466	0.00783192	0.0388992	-2.81724
NNMT	0.942006	7.23223	2.92205	0.0078791	0.0390544	-2.82281
CA4	-0.880093	9.64174	-2.92066	0.00790434	0.0391421	-2.82578
HLA-DMA	0.877072	9.44622	2.9203	0.00791099	0.0391501	-2.82656
NFKBIZ	0.83235	8.27031	2.91986	0.00791886	0.0391807	-2.82748
PRELP	0.645226	6.6471	2.91742	0.00796354	0.0393183	-2.8327
RIPK2	0.627676	6.99784	2.91538	0.00800102	0.0394365	-2.83705
FLNC	0.713357	7.05133	2.91482	0.00801134	0.0394707	-2.83824
FCGRT	-0.580258	9.07833	-2.91438	0.00801941	0.0394937	-2.83918
FBXO16	0.585137	5.5192	2.91411	0.00802446	0.0395103	-2.83976
TEK	0.646893	6.12465	2.91356	0.00803466	0.0395438	-2.84094
LOXL2	0.889578	7.26772	2.90808	0.00813648	0.0398632	-2.85261
TNFSF8	0.807605	6.74478	2.90655	0.00816522	0.0399249	-2.85587
C1R	0.967084	8.31414	2.90583	0.00817868	0.0399824	-2.8574
P2RY14	0.684797	6.9241	2.90388	0.00821536	0.0401196	-2.86155
CECR1	0.797899	7.57943	2.90113	0.00826752	0.0402815	-2.86741
SNORD82	0.80183	6.67728	2.90067	0.00827626	0.0403072	-2.86839
SYTL2	-0.753972	8.68564	-2.89883	0.0083112	0.0404344	-2.87229
PRDM1	1.12134	8.44887	2.8974	0.0083387	0.0405181	-2.87535
RGS7BP	0.610675	5.33329	2.8968	0.00835006	0.0405565	-2.87661
IGHV1OR15-1	1.99616	8.32589	2.89634	0.00835888	0.040573	-2.87759
KDR	0.920013	6.75028	2.89626	0.00836044	0.040573	-2.87776
SPARCL1	0.856541	8.0165	2.89502	0.00838428	0.0406633	-2.8804
MMP9	1.47957	7.6127	2.89209	0.00844091	0.0408769	-2.88663
PDPN	0.783707	6.21287	2.89194	0.00844384	0.0408769	-2.88695
TIGIT	0.656849	5.68033	2.89192	0.0084441	0.0408769	-2.88698
MT1A	-0.64778	9.04304	-2.88851	0.00851045	0.041108	-2.89423
ITGA2	0.662055	8.80585	2.88301	0.00861867	0.0415064	-2.90593
PRKXP1	-0.926529	5.53471	-2.87955	0.00868718	0.0417242	-2.91325
PLAU	1.03909	7.2621	2.87863	0.00870562	0.0417837	-2.91521
HPGDS	-0.970012	6.44289	-2.87839	0.00871032	0.0417837	-2.91571
WARS	1.10444	8.87877	2.87719	0.00873425	0.0418586	-2.91825
LSAMP	0.719085	6.05326	2.87483	0.00878178	0.0420055	-2.92327
GP1BA	0.661136	5.434	2.86946	0.00889032	0.0423768	-2.93464
PIK3AP1	0.649541	7.85214	2.86723	0.00893582	0.0425154	-2.93936
LRRK2	0.838843	4.96128	2.86666	0.0089476	0.0425367	-2.94058
CCL22	0.758219	6.55519	2.86295	0.00902386	0.0428293	-2.94843
SERPINE1	1.09408	6.27089	2.86005	0.00908387	0.043016	-2.95455
FPR2	1.12557	4.69538	2.86001	0.00908482	0.043016	-2.95465
FOS	1.32447	8.30685	2.85975	0.00909008	0.043016	-2.95519
PREX1	0.670399	7.43397	2.85963	0.00909272	0.043016	-2.95546
RASGRP1	0.848485	6.70688	2.85947	0.00909595	0.0430225	-2.95578
EDN3	-0.663924	8.61979	-2.85831	0.00912022	0.0431111	-2.95825
PLIN2	-0.733531	7.7542	-2.85567	0.00917538	0.0433191	-2.96382
KLHL5	0.993248	6.17976	2.8548	0.00919375	0.0433795	-2.96567
APOL1	1.10089	7.27772	2.85394	0.00921169	0.0434312	-2.96747
C4BPB	0.847171	5.21655	2.85156	0.00926202	0.043563	-2.97251
RNA5SP295	-0.689885	4.88095	-2.84863	0.00932426	0.0437648	-2.9787
OLFML2B	0.720673	5.66207	2.84769	0.00934417	0.0438235	-2.98067
SRM	0.582517	9.15497	2.84688	0.00936148	0.0438758	-2.98238
CXCL17	0.587884	5.62104	2.84607	0.00937901	0.0439245	-2.98411
P2RY10	0.993285	6.07433	2.844	0.00942339	0.0440174	-2.98847
GFPT2	0.656925	5.3905	2.84359	0.00943221	0.0440475	-2.98933
ITGAL	0.794648	7.07605	2.84283	0.00944863	0.0440985	-2.99094
TSPAN11	0.701561	7.34055	2.83773	0.00955931	0.0445273	-3.00169
FADS2	1.44911	7.73297	2.83456	0.0096287	0.0447343	-3.00837
GSDMB	-0.61248	8.58191	-2.83004	0.00972844	0.0450804	-3.01789
ETS1	0.641618	8.09516	2.82986	0.00973243	0.0450814	-3.01827
PMAIP1	0.736921	6.414	2.82968	0.00973644	0.0450821	-3.01865
ENPP2	1.01699	8.31921	2.82769	0.00978072	0.0451973	-3.02283
DNAJB9	0.621402	7.55849	2.82572	0.00982463	0.0453462	-3.02697
PTPRCAP	0.680236	8.24957	2.82276	0.00989119	0.0455182	-3.0332
RHOH	1.097	6.87152	2.82206	0.00990685	0.0455556	-3.03466
FAIM3	1.03671	7.12104	2.82098	0.00993132	0.0456308	-3.03694
RN7SL842P	0.602263	6.11428	2.82052	0.00994171	0.0456516	-3.0379
LGI2	0.730798	5.74401	2.81823	0.00999366	0.0458179	-3.04271
CHI3L2	1.06577	5.15558	2.81521	0.0100626	0.0460074	-3.04906
IGKV2D-40	2.45247	5.58839	2.81486	0.0100708	0.046019	-3.0498
ORAI2	0.924991	7.40196	2.81345	0.0101031	0.0460838	-3.05276
LAMP3	0.895425	6.85647	2.81298	0.0101139	0.0461242	-3.05375
RNU6-199P	-0.612259	4.72677	-2.81188	0.0101393	0.0462127	-3.05605
IFIT3	0.604142	6.12596	2.81124	0.010154	0.0462597	-3.0574
SCARNA5	0.588837	8.34147	2.81075	0.0101655	0.0462751	-3.05843
RFTN1	0.767989	6.99018	2.80907	0.0102042	0.0463997	-3.06194
PLA2G2D	0.819205	7.37958	2.80687	0.0102554	0.0465691	-3.06656
GIMAP1-GIMAP5	0.691434	7.34813	2.80438	0.0103138	0.0467339	-3.07179
MT1G	-0.982404	11.6564	-2.80353	0.0103336	0.046808	-3.07357
RGS5	1.23867	7.64147	2.80343	0.010336	0.046808	-3.07378
KYNU	1.55933	5.71392	2.80157	0.0103799	0.0469421	-3.07768
AGPAT4	0.637087	5.91756	2.80132	0.0103857	0.0469501	-3.07819
TRIM31	-0.866894	8.84114	-2.80045	0.0104063	0.0470162	-3.08003
SLC6A6	0.830598	7.24878	2.79917	0.0104365	0.0470976	-3.08269
LDHD	-0.6243	8.16127	-2.7965	0.0105	0.0473202	-3.08829
OTC	-0.772004	5.06181	-2.79626	0.0105057	0.0473313	-3.08879
IGHV3-52	0.700076	12.9821	2.79011	0.0106535	0.0477533	-3.10166
GPR125	-0.691803	8.19324	-2.78944	0.0106697	0.047789	-3.10306
FBN1	0.83802	6.53404	2.78564	0.0107622	0.0480739	-3.11101
HRCT1	-0.657299	7.45991	-2.78124	0.0108701	0.0484062	-3.1202
SACS	0.649277	5.5414	2.78117	0.0108719	0.0484062	-3.12035
MEDAG	0.860836	5.68579	2.77976	0.0109067	0.0484904	-3.12329
NPSR1	0.674468	5.18526	2.77795	0.0109514	0.0486553	-3.12706
ELTD1	1.02167	6.2181	2.77669	0.0109828	0.0487416	-3.12969
IGHV3OR16-7	0.97309	10.9121	2.77524	0.011019	0.0488281	-3.13272
STX19	-0.588366	7.66985	-2.76953	0.0111625	0.0493035	-3.14464
MASP1	0.595129	5.44906	2.76949	0.0111636	0.0493035	-3.14472
VIPR1	-0.80966	8.98927	-2.76836	0.0111921	0.0494166	-3.14707
ST3GAL4	0.770801	8.0205	2.76388	0.0113062	0.0497226	-3.15641
DDX60L	-0.599916	7.73575	-2.76266	0.0113375	0.0498226	-3.15895
FMNL3	0.647878	6.6263	2.75847	0.0114454	0.0501523	-3.16766
PRAC1	0.847051	6.76107	2.75841	0.011447	0.0501523	-3.16779
ZNF204P	-0.743083	5.38805	-2.75816	0.0114535	0.0501659	-3.16831
CR1	1.22292	5.51322	2.75812	0.0114545	0.0501659	-3.16839
DHRS9	-0.754869	8.77402	-2.75796	0.0114587	0.0501659	-3.16873
SPG20	0.594968	5.77056	2.75392	0.0115638	0.0505313	-3.17713
IFITM1	0.688799	9.72248	2.75272	0.011595	0.0506297	-3.17961
PLA2R1	-0.629905	6.80271	-2.75246	0.011602	0.0506504	-3.18015
CEMIP	1.07928	6.02557	2.75147	0.0116279	0.0507353	-3.18221
HSPA13	0.627519	7.29038	2.74812	0.0117164	0.0509685	-3.18918
VSIG1	1.59948	5.38863	2.74362	0.0118359	0.0512492	-3.1985
NID1	0.847135	7.21138	2.74133	0.0118972	0.0514385	-3.20326
IGHV3-43	0.624909	12.512	2.74112	0.011903	0.0514441	-3.2037
SERPINB7	1.46075	4.74098	2.74021	0.0119275	0.0515122	-3.20559
CYP4F2	-0.952469	6.76236	-2.73842	0.0119757	0.0516628	-3.2093
FPR1	0.965974	5.68551	2.73765	0.0119966	0.0517125	-3.2109
ROBO1	0.958478	7.18733	2.73618	0.0120365	0.0518099	-3.21395
XPNPEP2	-1.287	7.21263	-2.73421	0.01209	0.0519519	-3.21802
IRF4	0.963588	7.52288	2.73405	0.0120943	0.051953	-3.21835
PLN	0.696445	5.18623	2.73358	0.0121072	0.0519892	-3.21932
IGHV3-35	0.659425	9.83043	2.73319	0.0121179	0.0520161	-3.22014
CD69	0.82791	5.80486	2.73232	0.0121417	0.0520509	-3.22194
LAMA4	0.606768	7.23619	2.72992	0.0122075	0.0522274	-3.2269
SNORA38	0.691095	6.72079	2.72811	0.0122575	0.0523743	-3.23066
CSF3R	0.903864	5.8527	2.72359	0.0123828	0.0527645	-3.24
RN7SL706P	-0.780678	5.04723	-2.72227	0.0124196	0.0528632	-3.24272
LRRN2	-0.627835	6.75084	-2.72087	0.0124589	0.0529821	-3.24562
JAK3	0.764069	6.5109	2.71726	0.0125607	0.0532984	-3.25309
PRPS1	0.639963	7.00621	2.71562	0.012607	0.0534362	-3.25646
S100A9	1.06152	6.61404	2.71307	0.0126794	0.0536557	-3.26172
MX2	0.815374	6.37125	2.7095	0.0127816	0.0539901	-3.26909
MCTP1	0.669564	6.32062	2.70635	0.0128725	0.0542253	-3.27559
IGHV3-7	0.609926	12.9138	2.7048	0.0129176	0.0543475	-3.27879
TMEM72	-0.69291	7.89414	-2.70391	0.0129434	0.0544038	-3.28062
BCL2A1	0.941887	6.10288	2.70346	0.0129566	0.0544321	-3.28155
CXCR1	1.38925	5.26855	2.70036	0.0130471	0.0546753	-3.28794
CD3G	0.622331	7.45401	2.69759	0.0131283	0.0548675	-3.29362
TNFRSF9	1.18355	6.22443	2.69742	0.0131335	0.0548767	-3.29399
ANXA5	0.621269	9.46783	2.69662	0.0131571	0.0549191	-3.29564
TMEM154	0.73122	6.93808	2.69415	0.0132301	0.0551644	-3.30071
HLA-DRB1	0.680077	10.0769	2.69235	0.0132838	0.0553125	-3.30442
IER3	0.650329	8.81168	2.69192	0.0132966	0.0553429	-3.3053
FAM126A	0.647232	5.70696	2.68571	0.0134829	0.0559384	-3.31805
EXPH5	-0.92981	8.41138	-2.68514	0.0135001	0.05596	-3.31922
KCNJ15	0.906332	5.14919	2.68475	0.013512	0.0559894	-3.32003
HLA-DQB1	0.776255	7.87832	2.68408	0.0135325	0.0560643	-3.32141
KIT	0.806314	7.05394	2.68104	0.0136248	0.0563805	-3.32764
ZG16	-0.761989	10.8248	-2.68061	0.0136379	0.0564207	-3.32852
MGP	1.09497	6.3794	2.67954	0.0136707	0.0565062	-3.33072
SLC43A3	0.816302	7.83796	2.66643	0.0140777	0.0577177	-3.35758
MAP4K1	0.641702	6.24737	2.66534	0.0141122	0.0577674	-3.35981
SYNPO2	0.839673	7.63812	2.66525	0.0141152	0.0577695	-3.36
KIAA0922	0.81663	6.83378	2.66333	0.0141759	0.0579365	-3.36393
LEF1	0.71908	6.23428	2.66127	0.0142412	0.0581426	-3.36814
IGKV1D-8	0.95018	6.24658	2.65812	0.0143417	0.0584253	-3.37457
TPK1	0.657796	6.32122	2.6568	0.0143841	0.0585208	-3.37727
FDCSP	1.75291	6.53941	2.65334	0.0144957	0.0588227	-3.38433
GIMAP4	0.735793	6.43665	2.64816	0.014664	0.0592666	-3.39489
SPNS2	0.720568	8.01795	2.64623	0.0147276	0.059482	-3.39884
FKBP11	0.587773	7.12312	2.64597	0.0147359	0.0595055	-3.39936
FAM65B	1.01368	6.12126	2.64345	0.014819	0.0597683	-3.4045
FCRLA	0.74896	5.37067	2.64247	0.0148513	0.0598781	-3.40649
CCDC80	0.834683	6.84705	2.64074	0.0149088	0.0600681	-3.41002
FADS1	1.09128	6.68239	2.63968	0.0149442	0.0601632	-3.41219
GPR65	0.765409	5.83221	2.63965	0.0149453	0.0601632	-3.41225
TSPAN7	-0.789969	10.1456	-2.6394	0.0149535	0.0601749	-3.41275
CD274	1.08629	5.59362	2.63867	0.0149779	0.0602114	-3.41425
STX11	1.01051	7.35277	2.63841	0.0149866	0.0602255	-3.41477
LOC100506990	-0.648332	6.90451	-2.63686	0.0150382	0.0603791	-3.41791
IGHV5-78	0.893196	7.2315	2.63478	0.0151083	0.0605683	-3.42216
CLEC6A	0.903901	4.52427	2.63341	0.0151544	0.0606488	-3.42494
MMP10	1.14013	5.00748	2.63276	0.0151763	0.0607259	-3.42626
CXCR2	0.958512	4.84496	2.63259	0.0151821	0.0607389	-3.42661
MT1JP	-0.638083	7.17329	-2.62807	0.0153355	0.0611229	-3.43579
BEST2	-0.935334	8.20905	-2.62791	0.0153411	0.0611229	-3.43612
MT1P3	-0.669431	8.17875	-2.62756	0.0153529	0.0611493	-3.43683
SNORA68	0.741913	10.8901	2.62736	0.0153597	0.0611521	-3.43723
VNN2	1.32787	5.26295	2.62678	0.0153795	0.0611521	-3.43841
BASP1	0.645764	8.63562	2.62307	0.015507	0.0614851	-3.44594
ALDH1L2	0.649313	5.69818	2.62118	0.0155724	0.0616559	-3.44978
VTRNA1-1	1.01855	4.77912	2.62031	0.0156023	0.0617312	-3.45154
ART3	0.599887	4.58098	2.61971	0.0156234	0.061785	-3.45277
NXPE3	0.770023	5.91193	2.61912	0.015644	0.0618434	-3.45397
MAB21L3	-0.768183	7.144	-2.61821	0.0156756	0.0619371	-3.45581
GPR126	0.847595	7.77498	2.615	0.0157875	0.0622526	-3.4623
FCN3	0.849197	6.1846	2.61464	0.0158004	0.0622927	-3.46304
RNA5SP405	-0.583215	5.41993	-2.61233	0.0158817	0.0625279	-3.46773
LAX1	1.05803	6.43733	2.61228	0.0158833	0.0625279	-3.46782
CDHR1	-0.957624	8.22559	-2.60638	0.0160928	0.0631357	-3.47977
LOC642131	1.19029	8.95571	2.60357	0.0161934	0.0634388	-3.48545
CA1	-1.39306	9.61117	-2.60226	0.0162405	0.0635615	-3.48809
LTF	1.10199	5.96676	2.60113	0.0162811	0.0636497	-3.49037
IGHV3-73	0.890321	11.2114	2.5986	0.0163726	0.0639011	-3.49548
BTNL8	-0.933042	8.84634	-2.59844	0.0163785	0.0639011	-3.49581
SELL	1.4715	6.93746	2.59519	0.0164968	0.0642396	-3.50236
EMCN	0.589183	6.15193	2.59515	0.0164982	0.0642396	-3.50244
CD177	-0.860205	11.5823	-2.59105	0.0166487	0.0646261	-3.51072
ASPN	0.717283	5.92903	2.58474	0.016883	0.0653233	-3.52344
AICDA	0.626277	5.05206	2.58335	0.0169349	0.0654805	-3.52624
SIGLEC14	0.594004	6.03289	2.58073	0.0170335	0.065644	-3.53152
LHFP	0.806891	8.62945	2.57882	0.0171055	0.0658342	-3.53536
IGLV6-57	1.29061	7.74993	2.57452	0.0172687	0.0662797	-3.544
SLAMF6	1.06735	6.58456	2.57275	0.0173365	0.0664598	-3.54756
BACH2	0.654007	5.57514	2.57149	0.0173845	0.0665674	-3.55008
CFI	1.0081	5.44858	2.56738	0.017543	0.0670421	-3.55834
CYP27A1	-0.594182	7.48831	-2.56265	0.0177269	0.0675566	-3.56782
PCK1	-1.71233	9.1446	-2.56254	0.0177313	0.067562	-3.56804
CLEC4E	0.608177	3.88602	2.55883	0.017877	0.0679838	-3.57548
ASAP1	0.640128	7.84566	2.55786	0.0179151	0.0680623	-3.57742
CXCL13	1.64005	6.59778	2.55375	0.0180783	0.068548	-3.58566
TAGAP	0.849055	6.18749	2.54741	0.0183322	0.0692181	-3.59833
IGKV1D-16	0.691803	10.159	2.54571	0.0184009	0.0694212	-3.60173
TMED6	-0.607592	5.60902	-2.54043	0.0186161	0.0700288	-3.61228
CA7	-1.06449	8.053	-2.53434	0.0188668	0.0707436	-3.62442
HBB	1.20985	7.55435	2.52697	0.0191747	0.0715527	-3.63911
C1S	0.930257	8.6993	2.52605	0.0192134	0.0716527	-3.64094
TREM1	0.821544	5.37211	2.52304	0.0193406	0.0719529	-3.64692
SLC9A3	-1.47247	9.04205	-2.52175	0.0193954	0.0720877	-3.64949
SECTM1	-0.613212	9.17361	-2.51942	0.0194944	0.0723389	-3.65411
LILRA1	0.698862	6.00822	2.51865	0.0195276	0.0723715	-3.65565
CDHR2	-0.779117	9.91931	-2.51498	0.0196852	0.0726781	-3.66293
HLA-DRA	0.707153	10.2748	2.51381	0.0197356	0.0728123	-3.66525
IGKV1D-33	1.05174	10.0766	2.51374	0.0197387	0.0728123	-3.66539
PTCH2	0.64286	6.68686	2.51052	0.0198783	0.0731359	-3.67178
RNU11	0.627844	7.23258	2.51005	0.019899	0.073166	-3.67272
EMP3	0.650406	7.80102	2.50463	0.020136	0.0737813	-3.68345
SNORA9	0.636587	8.26866	2.50416	0.0201568	0.0738343	-3.68438
ADRBK2	0.655912	6.13931	2.50387	0.0201697	0.0738362	-3.68496
CXCR4	0.882129	6.69759	2.50233	0.0202377	0.0740347	-3.68801
CR2	1.81366	6.07705	2.50181	0.0202608	0.0740754	-3.68904
NUP210	0.587443	7.52677	2.50119	0.0202882	0.0741483	-3.69027
IL6	0.993353	5.11683	2.50044	0.0203212	0.0741959	-3.69174
C7	0.867072	6.6358	2.50038	0.0203243	0.0741959	-3.69187
LOC102724453	0.870944	11.9049	2.49746	0.020454	0.0745189	-3.69764
GJA1	0.718659	6.39785	2.4965	0.020497	0.0746229	-3.69953
HIF1A	0.591715	10.25	2.49541	0.0205461	0.074755	-3.7017
MT1F	-0.758876	11.4791	-2.49397	0.0206105	0.0749603	-3.70454
BST2	0.634847	6.45068	2.48735	0.0209105	0.0757262	-3.71761
PLEK	1.17566	6.5564	2.48673	0.020939	0.0758058	-3.71884
IGHV3OR16-8	0.717723	9.13009	2.48595	0.0209745	0.0758887	-3.72037
PPP1R16B	0.667876	7.36405	2.48534	0.0210023	0.0759407	-3.72157
ME1	0.886434	8.05564	2.48529	0.021005	0.0759407	-3.72169
DSE	0.6245	6.86563	2.48306	0.0211074	0.0761953	-3.72608
KLK10	0.804482	7.10796	2.48264	0.0211267	0.0762366	-3.72691
CCR6	0.672982	5.61855	2.48184	0.0211633	0.0763332	-3.72847
TFPI	0.711091	6.05491	2.48081	0.0212107	0.0764453	-3.7305
CNKSR3	-0.667321	6.9935	-2.47953	0.0212701	0.0765585	-3.73303
ADM	0.769302	8.59763	2.47618	0.021426	0.0768883	-3.73963
CCL11	0.742506	6.83871	2.47547	0.021459	0.0769708	-3.74102
LIPC	-0.633751	5.05133	-2.47453	0.0215031	0.0770935	-3.74287
GBP4	1.19182	6.82802	2.46614	0.0218993	0.0781476	-3.75937
HSPA4L	0.593127	6.16662	2.46133	0.0221293	0.0787559	-3.7688
LCP2	0.74737	8.04443	2.459	0.0222415	0.0790178	-3.77337
GLIPR1	0.732874	8.1661	2.45846	0.0222674	0.0790796	-3.77442
STC1	0.969387	5.41269	2.45625	0.0223748	0.0793279	-3.77876
SEMA7A	0.716602	7.06013	2.45478	0.0224463	0.0795208	-3.78164
C4BPA	1.19326	5.51312	2.4528	0.0225429	0.0797576	-3.78552
CTLA4	0.640875	5.22529	2.45155	0.0226043	0.0799107	-3.78797
G0S2	0.650633	7.63419	2.44903	0.022728	0.0802262	-3.7929
SNORD116-29	0.767027	5.5358	2.44888	0.0227353	0.0802318	-3.79318
AFF3	0.591946	5.98125	2.44696	0.0228305	0.0804661	-3.79695
SGK1	-0.591598	7.46612	-2.43983	0.0231857	0.0812876	-3.81087
CAPN9	-0.608882	7.35322	-2.43474	0.0234426	0.0819286	-3.82081
ND6	-0.747319	7.41591	-2.43383	0.0234885	0.0820655	-3.82257
IGKV2D-28	0.856074	11.9711	2.43126	0.0236198	0.0823143	-3.82759
CNNM2	-0.591808	8.08466	-2.43055	0.0236562	0.0823697	-3.82898
PTGIS	0.591745	6.22549	2.42093	0.0241525	0.0833299	-3.84768
CTSH	0.749515	8.42755	2.41906	0.0242507	0.0835878	-3.85133
BANK1	1.27437	6.10753	2.41432	0.0244996	0.0842045	-3.86052
SLFN11	0.80211	6.7236	2.41372	0.0245313	0.0842562	-3.86168
P2RX5	0.830624	6.5006	2.41216	0.0246143	0.0844361	-3.86472
CLCA1	-1.34502	11.2823	-2.41191	0.0246271	0.0844482	-3.86519
THRB	-0.85807	7.39889	-2.41073	0.0246903	0.0846401	-3.86749
POU2AF1	0.828881	7.17695	2.40856	0.0248057	0.0849355	-3.87168
MZB1	0.940915	7.67446	2.40536	0.0249773	0.0853352	-3.87789
LUM	0.736623	9.08199	2.40462	0.0250172	0.0854387	-3.87932
IGKV1OR9-1	0.607141	8.43774	2.40305	0.025102	0.085598	-3.88236
ARHGEF6	0.599784	6.54361	2.40166	0.0251771	0.085804	-3.88505
HCAR3	0.979217	5.34681	2.40097	0.0252147	0.0859143	-3.88639
GPX7	0.683695	7.53886	2.39992	0.0252717	0.0860507	-3.88842
IL1R1	0.629776	7.52896	2.39953	0.0252927	0.0860981	-3.88916
KCNA3	0.777404	6.48291	2.3949	0.025546	0.0866795	-3.89812
HCAR2	0.734185	5.64416	2.39484	0.0255494	0.0866795	-3.89824
CD27	0.928909	7.76976	2.39345	0.0256259	0.0868128	-3.90092
INPP5D	0.717428	7.92538	2.39215	0.0256975	0.0869716	-3.90343
ATP6V0D2	-0.70282	5.7297	-2.39189	0.0257115	0.0870017	-3.90392
HTR1D	0.835374	6.07021	2.39161	0.0257274	0.0870302	-3.90447
PSAT1	0.687319	5.90422	2.38706	0.0259799	0.0876918	-3.91324
EDN1	-0.760083	7.65468	-2.38628	0.0260234	0.0877899	-3.91475
CXCL9	1.45578	6.45252	2.38628	0.0260236	0.0877899	-3.91475
DKK1	0.622328	4.77002	2.38546	0.0260692	0.0879058	-3.91633
PKDCC	-0.647763	8.00072	-2.38327	0.026192	0.0882207	-3.92054
AGT	0.742061	6.37877	2.38271	0.0262236	0.0883113	-3.92163
CCL21	0.997715	8.55446	2.38246	0.0262375	0.0883454	-3.9221
SNORD116-21	-0.834141	6.74221	-2.38017	0.026367	0.0886534	-3.92652
DCN	0.715594	7.90845	2.37384	0.0267271	0.0895412	-3.93869
FCGR3A	1.02506	6.42376	2.36808	0.0270588	0.0903391	-3.94975
SNORD116-1	0.671771	8.4156	2.36327	0.0273389	0.0909761	-3.95898
IKZF1	0.819982	6.60749	2.36246	0.0273862	0.091062	-3.96053
SERPINB3	1.68854	4.8267	2.36242	0.0273881	0.091062	-3.96059
PPY	0.64646	5.1983	2.35974	0.027546	0.0913913	-3.96574
GPR174	0.676501	6.66728	2.35749	0.0276788	0.091714	-3.97005
LILRB1	0.599889	6.87304	2.35692	0.0277123	0.091714	-3.97114
CD48	0.75839	7.95218	2.35527	0.0278102	0.0919146	-3.97429
ABCC1	0.592596	8.03025	2.35505	0.0278232	0.0919444	-3.97471
MMP2	0.891018	8.66859	2.35357	0.0279111	0.0921433	-3.97753
HLA-DOB	0.866326	6.08203	2.35305	0.027942	0.0921802	-3.97853
CD19	0.61885	6.55385	2.34559	0.0283906	0.0933562	-3.99278
CCDC109B	0.598479	6.5837	2.34325	0.0285324	0.0936902	-3.99724
SP140	0.762665	6.1631	2.34214	0.0286	0.0938593	-3.99936
ACTG2	0.923641	9.85112	2.34125	0.0286544	0.0940112	-4.00106
TPM2	0.593746	7.53471	2.33694	0.0289187	0.0946386	-4.00927
TMEM156	0.854126	5.29458	2.33585	0.0289861	0.0948459	-4.01135
SAA1	0.946768	5.27646	2.33527	0.0290217	0.0949491	-4.01245
IGKV3OR2-268	1.07334	8.67291	2.33244	0.0291973	0.0953229	-4.01784
CYTIP	0.824495	7.1504	2.32981	0.0293609	0.0956324	-4.02284
KMO	0.863283	4.96162	2.32521	0.0296495	0.0963488	-4.03158
DOCK11	0.657875	7.02308	2.31661	0.0301955	0.0976959	-4.04787
ACPP	0.679753	7.13417	2.30837	0.0307281	0.0987435	-4.06348
IGKV1D-42	0.648499	12.4733	2.30777	0.030767	0.0988411	-4.0646
ELOVL5	0.860246	8.11053	2.30199	0.031146	0.0995373	-4.07552
OCR1	0.701599	6.86868	2.2994	0.0313172	0.0999475	-4.08041
SLA	0.669918	6.42215	2.29863	0.0313677	0.100068	-4.08185
ARHGAP25	0.638271	6.38489	2.29666	0.0314991	0.10039	-4.08557
HLA-DRB3	0.589031	10.2096	2.29462	0.0316349	0.100727	-4.08941
IGKV3D-11	1.22651	10.128	2.29206	0.0318068	0.101205	-4.09423
FCRL5	0.974575	5.8758	2.29123	0.0318624	0.101298	-4.09579
GBP5	1.06011	6.27972	2.29112	0.0318698	0.101298	-4.096
PLA1A	0.621464	5.77971	2.28913	0.0320039	0.101569	-4.09974
SLC15A2	0.745714	6.31424	2.28839	0.0320545	0.101682	-4.10114
REG1A	2.18871	6.74432	2.28639	0.0321897	0.10202	-4.10489
MT1M	-1.2636	9.25607	-2.2862	0.0322029	0.102047	-4.10526
PP7080	-1.0954	9.2895	-2.28093	0.032563	0.102895	-4.11515
IGKV1OR9-2	0.600343	9.08291	2.26914	0.0333813	0.104587	-4.13723
APBB1IP	0.599382	6.42212	2.26272	0.0338353	0.105484	-4.14924
F2RL2	0.846141	6.02136	2.26266	0.0338395	0.105484	-4.14935
PTPRC	0.924115	7.95058	2.26188	0.0338945	0.105597	-4.15079
IL13RA2	1.05465	4.38682	2.2611	0.0339503	0.105688	-4.15225
IGKC	0.782262	10.8252	2.25741	0.0342146	0.106269	-4.15914
FLI1	0.627881	6.79313	2.25495	0.034392	0.106705	-4.16374
MT1X	-0.67046	9.23907	-2.25108	0.0346721	0.107432	-4.17094
S100A12	1.34744	5.02892	2.24279	0.0352796	0.108578	-4.18635
SLC26A4	0.852944	4.5808	2.23565	0.0358108	0.109615	-4.1996
SAA2	0.810334	5.18976	2.23543	0.0358272	0.109638	-4.2
THEMIS2	0.768025	7.23825	2.23336	0.0359821	0.109939	-4.20383
TDO2	1.09207	5.263	2.22988	0.0362448	0.110527	-4.21027
MNDA	0.833317	5.17222	2.22699	0.0364644	0.111022	-4.21562
CD38	0.855267	7.1689	2.22637	0.0365118	0.111138	-4.21678
BNIP3	0.717537	7.14611	2.22218	0.0368321	0.111835	-4.22451
IGKV2OR22-4	0.703188	5.28377	2.21993	0.0370057	0.11226	-4.22867
IGKV2D-24	0.946907	9.66667	2.21931	0.0370536	0.112356	-4.22981
WDFY4	0.676336	6.51679	2.21788	0.0371643	0.112638	-4.23246
HVCN1	0.591939	6.29533	2.21575	0.0373291	0.113031	-4.23637
KLF7	0.59061	7.48371	2.21572	0.0373313	0.113031	-4.23642
IGKV3D-20	1.13609	10.3562	2.21489	0.0373961	0.11312	-4.23796
ACSL4	0.822088	6.80461	2.21398	0.0374669	0.113246	-4.23963
CD83	0.590619	6.40268	2.20471	0.0381966	0.114826	-4.25669
SRGN	0.809585	8.50785	2.20326	0.0383123	0.115055	-4.25936
ISX	-0.748885	7.71042	-2.20208	0.0384064	0.115304	-4.26153
CEP170	0.6843	6.31391	2.1989	0.0386606	0.115851	-4.26735
CD180	1.14547	6.47086	2.19846	0.0386964	0.11591	-4.26817
RSAD2	-0.719682	6.93311	-2.19464	0.0390045	0.116638	-4.27518
PRKCB	0.647243	7.49433	2.19232	0.0391927	0.117081	-4.27942
RETNLB	-0.889547	8.6738	-2.19207	0.039213	0.117126	-4.27988
IGKV1-13	0.659456	9.0515	2.19091	0.0393074	0.117348	-4.282
CNGA1	-0.63545	4.93611	-2.18836	0.0395159	0.117789	-4.28667
FIBIN	0.697467	5.27781	2.187	0.0396268	0.117986	-4.28915
TLR1	0.591321	5.63987	2.18606	0.039704	0.118169	-4.29086
CD37	0.894623	7.78046	2.18502	0.0397903	0.11838	-4.29278
CCL19	1.15846	7.63587	2.18421	0.039857	0.118533	-4.29426
BTLA	0.644062	5.31312	2.17442	0.0406721	0.120282	-4.3121
REG1B	1.83504	5.27538	2.17428	0.0406843	0.120303	-4.31237
CYTH4	0.61341	7.1719	2.17109	0.0409529	0.120847	-4.31817
KIAA1324L	-0.778822	7.06806	-2.16785	0.0412279	0.121295	-4.32406
IGLV7-46	0.972168	7.55131	2.16612	0.0413757	0.121581	-4.32721
EVI2B	0.759688	9.16635	2.16037	0.041869	0.122485	-4.33765
ITGAX	0.70045	6.67761	2.15919	0.0419708	0.122613	-4.33978
IGKV1OR2-3	1.10829	9.96213	2.15461	0.0423691	0.123437	-4.34809
RGS1	0.645538	5.36201	2.1522	0.0425798	0.123896	-4.35245
ASS1P11	0.608369	7.11568	2.15052	0.0427271	0.124147	-4.35549
KLHL6	0.683057	7.23418	2.14975	0.0427946	0.124288	-4.35688
CHST15	0.664465	7.26496	2.14688	0.0430481	0.124744	-4.36207
SLC28A2	1.16612	7.33598	2.14216	0.0434675	0.125585	-4.37059
IKZF3	0.833261	6.94015	2.13968	0.0436897	0.126055	-4.37507
LILRB2	0.65193	6.72681	2.13794	0.0438458	0.126302	-4.3782
CCR7	0.764731	7.21713	2.13747	0.0438878	0.126388	-4.37904
CYP3A4	-1.38047	5.30713	-2.13299	0.0442933	0.127151	-4.38711
SFRP2	0.744379	5.9165	2.13033	0.0445349	0.127647	-4.39189
TLR10	0.816549	5.44904	2.12618	0.0449156	0.128537	-4.39935
GMPR	0.65749	6.84694	2.12613	0.0449197	0.128537	-4.39943
CD79B	0.638247	6.75959	2.12606	0.0449259	0.128539	-4.39955
LYVE1	0.952376	6.65467	2.12532	0.0449946	0.128688	-4.40089
GCG	0.85394	9.15996	2.1245	0.0450695	0.12884	-4.40235
HAVCR1	-0.848506	6.42365	-2.12043	0.0454469	0.1296	-4.40966
PROK2	0.648083	6.38015	2.12037	0.0454524	0.1296	-4.40977
MIR155HG	0.706366	5.08003	2.11605	0.0458557	0.130358	-4.41751
CATSPERB	0.677501	5.91217	2.10773	0.0466408	0.131779	-4.43237
CORO1A	0.777639	8.62934	2.10339	0.0470549	0.132551	-4.44011
EMR2	0.790362	6.727	2.10247	0.0471434	0.132701	-4.44175
HGF	0.716051	5.63304	2.10238	0.0471524	0.132708	-4.44192
CD72	0.760684	6.16884	2.09926	0.0474524	0.133201	-4.44747
IGHV3OR15-7	0.6967	5.57434	2.07641	0.0497069	0.137688	-4.48801
