# Supplementary material for: Bioinformatics analysis of oxidative stress genes in the pathogenesis of ulcerative colitis based on a competing endogenous RNA regulatory network
Source: PeerJ. 2024 Aug 16;12:e17213. doi: 10.7717/peerj.17213 (PMC11332386; doi:10.7717/peerj.17213)
Supplement: Supplemental Information 9 [file peerj-12-17213-s009.xlsx]

## Sheet: Supplementary Table S4
node1	node2	R	pvalue	fdr	positive	R1
hsa-miR-125b	CGN	-0.636481	0.00192142	1	0	0.636481
hsa-miR-125b	FGFR2	-0.791153	1.95e-05	0.238623	0	0.791153
hsa-miR-125b	ACADS	-0.671948	0.000849439	1	0	0.671948
hsa-miR-125b	RMND5A	-0.679104	0.000711112	1	0	0.679104
hsa-miR-194	DUSP10	-0.711474	0.000298592	1	0	0.711474
hsa-miR-194	CAV1	-0.597687	0.00421802	1	0	0.597687
hsa-miR-194	PHLDA1	-0.75164	8.55e-05	0.975611	0	0.75164
hsa-miR-194	CADM1	-0.642767	0.00167486	1	0	0.642767
hsa-miR-194	FERMT2	-0.448881	0.0412344	1	0	0.448881
hsa-miR-194	SLC7A11	-0.626844	0.00235834	1	0	0.626844
hsa-miR-194	SLC7A5	-0.66603	0.000980504	1	0	0.66603
hsa-miR-194	QKI	-0.691582	0.000515519	1	0	0.691582
hsa-miR-194	PTPN13	-0.718681	0.000242296	1	0	0.718681
hsa-miR-194	LSAMP	-0.59026	0.00484954	1	0	0.59026
hsa-miR-194	SRM	-0.497267	0.0218175	1	0	0.497267
hsa-miR-194	ASAP1	-0.640284	0.00176887	1	0	0.640284
hsa-miR-194	HSPA4L	-0.559574	0.00834927	1	0	0.559574
hsa-miR-194	CEP170	-0.597821	0.00420728	1	0	0.597821
hsa-miR-29b-1-star	KITLG	-0.751273	8.66e-05	0.986198	0	0.751273
AMACR	FGFR2	0.894075	9.18e-39	6.61e-34	1	0.894075
AMACR	PHLDA1	-0.858174	1.81e-32	1.29e-27	0	0.858174
AMACR	DUSP10	-0.655877	1.32e-14	6.6e-10	0	0.655877
AMACR	RMND5A	0.806596	5.97e-26	4.12e-21	1	0.806596
AMACR	ACADS	0.844722	1.52e-30	1.08e-25	1	0.844722
AMACR	PTPN13	-0.72241	1.1e-18	6.55e-14	0	0.72241
AMACR	SLC7A5	-0.813313	1.11e-26	7.69e-22	0	0.813313
AMACR	SLC7A11	-0.74742	1.53e-20	9.64e-16	0	0.74742
AMACR	CAV1	-0.563756	2.12e-10	7.62e-06	0	0.563756
AMACR	ASAP1	-0.747159	1.61e-20	1.01e-15	0	0.747159
AMACR	SRM	-0.631033	2.47e-13	1.15e-08	0	0.631033
AMACR	FERMT2	-0.608695	2.78e-12	1.19e-07	0	0.608695
AMACR	CADM1	-0.600954	6.15e-12	2.57e-07	0	0.600954
AMACR	LSAMP	-0.632392	2.12e-13	9.86e-09	0	0.632392
AMACR	QKI	-0.654589	1.55e-14	7.7e-10	0	0.654589
AMACR	CGN	0.599444	7.16e-12	2.98e-07	1	0.599444
AMACR	KITLG	0.708099	1.04e-17	5.96e-13	1	0.708099
AMACR	CEP170	-0.639691	9.18e-14	4.37e-09	0	0.639691
AMACR	HSPA4L	-0.268928	0.00488827	1	0	0.268928
MGC32805	FGFR2	0.548545	7.96e-10	2.68e-05	1	0.548545
MGC32805	PHLDA1	-0.458448	6.06e-07	0.0130504	0	0.458448
MGC32805	DUSP10	-0.47216	2.49e-07	0.00576829	0	0.47216
MGC32805	RMND5A	0.33194	0.000448882	1	1	0.33194
MGC32805	ACADS	0.558521	3.36e-10	1.18e-05	1	0.558521
MGC32805	PTPN13	-0.391874	2.74e-05	0.397261	0	0.391874
MGC32805	SLC7A5	-0.437812	2.15e-06	0.0412726	0	0.437812
MGC32805	SLC7A11	-0.364855	0.00010348	1	0	0.364855
MGC32805	CAV1	-0.296438	0.00183847	1	0	0.296438
MGC32805	ASAP1	-0.368708	8.62e-05	1	0	0.368708
MGC32805	SRM	-0.445954	1.32e-06	0.0264631	0	0.445954
MGC32805	FERMT2	-0.364218	0.000106626	1	0	0.364218
MGC32805	CADM1	-0.508581	1.91e-08	0.000535479	0	0.508581
MGC32805	LSAMP	-0.427038	4.05e-06	0.0729086	0	0.427038
MGC32805	QKI	-0.337373	0.000356211	1	0	0.337373
MGC32805	CGN	0.383349	4.22e-05	0.578514	1	0.383349
MGC32805	KITLG	0.363554	0.00011	1	1	0.363554
MGC32805	CEP170	-0.337497	0.000354322	1	0	0.337497
MGC32805	HSPA4L	-0.194561	0.0436185	1	0	0.194561
CDK3	FGFR2	0.627185	3.8e-13	1.74e-08	1	0.627185
CDK3	PHLDA1	-0.581321	4.21e-11	1.63e-06	0	0.581321
CDK3	DUSP10	-0.683235	3.75e-16	2.02e-11	0	0.683235
CDK3	RMND5A	0.452463	8.83e-07	0.0184011	1	0.452463
CDK3	ACADS	0.582222	3.86e-11	1.5e-06	1	0.582222
CDK3	PTPN13	-0.582616	3.72e-11	1.45e-06	0	0.582616
CDK3	SLC7A5	-0.557924	3.54e-10	1.24e-05	0	0.557924
CDK3	SLC7A11	-0.555984	4.2e-10	1.46e-05	0	0.555984
CDK3	CAV1	-0.508957	1.86e-08	0.000521698	0	0.508957
CDK3	ASAP1	-0.577567	5.99e-11	2.28e-06	0	0.577567
CDK3	SRM	-0.616797	1.18e-12	5.22e-08	0	0.616797
CDK3	FERMT2	-0.512799	1.4e-08	0.000398397	0	0.512799
CDK3	CADM1	-0.604216	4.41e-12	1.87e-07	0	0.604216
CDK3	LSAMP	-0.510911	1.61e-08	0.000454941	0	0.510911
CDK3	QKI	-0.579271	5.11e-11	1.96e-06	0	0.579271
CDK3	CGN	0.448533	1.13e-06	0.0229384	1	0.448533
CDK3	KITLG	0.292981	0.00208997	1	1	0.292981
CDK3	CEP170	-0.561081	2.68e-10	9.56e-06	0	0.561081
CDK3	HSPA4L	-0.447489	1.2e-06	0.0243265	0	0.447489
LOC648987	FGFR2	-0.609418	2.58e-12	1.11e-07	0	0.609418
LOC648987	PHLDA1	0.572066	9.97e-11	3.72e-06	1	0.572066
LOC648987	DUSP10	0.660135	7.77e-15	3.93e-10	1	0.660135
LOC648987	RMND5A	-0.491986	6.39e-08	0.0016426	0	0.491986
LOC648987	ACADS	-0.550602	6.68e-10	2.27e-05	0	0.550602
LOC648987	PTPN13	0.640325	8.53e-14	4.06e-09	1	0.640325
LOC648987	SLC7A5	0.556324	4.08e-10	1.42e-05	1	0.556324
LOC648987	SLC7A11	0.506407	2.25e-08	0.000621654	1	0.506407
LOC648987	CAV1	0.492929	5.98e-08	0.00154352	1	0.492929
LOC648987	ASAP1	0.596634	9.5e-12	3.9e-07	1	0.596634
LOC648987	SRM	0.499548	3.72e-08	0.000992519	1	0.499548
LOC648987	FERMT2	0.477831	1.7e-07	0.00407153	1	0.477831
LOC648987	CADM1	0.453528	8.26e-07	0.0173056	1	0.453528
LOC648987	LSAMP	0.547285	8.85e-10	2.97e-05	1	0.547285
LOC648987	QKI	0.590829	1.69e-11	6.77e-07	1	0.590829
LOC648987	CGN	-0.470319	2.81e-07	0.00644829	0	0.470319
LOC648987	KITLG	-0.370739	7.82e-05	0.9844	0	0.370739
LOC648987	CEP170	0.560867	2.74e-10	9.73e-06	1	0.560867
LOC648987	HSPA4L	0.336775	0.00036548	1	1	0.336775
PLSCR3	FGFR2	-0.760528	1.33e-21	8.57e-17	0	0.760528
PLSCR3	PHLDA1	0.765873	4.69e-22	3.05e-17	1	0.765873
PLSCR3	DUSP10	0.623271	5.86e-13	2.64e-08	1	0.623271
PLSCR3	RMND5A	-0.755195	3.66e-21	2.34e-16	0	0.755195
PLSCR3	ACADS	-0.762128	9.76e-22	6.31e-17	0	0.762128
PLSCR3	PTPN13	0.661266	6.74e-15	3.42e-10	1	0.661266
PLSCR3	SLC7A5	0.815523	6.26e-27	4.36e-22	1	0.815523
PLSCR3	SLC7A11	0.61869	9.64e-13	4.28e-08	1	0.61869
PLSCR3	CAV1	0.777073	4.81e-23	3.19e-18	1	0.777073
PLSCR3	ASAP1	0.868286	4.73e-34	3.4e-29	1	0.868286
PLSCR3	SRM	0.744075	2.79e-20	1.74e-15	1	0.744075
PLSCR3	FERMT2	0.760939	1.23e-21	7.92e-17	1	0.760939
PLSCR3	CADM1	0.726439	5.71e-19	3.43e-14	1	0.726439
PLSCR3	LSAMP	0.824389	5.9e-28	4.14e-23	1	0.824389
PLSCR3	QKI	0.847874	5.61e-31	3.99e-26	1	0.847874
PLSCR3	CGN	-0.763958	6.83e-22	4.43e-17	0	0.763958
PLSCR3	KITLG	-0.651015	2.39e-14	1.18e-09	0	0.651015
PLSCR3	CEP170	0.758485	1.97e-21	1.26e-16	1	0.758485
RDH5	FGFR2	0.696053	6.17e-17	3.44e-12	1	0.696053
RDH5	PHLDA1	-0.720554	1.48e-18	8.8e-14	0	0.720554
RDH5	DUSP10	-0.684323	3.23e-16	1.75e-11	0	0.684323
RDH5	RMND5A	0.583096	3.55e-11	1.39e-06	1	0.583096
RDH5	ACADS	0.762224	9.58e-22	6.2e-17	1	0.762224
RDH5	PTPN13	-0.644705	5.1e-14	2.46e-09	0	0.644705
RDH5	SLC7A5	-0.69065	1.33e-16	7.35e-12	0	0.69065
RDH5	SLC7A11	-0.594291	1.2e-11	4.88e-07	0	0.594291
RDH5	CAV1	-0.644907	4.98e-14	2.4e-09	0	0.644907
RDH5	ASAP1	-0.73654	1.04e-19	6.42e-15	0	0.73654
RDH5	SRM	-0.647849	3.5e-14	1.71e-09	0	0.647849
RDH5	FERMT2	-0.703721	2e-17	1.14e-12	0	0.703721
RDH5	CADM1	-0.739366	6.41e-20	3.96e-15	0	0.739366
RDH5	LSAMP	-0.654439	1.58e-14	7.84e-10	0	0.654439
RDH5	QKI	-0.75593	3.19e-21	2.04e-16	0	0.75593
RDH5	CGN	0.666841	3.31e-15	1.71e-10	1	0.666841
RDH5	KITLG	0.440282	1.86e-06	0.0361363	1	0.440282
RDH5	CEP170	-0.771661	1.47e-22	9.65e-18	0	0.771661
RDH5	HSPA4L	-0.370686	7.84e-05	0.986613	0	0.370686
HOXA9	FGFR2	0.673408	1.41e-15	7.39e-11	1	0.673408
HOXA9	PHLDA1	-0.613262	1.72e-12	7.51e-08	0	0.613262
HOXA9	DUSP10	-0.389179	3.14e-05	0.447993	0	0.389179
HOXA9	RMND5A	0.472143	2.49e-07	0.00577405	1	0.472143
HOXA9	ACADS	0.602602	5.2e-12	2.19e-07	1	0.602602
HOXA9	PTPN13	-0.32625	0.000569311	1	0	0.32625
HOXA9	SLC7A5	-0.512026	1.48e-08	0.000420618	0	0.512026
HOXA9	SLC7A11	-0.453923	8.06e-07	0.0169203	0	0.453923
HOXA9	CAV1	-0.395616	2.26e-05	0.33536	0	0.395616
HOXA9	ASAP1	-0.476529	1.86e-07	0.00441677	0	0.476529
HOXA9	SRM	-0.404558	1.41e-05	0.221559	0	0.404558
HOXA9	FERMT2	-0.432557	2.94e-06	0.0546355	0	0.432557
HOXA9	CADM1	-0.474497	2.13e-07	0.00500339	0	0.474497
HOXA9	LSAMP	-0.413966	8.45e-06	0.140996	0	0.413966
HOXA9	QKI	-0.436246	2.36e-06	0.0449419	0	0.436246
HOXA9	CGN	0.495156	5.1e-08	0.00133341	1	0.495156
HOXA9	KITLG	0.585814	2.74e-11	1.08e-06	1	0.585814
HOXA9	CEP170	-0.392758	2.62e-05	0.381993	0	0.392758
SATB2-AS1	FGFR2	0.8128	1.26e-26	8.76e-22	1	0.8128
SATB2-AS1	PHLDA1	-0.794211	1.13e-24	7.67e-20	0	0.794211
SATB2-AS1	DUSP10	-0.633967	1.77e-13	8.29e-09	0	0.633967
SATB2-AS1	RMND5A	0.796299	6.98e-25	4.75e-20	1	0.796299
SATB2-AS1	ACADS	0.688657	1.77e-16	9.68e-12	1	0.688657
SATB2-AS1	PTPN13	-0.795731	7.96e-25	5.42e-20	0	0.795731
SATB2-AS1	SLC7A5	-0.752568	5.98e-21	3.8e-16	0	0.752568
SATB2-AS1	SLC7A11	-0.739959	5.78e-20	3.57e-15	0	0.739959
SATB2-AS1	CAV1	-0.588625	2.09e-11	8.32e-07	0	0.588625
SATB2-AS1	ASAP1	-0.737204	9.32e-20	5.73e-15	0	0.737204
SATB2-AS1	SRM	-0.597163	9.01e-12	3.71e-07	0	0.597163
SATB2-AS1	FERMT2	-0.592386	1.45e-11	5.84e-07	0	0.592386
SATB2-AS1	CADM1	-0.486435	9.43e-08	0.00236173	0	0.486435
SATB2-AS1	LSAMP	-0.666482	3.47e-15	1.79e-10	0	0.666482
SATB2-AS1	QKI	-0.664104	4.7e-15	2.41e-10	0	0.664104
SATB2-AS1	CGN	0.518756	8.86e-09	0.000260371	1	0.518756
SATB2-AS1	KITLG	0.576551	6.59e-11	2.5e-06	1	0.576551
SATB2-AS1	CEP170	-0.694124	8.14e-17	4.52e-12	0	0.694124
SATB2-AS1	HSPA4L	-0.437474	2.2e-06	0.0420506	0	0.437474
LOC100506730	FGFR2	0.782809	1.42e-23	9.52e-19	1	0.782809
LOC100506730	PHLDA1	-0.713007	4.87e-18	2.84e-13	0	0.713007
LOC100506730	DUSP10	-0.547639	8.59e-10	2.89e-05	0	0.547639
LOC100506730	RMND5A	0.636596	1.31e-13	6.19e-09	1	0.636596
LOC100506730	ACADS	0.681706	4.62e-16	2.48e-11	1	0.681706
LOC100506730	PTPN13	-0.585527	2.82e-11	1.11e-06	0	0.585527
LOC100506730	SLC7A5	-0.650985	2.4e-14	1.18e-09	0	0.650985
LOC100506730	SLC7A11	-0.691266	1.22e-16	6.74e-12	0	0.691266
LOC100506730	CAV1	-0.340185	0.000315508	1	0	0.340185
LOC100506730	ASAP1	-0.506975	2.16e-08	0.000598093	0	0.506975
LOC100506730	SRM	-0.414452	8.23e-06	0.137609	0	0.414452
LOC100506730	FERMT2	-0.354536	0.000166798	1	0	0.354536
LOC100506730	CADM1	-0.37747	5.65e-05	0.743848	0	0.37747
LOC100506730	LSAMP	-0.482592	1.23e-07	0.00302281	0	0.482592
LOC100506730	QKI	-0.389759	3.05e-05	0.436596	0	0.389759
LOC100506730	CGN	0.365507	0.000100351	1	1	0.365507
LOC100506730	KITLG	0.624335	5.21e-13	2.36e-08	1	0.624335
LOC100506730	CEP170	-0.420613	5.83e-06	0.101331	0	0.420613
MROH7	FGFR2	0.71747	2.42e-18	1.43e-13	1	0.71747
MROH7	PHLDA1	-0.749975	9.64e-21	6.09e-16	0	0.749975
MROH7	DUSP10	-0.738096	7.99e-20	4.92e-15	0	0.738096
MROH7	RMND5A	0.573149	9.03e-11	3.38e-06	1	0.573149
MROH7	ACADS	0.675638	1.05e-15	5.54e-11	1	0.675638
MROH7	PTPN13	-0.755146	3.7e-21	2.36e-16	0	0.755146
MROH7	SLC7A5	-0.754408	4.25e-21	2.7e-16	0	0.754408
MROH7	SLC7A11	-0.783838	1.14e-23	7.63e-19	0	0.783838
MROH7	CAV1	-0.533465	2.77e-09	8.75e-05	0	0.533465
MROH7	ASAP1	-0.722861	1.02e-18	6.1e-14	0	0.722861
MROH7	SRM	-0.682559	4.11e-16	2.22e-11	0	0.682559
MROH7	FERMT2	-0.528355	4.18e-09	0.000128611	0	0.528355
MROH7	CADM1	-0.557386	3.71e-10	1.3e-05	0	0.557386
MROH7	LSAMP	-0.611424	2.09e-12	9.06e-08	0	0.611424
MROH7	QKI	-0.674235	1.26e-15	6.65e-11	0	0.674235
MROH7	CGN	0.460774	5.22e-07	0.0113893	1	0.460774
MROH7	KITLG	0.382257	4.46e-05	0.606765	1	0.382257
MROH7	CEP170	-0.669888	2.23e-15	1.16e-10	0	0.669888
MROH7	HSPA4L	-0.497822	4.21e-08	0.00111602	0	0.497822
C11orf52	FGFR2	0.790596	2.56e-24	1.73e-19	1	0.790596
C11orf52	PHLDA1	-0.830519	1.06e-28	7.5e-24	0	0.830519
C11orf52	DUSP10	-0.725294	6.89e-19	4.13e-14	0	0.725294
C11orf52	RMND5A	0.679195	6.5e-16	3.47e-11	1	0.679195
C11orf52	ACADS	0.772164	1.33e-22	8.72e-18	1	0.772164
C11orf52	PTPN13	-0.695702	6.49e-17	3.62e-12	0	0.695702
C11orf52	SLC7A5	-0.827029	2.84e-28	2e-23	0	0.827029
C11orf52	SLC7A11	-0.777597	4.31e-23	2.86e-18	0	0.777597
C11orf52	CAV1	-0.592387	1.45e-11	5.84e-07	0	0.592387
C11orf52	ASAP1	-0.777217	4.67e-23	3.1e-18	0	0.777217
C11orf52	SRM	-0.651807	2.17e-14	1.07e-09	0	0.651807
C11orf52	FERMT2	-0.665828	3.77e-15	1.94e-10	0	0.665828
C11orf52	CADM1	-0.636931	1.26e-13	5.96e-09	0	0.636931
C11orf52	LSAMP	-0.686095	2.53e-16	1.37e-11	0	0.686095
C11orf52	QKI	-0.688785	1.74e-16	9.51e-12	0	0.688785
C11orf52	CGN	0.556187	4.12e-10	1.44e-05	1	0.556187
C11orf52	KITLG	0.536791	2.12e-09	6.78e-05	1	0.536791
C11orf52	CEP170	-0.699194	3.9e-17	2.2e-12	0	0.699194
C11orf52	HSPA4L	-0.348383	0.000220035	1	0	0.348383
LINC00526	FGFR2	0.812378	1.4e-26	9.75e-22	1	0.812378
LINC00526	PHLDA1	-0.803538	1.26e-25	8.65e-21	0	0.803538
LINC00526	DUSP10	-0.584919	2.99e-11	1.17e-06	0	0.584919
LINC00526	RMND5A	0.779747	2.74e-23	1.82e-18	1	0.779747
LINC00526	ACADS	0.808504	3.72e-26	2.57e-21	1	0.808504
LINC00526	PTPN13	-0.691879	1.12e-16	6.19e-12	0	0.691879
LINC00526	SLC7A5	-0.811413	1.79e-26	1.24e-21	0	0.811413
LINC00526	SLC7A11	-0.647338	3.73e-14	1.81e-09	0	0.647338
LINC00526	CAV1	-0.716101	3.01e-18	1.77e-13	0	0.716101
LINC00526	ASAP1	-0.852241	1.35e-31	9.64e-27	0	0.852241
LINC00526	SRM	-0.672754	1.53e-15	8.05e-11	0	0.672754
LINC00526	FERMT2	-0.737839	8.35e-20	5.14e-15	0	0.737839
LINC00526	CADM1	-0.689345	1.6e-16	8.8e-12	0	0.689345
LINC00526	LSAMP	-0.793601	1.3e-24	8.82e-20	0	0.793601
LINC00526	QKI	-0.791677	2.01e-24	1.36e-19	0	0.791677
LINC00526	CGN	0.728195	4.27e-19	2.58e-14	1	0.728195
LINC00526	KITLG	0.661396	6.63e-15	3.37e-10	1	0.661396
LINC00526	CEP170	-0.769482	2.28e-22	1.49e-17	0	0.769482
LINC00526	HSPA4L	-0.191673	0.0468987	1	0	0.191673
RTEL1	FGFR2	-0.815914	5.66e-27	3.94e-22	0	0.815914
RTEL1	PHLDA1	0.768363	2.86e-22	1.87e-17	1	0.768363
RTEL1	DUSP10	0.631765	2.28e-13	1.06e-08	1	0.631765
RTEL1	RMND5A	-0.60326	4.86e-12	2.05e-07	0	0.60326
RTEL1	ACADS	-0.698157	4.54e-17	2.55e-12	0	0.698157
RTEL1	PTPN13	0.681617	4.68e-16	2.51e-11	1	0.681617
RTEL1	SLC7A5	0.716967	2.62e-18	1.54e-13	1	0.716967
RTEL1	SLC7A11	0.848075	5.26e-31	3.74e-26	1	0.848075
RTEL1	CAV1	0.26087	0.00639365	1	1	0.26087
RTEL1	ASAP1	0.554399	4.82e-10	1.67e-05	1	0.554399
RTEL1	SRM	0.462669	4.62e-07	0.0101816	1	0.462669
RTEL1	FERMT2	0.312119	0.00100743	1	1	0.312119
RTEL1	CADM1	0.378012	5.5e-05	0.726634	1	0.378012
RTEL1	LSAMP	0.437427	2.2e-06	0.0421587	1	0.437427
RTEL1	QKI	0.390232	2.98e-05	0.42773	1	0.390232
RTEL1	CGN	-0.236253	0.013832	1	0	0.236253
RTEL1	KITLG	-0.632986	1.98e-13	9.24e-09	0	0.632986
RTEL1	CEP170	0.44547	1.36e-06	0.0271782	1	0.44547
RTEL1	HSPA4L	0.282617	0.00304131	1	1	0.282617
LINC00483	FGFR2	0.675944	1.01e-15	5.32e-11	1	0.675944
LINC00483	PHLDA1	-0.716944	2.63e-18	1.55e-13	0	0.716944
LINC00483	DUSP10	-0.470946	2.69e-07	0.00620671	0	0.470946
LINC00483	RMND5A	0.682667	4.05e-16	2.18e-11	1	0.682667
LINC00483	ACADS	0.792349	1.73e-24	1.17e-19	1	0.792349
LINC00483	PTPN13	-0.512621	1.41e-08	0.00040335	0	0.512621
LINC00483	SLC7A5	-0.729632	3.36e-19	2.04e-14	0	0.729632
LINC00483	SLC7A11	-0.459433	5.69e-07	0.0123198	0	0.459433
LINC00483	CAV1	-0.733228	1.84e-19	1.12e-14	0	0.733228
LINC00483	ASAP1	-0.764388	6.28e-22	4.08e-17	0	0.764388
LINC00483	SRM	-0.677174	8.53e-16	4.53e-11	0	0.677174
LINC00483	FERMT2	-0.791255	2.21e-24	1.5e-19	0	0.791255
LINC00483	CADM1	-0.70921	8.74e-18	5.05e-13	0	0.70921
LINC00483	LSAMP	-0.690975	1.27e-16	7.02e-12	0	0.690975
LINC00483	QKI	-0.762203	9.62e-22	6.22e-17	0	0.762203
LINC00483	CGN	0.890335	5.22e-38	3.76e-33	1	0.890335
LINC00483	KITLG	0.562963	2.27e-10	8.15e-06	1	0.562963
LINC00483	CEP170	-0.720317	1.54e-18	9.13e-14	0	0.720317
CCL14	FGFR2	0.68784	1.98e-16	1.08e-11	1	0.68784
CCL14	PHLDA1	-0.711789	5.88e-18	3.42e-13	0	0.711789
CCL14	DUSP10	-0.536994	2.08e-09	6.68e-05	0	0.536994
CCL14	RMND5A	0.677541	8.12e-16	4.32e-11	1	0.677541
CCL14	ACADS	0.631379	2.38e-13	1.1e-08	1	0.631379
CCL14	PTPN13	-0.540757	1.53e-09	4.97e-05	0	0.540757
CCL14	SLC7A5	-0.670715	2e-15	1.05e-10	0	0.670715
CCL14	SLC7A11	-0.609945	2.44e-12	1.05e-07	0	0.609945
CCL14	CAV1	-0.461662	4.93e-07	0.0108107	0	0.461662
CCL14	ASAP1	-0.588309	2.15e-11	8.57e-07	0	0.588309
CCL14	SRM	-0.531476	3.26e-09	0.000101743	0	0.531476
CCL14	FERMT2	-0.505575	2.39e-08	0.00065817	0	0.505575
CCL14	CADM1	-0.511868	1.5e-08	0.00042529	0	0.511868
CCL14	LSAMP	-0.465531	3.84e-07	0.00860079	0	0.465531
CCL14	QKI	-0.531292	3.3e-09	0.000103158	0	0.531292
CCL14	CGN	0.48686	9.15e-08	0.00229658	1	0.48686
CCL14	KITLG	0.452424	8.85e-07	0.0184459	1	0.452424
CCL14	CEP170	-0.556505	4.01e-10	1.4e-05	0	0.556505
CCL14	HSPA4L	-0.376277	5.98e-05	0.783161	0	0.376277
PEA15	FGFR2	-0.626661	4.03e-13	1.84e-08	0	0.626661
PEA15	PHLDA1	0.665207	4.09e-15	2.1e-10	1	0.665207
PEA15	DUSP10	0.696673	5.64e-17	3.15e-12	1	0.696673
PEA15	RMND5A	-0.450382	1e-06	0.0206991	0	0.450382
PEA15	ACADS	-0.739913	5.82e-20	3.6e-15	0	0.739913
PEA15	PTPN13	0.555333	4.44e-10	1.54e-05	1	0.555333
PEA15	SLC7A5	0.720006	1.62e-18	9.59e-14	1	0.720006
PEA15	SLC7A11	0.614505	1.51e-12	6.61e-08	1	0.614505
PEA15	CAV1	0.684452	3.17e-16	1.72e-11	1	0.684452
PEA15	ASAP1	0.781704	1.8e-23	1.21e-18	1	0.781704
PEA15	SRM	0.73054	2.89e-19	1.75e-14	1	0.73054
PEA15	FERMT2	0.702433	2.42e-17	1.38e-12	1	0.702433
PEA15	CADM1	0.801433	2.08e-25	1.43e-20	1	0.801433
PEA15	LSAMP	0.67424	1.26e-15	6.64e-11	1	0.67424
PEA15	QKI	0.799596	3.22e-25	2.21e-20	1	0.799596
PEA15	CGN	-0.687019	2.22e-16	1.21e-11	0	0.687019
PEA15	KITLG	-0.424469	4.69e-06	0.0831285	0	0.424469
PEA15	CEP170	0.784516	9.84e-24	6.59e-19	1	0.784516
SPECC1L	FGFR2	0.719814	1.67e-18	9.88e-14	1	0.719814
SPECC1L	PHLDA1	-0.76618	4.41e-22	2.87e-17	0	0.76618
SPECC1L	DUSP10	-0.614912	1.44e-12	6.34e-08	0	0.614912
SPECC1L	RMND5A	0.76027	1.4e-21	9e-17	1	0.76027
SPECC1L	ACADS	0.660021	7.88e-15	3.99e-10	1	0.660021
SPECC1L	PTPN13	-0.64713	3.82e-14	1.86e-09	0	0.64713
SPECC1L	SLC7A5	-0.75357	4.96e-21	3.16e-16	0	0.75357
SPECC1L	SLC7A11	-0.746409	1.84e-20	1.15e-15	0	0.746409
SPECC1L	CAV1	-0.557247	3.76e-10	1.32e-05	0	0.557247
SPECC1L	ASAP1	-0.663938	4.8e-15	2.46e-10	0	0.663938
SPECC1L	SRM	-0.645066	4.88e-14	2.36e-09	0	0.645066
SPECC1L	FERMT2	-0.538104	1.9e-09	6.12e-05	0	0.538104
SPECC1L	CADM1	-0.56383	2.1e-10	7.57e-06	0	0.56383
SPECC1L	LSAMP	-0.564783	1.93e-10	6.98e-06	0	0.564783
SPECC1L	QKI	-0.584256	3.18e-11	1.25e-06	0	0.584256
SPECC1L	CGN	0.499057	3.85e-08	0.00102615	1	0.499057
SPECC1L	KITLG	0.538889	1.78e-09	5.76e-05	1	0.538889
SPECC1L	CEP170	-0.606771	3.39e-12	1.45e-07	0	0.606771
SPECC1L	HSPA4L	-0.439922	1.9e-06	0.0368448	0	0.439922
HNF1A-AS1	FGFR2	0.84088	5.01e-30	3.55e-25	1	0.84088
HNF1A-AS1	PHLDA1	-0.868165	4.95e-34	3.55e-29	0	0.868165
HNF1A-AS1	DUSP10	-0.653232	1.83e-14	9.05e-10	0	0.653232
HNF1A-AS1	RMND5A	0.768971	2.53e-22	1.66e-17	1	0.768971
HNF1A-AS1	ACADS	0.785786	7.45e-24	5.01e-19	1	0.785786
HNF1A-AS1	PTPN13	-0.694812	7.37e-17	4.1e-12	0	0.694812
HNF1A-AS1	SLC7A5	-0.857597	2.21e-32	1.58e-27	0	0.857597
HNF1A-AS1	SLC7A11	-0.761983	1e-21	6.49e-17	0	0.761983
HNF1A-AS1	CAV1	-0.680501	5.45e-16	2.92e-11	0	0.680501
HNF1A-AS1	ASAP1	-0.822057	1.11e-27	7.79e-23	0	0.822057
HNF1A-AS1	SRM	-0.695065	7.11e-17	3.96e-12	0	0.695065
HNF1A-AS1	FERMT2	-0.671857	1.73e-15	9.03e-11	0	0.671857
HNF1A-AS1	CADM1	-0.669212	2.44e-15	1.27e-10	0	0.669212
HNF1A-AS1	LSAMP	-0.716502	2.82e-18	1.66e-13	0	0.716502
HNF1A-AS1	QKI	-0.755696	3.34e-21	2.13e-16	0	0.755696
HNF1A-AS1	CGN	0.679938	5.88e-16	3.14e-11	1	0.679938
HNF1A-AS1	KITLG	0.673668	1.36e-15	7.15e-11	1	0.673668
HNF1A-AS1	CEP170	-0.740668	5.1e-20	3.16e-15	0	0.740668
HNF1A-AS1	HSPA4L	-0.271605	0.00446333	1	0	0.271605
SDHAP2	FGFR2	0.626818	3.96e-13	1.81e-08	1	0.626818
SDHAP2	PHLDA1	-0.664347	4.56e-15	2.33e-10	0	0.664347
SDHAP2	DUSP10	-0.584521	3.1e-11	1.22e-06	0	0.584521
SDHAP2	RMND5A	0.615158	1.41e-12	6.18e-08	1	0.615158
SDHAP2	ACADS	0.620015	8.35e-13	3.73e-08	1	0.620015
SDHAP2	PTPN13	-0.634441	1.68e-13	7.87e-09	0	0.634441
SDHAP2	SLC7A5	-0.663922	4.81e-15	2.46e-10	0	0.663922
SDHAP2	SLC7A11	-0.671176	1.89e-15	9.86e-11	0	0.671176
SDHAP2	CAV1	-0.45345	8.3e-07	0.0173786	0	0.45345
SDHAP2	ASAP1	-0.603586	4.71e-12	1.99e-07	0	0.603586
SDHAP2	SRM	-0.536237	2.22e-09	7.08e-05	0	0.536237
SDHAP2	FERMT2	-0.423571	4.93e-06	0.0870613	0	0.423571
SDHAP2	CADM1	-0.421865	5.43e-06	0.0950273	0	0.421865
SDHAP2	LSAMP	-0.576715	6.49e-11	2.47e-06	0	0.576715
SDHAP2	QKI	-0.525839	5.1e-09	0.00015505	0	0.525839
SDHAP2	CGN	0.448667	1.12e-06	0.0227689	1	0.448667
SDHAP2	KITLG	0.447418	1.21e-06	0.0244205	1	0.447418
SDHAP2	CEP170	-0.552396	5.73e-10	1.97e-05	0	0.552396
SDHAP2	HSPA4L	-0.363838	0.000108547	1	0	0.363838
C12orf36	FGFR2	0.503638	2.76e-08	0.000752239	1	0.503638
C12orf36	PHLDA1	-0.505294	2.44e-08	0.000671068	0	0.505294
C12orf36	DUSP10	-0.302318	0.00147287	1	0	0.302318
C12orf36	RMND5A	0.621822	6.86e-13	3.08e-08	1	0.621822
C12orf36	ACADS	0.602223	5.41e-12	2.27e-07	1	0.602223
C12orf36	PTPN13	-0.448434	1.13e-06	0.0230663	0	0.448434
C12orf36	SLC7A5	-0.529575	3.79e-09	0.000117344	0	0.529575
C12orf36	SLC7A11	-0.272181	0.00437632	1	0	0.272181
C12orf36	CAV1	-0.517134	1e-08	0.00029267	0	0.517134
C12orf36	ASAP1	-0.531575	3.23e-09	0.00010098	0	0.531575
C12orf36	SRM	-0.475979	1.93e-07	0.0045701	0	0.475979
C12orf36	FERMT2	-0.615719	1.33e-12	5.84e-08	0	0.615719
C12orf36	CADM1	-0.414696	8.12e-06	0.13602	0	0.414696
C12orf36	LSAMP	-0.485936	9.76e-08	0.00243858	0	0.485936
C12orf36	QKI	-0.514638	1.21e-08	0.000349794	0	0.514638
C12orf36	CGN	0.721873	1.2e-18	7.14e-14	1	0.721873
C12orf36	KITLG	0.347827	0.000225548	1	1	0.347827
C12orf36	CEP170	-0.4646	4.08e-07	0.00908358	0	0.4646
C12orf36	HSPA4L	-0.205907	0.032524	1	0	0.205907
DLEU1	FGFR2	0.644863	5e-14	2.42e-09	1	0.644863
DLEU1	PHLDA1	-0.551924	5.96e-10	2.04e-05	0	0.551924
DLEU1	DUSP10	-0.229372	0.016945	1	0	0.229372
DLEU1	RMND5A	0.618237	1.01e-12	4.49e-08	1	0.618237
DLEU1	ACADS	0.53699	2.08e-09	6.68e-05	1	0.53699
DLEU1	PTPN13	-0.378407	5.39e-05	0.714287	0	0.378407
DLEU1	SLC7A5	-0.471914	2.53e-07	0.00585518	0	0.471914
DLEU1	SLC7A11	-0.477802	1.7e-07	0.00407901	0	0.477802
DLEU1	CAV1	-0.255932	0.00750747	1	0	0.255932
DLEU1	ASAP1	-0.417356	7e-06	0.119155	0	0.417356
DLEU1	FERMT2	-0.246823	0.0100188	1	0	0.246823
DLEU1	LSAMP	-0.311697	0.00102431	1	0	0.311697
DLEU1	QKI	-0.286251	0.00267065	1	0	0.286251
DLEU1	CGN	0.264449	0.00568058	1	1	0.264449
DLEU1	KITLG	0.689575	1.55e-16	8.53e-12	1	0.689575
DLEU1	CEP170	-0.245701	0.0103742	1	0	0.245701
KIAA0125	FGFR2	-0.764912	5.67e-22	3.68e-17	0	0.764912
KIAA0125	PHLDA1	0.781828	1.76e-23	1.17e-18	1	0.781828
KIAA0125	DUSP10	0.603614	4.69e-12	1.98e-07	1	0.603614
KIAA0125	RMND5A	-0.695966	6.24e-17	3.49e-12	0	0.695966
KIAA0125	ACADS	-0.772502	1.24e-22	8.15e-18	0	0.772502
KIAA0125	PTPN13	0.768295	2.9e-22	1.89e-17	1	0.768295
KIAA0125	SLC7A5	0.812182	1.48e-26	1.02e-21	1	0.812182
KIAA0125	SLC7A11	0.712958	4.91e-18	2.86e-13	1	0.712958
KIAA0125	CAV1	0.596255	9.86e-12	4.04e-07	1	0.596255
KIAA0125	ASAP1	0.827997	2.17e-28	1.53e-23	1	0.827997
KIAA0125	SRM	0.645758	4.5e-14	2.18e-09	1	0.645758
KIAA0125	FERMT2	0.60493	4.1e-12	1.74e-07	1	0.60493
KIAA0125	CADM1	0.700388	3.28e-17	1.85e-12	1	0.700388
KIAA0125	LSAMP	0.746356	1.86e-20	1.17e-15	1	0.746356
KIAA0125	QKI	0.750571	8.64e-21	5.47e-16	1	0.750571
KIAA0125	CGN	-0.614297	1.54e-12	6.75e-08	0	0.614297
KIAA0125	KITLG	-0.658795	9.19e-15	4.63e-10	0	0.658795
KIAA0125	CEP170	0.753131	5.39e-21	3.42e-16	1	0.753131
KIAA0125	HSPA4L	0.251671	0.00860293	1	1	0.251671
LINC01123	FGFR2	0.755868	3.23e-21	2.06e-16	1	0.755868
LINC01123	PHLDA1	-0.766111	4.47e-22	2.91e-17	0	0.766111
LINC01123	DUSP10	-0.491922	6.42e-08	0.0016492	0	0.491922
LINC01123	RMND5A	0.720947	1.39e-18	8.27e-14	1	0.720947
LINC01123	ACADS	0.760899	1.24e-21	7.99e-17	1	0.760899
LINC01123	PTPN13	-0.61138	2.1e-12	9.1e-08	0	0.61138
LINC01123	SLC7A5	-0.763747	7.12e-22	4.62e-17	0	0.763747
LINC01123	SLC7A11	-0.611264	2.12e-12	9.21e-08	0	0.611264
LINC01123	CAV1	-0.631748	2.28e-13	1.06e-08	0	0.631748
LINC01123	ASAP1	-0.784395	1.01e-23	6.77e-19	0	0.784395
LINC01123	SRM	-0.523255	6.25e-09	0.000187656	0	0.523255
LINC01123	FERMT2	-0.612259	1.91e-12	8.32e-08	0	0.612259
LINC01123	CADM1	-0.525352	5.3e-09	0.000160783	0	0.525352
LINC01123	LSAMP	-0.677103	8.61e-16	4.57e-11	0	0.677103
LINC01123	QKI	-0.720825	1.42e-18	8.43e-14	0	0.720825
LINC01123	CGN	0.697042	5.34e-17	2.99e-12	1	0.697042
LINC01123	KITLG	0.714315	3.98e-18	2.33e-13	1	0.714315
LINC01123	CEP170	-0.647273	3.75e-14	1.83e-09	0	0.647273
LINC01106	FGFR2	0.633715	1.83e-13	8.53e-09	1	0.633715
LINC01106	PHLDA1	-0.677861	7.78e-16	4.14e-11	0	0.677861
LINC01106	DUSP10	-0.593561	1.29e-11	5.23e-07	0	0.593561
LINC01106	RMND5A	0.615344	1.38e-12	6.07e-08	1	0.615344
LINC01106	ACADS	0.674001	1.3e-15	6.85e-11	1	0.674001
LINC01106	PTPN13	-0.58173	4.05e-11	1.57e-06	0	0.58173
LINC01106	SLC7A5	-0.76961	2.23e-22	1.46e-17	0	0.76961
LINC01106	SLC7A11	-0.581883	3.99e-11	1.55e-06	0	0.581883
LINC01106	CAV1	-0.682809	3.97e-16	2.14e-11	0	0.682809
LINC01106	ASAP1	-0.798749	3.94e-25	2.69e-20	0	0.798749
LINC01106	SRM	-0.713042	4.85e-18	2.83e-13	0	0.713042
LINC01106	FERMT2	-0.653409	1.79e-14	8.87e-10	0	0.653409
LINC01106	CADM1	-0.664362	4.55e-15	2.33e-10	0	0.664362
LINC01106	LSAMP	-0.720869	1.41e-18	8.37e-14	0	0.720869
LINC01106	QKI	-0.791829	1.94e-24	1.32e-19	0	0.791829
LINC01106	CGN	0.718766	1.97e-18	1.17e-13	1	0.718766
LINC01106	KITLG	0.639129	9.8e-14	4.65e-09	1	0.639129
LINC01106	CEP170	-0.704314	1.83e-17	1.04e-12	0	0.704314
PP7080	FGFR2	0.38597	3.7e-05	0.515397	1	0.38597
PP7080	PHLDA1	-0.335597	0.000384354	1	0	0.335597
PP7080	RMND5A	0.438734	2.04e-06	0.0392492	1	0.438734
PP7080	ACADS	0.436269	2.36e-06	0.0448902	1	0.436269
PP7080	SLC7A5	-0.286976	0.00260178	1	0	0.286976
PP7080	CAV1	-0.502102	3.09e-08	0.000835455	0	0.502102
PP7080	ASAP1	-0.385497	3.79e-05	0.526559	0	0.385497
PP7080	SRM	-0.40028	1.77e-05	0.271623	0	0.40028
PP7080	FERMT2	-0.545036	1.07e-09	3.55e-05	0	0.545036
PP7080	CADM1	-0.391221	2.83e-05	0.409143	0	0.391221
PP7080	LSAMP	-0.33452	0.000402412	1	0	0.33452
PP7080	QKI	-0.427584	3.92e-06	0.070836	0	0.427584
PP7080	CGN	0.656964	1.15e-14	5.79e-10	1	0.656964
PP7080	KITLG	0.233115	0.015184	1	1	0.233115
PP7080	CEP170	-0.332086	0.000446137	1	0	0.332086
PP7080	HSPA4L	-0.201468	0.0365422	1	0	0.201468
P2RX5	FGFR2	-0.593049	1.35e-11	5.49e-07	0	0.593049
P2RX5	PHLDA1	0.620874	7.61e-13	3.41e-08	1	0.620874
P2RX5	DUSP10	0.574532	7.95e-11	2.99e-06	1	0.574532
P2RX5	RMND5A	-0.572984	9.17e-11	3.43e-06	0	0.572984
P2RX5	ACADS	-0.6358	1.44e-13	6.76e-09	0	0.6358
P2RX5	PTPN13	0.659775	8.13e-15	4.11e-10	1	0.659775
P2RX5	SLC7A5	0.688106	1.91e-16	1.04e-11	1	0.688106
P2RX5	SLC7A11	0.535291	2.39e-09	7.61e-05	1	0.535291
P2RX5	CAV1	0.491768	6.49e-08	0.00166603	1	0.491768
P2RX5	ASAP1	0.714243	4.02e-18	2.35e-13	1	0.714243
P2RX5	SRM	0.618962	9.36e-13	4.16e-08	1	0.618962
P2RX5	FERMT2	0.554571	4.75e-10	1.64e-05	1	0.554571
P2RX5	CADM1	0.633629	1.84e-13	8.61e-09	1	0.633629
P2RX5	LSAMP	0.806366	6.31e-26	4.36e-21	1	0.806366
P2RX5	QKI	0.699145	3.93e-17	2.21e-12	1	0.699145
P2RX5	CGN	-0.57278	9.34e-11	3.49e-06	0	0.57278
P2RX5	KITLG	-0.619354	8.97e-13	4e-08	0	0.619354
P2RX5	CEP170	0.720545	1.49e-18	8.81e-14	1	0.720545
P2RX5	HSPA4L	0.205832	0.0325881	1	1	0.205832
LOC254896	FGFR2	-0.748746	1.21e-20	7.6e-16	0	0.748746
LOC254896	PHLDA1	0.776842	5.05e-23	3.35e-18	1	0.776842
LOC254896	DUSP10	0.529794	3.73e-09	0.000115429	1	0.529794
LOC254896	RMND5A	-0.705047	1.64e-17	9.38e-13	0	0.705047
LOC254896	ACADS	-0.683056	3.84e-16	2.07e-11	0	0.683056
LOC254896	PTPN13	0.604448	4.31e-12	1.82e-07	1	0.604448
LOC254896	SLC7A5	0.796444	6.75e-25	4.6e-20	1	0.796444
LOC254896	SLC7A11	0.697393	5.08e-17	2.85e-12	1	0.697393
LOC254896	CAV1	0.653718	1.72e-14	8.55e-10	1	0.653718
LOC254896	ASAP1	0.819233	2.37e-27	1.65e-22	1	0.819233
LOC254896	SRM	0.582303	3.83e-11	1.49e-06	1	0.582303
LOC254896	FERMT2	0.582042	3.93e-11	1.53e-06	1	0.582042
LOC254896	CADM1	0.559509	3.08e-10	1.09e-05	1	0.559509
LOC254896	LSAMP	0.584954	2.98e-11	1.17e-06	1	0.584954
LOC254896	QKI	0.728347	4.17e-19	2.51e-14	1	0.728347
LOC254896	CGN	-0.616733	1.19e-12	5.25e-08	0	0.616733
LOC254896	KITLG	-0.628937	3.13e-13	1.44e-08	0	0.628937
LOC254896	CEP170	0.708493	9.75e-18	5.62e-13	1	0.708493
LOC254896	HSPA4L	0.222184	0.0208273	1	1	0.222184
MIR155HG	FGFR2	-0.721669	1.24e-18	7.38e-14	0	0.721669
MIR155HG	PHLDA1	0.769354	2.34e-22	1.53e-17	1	0.769354
MIR155HG	DUSP10	0.634467	1.68e-13	7.85e-09	1	0.634467
MIR155HG	RMND5A	-0.64374	5.71e-14	2.75e-09	0	0.64374
MIR155HG	ACADS	-0.741929	4.09e-20	2.54e-15	0	0.741929
MIR155HG	PTPN13	0.677789	7.85e-16	4.18e-11	1	0.677789
MIR155HG	SLC7A5	0.76711	3.67e-22	2.39e-17	1	0.76711
MIR155HG	SLC7A11	0.669268	2.42e-15	1.26e-10	1	0.669268
MIR155HG	CAV1	0.607303	3.21e-12	1.37e-07	1	0.607303
MIR155HG	ASAP1	0.835407	2.58e-29	1.83e-24	1	0.835407
MIR155HG	SRM	0.619989	8.37e-13	3.74e-08	1	0.619989
MIR155HG	FERMT2	0.630633	2.59e-13	1.2e-08	1	0.630633
MIR155HG	CADM1	0.632426	2.11e-13	9.83e-09	1	0.632426
MIR155HG	LSAMP	0.730514	2.9e-19	1.76e-14	1	0.730514
MIR155HG	QKI	0.78664	6.18e-24	4.16e-19	1	0.78664
MIR155HG	CGN	-0.644434	5.26e-14	2.54e-09	0	0.644434
MIR155HG	KITLG	-0.658545	9.48e-15	4.78e-10	0	0.658545
MIR155HG	CEP170	0.838538	1.02e-29	7.21e-25	1	0.838538
MIR155HG	HSPA4L	0.239649	0.0124882	1	1	0.239649
LOC100506990	FGFR2	0.530717	3.46e-09	0.000107703	1	0.530717
LOC100506990	PHLDA1	-0.626818	3.96e-13	1.81e-08	0	0.626818
LOC100506990	DUSP10	-0.500298	3.52e-08	0.000943694	0	0.500298
LOC100506990	RMND5A	0.509531	1.78e-08	0.000501288	1	0.509531
LOC100506990	ACADS	0.432129	3.01e-06	0.0558766	1	0.432129
LOC100506990	PTPN13	-0.451595	9.32e-07	0.0193371	0	0.451595
LOC100506990	SLC7A5	-0.7117	5.96e-18	3.47e-13	0	0.7117
LOC100506990	SLC7A11	-0.574474	7.99e-11	3.01e-06	0	0.574474
LOC100506990	CAV1	-0.483251	1.17e-07	0.00289745	0	0.483251
LOC100506990	ASAP1	-0.579472	5.01e-11	1.93e-06	0	0.579472
LOC100506990	SRM	-0.720421	1.51e-18	8.98e-14	0	0.720421
LOC100506990	FERMT2	-0.450615	9.9e-07	0.0204261	0	0.450615
LOC100506990	CADM1	-0.59686	9.28e-12	3.82e-07	0	0.59686
LOC100506990	LSAMP	-0.546754	9.26e-10	3.1e-05	0	0.546754
LOC100506990	QKI	-0.549358	7.42e-10	2.51e-05	0	0.549358
LOC100506990	CGN	0.421166	5.65e-06	0.0985203	1	0.421166
LOC100506990	KITLG	0.505779	2.36e-08	0.000649147	1	0.505779
LOC100506990	CEP170	-0.506713	2.2e-08	0.000608775	0	0.506713
LOC100506990	HSPA4L	-0.299182	0.00165867	1	0	0.299182
LINC00152	FGFR2	-0.770578	1.83e-22	1.2e-17	0	0.770578
LINC00152	PHLDA1	0.826237	3.54e-28	2.49e-23	1	0.826237
LINC00152	DUSP10	0.634597	1.65e-13	7.73e-09	1	0.634597
LINC00152	RMND5A	-0.706211	1.38e-17	7.89e-13	0	0.706211
LINC00152	ACADS	-0.731797	2.34e-19	1.42e-14	0	0.731797
LINC00152	PTPN13	0.72586	6.28e-19	3.77e-14	1	0.72586
LINC00152	SLC7A5	0.852977	1.06e-31	7.55e-27	1	0.852977
LINC00152	SLC7A11	0.804263	1.06e-25	7.26e-21	1	0.804263
LINC00152	CAV1	0.582416	3.79e-11	1.48e-06	1	0.582416
LINC00152	ASAP1	0.830548	1.06e-28	7.44e-24	1	0.830548
LINC00152	SRM	0.61109	2.16e-12	9.38e-08	1	0.61109
LINC00152	FERMT2	0.572199	9.85e-11	3.68e-06	1	0.572199
LINC00152	CADM1	0.558622	3.33e-10	1.17e-05	1	0.558622
LINC00152	LSAMP	0.661579	6.48e-15	3.29e-10	1	0.661579
LINC00152	QKI	0.735546	1.24e-19	7.59e-15	1	0.735546
LINC00152	CGN	-0.539752	1.66e-09	5.38e-05	0	0.539752
LINC00152	KITLG	-0.642527	6.59e-14	3.16e-09	0	0.642527
LINC00152	CEP170	0.730133	3.09e-19	1.88e-14	1	0.730133
LINC00152	HSPA4L	0.219545	0.0224327	1	1	0.219545
