# Supplementary material for: Bioinformatics analysis of oxidative stress genes in the pathogenesis of ulcerative colitis based on a competing endogenous RNA regulatory network
Source: PeerJ. 2024 Aug 16;12:e17213. doi: 10.7717/peerj.17213 (PMC11332386; doi:10.7717/peerj.17213)
Supplement: Supplemental Information 10 — (A) differentially expressed mRNA in cluster 1 and 2 from GSE75214. (B) GO and KEGG enrichment analysis for cluster 1. (C) GO and KEGG enrichment analysis for cluster 2. [file peerj-12-17213-s010.xlsx]

## Sheet: Table of contents
Supplementary Table S5-list of representative genes and GO and KEGG enrichment analysis in GSE75214 dataset
A differentially expressed mRNA in cluster 1 and 2 from GSE75214
B GO and KEGG enrichment analysis for cluster 1
C GO and KEGG enrichment analysis for cluster 2

## Sheet: A
	logFC	AveExpr	t	P.Value	adj.P.Val	B
IGKV1OR9-1	1.34842	9.40006	16.6525	2.12e-30	4.81e-26	58.603
PIM2	2.3568	9.40303	16.2621	1.18e-29	1.01e-25	56.9139
IGKV1OR9-2	1.45599	10.0081	16.2343	1.34e-29	1.01e-25	56.7929
IGKV2D-28	1.70465	12.7449	16.0789	2.67e-29	1.52e-25	56.1139
IGKV3OR2-268	2.2458	9.80861	15.9315	5.15e-29	2.22e-25	55.4673
IGKV1D-42	1.41094	13.1326	15.902	5.88e-29	2.22e-25	55.3379
IGKV3D-20	2.3855	11.4841	15.8616	7.04e-29	2.29e-25	55.1597
SLC26A2	-3.42168	8.70073	-15.6281	2.01e-28	5.71e-25	54.1277
MIR8071-1	1.94696	10.1794	15.5807	2.49e-28	6.29e-25	53.9173
LOC102724453	1.75827	12.4861	15.5045	3.52e-28	7.99e-25	53.5784
POU2AF1	1.49844	7.95249	15.4657	4.19e-28	8.65e-25	53.4056
MMP3	4.27171	8.9216	15.4085	5.43e-28	1e-24	53.1503
LAX1	2.00017	7.73267	15.3969	5.73e-28	1e-24	53.0989
SLC7A11	2.0906	8.38745	15.3464	7.2e-28	1.17e-24	52.8731
FCRL5	2.14402	7.28078	15.3287	7.81e-28	1.18e-24	52.7937
CD44	1.10386	10.4107	15.2727	1.01e-27	1.43e-24	52.5431
IGKV3D-11	2.44908	11.3394	15.2315	1.22e-27	1.62e-24	52.3585
CHI3L1	3.54143	9.09196	15.2107	1.34e-27	1.69e-24	52.2651
OSMR	2.22892	8.6152	15.1294	1.94e-27	2.31e-24	51.8996
IRF4	1.79758	8.45562	15.1053	2.16e-27	2.46e-24	51.7912
SLAMF7	2.08888	8.14021	14.9866	3.73e-27	4.03e-24	51.2557
MZB1	1.85191	8.77361	14.9047	5.43e-27	5.6e-24	50.885
KYNU	2.7954	7.72956	14.8412	7.27e-27	7.18e-24	50.5972
IGKC	1.81577	11.5233	14.7254	1.24e-26	1.17e-23	50.0712
ANXA1	2.04936	11.1095	14.611	2.11e-26	1.91e-23	49.5497
CD38	1.75505	8.08068	14.49	3.69e-26	3.23e-23	48.9965
IGKV1D-16	1.4869	10.8614	14.4749	3.96e-26	3.33e-23	48.9275
KLHL6	1.43267	8.13771	14.4609	4.23e-26	3.43e-23	48.8634
LOC642131	2.24142	9.97527	14.4511	4.43e-26	3.47e-23	48.8182
DRAM1	1.43999	8.08804	14.2641	1.06e-25	8.01e-23	47.9589
IGKV1D-43	2.17387	11.4797	14.1866	1.52e-25	1.11e-22	47.6013
EVI2B	1.56386	9.66502	14.179	1.58e-25	1.12e-22	47.5663
IGKV2D-24	2.19858	10.4405	14.1391	1.9e-25	1.31e-22	47.3819
IGKV1D-33	2.03183	10.9821	13.9878	3.87e-25	2.51e-22	46.681
IGHV4-59	1.97884	12.2634	13.896	5.97e-25	3.66e-22	46.2544
IGKV1OR2-108	1.26261	7.65157	13.8475	7.5e-25	4.48e-22	46.0287
IFNAR2	1.15242	7.78308	13.8399	7.78e-25	4.53e-22	45.9933
SRGN	1.83976	9.31046	13.821	8.5e-25	4.83e-22	45.9053
DERL3	1.31461	8.15067	13.8056	9.14e-25	5.06e-22	45.8338
LYN	1.21329	9.81672	13.7999	9.39e-25	5.08e-22	45.807
MSN	1.46135	9.92782	13.7167	1.39e-24	7.36e-22	45.4186
HIF1A	1.114	11.1258	13.6962	1.53e-24	7.92e-22	45.323
IGKV1OR2-3	2.564	11.1038	13.6854	1.62e-24	8.15e-22	45.2725
S100A8	3.6977	8.25919	13.6798	1.66e-24	8.19e-22	45.2462
IGLV6-57	2.33564	8.95228	13.6339	2.06e-24	9.79e-22	45.0314
CCDC69	1.24121	7.69656	13.6333	2.07e-24	9.79e-22	45.0287
MMP1	3.73135	9.23494	13.6048	2.37e-24	1.1e-21	44.8954
RASGRP3	1.62974	6.90129	13.5721	2.77e-24	1.26e-21	44.742
CNNM2	-1.00933	7.80971	-13.5225	3.5e-24	1.56e-21	44.5094
IGHV3-35	1.30808	10.4446	13.5102	3.71e-24	1.62e-21	44.4515
IGHV3OR16-8	1.50048	9.88345	13.5054	3.8e-24	1.63e-21	44.4287
PRDM1	1.56491	9.53624	13.4872	4.15e-24	1.74e-21	44.3433
SLC7A5	1.4594	8.45016	13.48	4.29e-24	1.77e-21	44.3096
CYTIP	1.85535	8.12224	13.4723	4.45e-24	1.8e-21	44.2735
AQP8	-3.16006	7.25876	-13.4686	4.53e-24	1.8e-21	44.2559
IGHV3-73	1.89229	11.8849	13.4394	5.2e-24	2.04e-21	44.119
GLCCI1	1.32	8.6712	13.3931	6.49e-24	2.5e-21	43.9011
RAC2	1.18143	9.80384	13.3355	8.55e-24	3.18e-21	43.6296
SLFN11	1.57248	7.69797	13.3083	9.73e-24	3.57e-21	43.5011
IGHV3-74	1.66366	12.3568	13.299	1.02e-23	3.67e-21	43.4574
PITPNC1	1.08046	8.6887	13.2254	1.45e-23	4.98e-21	43.1096
EAF2	1.20541	7.43445	13.2191	1.49e-23	5.06e-21	43.0798
ALOX5	1.38305	8.7093	13.1101	2.52e-23	8.33e-21	42.5639
CD180	2.08864	7.26537	13.0863	2.82e-23	9.16e-21	42.4511
KCNA3	1.60348	7.34482	13.0744	2.99e-23	9.51e-21	42.3948
IGKV2D-26	2.77679	9.66586	13.0725	3.02e-23	9.51e-21	42.3859
IGKV2D-18	1.49504	7.79202	13.0665	3.1e-23	9.65e-21	42.3574
SERPINB9	1.65064	8.86724	13.0407	3.51e-23	1.06e-20	42.2349
CXorf21	1.47415	5.69715	12.9988	4.3e-23	1.28e-20	42.0357
MMP9	2.17208	8.7631	12.9859	4.58e-23	1.35e-20	41.9744
STX11	1.64985	8.09977	12.9824	4.65e-23	1.35e-20	41.9579
CHST15	1.44666	8.12814	12.9636	5.09e-23	1.45e-20	41.8686
TNFRSF17	1.75797	6.43051	12.9448	5.58e-23	1.56e-20	41.7791
TNFRSF9	1.54325	7.11687	12.9326	5.91e-23	1.64e-20	41.7212
MMP12	2.76791	9.28896	12.9121	6.53e-23	1.79e-20	41.6233
FUT8	1.06301	8.9995	12.896	7.06e-23	1.91e-20	41.5467
IL10RA	1.26991	8.19361	12.8817	7.56e-23	2.02e-20	41.4788
SLC6A6	1.35923	8.29317	12.8775	7.72e-23	2.04e-20	41.4586
BMP3	-1.85229	6.83562	-12.8512	8.76e-23	2.26e-20	41.3334
PADI2	-2.34443	9.11409	-12.8394	9.28e-23	2.34e-20	41.277
IGHV3OR16-7	1.75298	11.6189	12.8242	9.98e-23	2.49e-20	41.2047
CTLA4	1.12202	6.19736	12.8214	1.01e-22	2.5e-20	41.1915
RNF152	-1.31074	7.87562	-12.7617	1.35e-22	3.3e-20	40.9065
CASP4	1.07348	8.26472	12.7315	1.56e-22	3.78e-20	40.7621
PPARGC1A	-1.65914	7.53376	-12.7238	1.62e-22	3.84e-20	40.7253
KLHL5	1.7051	7.09487	12.7201	1.65e-22	3.87e-20	40.7077
ASAP1	1.18255	8.56684	12.696	1.86e-22	4.3e-20	40.5925
VIPR1	-1.64887	8.56786	-12.6812	1.99e-22	4.57e-20	40.5219
NXPE3	1.2628	6.76942	12.6557	2.26e-22	5.07e-20	40.3998
LILRB1	1.19265	7.61423	12.6186	2.7e-22	6.02e-20	40.2219
PDK1	1.17366	9.03715	12.5976	2.99e-22	6.56e-20	40.1214
HAPLN3	1.11798	7.35232	12.558	3.63e-22	7.84e-20	39.9315
ELL2P1	1.1602	7.93987	12.5483	3.8e-22	8.14e-20	39.8853
IGHV3OR15-7	1.66773	6.41505	12.5349	4.06e-22	8.49e-20	39.8208
CXCL1	2.29931	10.3834	12.5341	4.07e-22	8.49e-20	39.8168
EMR2	1.7402	7.89545	12.5312	4.13e-22	8.53e-20	39.8029
ANXA5	1.02834	10.3651	12.5269	4.22e-22	8.63e-20	39.7826
TRPM6	-2.22877	7.3728	-12.5031	4.73e-22	9.6e-20	39.6681
FKBP11	1.10182	8.21213	12.4907	5.03e-22	1e-19	39.6087
THEMIS2	1.38697	7.97949	12.4616	5.79e-22	1.14e-19	39.469
PDPN	1.24185	7.26985	12.4524	6.06e-22	1.18e-19	39.4246
TLR6	1.43393	6.69179	12.4448	6.29e-22	1.21e-19	39.388
DOCK2	1.42643	7.96117	12.4407	6.41e-22	1.21e-19	39.3687
ATP13A4	-1.07804	5.89804	-12.4116	7.39e-22	1.39e-19	39.2286
CD53	1.74124	9.42304	12.372	8.97e-22	1.66e-19	39.0379
IFI30	1.22471	10.1635	12.3613	9.44e-22	1.73e-19	38.9866
CHP2	-2.25001	7.74643	-12.3525	9.86e-22	1.79e-19	38.944
TRIB2	1.30636	7.76124	12.3443	1.03e-21	1.85e-19	38.9049
ELOVL5	1.40018	8.94181	12.3313	1.09e-21	1.94e-19	38.8421
ISX	-1.59102	7.33992	-12.3185	1.16e-21	2.05e-19	38.7802
IGKV1-13	1.59098	9.86787	12.3155	1.18e-21	2.06e-19	38.766
IFI16	1.14334	8.56797	12.2842	1.38e-21	2.37e-19	38.6151
IGHV3-7	1.2282	13.3157	12.2836	1.38e-21	2.37e-19	38.6122
RAB31	1.56731	9.82404	12.2531	1.6e-21	2.73e-19	38.4654
TIMP1	1.48518	11.3602	12.2354	1.75e-21	2.92e-19	38.3797
SLA	1.31905	7.16773	12.183	2.26e-21	3.71e-19	38.1266
PLAU	1.93149	8.75817	12.1141	3.16e-21	5.02e-19	37.794
TMIGD1	-2.93736	7.21698	-12.1123	3.19e-21	5.03e-19	37.7849
ICAM1	1.81845	8.92657	12.1031	3.34e-21	5.23e-19	37.7405
IGKV6-21	2.65144	8.59703	12.0556	4.21e-21	6.46e-19	37.5108
CHST11	1.22516	8.88632	12.0299	4.78e-21	7.28e-19	37.3861
MMP10	2.18817	6.67508	12.0218	4.97e-21	7.53e-19	37.3469
CSF2RB	1.42215	8.39114	12.0194	5.03e-21	7.56e-19	37.3357
FAM49A	1.41792	7.82343	12.0123	5.21e-21	7.78e-19	37.301
IGHV3-52	1.36789	13.4006	11.9893	5.83e-21	8.65e-19	37.1898
FCGR3A	1.7304	7.36523	11.9879	5.87e-21	8.66e-19	37.1828
RN7SKP35	-1.04675	5.5023	-11.9852	5.95e-21	8.68e-19	37.1699
IL2RA	1.58336	7.3244	11.9847	5.96e-21	8.68e-19	37.1672
CAPN13	-1.91066	6.80478	-11.9599	6.73e-21	9.68e-19	37.0473
FADS1	1.45998	7.65575	11.9462	7.2e-21	1.03e-18	36.9808
NAMPT	1.3335	11.2309	11.9421	7.35e-21	1.04e-18	36.9609
CYTH4	1.34628	8.07566	11.9006	9.01e-21	1.25e-18	36.7596
GMFG	1.3842	8.18195	11.8935	9.33e-21	1.28e-18	36.7252
MYO5A	1.09733	7.04978	11.8914	9.43e-21	1.29e-18	36.7148
STEAP4	2.2646	7.50228	11.8906	9.47e-21	1.29e-18	36.7109
ACSF2	-1.53765	7.51767	-11.8674	1.06e-20	1.43e-18	36.5981
WARS	1.60688	10.1374	11.8622	1.09e-20	1.45e-18	36.5728
PCK1	-3.03201	7.82834	-11.8497	1.16e-20	1.53e-18	36.5121
IGHV3-43	1.24487	12.8471	11.8452	1.18e-20	1.55e-18	36.4905
ENTPD1	1.50079	8.64462	11.8364	1.24e-20	1.61e-18	36.4475
HSPA13	1.08798	7.89462	11.8304	1.27e-20	1.65e-18	36.4187
CD80	1.33272	6.43577	11.8237	1.32e-20	1.69e-18	36.3859
FCGR2B	1.59225	8.26069	11.8227	1.32e-20	1.69e-18	36.3813
CDK14	1.32145	7.31478	11.8169	1.36e-20	1.73e-18	36.3529
FCGR2A	2.4033	7.88842	11.8156	1.37e-20	1.73e-18	36.3465
LY96	1.84448	6.89063	11.8135	1.38e-20	1.74e-18	36.3362
BEST2	-2.09331	7.39437	-11.8022	1.46e-20	1.82e-18	36.2817
ST3GAL1	1.42619	8.23689	11.7791	1.64e-20	2.01e-18	36.169
ACSL4	2.08015	8.12153	11.7755	1.67e-20	2.04e-18	36.1517
ORAI2	1.15953	7.9942	11.7721	1.7e-20	2.06e-18	36.1352
UGT2A3	-2.36833	5.346	-11.7348	2.04e-20	2.45e-18	35.9538
MMP7	3.0702	7.71089	11.7304	2.08e-20	2.49e-18	35.932
PHLDA1	1.31124	8.88877	11.7113	2.29e-20	2.69e-18	35.8394
CDHR1	-2.09629	7.50892	-11.6936	2.5e-20	2.86e-18	35.7529
SACS	1.02015	6.30658	11.6922	2.51e-20	2.86e-18	35.7464
SP140	1.23385	7.08515	11.6922	2.51e-20	2.86e-18	35.7463
WIPF1	1.23092	9.22448	11.6921	2.52e-20	2.86e-18	35.7458
ST8SIA4	1.44845	6.94488	11.6877	2.57e-20	2.9e-18	35.7245
BASP1	1.12315	9.3281	11.6806	2.66e-20	2.99e-18	35.6895
HCLS1	1.24592	7.67987	11.6749	2.74e-20	3.06e-18	35.6617
RHOH	1.58048	7.7721	11.6713	2.79e-20	3.1e-18	35.6444
ABCB1	-1.6899	7.25338	-11.6687	2.82e-20	3.11e-18	35.6318
DOCK8	1.3256	8.23672	11.6687	2.82e-20	3.11e-18	35.6317
IFITM2	1.11662	8.96111	11.6506	3.09e-20	3.34e-18	35.5435
IGKV1D-27	2.67131	9.78982	11.6483	3.12e-20	3.36e-18	35.5324
AQP9	3.23514	7.70504	11.6292	3.43e-20	3.68e-18	35.4393
OTOP2	-2.15563	8.06179	-11.6179	3.63e-20	3.87e-18	35.3843
ZBP1	1.24328	8.05265	11.6012	3.94e-20	4.13e-18	35.3025
BTK	1.35824	6.42842	11.5997	3.97e-20	4.13e-18	35.2955
LCP1	1.65006	9.76343	11.5928	4.11e-20	4.26e-18	35.262
PLA2G7	1.86886	8.5027	11.5076	6.26e-20	6.37e-18	34.8459
PDCD1LG2	1.39104	6.89565	11.4774	7.27e-20	7.3e-18	34.6984
CEP128	1.12424	6.96157	11.4671	7.64e-20	7.61e-18	34.6483
NCKAP1L	1.36447	7.86936	11.4476	8.42e-20	8.2e-18	34.553
ADAM19	1.20642	8.31827	11.3799	1.18e-19	1.11e-17	34.2216
SGK2	-1.28585	8.02532	-11.3753	1.2e-19	1.13e-17	34.1994
MFSD4	-1.77271	8.44615	-11.3669	1.26e-19	1.17e-17	34.1584
IGHV1OR15-1	2.87273	9.4153	11.3651	1.27e-19	1.18e-17	34.1492
MAOA	-1.50211	8.58899	-11.3572	1.32e-19	1.22e-17	34.1106
MB21D1	1.0722	7.01559	11.3506	1.36e-19	1.25e-17	34.0786
TRABD2A	-1.06722	8.61874	-11.3498	1.37e-19	1.25e-17	34.0746
EPHX2	-1.41347	7.18418	-11.3419	1.42e-19	1.29e-17	34.0358
CXCL8	2.86338	8.67999	11.3386	1.44e-19	1.31e-17	34.0197
FLI1	1.17504	7.49242	11.308	1.68e-19	1.51e-17	33.87
CD79A	2.05615	9.4727	11.2795	1.94e-19	1.71e-17	33.7303
IGKV1D-8	1.62655	7.1632	11.2707	2.02e-19	1.77e-17	33.6873
PTPRC	1.69809	8.64378	11.2682	2.05e-19	1.78e-17	33.6748
OAS2	1.20946	8.12025	11.2624	2.11e-19	1.81e-17	33.6467
ARNTL2	1.22208	7.66322	11.2513	2.23e-19	1.9e-17	33.592
NCF2	1.85999	7.57562	11.23	2.47e-19	2.1e-17	33.4879
PECAM1	1.6534	10.0482	11.2145	2.67e-19	2.24e-17	33.4117
FSTL1	1.45599	9.48824	11.2104	2.73e-19	2.28e-17	33.3915
ZNF704	-1.26585	7.03827	-11.2029	2.83e-19	2.35e-17	33.3548
C1R	1.4458	9.3043	11.2015	2.85e-19	2.35e-17	33.3483
CD86	1.26574	6.55602	11.1878	3.05e-19	2.51e-17	33.2808
HGF	1.75124	6.82658	11.1855	3.09e-19	2.53e-17	33.2697
RAPGEFL1	-1.26359	8.88124	-11.1806	3.16e-19	2.58e-17	33.2454
SELPLG	1.33802	8.36803	11.1741	3.27e-19	2.65e-17	33.2135
JAK3	1.11983	7.47533	11.1584	3.53e-19	2.84e-17	33.1367
CDKN2B	-1.07516	8.44758	-11.1494	3.69e-19	2.95e-17	33.0925
ELMO1	1.27945	8.27835	11.1459	3.76e-19	2.98e-17	33.0751
SELP	1.9467	7.32452	11.1393	3.88e-19	3.07e-17	33.0431
FGFR2	-1.01206	6.74369	-11.1384	3.9e-19	3.08e-17	33.0386
SLC43A3	1.22793	8.52671	11.1325	4.02e-19	3.16e-17	33.0097
CWH43	-2.41342	6.82264	-11.122	4.23e-19	3.3e-17	32.9581
DHRS11	-1.70736	9.35077	-11.1182	4.31e-19	3.35e-17	32.9396
PIK3CG	1.10056	7.7782	11.1099	4.5e-19	3.48e-17	32.8985
GNA15	1.0861	8.56068	11.1053	4.6e-19	3.55e-17	32.8763
TFEC	1.11088	5.93902	11.0777	5.28e-19	4.03e-17	32.7405
IRAK3	1.62911	7.84223	11.0747	5.35e-19	4.08e-17	32.726
ZBTB7C	-1.02306	8.56637	-11.0593	5.78e-19	4.36e-17	32.6503
FAM162A	-1.03286	7.90143	-11.0562	5.87e-19	4.41e-17	32.6348
SLC22A5	-1.14935	8.11261	-11.041	6.33e-19	4.7e-17	32.5603
F2R	1.14217	7.7568	11.0231	6.92e-19	5.12e-17	32.4722
GLIPR1	1.67363	8.64919	11.0107	7.36e-19	5.39e-17	32.4116
HMGCS2	-2.96539	8.44694	-11.0023	7.68e-19	5.6e-17	32.37
GPR183	1.3462	6.99345	10.9695	9.03e-19	6.56e-17	32.209
CLCN2	-1.09631	8.49852	-10.9635	9.31e-19	6.73e-17	32.1795
GBP4	1.78209	7.96335	10.9149	1.19e-18	8.44e-17	31.9405
TCN1	2.89314	7.87927	10.9133	1.2e-18	8.46e-17	31.9324
ITGAX	1.70248	7.99863	10.9131	1.2e-18	8.46e-17	31.9317
GUCA2A	-2.74731	9.55515	-10.9057	1.24e-18	8.7e-17	31.8951
BIN2	1.1957	7.07876	10.8944	1.31e-18	9.15e-17	31.8397
CD274	2.02422	6.99067	10.893	1.32e-18	9.19e-17	31.8325
VNN2	2.33221	6.73883	10.888	1.36e-18	9.39e-17	31.8082
TNC	2.35238	9.04658	10.853	1.61e-18	1.11e-16	31.6357
ADH1C	-2.64285	9.02621	-10.8486	1.65e-18	1.14e-16	31.614
NCF4	1.22881	8.13864	10.8295	1.81e-18	1.23e-16	31.5203
TLR4	1.40452	8.23799	10.8209	1.89e-18	1.28e-16	31.4778
BGN	1.81849	9.42352	10.8131	1.97e-18	1.32e-16	31.4396
CEP170	1.40078	6.93256	10.8115	1.99e-18	1.33e-16	31.4315
CTSK	1.70764	9.05119	10.7939	2.17e-18	1.44e-16	31.3451
SELE	2.59169	7.09303	10.7898	2.21e-18	1.46e-16	31.3247
P2RY8	1.1657	6.98184	10.7878	2.23e-18	1.47e-16	31.3148
CD27	1.42823	8.47844	10.7862	2.25e-18	1.48e-16	31.3068
IGLV9-49	1.54318	9.32693	10.7758	2.37e-18	1.56e-16	31.2557
ARHGDIB	1.24359	9.27564	10.752	2.67e-18	1.73e-16	31.1384
SYTL2	-1.35126	8.3636	-10.7326	2.94e-18	1.89e-16	31.0427
SERPINE2	1.38312	7.59594	10.7322	2.95e-18	1.89e-16	31.0408
RASGRP1	1.11635	7.33156	10.7156	3.2e-18	2.04e-16	30.959
NNMT	1.34292	8.34112	10.714	3.23e-18	2.05e-16	30.9511
CXCR1	2.35158	6.74006	10.7077	3.33e-18	2.11e-16	30.92
CPA6	-1.48972	5.39901	-10.7023	3.42e-18	2.16e-16	30.8938
CCDC88A	1.28281	6.9277	10.688	3.68e-18	2.28e-16	30.823
PCSK5	-1.07927	8.29038	-10.6869	3.7e-18	2.28e-16	30.8176
TGFB1	1.01988	7.87101	10.6789	3.85e-18	2.37e-16	30.778
IGKV2D-40	3.52866	7.49576	10.6273	4.98e-18	2.98e-16	30.5239
ARHGAP25	1.04668	7.10939	10.6237	5.07e-18	3.02e-16	30.5062
GBP5	2.08604	7.50674	10.62	5.16e-18	3.06e-16	30.4877
EXPH5	-1.80057	7.5685	-10.5904	5.99e-18	3.5e-16	30.3416
IKZF1	1.29038	7.16463	10.5848	6.15e-18	3.58e-16	30.3141
SAMSN1	1.39709	6.03265	10.58	6.3e-18	3.65e-16	30.2905
RHOQP2	1.06166	9.49441	10.5676	6.71e-18	3.88e-16	30.2291
MX2	1.32757	7.29139	10.5567	7.08e-18	4.06e-16	30.1755
PRR15	-1.13619	9.49807	-10.5558	7.11e-18	4.07e-16	30.1712
CXCL10	2.77341	8.16164	10.5529	7.22e-18	4.11e-16	30.157
IDO1	2.97391	8.23081	10.5502	7.32e-18	4.15e-16	30.1433
LILRB4	1.26978	7.62633	10.545	7.51e-18	4.25e-16	30.118
ALDH1L2	1.38787	6.69517	10.5383	7.76e-18	4.38e-16	30.0849
SLC9B2	1.20924	6.81269	10.5345	7.91e-18	4.45e-16	30.0661
APOBEC3G	1.09091	6.80697	10.5086	9.01e-18	5.04e-16	29.938
IKZF3	1.32576	7.70756	10.5049	9.18e-18	5.1e-16	29.9197
LILRB2	1.38589	7.72158	10.5033	9.25e-18	5.12e-16	29.912
ITGB2	1.23558	8.59068	10.4979	9.5e-18	5.24e-16	29.8855
VSIG1	2.99997	7.76991	10.4904	9.86e-18	5.42e-16	29.8482
TGFBI	1.36447	9.76579	10.4849	1.01e-17	5.56e-16	29.8214
SAMHD1	1.10478	8.9798	10.4757	1.06e-17	5.79e-16	29.7758
PDE4B	1.06433	6.9636	10.4579	1.16e-17	6.27e-16	29.6878
GNB4	1.01799	7.0702	10.4472	1.22e-17	6.57e-16	29.6352
SEMA7A	1.08931	7.83371	10.4432	1.25e-17	6.69e-16	29.6155
CSGALNACT2	1.13026	7.69048	10.4086	1.48e-17	7.77e-16	29.4442
PBLD	-1.34868	7.3235	-10.4009	1.54e-17	8.04e-16	29.4062
SOD2	1.36052	9.81872	10.399	1.56e-17	8.09e-16	29.3971
ROBO1	1.29641	8.0565	10.398	1.57e-17	8.12e-16	29.3919
MME	1.68404	7.18419	10.3969	1.57e-17	8.15e-16	29.3864
PRKCB	1.17729	8.0284	10.3924	1.61e-17	8.27e-16	29.3644
SLAMF1	1.23583	6.2935	10.3846	1.67e-17	8.54e-16	29.326
ALPL	1.66222	7.96658	10.3843	1.68e-17	8.54e-16	29.3242
TMEM236	-2.00847	8.05063	-10.3741	1.76e-17	8.94e-16	29.2739
IGKV5-2	1.81308	7.87457	10.3651	1.85e-17	9.31e-16	29.2298
ENTPD5	-1.52347	8.70501	-10.3627	1.87e-17	9.41e-16	29.2175
STOM	1.30352	9.72558	10.3595	1.9e-17	9.5e-16	29.2017
SAMD13	-1.035	6.32622	-10.3285	2.22e-17	1.09e-15	29.0488
TGM2	1.49515	10.3578	10.3253	2.25e-17	1.1e-15	29.033
CYSLTR1	1.27626	6.55265	10.314	2.38e-17	1.16e-15	28.9769
DAPP1	1.07405	7.66257	10.3015	2.54e-17	1.22e-15	28.9151
SYT11	1.00587	6.78836	10.285	2.75e-17	1.31e-15	28.8339
RBMS1P1	1.5513	7.03367	10.2641	3.06e-17	1.44e-15	28.7303
LCP2	1.47089	8.83646	10.2431	3.4e-17	1.58e-15	28.6266
RGS5	1.84281	8.71226	10.2414	3.43e-17	1.58e-15	28.6185
LOXL2	1.42262	8.50956	10.2379	3.49e-17	1.6e-15	28.6009
S100A9	2.10124	8.24967	10.2366	3.51e-17	1.61e-15	28.5944
C1S	1.57262	9.50781	10.2363	3.52e-17	1.61e-15	28.5928
ARHGAP44	-1.20892	7.71038	-10.2326	3.58e-17	1.63e-15	28.5748
SCNN1B	-1.89481	9.05892	-10.2125	3.96e-17	1.8e-15	28.4755
TDO2	2.32759	6.43538	10.2049	4.11e-17	1.87e-15	28.4378
BCAT1	1.04827	6.0737	10.1822	4.61e-17	2.07e-15	28.3254
HAVCR1	-1.48082	5.90197	-10.1555	5.27e-17	2.35e-15	28.1937
CCR2	1.12426	6.09483	10.1549	5.28e-17	2.35e-15	28.1906
SLAMF6	1.5158	7.24768	10.1543	5.3e-17	2.35e-15	28.1876
PDCD4	-1.06576	9.30645	-10.1508	5.39e-17	2.39e-15	28.1704
TNIP3	3.13635	8.5966	10.1499	5.42e-17	2.39e-15	28.1657
CR1	1.78633	6.71573	10.1461	5.52e-17	2.44e-15	28.1468
CYBB	1.43394	9.28903	10.1456	5.54e-17	2.44e-15	28.1447
FAM65B	1.53881	7.13819	10.1357	5.82e-17	2.54e-15	28.0954
PRLR	-1.54816	7.02698	-10.1266	6.09e-17	2.65e-15	28.0505
IL1R1	1.35863	8.56751	10.1228	6.21e-17	2.7e-15	28.0319
GUCA2B	-1.4861	9.06667	-10.1221	6.23e-17	2.7e-15	28.0282
IGLV7-46	2.4912	8.50463	10.1105	6.6e-17	2.83e-15	27.9708
SAMD9L	1.21801	9.81048	10.1095	6.63e-17	2.84e-15	27.966
FPR1	1.85359	6.95873	10.1065	6.74e-17	2.87e-15	27.9511
APBB1IP	1.18059	7.11378	10.0919	7.25e-17	3.08e-15	27.8791
ENG	1.24615	9.40005	10.0886	7.37e-17	3.12e-15	27.8624
PFKFB3	1.46008	9.33806	10.0807	7.66e-17	3.24e-15	27.8236
LAMP3	1.33377	7.76499	10.0772	7.8e-17	3.28e-15	27.8061
SERPINE1	2.0916	8.15335	10.0646	8.31e-17	3.47e-15	27.7439
PLEK	2.32549	7.87316	10.0637	8.35e-17	3.48e-15	27.7393
AKR1B1	1.39993	8.76734	10.0594	8.53e-17	3.55e-15	27.7181
LOC101930405	1.42328	7.00895	10.047	9.07e-17	3.75e-15	27.6571
LAPTM5	1.31903	10.2586	10.0339	9.69e-17	3.96e-15	27.592
PDE3A	-1.1322	8.81601	-10.0207	1.03e-16	4.21e-15	27.527
IGFBP5	1.87157	9.46653	10.0153	1.06e-16	4.32e-15	27.4999
KMO	1.23698	5.60495	10.0114	1.08e-16	4.4e-15	27.4807
ADH1A	-1.22729	7.01953	-9.96848	1.34e-16	5.39e-15	27.2684
SERPINA3	2.08068	8.24469	9.95921	1.41e-16	5.63e-15	27.2226
CA7	-1.97249	7.92004	-9.95302	1.45e-16	5.8e-15	27.1919
IL7R	1.80321	8.49793	9.95174	1.46e-16	5.83e-15	27.1856
DSE	1.14854	7.53535	9.9145	1.76e-16	6.92e-15	27.0013
CSF3R	1.97015	7.38439	9.90067	1.89e-16	7.39e-15	26.9329
IHH	-1.00956	8.28825	-9.88391	2.05e-16	7.98e-15	26.85
TMEM156	1.42913	6.07652	9.88318	2.06e-16	7.99e-15	26.8463
RAB30	1.09505	7.30959	9.87911	2.1e-16	8.11e-15	26.8262
SEMA6A	-1.21243	8.76324	-9.8757	2.14e-16	8.23e-15	26.8094
SELL	2.08763	7.88254	9.87161	2.19e-16	8.38e-15	26.7891
TSPAN7	-1.16139	9.70775	-9.87097	2.19e-16	8.39e-15	26.786
SLFN5	1.02613	8.86704	9.86279	2.28e-16	8.7e-15	26.7455
CCR1	1.47357	6.67855	9.85874	2.33e-16	8.87e-15	26.7254
SULT1A2	-1.27989	7.75214	-9.83634	2.61e-16	9.79e-15	26.6146
FCER1G	1.57078	7.79935	9.82742	2.73e-16	1.02e-14	26.5704
ELTD1	1.83778	7.48028	9.8233	2.78e-16	1.04e-14	26.5501
PXDN	1.48981	8.70827	9.82147	2.81e-16	1.05e-14	26.541
BEST4	-1.77921	7.91319	-9.81894	2.85e-16	1.06e-14	26.5285
GLRA2	-1.75242	5.60863	-9.81407	2.92e-16	1.08e-14	26.5044
CEMIP	2.26378	7.92716	9.79791	3.16e-16	1.17e-14	26.4244
SLC39A5	-1.52366	8.99417	-9.78873	3.31e-16	1.21e-14	26.379
COL4A1	1.44215	8.40158	9.7872	3.34e-16	1.22e-14	26.3714
IL13RA2	2.15501	5.75636	9.77889	3.48e-16	1.27e-14	26.3303
LUM	1.6113	9.58734	9.77453	3.55e-16	1.29e-14	26.3087
CXCL9	2.07507	7.16496	9.76347	3.76e-16	1.35e-14	26.254
MNDA	1.70303	5.98919	9.75304	3.96e-16	1.42e-14	26.2024
CTSL	1.11754	8.64351	9.7488	4.04e-16	1.44e-14	26.1814
SOCS3	1.70338	8.80095	9.73911	4.24e-16	1.5e-14	26.1335
CXCR2	1.89587	6.19302	9.7391	4.25e-16	1.5e-14	26.1334
PTGDR	-1.12488	7.61726	-9.73785	4.27e-16	1.51e-14	26.1272
EMP3	1.05367	8.54795	9.73386	4.36e-16	1.53e-14	26.1075
ADAMTS9	1.29504	8.08533	9.72362	4.59e-16	1.61e-14	26.0568
BCL2A1	1.67672	7.06676	9.70971	4.92e-16	1.72e-14	25.988
ANXA6	1.09348	9.72332	9.70828	4.95e-16	1.73e-14	25.9809
IGKV2OR22-4	1.30568	6.11163	9.70741	4.98e-16	1.74e-14	25.9766
RNU6-570P	-1.11584	5.34688	-9.68197	5.65e-16	1.96e-14	25.8507
CD93	1.35726	8.40789	9.67997	5.71e-16	1.97e-14	25.8408
ANGPT2	1.33961	6.48611	9.67272	5.92e-16	2.04e-14	25.805
LILRA1	1.15546	6.84811	9.66706	6.09e-16	2.09e-14	25.7769
TAGAP	1.62009	7.2012	9.66183	6.25e-16	2.14e-14	25.7511
LILRB3	1.37819	7.55719	9.65671	6.42e-16	2.18e-14	25.7257
CD55	1.29826	11.1114	9.65445	6.49e-16	2.2e-14	25.7146
CECR1	1.17395	7.9363	9.65232	6.56e-16	2.22e-14	25.704
STC1	2.05006	7.03011	9.6473	6.73e-16	2.27e-14	25.6792
CNTN3	-1.20637	5.63923	-9.64393	6.84e-16	2.3e-14	25.6625
VCAM1	1.43834	7.69642	9.63633	7.11e-16	2.38e-14	25.6249
COL6A3	1.74373	9.25196	9.61604	7.87e-16	2.6e-14	25.5245
IGFBP7	1.1297	10.3435	9.6107	8.08e-16	2.67e-14	25.4981
THY1	1.44532	8.16041	9.60913	8.14e-16	2.68e-14	25.4903
PRRX1	1.62211	7.46478	9.6045	8.33e-16	2.74e-14	25.4675
SLC7A7	1.09813	7.14959	9.6	8.52e-16	2.8e-14	25.4452
RASSF2	1.40533	7.84249	9.59694	8.66e-16	2.84e-14	25.43
ITGA4	1.0571	7.45086	9.59158	8.89e-16	2.91e-14	25.4035
BDH1	-1.06718	8.07065	-9.58723	9.09e-16	2.97e-14	25.382
ANGPTL2	1.44775	8.36149	9.5848	9.2e-16	2.99e-14	25.37
ARHGEF6	1.00405	7.15739	9.58466	9.21e-16	2.99e-14	25.3693
CXCL13	2.26422	7.28083	9.58145	9.36e-16	3.04e-14	25.3534
ANKRD44	1.07909	7.63318	9.57954	9.45e-16	3.05e-14	25.344
SELENBP1	-1.41765	10.5885	-9.57272	9.77e-16	3.14e-14	25.3102
DOCK11	1.11093	7.73509	9.57	9.91e-16	3.18e-14	25.2968
CXCL2	1.59134	7.99285	9.55937	1.04e-15	3.33e-14	25.2442
C2	1.09214	8.28179	9.54656	1.11e-15	3.53e-14	25.1808
PLCE1	-1.17468	9.0755	-9.52538	1.24e-15	3.89e-14	25.0761
EMR3	1.25732	6.24936	9.51656	1.3e-15	4.05e-14	25.0324
CFB	1.40797	10.0087	9.51079	1.33e-15	4.16e-14	25.0039
SLC6A19	-1.42483	6.85277	-9.48918	1.49e-15	4.57e-14	24.897
PLA1A	1.01819	6.79703	9.48806	1.49e-15	4.58e-14	24.8915
MEDAG	1.41928	6.81716	9.48111	1.55e-15	4.73e-14	24.8571
ABCG2	-1.84737	6.34109	-9.48031	1.55e-15	4.74e-14	24.8531
RBMS1	1.02638	7.79777	9.47481	1.6e-15	4.85e-14	24.8259
BCL6	1.326	7.70622	9.46884	1.64e-15	4.97e-14	24.7964
TREM1	2.0611	6.94597	9.45439	1.77e-15	5.31e-14	24.7249
LAMC1	1.1182	8.60178	9.43284	1.97e-15	5.83e-14	24.6184
PHLPP2	-1.1475	8.20383	-9.43079	1.99e-15	5.87e-14	24.6083
TM4SF1	1.35936	10.5981	9.4221	2.08e-15	6.12e-14	24.5653
IL1B	2.51715	8.99407	9.4204	2.1e-15	6.16e-14	24.5569
RPS6KA6	-1.12016	6.4338	-9.41909	2.11e-15	6.19e-14	24.5504
SLC17A4	-1.68076	7.08903	-9.41519	2.15e-15	6.3e-14	24.5311
CA1	-2.78742	8.84874	-9.40413	2.27e-15	6.65e-14	24.4764
MEF2C	1.30516	8.48718	9.40323	2.29e-15	6.67e-14	24.472
CDH11	1.16599	8.50223	9.39685	2.36e-15	6.86e-14	24.4405
IGSF6	1.56019	8.63417	9.39482	2.38e-15	6.9e-14	24.4304
VIM	1.07742	10.2183	9.39173	2.42e-15	7e-14	24.4151
ARHGAP15	1.19408	6.9499	9.37784	2.59e-15	7.48e-14	24.3465
MXRA5	1.54931	9.23786	9.37546	2.63e-15	7.56e-14	24.3347
TFPI	1.32865	6.81254	9.37387	2.65e-15	7.61e-14	24.3268
SRPX2	1.16312	7.40878	9.3674	2.73e-15	7.81e-14	24.2949
AIM2	1.34468	6.19598	9.36602	2.75e-15	7.85e-14	24.288
SNX10	1.04667	7.27966	9.36514	2.77e-15	7.87e-14	24.2837
SLC4A4	-1.7009	9.76771	-9.36512	2.77e-15	7.87e-14	24.2836
FCGR1A	1.66146	6.29054	9.36421	2.78e-15	7.9e-14	24.2791
MYO1F	1.05821	7.84339	9.3573	2.88e-15	8.16e-14	24.245
IL1A	2.0226	6.72836	9.35242	2.95e-15	8.32e-14	24.2208
TLR8	1.18759	6.1892	9.346	3.04e-15	8.56e-14	24.1891
DOC2B	1.00359	7.80839	9.33377	3.24e-15	9.06e-14	24.1286
WNT5A	1.79096	7.37758	9.32044	3.46e-15	9.62e-14	24.0628
CHI3L2	1.64098	6.22333	9.30629	3.71e-15	1.03e-13	23.9928
COL12A1	2.00296	8.44945	9.30363	3.76e-15	1.04e-13	23.9797
SLC9A2	-1.47873	8.89731	-9.29739	3.88e-15	1.07e-13	23.9488
CORO1A	1.23996	9.15707	9.29616	3.91e-15	1.08e-13	23.9428
PKDCC	-1.04474	8.0784	-9.28149	4.2e-15	1.15e-13	23.8703
ITGA5	1.51748	9.07927	9.26046	4.67e-15	1.26e-13	23.7664
NHSL1	-1.0557	8.81331	-9.25593	4.78e-15	1.29e-13	23.744
CHN1	1.38551	6.68552	9.24993	4.92e-15	1.32e-13	23.7144
LRRK2	1.54924	6.04499	9.24288	5.1e-15	1.35e-13	23.6795
TMEM154	1.19635	7.59766	9.2426	5.11e-15	1.36e-13	23.6781
PTP4A3	1.19385	8.47843	9.23866	5.21e-15	1.38e-13	23.6587
SLC2A3	1.64058	8.25592	9.23024	5.43e-15	1.43e-13	23.6171
GJA1	1.4735	7.77171	9.2228	5.64e-15	1.49e-13	23.5804
TMEM163	1.04122	6.52092	9.20961	6.02e-15	1.58e-13	23.5152
IGHV5-78	1.02124	7.80207	9.19122	6.61e-15	1.72e-13	23.4244
HEG1	1.16738	8.14823	9.18722	6.74e-15	1.76e-13	23.4047
ATP2C2	-1.119	8.83101	-9.16764	7.43e-15	1.92e-13	23.308
GPX7	1.01399	8.24916	9.16364	7.58e-15	1.96e-13	23.2882
IL33	1.25174	6.35147	9.15891	7.76e-15	2e-13	23.2649
ENPP2	1.15158	8.91816	9.14811	8.2e-15	2.1e-13	23.2116
LILRA3	1.56519	7.02409	9.14388	8.37e-15	2.14e-13	23.1907
PARP9	1.07701	8.30248	9.14005	8.53e-15	2.17e-13	23.1718
LOX	1.33315	7.37893	9.12474	9.21e-15	2.33e-13	23.0962
FLT1	1.22123	7.37648	9.122	9.34e-15	2.36e-13	23.0827
GBP1	1.21206	10.3829	9.11561	9.64e-15	2.43e-13	23.0512
SLAMF8	1.04898	7.63341	9.11309	9.76e-15	2.45e-13	23.0387
MGP	1.72409	7.56468	9.11275	9.78e-15	2.45e-13	23.037
CCDC3	1.35823	7.88789	9.1069	1.01e-14	2.52e-13	23.0082
LRRC31	-1.28691	6.76635	-9.08935	1.1e-14	2.73e-13	22.9215
INHBA	1.91748	7.34176	9.07591	1.18e-14	2.91e-13	22.8553
SLC13A2	-1.74884	7.39853	-9.06081	1.27e-14	3.12e-13	22.7808
CXCL11	2.10319	7.25654	9.05028	1.34e-14	3.27e-13	22.7288
PIGZ	-1.38674	7.98456	-9.04708	1.36e-14	3.32e-13	22.7131
FBN1	1.51532	7.80181	9.02721	1.5e-14	3.63e-13	22.6151
KDR	1.33511	7.91685	9.02658	1.51e-14	3.64e-13	22.6119
CKB	-1.88389	10.2917	-9.01939	1.56e-14	3.75e-13	22.5765
CCL2	1.82053	9.17066	9.00992	1.64e-14	3.92e-13	22.5298
PAQR5	-1.02145	7.4704	-9.00071	1.71e-14	4.09e-13	22.4844
VCAN	1.56518	8.47582	8.99802	1.74e-14	4.14e-13	22.4711
FAM126A	1.13376	6.27525	8.99762	1.74e-14	4.15e-13	22.4691
PTGS2	2.37727	8.34278	8.99378	1.77e-14	4.21e-13	22.4502
HLA-DOB	1.16401	6.84991	8.97673	1.93e-14	4.55e-13	22.3662
SERPING1	1.2891	9.13758	8.96928	2e-14	4.71e-13	22.3295
BNIP3	1.19606	8.06025	8.96734	2.02e-14	4.75e-13	22.3199
CA2	-1.42473	10.208	-8.96034	2.1e-14	4.91e-13	22.2854
CALCRL	1.57508	7.37295	8.95779	2.12e-14	4.97e-13	22.2728
C4B	1.40007	8.22057	8.93823	2.34e-14	5.43e-13	22.1765
SLC30A10	-1.71809	7.26384	-8.90335	2.79e-14	6.36e-13	22.0046
CSGALNACT1	1.0982	6.23304	8.8996	2.84e-14	6.45e-13	21.9862
DYSF	1.36303	7.11393	8.88702	3.02e-14	6.81e-13	21.9242
WISP1	1.07012	7.42933	8.87697	3.18e-14	7.13e-13	21.8747
GPR132	1.02584	6.96793	8.87163	3.26e-14	7.28e-13	21.8485
SATB2	-1.34737	10.2775	-8.86594	3.36e-14	7.48e-13	21.8204
KLK1	-1.03561	8.69487	-8.85842	3.49e-14	7.74e-13	21.7834
STRIP2	1.32186	6.82222	8.83839	3.85e-14	8.47e-13	21.6848
FGF2	1.00712	7.88073	8.83465	3.93e-14	8.61e-13	21.6664
ICOS	1.10931	5.98796	8.83108	4e-14	8.74e-13	21.6489
CDH3	1.72807	8.63448	8.83015	4.01e-14	8.77e-13	21.6443
HSD11B2	-1.5561	9.676	-8.82537	4.11e-14	8.95e-13	21.6207
MIR223	1.49497	6.41166	8.82018	4.22e-14	9.17e-13	21.5952
CLDN1	1.63287	8.00172	8.81839	4.26e-14	9.24e-13	21.5864
UBD	1.45582	7.47767	8.80625	4.52e-14	9.76e-13	21.5267
GALNT12	-1.23042	9.18159	-8.79345	4.82e-14	1.03e-12	21.4637
GPR65	1.08863	6.17617	8.77314	5.33e-14	1.13e-12	21.3638
GBP2	1.02206	8.23234	8.75336	5.89e-14	1.24e-12	21.2666
MCTP1	1.24528	7.19674	8.74323	6.19e-14	1.29e-12	21.2168
OLFML2B	1.10617	6.66658	8.73354	6.5e-14	1.35e-12	21.1691
NPY4R	-1.45272	6.186	-8.72848	6.66e-14	1.38e-12	21.1443
CES2	-1.06013	10.0258	-8.7146	7.14e-14	1.47e-12	21.0761
C5AR1	1.15242	7.58774	8.71453	7.14e-14	1.47e-12	21.0757
CDH5	1.12755	8.45285	8.69522	7.87e-14	1.6e-12	20.9809
LILRA5	1.39846	6.41821	8.69427	7.9e-14	1.6e-12	20.9762
EDNRA	1.61573	7.46105	8.69239	7.98e-14	1.61e-12	20.9669
EDN3	-1.04824	8.42393	-8.66305	9.23e-14	1.85e-12	20.8229
EVI2A	1.07031	6.28135	8.66209	9.28e-14	1.86e-12	20.8181
FPR2	1.89199	6.14183	8.65892	9.43e-14	1.89e-12	20.8026
FMO5	-1.41192	8.00774	-8.65507	9.61e-14	1.92e-12	20.7837
RETNLB	-2.10981	8.09023	-8.64465	1.01e-13	2.01e-12	20.7325
ABCA12	2.33774	7.82846	8.64456	1.01e-13	2.01e-12	20.7321
P2RY13	1.38895	6.46664	8.64325	1.02e-13	2.02e-12	20.7257
VWF	1.33465	8.04419	8.63242	1.08e-13	2.12e-12	20.6725
CFH	1.50321	8.23503	8.60712	1.22e-13	2.39e-12	20.5483
TCF4	1.16085	8.92232	8.60317	1.24e-13	2.43e-12	20.529
TNFAIP6	2.46354	6.73788	8.60028	1.26e-13	2.46e-12	20.5148
FCN3	1.17866	7.32948	8.59945	1.27e-13	2.47e-12	20.5107
CHST5	-1.25221	9.37884	-8.59641	1.29e-13	2.51e-12	20.4958
BST2	1.00034	7.27751	8.578	1.41e-13	2.73e-12	20.4055
TLR1	1.1865	6.06405	8.56903	1.47e-13	2.84e-12	20.3616
TRPS1	1.06116	6.91069	8.56666	1.49e-13	2.87e-12	20.3499
CLEC4A	1.07039	5.90035	8.55087	1.61e-13	3.08e-12	20.2725
DUOXA2	2.74994	10.1592	8.54465	1.66e-13	3.17e-12	20.242
ZG16	-2.34128	9.61004	-8.54228	1.68e-13	3.2e-12	20.2304
VSIG2	-1.03472	9.57206	-8.53758	1.72e-13	3.27e-12	20.2074
HCK	1.088	8.26067	8.53555	1.74e-13	3.3e-12	20.1974
MCAM	1.1562	8.24539	8.50031	2.07e-13	3.88e-12	20.0248
PSAT1	1.10346	6.96249	8.49387	2.14e-13	3.99e-12	19.9932
ACKR4	1.08817	6.48988	8.49042	2.18e-13	4.04e-12	19.9763
S100A12	2.54327	6.73749	8.48139	2.28e-13	4.21e-12	19.9321
PNLIPRP2	-1.17651	5.72572	-8.47879	2.31e-13	4.26e-12	19.9194
IL1RN	1.57084	8.21736	8.4782	2.32e-13	4.26e-12	19.9165
CLDN8	-2.94805	5.94115	-8.46466	2.48e-13	4.54e-12	19.8502
HEPACAM2	-2.28832	8.14335	-8.46422	2.48e-13	4.55e-12	19.8481
TMTC1	1.04073	6.88205	8.45517	2.6e-13	4.75e-12	19.8038
PAPPA	1.05808	6.6673	8.43907	2.81e-13	5.1e-12	19.725
NRG1	1.29135	7.70204	8.43362	2.89e-13	5.22e-12	19.6984
GK3P	1.00842	8.59864	8.40954	3.26e-13	5.82e-12	19.5806
PLXNC1	1.06025	8.10141	8.39368	3.52e-13	6.27e-12	19.5031
DDIT4	1.05976	8.03847	8.37539	3.86e-13	6.84e-12	19.4137
KCNJ15	1.55369	6.47841	8.36797	4e-13	7.08e-12	19.3774
IGJ	1.23897	12.17	8.35759	4.21e-13	7.42e-12	19.3267
G0S2	1.49994	8.88564	8.35667	4.23e-13	7.44e-12	19.3222
COL4A2	1.09215	8.5705	8.33323	4.75e-13	8.28e-12	19.2077
EFCAB4B	-1.01556	7.97691	-8.32447	4.96e-13	8.63e-12	19.165
MOGAT2	-1.36434	8.1355	-8.31534	5.19e-13	8.99e-12	19.1204
MT1M	-1.68689	8.40933	-8.26146	6.78e-13	1.15e-11	18.8575
NABP1	1.0518	8.75815	8.24191	7.47e-13	1.25e-11	18.7623
PDGFRB	1.238	8.13431	8.226	8.08e-13	1.34e-11	18.6847
SCIMP	1.16964	7.33758	8.19965	9.21e-13	1.52e-11	18.5564
SERPINB3	3.4788	7.07403	8.18943	9.68e-13	1.59e-11	18.5066
ALOX5AP	1.10628	7.83419	8.15211	1.16e-12	1.87e-11	18.325
MT1H	-1.11404	8.39556	-8.1421	1.22e-12	1.96e-11	18.2763
SLC6A14	2.34428	10.4031	8.13502	1.27e-12	2.02e-11	18.2419
TM4SF18	1.0433	7.02329	8.11097	1.43e-12	2.26e-11	18.125
CYP7B1	1.07095	7.49902	8.08691	1.61e-12	2.52e-11	18.0082
PCOLCE	1.12867	9.06894	8.08401	1.63e-12	2.55e-11	17.9941
SPP1	2.11199	7.74241	8.08061	1.66e-12	2.59e-11	17.9776
COL15A1	1.23255	8.29707	8.05681	1.86e-12	2.89e-11	17.862
FAP	1.66337	5.71932	8.05025	1.92e-12	2.98e-11	17.8302
TCEA3	-1.11525	8.82058	-8.0491	1.94e-12	2.99e-11	17.8246
CCL18	1.99968	8.68127	8.04756	1.95e-12	3.01e-11	17.8171
PROK2	1.62018	7.97228	8.02855	2.14e-12	3.27e-11	17.7249
DENND5A	1.04074	7.8979	8.02077	2.23e-12	3.38e-11	17.6872
TMEM71	1.15824	6.16377	8.00707	2.38e-12	3.6e-11	17.6208
CD69	1.21724	7.01659	7.98099	2.71e-12	4.06e-11	17.4944
MEP1AP4	-1.05895	6.80321	-7.95047	3.14e-12	4.66e-11	17.3467
BICC1	1.17117	6.55032	7.94772	3.19e-12	4.71e-11	17.3333
FKBP10	1.02518	8.12075	7.94573	3.22e-12	4.75e-11	17.3237
FADS2	1.39955	8.68936	7.93935	3.32e-12	4.89e-11	17.2928
SPARC	1.17889	10.8767	7.92701	3.53e-12	5.16e-11	17.2331
MIR142	1.39281	5.97101	7.89902	4.05e-12	5.85e-11	17.0978
GPR116	1.2396	7.19727	7.89583	4.11e-12	5.93e-11	17.0824
LPHN2	1.20568	8.13695	7.86577	4.77e-12	6.78e-11	16.9372
FIBIN	1.00909	6.02251	7.85624	5e-12	7.08e-11	16.8912
MGAM	1.70929	6.58216	7.8354	5.53e-12	7.77e-11	16.7906
GPR97	1.13086	7.03287	7.81511	6.11e-12	8.52e-11	16.6927
P2RY10	1.18053	6.48484	7.81219	6.2e-12	8.63e-11	16.6787
CXCL6	1.31507	6.62457	7.81092	6.24e-12	8.67e-11	16.6725
MMP2	1.5349	9.54374	7.80325	6.48e-12	8.98e-11	16.6356
C3	1.5255	9.90679	7.802	6.52e-12	9.03e-11	16.6295
B3GNT7	-1.48061	9.44076	-7.79875	6.62e-12	9.17e-11	16.6139
IL6	2.26517	6.58362	7.7883	6.97e-12	9.64e-11	16.5635
MYO1A	-1.16141	9.27593	-7.78033	7.25e-12	1e-10	16.5251
RHOJ	1.1024	8.00528	7.77853	7.31e-12	1.01e-10	16.5164
KLK10	1.86224	8.73006	7.75448	8.22e-12	1.12e-10	16.4007
SLC11A1	1.30373	6.79266	7.7495	8.43e-12	1.15e-10	16.3767
LHFP	1.16664	9.13912	7.74862	8.46e-12	1.15e-10	16.3725
MIR192	-1.12722	7.80247	-7.74828	8.48e-12	1.16e-10	16.3708
PI3	1.48003	10.2968	7.73438	9.07e-12	1.23e-10	16.3039
CD37	1.17555	8.36863	7.72732	9.39e-12	1.27e-10	16.27
REP15	-1.51183	7.0072	-7.72352	9.57e-12	1.29e-10	16.2517
STAP1	1.44321	5.66026	7.70724	1.04e-11	1.39e-10	16.1734
CCL4L2	1.63226	7.29324	7.69646	1.09e-11	1.46e-10	16.1216
CLEC6A	1.13097	5.30277	7.68437	1.16e-11	1.54e-10	16.0636
SLC16A9	-1.39964	6.96602	-7.67976	1.18e-11	1.57e-10	16.0414
TMEM56	-1.03827	8.07337	-7.67215	1.23e-11	1.62e-10	16.0049
FGF7P2	1.09897	6.17507	7.66997	1.24e-11	1.64e-10	15.9944
C3AR1	1.24735	7.51428	7.66062	1.3e-11	1.71e-10	15.9496
CYYR1	1.07592	7.67435	7.65621	1.33e-11	1.74e-10	15.9284
LRMP	1.07138	7.36201	7.64505	1.4e-11	1.84e-10	15.8748
ANGPTL4	1.18267	7.66799	7.64089	1.43e-11	1.87e-10	15.8549
ITGA2	1.14574	9.95717	7.63178	1.5e-11	1.94e-10	15.8112
BIRC3	1.46444	8.94172	7.61244	1.65e-11	2.12e-10	15.7185
GLT1D1	1.34148	6.31868	7.60322	1.72e-11	2.21e-10	15.6743
CYP2B7P	-1.06112	5.7709	-7.60279	1.72e-11	2.21e-10	15.6723
GFPT2	1.30372	6.57623	7.57914	1.93e-11	2.46e-10	15.559
FPR3	1.1155	7.36199	7.57314	1.99e-11	2.53e-10	15.5303
SERPINB7	2.4125	6.64044	7.52187	2.56e-11	3.18e-10	15.2852
LGALS2	-1.1878	7.50878	-7.51608	2.63e-11	3.26e-10	15.2575
TFCP2L1	-1.06385	9.74157	-7.50143	2.82e-11	3.48e-10	15.1876
SLC16A6	1.0381	6.53219	7.47291	3.24e-11	3.95e-10	15.0515
NXPE2	-1.13395	7.0698	-7.45243	3.58e-11	4.33e-10	14.9539
NR3C2	-1.06198	8.81829	-7.44147	3.78e-11	4.54e-10	14.9017
SERPINF1	1.12907	8.05678	7.43669	3.86e-11	4.64e-10	14.8789
SNORA71B	-1.03029	10.1761	-7.43231	3.95e-11	4.73e-10	14.8581
SERPINB4	2.57169	6.57542	7.42276	4.13e-11	4.95e-10	14.8126
GZMK	1.36446	6.5201	7.41785	4.23e-11	5.05e-10	14.7892
F2RL2	1.1422	6.93936	7.41434	4.31e-11	5.12e-10	14.7725
APOL1	1.33554	8.91418	7.40809	4.44e-11	5.27e-10	14.7428
NXPE4	-1.80635	9.8419	-7.40711	4.46e-11	5.29e-10	14.7381
CCL3	1.11519	7.28243	7.40266	4.56e-11	5.4e-10	14.717
COL1A2	1.2713	9.67456	7.39896	4.64e-11	5.47e-10	14.6993
CFI	1.46968	6.87956	7.3815	5.05e-11	5.91e-10	14.6163
CD48	1.06387	8.09194	7.38143	5.05e-11	5.91e-10	14.616
COL5A2	1.05918	7.20766	7.38071	5.07e-11	5.93e-10	14.6126
SLC51B	-1.0238	8.32008	-7.3507	5.86e-11	6.8e-10	14.4701
SLC16A4	1.04352	6.6203	7.31686	6.9e-11	7.91e-10	14.3096
NID1	1.1124	8.15403	7.31665	6.9e-11	7.91e-10	14.3085
NEDD4L	-1.054	9.64509	-7.29779	7.56e-11	8.59e-10	14.2192
MT1F	-1.15722	10.6599	-7.28393	8.08e-11	9.14e-10	14.1535
DCN	1.39413	8.56802	7.2643	8.88e-11	9.95e-10	14.0607
BANK1	1.55392	6.86579	7.2488	9.57e-11	1.07e-09	13.9873
SLC10A5	-1.23118	7.43382	-7.22314	1.08e-10	1.19e-09	13.8661
CXCR4	1.09928	7.58584	7.22224	1.09e-10	1.2e-09	13.8618
B3GALT5	-1.20201	8.40033	-7.20948	1.16e-10	1.27e-09	13.8016
MT1G	-1.10684	11.0974	-7.20817	1.16e-10	1.28e-09	13.7954
GLT8D2	1.07884	7.27093	7.20456	1.18e-10	1.3e-09	13.7784
ACSL1	1.40022	8.35533	7.20129	1.2e-10	1.32e-09	13.763
ARHGAP29	1.0283	6.15903	7.18338	1.31e-10	1.42e-09	13.6785
AKT3	1.01209	7.11251	7.15609	1.49e-10	1.6e-09	13.5499
RGS1	1.28461	6.40914	7.11335	1.83e-10	1.94e-09	13.3488
DSG3	1.98661	7.48818	7.10638	1.9e-10	1.99e-09	13.3161
CAPN9	-1.03871	7.11482	-7.09099	2.04e-10	2.14e-09	13.2437
B4GALNT2	-1.09368	6.84677	-7.0821	2.13e-10	2.22e-09	13.202
CES3	-1.06439	8.7116	-7.06686	2.29e-10	2.37e-09	13.1305
CCL4	1.24661	5.22711	7.04376	2.56e-10	2.63e-09	13.0222
FFAR2	1.48712	6.7727	7.02156	2.84e-10	2.89e-09	12.9183
NOS2	1.89677	10.4387	7.01084	2.99e-10	3.03e-09	12.8681
TLR2	1.00279	6.3606	6.9971	3.2e-10	3.22e-09	12.8038
DUOX2	2.44248	11.4997	6.97	3.64e-10	3.64e-09	12.6772
C4BPB	1.34638	6.85029	6.96144	3.79e-10	3.78e-09	12.6372
CXCL5	1.4649	7.85496	6.95054	3.99e-10	3.97e-09	12.5864
GUCY1A3	1.19504	7.01203	6.90248	5.01e-10	4.9e-09	12.3624
SAA2-SAA4	1.08843	5.99318	6.88606	5.42e-10	5.28e-09	12.286
HCAR3	2.09448	7.11636	6.87912	5.6e-10	5.43e-09	12.2538
FDCSP	1.8361	6.97255	6.85437	6.29e-10	6.07e-09	12.1388
TNFRSF11B	1.30766	7.53815	6.83427	6.92e-10	6.64e-09	12.0455
LRRC19	-1.38058	7.96861	-6.83089	7.03e-10	6.72e-09	12.0299
IL18RAP	1.16952	5.91356	6.82135	7.36e-10	7.01e-09	11.9856
SERPINB5	1.82875	8.84193	6.79597	8.3e-10	7.85e-09	11.868
COL1A1	1.18577	10.0137	6.78811	8.61e-10	8.11e-09	11.8317
SAA2	1.1599	6.70815	6.74608	1.05e-09	9.75e-09	11.6374
RGS2	1.10223	8.39545	6.74586	1.05e-09	9.76e-09	11.6364
SAA1	1.30434	6.50225	6.73619	1.1e-09	1.02e-08	11.5918
LCN2	1.6406	11.3389	6.73531	1.1e-09	1.02e-08	11.5877
REG1A	3.039	9.32287	6.70187	1.29e-09	1.18e-08	11.4335
CLEC4E	1.19009	4.91426	6.69811	1.32e-09	1.2e-08	11.4162
SPARCL1	1.2142	9.11356	6.69161	1.36e-09	1.23e-08	11.3863
MEP1A	-1.53215	9.88641	-6.69003	1.37e-09	1.24e-08	11.379
LOC728715	1.02279	5.6425	6.68991	1.37e-09	1.24e-08	11.3785
NTRK2	-1.02164	6.06265	-6.67688	1.45e-09	1.31e-08	11.3185
B3GALT1	-1.46923	8.10622	-6.66617	1.53e-09	1.37e-08	11.2693
HOXB13	-1.22353	8.70036	-6.62935	1.82e-09	1.62e-08	11.1002
THBS2	1.27716	7.59818	6.60188	2.07e-09	1.82e-08	10.9743
NRCAM	1.00556	5.34979	6.5767	2.32e-09	2.03e-08	10.8591
SCIN	-1.06029	7.37788	-6.57554	2.34e-09	2.04e-08	10.8538
CD163	1.02755	6.52511	6.56463	2.46e-09	2.13e-08	10.8039
CYP2B6	-1.25306	6.58546	-6.56179	2.49e-09	2.16e-08	10.7909
OSM	1.47046	7.0875	6.53278	2.85e-09	2.45e-08	10.6585
APOBEC3A	1.21847	7.6267	6.52185	3e-09	2.56e-08	10.6086
PARP15	1.07325	6.33129	6.5144	3.11e-09	2.64e-08	10.5747
KRT6B	1.07902	7.41019	6.50124	3.3e-09	2.79e-08	10.5148
ME1	1.1297	9.27566	6.49552	3.39e-09	2.86e-08	10.4887
IL24	1.57867	6.347	6.37808	5.84e-09	4.71e-08	9.95616
TLR10	1.1105	6.05767	6.33124	7.25e-09	5.76e-08	9.74485
ATOH1	-1.30175	9.80014	-6.23805	1.11e-08	8.57e-08	9.32644
GPR126	1.20176	9.06529	6.17341	1.5e-08	1.12e-07	9.03774
MS4A1	1.77169	8.33689	6.17277	1.5e-08	1.12e-07	9.03491
GPNMB	1.01176	8.56958	6.1359	1.77e-08	1.31e-07	8.87082
CFTR	-1.03596	9.38282	-6.11214	1.98e-08	1.45e-07	8.76532
GHR	-1.12144	6.05918	-6.08431	2.24e-08	1.63e-07	8.64201
COL3A1	1.07216	9.86829	6.06402	2.46e-08	1.78e-07	8.55222
FCRL3	1.02077	6.56866	6.03152	2.85e-08	2.03e-07	8.40874
PI15	2.21406	7.3335	6.02688	2.91e-08	2.07e-07	8.38829
MS4A8	-1.00568	7.09299	-5.99519	3.35e-08	2.36e-07	8.24874
DEFB4B	1.2461	6.22708	5.97606	3.66e-08	2.56e-07	8.16468
DKK1	1.33656	6.01689	5.96774	3.8e-08	2.65e-07	8.12815
FABP1	-1.17321	9.66277	-5.96519	3.84e-08	2.67e-07	8.11699
NXPE1	-1.43912	10.283	-5.9553	4.01e-08	2.79e-07	8.07359
HCAR2	1.55742	7.20573	5.91754	4.76e-08	3.25e-07	7.90832
KLK6	1.60696	6.79995	5.90879	4.95e-08	3.37e-07	7.87009
C9orf152	-1.04723	8.47501	-5.84745	6.51e-08	4.33e-07	7.60278
BTNL8	-1.01721	8.63155	-5.80716	7.78e-08	5.1e-07	7.428
SLC26A3	-1.60611	11.6758	-5.79094	8.36e-08	5.44e-07	7.35777
AZGP1	1.08909	7.8166	5.72453	1.12e-07	7.13e-07	7.0713
FER1L6	-1.03304	7.91208	-5.7229	1.13e-07	7.18e-07	7.0643
C4BPA	1.71773	7.35977	5.71073	1.19e-07	7.54e-07	7.01198
MMRN1	1.09647	7.20693	5.70855	1.2e-07	7.6e-07	7.00262
TFPI2	1.3036	5.74011	5.68091	1.36e-07	8.51e-07	6.88403
VNN1	1.65812	8.87074	5.65964	1.49e-07	9.27e-07	6.79298
GPR110	1.3859	7.03116	5.63559	1.66e-07	1.02e-06	6.69021
CD177	-1.56819	10.4504	-5.61328	1.83e-07	1.12e-06	6.59512
REG1B	2.74391	7.60904	5.49422	3.08e-07	1.79e-06	6.0908
CLCA1	-2.33988	10.0893	-5.48739	3.17e-07	1.84e-06	6.06204
GALNT8	-1.00132	7.89609	-5.28953	7.41e-07	4.01e-06	5.23731
CD22	1.25055	7.65923	5.24798	8.84e-07	4.69e-06	5.06623
CR2	1.6295	6.71164	5.20438	1.06e-06	5.53e-06	4.8875
NMUR2	1.57772	6.81632	5.17426	1.21e-06	6.19e-06	4.76455
SLC26A4	1.04906	5.45286	5.16753	1.24e-06	6.35e-06	4.73711
SLCO1B3	1.69799	6.1809	5.14998	1.34e-06	6.79e-06	4.66571
MS4A12	-1.76677	10.0865	-5.12639	1.48e-06	7.44e-06	4.56997
CYR61	1.04328	7.63646	5.09561	1.68e-06	8.33e-06	4.4454
UGT2B11	-1.05312	8.66029	-5.09529	1.68e-06	8.34e-06	4.44409
GLDN	-1.22742	7.12151	-4.90478	3.69e-06	1.7e-05	3.68295
TCL1A	1.01134	6.78137	4.7302	7.49e-06	3.23e-05	3.00097
FCGBP	-1.08631	11.5069	-4.65336	1.02e-05	4.27e-05	2.70568
GCG	-1.20881	8.59569	-4.465	2.13e-05	8.32e-05	1.99504
REG4	1.06343	10.3145	4.3213	3.71e-05	0.000136841	1.46601
ALDOB	1.42084	9.09615	4.28061	4.33e-05	0.000157278	1.31832
TM4SF20	1.45185	6.94117	4.24555	4.94e-05	0.000177192	1.19184
CCL19	1.02533	8.33496	4.21386	5.57e-05	0.000196993	1.07813
ITLN1	-1.59459	10.0822	-4.19169	6.05e-05	0.000212498	0.998948
REG3A	1.72379	8.02119	3.68607	0.000372649	0.00108594	-0.725156
DMBT1	1.21683	10.7683	3.57721	0.000540436	0.00150667	-1.07474
UGT2B15	-1.17484	8.52671	-3.20411	0.00182584	0.00442574	-2.21041
UGT2B17	-1.042	6.5266	-2.98253	0.00360311	0.00800731	-2.8369

## Sheet: B
ID	Term	Ontology Source	Term PValue	Term PValue Corrected with Bonferroni step down	% Associated Genes	Nr. Genes
GO:0045321	leukocyte activation	GO_BiologicalProcess-EBI-UniProt-GOA-ACAP-ARAP_13.05.2021_00h00	1.38645e-23	7.72251e-21	4.51389	65
GO:0034097	response to cytokine	GO_BiologicalProcess-EBI-UniProt-GOA-ACAP-ARAP_13.05.2021_00h00	2.9343e-23	1.63147e-20	4.76562	61
GO:0051707	response to other organism	GO_BiologicalProcess-EBI-UniProt-GOA-ACAP-ARAP_13.05.2021_00h00	5.96419e-22	3.31013e-19	4.02605	68
GO:0043207	response to external biotic stimulus	GO_BiologicalProcess-EBI-UniProt-GOA-ACAP-ARAP_13.05.2021_00h00	6.802e-22	3.76831e-19	4.01654	68
GO:0002237	response to molecule of bacterial origin	GO_BiologicalProcess-EBI-UniProt-GOA-ACAP-ARAP_13.05.2021_00h00	2.60382e-21	1.43991e-18	8.97098	34
GO:0032496	response to lipopolysaccharide	GO_BiologicalProcess-EBI-UniProt-GOA-ACAP-ARAP_13.05.2021_00h00	5.39405e-21	2.97212e-18	9.16667	33
GO:0016477	cell migration	GO_BiologicalProcess-EBI-UniProt-GOA-ACAP-ARAP_13.05.2021_00h00	8.07892e-21	4.43533e-18	4.00987	65
GO:0019221	cytokine-mediated signaling pathway	GO_BiologicalProcess-EBI-UniProt-GOA-ACAP-ARAP_13.05.2021_00h00	2.40392e-20	1.31735e-17	5.51643	47
GO:0002274	myeloid leukocyte activation	GO_BiologicalProcess-EBI-UniProt-GOA-ACAP-ARAP_13.05.2021_00h00	8.91749e-20	4.86895e-17	5.92286	43
GO:0050900	leukocyte migration	GO_BiologicalProcess-EBI-UniProt-GOA-ACAP-ARAP_13.05.2021_00h00	8.91385e-20	4.87588e-17	6.90909	38
GO:0071345	cellular response to cytokine stimulus	GO_BiologicalProcess-EBI-UniProt-GOA-ACAP-ARAP_13.05.2021_00h00	7.58713e-19	4.13499e-16	4.46504	53
GO:0006954	inflammatory response	GO_BiologicalProcess-EBI-UniProt-GOA-ACAP-ARAP_13.05.2021_00h00	1.32433e-18	7.20435e-16	4.88301	48
GO:0002684	positive regulation of immune system process	GO_BiologicalProcess-EBI-UniProt-GOA-ACAP-ARAP_13.05.2021_00h00	8.56613e-18	4.64284e-15	4.38521	51
GO:0045055	regulated exocytosis	GO_BiologicalProcess-EBI-UniProt-GOA-ACAP-ARAP_13.05.2021_00h00	1.06195e-17	5.74514e-15	5.08083	44
GO:0002443	leukocyte mediated immunity	GO_BiologicalProcess-EBI-UniProt-GOA-ACAP-ARAP_13.05.2021_00h00	1.19963e-17	6.47799e-15	4.72362	47
GO:0002366	leukocyte activation involved in immune response	GO_BiologicalProcess-EBI-UniProt-GOA-ACAP-ARAP_13.05.2021_00h00	1.36382e-17	7.35099e-15	5.30973	42
GO:0002263	cell activation involved in immune response	GO_BiologicalProcess-EBI-UniProt-GOA-ACAP-ARAP_13.05.2021_00h00	1.71056e-17	9.20283e-15	5.27638	42
GO:0030198	extracellular matrix organization	GO_BiologicalProcess-EBI-UniProt-GOA-ACAP-ARAP_13.05.2021_00h00	2.98101e-17	1.6008e-14	7.19101	32
GO:0043062	extracellular structure organization	GO_BiologicalProcess-EBI-UniProt-GOA-ACAP-ARAP_13.05.2021_00h00	3.18164e-17	1.70536e-14	7.17489	32
GO:0045229	external encapsulating structure organization	GO_BiologicalProcess-EBI-UniProt-GOA-ACAP-ARAP_13.05.2021_00h00	3.62243e-17	1.938e-14	7.14286	32
GO:0006887	exocytosis	GO_BiologicalProcess-EBI-UniProt-GOA-ACAP-ARAP_13.05.2021_00h00	3.91426e-17	2.09021e-14	4.68432	46
GO:0001944	vasculature development	GO_BiologicalProcess-EBI-UniProt-GOA-ACAP-ARAP_13.05.2021_00h00	1.16719e-16	6.22111e-14	5.27009	40
GO:0009617	response to bacterium	GO_BiologicalProcess-EBI-UniProt-GOA-ACAP-ARAP_13.05.2021_00h00	4.95488e-16	2.636e-13	5.05051	40
GO:0048514	blood vessel morphogenesis	GO_BiologicalProcess-EBI-UniProt-GOA-ACAP-ARAP_13.05.2021_00h00	7.76476e-16	4.12309e-13	5.59006	36
GO:0001568	blood vessel development	GO_BiologicalProcess-EBI-UniProt-GOA-ACAP-ARAP_13.05.2021_00h00	9.38965e-16	4.97652e-13	5.23416	38
GO:0050865	regulation of cell activation	GO_BiologicalProcess-EBI-UniProt-GOA-ACAP-ARAP_13.05.2021_00h00	1.65518e-15	8.75591e-13	5.29328	37
GO:0002444	myeloid leukocyte mediated immunity	GO_BiologicalProcess-EBI-UniProt-GOA-ACAP-ARAP_13.05.2021_00h00	1.68183e-15	8.88006e-13	5.62701	35
GO:0007159	leukocyte cell-cell adhesion	GO_BiologicalProcess-EBI-UniProt-GOA-ACAP-ARAP_13.05.2021_00h00	1.68709e-15	8.89097e-13	7.38786	28
GO:0030334	regulation of cell migration	GO_BiologicalProcess-EBI-UniProt-GOA-ACAP-ARAP_13.05.2021_00h00	3.67186e-15	1.92773e-12	4.53074	42
GO:0030335	positive regulation of cell migration	GO_BiologicalProcess-EBI-UniProt-GOA-ACAP-ARAP_13.05.2021_00h00	1.10976e-14	5.81515e-12	5.83942	32
GO:0033993	response to lipid	GO_BiologicalProcess-EBI-UniProt-GOA-ACAP-ARAP_13.05.2021_00h00	1.17401e-14	6.14006e-12	4.28287	43
GO:0042119	neutrophil activation	GO_BiologicalProcess-EBI-UniProt-GOA-ACAP-ARAP_13.05.2021_00h00	1.57884e-14	8.24155e-12	5.76577	32
GO:0043299	leukocyte degranulation	GO_BiologicalProcess-EBI-UniProt-GOA-ACAP-ARAP_13.05.2021_00h00	1.86122e-14	9.69697e-12	5.53691	33
GO:0036230	granulocyte activation	GO_BiologicalProcess-EBI-UniProt-GOA-ACAP-ARAP_13.05.2021_00h00	2.12668e-14	1.10587e-11	5.7041	32
GO:0071219	cellular response to molecule of bacterial origin	GO_BiologicalProcess-EBI-UniProt-GOA-ACAP-ARAP_13.05.2021_00h00	2.69084e-14	1.39654e-11	9.81308	21
GO:2000145	regulation of cell motility	GO_BiologicalProcess-EBI-UniProt-GOA-ACAP-ARAP_13.05.2021_00h00	3.60056e-14	1.86509e-11	4.23814	42
GO:2000147	positive regulation of cell motility	GO_BiologicalProcess-EBI-UniProt-GOA-ACAP-ARAP_13.05.2021_00h00	3.63505e-14	1.87932e-11	5.59441	32
GO:0002697	regulation of immune effector process	GO_BiologicalProcess-EBI-UniProt-GOA-ACAP-ARAP_13.05.2021_00h00	3.70221e-14	1.91034e-11	6.2635	29
GO:0002275	myeloid cell activation involved in immune response	GO_BiologicalProcess-EBI-UniProt-GOA-ACAP-ARAP_13.05.2021_00h00	4.31452e-14	2.22198e-11	5.37459	33
GO:0001525	angiogenesis	GO_BiologicalProcess-EBI-UniProt-GOA-ACAP-ARAP_13.05.2021_00h00	6.71591e-14	3.45198e-11	5.66728	31
GO:0051272	positive regulation of cellular component movement	GO_BiologicalProcess-EBI-UniProt-GOA-ACAP-ARAP_13.05.2021_00h00	7.39995e-14	3.79618e-11	5.45145	32
GO:0040017	positive regulation of locomotion	GO_BiologicalProcess-EBI-UniProt-GOA-ACAP-ARAP_13.05.2021_00h00	7.75287e-14	3.96947e-11	5.44218	32
GO:0001817	regulation of cytokine production	GO_BiologicalProcess-EBI-UniProt-GOA-ACAP-ARAP_13.05.2021_00h00	8.00526e-14	4.09069e-11	4.67172	37
GO:0001816	cytokine production	GO_BiologicalProcess-EBI-UniProt-GOA-ACAP-ARAP_13.05.2021_00h00	1.04701e-13	5.33976e-11	4.63079	37
GO:0071222	cellular response to lipopolysaccharide	GO_BiologicalProcess-EBI-UniProt-GOA-ACAP-ARAP_13.05.2021_00h00	1.1582e-13	5.89525e-11	9.80392	20
GO:0071216	cellular response to biotic stimulus	GO_BiologicalProcess-EBI-UniProt-GOA-ACAP-ARAP_13.05.2021_00h00	1.58547e-13	8.03833e-11	8.97436	21
GO:0040012	regulation of locomotion	GO_BiologicalProcess-EBI-UniProt-GOA-ACAP-ARAP_13.05.2021_00h00	1.65522e-13	8.37543e-11	4.05014	42
GO:0097530	granulocyte migration	GO_BiologicalProcess-EBI-UniProt-GOA-ACAP-ARAP_13.05.2021_00h00	2.35492e-13	1.18924e-10	11.1111	18
GO:0042060	wound healing	GO_BiologicalProcess-EBI-UniProt-GOA-ACAP-ARAP_13.05.2021_00h00	2.53278e-13	1.27652e-10	5.3913	31
GO:0097529	myeloid leukocyte migration	GO_BiologicalProcess-EBI-UniProt-GOA-ACAP-ARAP_13.05.2021_00h00	3.06942e-13	1.54392e-10	8.67769	21
GO:0098609	cell-cell adhesion	GO_BiologicalProcess-EBI-UniProt-GOA-ACAP-ARAP_13.05.2021_00h00	3.38686e-13	1.7002e-10	4.23913	39
GO:0060326	cell chemotaxis	GO_BiologicalProcess-EBI-UniProt-GOA-ACAP-ARAP_13.05.2021_00h00	3.87433e-13	1.94104e-10	7.16418	24
GO:0002446	neutrophil mediated immunity	GO_BiologicalProcess-EBI-UniProt-GOA-ACAP-ARAP_13.05.2021_00h00	6.25008e-13	3.12504e-10	5.39568	30
GO:0035239	tube morphogenesis	GO_BiologicalProcess-EBI-UniProt-GOA-ACAP-ARAP_13.05.2021_00h00	7.26892e-13	3.62719e-10	4.23634	38
GO:0002694	regulation of leukocyte activation	GO_BiologicalProcess-EBI-UniProt-GOA-ACAP-ARAP_13.05.2021_00h00	1.16474e-12	5.80039e-10	4.92308	32
GO:1990266	neutrophil migration	GO_BiologicalProcess-EBI-UniProt-GOA-ACAP-ARAP_13.05.2021_00h00	1.35082e-12	6.71356e-10	12.1212	16
GO:0043312	neutrophil degranulation	GO_BiologicalProcess-EBI-UniProt-GOA-ACAP-ARAP_13.05.2021_00h00	1.60998e-12	7.98552e-10	5.39033	29
GO:0002283	neutrophil activation involved in immune response	GO_BiologicalProcess-EBI-UniProt-GOA-ACAP-ARAP_13.05.2021_00h00	2.02264e-12	1.00121e-09	5.3407	29
GO:0022409	positive regulation of cell-cell adhesion	GO_BiologicalProcess-EBI-UniProt-GOA-ACAP-ARAP_13.05.2021_00h00	2.14681e-12	1.06052e-09	7.38255	22
GO:0071621	granulocyte chemotaxis	GO_BiologicalProcess-EBI-UniProt-GOA-ACAP-ARAP_13.05.2021_00h00	2.41869e-12	1.19241e-09	11.6788	16
GO:0009611	response to wounding	GO_BiologicalProcess-EBI-UniProt-GOA-ACAP-ARAP_13.05.2021_00h00	2.58272e-12	1.2707e-09	4.63483	33
GO:0002683	negative regulation of immune system process	GO_BiologicalProcess-EBI-UniProt-GOA-ACAP-ARAP_13.05.2021_00h00	2.99191e-12	1.46903e-09	4.90506	31
GO:0030595	leukocyte chemotaxis	GO_BiologicalProcess-EBI-UniProt-GOA-ACAP-ARAP_13.05.2021_00h00	6.03098e-12	2.94312e-09	7.93651	20
GO:1903039	positive regulation of leukocyte cell-cell adhesion	GO_BiologicalProcess-EBI-UniProt-GOA-ACAP-ARAP_13.05.2021_00h00	6.03098e-12	2.94312e-09	7.93651	20
GO:0031347	regulation of defense response	GO_BiologicalProcess-EBI-UniProt-GOA-ACAP-ARAP_13.05.2021_00h00	1.5926e-11	7.74004e-09	4.00445	36
GO:0050670	regulation of lymphocyte proliferation	GO_BiologicalProcess-EBI-UniProt-GOA-ACAP-ARAP_13.05.2021_00h00	1.87978e-11	9.11694e-09	7.98319	19
GO:0030593	neutrophil chemotaxis	GO_BiologicalProcess-EBI-UniProt-GOA-ACAP-ARAP_13.05.2021_00h00	2.04876e-11	9.91599e-09	12.6126	14
GO:0001819	positive regulation of cytokine production	GO_BiologicalProcess-EBI-UniProt-GOA-ACAP-ARAP_13.05.2021_00h00	2.47377e-11	1.19483e-08	5.18234	27
GO:0032944	regulation of mononuclear cell proliferation	GO_BiologicalProcess-EBI-UniProt-GOA-ACAP-ARAP_13.05.2021_00h00	2.51376e-11	1.21163e-08	7.85124	19
GO:1903037	regulation of leukocyte cell-cell adhesion	GO_BiologicalProcess-EBI-UniProt-GOA-ACAP-ARAP_13.05.2021_00h00	3.42095e-11	1.64206e-08	6.41399	22
GO:0046649	lymphocyte activation	GO_BiologicalProcess-EBI-UniProt-GOA-ACAP-ARAP_13.05.2021_00h00	3.53475e-11	1.69314e-08	4.09146	34
GO:0002685	regulation of leukocyte migration	GO_BiologicalProcess-EBI-UniProt-GOA-ACAP-ARAP_13.05.2021_00h00	6.28709e-11	2.99894e-08	8	18
GO:0030155	regulation of cell adhesion	GO_BiologicalProcess-EBI-UniProt-GOA-ACAP-ARAP_13.05.2021_00h00	7.63104e-11	3.63237e-08	4.19397	32
GO:0070663	regulation of leukocyte proliferation	GO_BiologicalProcess-EBI-UniProt-GOA-ACAP-ARAP_13.05.2021_00h00	8.6952e-11	4.13022e-08	7.30769	19
GO:0051249	regulation of lymphocyte activation	GO_BiologicalProcess-EBI-UniProt-GOA-ACAP-ARAP_13.05.2021_00h00	1.16118e-10	5.50399e-08	4.83871	27
GO:0046651	lymphocyte proliferation	GO_BiologicalProcess-EBI-UniProt-GOA-ACAP-ARAP_13.05.2021_00h00	1.68166e-10	7.93742e-08	6.60066	20
GO:0032943	mononuclear cell proliferation	GO_BiologicalProcess-EBI-UniProt-GOA-ACAP-ARAP_13.05.2021_00h00	2.24693e-10	1.0583e-07	6.49351	20
GO:0002250	adaptive immune response	GO_BiologicalProcess-EBI-UniProt-GOA-ACAP-ARAP_13.05.2021_00h00	2.37246e-10	1.11506e-07	4.01003	32
GO:0022407	regulation of cell-cell adhesion	GO_BiologicalProcess-EBI-UniProt-GOA-ACAP-ARAP_13.05.2021_00h00	2.98665e-10	1.40074e-07	5.21739	24
GO:0002695	negative regulation of leukocyte activation	GO_BiologicalProcess-EBI-UniProt-GOA-ACAP-ARAP_13.05.2021_00h00	4.11681e-10	1.92667e-07	8.33333	16
GO:0050863	regulation of T cell activation	GO_BiologicalProcess-EBI-UniProt-GOA-ACAP-ARAP_13.05.2021_00h00	4.54952e-10	2.12463e-07	5.89888	21
GO:0032693	negative regulation of interleukin-10 production	GO_BiologicalProcess-EBI-UniProt-GOA-ACAP-ARAP_13.05.2021_00h00	5.07368e-10	2.36433e-07	38.8889	7
GO:0050727	regulation of inflammatory response	GO_BiologicalProcess-EBI-UniProt-GOA-ACAP-ARAP_13.05.2021_00h00	6.13855e-10	2.85443e-07	4.65116	26
GO:0042110	T cell activation	GO_BiologicalProcess-EBI-UniProt-GOA-ACAP-ARAP_13.05.2021_00h00	6.82044e-10	3.15786e-07	4.80769	25
GO:0032613	interleukin-10 production	GO_BiologicalProcess-EBI-UniProt-GOA-ACAP-ARAP_13.05.2021_00h00	6.93337e-10	3.20322e-07	17.2414	10
GO:0032653	regulation of interleukin-10 production	GO_BiologicalProcess-EBI-UniProt-GOA-ACAP-ARAP_13.05.2021_00h00	6.93337e-10	3.20322e-07	17.2414	10
GO:0006935	chemotaxis	GO_BiologicalProcess-EBI-UniProt-GOA-ACAP-ARAP_13.05.2021_00h00	9.45337e-10	4.358e-07	4.12518	29
GO:0042330	taxis	GO_BiologicalProcess-EBI-UniProt-GOA-ACAP-ARAP_13.05.2021_00h00	1.04213e-09	4.7938e-07	4.10765	29
GO:0070661	leukocyte proliferation	GO_BiologicalProcess-EBI-UniProt-GOA-ACAP-ARAP_13.05.2021_00h00	1.08587e-09	4.98412e-07	5.93472	20
GO:0050867	positive regulation of cell activation	GO_BiologicalProcess-EBI-UniProt-GOA-ACAP-ARAP_13.05.2021_00h00	1.4361e-09	6.57734e-07	5.03282	23
GO:0045785	positive regulation of cell adhesion	GO_BiologicalProcess-EBI-UniProt-GOA-ACAP-ARAP_13.05.2021_00h00	1.62796e-09	7.4235e-07	5	23
GO:0050730	regulation of peptidyl-tyrosine phosphorylation	GO_BiologicalProcess-EBI-UniProt-GOA-ACAP-ARAP_13.05.2021_00h00	2.05832e-09	9.36536e-07	6.45161	18
GO:0050866	negative regulation of cell activation	GO_BiologicalProcess-EBI-UniProt-GOA-ACAP-ARAP_13.05.2021_00h00	2.16166e-09	9.81395e-07	7.44186	16
GO:0051250	negative regulation of lymphocyte activation	GO_BiologicalProcess-EBI-UniProt-GOA-ACAP-ARAP_13.05.2021_00h00	2.79365e-09	1.26273e-06	8.75	14
GO:0022617	extracellular matrix disassembly	GO_BiologicalProcess-EBI-UniProt-GOA-ACAP-ARAP_13.05.2021_00h00	4.84649e-09	2.17607e-06	12.0879	11
GO:0045765	regulation of angiogenesis	GO_BiologicalProcess-EBI-UniProt-GOA-ACAP-ARAP_13.05.2021_00h00	5.23367e-09	2.34469e-06	6.08108	18
GO:0018108	peptidyl-tyrosine phosphorylation	GO_BiologicalProcess-EBI-UniProt-GOA-ACAP-ARAP_13.05.2021_00h00	6.19657e-09	2.76987e-06	5.09709	21
GO:1901342	regulation of vasculature development	GO_BiologicalProcess-EBI-UniProt-GOA-ACAP-ARAP_13.05.2021_00h00	6.45752e-09	2.88005e-06	6	18
GO:0018212	peptidyl-tyrosine modification	GO_BiologicalProcess-EBI-UniProt-GOA-ACAP-ARAP_13.05.2021_00h00	7.03744e-09	3.13166e-06	5.06024	21
GO:0050868	negative regulation of T cell activation	GO_BiologicalProcess-EBI-UniProt-GOA-ACAP-ARAP_13.05.2021_00h00	1.36921e-08	6.0519e-06	9.6	12
GO:0002774	Fc receptor mediated inhibitory signaling pathway	GO_BiologicalProcess-EBI-UniProt-GOA-ACAP-ARAP_13.05.2021_00h00	1.42294e-08	6.27515e-06	100	4
GO:0070665	positive regulation of leukocyte proliferation	GO_BiologicalProcess-EBI-UniProt-GOA-ACAP-ARAP_13.05.2021_00h00	2.03085e-08	8.89514e-06	8.28025	13
GO:0042116	macrophage activation	GO_BiologicalProcess-EBI-UniProt-GOA-ACAP-ARAP_13.05.2021_00h00	2.72106e-08	1.1891e-05	10.2804	11
GO:1903038	negative regulation of leukocyte cell-cell adhesion	GO_BiologicalProcess-EBI-UniProt-GOA-ACAP-ARAP_13.05.2021_00h00	3.84906e-08	1.67819e-05	8.75912	12
GO:0002460	adaptive immune response based on somatic recombination of immune receptors built from immunoglobulin superfamily domains	GO_BiologicalProcess-EBI-UniProt-GOA-ACAP-ARAP_13.05.2021_00h00	3.97454e-08	1.72893e-05	4.79616	20
GO:0050870	positive regulation of T cell activation	GO_BiologicalProcess-EBI-UniProt-GOA-ACAP-ARAP_13.05.2021_00h00	4.34724e-08	1.88235e-05	6.49351	15
GO:0050672	negative regulation of lymphocyte proliferation	GO_BiologicalProcess-EBI-UniProt-GOA-ACAP-ARAP_13.05.2021_00h00	4.50085e-08	1.94437e-05	11.3636	10
GO:0006909	phagocytosis	GO_BiologicalProcess-EBI-UniProt-GOA-ACAP-ARAP_13.05.2021_00h00	5.22271e-08	2.25099e-05	4.71698	20
GO:0061448	connective tissue development	GO_BiologicalProcess-EBI-UniProt-GOA-ACAP-ARAP_13.05.2021_00h00	5.76048e-08	2.477e-05	5.90406	16
GO:0032945	negative regulation of mononuclear cell proliferation	GO_BiologicalProcess-EBI-UniProt-GOA-ACAP-ARAP_13.05.2021_00h00	6.22741e-08	2.67156e-05	10.989	10
GO:0050671	positive regulation of lymphocyte proliferation	GO_BiologicalProcess-EBI-UniProt-GOA-ACAP-ARAP_13.05.2021_00h00	6.70734e-08	2.86404e-05	8.33333	12
GO:1904018	positive regulation of vasculature development	GO_BiologicalProcess-EBI-UniProt-GOA-ACAP-ARAP_13.05.2021_00h00	6.90405e-08	2.94112e-05	7.47126	13
GO:0045766	positive regulation of angiogenesis	GO_BiologicalProcess-EBI-UniProt-GOA-ACAP-ARAP_13.05.2021_00h00	6.90405e-08	2.94112e-05	7.47126	13
GO:0032946	positive regulation of mononuclear cell proliferation	GO_BiologicalProcess-EBI-UniProt-GOA-ACAP-ARAP_13.05.2021_00h00	7.24246e-08	3.07804e-05	8.27586	12
GO:0042098	T cell proliferation	GO_BiologicalProcess-EBI-UniProt-GOA-ACAP-ARAP_13.05.2021_00h00	9.49078e-08	4.0146e-05	6.63507	14
GO:0050731	positive regulation of peptidyl-tyrosine phosphorylation	GO_BiologicalProcess-EBI-UniProt-GOA-ACAP-ARAP_13.05.2021_00h00	1.06687e-07	4.4915e-05	6.57277	14
GO:0002696	positive regulation of leukocyte activation	GO_BiologicalProcess-EBI-UniProt-GOA-ACAP-ARAP_13.05.2021_00h00	1.14591e-07	4.81283e-05	4.49438	20
GO:0070664	negative regulation of leukocyte proliferation	GO_BiologicalProcess-EBI-UniProt-GOA-ACAP-ARAP_13.05.2021_00h00	1.15067e-07	4.82132e-05	10.3093	10
GO:0042129	regulation of T cell proliferation	GO_BiologicalProcess-EBI-UniProt-GOA-ACAP-ARAP_13.05.2021_00h00	1.17047e-07	4.89255e-05	7.14286	13
GO:1902105	regulation of leukocyte differentiation	GO_BiologicalProcess-EBI-UniProt-GOA-ACAP-ARAP_13.05.2021_00h00	1.2086e-07	5.03985e-05	5.59441	16
GO:0045123	cellular extravasation	GO_BiologicalProcess-EBI-UniProt-GOA-ACAP-ARAP_13.05.2021_00h00	1.33637e-07	5.55929e-05	12	9
GO:0001501	skeletal system development	GO_BiologicalProcess-EBI-UniProt-GOA-ACAP-ARAP_13.05.2021_00h00	1.3472e-07	5.59089e-05	4.08922	22
GO:0071492	cellular response to UV-A	GO_BiologicalProcess-EBI-UniProt-GOA-ACAP-ARAP_13.05.2021_00h00	1.84028e-07	7.61877e-05	38.4615	5
GO:0070486	leukocyte aggregation	GO_BiologicalProcess-EBI-UniProt-GOA-ACAP-ARAP_13.05.2021_00h00	1.84028e-07	7.61877e-05	38.4615	5
GO:1903706	regulation of hemopoiesis	GO_BiologicalProcess-EBI-UniProt-GOA-ACAP-ARAP_13.05.2021_00h00	2.2617e-07	9.2956e-05	4.51306	19
GO:0046634	regulation of alpha-beta T cell activation	GO_BiologicalProcess-EBI-UniProt-GOA-ACAP-ARAP_13.05.2021_00h00	2.92184e-07	0.000119795	9.34579	10
GO:2000106	regulation of leukocyte apoptotic process	GO_BiologicalProcess-EBI-UniProt-GOA-ACAP-ARAP_13.05.2021_00h00	3.24134e-07	0.000132571	10.8434	9
GO:0051216	cartilage development	GO_BiologicalProcess-EBI-UniProt-GOA-ACAP-ARAP_13.05.2021_00h00	4.37997e-07	0.000178265	6.37255	13
GO:0051251	positive regulation of lymphocyte activation	GO_BiologicalProcess-EBI-UniProt-GOA-ACAP-ARAP_13.05.2021_00h00	4.62086e-07	0.000187145	4.52261	18
GO:0002576	platelet degranulation	GO_BiologicalProcess-EBI-UniProt-GOA-ACAP-ARAP_13.05.2021_00h00	4.65966e-07	0.00018825	7.80142	11
GO:0071674	mononuclear cell migration	GO_BiologicalProcess-EBI-UniProt-GOA-ACAP-ARAP_13.05.2021_00h00	5.17417e-07	0.000208519	6.28019	13
GO:0002687	positive regulation of leukocyte migration	GO_BiologicalProcess-EBI-UniProt-GOA-ACAP-ARAP_13.05.2021_00h00	5.75636e-07	0.000231405	7.63889	11
GO:0070141	response to UV-A	GO_BiologicalProcess-EBI-UniProt-GOA-ACAP-ARAP_13.05.2021_00h00	6.07979e-07	0.0002438	31.25	5
GO:0006022	aminoglycan metabolic process	GO_BiologicalProcess-EBI-UniProt-GOA-ACAP-ARAP_13.05.2021_00h00	7.60055e-07	0.000304022	6.66667	12
GO:0002700	regulation of production of molecular mediator of immune response	GO_BiologicalProcess-EBI-UniProt-GOA-ACAP-ARAP_13.05.2021_00h00	8.06232e-07	0.000321686	6.62983	12
GO:0002767	immune response-inhibiting cell surface receptor signaling pathway	GO_BiologicalProcess-EBI-UniProt-GOA-ACAP-ARAP_13.05.2021_00h00	9.62096e-07	0.000382914	50	4
GO:0006959	humoral immune response	GO_BiologicalProcess-EBI-UniProt-GOA-ACAP-ARAP_13.05.2021_00h00	9.70657e-07	0.000385351	4.29594	18
GO:1903510	mucopolysaccharide metabolic process	GO_BiologicalProcess-EBI-UniProt-GOA-ACAP-ARAP_13.05.2021_00h00	9.93077e-07	0.000393259	8.19672	10
GO:0007162	negative regulation of cell adhesion	GO_BiologicalProcess-EBI-UniProt-GOA-ACAP-ARAP_13.05.2021_00h00	1.15377e-06	0.000455739	5.03356	15
GO:0030574	collagen catabolic process	GO_BiologicalProcess-EBI-UniProt-GOA-ACAP-ARAP_13.05.2021_00h00	1.18122e-06	0.000465399	14	7
GO:0042130	negative regulation of T cell proliferation	GO_BiologicalProcess-EBI-UniProt-GOA-ACAP-ARAP_13.05.2021_00h00	1.2308e-06	0.000483704	11.1111	8
GO:0022408	negative regulation of cell-cell adhesion	GO_BiologicalProcess-EBI-UniProt-GOA-ACAP-ARAP_13.05.2021_00h00	1.58912e-06	0.000619756	6.21762	12
GO:0004896	cytokine receptor activity	GO_BiologicalProcess-EBI-UniProt-GOA-ACAP-ARAP_13.05.2021_00h00	1.59621e-06	0.000620927	9	9
GO:1990868	response to chemokine	GO_BiologicalProcess-EBI-UniProt-GOA-ACAP-ARAP_13.05.2021_00h00	1.59621e-06	0.000620927	9	9
GO:1990869	cellular response to chemokine	GO_BiologicalProcess-EBI-UniProt-GOA-ACAP-ARAP_13.05.2021_00h00	1.59621e-06	0.000620927	9	9
GO:0050777	negative regulation of immune response	GO_BiologicalProcess-EBI-UniProt-GOA-ACAP-ARAP_13.05.2021_00h00	1.61094e-06	0.000625045	4.35897	17
GO:0043542	endothelial cell migration	GO_BiologicalProcess-EBI-UniProt-GOA-ACAP-ARAP_13.05.2021_00h00	1.86747e-06	0.000720842	5.60345	13
GO:0002703	regulation of leukocyte mediated immunity	GO_BiologicalProcess-EBI-UniProt-GOA-ACAP-ARAP_13.05.2021_00h00	1.86747e-06	0.000720842	5.60345	13
GO:0030203	glycosaminoglycan metabolic process	GO_BiologicalProcess-EBI-UniProt-GOA-ACAP-ARAP_13.05.2021_00h00	2.21398e-06	0.000850167	6.66667	11
GO:0002831	regulation of response to biotic stimulus	GO_BiologicalProcess-EBI-UniProt-GOA-ACAP-ARAP_13.05.2021_00h00	2.20921e-06	0.000850546	4.05405	18
GO:0030099	myeloid cell differentiation	GO_BiologicalProcess-EBI-UniProt-GOA-ACAP-ARAP_13.05.2021_00h00	2.28017e-06	0.000873305	4.04494	18
GO:0042102	positive regulation of T cell proliferation	GO_BiologicalProcess-EBI-UniProt-GOA-ACAP-ARAP_13.05.2021_00h00	2.40478e-06	0.000918624	8.57143	9
GO:0002064	epithelial cell development	GO_BiologicalProcess-EBI-UniProt-GOA-ACAP-ARAP_13.05.2021_00h00	2.59551e-06	0.000988888	5.43933	13
GO:0002765	immune response-inhibiting signal transduction	GO_BiologicalProcess-EBI-UniProt-GOA-ACAP-ARAP_13.05.2021_00h00	2.83671e-06	0.00107795	40	4
GO:0002688	regulation of leukocyte chemotaxis	GO_BiologicalProcess-EBI-UniProt-GOA-ACAP-ARAP_13.05.2021_00h00	2.86329e-06	0.00108519	7.29927	10
GO:0071887	leukocyte apoptotic process	GO_BiologicalProcess-EBI-UniProt-GOA-ACAP-ARAP_13.05.2021_00h00	3.04226e-06	0.00114997	8.33333	9
GO:0007492	endoderm development	GO_BiologicalProcess-EBI-UniProt-GOA-ACAP-ARAP_13.05.2021_00h00	3.33578e-06	0.00125759	9.7561	8
GO:0006024	glycosaminoglycan biosynthetic process	GO_BiologicalProcess-EBI-UniProt-GOA-ACAP-ARAP_13.05.2021_00h00	3.54369e-06	0.00133243	8.18182	9
GO:0002698	negative regulation of immune effector process	GO_BiologicalProcess-EBI-UniProt-GOA-ACAP-ARAP_13.05.2021_00h00	4.11455e-06	0.00153473	8.03571	9
GO:0002699	positive regulation of immune effector process	GO_BiologicalProcess-EBI-UniProt-GOA-ACAP-ARAP_13.05.2021_00h00	4.25307e-06	0.00157789	5.2	13
GO:0002286	T cell activation involved in immune response	GO_BiologicalProcess-EBI-UniProt-GOA-ACAP-ARAP_13.05.2021_00h00	5.11825e-06	0.00189375	7.82609	9
GO:0031295	T cell costimulation	GO_BiologicalProcess-EBI-UniProt-GOA-ACAP-ARAP_13.05.2021_00h00	5.20103e-06	0.00191918	11.2903	7
GO:0070555	response to interleukin-1	GO_BiologicalProcess-EBI-UniProt-GOA-ACAP-ARAP_13.05.2021_00h00	5.61418e-06	0.00206041	5.50459	12
GO:0002440	production of molecular mediator of immune response	GO_BiologicalProcess-EBI-UniProt-GOA-ACAP-ARAP_13.05.2021_00h00	5.61418e-06	0.00206041	5.50459	12
GO:0001818	negative regulation of cytokine production	GO_BiologicalProcess-EBI-UniProt-GOA-ACAP-ARAP_13.05.2021_00h00	6.09537e-06	0.0022309	4.68227	14
GO:0006023	aminoglycan biosynthetic process	GO_BiologicalProcess-EBI-UniProt-GOA-ACAP-ARAP_13.05.2021_00h00	6.32503e-06	0.00230864	7.62712	9
GO:0031294	lymphocyte costimulation	GO_BiologicalProcess-EBI-UniProt-GOA-ACAP-ARAP_13.05.2021_00h00	6.44861e-06	0.00234729	10.9375	7
GO:0070098	chemokine-mediated signaling pathway	GO_BiologicalProcess-EBI-UniProt-GOA-ACAP-ARAP_13.05.2021_00h00	6.72897e-06	0.00243589	8.88889	8
GO:0030206	chondroitin sulfate biosynthetic process	GO_BiologicalProcess-EBI-UniProt-GOA-ACAP-ARAP_13.05.2021_00h00	6.82171e-06	0.00246264	20	5
GO:0002573	myeloid leukocyte differentiation	GO_BiologicalProcess-EBI-UniProt-GOA-ACAP-ARAP_13.05.2021_00h00	8.10128e-06	0.00291646	5.30973	12
GO:0035987	endodermal cell differentiation	GO_BiologicalProcess-EBI-UniProt-GOA-ACAP-ARAP_13.05.2021_00h00	8.22321e-06	0.00295213	13.6364	6
GO:0046637	regulation of alpha-beta T cell differentiation	GO_BiologicalProcess-EBI-UniProt-GOA-ACAP-ARAP_13.05.2021_00h00	8.77908e-06	0.00314291	10.4478	7
GO:0010631	epithelial cell migration	GO_BiologicalProcess-EBI-UniProt-GOA-ACAP-ARAP_13.05.2021_00h00	9.53292e-06	0.00340325	4.50161	14
GO:2000514	regulation of CD4-positive, alpha-beta T cell activation	GO_BiologicalProcess-EBI-UniProt-GOA-ACAP-ARAP_13.05.2021_00h00	9.69594e-06	0.00345175	10.2941	7
GO:0090132	epithelium migration	GO_BiologicalProcess-EBI-UniProt-GOA-ACAP-ARAP_13.05.2021_00h00	1.06238e-05	0.00375018	4.4586	14
GO:0031623	receptor internalization	GO_BiologicalProcess-EBI-UniProt-GOA-ACAP-ARAP_13.05.2021_00h00	1.07985e-05	0.00380107	7.14286	9
GO:0046631	alpha-beta T cell activation	GO_BiologicalProcess-EBI-UniProt-GOA-ACAP-ARAP_13.05.2021_00h00	1.14039e-05	0.00400276	6.25	10
GO:0006898	receptor-mediated endocytosis	GO_BiologicalProcess-EBI-UniProt-GOA-ACAP-ARAP_13.05.2021_00h00	1.26756e-05	0.00442379	4.13223	15
GO:0001655	urogenital system development	GO_BiologicalProcess-EBI-UniProt-GOA-ACAP-ARAP_13.05.2021_00h00	1.53708e-05	0.00528754	4.06504	15
GO:0033627	cell adhesion mediated by integrin	GO_BiologicalProcess-EBI-UniProt-GOA-ACAP-ARAP_13.05.2021_00h00	1.70223e-05	0.00583866	9.45946	7
GO:0050650	chondroitin sulfate proteoglycan biosynthetic process	GO_BiologicalProcess-EBI-UniProt-GOA-ACAP-ARAP_13.05.2021_00h00	1.74962e-05	0.0059662	16.6667	5
GO:0050920	regulation of chemotaxis	GO_BiologicalProcess-EBI-UniProt-GOA-ACAP-ARAP_13.05.2021_00h00	1.74798e-05	0.00597809	4.91803	12
GO:0003158	endothelium development	GO_BiologicalProcess-EBI-UniProt-GOA-ACAP-ARAP_13.05.2021_00h00	1.88221e-05	0.00638069	6.66667	9
GO:1902106	negative regulation of leukocyte differentiation	GO_BiologicalProcess-EBI-UniProt-GOA-ACAP-ARAP_13.05.2021_00h00	1.96033e-05	0.00662591	7.69231	8
GO:0097028	dendritic cell differentiation	GO_BiologicalProcess-EBI-UniProt-GOA-ACAP-ARAP_13.05.2021_00h00	1.96774e-05	0.00663128	11.7647	6
GO:0010863	positive regulation of phospholipase C activity	GO_BiologicalProcess-EBI-UniProt-GOA-ACAP-ARAP_13.05.2021_00h00	1.96774e-05	0.00663128	11.7647	6
GO:0001885	endothelial cell development	GO_BiologicalProcess-EBI-UniProt-GOA-ACAP-ARAP_13.05.2021_00h00	2.02986e-05	0.00682034	9.21053	7
GO:0002507	tolerance induction	GO_BiologicalProcess-EBI-UniProt-GOA-ACAP-ARAP_13.05.2021_00h00	2.0675e-05	0.00690545	16.129	5
GO:0034341	response to interferon-gamma	GO_BiologicalProcess-EBI-UniProt-GOA-ACAP-ARAP_13.05.2021_00h00	2.10468e-05	0.00700859	5.26316	11
GO:0045088	regulation of innate immune response	GO_BiologicalProcess-EBI-UniProt-GOA-ACAP-ARAP_13.05.2021_00h00	2.11688e-05	0.00702805	4.19162	14
GO:0044409	entry into host	GO_BiologicalProcess-EBI-UniProt-GOA-ACAP-ARAP_13.05.2021_00h00	2.13972e-05	0.00708248	5.81395	10
GO:0002367	cytokine production involved in immune response	GO_BiologicalProcess-EBI-UniProt-GOA-ACAP-ARAP_13.05.2021_00h00	2.25253e-05	0.00743334	7.54717	8
GO:0002718	regulation of cytokine production involved in immune response	GO_BiologicalProcess-EBI-UniProt-GOA-ACAP-ARAP_13.05.2021_00h00	2.25253e-05	0.00743334	7.54717	8
GO:1903707	negative regulation of hemopoiesis	GO_BiologicalProcess-EBI-UniProt-GOA-ACAP-ARAP_13.05.2021_00h00	2.25253e-05	0.00743334	7.54717	8
GO:1900274	regulation of phospholipase C activity	GO_BiologicalProcess-EBI-UniProt-GOA-ACAP-ARAP_13.05.2021_00h00	2.4629e-05	0.0080783	11.3208	6
GO:0002248	connective tissue replacement involved in inflammatory response wound healing	GO_BiologicalProcess-EBI-UniProt-GOA-ACAP-ARAP_13.05.2021_00h00	2.55997e-05	0.00837109	50	3
GO:0001706	endoderm formation	GO_BiologicalProcess-EBI-UniProt-GOA-ACAP-ARAP_13.05.2021_00h00	2.74554e-05	0.00895045	11.1111	6
GO:1904645	response to amyloid-beta	GO_BiologicalProcess-EBI-UniProt-GOA-ACAP-ARAP_13.05.2021_00h00	2.74554e-05	0.00895045	11.1111	6
GO:0033273	response to vitamin	GO_BiologicalProcess-EBI-UniProt-GOA-ACAP-ARAP_13.05.2021_00h00	2.75878e-05	0.00896603	7.33945	8
GO:0030199	collagen fibril organization	GO_BiologicalProcess-EBI-UniProt-GOA-ACAP-ARAP_13.05.2021_00h00	2.94736e-05	0.00954944	7.27273	8
GO:0051924	regulation of calcium ion transport	GO_BiologicalProcess-EBI-UniProt-GOA-ACAP-ARAP_13.05.2021_00h00	3.26819e-05	0.0105562	4.61538	12
GO:0050729	positive regulation of inflammatory response	GO_BiologicalProcess-EBI-UniProt-GOA-ACAP-ARAP_13.05.2021_00h00	3.32051e-05	0.010692	6.2069	9
GO:0001618	virus receptor activity	GO_BiologicalProcess-EBI-UniProt-GOA-ACAP-ARAP_13.05.2021_00h00	3.33863e-05	0.010717	8.53659	7
GO:0070374	positive regulation of ERK1 and ERK2 cascade	GO_BiologicalProcess-EBI-UniProt-GOA-ACAP-ARAP_13.05.2021_00h00	3.37637e-05	0.0108044	5	11
GO:0061028	establishment of endothelial barrier	GO_BiologicalProcess-EBI-UniProt-GOA-ACAP-ARAP_13.05.2021_00h00	3.38899e-05	0.0108109	10.7143	6
GO:0060541	respiratory system development	GO_BiologicalProcess-EBI-UniProt-GOA-ACAP-ARAP_13.05.2021_00h00	3.51942e-05	0.0111918	4.97738	11
GO:0010517	regulation of phospholipase activity	GO_BiologicalProcess-EBI-UniProt-GOA-ACAP-ARAP_13.05.2021_00h00	3.90446e-05	0.0123381	8.33333	7
GO:0043112	receptor metabolic process	GO_BiologicalProcess-EBI-UniProt-GOA-ACAP-ARAP_13.05.2021_00h00	4.18023e-05	0.0131259	5.37634	10
GO:0043491	protein kinase B signaling	GO_BiologicalProcess-EBI-UniProt-GOA-ACAP-ARAP_13.05.2021_00h00	4.23228e-05	0.013247	4.49438	12
GO:0032609	interferon-gamma production	GO_BiologicalProcess-EBI-UniProt-GOA-ACAP-ARAP_13.05.2021_00h00	4.32007e-05	0.0134786	6.89655	8
GO:0032649	regulation of interferon-gamma production	GO_BiologicalProcess-EBI-UniProt-GOA-ACAP-ARAP_13.05.2021_00h00	4.32007e-05	0.0134786	6.89655	8
GO:0002246	wound healing involved in inflammatory response	GO_BiologicalProcess-EBI-UniProt-GOA-ACAP-ARAP_13.05.2021_00h00	4.44355e-05	0.0138194	42.8571	3
GO:0010959	regulation of metal ion transport	GO_BiologicalProcess-EBI-UniProt-GOA-ACAP-ARAP_13.05.2021_00h00	4.54943e-05	0.0141032	4.46097	12
GO:0045580	regulation of T cell differentiation	GO_BiologicalProcess-EBI-UniProt-GOA-ACAP-ARAP_13.05.2021_00h00	4.80727e-05	0.0148545	5.92105	9
GO:0032695	negative regulation of interleukin-12 production	GO_BiologicalProcess-EBI-UniProt-GOA-ACAP-ARAP_13.05.2021_00h00	4.8437e-05	0.0149186	21.0526	4
GO:0010595	positive regulation of endothelial cell migration	GO_BiologicalProcess-EBI-UniProt-GOA-ACAP-ARAP_13.05.2021_00h00	4.88195e-05	0.0149876	6.77966	8
GO:0001822	kidney development	GO_BiologicalProcess-EBI-UniProt-GOA-ACAP-ARAP_13.05.2021_00h00	5.06639e-05	0.0153005	4.11392	13
GO:0051897	positive regulation of protein kinase B signaling	GO_BiologicalProcess-EBI-UniProt-GOA-ACAP-ARAP_13.05.2021_00h00	5.00461e-05	0.0153141	5.26316	10
GO:0002819	regulation of adaptive immune response	GO_BiologicalProcess-EBI-UniProt-GOA-ACAP-ARAP_13.05.2021_00h00	5.00461e-05	0.0153141	5.26316	10
GO:0043536	positive regulation of blood vessel endothelial cell migration	GO_BiologicalProcess-EBI-UniProt-GOA-ACAP-ARAP_13.05.2021_00h00	5.03802e-05	0.0153156	10	6
GO:0002886	regulation of myeloid leukocyte mediated immunity	GO_BiologicalProcess-EBI-UniProt-GOA-ACAP-ARAP_13.05.2021_00h00	5.03802e-05	0.0153156	10	6
GO:0002820	negative regulation of adaptive immune response	GO_BiologicalProcess-EBI-UniProt-GOA-ACAP-ARAP_13.05.2021_00h00	5.03802e-05	0.0153156	10	6
GO:0002920	regulation of humoral immune response	GO_BiologicalProcess-EBI-UniProt-GOA-ACAP-ARAP_13.05.2021_00h00	5.05967e-05	0.0153308	5.88235	9
GO:0002691	regulation of cellular extravasation	GO_BiologicalProcess-EBI-UniProt-GOA-ACAP-ARAP_13.05.2021_00h00	5.02703e-05	0.0153324	13.5135	5
GO:0071675	regulation of mononuclear cell migration	GO_BiologicalProcess-EBI-UniProt-GOA-ACAP-ARAP_13.05.2021_00h00	5.18495e-05	0.0156067	6.72269	8
GO:0030324	lung development	GO_BiologicalProcess-EBI-UniProt-GOA-ACAP-ARAP_13.05.2021_00h00	5.4663e-05	0.0163989	5.20833	10
GO:0045446	endothelial cell differentiation	GO_BiologicalProcess-EBI-UniProt-GOA-ACAP-ARAP_13.05.2021_00h00	5.50346e-05	0.0164553	6.66667	8
GO:0002761	regulation of myeloid leukocyte differentiation	GO_BiologicalProcess-EBI-UniProt-GOA-ACAP-ARAP_13.05.2021_00h00	5.83809e-05	0.0173391	6.61157	8
GO:0046718	viral entry into host cell	GO_BiologicalProcess-EBI-UniProt-GOA-ACAP-ARAP_13.05.2021_00h00	5.88498e-05	0.0174195	5.76923	9
GO:0031960	response to corticosteroid	GO_BiologicalProcess-EBI-UniProt-GOA-ACAP-ARAP_13.05.2021_00h00	6.22668e-05	0.0183064	5.12821	10
GO:0048661	positive regulation of smooth muscle cell proliferation	GO_BiologicalProcess-EBI-UniProt-GOA-ACAP-ARAP_13.05.2021_00h00	6.53867e-05	0.0190275	7.69231	7
GO:0030323	respiratory tube development	GO_BiologicalProcess-EBI-UniProt-GOA-ACAP-ARAP_13.05.2021_00h00	6.49935e-05	0.0190431	5.10204	10
GO:0045622	regulation of T-helper cell differentiation	GO_BiologicalProcess-EBI-UniProt-GOA-ACAP-ARAP_13.05.2021_00h00	6.52242e-05	0.0190455	12.8205	5
GO:0043030	regulation of macrophage activation	GO_BiologicalProcess-EBI-UniProt-GOA-ACAP-ARAP_13.05.2021_00h00	6.65271e-05	0.0192929	9.52381	6
GO:0002704	negative regulation of leukocyte mediated immunity	GO_BiologicalProcess-EBI-UniProt-GOA-ACAP-ARAP_13.05.2021_00h00	7.27421e-05	0.020877	9.375	6
GO:0030204	chondroitin sulfate metabolic process	GO_BiologicalProcess-EBI-UniProt-GOA-ACAP-ARAP_13.05.2021_00h00	7.38793e-05	0.0211295	12.5	5
GO:0010634	positive regulation of epithelial cell migration	GO_BiologicalProcess-EBI-UniProt-GOA-ACAP-ARAP_13.05.2021_00h00	7.51217e-05	0.0214097	5.59006	9
GO:0052126	movement in host environment	GO_BiologicalProcess-EBI-UniProt-GOA-ACAP-ARAP_13.05.2021_00h00	7.69404e-05	0.0218511	5	10
GO:0002285	lymphocyte activation involved in immune response	GO_BiologicalProcess-EBI-UniProt-GOA-ACAP-ARAP_13.05.2021_00h00	7.69404e-05	0.0218511	5	10
GO:0034113	heterotypic cell-cell adhesion	GO_BiologicalProcess-EBI-UniProt-GOA-ACAP-ARAP_13.05.2021_00h00	7.94115e-05	0.022394	9.23077	6
GO:0030888	regulation of B cell proliferation	GO_BiologicalProcess-EBI-UniProt-GOA-ACAP-ARAP_13.05.2021_00h00	7.94115e-05	0.022394	9.23077	6
GO:0008360	regulation of cell shape	GO_BiologicalProcess-EBI-UniProt-GOA-ACAP-ARAP_13.05.2021_00h00	8.26134e-05	0.0232144	5.52147	9
GO:0002701	negative regulation of production of molecular mediator of immune response	GO_BiologicalProcess-EBI-UniProt-GOA-ACAP-ARAP_13.05.2021_00h00	8.33925e-05	0.0233499	12.1951	5
GO:0001776	leukocyte homeostasis	GO_BiologicalProcess-EBI-UniProt-GOA-ACAP-ARAP_13.05.2021_00h00	8.60185e-05	0.0239991	7.36842	7
GO:0030449	regulation of complement activation	GO_BiologicalProcess-EBI-UniProt-GOA-ACAP-ARAP_13.05.2021_00h00	8.68769e-05	0.0240649	6.25	8
GO:0002224	toll-like receptor signaling pathway	GO_BiologicalProcess-EBI-UniProt-GOA-ACAP-ARAP_13.05.2021_00h00	8.65885e-05	0.0240716	5.4878	9
GO:0004252	serine-type endopeptidase activity	GO_BiologicalProcess-EBI-UniProt-GOA-ACAP-ARAP_13.05.2021_00h00	9.33686e-05	0.0256764	4.13793	12
GO:0060840	artery development	GO_BiologicalProcess-EBI-UniProt-GOA-ACAP-ARAP_13.05.2021_00h00	9.81646e-05	0.0268971	7.2165	7
GO:0044272	sulfur compound biosynthetic process	GO_BiologicalProcess-EBI-UniProt-GOA-ACAP-ARAP_13.05.2021_00h00	0.0001065	0.0290745	4.80769	10
GO:0002523	leukocyte migration involved in inflammatory response	GO_BiologicalProcess-EBI-UniProt-GOA-ACAP-ARAP_13.05.2021_00h00	0.000106904	0.0290778	17.3913	4
GO:1904996	positive regulation of leukocyte adhesion to vascular endothelial cell	GO_BiologicalProcess-EBI-UniProt-GOA-ACAP-ARAP_13.05.2021_00h00	0.000106904	0.0290778	17.3913	4
GO:0090050	positive regulation of cell migration involved in sprouting angiogenesis	GO_BiologicalProcess-EBI-UniProt-GOA-ACAP-ARAP_13.05.2021_00h00	0.000106904	0.0290778	17.3913	4
GO:0050764	regulation of phagocytosis	GO_BiologicalProcess-EBI-UniProt-GOA-ACAP-ARAP_13.05.2021_00h00	0.00011897	0.0322409	7	7
GO:0007565	female pregnancy	GO_BiologicalProcess-EBI-UniProt-GOA-ACAP-ARAP_13.05.2021_00h00	0.000119823	0.0323522	4.73934	10
GO:0006026	aminoglycan catabolic process	GO_BiologicalProcess-EBI-UniProt-GOA-ACAP-ARAP_13.05.2021_00h00	0.000120436	0.0323972	8.57143	6
GO:0048872	homeostasis of number of cells	GO_BiologicalProcess-EBI-UniProt-GOA-ACAP-ARAP_13.05.2021_00h00	0.000124475	0.0333593	4.01338	12
GO:0050765	negative regulation of phagocytosis	GO_BiologicalProcess-EBI-UniProt-GOA-ACAP-ARAP_13.05.2021_00h00	0.000127183	0.0337035	16.6667	4
GO:0005125	cytokine activity	GO_BiologicalProcess-EBI-UniProt-GOA-ACAP-ARAP_13.05.2021_00h00	0.000127029	0.0337896	4.31373	11
GO:0030316	osteoclast differentiation	GO_BiologicalProcess-EBI-UniProt-GOA-ACAP-ARAP_13.05.2021_00h00	0.000126651	0.0338159	6.93069	7
GO:0048844	artery morphogenesis	GO_BiologicalProcess-EBI-UniProt-GOA-ACAP-ARAP_13.05.2021_00h00	0.000130359	0.0344148	8.4507	6
GO:0010518	positive regulation of phospholipase activity	GO_BiologicalProcess-EBI-UniProt-GOA-ACAP-ARAP_13.05.2021_00h00	0.000130359	0.0344148	8.4507	6
GO:0014002	astrocyte development	GO_BiologicalProcess-EBI-UniProt-GOA-ACAP-ARAP_13.05.2021_00h00	0.00013119	0.0345031	11.1111	5
GO:0050654	chondroitin sulfate proteoglycan metabolic process	GO_BiologicalProcess-EBI-UniProt-GOA-ACAP-ARAP_13.05.2021_00h00	0.00013119	0.0345031	11.1111	5
GO:0002822	regulation of adaptive immune response based on somatic recombination of immune receptors built from immunoglobulin superfamily domains	GO_BiologicalProcess-EBI-UniProt-GOA-ACAP-ARAP_13.05.2021_00h00	0.000142006	0.0372055	5.14286	9
GO:0043300	regulation of leukocyte degranulation	GO_BiologicalProcess-EBI-UniProt-GOA-ACAP-ARAP_13.05.2021_00h00	0.000145883	0.0380754	10.8696	5
GO:0060638	mesenchymal-epithelial cell signaling	GO_BiologicalProcess-EBI-UniProt-GOA-ACAP-ARAP_13.05.2021_00h00	0.000148671	0.0385059	30	3
GO:0051384	response to glucocorticoid	GO_BiologicalProcess-EBI-UniProt-GOA-ACAP-ARAP_13.05.2021_00h00	0.000148253	0.0385458	5.11364	9
GO:0045637	regulation of myeloid cell differentiation	GO_BiologicalProcess-EBI-UniProt-GOA-ACAP-ARAP_13.05.2021_00h00	0.00015059	0.0387017	4.23077	11
GO:0032753	positive regulation of interleukin-4 production	GO_BiologicalProcess-EBI-UniProt-GOA-ACAP-ARAP_13.05.2021_00h00	0.000150109	0.0387281	16	4
GO:0010594	regulation of endothelial cell migration	GO_BiologicalProcess-EBI-UniProt-GOA-ACAP-ARAP_13.05.2021_00h00	0.000154728	0.0394558	5.08475	9
GO:0035710	CD4-positive, alpha-beta T cell activation	GO_BiologicalProcess-EBI-UniProt-GOA-ACAP-ARAP_13.05.2021_00h00	0.000161509	0.0410234	6.66667	7
GO:0002548	monocyte chemotaxis	GO_BiologicalProcess-EBI-UniProt-GOA-ACAP-ARAP_13.05.2021_00h00	0.000164068	0.0415093	8.10811	6
GO:0051701	biological process involved in interaction with host	GO_BiologicalProcess-EBI-UniProt-GOA-ACAP-ARAP_13.05.2021_00h00	0.000166437	0.0419421	4.18251	11
GO:0045619	regulation of lymphocyte differentiation	GO_BiologicalProcess-EBI-UniProt-GOA-ACAP-ARAP_13.05.2021_00h00	0.000168389	0.0422656	5.02793	9
GO:0032967	positive regulation of collagen biosynthetic process	GO_BiologicalProcess-EBI-UniProt-GOA-ACAP-ARAP_13.05.2021_00h00	0.000175879	0.043794	15.3846	4
GO:0002292	T cell differentiation involved in immune response	GO_BiologicalProcess-EBI-UniProt-GOA-ACAP-ARAP_13.05.2021_00h00	0.000176718	0.043826	8	6
GO:0071548	response to dexamethasone	GO_BiologicalProcess-EBI-UniProt-GOA-ACAP-ARAP_13.05.2021_00h00	0.000179013	0.0440371	10.4167	5
GO:2001243	negative regulation of intrinsic apoptotic signaling pathway	GO_BiologicalProcess-EBI-UniProt-GOA-ACAP-ARAP_13.05.2021_00h00	0.000192443	0.0471484	6.48148	7
GO:0061756	leukocyte adhesion to vascular endothelial cell	GO_BiologicalProcess-EBI-UniProt-GOA-ACAP-ARAP_13.05.2021_00h00	0.000197587	0.0482111	10.2041	5
GO:0097709	connective tissue replacement	GO_BiologicalProcess-EBI-UniProt-GOA-ACAP-ARAP_13.05.2021_00h00	0.000202766	0.0490693	27.2727	3
GO:0045625	regulation of T-helper 1 cell differentiation	GO_BiologicalProcess-EBI-UniProt-GOA-ACAP-ARAP_13.05.2021_00h00	0.000202766	0.0490693	27.2727	3
GO:0002645	positive regulation of tolerance induction	GO_BiologicalProcess-EBI-UniProt-GOA-ACAP-ARAP_13.05.2021_00h00	0.000202766	0.0490693	27.2727	3
GO:0010714	positive regulation of collagen metabolic process	GO_BiologicalProcess-EBI-UniProt-GOA-ACAP-ARAP_13.05.2021_00h00	0.000204697	0.0491272	14.8148	4
GO:2000108	positive regulation of leukocyte apoptotic process	GO_BiologicalProcess-EBI-UniProt-GOA-ACAP-ARAP_13.05.2021_00h00	0.000204697	0.0491272	14.8148	4
GO:0010951	negative regulation of endopeptidase activity	GO_BiologicalProcess-EBI-UniProt-GOA-ACAP-ARAP_13.05.2021_00h00	0.000202412	0.0491862	4.08922	11
GO:0048660	regulation of smooth muscle cell proliferation	GO_BiologicalProcess-EBI-UniProt-GOA-ACAP-ARAP_13.05.2021_00h00	0.000206361	0.0493203	5.51724	8
GO:0033866	nucleoside bisphosphate biosynthetic process	GO_BiologicalProcess-EBI-UniProt-GOA-ACAP-ARAP_13.05.2021_00h00	0.049741	0.049741	4	3
GO:0034033	purine nucleoside bisphosphate biosynthetic process	GO_BiologicalProcess-EBI-UniProt-GOA-ACAP-ARAP_13.05.2021_00h00	0.049741	0.049741	4	3
GO:0034030	ribonucleoside bisphosphate biosynthetic process	GO_BiologicalProcess-EBI-UniProt-GOA-ACAP-ARAP_13.05.2021_00h00	0.049741	0.049741	4	3
GO:0031012	extracellular matrix	GO_CellularComponent-EBI-UniProt-GOA-ACAP-ARAP_13.05.2021_00h00	5.31707e-21	2.93502e-18	6.77686	41
GO:0030312	external encapsulating structure	GO_CellularComponent-EBI-UniProt-GOA-ACAP-ARAP_13.05.2021_00h00	5.65175e-21	3.10846e-18	6.76568	41
GO:0062023	collagen-containing extracellular matrix	GO_CellularComponent-EBI-UniProt-GOA-ACAP-ARAP_13.05.2021_00h00	7.5026e-18	4.07391e-15	7.23684	33
GO:0030141	secretory granule	GO_CellularComponent-EBI-UniProt-GOA-ACAP-ARAP_13.05.2021_00h00	1.46924e-13	7.46372e-11	4.2508	40
GO:0009897	external side of plasma membrane	GO_CellularComponent-EBI-UniProt-GOA-ACAP-ARAP_13.05.2021_00h00	3.38643e-12	1.65935e-09	5.89569	26
GO:0030667	secretory granule membrane	GO_CellularComponent-EBI-UniProt-GOA-ACAP-ARAP_13.05.2021_00h00	3.56443e-12	1.74301e-09	6.80473	23
GO:0098552	side of membrane	GO_CellularComponent-EBI-UniProt-GOA-ACAP-ARAP_13.05.2021_00h00	1.28439e-11	6.255e-09	4.63378	31
GO:0101002	ficolin-1-rich granule	GO_CellularComponent-EBI-UniProt-GOA-ACAP-ARAP_13.05.2021_00h00	9.37411e-09	4.1621e-06	7.28155	15
GO:0070820	tertiary granule	GO_CellularComponent-EBI-UniProt-GOA-ACAP-ARAP_13.05.2021_00h00	1.10979e-08	4.91637e-06	7.86517	14
GO:0005604	basement membrane	GO_CellularComponent-EBI-UniProt-GOA-ACAP-ARAP_13.05.2021_00h00	1.47859e-08	6.5058e-06	10.8911	11
GO:0101003	ficolin-1-rich granule membrane	GO_CellularComponent-EBI-UniProt-GOA-ACAP-ARAP_13.05.2021_00h00	4.29026e-08	1.86197e-05	13.6364	9
GO:0031091	platelet alpha granule	GO_CellularComponent-EBI-UniProt-GOA-ACAP-ARAP_13.05.2021_00h00	1.23387e-06	0.000483677	9.27835	9
GO:0070821	tertiary granule membrane	GO_CellularComponent-EBI-UniProt-GOA-ACAP-ARAP_13.05.2021_00h00	1.86731e-06	0.00072265	10.5263	8
GO:0034774	secretory granule lumen	GO_CellularComponent-EBI-UniProt-GOA-ACAP-ARAP_13.05.2021_00h00	1.18755e-05	0.00415642	4.15512	15
GO:0060205	cytoplasmic vesicle lumen	GO_CellularComponent-EBI-UniProt-GOA-ACAP-ARAP_13.05.2021_00h00	1.35232e-05	0.00470608	4.10959	15
GO:0031093	platelet alpha granule lumen	GO_CellularComponent-EBI-UniProt-GOA-ACAP-ARAP_13.05.2021_00h00	1.41956e-05	0.00492588	9.72222	7
GO:0031983	vesicle lumen	GO_CellularComponent-EBI-UniProt-GOA-ACAP-ARAP_13.05.2021_00h00	1.44208e-05	0.00498958	4.08719	15
GO:0005788	endoplasmic reticulum lumen	GO_CellularComponent-EBI-UniProt-GOA-ACAP-ARAP_13.05.2021_00h00	2.0478e-05	0.00686014	4.2042	14
GO:0016323	basolateral plasma membrane	GO_CellularComponent-EBI-UniProt-GOA-ACAP-ARAP_13.05.2021_00h00	6.88515e-05	0.0198981	4.62185	11
GO:0005902	microvillus	GO_CellularComponent-EBI-UniProt-GOA-ACAP-ARAP_13.05.2021_00h00	7.01185e-05	0.0201941	7.6087	7
GO:0009925	basal plasma membrane	GO_CellularComponent-EBI-UniProt-GOA-ACAP-ARAP_13.05.2021_00h00	0.00017777	0.0439092	4.15094	11
GO:0140375	immune receptor activity	GO_MolecularFunction-EBI-UniProt-GOA-ACAP-ARAP_13.05.2021_00h00	5.141e-11	2.4574e-08	10.5634	15
GO:0005518	collagen binding	GO_MolecularFunction-EBI-UniProt-GOA-ACAP-ARAP_13.05.2021_00h00	1.39869e-10	6.61582e-08	16.6667	11
GO:0050786	RAGE receptor binding	GO_MolecularFunction-EBI-UniProt-GOA-ACAP-ARAP_13.05.2021_00h00	2.83671e-06	0.00107795	40	4
GO:0005126	cytokine receptor binding	GO_MolecularFunction-EBI-UniProt-GOA-ACAP-ARAP_13.05.2021_00h00	3.65601e-06	0.001371	4.8951	14
GO:0005539	glycosaminoglycan binding	GO_MolecularFunction-EBI-UniProt-GOA-ACAP-ARAP_13.05.2021_00h00	3.72727e-06	0.001394	5.26316	13
GO:0019838	growth factor binding	GO_MolecularFunction-EBI-UniProt-GOA-ACAP-ARAP_13.05.2021_00h00	4.21148e-06	0.00156667	6.99301	10
GO:0019864	IgG binding	GO_MolecularFunction-EBI-UniProt-GOA-ACAP-ARAP_13.05.2021_00h00	6.57174e-06	0.00238554	33.3333	4
GO:0005161	platelet-derived growth factor receptor binding	GO_MolecularFunction-EBI-UniProt-GOA-ACAP-ARAP_13.05.2021_00h00	1.76578e-05	0.00600366	26.6667	4
GO:0004629	phospholipase C activity	GO_MolecularFunction-EBI-UniProt-GOA-ACAP-ARAP_13.05.2021_00h00	2.40785e-05	0.00792181	8.97436	7
GO:0045236	CXCR chemokine receptor binding	GO_MolecularFunction-EBI-UniProt-GOA-ACAP-ARAP_13.05.2021_00h00	3.85715e-05	0.0122272	22.2222	4
GO:0019955	cytokine binding	GO_MolecularFunction-EBI-UniProt-GOA-ACAP-ARAP_13.05.2021_00h00	4.11292e-05	0.0129557	6.04027	9
GO:0005178	integrin binding	GO_MolecularFunction-EBI-UniProt-GOA-ACAP-ARAP_13.05.2021_00h00	5.59813e-05	0.0166824	5.80645	9
GO:0019865	immunoglobulin binding	GO_MolecularFunction-EBI-UniProt-GOA-ACAP-ARAP_13.05.2021_00h00	0.000150109	0.0387281	16	4
KEGG:04380	Osteoclast differentiation	KEGG_13.05.2021	3.582e-15	1.88413e-12	14.0625	18
KEGG:05323	Rheumatoid arthritis	KEGG_13.05.2021	2.88086e-11	1.38569e-08	13.9785	13
KEGG:05150	Staphylococcus aureus infection	KEGG_13.05.2021	6.42029e-10	2.97902e-07	12.5	12
KEGG:04662	B cell receptor signaling pathway	KEGG_13.05.2021	1.5635e-09	7.14521e-07	13.4146	11
KEGG:04610	Complement and coagulation cascades	KEGG_13.05.2021	2.31456e-09	1.04849e-06	12.9412	11
KEGG:05144	Malaria	KEGG_13.05.2021	3.38159e-09	1.5251e-06	18	9
KEGG:04670	Leukocyte transendothelial migration	KEGG_13.05.2021	4.77269e-09	2.14771e-06	10.5263	12
KEGG:05417	Lipid and atherosclerosis	KEGG_13.05.2021	1.66888e-08	7.3264e-06	6.97674	15
KEGG:05205	Proteoglycans in cancer	KEGG_13.05.2021	6.62734e-08	2.8365e-05	6.82927	14
KEGG:04657	IL-17 signaling pathway	KEGG_13.05.2021	8.5129e-08	3.60947e-05	10.6383	10
KEGG:04514	Cell adhesion molecules	KEGG_13.05.2021	9.7855e-08	4.12948e-05	8.05369	12
KEGG:05146	Amoebiasis	KEGG_13.05.2021	1.85795e-07	7.67335e-05	9.80392	10
KEGG:04613	Neutrophil extracellular trap formation	KEGG_13.05.2021	1.93164e-07	7.95835e-05	6.84211	13
KEGG:05418	Fluid shear stress and atherosclerosis	KEGG_13.05.2021	4.03526e-07	0.000164639	7.91367	11
KEGG:04668	TNF signaling pathway	KEGG_13.05.2021	4.48654e-07	0.000182154	8.92857	10
KEGG:04062	Chemokine signaling pathway	KEGG_13.05.2021	1.50471e-06	0.000588343	6.25	12
KEGG:04933	AGE-RAGE signaling pathway in diabetic complications	KEGG_13.05.2021	1.59621e-06	0.000620927	9	9
KEGG:04060	Cytokine-cytokine receptor interaction	KEGG_13.05.2021	5.22426e-06	0.00192253	4.74576	14
KEGG:05167	Kaposi sarcoma-associated herpesvirus infection	KEGG_13.05.2021	9.98573e-06	0.00354493	5.69948	11
KEGG:05171	Coronavirus disease	KEGG_13.05.2021	1.05554e-05	0.00373661	5.17241	12
KEGG:04061	Viral protein interaction with cytokine and cytokine receptor	KEGG_13.05.2021	1.47048e-05	0.00507316	8	8
KEGG:05133	Pertussis	KEGG_13.05.2021	2.02986e-05	0.00682034	9.21053	7
KEGG:05416	Viral myocarditis	KEGG_13.05.2021	5.03802e-05	0.0153156	10	6
KEGG:00532	Glycosaminoglycan biosynthesis	KEGG_13.05.2021	6.00258e-05	0.0177076	20	4
KEGG:04630	JAK-STAT signaling pathway	KEGG_13.05.2021	7.87927e-05	0.0222983	5.55556	9
KEGG:04926	Relaxin signaling pathway	KEGG_13.05.2021	9.17572e-05	0.025325	6.20155	8
KEGG:04666	Fc gamma R-mediated phagocytosis	KEGG_13.05.2021	9.81646e-05	0.0268971	7.2165	7
KEGG:04064	NF-kappa B signaling pathway	KEGG_13.05.2021	0.000152144	0.0389488	6.73077	7
KEGG:04620	Toll-like receptor signaling pathway	KEGG_13.05.2021	0.000152144	0.0389488	6.73077	7
KEGG:05152	Tuberculosis	KEGG_13.05.2021	0.000175587	0.0438968	5	9
KEGG:05140	Leishmaniasis	KEGG_13.05.2021	0.000204323	0.0492417	7.79221	6
F3	1.23015	8.39083	6.80954	5.55687e-10	2.87219e-08	12.4432
OPN3	-0.885981	8.355	-6.80942	5.56028e-10	2.87219e-08	12.4427
NUP188	0.591221	8.49754	6.80925	5.56479e-10	2.87219e-08	12.4419
C14orf142	-0.649038	8.13331	-6.80049	5.80772e-10	2.99078e-08	12.4005
RNU4-38P	-0.888562	4.80549	-6.79992	5.8237e-10	2.99222e-08	12.3978
TRIM36	-0.952952	6.46115	-6.79447	5.98044e-10	3.05891e-08	12.372
CXCL1	2.81584	10.0966	6.78387	6.29737e-10	3.1994e-08	12.322
ST3GAL2	0.981804	8.05339	6.78206	6.35299e-10	3.22045e-08	12.3135
SLC20A2	-1.08302	8.80003	-6.77967	6.42753e-10	3.25098e-08	12.3022
C8orf4	1.42784	7.42527	6.77873	6.45682e-10	3.25854e-08	12.2978
SENP8	-0.638569	6.65417	-6.7693	6.76028e-10	3.39659e-08	12.2533
G6PC	-0.964691	5.00405	-6.76441	6.92311e-10	3.45808e-08	12.2302
NR6A1	-0.651476	6.60538	-6.76425	6.92835e-10	3.45808e-08	12.2295
SEC22C	0.836709	7.56325	6.75917	7.10159e-10	3.53678e-08	12.2055
NCALD	0.70924	6.50245	6.75578	7.21951e-10	3.58764e-08	12.1896
LRIG2	-0.58894	7.32592	-6.74225	7.71055e-10	3.79799e-08	12.1258
SLC36A1	-1.31587	8.15847	-6.73278	8.07311e-10	3.95984e-08	12.0813
HSD3BP4	-0.821654	6.01332	-6.7278	8.27086e-10	4.04809e-08	12.0578
TMEM37	-1.54579	8.82579	-6.72376	8.43477e-10	4.11059e-08	12.0388
NCKAP5	-0.769197	5.64635	-6.72152	8.52698e-10	4.14663e-08	12.0283
CTSA	-0.621372	10.6769	-6.71013	9.01128e-10	4.36346e-08	11.9747
ZYX	0.828646	9.27365	6.70842	9.08653e-10	4.39053e-08	11.9667
TRIB2	1.5904	7.59925	6.70593	9.19647e-10	4.43422e-08	11.955
C15orf38-AP3S2	-0.716986	9.84772	-6.68825	1.00194e-09	4.80788e-08	11.872
UBE2L6	0.768148	8.19983	6.68768	1.00469e-09	4.80788e-08	11.8693
ZNF429	-1.08019	6.29357	-6.68745	1.00585e-09	4.80788e-08	11.8682
PDZD3	-1.39239	7.04009	-6.68736	1.00625e-09	4.80788e-08	11.8678
PPARG	-1.32171	9.03859	-6.68706	1.00773e-09	4.80788e-08	11.8664
RN7SL541P	-0.726668	5.34242	-6.68644	1.01078e-09	4.81232e-08	11.8635
METTL7A	-1.12898	8.10103	-6.67792	1.05334e-09	4.99403e-08	11.8235
C6orf203	-0.600593	6.65408	-6.67745	1.05572e-09	4.99488e-08	11.8214
FAIM2	0.872994	7.19943	6.67457	1.07056e-09	5.05454e-08	11.8078
SEC13	0.596602	9.31947	6.67413	1.07281e-09	5.05468e-08	11.8058
IL1RN	2.34517	7.9785	6.672	1.08392e-09	5.09647e-08	11.7958
HSDL2	-0.885402	7.86135	-6.6714	1.08711e-09	5.09818e-08	11.793
CYP2R1	-0.626633	7.52206	-6.66633	1.11411e-09	5.20606e-08	11.7692
LIPG	1.13939	8.53513	6.65679	1.16672e-09	5.4194e-08	11.7245
UBE2S	0.635003	7.70767	6.65638	1.16902e-09	5.4194e-08	11.7226
ANXA5	1.28047	10.2346	6.65486	1.17766e-09	5.44697e-08	11.7155
HIST1H3E	-0.815921	6.23519	-6.65352	1.18527e-09	5.47104e-08	11.7092
PLS3	1.03771	7.95869	6.65073	1.20137e-09	5.52288e-08	11.6962
TRIB1	0.841629	9.97525	6.64759	1.21977e-09	5.58488e-08	11.6814
PML	0.773777	7.96471	6.64564	1.23129e-09	5.60524e-08	11.6723
CD81	0.848804	10.9795	6.64298	1.24722e-09	5.65355e-08	11.6599
COTL1	0.649043	9.2586	6.64257	1.24972e-09	5.65362e-08	11.6579
GCOM1	-0.932938	7.24067	-6.63659	1.2863e-09	5.796e-08	11.63
SLC3A1	-1.30695	6.50706	-6.63429	1.30067e-09	5.84915e-08	11.6192
HOXA4	-0.613165	6.00585	-6.62427	1.36515e-09	6.09087e-08	11.5724
HM13	0.681332	9.30615	6.62332	1.37142e-09	6.10684e-08	11.5679
EXOC6B	-0.614022	8.57656	-6.61846	1.404e-09	6.22751e-08	11.5452
SVOPL	-0.594546	5.41237	-6.60369	1.50764e-09	6.64826e-08	11.4762
SLC17A8	-0.604112	5.36331	-6.59492	1.57266e-09	6.86829e-08	11.4353
CLN5	-0.657875	7.94548	-6.59339	1.58432e-09	6.89272e-08	11.4282
ADIRF	-0.746694	7.35404	-6.59241	1.59181e-09	6.90853e-08	11.4236
BTN3A1	0.797955	8.27737	6.57809	1.70545e-09	7.34929e-08	11.3568
NUDT7	-1.00228	7.69631	-6.57381	1.7409e-09	7.48784e-08	11.3369
ACADS	-1.11258	8.85121	-6.56714	1.79768e-09	7.7029e-08	11.3058
CNIH4	-0.591575	9.17104	-6.56009	1.85967e-09	7.92367e-08	11.273
PRKAB2	-0.654978	8.02332	-6.55698	1.88766e-09	8.02786e-08	11.2585
TMEM133	-0.764483	7.63932	-6.55427	1.91246e-09	8.10297e-08	11.2459
SSR1	0.756154	10.526	6.54594	1.99054e-09	8.38306e-08	11.2072
KIAA1107	-0.81493	6.01881	-6.54572	1.99269e-09	8.38306e-08	11.2061
CNGA1	-1.06556	4.93809	-6.54565	1.99333e-09	8.38306e-08	11.2058
SLC41A1	0.9413	7.54874	6.53852	2.06275e-09	8.65899e-08	11.1727
MT1DP	-0.851867	8.79482	-6.53776	2.07032e-09	8.67473e-08	11.1691
P2RX4	-0.982749	8.57468	-6.53634	2.08445e-09	8.71783e-08	11.1625
TMCC3	-0.853075	9.446	-6.53012	2.14766e-09	8.94926e-08	11.1336
MT1JP	-1.02897	7.18032	-6.51967	2.25808e-09	9.3238e-08	11.0851
MXRA5	2.09406	9.02458	6.51667	2.29076e-09	9.4416e-08	11.0712
ADAMTS9	1.70507	7.91166	6.51596	2.2986e-09	9.45674e-08	11.0678
CALU	1.178	8.82036	6.51543	2.3044e-09	9.46345e-08	11.0654
IGSF9	-1.05255	7.83248	-6.51006	2.36455e-09	9.64839e-08	11.0405
SLC9A3R1	-0.914524	10.1274	-6.50989	2.36643e-09	9.64839e-08	11.0397
SLC28A3	1.3461	7.37581	6.50668	2.40309e-09	9.77739e-08	11.0248
MCOLN2	-1.6762	7.60695	-6.50637	2.40667e-09	9.77739e-08	11.0234
GAREM	-0.677831	8.36718	-6.50527	2.41948e-09	9.79436e-08	11.0182
SEMA5A	-1.23541	8.66854	-6.50478	2.42514e-09	9.79983e-08	11.016
RAC2	1.37481	9.66382	6.50189	2.45894e-09	9.91876e-08	11.0026
DAPK2	-0.71371	8.23149	-6.48162	2.70949e-09	1.08141e-07	10.9087
GLB1L2	-1.07805	8.17497	-6.48069	2.72157e-09	1.08322e-07	10.9043
ANKH	-0.840865	8.5567	-6.48038	2.72564e-09	1.08322e-07	10.9029
UGDH	-0.927007	10.8734	-6.47765	2.76146e-09	1.09446e-07	10.8903
C11orf53	-0.756246	5.7584	-6.4711	2.8493e-09	1.1234e-07	10.86
MRPL34	-0.610148	7.92131	-6.46945	2.87188e-09	1.12838e-07	10.8523
ANKDD1B	-0.766172	5.51228	-6.46448	2.94092e-09	1.15351e-07	10.8293
AGRN	0.639141	8.35546	6.46367	2.95233e-09	1.15599e-07	10.8256
GDE1	-0.627029	8.65898	-6.45412	3.09016e-09	1.19961e-07	10.7814
KCND3	1.63516	7.40427	6.45352	3.09911e-09	1.20104e-07	10.7786
ASRGL1	0.962296	8.1565	6.4491	3.16516e-09	1.22048e-07	10.7582
TPRG1L	-0.710696	9.15928	-6.44906	3.16577e-09	1.22048e-07	10.758
CCDC112	-0.746313	5.89253	-6.44873	3.17077e-09	1.22048e-07	10.7565
CFB	1.87428	9.81776	6.44212	3.27242e-09	1.25323e-07	10.726
LOC642947	-0.806619	5.67954	-6.43933	3.31633e-09	1.26791e-07	10.7131
SSTR1	-0.72329	7.44283	-6.43841	3.33089e-09	1.27134e-07	10.7088
VTRNA1-3	0.90397	6.43381	6.43677	3.35705e-09	1.27917e-07	10.7012
PPARGC1A	-1.92031	7.72935	-6.43014	3.4649e-09	1.31805e-07	10.6707
HMGA2	-0.68279	6.47958	-6.429	3.48389e-09	1.32306e-07	10.6654
ARNTL2	1.48588	7.51188	6.42701	3.5171e-09	1.32901e-07	10.6562
SULT1A2	-1.65975	7.92119	-6.42149	3.61087e-09	1.35766e-07	10.6307
ZC3H12A	1.22878	9.05541	6.42024	3.63244e-09	1.36352e-07	10.625
AFG3L2	-0.734243	8.48802	-6.41906	3.6528e-09	1.3673e-07	10.6195
MSTO1	0.619837	7.8523	6.4118	3.78149e-09	1.41014e-07	10.586
SYVN1	0.590537	9.39211	6.41002	3.81362e-09	1.418e-07	10.5779
ANO10	-0.770956	9.1264	-6.40994	3.81504e-09	1.418e-07	10.5775
CARD6	1.3629	6.04238	6.40737	3.86206e-09	1.43079e-07	10.5656
UGP2	-1.01762	9.71261	-6.4068	3.87258e-09	1.43235e-07	10.563
LRP8	1.12617	8.18153	6.40567	3.8934e-09	1.43771e-07	10.5578
ZFPM2	0.848475	6.8788	6.40056	3.98945e-09	1.46603e-07	10.5342
SNORD3B-1	1.32627	10.3668	6.39886	4.02183e-09	1.47554e-07	10.5264
ACAA2	-0.937743	8.85891	-6.3982	4.03444e-09	1.47778e-07	10.5234
NCOA7	1.01999	7.65272	6.39406	4.11475e-09	1.50062e-07	10.5043
LIAS	-0.704318	6.4084	-6.39236	4.14818e-09	1.5097e-07	10.4965
SLC9A7	0.943193	7.13221	6.39132	4.16879e-09	1.51477e-07	10.4917
MYC	0.656778	8.36929	6.38452	4.30576e-09	1.56204e-07	10.4604
UGT1A1	-1.36336	7.22401	-6.38315	4.33397e-09	1.56977e-07	10.4541
BPHL	-0.72783	7.08733	-6.38134	4.37134e-09	1.58078e-07	10.4458
STX3	-0.740648	8.66366	-6.37626	4.47819e-09	1.61428e-07	10.4224
SLC26A2	-3.64442	9.07192	-6.37138	4.58334e-09	1.64696e-07	10.4
ZHX2	0.696195	8.09876	6.37064	4.59947e-09	1.65014e-07	10.3966
CXorf23	-0.748471	6.5245	-6.36913	4.63256e-09	1.65939e-07	10.3897
MYO1D	-1.03258	10.226	-6.36675	4.68523e-09	1.67562e-07	10.3787
MTCL1	0.627102	6.80973	6.36193	4.79372e-09	1.71172e-07	10.3566
CEBPD	0.693959	9.43067	6.35936	4.85249e-09	1.72998e-07	10.3448
FUT8	1.2105	8.87621	6.35846	4.87331e-09	1.73469e-07	10.3407
FGFR3	-1.00354	7.75516	-6.35791	4.8861e-09	1.73652e-07	10.3381
PLK2	1.05359	7.28179	6.34856	5.10771e-09	1.81244e-07	10.2952
LMTK2	-0.662474	9.04745	-6.34699	5.14595e-09	1.82316e-07	10.288
FASTKD1	-0.796552	7.3174	-6.34587	5.17319e-09	1.82711e-07	10.2829
TMEM220	-0.948162	6.76553	-6.34528	5.18775e-09	1.82936e-07	10.2802
MT1M	-2.39381	8.65314	-6.34496	5.19568e-09	1.82936e-07	10.2787
MIR215	-1.88001	4.8645	-6.34022	5.31389e-09	1.86261e-07	10.2569
TINAG	-1.54283	6.69294	-6.34018	5.31472e-09	1.86261e-07	10.2568
PECR	-0.882182	6.98029	-6.3319	5.52763e-09	1.93424e-07	10.2188
ACOT8	-0.736496	8.22139	-6.33071	5.55881e-09	1.94216e-07	10.2134
CYP4X1	1.24117	6.7073	6.32968	5.58598e-09	1.94866e-07	10.2086
ZCCHC14	-0.744319	7.63113	-6.327	5.65744e-09	1.96754e-07	10.1963
SCO1	-0.611018	8.24357	-6.3227	5.77384e-09	2.00495e-07	10.1766
PHF7	-0.698897	6.57968	-6.32171	5.80101e-09	2.00991e-07	10.1721
CLYBL	-1.15094	7.41502	-6.32153	5.80582e-09	2.00991e-07	10.1713
RMRP	0.666946	11.7848	6.31869	5.88442e-09	2.03402e-07	10.1583
SLC41A2	-0.786201	9.43837	-6.30975	6.13873e-09	2.11228e-07	10.1174
AKAP9	-0.735749	8.15204	-6.3093	6.15199e-09	2.11364e-07	10.1153
PTPN13	1.21485	6.6876	6.30858	6.17294e-09	2.11763e-07	10.112
OSMR	2.39707	8.37105	6.30508	6.27608e-09	2.14331e-07	10.096
IFITM1	1.16068	10.3348	6.30354	6.32194e-09	2.15572e-07	10.0889
TMEM170A	-0.886129	9.94048	-6.30134	6.38795e-09	2.17483e-07	10.0789
TAP1	0.987341	10.6129	6.30104	6.39712e-09	2.17483e-07	10.0775
HEG1	1.54217	7.99116	6.30028	6.42021e-09	2.17941e-07	10.074
CLSTN3	0.788945	7.44838	6.2961	6.54828e-09	2.21297e-07	10.0549
LPIN1	0.94334	8.60157	6.28989	6.74318e-09	2.26024e-07	10.0266
CD34	1.38181	8.1868	6.28874	6.78014e-09	2.26437e-07	10.0213
CXCL3	1.08769	7.44182	6.28802	6.80326e-09	2.26875e-07	10.018
RNVU1-15	1.05267	7.33051	6.28521	6.89397e-09	2.29227e-07	10.0052
IRAK3	1.96397	7.6422	6.28093	7.03484e-09	2.33569e-07	9.98563
PDZK1	-0.958894	4.939	-6.2797	7.07582e-09	2.34587e-07	9.98001
HSD17B11	-0.939816	10.5736	-6.27573	7.20972e-09	2.38677e-07	9.96188
ETFA	-0.615262	9.62824	-6.26288	7.66066e-09	2.53083e-07	9.90323
MAPKAPK2	0.599245	9.3642	6.2627	7.66715e-09	2.53083e-07	9.90241
RNU6-377P	-0.797159	6.45314	-6.25845	7.82222e-09	2.57453e-07	9.88305
IFITM2	1.32049	8.82661	6.24911	8.17447e-09	2.67873e-07	9.84047
PECAM1	1.98107	9.84641	6.24881	8.18599e-09	2.67873e-07	9.83911
LOC100131796	-0.588006	4.97276	-6.2439	8.37754e-09	2.73354e-07	9.81675
SERPINB5	2.89149	8.54743	6.23697	8.65531e-09	2.82012e-07	9.78521
HYKK	-0.628364	6.82736	-6.23479	8.74463e-09	2.84107e-07	9.77529
PRAP1	-0.751267	7.82371	-6.23303	8.81744e-09	2.85655e-07	9.76727
ZNF137P	-0.605544	5.19106	-6.23045	8.92519e-09	2.88734e-07	9.75553
FXYD5	1.05652	8.54867	6.22902	8.98542e-09	2.90269e-07	9.74903
MT1A	-1.04572	8.99765	-6.22223	9.27708e-09	2.98841e-07	9.71816
PSME2	0.764268	9.65117	6.22125	9.32009e-09	2.99801e-07	9.71368
TRIM29	1.50855	8.17517	6.22075	9.34194e-09	3.00079e-07	9.71142
MIF	0.6745	9.76374	6.20613	1.00068e-08	3.19627e-07	9.64497
ALCAM	0.67095	8.71555	6.20187	1.02089e-08	3.25625e-07	9.62564
ACVR1C	-1.30834	7.85756	-6.20009	1.02949e-08	3.27907e-07	9.61754
GRB10	0.772063	7.54242	6.19356	1.06153e-08	3.37167e-07	9.58792
TMEM39A	0.583566	8.69566	6.18325	1.11418e-08	3.5143e-07	9.54114
IFI35	0.724579	8.4764	6.18089	1.12654e-08	3.53856e-07	9.53047
ZNF480	-0.681657	8.53227	-6.17889	1.1372e-08	3.56709e-07	9.52138
PSMB9	1.05676	8.82271	6.17827	1.14048e-08	3.57247e-07	9.51859
FSIP2	-1.55634	5.93964	-6.17484	1.15896e-08	3.61324e-07	9.50306
ZDHHC23	-0.895008	8.33564	-6.17468	1.15986e-08	3.61324e-07	9.50231
IGKV1OR9-1	1.41279	9.25617	6.16525	1.21225e-08	3.76187e-07	9.45962
MT1P3	-1.08364	8.12489	-6.1652	1.21255e-08	3.76187e-07	9.45939
PIM3	0.588201	7.88127	6.15937	1.2461e-08	3.84497e-07	9.43301
NHEJ1	-0.879099	7.48101	-6.15561	1.26826e-08	3.90803e-07	9.41598
CD160	-0.730393	4.97664	-6.15126	1.29434e-08	3.98299e-07	9.39631
APOL1	1.94209	8.71637	6.14964	1.3042e-08	4.00791e-07	9.38898
RGS2	1.72372	8.21989	6.14623	1.32518e-08	4.05592e-07	9.37356
CDKL1	-0.729626	6.15451	-6.14468	1.33479e-08	4.07983e-07	9.36658
FOS	1.97523	9.65731	6.14088	1.35874e-08	4.13632e-07	9.3494
SPPL2A	-0.663384	10.7588	-6.13936	1.36845e-08	4.16031e-07	9.34252
MCFD2	0.745904	8.44914	6.1368	1.38494e-08	4.1992e-07	9.33094
CNNM2	-1.10228	7.92198	-6.13506	1.39625e-08	4.22221e-07	9.32309
MT1G	-1.64357	11.2648	-6.1332	1.40844e-08	4.24236e-07	9.31469
MMP14	0.996452	8.77515	6.12689	1.4506e-08	4.36332e-07	9.2862
ABAT	-0.868859	7.43305	-6.12296	1.47746e-08	4.43239e-07	9.26847
KLHL8	-0.739882	7.05256	-6.12165	1.48651e-08	4.45364e-07	9.26257
MT1F	-1.70052	10.8331	-6.11998	1.49818e-08	4.48271e-07	9.25502
SEC14L1	0.993572	8.45797	6.11915	1.50398e-08	4.49414e-07	9.25128
SDC3	0.657249	7.60842	6.11804	1.51177e-08	4.51146e-07	9.2463
FYN	1.23309	7.67963	6.1169	1.51986e-08	4.52967e-07	9.24114
GXYLT2	-1.41507	6.64022	-6.10919	1.5756e-08	4.68443e-07	9.20635
PRDX6	-1.0629	9.56896	-6.10599	1.59923e-08	4.74212e-07	9.19197
PANK3	-0.653016	9.42261	-6.10596	1.5995e-08	4.74212e-07	9.19181
ITGA5	1.93179	8.88252	6.10538	1.60384e-08	4.74726e-07	9.18919
PLD1	-0.651422	8.48049	-6.10517	1.60542e-08	4.74726e-07	9.18824
PTPRR	-1.46472	7.16463	-6.10057	1.64018e-08	4.83746e-07	9.16755
PHOSPHO2	-0.636005	6.26256	-6.10003	1.64438e-08	4.84356e-07	9.16508
CCDC183	-0.699365	6.47193	-6.09798	1.66013e-08	4.88361e-07	9.15587
FZD3	0.750449	6.67885	6.09739	1.6647e-08	4.88443e-07	9.15321
PGRMC1	-0.580464	10.4527	-6.09739	1.66471e-08	4.88443e-07	9.15321
IGKV1OR9-2	1.52976	9.85233	6.09491	1.68407e-08	4.92851e-07	9.14204
LETM1	-0.687136	8.96265	-6.09345	1.69554e-08	4.95568e-07	9.13549
ATP8A1	-0.811587	8.32603	-6.09112	1.71409e-08	4.99706e-07	9.12497
CCDC89	-0.619332	5.61249	-6.08863	1.73409e-08	5.0424e-07	9.11377
SLC16A9	-2.02522	7.17229	-6.08763	1.74219e-08	5.05949e-07	9.10927
ETS2	0.602342	10.9218	6.08341	1.77676e-08	5.14247e-07	9.09029
C2orf88	-1.01655	7.7947	-6.08284	1.78147e-08	5.14723e-07	9.08774
MIR194-1	-1.55984	4.95814	-6.079	1.81367e-08	5.2336e-07	9.07044
KCNG3	-0.604059	6.63595	-6.07016	1.88979e-08	5.42688e-07	9.03074
ZNF383	-0.618781	7.05924	-6.07012	1.89021e-08	5.42688e-07	9.03052
ELL2P1	1.27871	7.80964	6.06943	1.89624e-08	5.43733e-07	9.02744
SPCS3	0.916668	9.54832	6.06747	1.91359e-08	5.48014e-07	9.01865
SESTD1	0.77887	7.49405	6.06255	1.95795e-08	5.59308e-07	8.99652
CCL20	1.95156	8.47815	6.06128	1.96949e-08	5.61194e-07	8.99084
RNF152	-1.45036	8.02334	-6.06011	1.98028e-08	5.63561e-07	8.98557
ENTPD5	-1.80565	8.88892	-6.05936	1.98716e-08	5.64811e-07	8.98222
ZNF768	-0.636316	7.52835	-6.05868	1.99346e-08	5.65894e-07	8.97916
ACOT13	-0.872867	9.79026	-6.05513	2.02665e-08	5.74204e-07	8.96322
SLC44A1	-0.810644	10.4176	-6.05501	2.02779e-08	5.74204e-07	8.96267
PDIA4	0.818736	10.7014	6.05271	2.04954e-08	5.7964e-07	8.95237
TMEM209	-0.691896	8.82713	-6.04887	2.08647e-08	5.88617e-07	8.93513
BTN3A3	0.800475	7.81377	6.04818	2.09321e-08	5.89785e-07	8.93202
CELSR1	0.600038	7.34318	6.04728	2.10191e-08	5.91503e-07	8.92801
TMCO1	-0.741155	9.98268	-6.04219	2.15221e-08	6.04162e-07	8.90517
DUSP4	1.10421	6.71893	6.04062	2.16792e-08	6.07593e-07	8.89815
ACTN1	0.626972	10.7607	6.04044	2.16978e-08	6.07593e-07	8.89732
RAB4A	-0.737721	7.62291	-6.04015	2.17271e-08	6.07662e-07	8.89602
CHKA	-0.785881	8.29977	-6.0381	2.19344e-08	6.11953e-07	8.88685
DRAM1	1.5291	7.9323	6.0376	2.19857e-08	6.12632e-07	8.8846
ELK3	1.12662	8.09201	6.03697	2.20503e-08	6.13465e-07	8.88177
STRADB	-1.03117	9.47894	-6.03109	2.26604e-08	6.2835e-07	8.85541
PARK2	-0.757011	6.27607	-6.02836	2.29485e-08	6.34015e-07	8.84322
TRPM6	-2.47066	7.62444	-6.02705	2.30888e-08	6.37116e-07	8.83733
CD276	0.603106	8.64925	6.02454	2.33592e-08	6.43795e-07	8.82609
CTNNAL1	0.668268	7.13828	6.02361	2.34603e-08	6.45797e-07	8.82192
NDUFS1	-0.609391	9.18431	-6.02306	2.35194e-08	6.46642e-07	8.81949
TMEM38B	-1.03399	6.94386	-6.02228	2.36051e-08	6.47429e-07	8.81598
MT1HL1	-0.635455	7.99324	-6.01973	2.38857e-08	6.54335e-07	8.80457
HIGD1AP1	-0.876954	9.66943	-6.0141	2.4517e-08	6.70014e-07	8.77939
TGFA	-0.69609	7.09329	-6.01255	2.46945e-08	6.73243e-07	8.77243
SRI	-0.932805	10.8915	-6.01155	2.48091e-08	6.75558e-07	8.76795
SLC14A2	-0.951122	5.76654	-6.00984	2.50057e-08	6.79891e-07	8.76034
LOC100133315	-0.656061	6.81723	-6.00965	2.50281e-08	6.79891e-07	8.75947
MAGED1	0.5881	9.51352	6.0057	2.54901e-08	6.90788e-07	8.74181
PFKFB3	1.73839	9.161	6.00039	2.61248e-08	7.06304e-07	8.71807
DYRK2	-0.68609	9.7116	-5.99249	2.70977e-08	7.30866e-07	8.68278
LRP6	-0.649347	8.18025	-5.99005	2.74048e-08	7.37398e-07	8.6719
SOCS3	2.06438	8.59069	5.98606	2.79156e-08	7.48481e-07	8.65408
PADI2	-2.50432	9.36915	-5.98549	2.79895e-08	7.49576e-07	8.65153
TMEM171	-1.37094	8.621	-5.98412	2.81668e-08	7.53437e-07	8.64543
DHRS11	-1.93602	9.54796	-5.98265	2.83587e-08	7.5723e-07	8.63888
WARS	1.77983	9.95612	5.9774	2.9055e-08	7.74459e-07	8.61547
HLA-DPA1	1.4428	11.5661	5.97632	2.92013e-08	7.76532e-07	8.61062
ZNF415	-0.725423	5.67096	-5.97606	2.92354e-08	7.76532e-07	8.60949
RNF14	-0.580984	9.38869	-5.97487	2.93966e-08	7.79904e-07	8.60418
HIBCH	-0.865332	7.50268	-5.97066	2.99747e-08	7.94268e-07	8.58539
MATN2	-0.828831	7.84797	-5.97037	3.00147e-08	7.94268e-07	8.58411
SP110	1.05526	7.87005	5.97014	3.00457e-08	7.94268e-07	8.58311
PIK3R3	1.01731	8.16473	5.96397	3.09144e-08	8.14463e-07	8.5556
MTHFD2P7	0.729516	7.59338	5.95719	3.18972e-08	8.38408e-07	8.5254
C3	2.14997	9.68781	5.95155	3.27383e-08	8.58529e-07	8.50028
SLC10A5	-1.76427	7.61351	-5.94682	3.34593e-08	8.75415e-07	8.47926
CRYL1	-0.884129	8.41845	-5.94654	3.35023e-08	8.75533e-07	8.47802
EGR1	1.64473	9.96326	5.946	3.35857e-08	8.76507e-07	8.47563
DEFB1	-0.837972	5.11067	-5.94414	3.38748e-08	8.82222e-07	8.46735
PRSS22	0.688822	7.55729	5.94266	3.41069e-08	8.87249e-07	8.46076
FRRS1	-1.02527	8.04273	-5.93983	3.45559e-08	8.97899e-07	8.44815
LOC102725070	-1.2848	5.74947	-5.93846	3.47731e-08	9.01482e-07	8.4421
MPND	-0.726939	7.8797	-5.93089	3.6008e-08	9.30112e-07	8.40843
CXCL2	1.92115	7.79718	5.93037	3.6094e-08	9.30413e-07	8.40613
ABCA12	2.97559	7.52539	5.92518	3.69658e-08	9.50728e-07	8.3831
MTHFD2	0.833001	8.91675	5.9238	3.72023e-08	9.55729e-07	8.37695
HRSP12	-0.80062	7.55654	-5.92313	3.73172e-08	9.56517e-07	8.37397
HMOX1	-0.768364	8.05672	-5.92041	3.7786e-08	9.66352e-07	8.36193
IDO1	3.41393	7.88309	5.90771	4.0059e-08	1.01761e-06	8.30558
FBXL20	-0.592263	7.90282	-5.90546	4.04751e-08	1.02683e-06	8.29561
ELL2	1.01555	8.73918	5.90526	4.05127e-08	1.02683e-06	8.29471
NOS2	2.75843	10.1577	5.90079	4.13532e-08	1.04697e-06	8.2749
RAB17	-0.706084	7.2801	-5.8993	4.16372e-08	1.05299e-06	8.2683
VSIG10	-0.948755	7.85181	-5.89602	4.22689e-08	1.06659e-06	8.25378
PLVAP	1.05279	9.00665	5.89529	4.24116e-08	1.06823e-06	8.25053
CHPT1	-0.881829	9.59122	-5.8952	4.24283e-08	1.06823e-06	8.25014
SELM	0.867457	8.90723	5.89265	4.29285e-08	1.07963e-06	8.23884
KYNU	2.8032	7.44405	5.88578	4.43031e-08	1.11051e-06	8.20844
DENND4C	-0.620413	9.09608	-5.88356	4.47576e-08	1.11943e-06	8.19859
PLA2R1	-0.854395	6.90111	-5.8824	4.49965e-08	1.12394e-06	8.19346
CHP1	-0.645054	11.8407	-5.8822	4.50369e-08	1.12394e-06	8.19259
EPHA2	1.18158	8.93929	5.88072	4.53428e-08	1.13033e-06	8.18607
IL1B	3.04211	8.68423	5.87862	4.57826e-08	1.14005e-06	8.17675
PCSK1	1.79938	7.41907	5.87794	4.59258e-08	1.14236e-06	8.17374
UBD	1.82391	7.2919	5.87538	4.64672e-08	1.15204e-06	8.16244
SLFN13	0.693418	7.11838	5.87263	4.70574e-08	1.1654e-06	8.15027
SMPDL3B	-0.694799	8.61678	-5.87227	4.71336e-08	1.16549e-06	8.14871
CDH5	1.42202	8.30802	5.87074	4.74654e-08	1.1704e-06	8.14194
PDCD4	-1.24075	9.43283	-5.86787	4.80949e-08	1.18207e-06	8.12923
MLKL	1.04863	7.95251	5.86732	4.82159e-08	1.18358e-06	8.12681
HIF1A	1.144	11.0093	5.86633	4.84353e-08	1.18659e-06	8.12243
APLNR	1.11635	7.77346	5.8649	4.87528e-08	1.19308e-06	8.11613
SCIN	-1.59705	7.54055	-5.8626	4.92687e-08	1.20182e-06	8.10598
VWF	1.68889	7.87217	5.8609	4.96555e-08	1.20908e-06	8.09844
CTSH	1.20864	9.0325	5.86082	4.96728e-08	1.20908e-06	8.0981
PDZK1IP1	1.62195	10.281	5.85962	4.99457e-08	1.21442e-06	8.09282
PANK1	-0.778526	7.85868	-5.8592	5.00417e-08	1.21545e-06	8.09097
NFKBIZ	1.14543	9.29568	5.84696	5.29261e-08	1.2814e-06	8.03693
DUSP7	0.765503	9.60074	5.84661	5.30106e-08	1.28155e-06	8.03539
SAMD13	-1.19478	6.44791	-5.84647	5.30452e-08	1.28155e-06	8.03476
SLC7A5	1.50046	8.29733	5.84534	5.33193e-08	1.2868e-06	8.02979
MARVELD3	-0.879375	8.23153	-5.84368	5.37258e-08	1.29427e-06	8.02247
ANK3	-0.888478	7.22955	-5.84333	5.38123e-08	1.29457e-06	8.02092
IGHV4-59	2.08689	12.0508	5.83887	5.49208e-08	1.31984e-06	8.00126
LPHN2	1.64354	7.96955	5.8361	5.56205e-08	1.33364e-06	7.98905
KIAA0195	-0.615577	8.6952	-5.83589	5.56736e-08	1.33364e-06	7.98813
ZNF577	-0.644658	6.44946	-5.83556	5.57573e-08	1.33364e-06	7.98668
KIRREL	0.987975	7.45031	5.83079	5.6986e-08	1.36082e-06	7.96566
SDR16C5	1.21692	6.63575	5.82975	5.72556e-08	1.3644e-06	7.96111
RNF122	0.795992	7.15706	5.82868	5.75371e-08	1.36967e-06	7.95639
LRRN2	-0.898238	6.78967	-5.82771	5.77918e-08	1.37429e-06	7.95213
TMEM204	0.835573	8.31177	5.82454	5.86353e-08	1.39006e-06	7.93816
C9orf85	-0.602995	7.11439	-5.82453	5.86385e-08	1.39006e-06	7.9381
PAPLN	0.648545	7.30332	5.82108	5.95681e-08	1.40623e-06	7.92294
AGMAT	-0.788944	8.43313	-5.81686	6.07254e-08	1.43206e-06	7.90439
GRAMD4	-0.746419	8.62984	-5.8155	6.11046e-08	1.43724e-06	7.89839
PGM3	0.762796	8.23431	5.81095	6.23866e-08	1.46161e-06	7.87837
TMEM165	0.654398	10.0998	5.81059	6.24898e-08	1.46161e-06	7.87678
LIMS1	0.621871	8.98296	5.81057	6.24935e-08	1.46161e-06	7.87672
PGAP3	-0.827194	8.08787	-5.80775	6.33023e-08	1.47597e-06	7.86433
EYA2	-0.775865	6.8383	-5.80743	6.33955e-08	1.47663e-06	7.86291
MTM1	-0.959956	7.77599	-5.80356	6.45236e-08	1.49983e-06	7.8459
SLC38A5	0.861908	7.52856	5.80213	6.4945e-08	1.50808e-06	7.83963
SOCS1	0.960138	8.06602	5.79837	6.60683e-08	1.53103e-06	7.8231
MTMR11	-1.19503	8.78485	-5.79749	6.63315e-08	1.534e-06	7.81927
AHR	0.780959	9.95213	5.79663	6.65924e-08	1.5369e-06	7.81548
FSTL1	1.63131	9.32209	5.79578	6.68512e-08	1.54131e-06	7.81174
MT1E	-0.926836	9.6097	-5.79295	6.77172e-08	1.55811e-06	7.79934
LEF1	1.17277	7.06353	5.79233	6.7911e-08	1.56099e-06	7.79658
IGKV3D-11	2.45892	11.089	5.79066	6.84293e-08	1.56656e-06	7.78925
MT1X	-1.15266	9.22306	-5.78939	6.88254e-08	1.57404e-06	7.78369
PDP1	0.863847	9.70758	5.76818	7.57955e-08	1.72132e-06	7.69072
HAVCR1	-1.7227	6.07743	-5.76637	7.64199e-08	1.73376e-06	7.68281
RNA5SP356	-0.711595	6.76332	-5.7661	7.6516e-08	1.73421e-06	7.6816
C5orf63	-0.795729	7.22972	-5.76394	7.72713e-08	1.74784e-06	7.67214
CHN2	-1.01905	8.10194	-5.76302	7.75934e-08	1.75338e-06	7.66813
ATP1B3	-0.791217	9.6236	-5.75334	8.10793e-08	1.82851e-06	7.62578
MSN	1.49298	9.77576	5.75062	8.20854e-08	1.84753e-06	7.6139
ZNF91	-1.05212	8.99373	-5.74983	8.23818e-08	1.85054e-06	7.61042
SH3PXD2B	0.931632	8.00016	5.74952	8.24981e-08	1.85132e-06	7.60906
FAM57A	0.72328	8.82967	5.74636	8.36879e-08	1.87246e-06	7.59527
CRAT	-0.745076	8.83443	-5.74611	8.37826e-08	1.87246e-06	7.59418
SDHB	-0.598251	9.55583	-5.74593	8.38528e-08	1.87246e-06	7.59337
ATP2B1	-0.606307	9.17007	-5.74175	8.5457e-08	1.9019e-06	7.57511
ST3GAL1	1.52607	8.08146	5.74162	8.55058e-08	1.9019e-06	7.57456
TAP2	0.835035	8.73052	5.73912	8.64818e-08	1.91985e-06	7.56362
GABRP	1.289	7.28931	5.73876	8.66238e-08	1.92112e-06	7.56204
DUOXA2	3.44451	9.80842	5.73838	8.67721e-08	1.92253e-06	7.5604
ZNF763	-0.65424	6.13158	-5.73746	8.71346e-08	1.9268e-06	7.55638
SUCLG2P2	-0.611895	6.77105	-5.73253	8.91022e-08	1.96267e-06	7.53487
KCNE3	0.856983	7.44966	5.7323	8.91943e-08	1.96279e-06	7.53387
HID1	0.580293	8.90239	5.73137	8.95714e-08	1.96918e-06	7.52981
NRIP1	-0.666382	9.39726	-5.72839	9.07886e-08	1.99209e-06	7.5168
SLCO4A1	1.13038	7.92644	5.72817	9.08812e-08	1.99219e-06	7.51582
PDE4B	1.19353	6.84204	5.72518	9.21213e-08	2.01549e-06	7.50276
RAB11FIP1	-0.751734	8.63096	-5.72441	9.24419e-08	2.02055e-06	7.49941
IL6R	-0.586484	8.43969	-5.72303	9.30206e-08	2.03125e-06	7.4934
RN7SL706P	-0.853516	5.11867	-5.72204	9.34403e-08	2.03845e-06	7.48907
USP2	-1.24996	7.78192	-5.71482	9.65428e-08	2.09607e-06	7.4576
GBA2	-0.607667	9.25193	-5.7123	9.76502e-08	2.11606e-06	7.44661
PRDM1	1.57148	9.37618	5.71048	9.84563e-08	2.12947e-06	7.43869
IER2	0.642717	8.40368	5.70635	1.0031e-07	2.15928e-06	7.42072
JAK2	0.852123	8.2762	5.70312	1.01786e-07	2.1869e-06	7.40666
DUOX2	3.53846	11.1393	5.70273	1.01965e-07	2.18868e-06	7.40497
GOLIM4	-0.609024	10.3947	-5.69717	1.0456e-07	2.24014e-06	7.38076
TMIGD1	-3.06534	7.52919	-5.69289	1.06598e-07	2.27737e-06	7.36216
GPRC5B	0.90712	7.93347	5.69118	1.07427e-07	2.29292e-06	7.3547
ADAMTS1	1.48418	7.39414	5.69069	1.07663e-07	2.29364e-06	7.35259
RHOB	0.689161	9.2371	5.68349	1.11219e-07	2.35615e-06	7.32129
ZADH2	-0.691231	8.26817	-5.68253	1.11704e-07	2.36201e-06	7.3171
LAMC1	1.32867	8.46646	5.68089	1.12533e-07	2.3729e-06	7.30999
FLJ38379	-0.968873	5.80498	-5.67972	1.13126e-07	2.3832e-06	7.30492
GARS	0.597098	9.78406	5.67667	1.14694e-07	2.4115e-06	7.29166
MAB21L3	-1.27344	7.05307	-5.67649	1.14788e-07	2.4115e-06	7.29088
TSPAN7	-1.32977	9.84319	-5.67494	1.15592e-07	2.4239e-06	7.28416
CRELD2	0.74687	8.03959	5.67346	1.16367e-07	2.43567e-06	7.27772
OCRL	-0.61832	8.2015	-5.67003	1.18178e-07	2.46903e-06	7.26284
STAT1	1.07754	10.5227	5.66962	1.18399e-07	2.46958e-06	7.26104
LDHB	0.717259	9.32238	5.66957	1.18422e-07	2.46958e-06	7.26086
LANCL3	-0.823896	5.99986	-5.66841	1.19043e-07	2.47938e-06	7.25583
NUAK2	-0.722363	7.97613	-5.6666	1.20022e-07	2.49607e-06	7.24794
PLK3	0.923947	7.6738	5.65682	1.25425e-07	2.59418e-06	7.20554
SERPING1	1.57674	8.97698	5.6565	1.25607e-07	2.59418e-06	7.20414
NIPAL1	-1.17726	8.67861	-5.65585	1.25973e-07	2.59842e-06	7.20134
SMPDL3A	-1.14725	9.43581	-5.65226	1.28027e-07	2.63122e-06	7.18577
PLXNA2	-0.799684	8.03335	-5.65177	1.28308e-07	2.63461e-06	7.18366
SELENBP1	-1.63465	10.755	-5.64982	1.29439e-07	2.65543e-06	7.17521
PTRF	0.927905	7.60324	5.64311	1.334e-07	2.71873e-06	7.14618
ADCY9	-0.584619	8.01738	-5.64298	1.33483e-07	2.71873e-06	7.14559
COQ5	-0.602561	7.94053	-5.6387	1.36076e-07	2.76732e-06	7.12706
SLC12A4	0.676051	7.5152	5.6363	1.37551e-07	2.79409e-06	7.11668
NR1I2	-0.890188	7.08192	-5.63465	1.38573e-07	2.80982e-06	7.10956
TUBA1A	0.846846	8.63686	5.63168	1.40434e-07	2.84247e-06	7.09672
IER3	1.04299	9.79211	5.6267	1.43612e-07	2.89905e-06	7.07517
ATP10D	0.62248	7.48597	5.62509	1.44653e-07	2.91488e-06	7.06822
NXPE2	-1.51374	7.22397	-5.62113	1.47247e-07	2.96451e-06	7.05112
PTPN21	-0.67858	7.56516	-5.61943	1.48371e-07	2.97777e-06	7.04379
SPARC	1.53931	10.7199	5.61935	1.48428e-07	2.97777e-06	7.04342
NAT2	-1.13579	6.6475	-5.61934	1.4843e-07	2.97777e-06	7.04341
GIMAP4	1.23897	6.91357	5.61755	1.49631e-07	2.99476e-06	7.03565
PCSK5	-1.17547	8.41011	-5.61749	1.49672e-07	2.99476e-06	7.03539
RETSAT	-0.95512	10.1433	-5.61722	1.49854e-07	2.99576e-06	7.03422
XPNPEP2	-1.38697	6.95322	-5.61515	1.51247e-07	3.02096e-06	7.02531
CA12	-0.907153	11.125	-5.61293	1.52765e-07	3.0459e-06	7.0157
LYN	1.19278	9.69523	5.61084	1.54202e-07	3.07187e-06	7.00669
HOXB5	-0.952223	7.19335	-5.61049	1.54443e-07	3.07398e-06	7.00518
GLTP	-0.611199	8.52384	-5.60839	1.55906e-07	3.09495e-06	6.99611
ACACB	-0.709746	7.30541	-5.60659	1.57164e-07	3.11719e-06	6.98838
ATP1B3P1	-0.615335	6.76943	-5.6049	1.58364e-07	3.13825e-06	6.98106
TSPAN18	0.846068	7.29811	5.60252	1.6006e-07	3.16911e-06	6.9708
BCL3	0.587814	9.87289	5.59986	1.61976e-07	3.20424e-06	6.95935
ADAL	-0.663878	6.52514	-5.59686	1.64164e-07	3.24471e-06	6.94643
MFNG	0.765157	7.22072	5.59496	1.65568e-07	3.26961e-06	6.93824
CHP2	-2.29299	7.97997	-5.59308	1.66972e-07	3.28875e-06	6.93012
MT1IP	-0.650267	6.9723	-5.59143	1.68208e-07	3.30737e-06	6.92301
MIR8071-1	1.8696	9.98898	5.5907	1.68755e-07	3.31525e-06	6.91989
PLOD1	0.699525	8.93701	5.59043	1.68957e-07	3.31635e-06	6.91874
RNFT1	-0.591544	8.78497	-5.58927	1.69837e-07	3.33075e-06	6.91374
CBFB	0.696769	9.24148	5.58907	1.69992e-07	3.33091e-06	6.91286
GIMAP1-GIMAP5	1.08253	7.90743	5.58795	1.70849e-07	3.34481e-06	6.90802
TMEM177	-0.583748	7.90688	-5.58524	1.72927e-07	3.38257e-06	6.89639
RNU6-1165P	-0.633235	4.2187	-5.57852	1.78205e-07	3.47385e-06	6.86746
ACER2	-0.764831	6.64498	-5.57734	1.79147e-07	3.48623e-06	6.86239
C1R	1.54072	9.14737	5.57691	1.79493e-07	3.48998e-06	6.86053
PLEKHG1	0.593175	7.49709	5.57437	1.81544e-07	3.52381e-06	6.8496
CYP4F2	-1.12188	6.6899	-5.57068	1.84556e-07	3.57313e-06	6.83376
IFT57	-0.601658	7.60722	-5.57015	1.84997e-07	3.57861e-06	6.83147
MYLIP	-0.723278	8.01759	-5.56722	1.87436e-07	3.61348e-06	6.81886
PIGZ	-1.62419	8.14998	-5.56032	1.93296e-07	3.70444e-06	6.78925
FKBP11	1.11099	8.09897	5.56004	1.93537e-07	3.70593e-06	6.78805
ZAK	0.822843	6.59267	5.55859	1.94795e-07	3.72687e-06	6.78181
IGKV1D-33	1.99985	10.7784	5.55611	1.96965e-07	3.75574e-06	6.77115
STEAP4	2.31769	7.26621	5.55573	1.97292e-07	3.75881e-06	6.76956
SNX4	-0.662894	7.90417	-5.55332	1.99425e-07	3.79327e-06	6.75922
DTX4	-0.69842	8.89778	-5.55294	1.99769e-07	3.79327e-06	6.75756
PDIA3	0.634773	11.1222	5.55115	2.0137e-07	3.81488e-06	6.74988
C4B	1.64381	8.05314	5.54457	2.07359e-07	3.91774e-06	6.72168
HOXA7	-0.87873	8.17967	-5.54202	2.09736e-07	3.95279e-06	6.71072
TMEM236	-2.17788	8.27245	-5.54142	2.10294e-07	3.96002e-06	6.70816
ADARB1	0.626637	7.12732	5.53468	2.16705e-07	4.06389e-06	6.67928
HAPLN3	1.11295	7.23896	5.53322	2.18118e-07	4.08052e-06	6.67303
ELOVL5	1.4422	8.79492	5.53284	2.18483e-07	4.08374e-06	6.67142
ACO2	-0.641539	10.195	-5.5319	2.19402e-07	4.09754e-06	6.66738
TM4SF18	1.32327	6.88851	5.53027	2.21e-07	4.12401e-06	6.6604
RNU1-59P	1.14144	6.91546	5.52818	2.23064e-07	4.1557e-06	6.65146
RAB8B	1.0068	8.15152	5.5279	2.23345e-07	4.15751e-06	6.65025
ZNF252P	-0.681227	6.72991	-5.52692	2.24321e-07	4.17226e-06	6.64605
SELP	2.036	7.11715	5.52664	2.246e-07	4.17402e-06	6.64486
IL33	1.45873	6.20289	5.52227	2.29004e-07	4.24893e-06	6.62618
HSP90B1	0.628413	12.2341	5.52146	2.29831e-07	4.26079e-06	6.62271
PHLDA2	0.591281	8.96922	5.51782	2.33584e-07	4.3233e-06	6.60714
SLC15A3	0.788888	7.5614	5.51274	2.38911e-07	4.41111e-06	6.58545
CEBPB	0.959422	8.81695	5.50708	2.44996e-07	4.51246e-06	6.56126
LDLR	0.773189	10.4343	5.50577	2.46433e-07	4.53525e-06	6.55564
EPB41L4B	-0.955904	8.00052	-5.50422	2.48133e-07	4.55959e-06	6.54903
SCD	1.20336	9.70101	5.5042	2.48157e-07	4.55959e-06	6.54893
ABHD3	-0.839573	9.54814	-5.50271	2.49796e-07	4.58599e-06	6.5426
ALDH5A1	-0.715246	6.57221	-5.50187	2.50732e-07	4.59945e-06	6.53901
ICAM2	1.08421	8.51958	5.50035	2.52435e-07	4.62322e-06	6.5325
CYP4F12	-1.19019	7.39929	-5.49384	2.59823e-07	4.73181e-06	6.50476
SLC6A6	1.34228	8.15646	5.49224	2.61675e-07	4.76173e-06	6.49793
TNFRSF10B	0.715697	8.46073	5.4882	2.66406e-07	4.83619e-06	6.4807
NGEF	-0.733786	7.45184	-5.48675	2.68126e-07	4.86354e-06	6.47451
NR4A2	1.7983	8.2327	5.48642	2.68519e-07	4.86678e-06	6.4731
MIR196A1	-1.02891	7.20584	-5.48594	2.69089e-07	4.87322e-06	6.47107
SDHD	-0.601611	9.61531	-5.48473	2.70535e-07	4.8955e-06	6.46591
COL1A1	1.63151	9.84749	5.48368	2.71801e-07	4.91059e-06	6.46142
PLXND1	0.869138	7.90651	5.48288	2.72761e-07	4.924e-06	6.45804
INSC	0.990275	6.91531	5.48028	2.75922e-07	4.97288e-06	6.44696
PMEPA1	0.718162	8.49235	5.47715	2.7978e-07	5.03073e-06	6.43361
PTPRM	1.09059	7.83634	5.47603	2.81166e-07	5.04765e-06	6.42886
QSOX1	0.732067	10.4241	5.47557	2.81741e-07	5.05398e-06	6.42689
CCDC167	0.59684	7.02818	5.47498	2.82475e-07	5.05723e-06	6.42439
SLC20A1	-0.946665	8.85223	-5.47489	2.8259e-07	5.05723e-06	6.424
CASP1	1.21804	8.94406	5.47316	2.84769e-07	5.09175e-06	6.41661
CD40	0.847324	6.55189	5.46692	2.92743e-07	5.21352e-06	6.39007
ENG	1.36253	9.26127	5.46677	2.9293e-07	5.21352e-06	6.38945
HPGDS	-1.2154	6.13565	-5.46589	2.94075e-07	5.2257e-06	6.3857
RNF5	-0.671939	7.84927	-5.46405	2.96477e-07	5.26426e-06	6.37788
TNC	2.46904	8.7951	5.46213	2.99009e-07	5.29679e-06	6.36971
ECH1	-0.694953	11.1706	-5.46042	3.01283e-07	5.33292e-06	6.36243
TNIP3	3.38225	8.25211	5.45923	3.02869e-07	5.35682e-06	6.35738
GPD1L	-1.05562	8.20979	-5.45589	3.07366e-07	5.42139e-06	6.34321
DDX26B	-0.636143	6.96959	-5.45564	3.07713e-07	5.42139e-06	6.34212
ITPKA	-0.623991	7.33191	-5.45484	3.08805e-07	5.4364e-06	6.33872
GPX8	1.12278	6.05316	5.45118	3.13833e-07	5.50784e-06	6.3232
CRIP2	0.885027	8.47462	5.44797	3.18315e-07	5.58124e-06	6.30957
EMB	1.1144	7.2257	5.44784	3.18507e-07	5.58124e-06	6.30899
DISP2	-0.644245	7.71556	-5.44295	3.25452e-07	5.6881e-06	6.28825
IL7R	1.999	8.29432	5.44176	3.27167e-07	5.70657e-06	6.2832
LY6E	0.941187	7.9651	5.44064	3.28794e-07	5.73055e-06	6.27844
IGFBP5	2.04216	9.25853	5.44026	3.29339e-07	5.73564e-06	6.27685
MRPL35	-0.77339	8.59095	-5.4332	3.39758e-07	5.8945e-06	6.24691
IGKV3D-20	2.21201	11.2588	5.43255	3.40733e-07	5.9024e-06	6.24416
SLC25A4	-0.613073	8.56344	-5.43066	3.43581e-07	5.93202e-06	6.23616
IYD	-0.838654	6.71375	-5.42736	3.48619e-07	5.99439e-06	6.22217
TNFRSF12A	0.84243	9.50525	5.42671	3.4962e-07	6.00141e-06	6.21942
ARV1	-0.71889	8.24407	-5.42642	3.50066e-07	6.00452e-06	6.21819
KLC4	-0.627273	7.75533	-5.4252	3.51954e-07	6.02486e-06	6.21302
ST3GAL4	0.986783	8.63845	5.42514	3.52047e-07	6.02486e-06	6.21277
TRERF1	0.679556	6.58161	5.42414	3.53608e-07	6.04701e-06	6.20852
AGFG2	-0.605426	7.41549	-5.42169	3.57442e-07	6.0911e-06	6.19815
FAM46C	1.01184	9.65981	5.41809	3.63161e-07	6.16669e-06	6.1829
PTGS2	2.72841	8.06488	5.41799	3.63322e-07	6.16669e-06	6.18248
RILPL2	0.805159	7.09663	5.41695	3.64981e-07	6.1764e-06	6.1781
FAM162A	-1.06702	8.0101	-5.4162	3.66185e-07	6.19156e-06	6.17493
AHCYL2	-1.07799	10.9385	-5.41469	3.68636e-07	6.22434e-06	6.16852
NAT1	-0.643664	6.39158	-5.41318	3.71099e-07	6.26126e-06	6.16212
TGFBR2	0.670967	9.87944	5.40517	3.84406e-07	6.44746e-06	6.12827
LRRC19	-1.86019	8.15807	-5.40351	3.87225e-07	6.48517e-06	6.12125
C6orf136	-0.757555	7.85284	-5.40106	3.91417e-07	6.54207e-06	6.11091
GBP4	1.8576	7.77415	5.40102	3.91479e-07	6.54207e-06	6.11076
KLHDC2	-0.59183	8.543	-5.39878	3.95362e-07	6.59458e-06	6.10127
TMED6	-0.941131	5.83477	-5.39726	3.98012e-07	6.63159e-06	6.09486
MXI1	-0.729638	8.29135	-5.39187	4.07551e-07	6.77312e-06	6.07211
MAML3	-0.78121	7.8108	-5.39002	4.10884e-07	6.81108e-06	6.06428
MPI	-0.603615	8.22508	-5.38823	4.14124e-07	6.85478e-06	6.05674
ABCA5	-0.829039	7.41008	-5.38553	4.1905e-07	6.93127e-06	6.04538
CSRNP1	0.744977	7.19727	5.3852	4.19661e-07	6.93632e-06	6.04398
PAPSS2	-0.743402	10.9761	-5.37946	4.30368e-07	7.0875e-06	6.01978
SLC7A11	1.89774	8.19416	5.37917	4.30923e-07	7.08916e-06	6.01854
RGCC	1.05423	8.23558	5.37907	4.31102e-07	7.08916e-06	6.01814
CDH11	1.31491	8.3683	5.37891	4.31406e-07	7.08916e-06	6.01746
PTGDR	-1.24682	7.74425	-5.37643	4.36133e-07	7.16166e-06	6.007
GNA11	-0.906393	10.181	-5.37613	4.36716e-07	7.16605e-06	6.00571
IDH2	0.582189	10.2929	5.37571	4.37517e-07	7.17402e-06	6.00395
TRAK2	-0.638035	8.84193	-5.37111	4.46429e-07	7.3096e-06	5.98458
GABRA2	-1.01622	5.71066	-5.36831	4.51938e-07	7.38393e-06	5.9728
CYYR1	1.34484	7.53738	5.36831	4.51945e-07	7.38393e-06	5.97279
ARID5A	0.644005	7.26611	5.36598	4.56583e-07	7.449e-06	5.96298
ABCC13	-0.778635	5.56183	-5.36581	4.56928e-07	7.44927e-06	5.96226
NCS1	0.671162	7.07568	5.36489	4.58766e-07	7.46851e-06	5.9584
PPP1R14C	-0.605281	7.27409	-5.36434	4.59882e-07	7.4791e-06	5.95607
RNF213	1.03387	9.59066	5.36285	4.62876e-07	7.51388e-06	5.94984
TESC	0.750687	7.84649	5.36206	4.64497e-07	7.53481e-06	5.94648
F2R	1.17511	7.63711	5.36138	4.65864e-07	7.55159e-06	5.94366
PDHA1	-0.755991	9.23309	-5.36069	4.67284e-07	7.5692e-06	5.94074
NEK3	-0.726803	7.7146	-5.36048	4.67709e-07	7.57069e-06	5.93986
RAPGEFL1	-1.28289	9.01191	-5.35834	4.72118e-07	7.63117e-06	5.93085
ICAM1	1.79457	8.74379	5.35783	4.73164e-07	7.64265e-06	5.92873
ZNF844	-0.697747	5.8878	-5.35683	4.75246e-07	7.66707e-06	5.92451
SERPINA3	2.22232	8.01834	5.35678	4.75352e-07	7.66707e-06	5.9243
COL6A3	1.90898	9.05752	5.35403	4.81107e-07	7.7489e-06	5.91274
ACKR1	0.873642	7.00559	5.3537	4.81807e-07	7.75467e-06	5.91134
IL1R1	1.45732	8.41907	5.353	4.83275e-07	7.77278e-06	5.90842
ADCY6	-0.686961	8.72976	-5.34738	4.95306e-07	7.96065e-06	5.88481
PGM1	-0.656596	8.82836	-5.34255	5.05885e-07	8.11919e-06	5.86452
TEK	1.08998	7.00102	5.34195	5.07211e-07	8.13472e-06	5.862
HLA-DPB1	1.26003	10.7017	5.34144	5.08345e-07	8.14278e-06	5.85986
BAG2	0.818068	7.14525	5.3403	5.10897e-07	8.17075e-06	5.85505
NAPEPLD	-0.963697	8.22891	-5.33975	5.12123e-07	8.1846e-06	5.85275
FBXO16	0.919373	6.38147	5.33895	5.13921e-07	8.20756e-06	5.84938
TTC9	0.618261	7.93527	5.33875	5.14354e-07	8.20869e-06	5.84858
AREG	1.5435	8.94805	5.33241	5.28802e-07	8.40973e-06	5.82198
LBH	0.808992	7.22296	5.33171	5.30438e-07	8.42984e-06	5.81901
PPP1R3B	-0.585624	7.43559	-5.33031	5.33689e-07	8.46366e-06	5.81315
PCOLCE	1.35253	8.93118	5.32772	5.39751e-07	8.54199e-06	5.8023
ASPA	-0.653015	4.5299	-5.32593	5.43992e-07	8.59014e-06	5.79479
EDN1	-0.998663	7.95293	-5.32485	5.46557e-07	8.60248e-06	5.79027
CASP4	1.02937	8.15987	5.32483	5.46604e-07	8.60248e-06	5.79019
DNAJC10	0.789436	9.24202	5.32409	5.48379e-07	8.62365e-06	5.78708
NRN1	0.792166	6.93924	5.32379	5.49082e-07	8.62365e-06	5.78585
AKAP2	0.885175	7.1943	5.32351	5.49769e-07	8.62837e-06	5.78465
ENPP2	1.32102	8.78361	5.32273	5.51626e-07	8.65153e-06	5.78141
ZNF57	-0.840707	7.9703	-5.31835	5.62273e-07	8.80029e-06	5.76306
TSTA3	0.81876	9.95411	5.3122	5.77556e-07	9.02705e-06	5.73731
MEP1AP4	-1.27183	6.93275	-5.31199	5.78089e-07	9.02916e-06	5.73643
SUCLG2	-0.871441	9.4493	-5.30925	5.85025e-07	9.12007e-06	5.72498
GPR125	-0.914837	8.10464	-5.3053	5.95179e-07	9.23891e-06	5.70846
TRANK1	-0.721813	8.67271	-5.30501	5.95935e-07	9.24432e-06	5.70724
UNC13D	0.934564	8.30028	5.30343	6.00051e-07	9.28913e-06	5.70064
COL1A2	1.60755	9.51083	5.29994	6.09249e-07	9.39949e-06	5.68604
PRAF2	0.692534	7.49463	5.29961	6.10127e-07	9.40664e-06	5.68466
ENTPD1	1.50947	8.49088	5.29823	6.1379e-07	9.4567e-06	5.67891
SLFN11	1.50333	7.54485	5.29674	6.17793e-07	9.50547e-06	5.67267
CWH43	-2.42224	7.06935	-5.29626	6.19071e-07	9.51513e-06	5.67069
RIPK2	1.04042	7.76937	5.29619	6.19259e-07	9.51513e-06	5.6704
UGT2B10	-0.885803	5.66233	-5.29013	6.35809e-07	9.74964e-06	5.64508
GJA1	1.6247	7.60623	5.28881	6.39477e-07	9.78607e-06	5.63956
SBNO2	0.707398	8.68146	5.2874	6.43405e-07	9.83955e-06	5.63369
HLA-DQB1	1.40913	8.35864	5.28623	6.467e-07	9.88145e-06	5.62878
AAED1	1.01067	7.49754	5.28584	6.47777e-07	9.88145e-06	5.62719
TCF4	1.38663	8.78109	5.2848	6.5071e-07	9.91122e-06	5.62285
FILIP1L	0.794405	6.83296	5.28049	6.63022e-07	1.00785e-05	5.60487
CCDC109B	1.01187	7.30545	5.27958	6.65641e-07	1.0106e-05	5.60108
GPR39	-0.926051	8.25899	-5.27826	6.69471e-07	1.01561e-05	5.59558
GPR183	1.37525	6.85337	5.27542	6.77792e-07	1.02686e-05	5.58372
STAT2	0.745075	8.55769	5.27511	6.787e-07	1.02755e-05	5.58244
INPP5D	1.08335	8.55248	5.27464	6.80092e-07	1.02897e-05	5.58047
C5orf52	-0.704294	5.81886	-5.27326	6.8418e-07	1.03447e-05	5.57472
OTUB2	0.700784	7.02199	5.27177	6.88614e-07	1.03979e-05	5.56852
PHC3	-0.585038	7.62884	-5.26725	7.0226e-07	1.05828e-05	5.5497
SMIM14	-0.806915	9.5418	-5.26696	7.03142e-07	1.05891e-05	5.54849
GEM	1.12663	7.28295	5.2665	7.04551e-07	1.06033e-05	5.54657
CH25H	0.956493	6.93338	5.26475	7.09928e-07	1.06701e-05	5.53928
IGKV3OR2-268	2.00477	9.60442	5.26431	7.11266e-07	1.06831e-05	5.53747
RN7SL688P	-0.62825	6.26265	-5.25859	7.29129e-07	1.09225e-05	5.51367
GRTP1	-0.581232	8.275	-5.2562	7.36734e-07	1.10219e-05	5.50372
THBD	0.839685	7.58918	5.25565	7.38501e-07	1.10354e-05	5.50142
OLFM1	0.712748	7.16195	5.25348	7.45453e-07	1.1123e-05	5.49243
ROBO1	1.34535	7.91947	5.25227	7.49386e-07	1.1167e-05	5.48738
ARHGAP44	-1.25383	7.83809	-5.25148	7.51959e-07	1.11907e-05	5.48409
IGSF3	-0.826139	7.74967	-5.25027	7.55903e-07	1.12347e-05	5.47908
RFK	-0.581879	9.48534	-5.24765	7.64545e-07	1.1344e-05	5.46817
DOC2B	1.0873	7.69764	5.24676	7.67494e-07	1.13771e-05	5.46448
TMEM9B	-0.649565	9.52547	-5.24622	7.69293e-07	1.13964e-05	5.46223
JAM2	1.01282	7.81815	5.24532	7.72296e-07	1.1426e-05	5.4585
ZNF532	0.859767	7.34851	5.2442	7.76056e-07	1.14741e-05	5.45384
LRRC31	-1.42867	6.91187	-5.24296	7.80216e-07	1.15206e-05	5.44871
LZIC	-0.6143	7.869	-5.23762	7.98468e-07	1.17519e-05	5.42653
LPGAT1	0.86297	8.77773	5.23501	8.07533e-07	1.18699e-05	5.4157
RCN1	0.646147	9.59861	5.23316	8.14009e-07	1.1942e-05	5.40804
APOL3	0.748929	6.69472	5.23144	8.20072e-07	1.2002e-05	5.40092
MCAM	1.32007	8.11094	5.23017	8.24593e-07	1.20428e-05	5.39565
MB21D1	1.06716	6.9069	5.22971	8.26234e-07	1.2059e-05	5.39374
ST3GAL5	0.66291	7.13787	5.22741	8.34499e-07	1.21331e-05	5.38419
CCDC69	1.14277	7.58017	5.2273	8.34894e-07	1.21331e-05	5.38374
LDB2	0.912628	7.39295	5.22725	8.35076e-07	1.21331e-05	5.38353
RNF103	-0.636719	8.81578	-5.22713	8.35509e-07	1.21331e-05	5.38304
NDUFA5	-0.624582	7.19213	-5.22407	8.46646e-07	1.22779e-05	5.37034
SLC25A23	-0.936702	8.27141	-5.2223	8.53133e-07	1.23405e-05	5.36302
MMP3	3.77188	8.53742	5.21838	8.67693e-07	1.25432e-05	5.34679
RASSF5	1.03795	7.97504	5.2163	8.75514e-07	1.26482e-05	5.33818
LMAN1	0.74008	10.3208	5.21253	8.89875e-07	1.28475e-05	5.32258
MTMR8	-0.772143	6.49371	-5.21167	8.93202e-07	1.28755e-05	5.319
CCL24	1.25502	8.35207	5.21055	8.97505e-07	1.2919e-05	5.31439
NUCB2	0.906569	8.9999	5.21051	8.97675e-07	1.2919e-05	5.31421
LOC101059935	-1.12097	5.61118	-5.20989	9.00082e-07	1.29454e-05	5.31164
MT1L	-0.818826	9.19864	-5.20974	9.00651e-07	1.29454e-05	5.31104
PLEKHG2	0.806161	7.85715	5.20642	9.13658e-07	1.31075e-05	5.29729
PRR15	-1.15178	9.61539	-5.20249	9.29277e-07	1.33203e-05	5.28104
RHBDF2	0.609766	7.03221	5.20021	9.38429e-07	1.34289e-05	5.27164
MT1P1	-0.911827	12.0498	-5.19721	9.50654e-07	1.35953e-05	5.25923
IGHV3-74	1.58906	12.1949	5.19515	9.59114e-07	1.36904e-05	5.25073
VCAM1	1.54043	7.53952	5.19148	9.74401e-07	1.38912e-05	5.23557
FMO5	-1.58678	8.16936	-5.19087	9.76951e-07	1.39188e-05	5.23307
AKAP1	-0.913874	9.24124	-5.19009	9.80252e-07	1.39571e-05	5.22984
PTPN14	0.644277	7.33633	5.18938	9.83243e-07	1.39909e-05	5.22691
CMTM7	0.713485	7.95521	5.1887	9.86113e-07	1.40054e-05	5.22412
ITGB3	1.0031	7.30958	5.18347	1.00857e-06	1.42797e-05	5.20253
ARL4C	0.682419	7.41265	5.18062	1.02103e-06	1.44445e-05	5.19076
ZNF681	-0.771475	5.38817	-5.18051	1.02148e-06	1.44445e-05	5.19034
PCK1	-2.90188	8.1239	-5.17638	1.03982e-06	1.46764e-05	5.17328
CD93	1.43259	8.26198	5.17548	1.04381e-06	1.47236e-05	5.16961
TWSG1	0.703989	8.25226	5.17456	1.04798e-06	1.4764e-05	5.16579
CYB5R2	0.646066	7.16021	5.17384	1.05119e-06	1.48001e-05	5.16286
NDUFA2	-0.631999	8.71459	-5.17099	1.06416e-06	1.49518e-05	5.15111
NUDT16P1	-0.685664	8.20708	-5.1709	1.0646e-06	1.49518e-05	5.15071
CLDN23	-0.644481	8.45518	-5.16896	1.07349e-06	1.50394e-05	5.14274
MMP7	2.93509	7.41195	5.16543	1.08989e-06	1.52237e-05	5.1282
PLCD3	-0.90319	9.54074	-5.16543	1.0899e-06	1.52237e-05	5.1282
SLC35D2	-0.748886	9.51321	-5.1649	1.09237e-06	1.52459e-05	5.12603
AGPAT4	0.992659	6.94452	5.1645	1.09427e-06	1.52459e-05	5.12436
HOMER1	0.63847	5.53008	5.1642	1.09567e-06	1.52561e-05	5.12313
ERG	0.941484	6.68966	5.16188	1.10662e-06	1.53897e-05	5.1136
HYOU1	0.6183	9.83324	5.16167	1.1076e-06	1.53939e-05	5.11276
MICALCL	-0.748994	6.74093	-5.15936	1.11865e-06	1.55375e-05	5.10324
CREBRF	-0.598848	7.66871	-5.15684	1.13083e-06	1.56728e-05	5.09286
CYCS	-0.647596	9.00027	-5.15595	1.13513e-06	1.57092e-05	5.08922
CHST11	1.17061	8.76709	5.15572	1.13624e-06	1.5715e-05	5.08829
BTG2	1.00674	9.36864	5.15417	1.14386e-06	1.58108e-05	5.08188
IGHV3-35	1.23871	10.3185	5.15354	1.14696e-06	1.58439e-05	5.07929
PLIN2	-0.687322	7.96535	-5.15137	1.15764e-06	1.59721e-05	5.07041
PIM2	2.01765	9.19753	5.14921	1.16844e-06	1.61112e-05	5.06151
PRDX4	0.630165	7.4983	5.14197	1.20522e-06	1.65481e-05	5.03181
OSBPL8	0.735025	8.29705	5.14121	1.20919e-06	1.65725e-05	5.02866
RNF128	-0.903855	8.00507	-5.13948	1.21816e-06	1.66653e-05	5.02158
NID1	1.3868	8.01278	5.13849	1.22332e-06	1.67259e-05	5.01753
SNORD60	1.05881	6.8675	5.13687	1.23186e-06	1.68122e-05	5.01086
SMOX	0.980566	7.52881	5.1325	1.25509e-06	1.71061e-05	4.99296
MAP3K13	-0.770196	7.63034	-5.1312	1.26211e-06	1.71632e-05	4.98762
VDR	-0.737616	9.32436	-5.13088	1.26384e-06	1.71764e-05	4.98631
VSIG1	2.98789	7.46558	5.12812	1.27883e-06	1.73387e-05	4.97501
COL4A1	1.49136	8.24969	5.12261	1.30931e-06	1.77257e-05	4.95245
HIGD1A	-0.845615	9.56869	-5.12084	1.31927e-06	1.78125e-05	4.94518
CXorf36	0.850704	5.99882	5.12044	1.32155e-06	1.78221e-05	4.94353
IGHV3OR16-7	1.65813	11.45	5.12025	1.32262e-06	1.78259e-05	4.94276
VIM	1.16944	10.0992	5.1199	1.32457e-06	1.78416e-05	4.94135
AKIRIN2	0.60845	9.10583	5.11947	1.327e-06	1.78637e-05	4.93959
TGFBI	1.40844	9.62234	5.11903	1.32955e-06	1.78874e-05	4.93775
CLDN1	1.79306	7.81909	5.11431	1.35658e-06	1.81618e-05	4.91847
ELTD1	1.90296	7.28646	5.11263	1.36637e-06	1.82718e-05	4.91158
RNU6-570P	-1.17771	5.46683	-5.11168	1.37189e-06	1.83269e-05	4.90772
A1CF	-1.31312	8.58364	-5.11015	1.3809e-06	1.84255e-05	4.90145
GPR160	-1.08583	8.27923	-5.10677	1.40095e-06	1.86056e-05	4.88764
IGKV1OR2-3	2.3361	10.8659	5.10658	1.40214e-06	1.86105e-05	4.88683
ADAM19	1.17794	8.19829	5.10259	1.42618e-06	1.89185e-05	4.87055
SPR	-0.62971	8.68138	-5.10006	1.44163e-06	1.90901e-05	4.86023
ARHGDIB	1.28173	9.1451	5.09959	1.44453e-06	1.91173e-05	4.8583
EPHX2	-1.35191	7.32188	-5.0987	1.45003e-06	1.9179e-05	4.85466
IL6ST	0.709128	9.9577	5.09672	1.46235e-06	1.93194e-05	4.84656
ANXA1	1.84642	10.9214	5.09589	1.46749e-06	1.9376e-05	4.8432
PLXNA1	0.625815	8.3129	5.09082	1.49954e-06	1.97762e-05	4.82251
FEZ1	0.708426	5.96141	5.08811	1.51694e-06	1.99941e-05	4.81146
TMEM72	-0.95771	7.71178	-5.0875	1.52091e-06	2.00253e-05	4.80896
COL15A1	1.40476	8.15399	5.08734	1.52196e-06	2.00253e-05	4.8083
EHHADH	-0.862011	7.26109	-5.08715	1.52319e-06	2.00299e-05	4.80752
WASL	-0.630331	10.0878	-5.0861	1.52998e-06	2.01076e-05	4.80326
CLU	1.36855	8.03742	5.08512	1.53639e-06	2.01685e-05	4.79926
CYR61	1.64251	7.46917	5.08105	1.56327e-06	2.04924e-05	4.78265
BGN	1.7869	9.24152	5.07867	1.57919e-06	2.06824e-05	4.77295
GUCA2A	-2.66576	9.82666	-5.07716	1.58933e-06	2.07913e-05	4.76682
CXCR4	1.37573	7.44572	5.07697	1.59059e-06	2.07958e-05	4.76606
PPARD	-0.66811	8.77684	-5.07683	1.59159e-06	2.0797e-05	4.76546
CD2AP	-0.634866	10.4961	-5.07661	1.59307e-06	2.08042e-05	4.76457
JAK3	1.08172	7.36515	5.07547	1.60082e-06	2.08695e-05	4.75993
GRK5	0.709169	7.27379	5.07407	1.61034e-06	2.09695e-05	4.75425
PLEKHG6	-1.02878	7.81683	-5.0737	1.61292e-06	2.09911e-05	4.75272
LAMB2	0.699305	8.38236	5.07129	1.6295e-06	2.11583e-05	4.74292
KCNK5	-0.87092	7.78761	-5.06881	1.64676e-06	2.13581e-05	4.73283
SLC2A3	1.73158	8.07956	5.06503	1.67342e-06	2.16667e-05	4.71746
PANX1	0.781578	8.14892	5.06503	1.67342e-06	2.16667e-05	4.71746
RHOJ	1.29215	7.87368	5.06382	1.68207e-06	2.17618e-05	4.71253
ARHGAP29	1.26962	6.02972	5.06373	1.68268e-06	2.17618e-05	4.71218
PLAU	1.79112	8.57574	5.06275	1.6897e-06	2.18276e-05	4.70819
PRPS1	0.851572	7.62589	5.06224	1.69338e-06	2.18629e-05	4.70611
ZBP1	1.17121	7.93336	5.05823	1.72244e-06	2.21875e-05	4.68982
IGHV3-73	1.73745	11.708	5.05802	1.72398e-06	2.21893e-05	4.68896
BEST4	-1.8305	8.09963	-5.05503	1.746e-06	2.24343e-05	4.67681
TCN1	2.78935	7.59516	5.05362	1.7565e-06	2.25241e-05	4.67108
DEGS1	0.689126	7.67821	5.05345	1.75778e-06	2.25278e-05	4.67038
PFKFB2	-0.848077	8.13975	-5.04887	1.7922e-06	2.28555e-05	4.65182
C4BPB	1.67457	6.67973	5.04863	1.79404e-06	2.28555e-05	4.65083
SEMA6D	-0.751726	8.22893	-5.04852	1.79486e-06	2.28555e-05	4.65039
S100A8	3.26043	7.92711	5.0464	1.81109e-06	2.30039e-05	4.64178
NQO2	0.743831	8.13447	5.04609	1.81345e-06	2.30203e-05	4.64054
TMEM106A	0.674614	8.04409	5.04557	1.81751e-06	2.3059e-05	4.63839
DPYD	0.79428	8.02816	5.04459	1.82506e-06	2.31031e-05	4.63443
TGFB1	1.00666	7.76848	5.04215	1.84398e-06	2.33167e-05	4.62456
CRISPLD2	1.135	7.52577	5.03696	1.88497e-06	2.37425e-05	4.60351
F2RL2	1.36734	6.8001	5.0368	1.88628e-06	2.37458e-05	4.60285
ADRBK2	0.853631	6.72929	5.03661	1.88784e-06	2.37522e-05	4.60206
AIFM3	-0.908324	7.63727	-5.03563	1.89565e-06	2.38373e-05	4.59811
WIPF1	1.18194	9.10409	5.03468	1.90331e-06	2.39204e-05	4.59425
OLFM4	1.92571	12.5632	5.03381	1.91027e-06	2.39946e-05	4.59075
SPARCL1	1.57092	8.95356	5.0319	1.92579e-06	2.41628e-05	4.58301
XKR9	0.854149	5.22751	5.02997	1.94164e-06	2.4308e-05	4.57516
DAO	-0.670197	5.31272	-5.02908	1.94897e-06	2.43686e-05	4.57156
SLC9A2	-1.53497	9.05365	-5.02899	1.9497e-06	2.43686e-05	4.5712
REL	0.580955	8.89687	5.02732	1.96352e-06	2.45271e-05	4.56444
SNORA7B	0.926691	9.61322	5.02701	1.96611e-06	2.45271e-05	4.56318
SNORD50A	0.939357	8.22998	5.02694	1.9667e-06	2.45271e-05	4.56289
SYT11	0.999578	6.68655	5.02036	2.02218e-06	2.51637e-05	4.53627
OVOL2	-0.596156	7.34851	-5.02001	2.02513e-06	2.51866e-05	4.53488
ALDH6A1	-0.60421	7.11663	-5.01726	2.04878e-06	2.54389e-05	4.52377
COX5B	-0.592786	10.4301	-5.01538	2.06518e-06	2.55801e-05	4.51614
NBEAL1	-0.724352	8.30447	-5.01276	2.08813e-06	2.58287e-05	4.50557
RGS5	1.83636	8.52522	5.01205	2.09438e-06	2.58778e-05	4.5027
STRBP	-0.614758	7.8395	-5.01107	2.10312e-06	2.59717e-05	4.49872
PIP5K1B	-0.854674	8.39312	-5.01066	2.10674e-06	2.60022e-05	4.49708
LYPD6B	0.794695	7.35873	5.01051	2.10808e-06	2.60046e-05	4.49647
ADH1A	-1.23289	7.14511	-5.00764	2.13378e-06	2.63074e-05	4.48487
TMTC1	1.14892	6.76503	5.00699	2.13961e-06	2.63649e-05	4.48227
ANPEP	-1.95956	10.1642	-5.00635	2.14539e-06	2.64219e-05	4.47968
ETS1	0.948333	8.81475	5.00588	2.1497e-06	2.64319e-05	4.47776
MT2P1	-0.738235	11.7292	-5.00466	2.16079e-06	2.65538e-05	4.47284
SEMA6A	-1.218	8.88729	-5.00311	2.17496e-06	2.66847e-05	4.46659
NDUFB5	-0.596525	9.28798	-4.99951	2.2082e-06	2.7034e-05	4.45208
PXDC1	0.87288	7.39759	4.99848	2.21786e-06	2.71377e-05	4.4479
CALCRL	1.67697	7.20214	4.99774	2.22476e-06	2.71929e-05	4.44493
GIMAP6	0.660106	7.09048	4.99761	2.22596e-06	2.71929e-05	4.44441
ABCC1	0.725734	8.74673	4.99567	2.24428e-06	2.73725e-05	4.43657
IQSEC1	0.679639	8.11599	4.99216	2.27775e-06	2.7736e-05	4.42241
ZFP36	0.868217	9.92784	4.98891	2.30914e-06	2.80411e-05	4.40932
FLT1	1.28109	7.246	4.98867	2.31145e-06	2.80411e-05	4.40837
STRIP2	1.40284	6.67934	4.98602	2.3374e-06	2.83227e-05	4.39768
PRO2012	-0.87794	7.06638	-4.98514	2.34605e-06	2.84002e-05	4.39415
DPY19L1	0.724927	8.2858	4.98283	2.36896e-06	2.86551e-05	4.38486
MMP12	2.52867	9.03141	4.98277	2.36963e-06	2.86551e-05	4.38459
PRKCDBP	0.96146	8.09327	4.97697	2.42811e-06	2.92688e-05	4.36127
CAV1	1.37132	8.55219	4.97421	2.45646e-06	2.95322e-05	4.35017
EGR2	0.638217	7.34677	4.97223	2.47704e-06	2.9748e-05	4.34219
PLCE1	-1.19215	9.19692	-4.97142	2.48549e-06	2.98338e-05	4.33893
CXCL11	2.21147	7.0313	4.97127	2.48708e-06	2.98371e-05	4.33832
IGHV3-7	1.18017	13.1955	4.97025	2.49776e-06	2.99475e-05	4.33423
IKBIP	0.890275	6.35594	4.97014	2.49892e-06	2.99475e-05	4.33378
MID2	0.637453	7.00467	4.96958	2.50474e-06	2.99856e-05	4.33156
MEST	-0.601786	8.26749	-4.96716	2.53033e-06	3.026e-05	4.32184
IGHV3-52	1.32143	13.266	4.96652	2.53716e-06	3.03257e-05	4.31926
BNIP3	1.25804	7.93212	4.9645	2.55883e-06	3.05526e-05	4.31113
ACOX2	-0.64692	7.05336	-4.96363	2.56816e-06	3.06479e-05	4.30765
FADS1	1.34361	7.51891	4.96338	2.57083e-06	3.06637e-05	4.30665
IGKV1D-16	1.3059	10.7284	4.96272	2.57803e-06	3.07198e-05	4.30398
CFI	1.78	6.69826	4.9627	2.57825e-06	3.07198e-05	4.3039
ID2	-0.612068	9.84169	-4.96229	2.58263e-06	3.07426e-05	4.30228
LOC642131	1.94496	9.77718	4.96221	2.58357e-06	3.07426e-05	4.30193
ZNF664-FAM101A	-0.800532	8.29423	-4.9597	2.6109e-06	3.10113e-05	4.29186
HSPG2	0.746126	9.1834	4.95941	2.61406e-06	3.10326e-05	4.29071
XK	-0.92965	8.48051	-4.95916	2.61686e-06	3.10495e-05	4.28969
BPNT1	-0.686555	8.0398	-4.95772	2.63274e-06	3.11934e-05	4.2839
RASGRF2	0.843048	6.91218	4.95478	2.66538e-06	3.15594e-05	4.27212
SPOCK2	0.751057	8.01477	4.95442	2.6694e-06	3.1574e-05	4.27068
CHI3L1	2.96672	8.78979	4.95367	2.67778e-06	3.16067e-05	4.26768
SUCLG1	-0.668699	9.27707	-4.95355	2.67912e-06	3.16067e-05	4.2672
CYP27A1	-0.887009	7.42896	-4.95272	2.68854e-06	3.17013e-05	4.26385
LOXL2	1.39137	8.36784	4.95113	2.70651e-06	3.18966e-05	4.25748
HIVEP2	0.784975	7.92742	4.95054	2.71326e-06	3.19265e-05	4.2551
SMARCA1	0.735704	6.55663	4.94825	2.73944e-06	3.21981e-05	4.24592
ATP8B2	0.816304	7.47001	4.94646	2.76006e-06	3.23264e-05	4.23875
HEBP1	-0.621231	8.19196	-4.9439	2.78977e-06	3.26239e-05	4.22851
PLA2G2A	1.29657	11.2617	4.94348	2.79467e-06	3.26501e-05	4.22684
SLC22A18AS	-0.872362	6.84093	-4.93977	2.83848e-06	3.31424e-05	4.21196
CLCN2	-1.04234	8.60469	-4.93894	2.84833e-06	3.32211e-05	4.20865
NFKB2	0.726704	8.15334	4.93879	2.8502e-06	3.32211e-05	4.20803
ZNF204P	-0.96239	5.32332	-4.93871	2.85108e-06	3.32211e-05	4.20773
MEP1A	-1.91057	10.081	-4.93674	2.87475e-06	3.34798e-05	4.19983
TSHZ2	0.910017	6.25924	4.93594	2.88437e-06	3.35402e-05	4.19664
HECTD3	-0.608789	9.77782	-4.9348	2.89818e-06	3.36835e-05	4.19207
MUC1	1.08739	11.2775	4.93377	2.91072e-06	3.37947e-05	4.18794
TTPA	-0.858128	6.39847	-4.93271	2.92367e-06	3.38931e-05	4.1837
LRPPRC	-0.602245	9.32462	-4.93186	2.93405e-06	3.39787e-05	4.18031
MUT	-0.658263	8.87666	-4.92352	3.03819e-06	3.50418e-05	4.14697
OSBPL3	0.844549	7.59385	4.92269	3.04874e-06	3.51386e-05	4.14366
C1S	1.56527	9.34838	4.92019	3.08087e-06	3.5444e-05	4.13364
PTAFR	0.843974	7.46361	4.91811	3.10772e-06	3.57167e-05	4.12535
MMP1	3.24966	8.90396	4.91768	3.11329e-06	3.57575e-05	4.12364
ASAP1	1.05817	8.45906	4.91576	3.13836e-06	3.5996e-05	4.11598
SRGAP2C	0.83217	8.03767	4.91504	3.14784e-06	3.60744e-05	4.11309
ADH1C	-2.49026	9.27984	-4.915	3.14837e-06	3.60744e-05	4.11293
IGFBP7	1.17544	10.2237	4.91161	3.1932e-06	3.65512e-05	4.09942
CCL2	1.89901	8.97724	4.91072	3.20512e-06	3.66663e-05	4.09586
NDUFB9	-0.586474	9.36242	-4.90944	3.22226e-06	3.68096e-05	4.09076
RNU1-106P	0.596715	6.47228	4.90875	3.23157e-06	3.68974e-05	4.08801
CAMK2N1	-0.860653	10.8504	-4.90759	3.2473e-06	3.70398e-05	4.08337
DNAJB11	0.591341	8.80071	4.90658	3.26095e-06	3.71768e-05	4.07936
OR2A9P	-0.612449	7.60938	-4.90611	3.26737e-06	3.7194e-05	4.07748
SLC2A14	0.85144	6.80685	4.90282	3.31249e-06	3.76322e-05	4.06437
FGD5	0.689063	6.44837	4.90228	3.31997e-06	3.76794e-05	4.06222
MYCBP2	0.664946	8.31971	4.90152	3.33049e-06	3.778e-05	4.0592
IGHV3-43	1.20486	12.7244	4.89981	3.35431e-06	3.80312e-05	4.05239
ATP11A	0.779844	7.58113	4.89806	3.37894e-06	3.82722e-05	4.0454
EHD3	0.850654	7.31552	4.89641	3.40229e-06	3.84599e-05	4.03882
TK1	0.674031	8.61389	4.89339	3.4454e-06	3.89085e-05	4.02679
FADS2	1.60625	8.52576	4.89222	3.46224e-06	3.90598e-05	4.02213
CTGF	0.901272	9.37241	4.8886	3.51478e-06	3.96133e-05	4.00774
LDHD	-1.02152	8.13694	-4.88846	3.51677e-06	3.9616e-05	4.0072
EFNA5	-0.781035	7.33391	-4.88757	3.52995e-06	3.97448e-05	4.00363
S1PR1	0.907279	6.12145	4.88484	3.57017e-06	4.00586e-05	3.9928
ORAI2	1.0725	7.88496	4.88212	3.61093e-06	4.0476e-05	3.98196
ADD3	-0.638323	8.99428	-4.88066	3.63288e-06	4.06679e-05	3.97617
ADAM9	0.752521	10.4668	4.8805	3.63531e-06	4.06689e-05	3.97553
SLC1A1	-1.05625	8.29779	-4.87922	3.65473e-06	4.08459e-05	3.97045
SPIRE2	-0.630637	8.35284	-4.87799	3.6734e-06	4.10142e-05	3.96558
THY1	1.43414	8.01434	4.87732	3.68376e-06	4.11096e-05	3.96289
AMT	-0.631874	7.33837	-4.87704	3.688e-06	4.11368e-05	3.96179
SRGN	1.60634	9.14685	4.87602	3.70371e-06	4.12715e-05	3.95773
EXPH5	-1.70318	7.74197	-4.87555	3.71093e-06	4.13316e-05	3.95587
ALPI	-0.65943	7.85887	-4.86948	3.80576e-06	4.22428e-05	3.93177
DENND5A	1.14899	7.78087	4.86447	3.88572e-06	4.30252e-05	3.91191
PAQR8	-0.731382	9.28447	-4.86194	3.92667e-06	4.34363e-05	3.9019
CAV2	0.974545	7.53629	4.8612	3.93887e-06	4.355e-05	3.89894
CTSK	1.61204	8.887	4.86067	3.94758e-06	4.36251e-05	3.89683
IGKC	1.55633	11.3648	4.85883	3.9778e-06	4.38949e-05	3.88955
GBAS	-0.686578	9.09965	-4.85853	3.98266e-06	4.39149e-05	3.88838
FSCN1	0.61251	8.4183	4.85848	3.98347e-06	4.39149e-05	3.88818
TMEM55A	0.836371	6.63079	4.85819	3.98826e-06	4.39463e-05	3.88704
TSC22D3	0.888732	8.34464	4.85693	4.00928e-06	4.41244e-05	3.88202
ITPR1	0.696905	6.86666	4.85592	4.02615e-06	4.4235e-05	3.87801
CD69	1.34538	6.87956	4.85245	4.08442e-06	4.47022e-05	3.86429
ANGPTL2	1.4365	8.21518	4.85167	4.09773e-06	4.48047e-05	3.86118
MRPS36	-0.643409	7.04767	-4.84789	4.1624e-06	4.54244e-05	3.84623
SERPINB9	1.4279	8.72181	4.84632	4.18953e-06	4.56765e-05	3.84003
PDPN	1.08881	7.15895	4.84416	4.22712e-06	4.60422e-05	3.8315
TNIK	-0.593332	7.99543	-4.84313	4.24529e-06	4.61958e-05	3.8274
APOL2	0.76836	7.21709	4.84233	4.25932e-06	4.63262e-05	3.82425
IGKV1-13	1.43432	9.72178	4.84034	4.29461e-06	4.66877e-05	3.81638
IFI44	1.08038	5.90215	4.83782	4.33959e-06	4.71541e-05	3.80643
CARD11	0.766404	7.09364	4.83577	4.37656e-06	4.75103e-05	3.79833
SRM	0.618246	9.63172	4.83477	4.3948e-06	4.76856e-05	3.79436
STPG1	-0.699415	7.03301	-4.83305	4.4261e-06	4.79564e-05	3.78759
SRGAP2	0.680113	7.61088	4.83279	4.43098e-06	4.79636e-05	3.78653
ANXA6	1.09937	9.61135	4.8316	4.45282e-06	4.81541e-05	3.78184
RRM2	0.960887	7.42499	4.83127	4.45889e-06	4.81738e-05	3.78054
PLCB1	0.828586	6.90221	4.83094	4.46493e-06	4.82161e-05	3.77925
ELL3	-0.583308	6.60501	-4.82959	4.48984e-06	4.84391e-05	3.77394
HPGD	-1.32572	10.1124	-4.82695	4.53918e-06	4.89017e-05	3.7635
BST2	1.05934	7.16962	4.82666	4.54459e-06	4.89367e-05	3.76237
COL4A2	1.15867	8.45248	4.82481	4.57948e-06	4.92175e-05	3.75507
KDR	1.36304	7.77802	4.82194	4.63419e-06	4.97366e-05	3.74373
SAMD9L	1.17578	9.69072	4.82174	4.63807e-06	4.97547e-05	3.74293
ZNF675	-0.802514	6.98611	-4.82126	4.64711e-06	4.98187e-05	3.74107
CD5	0.704628	7.552	4.81751	4.71964e-06	5.04391e-05	3.72629
ODC1	0.893194	10.3267	4.81591	4.75109e-06	5.07274e-05	3.71995
TSPAN5	0.66004	6.9206	4.81499	4.76903e-06	5.08712e-05	3.71636
PALMD	0.961444	6.40296	4.81311	4.80623e-06	5.11874e-05	3.70894
NDUFB3	-0.625643	7.1801	-4.81244	4.81949e-06	5.12638e-05	3.70631
NR1H4	-1.24333	4.96732	-4.81167	4.83478e-06	5.13554e-05	3.70329
PPP1R36	-0.695216	6.26234	-4.81134	4.84149e-06	5.13786e-05	3.70197
SPNS2	0.920931	8.9902	4.81047	4.8589e-06	5.15152e-05	3.69854
LOC344887	-1.09778	7.2066	-4.80685	4.93202e-06	5.2193e-05	3.68429
ADHFE1	-0.621062	5.82591	-4.80196	5.03242e-06	5.31564e-05	3.66506
MYEOV	0.943334	7.89562	4.79917	5.09048e-06	5.37447e-05	3.65411
P2RY8	1.0886	6.87097	4.79855	5.10357e-06	5.38578e-05	3.65166
PRKACB	-0.713418	9.30633	-4.79783	5.1187e-06	5.39924e-05	3.64884
THRA	-0.596634	8.52246	-4.79651	5.14675e-06	5.41876e-05	3.64362
HLA-DMB	0.952846	9.19365	4.79161	5.25159e-06	5.52227e-05	3.62438
ICOS	1.14216	5.87163	4.79127	5.25888e-06	5.52401e-05	3.62306
ALPL	1.55756	7.80794	4.79072	5.27079e-06	5.53397e-05	3.6209
RBMS1	1.02197	7.69368	4.79021	5.28189e-06	5.5405e-05	3.61889
TRIM16L	0.649771	8.52252	4.79003	5.28586e-06	5.5421e-05	3.61818
RFTN1	0.959448	7.69146	4.7894	5.29961e-06	5.55156e-05	3.6157
PYROXD1	-0.665545	8.57155	-4.78917	5.30448e-06	5.55156e-05	3.61482
SCARA3	0.605668	7.6895	4.78917	5.30467e-06	5.55156e-05	3.61479
RNY4P19	0.617129	6.84412	4.78517	5.39266e-06	5.63846e-05	3.59909
RAB23	0.696388	6.689	4.78381	5.42272e-06	5.66207e-05	3.59379
SORD	0.771328	8.89085	4.78146	5.47536e-06	5.71178e-05	3.58457
IGKV2D-28	1.39953	12.6024	4.77743	5.56694e-06	5.79135e-05	3.56875
PXDN	1.43371	8.56224	4.77023	5.73401e-06	5.93525e-05	3.54055
CMBL	-1.11991	9.24466	-4.76615	5.83076e-06	6.02168e-05	3.52459
MPC1	-0.676821	9.77571	-4.76573	5.84088e-06	6.02938e-05	3.52293
IGHV3OR16-8	1.29788	9.75125	4.76497	5.85914e-06	6.04274e-05	3.51996
HLA-DQB2	0.625497	7.99801	4.76437	5.87359e-06	6.05215e-05	3.51761
NNMT	1.23206	8.21564	4.76234	5.92256e-06	6.09492e-05	3.50969
FERMT2	1.10657	7.2525	4.76232	5.92315e-06	6.09492e-05	3.50959
PTPRC	1.57414	8.48345	4.75904	6.00328e-06	6.16898e-05	3.49678
EHD2	0.695211	8.33298	4.75699	6.05398e-06	6.21265e-05	3.48876
ARHGAP31	0.74301	7.73559	4.75589	6.08143e-06	6.23799e-05	3.48445
CSF2RB	1.24974	8.26386	4.75507	6.10191e-06	6.25618e-05	3.48124
IMPA2	-0.663852	7.36784	-4.7544	6.1187e-06	6.27056e-05	3.47862
EPB41L4A	0.613349	7.70699	4.75206	6.17754e-06	6.31945e-05	3.46949
CADM1	0.700412	6.90025	4.74778	6.28684e-06	6.4197e-05	3.45277
IGKV2D-40	3.23464	7.16631	4.7411	6.46102e-06	6.57686e-05	3.42671
CD2	0.728572	7.05852	4.73765	6.55297e-06	6.64959e-05	3.41324
FRY	0.671691	6.98346	4.73394	6.65309e-06	6.73614e-05	3.39879
ATP2B4	0.713924	8.32341	4.73152	6.71905e-06	6.79687e-05	3.38938
MAOA	-1.33121	8.72457	-4.72818	6.8114e-06	6.87497e-05	3.37637
TRIM16	0.655377	8.75901	4.72804	6.81545e-06	6.876e-05	3.3758
FAM65A	0.68479	7.51059	4.72504	6.89928e-06	6.94207e-05	3.36415
IL23R	-0.67213	5.41985	-4.72318	6.95201e-06	6.98894e-05	3.35689
ART3	0.900282	5.35783	4.71976	7.04971e-06	7.07463e-05	3.34359
COL6A2	0.727001	9.23443	4.71768	7.1096e-06	7.12844e-05	3.33553
ATP9A	-0.782414	8.93691	-4.71608	7.15613e-06	7.16244e-05	3.32931
NFE2L3	0.585629	7.95495	4.71479	7.194e-06	7.19717e-05	3.32428
IFI30	1.0809	10.0534	4.71349	7.23234e-06	7.22916e-05	3.31921
NR4A1	1.16812	8.14967	4.71083	7.31112e-06	7.28866e-05	3.30889
EDNRA	1.64219	7.29379	4.71024	7.32862e-06	7.30289e-05	3.30661
RN7SKP103	-0.59488	5.92037	-4.70768	7.40534e-06	7.36964e-05	3.29669
PTGR2	-0.582515	6.70987	-4.70748	7.41138e-06	7.37242e-05	3.29591
CEP70	-0.690278	6.54649	-4.70595	7.4579e-06	7.4122e-05	3.28995
SLC39A6	0.671862	7.61624	4.70571	7.46514e-06	7.4144e-05	3.28902
KLF7	1.0078	8.02777	4.70566	7.46663e-06	7.4144e-05	3.28883
GPR116	1.32611	7.0622	4.70523	7.47962e-06	7.42405e-05	3.28718
FMNL3	0.873823	7.34222	4.70498	7.48742e-06	7.42735e-05	3.28618
HLA-DRB5	1.68006	8.45842	4.70491	7.48949e-06	7.42735e-05	3.28592
PDE5A	-0.742734	7.7093	-4.70327	7.53975e-06	7.4724e-05	3.27955
OTC	-0.888918	5.07608	-4.70278	7.55467e-06	7.48219e-05	3.27766
E2F5	0.666882	7.87573	4.70085	7.6142e-06	7.52801e-05	3.27018
DDC	-0.937878	7.90699	-4.7007	7.61896e-06	7.52944e-05	3.26959
LGALSL	-0.620615	9.44976	-4.69952	7.65581e-06	7.56257e-05	3.26499
EVI2B	1.34886	9.52763	4.69805	7.70153e-06	7.60301e-05	3.25932
RNF125	-0.783522	7.86943	-4.69482	7.80361e-06	7.68859e-05	3.24677
MMP9	1.83067	8.57664	4.69481	7.8037e-06	7.68859e-05	3.24676
CARD8	0.718217	7.50136	4.69279	7.86809e-06	7.74867e-05	3.23893
MUC5B	1.28541	10.7909	4.68981	7.96415e-06	7.8263e-05	3.22737
SNORA24	0.915662	10.3633	4.68913	7.98603e-06	7.84441e-05	3.22476
PMFBP1	-0.648433	5.75706	-4.68762	8.03532e-06	7.886e-05	3.2189
FGFR1	0.58676	7.16716	4.68691	8.05836e-06	7.90179e-05	3.21617
RBP2	-0.640819	5.80563	-4.68573	8.09731e-06	7.93313e-05	3.21157
TFPI	1.30384	6.67974	4.68539	8.10824e-06	7.94041e-05	3.21029
LRRC32	0.713321	7.73171	4.68488	8.12526e-06	7.95365e-05	3.20829
FAR2	-0.626799	8.94594	-4.68102	8.25373e-06	8.0551e-05	3.19335
RN7SL473P	1.00604	7.65579	4.67673	8.39859e-06	8.1754e-05	3.17677
MPC2	-0.591873	9.73428	-4.67474	8.4666e-06	8.23348e-05	3.16909
IGHV1OR15-1	2.56498	9.15406	4.67462	8.47088e-06	8.23348e-05	3.16861
GULP1	-0.856796	6.35922	-4.67441	8.47803e-06	8.23507e-05	3.16781
LAMA4	1.07917	8.02365	4.67243	8.54653e-06	8.29806e-05	3.16014
EML1	0.827686	6.8862	4.67189	8.56523e-06	8.31267e-05	3.15806
LAX1	1.57619	7.57213	4.67048	8.61416e-06	8.34945e-05	3.15264
EFEMP2	0.690725	7.60382	4.67031	8.62004e-06	8.35158e-05	3.15199
SIK1	1.09891	8.00897	4.66944	8.65076e-06	8.37778e-05	3.1486
ZNF493	-0.604946	6.51388	-4.66836	8.6886e-06	8.40725e-05	3.14444
C6orf222	-0.749273	7.10758	-4.66372	8.85362e-06	8.54495e-05	3.12652
SLC6A9	-0.61664	8.27474	-4.66166	8.92781e-06	8.5993e-05	3.11858
FBXO34	-0.6316	9.05238	-4.65945	9.00806e-06	8.66835e-05	3.11005
HOOK1	-0.949471	7.95934	-4.65787	9.06577e-06	8.7165e-05	3.10397
CEP135	0.609697	6.516	4.65721	9.09017e-06	8.73626e-05	3.10141
XAF1	0.991196	8.50462	4.65695	9.09948e-06	8.7415e-05	3.10044
MSC	0.959628	6.95397	4.65592	9.13762e-06	8.77072e-05	3.09646
ACADSB	-0.838224	7.35502	-4.65543	9.15579e-06	8.78075e-05	3.09456
BDH1	-1.01332	8.17385	-4.65523	9.16311e-06	8.78406e-05	3.0938
GIMAP2	0.60059	6.7131	4.65129	9.31029e-06	8.90634e-05	3.07863
KPNA2	0.759139	9.82284	4.65059	9.33688e-06	8.92426e-05	3.07592
PKIA	0.607289	6.11275	4.64984	9.36509e-06	8.93994e-05	3.07304
GIMAP8	0.628207	6.69864	4.64912	9.39259e-06	8.96243e-05	3.07025
SMAP2	0.832744	9.26558	4.64843	9.41865e-06	8.98351e-05	3.06761
CXCL16	0.609289	8.664	4.6464	9.49644e-06	9.0501e-05	3.05978
HLA-DQA1	1.31399	11.3898	4.64241	9.65056e-06	9.18119e-05	3.04445
RNU5A-8P	1.23899	6.12798	4.64192	9.66963e-06	9.19202e-05	3.04258
SLC43A3	1.09653	8.41503	4.64086	9.71147e-06	9.22793e-05	3.03846
TNFAIP8	0.732012	7.18798	4.63935	9.77069e-06	9.27256e-05	3.03268
CAMK2D	-0.605678	9.03567	-4.63814	9.81862e-06	9.30798e-05	3.02802
CITED2	-0.598143	9.55085	-4.63763	9.83888e-06	9.32169e-05	3.02606
ACSL4	1.79664	7.93853	4.63687	9.86898e-06	9.34507e-05	3.02315
FKBP10	1.08272	8.01047	4.63633	9.8906e-06	9.35898e-05	3.02107
RAMP2	0.677154	7.20933	4.63604	9.90198e-06	9.36252e-05	3.01997
ARHGEF9	-0.775595	8.12734	-4.63565	9.91784e-06	9.36914e-05	3.01845
LSAMP	0.789951	6.81505	4.63495	9.94587e-06	9.38391e-05	3.01576
SLCO3A1	0.753878	8.39531	4.63279	1.00329e-05	9.45424e-05	3.00747
RHOH	1.37066	7.6325	4.63159	1.00817e-05	9.48582e-05	3.00285
C11orf54	-0.685209	8.75355	-4.63155	1.00831e-05	9.48582e-05	3.00271
NT5DC2	0.752284	8.36843	4.63134	1.00916e-05	9.48824e-05	3.00191
PCDH17	0.934238	7.31893	4.62743	1.02521e-05	9.61297e-05	2.98689
IGKV1D-43	1.77182	11.2992	4.6262	1.0303e-05	9.65273e-05	2.98218
NAALADL2	-0.920697	6.84763	-4.62561	1.03279e-05	9.67199e-05	2.97989
LMCD1	0.614328	7.65024	4.6253	1.03407e-05	9.67998e-05	2.97871
SLC7A2	0.769292	6.68646	4.62324	1.04268e-05	9.74458e-05	2.97081
PCK2	-0.747647	8.63545	-4.62255	1.04559e-05	9.7677e-05	2.96816
MAP4K4	0.738756	7.85436	4.61779	1.06584e-05	9.93622e-05	2.9499
MBNL3	-0.591779	8.75543	-4.61149	1.0932e-05	0.000101706	2.92579
MMRN2	0.631019	6.8435	4.60859	1.10603e-05	0.000102689	2.91469
CD79A	1.83316	9.28599	4.60392	1.127e-05	0.000104509	2.89681
CENPV	-0.75255	8.17156	-4.60326	1.12999e-05	0.0001047	2.89429
GPR137B	0.738193	8.70728	4.60143	1.13834e-05	0.000105249	2.88728
LOC102724453	1.40753	12.3427	4.60064	1.14195e-05	0.000105507	2.88427
EBF1	0.969904	7.16651	4.59706	1.15851e-05	0.000106733	2.87058
KLHL5	1.43741	6.94846	4.59686	1.15943e-05	0.000106775	2.86982
RN7SKP35	-0.895412	5.5935	-4.5967	1.1602e-05	0.000106803	2.86919
HCLS1	1.07702	7.57018	4.59579	1.16443e-05	0.000107083	2.86573
FLI1	1.04334	7.38615	4.59574	1.16466e-05	0.000107083	2.86554
DNAJB9	0.823075	8.18538	4.59447	1.17061e-05	0.000107586	2.86069
ITGB2	1.13361	8.47522	4.59313	1.17693e-05	0.000108079	2.85557
SLC46A1	-0.703316	7.78363	-4.59136	1.18535e-05	0.000108721	2.84879
COBL	-0.807614	7.60438	-4.58904	1.19641e-05	0.000109558	2.83995
NID2	0.844939	7.79599	4.58216	1.2299e-05	0.000112308	2.81369
TMEM109	0.592535	9.51174	4.57979	1.24161e-05	0.000113241	2.80468
GIPC2	-0.937316	8.33751	-4.57779	1.2516e-05	0.000114106	2.79706
SGIP1	0.829193	6.20798	4.57591	1.2611e-05	0.000114926	2.78986
PREX1	0.958225	8.04928	4.57428	1.26933e-05	0.000115584	2.78368
LRRC8C	0.675087	7.1274	4.57171	1.28245e-05	0.000116638	2.7739
SPTLC3	-0.765567	6.97383	-4.56758	1.30387e-05	0.000118396	2.75815
CD226	0.796831	6.01689	4.56689	1.30744e-05	0.000118673	2.75555
IGHV1OR15-9	0.688193	6.91831	4.56307	1.32761e-05	0.000120407	2.74099
KIF16B	-0.643264	8.10372	-4.55953	1.34651e-05	0.000121976	2.72755
HIST1H4C	0.648776	9.82933	4.55901	1.34932e-05	0.000122084	2.72557
RNA5SP260	-0.666493	7.5865	-4.55665	1.36208e-05	0.000122945	2.71662
ADM	1.0413	9.60022	4.55617	1.36471e-05	0.000123084	2.71479
EDN3	-1.03113	8.52896	-4.55484	1.37196e-05	0.000123688	2.70975
OAS3	0.76618	8.07121	4.55353	1.3792e-05	0.000124194	2.70474
PDGFRB	1.25486	8.0065	4.55298	1.38219e-05	0.000124413	2.70269
RN7SL386P	-0.608701	4.91572	-4.55029	1.39715e-05	0.00012566	2.69245
BDKRB1	-0.680104	7.74363	-4.54954	1.40134e-05	0.000125938	2.6896
KCNN3	0.758796	7.13528	4.54904	1.40413e-05	0.000126038	2.68772
SPATS2	0.641219	8.1736	4.54726	1.41415e-05	0.000126788	2.68095
CTLA4	0.91474	6.1042	4.54716	1.41471e-05	0.000126788	2.68058
SLC52A3	-0.641178	8.06174	-4.54449	1.42982e-05	0.000127991	2.67048
DYSF	1.31164	6.98034	4.54421	1.43144e-05	0.000128085	2.6694
UNC5CL	0.95105	6.64935	4.54321	1.43718e-05	0.000128548	2.6656
HTRA1	0.630923	8.46576	4.5426	1.44065e-05	0.000128808	2.66331
SLC16A7	0.620393	6.83641	4.54071	1.45154e-05	0.000129628	2.65615
ZNF814	-0.701549	6.53771	-4.53918	1.46044e-05	0.00013027	2.65033
NXPE3	1.03548	6.66396	4.53792	1.46781e-05	0.000130876	2.64555
CLEC1A	0.760957	5.70396	4.53704	1.47295e-05	0.00013118	2.64223
SNORA54	0.939577	7.8735	4.53521	1.48372e-05	0.000131942	2.63531
MX2	1.17782	7.17142	4.53459	1.48739e-05	0.000132206	2.63296
MS4A8	-1.27694	7.22305	-4.53412	1.4902e-05	0.000132352	2.63116
WWTR1	0.885727	7.79094	4.53335	1.49479e-05	0.000132656	2.62824
SACS	0.86828	6.21814	4.53199	1.50287e-05	0.000133269	2.62312
IL10RA	1.04327	8.08735	4.5302	1.51365e-05	0.000134173	2.61632
CCDC3	1.29	7.7565	4.52874	1.52248e-05	0.000134797	2.6108
ATM	0.878739	8.11984	4.52838	1.52463e-05	0.000134935	2.60945
FBN1	1.4518	7.65394	4.52733	1.53105e-05	0.000135398	2.60546
SNX10	0.998121	7.178	4.52695	1.53337e-05	0.00013555	2.60403
AKR1B10	-1.42822	8.55049	-4.52438	1.54912e-05	0.000136889	2.59431
CTDSPL	-0.739745	9.01049	-4.5193	1.58073e-05	0.000139249	2.57512
RNU6-701P	-0.603087	5.05559	-4.51759	1.59151e-05	0.000140144	2.56866
SCP2	-0.70637	8.83062	-4.51652	1.59826e-05	0.000140684	2.56464
CA2	-1.36245	10.3467	-4.5164	1.59907e-05	0.0001407	2.56416
TNFSF8	0.938916	7.37497	4.51605	1.60126e-05	0.000140839	2.56286
SLC39A5	-1.3845	9.13519	-4.51534	1.60582e-05	0.000141131	2.56016
TTC28	0.602872	6.71601	4.51365	1.61659e-05	0.000141912	2.55381
CLEC14A	0.719942	6.952	4.51059	1.63639e-05	0.000143429	2.54224
ZNF124	-0.772951	6.83382	-4.5097	1.64218e-05	0.000143881	2.53888
PON3	-0.838657	6.60636	-4.50853	1.64981e-05	0.000144419	2.53448
GM2A	0.675456	9.42463	4.50837	1.65086e-05	0.000144419	2.53387
NR5A2	-0.778399	9.25557	-4.50768	1.65542e-05	0.000144706	2.53125
IGKV1D-42	1.10039	13.0205	4.5065	1.66315e-05	0.00014527	2.52683
TIE1	0.685647	6.89855	4.50469	1.67518e-05	0.000146152	2.51998
JAZF1	0.584135	6.90665	4.50394	1.68015e-05	0.000146529	2.51717
RNF24	0.658551	7.79443	4.5017	1.69518e-05	0.000147613	2.50871
BCL6B	0.599144	7.1864	4.50113	1.69897e-05	0.00014783	2.50658
REG1A	3.56902	8.95936	4.50044	1.70368e-05	0.000148069	2.50396
CYTH4	1.12994	7.96057	4.49968	1.70878e-05	0.000148456	2.50112
FCGRT	-0.619053	9.26847	-4.4992	1.71202e-05	0.000148681	2.49932
LAPTM5	1.26827	10.1294	4.49307	1.75414e-05	0.000151816	2.47624
SAA2-SAA4	1.21291	5.86964	4.49265	1.75705e-05	0.00015201	2.47466
CLDN2	0.582361	6.56384	4.49173	1.76346e-05	0.000152449	2.4712
CPNE2	-0.64867	9.67364	-4.49047	1.77228e-05	0.000153094	2.46646
ZNF43	-0.710489	6.31952	-4.48829	1.7877e-05	0.00015425	2.45824
ARHGAP25	0.927484	7.01492	4.48786	1.79071e-05	0.000154452	2.45663
ABCA13	0.640934	5.96025	4.48715	1.79579e-05	0.000154783	2.45395
TIMP3	0.868662	7.73365	4.48713	1.79592e-05	0.000154783	2.45388
GLCCI1	1.04507	8.56475	4.48111	1.83922e-05	0.000158154	2.43126
RAB34	0.633665	7.03552	4.48071	1.8421e-05	0.000158343	2.42977
TMEM144	-0.912992	7.64546	-4.47859	1.85761e-05	0.00015932	2.42181
NOS2P3	0.673972	8.80104	4.47858	1.85768e-05	0.00015932	2.42177
GPR126	1.44723	8.91789	4.47753	1.8654e-05	0.000159801	2.41783
PARP14	0.868297	9.28879	4.47673	1.87129e-05	0.000160185	2.41484
ITGAL	0.924491	7.67913	4.47559	1.87978e-05	0.000160729	2.41054
EMP3	0.963368	8.44983	4.4748	1.88565e-05	0.000161131	2.40758
LGALS1	0.857558	10.1377	4.47292	1.89973e-05	0.000161862	2.40052
PLEK	2.07848	7.66146	4.4729	1.89986e-05	0.000161862	2.40045
SLC16A4	1.1168	6.50656	4.47156	1.90995e-05	0.000162575	2.39542
FMNL1	0.845707	7.90161	4.47136	1.91145e-05	0.000162621	2.39468
MZB1	1.41201	8.62979	4.46873	1.93142e-05	0.000164095	2.38481
LRRC75A	-0.8532	8.89269	-4.46828	1.93487e-05	0.000164326	2.38312
PTK6	-0.620676	8.97512	-4.46799	1.93702e-05	0.000164448	2.38206
MYCT1	0.821559	6.18553	4.4666	1.94771e-05	0.000165191	2.37684
COL5A1	0.62635	7.65737	4.46657	1.94796e-05	0.000165191	2.37671
SNX2	-0.674523	9.47609	-4.46601	1.95224e-05	0.000165431	2.37463
IRAK2	0.810718	7.27026	4.46476	1.96194e-05	0.000166129	2.36992
MT-TL2	-1.02046	10.5895	-4.46183	1.98472e-05	0.000167682	2.35897
MYBL2	0.728091	8.19741	4.4592	2.00542e-05	0.000169175	2.34912
GMPR	0.847661	7.49001	4.45911	2.00612e-05	0.000169175	2.34879
SLC1A4	0.744522	8.15235	4.45778	2.01669e-05	0.000170004	2.3438
TP53INP2	-0.63376	9.18928	-4.45305	2.0546e-05	0.000172943	2.32612
RAB31	1.29363	9.69228	4.45246	2.0594e-05	0.000173177	2.32391
ERO1LB	0.730133	6.05366	4.4505	2.07535e-05	0.000174371	2.31659
NR4A3	1.04272	6.77066	4.4505	2.0754e-05	0.000174371	2.31656
MS4A12	-2.41739	10.3327	-4.44751	2.09999e-05	0.000176241	2.30538
FCGR3A	1.41728	7.22088	4.44713	2.10308e-05	0.000176435	2.30399
HNF4G	-1.09165	8.47993	-4.4466	2.10751e-05	0.000176741	2.30199
BCL2L14	-0.580461	7.22563	-4.44491	2.1216e-05	0.000177857	2.29567
COL3A1	1.30553	9.73532	4.44362	2.13237e-05	0.000178694	2.29086
AQP9	2.66624	7.43348	4.44304	2.13725e-05	0.000178971	2.28869
PLSCR4	-0.581349	7.81189	-4.44124	2.15241e-05	0.000180108	2.28198
IGLV6-57	1.82956	8.76594	4.44064	2.15753e-05	0.000180469	2.27973
MMP2	1.57856	9.38296	4.43634	2.19432e-05	0.000182884	2.26369
NUP210	0.701229	8.17739	4.43632	2.19444e-05	0.000182884	2.26363
IGKV1OR2-108	0.99368	7.55036	4.43554	2.20123e-05	0.000183129	2.2607
GZMB	0.723826	6.97422	4.43551	2.20142e-05	0.000183129	2.26062
GPX7	0.948358	8.15257	4.43353	2.21865e-05	0.00018436	2.25322
TIPARP	0.591704	8.98659	4.43319	2.22166e-05	0.000184542	2.25194
CPEB4	0.711052	8.58069	4.42948	2.25421e-05	0.000186973	2.23813
STX2	0.755628	7.04186	4.42809	2.26662e-05	0.000187594	2.23293
AKR7L	-0.584795	6.82192	-4.42513	2.2931e-05	0.000189506	2.22191
VIPR1	-1.30874	8.70116	-4.42475	2.29646e-05	0.000189715	2.22052
RECQL	0.712716	6.87225	4.42428	2.30075e-05	0.00019	2.21875
ELMO1	1.10367	8.16593	4.42114	2.32922e-05	0.000192142	2.20708
BCL6	1.20249	7.58374	4.41792	2.35881e-05	0.000194159	2.19511
QKI	0.862424	7.12514	4.41746	2.36315e-05	0.000194446	2.19336
ZSWIM5	-0.70799	8.03458	-4.4172	2.36551e-05	0.00019457	2.19242
EMR2	1.39271	7.7536	4.41698	2.36756e-05	0.000194668	2.19159
IL1A	1.84157	6.54079	4.41623	2.37451e-05	0.000194957	2.18881
TRPM4	-0.707162	8.82475	-4.41482	2.38768e-05	0.000195968	2.18357
COL12A1	1.85979	8.26002	4.41393	2.396e-05	0.000196508	2.18027
LRG1	0.601383	8.07035	4.41357	2.39941e-05	0.000196623	2.17892
RASGRP1	0.964348	7.23333	4.41258	2.40878e-05	0.000197272	2.17522
RN7SL769P	0.614184	9.08383	4.41232	2.41125e-05	0.000197402	2.17425
GYPC	0.750089	7.60758	4.41071	2.42645e-05	0.000198432	2.16829
CHAC1	0.867779	7.52725	4.40857	2.44692e-05	0.000199638	2.16032
PRRX1	1.45803	7.31627	4.40852	2.44735e-05	0.000199638	2.16016
PTP4A1P7	-0.608715	8.07953	-4.40781	2.45414e-05	0.00020012	2.15753
PARP9	0.993972	8.20124	4.40658	2.46597e-05	0.000200941	2.15297
MIR200C	-0.795756	6.71509	-4.40546	2.47686e-05	0.000201756	2.14879
SKIL	0.675165	8.33088	4.40357	2.49521e-05	0.000203032	2.14179
TFF1	1.38337	10.5277	4.40221	2.50857e-05	0.000203973	2.13673
FGF2	0.945681	7.78442	4.39797	2.55049e-05	0.000206789	2.12101
AEBP1	0.770544	8.52713	4.39781	2.55209e-05	0.000206804	2.12041
PBX1	-0.649687	8.5053	-4.39585	2.57176e-05	0.000207994	2.11314
MIR192	-1.13898	7.91847	-4.39412	2.58913e-05	0.000209105	2.10675
S100B	0.661166	6.13108	4.39222	2.60848e-05	0.000210514	2.09969
AHNAK2	0.868676	6.64052	4.39138	2.61705e-05	0.00021113	2.09658
TRPS1	1.02756	6.80603	4.39074	2.62361e-05	0.000211584	2.09421
TSPAN11	0.836757	7.71845	4.38845	2.6472e-05	0.00021326	2.08572
REG3A	3.13291	7.7021	4.38822	2.64959e-05	0.000213376	2.08487
MRC2	0.694144	7.91198	4.38576	2.67512e-05	0.000215127	2.07578
TPK1	0.905385	7.14815	4.38414	2.69203e-05	0.000216147	2.0698
BTNL8	-1.27362	8.76127	-4.38068	2.72865e-05	0.000218742	2.057
ADAMTSL1	-0.614272	6.15336	-4.38067	2.72874e-05	0.000218742	2.05696
TMEM45A	1.0976	5.87514	4.38013	2.73449e-05	0.000219049	2.05497
MR1	0.626627	7.15416	4.37915	2.74502e-05	0.000219737	2.05133
RGS1	1.37303	6.26929	4.37522	2.78735e-05	0.000222811	2.03682
SLC22A23	-0.792708	8.45829	-4.3744	2.79629e-05	0.00022329	2.03378
SECTM1	-0.840973	9.18126	-4.37362	2.80479e-05	0.000223891	2.03091
PRKCH	0.788355	8.2884	4.37016	2.8429e-05	0.000226693	2.01812
RARRES3	0.784764	8.90896	4.36992	2.84558e-05	0.000226748	2.01722
SHH	0.604842	8.26004	4.36954	2.8498e-05	0.000227004	2.01582
MFGE8	0.871413	8.61964	4.36904	2.85536e-05	0.000227315	2.01397
GAL3ST1	-0.584441	7.44859	-4.36271	2.92649e-05	0.000232461	1.99065
MFSD2A	0.808007	8.32054	4.35983	2.95948e-05	0.000234429	1.98003
THEMIS2	1.10536	7.8669	4.35952	2.96305e-05	0.000234627	1.97889
SCN9A	-0.82592	5.72489	-4.359	2.96909e-05	0.000234888	1.97696
CD80	1.07851	6.32592	4.35893	2.96993e-05	0.000234888	1.97669
LOC100508226	-0.678453	5.95008	-4.35888	2.97049e-05	0.000234888	1.97651
CSGALNACT2	0.978704	7.59079	4.35741	2.98743e-05	0.000236063	1.97112
SERPINB8	0.735684	8.45092	4.35709	2.99122e-05	0.000236198	1.96992
C1orf210	-1.04805	8.94316	-4.35668	2.99592e-05	0.000236487	1.96843
GALNT12	-1.14506	9.29821	-4.35506	3.01485e-05	0.000237675	1.96247
APCDD1	0.741033	8.15849	4.3542	3.02502e-05	0.00023837	1.95927
LGI2	0.698994	6.42557	4.3541	3.02619e-05	0.000238379	1.95891
DOCK11	1.01115	7.6321	4.35368	3.03115e-05	0.000238623	1.95736
NLRC5	0.588614	8.31842	4.35099	3.06293e-05	0.000240856	1.94747
FBXW7	0.686725	7.28728	4.34899	3.08686e-05	0.000242339	1.9401
RIMKLA	-0.686449	7.94392	-4.34885	3.08847e-05	0.00024236	1.93961
TM4SF5	-0.651076	7.80427	-4.34843	3.09356e-05	0.00024246	1.93805
HADH	-0.737936	8.98848	-4.34839	3.09401e-05	0.00024246	1.93791
CR1	1.53833	6.55905	4.34799	3.09887e-05	0.000242757	1.93642
FAM20C	0.75659	8.65184	4.34682	3.11296e-05	0.000243777	1.93212
NDRG2	-0.842068	9.45595	-4.34561	3.12764e-05	0.000244758	1.92767
GMFG	1.1324	8.06661	4.3455	3.12895e-05	0.000244776	1.92727
APOBEC3G	0.928483	6.7124	4.34456	3.14035e-05	0.000245499	1.92383
MMP10	1.74103	6.49775	4.34406	3.14651e-05	0.000245896	1.92197
THRB	-1.07406	7.17789	-4.34312	3.15798e-05	0.000246707	1.91852
GIMAP7	0.742748	7.07333	4.34073	3.18737e-05	0.00024849	1.90975
CLDN12	0.728506	10.1394	4.33838	3.21655e-05	0.000250503	1.90112
ECT2	0.717444	7.82181	4.33781	3.22372e-05	0.000250722	1.89901
PLEKHO1	0.58647	7.09785	4.33195	3.29767e-05	0.00025586	1.87752
TNFAIP2	0.933849	8.28634	4.33173	3.3006e-05	0.000255912	1.87668
PIP4K2A	0.661648	8.29463	4.33006	3.32194e-05	0.000256865	1.87058
CXCL8	2.35751	8.43987	4.32869	3.33958e-05	0.000258141	1.86556
BIRC3	1.47364	8.79162	4.32801	3.3484e-05	0.000258646	1.86307
CGN	-0.819921	8.36136	-4.32319	3.41144e-05	0.000262712	1.8454
COL6A1	0.921391	9.26512	4.32306	3.4132e-05	0.000262758	1.84491
CHN1	1.24394	6.55882	4.32246	3.42109e-05	0.000263119	1.84273
IL21R	0.67182	6.77677	4.32	3.45378e-05	0.000265433	1.83372
CD38	1.31137	7.94711	4.31775	3.48396e-05	0.000267209	1.82549
RAPGEF4	0.580485	6.33829	4.313	3.54852e-05	0.000271886	1.8081
RBMS3	0.677641	6.8233	4.311	3.57605e-05	0.000273651	1.80078
MGP	1.57003	7.40477	4.31098	3.57638e-05	0.000273651	1.8007
TFAP2C	0.715923	6.00171	4.31069	3.58039e-05	0.000273854	1.79964
SLAMF1	1.04659	6.1869	4.31061	3.58144e-05	0.000273854	1.79936
CYP3A4	-1.28153	4.93535	-4.31028	3.58603e-05	0.000274112	1.79815
PTCH2	0.698418	7.34923	4.31017	3.58755e-05	0.000274136	1.79774
VNN2	1.92093	6.54318	4.30813	3.61592e-05	0.000276211	1.79029
LAMP3	1.14741	7.64812	4.30716	3.62955e-05	0.000277159	1.78673
NFATC2	0.648534	7.88878	4.30698	3.63207e-05	0.000277258	1.78607
LRRC1	-0.720575	8.46283	-4.3068	3.63458e-05	0.000277356	1.78542
EGR3	0.755261	6.67282	4.3049	3.66125e-05	0.00027911	1.77849
FAM13A	-0.587951	7.837	-4.3022	3.69965e-05	0.000281565	1.76862
SLC4A11	0.596011	7.37392	4.3021	3.70097e-05	0.000281572	1.76828
CLMP	0.896171	7.395	4.29811	3.75849e-05	0.000285113	1.75368
SEMA4A	0.706831	7.5739	4.29808	3.75883e-05	0.000285113	1.7536
ITGA2	1.14259	9.84079	4.29455	3.81042e-05	0.000288545	1.74069
GRAMD1A	0.621839	8.26524	4.29418	3.81573e-05	0.000288754	1.73938
MYH10	0.621529	6.77388	4.29339	3.82739e-05	0.000289444	1.73649
GPCPD1	0.604898	8.47149	4.29201	3.84786e-05	0.000290702	1.73144
C5orf30	-0.888715	8.51601	-4.29087	3.86471e-05	0.000291393	1.72731
SYTL4	-0.583742	7.24075	-4.28998	3.87795e-05	0.000292197	1.72407
LCP2	1.25806	8.70832	4.28877	3.89605e-05	0.000293269	1.71966
MAGI3	-0.651674	8.20061	-4.28868	3.89741e-05	0.000293274	1.71933
CNNM4	-0.84732	9.77866	-4.28605	3.93712e-05	0.000295871	1.70974
CD200	0.695313	7.81294	4.28125	4.01049e-05	0.000300489	1.69227
KRT7	0.869722	7.64523	4.27883	4.04798e-05	0.0003024	1.68346
ITGAX	1.39596	7.85645	4.27711	4.07487e-05	0.000304309	1.6772
CD177	-1.92305	10.6463	-4.27455	4.11514e-05	0.000306711	1.66789
PXMP2	-0.720311	8.26736	-4.27438	4.11776e-05	0.000306806	1.66729
PCDH20	-1.1829	6.74212	-4.27335	4.13413e-05	0.000307823	1.66354
HRCT1	-0.801205	7.70395	-4.27093	4.17272e-05	0.000310188	1.65475
DSE	0.996796	7.43382	4.27069	4.17664e-05	0.000310378	1.65386
MAP4K1	0.702686	6.95235	4.27042	4.18088e-05	0.00031049	1.6529
HTR4	-0.928791	7.09445	-4.26829	4.21516e-05	0.000312729	1.64518
BATF2	0.686256	8.45042	4.26786	4.22224e-05	0.000313149	1.64359
FCRL5	1.54644	7.12328	4.26777	4.22358e-05	0.000313149	1.64329
CLDN8	-2.85901	6.23235	-4.267	4.23616e-05	0.000313877	1.64048
TOM1L1	-0.630645	7.67214	-4.26495	4.26961e-05	0.000315657	1.63304
ANKRD20A3	-0.678615	6.31401	-4.26487	4.2709e-05	0.000315657	1.63275
MME	1.4151	7.04006	4.26477	4.27249e-05	0.000315657	1.6324
SLCO1B3	2.21907	5.95488	4.26379	4.28857e-05	0.000316726	1.62884
SELL	1.81061	7.69812	4.26338	4.29536e-05	0.000317002	1.62735
SHCBP1	0.751509	6.99195	4.2628	4.30493e-05	0.000317349	1.62524
MASP1	0.839175	6.33556	4.26273	4.30615e-05	0.000317349	1.62498
CCR6	0.666136	6.19094	4.26269	4.30678e-05	0.000317349	1.62484
HLA-DOB	1.06071	6.74187	4.26233	4.3127e-05	0.000317682	1.62354
NUDT12	-0.769419	7.26105	-4.2563	4.4136e-05	0.000324588	1.60166
GVINP1	0.836799	6.68469	4.25342	4.46254e-05	0.00032734	1.59123
PPP1R18	0.697505	7.71662	4.25186	4.48916e-05	0.00032908	1.58561
ARHGAP24	0.609635	6.54158	4.25071	4.50905e-05	0.000330285	1.58143
TMEM154	1.09218	7.48641	4.24985	4.52397e-05	0.000331203	1.57831
EPC1	0.674255	9.6426	4.24899	4.53888e-05	0.000332188	1.5752
THSD7A	0.599812	6.12877	4.24615	4.58837e-05	0.000335594	1.56494
JAM3	0.705848	7.17332	4.2457	4.59632e-05	0.000335898	1.5633
FAM160A1	-0.877217	8.24161	-4.24564	4.59744e-05	0.000335898	1.56307
ALDH1A2	1.06997	6.64641	4.2439	4.62815e-05	0.000337851	1.55678
FABP1	-1.36811	9.80211	-4.2413	4.6743e-05	0.000340563	1.5474
WNT5A	1.57099	7.21757	4.24119	4.67625e-05	0.000340596	1.547
MT2A	-0.637162	12.1695	-4.23735	4.74545e-05	0.000345193	1.53311
KIAA0040	0.697988	8.45034	4.23628	4.76487e-05	0.000346273	1.52925
HOXB6	-0.630496	7.64339	-4.23521	4.7843e-05	0.000347351	1.52541
CYTIP	1.39408	7.98025	4.235	4.78814e-05	0.000347519	1.52465
GDPD2	-0.889137	6.50206	-4.23406	4.80547e-05	0.000348331	1.52123
SNORA8	0.650057	8.75776	4.23318	4.82162e-05	0.00034939	1.51806
SLC9A3	-1.45085	9.08948	-4.23175	4.84805e-05	0.000350746	1.51289
CD274	1.6432	6.82331	4.23128	4.85666e-05	0.000351257	1.51121
ARHGEF6	0.895716	7.06616	4.23078	4.86604e-05	0.000351713	1.50939
SLA	1.03288	7.06253	4.23072	4.86717e-05	0.000351713	1.50917
KLHL6	1.05652	8.0301	4.23056	4.87015e-05	0.000351785	1.50859
CD53	1.38756	9.28171	4.22991	4.88211e-05	0.000352406	1.50628
FN1	1.24045	9.4589	4.22984	4.8834e-05	0.000352406	1.50602
HGF	1.40562	6.68342	4.22957	4.88841e-05	0.000352543	1.50506
FMOD	0.783438	8.27976	4.22727	4.93153e-05	0.000354864	1.49676
PDE10A	0.731609	5.62965	4.2258	4.95928e-05	0.000356522	1.49145
DDIT4	0.996245	7.937	4.22305	5.01153e-05	0.000359709	1.48154
CD27	1.18453	8.35779	4.22014	5.06745e-05	0.000363149	1.47106
SRPX2	1.02143	7.30474	4.21921	5.08544e-05	0.000364323	1.46771
CMTM3	0.603665	7.90306	4.21889	5.0917e-05	0.000364656	1.46655
SLPI	0.970756	10.2465	4.21847	5.09988e-05	0.000365127	1.46503
GZMK	1.39206	6.37832	4.21796	5.10974e-05	0.000365603	1.4632
SLC4A4	-1.47406	9.91784	-4.21266	5.21389e-05	0.000372234	1.44414
IGKV1D-8	1.29772	7.03102	4.21114	5.2442e-05	0.000373927	1.43866
ITK	0.768879	6.83958	4.21084	5.2501e-05	0.000374231	1.4376
CA1	-2.40998	9.0942	-4.21047	5.25763e-05	0.00037465	1.43624
SELE	2.09001	6.88016	4.20697	5.32811e-05	0.000378958	1.42366
TCEA3	-1.05252	8.92778	-4.20557	5.3564e-05	0.000380732	1.41866
GBP5	1.70026	7.33357	4.20504	5.36727e-05	0.000381147	1.41674
SH3BP5	0.694025	7.06067	4.20316	5.40574e-05	0.000383519	1.40999
LNX2	-0.636759	9.37533	-4.2007	5.45655e-05	0.000386641	1.40116
SLC16A14	0.921696	7.82711	4.19499	5.57613e-05	0.000394007	1.38068
POU2AF1	1.06645	7.84387	4.19355	5.60672e-05	0.000395308	1.37551
MOP-1	0.600793	4.95189	4.19239	5.63138e-05	0.000396923	1.37137
DOCK8	1.05258	8.12951	4.19153	5.64978e-05	0.000397973	1.36828
GUCY1B3	0.953226	6.73057	4.1896	5.69132e-05	0.000400402	1.36136
NAP1L1	0.713282	8.55937	4.18913	5.70155e-05	0.000400874	1.35967
SATB2	-1.19462	10.3991	-4.18475	5.79707e-05	0.000406834	1.34398
HHEX	0.620225	7.14457	4.18179	5.86233e-05	0.000410779	1.3334
ADA	0.618451	7.46672	4.17955	5.9124e-05	0.00041365	1.32537
GREM1	1.52018	9.56982	4.17859	5.93404e-05	0.000414908	1.32192
MGAT4B	-0.613841	8.81622	-4.17812	5.94444e-05	0.000415507	1.32027
HDHD3	-0.64947	8.71301	-4.17733	5.96222e-05	0.000416525	1.31745
MST1L	-0.76378	6.97807	-4.17596	5.99343e-05	0.000418416	1.31252
KITLG	-0.600603	6.71907	-4.17134	6.09908e-05	0.000424747	1.29602
SAMSN1	1.14564	5.91597	4.17078	6.11184e-05	0.000425506	1.29405
MCTP1	1.12381	7.08228	4.16614	6.22018e-05	0.000432386	1.27746
IHH	-0.842691	8.37408	-4.1652	6.24224e-05	0.000433786	1.27412
MMP19	0.824123	6.98578	4.16481	6.25159e-05	0.000434303	1.2727
ANKRD22	0.970145	8.72458	4.16419	6.26621e-05	0.000435052	1.2705
LOC102725104	-0.676473	5.52347	-4.16219	6.31368e-05	0.000437679	1.26338
STX11	1.23154	7.97434	4.16134	6.33385e-05	0.000438676	1.26036
SPA17	-0.652704	8.4266	-4.16039	6.3568e-05	0.000439939	1.25695
TST	-0.807692	10.6853	-4.1578	6.4193e-05	0.000443377	1.24772
TM6SF2	-0.925341	7.43052	-4.15709	6.43641e-05	0.000444423	1.2452
CD180	1.57444	7.10501	4.15495	6.48872e-05	0.000447763	1.23756
FOSB	1.28285	7.64856	4.15485	6.49097e-05	0.000447782	1.23724
ENDOD1	-0.786399	8.98607	-4.15447	6.50043e-05	0.000448298	1.23586
AOAH	-0.703252	8.38034	-4.15293	6.53825e-05	0.000450597	1.23039
CES3	-1.07698	8.82129	-4.15135	6.57738e-05	0.000452781	1.22475
NFKBIA	0.696817	10.5002	4.14955	6.62208e-05	0.000455563	1.21836
BCAT2	-0.614575	7.85015	-4.14846	6.64938e-05	0.000457044	1.21448
CAPN13	-1.50996	6.95857	-4.14754	6.67244e-05	0.000458213	1.21121
ACSS2	-0.840177	9.59673	-4.14376	6.76821e-05	0.000463808	1.19776
TSPAN6	-0.916715	9.53244	-4.14088	6.84207e-05	0.000468445	1.18752
CCR4	0.69618	6.16512	4.14033	6.85617e-05	0.000469128	1.18558
SLC6A19	-1.32883	6.98812	-4.14012	6.86156e-05	0.000469356	1.18484
TIMP2	0.758499	9.31153	4.13588	6.97202e-05	0.000475479	1.16977
CD37	1.15325	8.25117	4.13314	7.04419e-05	0.000479995	1.16006
AGMO	-0.724524	4.73303	-4.13313	7.04458e-05	0.000479995	1.16
BEST2	-1.60627	7.55797	-4.1325	7.06124e-05	0.000480842	1.15778
CXCL10	2.25496	7.93196	4.13165	7.08375e-05	0.000482219	1.15477
IFI44L	1.19915	6.60846	4.129	7.15474e-05	0.000486334	1.14537
PLA1A	0.860911	6.70935	4.12887	7.15813e-05	0.000486418	1.14492
ACOT11	-0.611886	8.36688	-4.12622	7.2298e-05	0.000490116	1.13552
GLIPR1	1.37728	8.50891	4.1259	7.23862e-05	0.000490567	1.13437
DPYSL3	0.783954	7.8478	4.12524	7.25664e-05	0.000491348	1.13203
VCAN	1.36837	8.33645	4.12041	7.38942e-05	0.000499297	1.11492
CPXM1	0.793671	6.94231	4.12012	7.39736e-05	0.000499685	1.11391
CEMIP	1.87774	7.73591	4.11934	7.4191e-05	0.000501005	1.11114
AP1S3	0.659493	7.15499	4.11625	7.50551e-05	0.000506416	1.10022
ARHGAP15	1.02827	6.84517	4.11624	7.50592e-05	0.000506416	1.10017
NHSL1	-0.899898	8.90497	-4.11181	7.63142e-05	0.000514119	1.08454
SPG20	0.70887	6.25526	4.11106	7.65292e-05	0.000515109	1.08188
ZG16B	0.845086	9.89608	4.11076	7.66159e-05	0.00051554	1.08081
VIL1	-1.01288	9.90923	-4.11049	7.66951e-05	0.00051592	1.07984
KCNA3	1.18579	7.22404	4.10947	7.69885e-05	0.000517587	1.07624
OLFML2B	0.971243	6.56766	4.10682	7.77564e-05	0.000522286	1.06688
CA4	-1.31841	9.42629	-4.10646	7.786e-05	0.000522827	1.06563
LRRCC1	-0.618885	7.74671	-4.10314	7.88341e-05	0.000528454	1.0539
SP140	0.947915	6.9886	4.0994	7.99457e-05	0.000534934	1.0407
RN7SL600P	0.980414	7.23372	4.09868	8.01599e-05	0.000536052	1.03818
KCNJ2	-0.736024	8.00658	-4.09712	8.06315e-05	0.000538571	1.03265
SERPINB7	2.30821	6.40535	4.09647	8.08253e-05	0.000539548	1.03039
CR1L	0.765615	5.09394	4.09439	8.14562e-05	0.0005436	1.02306
GSTM4	-0.788187	8.90473	-4.09381	8.16358e-05	0.000544319	1.02098
FAM49A	1.0806	7.71337	4.09349	8.17334e-05	0.00054481	1.01986
CDHR1	-1.60856	7.67276	-4.09275	8.19575e-05	0.000545662	1.01728
SLC6A20	1.21355	7.90592	4.09204	8.21754e-05	0.000546953	1.01477
TNFSF13B	0.842592	7.1432	4.09168	8.22858e-05	0.000547527	1.01351
IGKV6-21	2.00677	8.39264	4.08857	8.32485e-05	0.000553035	1.00255
CES2	-0.929358	10.1205	-4.08853	8.32596e-05	0.000553035	1.00242
GHR	-1.35551	6.19724	-4.08831	8.33283e-05	0.000553329	1.00164
LOC101930405	1.17673	6.8891	4.08628	8.39633e-05	0.000557057	0.994487
MBOAT1	-0.691138	9.88117	-4.08614	8.40083e-05	0.000557193	0.993982
S100A9	1.68736	8.0778	4.08544	8.42275e-05	0.000558158	0.991526
MOGAT2	-1.2314	8.26092	-4.08521	8.43008e-05	0.00055848	0.990707
TLN2	-0.690493	7.82223	-4.08493	8.43866e-05	0.000558886	0.989748
IGKV1D-27	2.0677	9.57922	4.08351	8.48364e-05	0.000561537	0.984738
FAM65B	1.25587	7.01027	4.08246	8.51675e-05	0.0005634	0.981067
SLAMF6	1.24847	7.12052	4.08171	8.54067e-05	0.000564779	0.978424
PTP4A3	1.01218	8.37534	4.081	8.56347e-05	0.000565996	0.975912
RN7SL368P	1.45913	7.59703	4.08056	8.57748e-05	0.000566593	0.974371
LDLRAD3	0.684204	7.74041	4.08017	8.58983e-05	0.000567243	0.973016
NCKAP1L	1.0793	7.75943	4.07904	8.62611e-05	0.000569143	0.969044
IGKV2D-24	1.58423	10.2791	4.07867	8.63827e-05	0.00056978	0.967716
ST8SIA4	1.12422	6.83037	4.07737	8.6802e-05	0.000571881	0.963154
DERL3	0.934051	8.05554	4.07722	8.68485e-05	0.000572021	0.96265
TNFRSF9	1.12499	7.00228	4.07638	8.71217e-05	0.00057299	0.95969
SLC37A2	-1.28152	6.98724	-4.07473	8.76581e-05	0.000575851	0.953907
IL17RB	-0.67545	6.97379	-4.07361	8.80275e-05	0.000577994	0.949945
RND1	1.03775	7.38923	4.07143	8.87435e-05	0.000582139	0.942312
TSHZ3	0.588541	6.8463	4.071	8.88868e-05	0.000582742	0.940792
SPON2	0.784694	7.38646	4.069	8.95514e-05	0.000586592	0.933773
TXLNB	0.59147	5.49814	4.06631	9.04527e-05	0.000591813	0.924339
ENPP3	-0.956615	7.83742	-4.06414	9.11844e-05	0.000596085	0.91675
A2M	1.03966	10.4655	4.06363	9.13587e-05	0.000597052	0.914952
CSGALNACT1	0.947727	6.13651	4.06317	9.15157e-05	0.000597906	0.913334
WISP1	0.921471	7.33547	4.06128	9.21598e-05	0.000601422	0.906728
STX19	-0.917375	7.53694	-4.06012	9.25595e-05	0.000603857	0.902651
PRR5L	-0.797433	8.48729	-4.05985	9.26525e-05	0.00060429	0.901705
SERPINE1	1.6958	7.98063	4.05918	9.28846e-05	0.000605109	0.899349
ZDBF2	0.610567	5.58697	4.05738	9.35073e-05	0.000608642	0.893056
GJC1	0.765788	6.88073	4.05659	9.37808e-05	0.000610247	0.890305
MYO1A	-1.07725	9.38565	-4.05389	9.47276e-05	0.000615797	0.880844
CD3D	0.630631	7.34815	4.05261	9.518e-05	0.000617935	0.876358
STARD4	0.614363	8.0942	4.05195	9.54132e-05	0.000619273	0.874052
LUM	1.37804	9.44698	4.05032	9.59892e-05	0.0006223	0.868384
SEMA7A	0.867283	7.74538	4.04525	9.78132e-05	0.00063232	0.850659
STAP2	-0.912776	8.50666	-4.04378	9.83504e-05	0.000635069	0.845502
ANKRD20A8P	-0.637697	6.13863	-4.03899	0.000100112	0.000644426	0.828791
SYTL3	0.597432	6.38637	4.03789	0.000100521	0.000646693	0.824952
SPINK4	1.83368	9.66584	4.03464	0.000101739	0.000653787	0.813615
FCN3	1.02564	7.22501	4.03244	0.00010257	0.000658674	0.805957
TTC38	-0.586959	9.06925	-4.02922	0.0001038	0.000664136	0.794737
LRRC66	-1.00061	7.02769	-4.02756	0.000104438	0.000667013	0.788961
MOXD1	0.742813	6.06234	4.02529	0.000105318	0.000672226	0.781064
FZD5	-0.873982	9.471	-4.02517	0.000105366	0.000672342	0.780637
GJA5	0.701434	5.78813	4.02466	0.000105563	0.000673217	0.778885
IL1RAP	0.817642	6.63069	4.02373	0.000105928	0.00067517	0.77563
ZNF737	-0.6843	8.76101	-4.02347	0.00010603	0.000675493	0.774731
RASGRP3	1.17249	6.78187	4.01661	0.00010875	0.000689866	0.750887
LILRB2	1.08189	7.61139	4.00993	0.000111463	0.000704124	0.727704
PYHIN1	0.599721	6.28157	4.00818	0.000112184	0.000708032	0.721635
TNFRSF1B	0.676048	8.45562	4.00813	0.000112206	0.000708032	0.721451
CASP6	-0.652754	7.84096	-4.00276	0.000114451	0.00072082	0.702815
MX1	0.726815	7.77169	4.00274	0.000114459	0.00072082	0.702756
SYTL2	-1.05196	8.47075	-4.00267	0.000114487	0.00072082	0.702523
FLNA	0.898472	9.7095	4.00162	0.00011493	0.000722609	0.698888
FLVCR2	-0.629563	8.27536	-4.00018	0.000115541	0.000726251	0.693898
XYLB	-0.610827	7.71382	-3.99822	0.000116378	0.000730701	0.687111
CDK14	0.980355	7.21493	3.99804	0.000116456	0.00073099	0.68648
PFN2	-0.881007	7.77642	-3.99403	0.000118187	0.000740216	0.672606
OVOL1	-0.682914	8.17447	-3.98824	0.000120729	0.000754267	0.65259
NOTCH3	0.606326	7.82647	3.98482	0.000122256	0.000761708	0.640776
FUCA1	-0.759898	10.0252	-3.98317	0.000123003	0.000765526	0.635044
AKT3	1.01501	7.00913	3.98279	0.000123173	0.000766372	0.633747
PRR16	0.643688	6.1034	3.9826	0.000123257	0.000766475	0.633106
PSAT1	0.964169	6.86429	3.98005	0.000124417	0.000772418	0.624301
HNF1B	-0.830942	8.04747	-3.9784	0.000125175	0.000776914	0.618587
CLIC2	0.920174	6.40514	3.97697	0.000125831	0.000779916	0.613677
STOM	1.06615	9.61699	3.97454	0.000126958	0.000786048	0.605289
DNAJC15	-0.645043	9.36561	-3.97424	0.000127098	0.000786314	0.604252
SH3BGRL2	-0.887683	9.95282	-3.97423	0.000127105	0.000786314	0.604202
FBLN5	0.753752	7.6609	3.97243	0.000127946	0.000791087	0.598002
IFNAR2	0.81413	7.70016	3.97168	0.000128297	0.000792823	0.59543
CXCR1	1.7962	6.55712	3.97031	0.000128941	0.000795938	0.590721
GNB4	0.810389	6.98766	3.97003	0.000129076	0.000796554	0.589738
CYP2S1	-0.883694	9.19227	-3.96984	0.000129163	0.000796874	0.589105
RBMS1P1	1.2467	6.90669	3.96709	0.000130474	0.000804088	0.579614
CEP128	0.834875	6.87654	3.96578	0.000131102	0.000807298	0.575103
CCL22	0.698326	7.19204	3.96532	0.00013132	0.00080835	0.573537
ME1	1.17889	9.15559	3.96527	0.000131344	0.00080835	0.573364
CYP7B1	0.95283	7.40197	3.96415	0.000131886	0.000810145	0.5695
ASS1	0.779707	9.97254	3.96333	0.000132281	0.000812136	0.566689
GUCY1A3	1.17435	6.89242	3.96215	0.000132854	0.000815217	0.562623
PRLR	-1.22801	7.15206	-3.95968	0.000134062	0.000821075	0.554118
CAPN9	-1.03021	7.21975	-3.95783	0.000134969	0.000826183	0.547783
PDGFRA	0.89183	8.2157	3.95646	0.000135647	0.000830109	0.543075
CATSPERB	1.3002	7.20798	3.9544	0.000136673	0.000835264	0.535993
PTPN3	-0.603187	8.10036	-3.95387	0.000136938	0.000836659	0.534172
UCP2	0.792452	9.19616	3.95173	0.000138012	0.000842054	0.52683
IRF1	0.761811	9.53704	3.95128	0.000138239	0.000842569	0.525286
RNU4ATAC	0.726019	8.92983	3.95022	0.000138779	0.000845544	0.521623
IRF4	1.21156	8.33222	3.9476	0.000140112	0.000852155	0.512643
CHST15	1.02419	8.02383	3.9463	0.000140777	0.00085597	0.508195
IGKV2D-26	2.0017	9.46198	3.94487	0.000141513	0.000859522	0.503299
DMBT1	2.03264	10.5613	3.94236	0.000142816	0.000866745	0.494684
PNPLA4	-0.640131	7.96283	-3.93828	0.000144956	0.000877855	0.480715
LILRB1	0.849155	7.52774	3.93684	0.000145718	0.000881669	0.47579
DOCK2	1.04082	7.85516	3.93581	0.000146268	0.000884617	0.472256
CXCL9	1.66333	6.99555	3.93498	0.000146712	0.000886362	0.469405
HIST1H4L	0.641953	9.22344	3.93407	0.000147198	0.000889057	0.466304
NCF2	1.3931	7.43374	3.93267	0.000147952	0.000892904	0.461501
AIM2	1.1038	6.08355	3.92776	0.000150617	0.000906579	0.444735
RNU5F-1	0.827869	4.64163	3.92643	0.000151351	0.000909994	0.440173
SEC11C	0.594475	8.34025	3.9228	0.000153359	0.00091991	0.427799
ZNF385D	0.814805	6.04158	3.92255	0.000153502	0.000920528	0.42692
ANKRD20A11P	-0.674783	5.10702	-3.92124	0.000154236	0.000924683	0.422444
GPR124	0.665131	7.85017	3.92102	0.000154354	0.000925149	0.421724
HSPA13	0.792559	7.8139	3.92001	0.000154923	0.000928311	0.418272
LCP1	1.24519	9.6366	3.9196	0.000155154	0.000929453	0.41687
COL5A2	0.984651	7.10737	3.9189	0.000155549	0.000931323	0.414488
ARRDC4	-0.681124	8.9373	-3.91474	0.000157916	0.000942923	0.400305
PIWIL4	-0.581347	6.97353	-3.91373	0.0001585	0.000945504	0.396843
CD28	0.752144	6.22864	3.90876	0.000161385	0.000959943	0.379909
IGKV2D-18	1.06212	7.68384	3.90654	0.000162688	0.000966425	0.372364
TJP3	-0.685897	9.95977	-3.90641	0.000162763	0.00096662	0.37193
PDCD1LG2	1.0322	6.79052	3.90564	0.00016322	0.00096908	0.369299
SRD5A3	0.888238	9.45463	3.90348	0.000164503	0.000975929	0.361953
NRG1	1.11045	7.58894	3.90134	0.000165782	0.000982039	0.354685
TGFB2	0.795978	6.18526	3.89994	0.000166627	0.000985698	0.349914
GNG11	0.866744	7.38456	3.89585	0.000169115	0.000998598	0.336005
TNF	0.615881	6.65519	3.89366	0.000170458	0.00100574	0.328586
CCL18	1.78944	8.49901	3.89339	0.000170624	0.00100606	0.327671
CORO1A	1.01998	9.05318	3.89297	0.000170882	0.00100693	0.326254
IGHV5-78	0.838337	7.71669	3.88914	0.00017327	0.00101863	0.313232
TIFA	0.703589	6.70027	3.88673	0.000174783	0.00102646	0.305076
ERBB3	-0.888793	9.20029	-3.88472	0.000176057	0.00103264	0.298267
IL2RA	1.14066	7.20822	3.88428	0.000176335	0.00103397	0.296783
ABCC9	0.890406	5.8841	3.88294	0.000177197	0.00103795	0.292213
CASP10	0.672393	8.02954	3.8817	0.000177989	0.00104205	0.288028
KCNAB2	0.590618	7.457	3.87706	0.000180997	0.00105776	0.272308
CSF3R	1.52511	7.22905	3.87335	0.000183432	0.00107116	0.259779
PRKAR2B	0.600448	8.01909	3.86969	0.000185867	0.00108399	0.247411
SULF1	1.03881	7.54116	3.8691	0.000186268	0.00108604	0.245393
CD109	0.939893	5.96744	3.86711	0.000187603	0.00109327	0.238695
MPDZ	0.729807	6.30041	3.86694	0.00018772	0.00109367	0.23811
DQX1	-0.772282	7.405	-3.8665	0.000188017	0.00109512	0.236628
SERINC5	-0.634137	9.84478	-3.86607	0.000188306	0.00109634	0.235186
SAA2	1.13211	6.59285	3.86582	0.000188481	0.00109698	0.234316
ICAM3	0.723424	8.54249	3.86075	0.000191948	0.00111402	0.217226
TMEM119	0.629834	7.6043	3.85972	0.000192663	0.00111731	0.213744
TRABD2A	-0.773673	8.69754	-3.85904	0.000193132	0.00111974	0.211463
GSTA1	-0.795733	6.12626	-3.85854	0.00019348	0.0011209	0.209777
MXRA5P1	0.648089	6.32799	3.85819	0.000193729	0.00112177	0.208571
RNF157	-0.848893	7.92626	-3.8579	0.000193928	0.00112206	0.207611
ANGPTL4	1.05727	7.56031	3.85496	0.000195988	0.00113197	0.197704
SLC25A37	0.701499	8.48486	3.8519	0.000198158	0.00114246	0.187384
IGHV3OR15-7	1.16963	6.29592	3.85106	0.000198754	0.00114561	0.184567
PMAIP1	0.701414	7.12865	3.85074	0.000198983	0.00114635	0.183488
COL14A1	0.868463	7.4739	3.85023	0.000199352	0.00114818	0.181752
GPR155	0.630291	6.83336	3.84699	0.00020168	0.00115807	0.170871
PNP	0.580866	9.17632	3.84572	0.000202603	0.00116278	0.166592
ZNF704	-0.919344	7.13191	-3.84412	0.000203769	0.00116858	0.161217
HNF4A	-0.801372	9.74311	-3.84397	0.000203881	0.00116893	0.160701
S100A4	0.617405	7.4482	3.84122	0.000205902	0.00118022	0.151459
ENTPD8	-0.725753	8.51944	-3.83949	0.000207181	0.00118606	0.145658
SPP1	1.8221	7.55683	3.83931	0.000207313	0.00118612	0.145058
TMEM163	0.830221	6.43636	3.83851	0.00020791	0.00118873	0.142367
SPI1	0.647245	8.39125	3.83617	0.00020966	0.00119813	0.134514
LOC101927628	0.823858	9.42262	3.83513	0.000210443	0.0012014	0.131019
LTBP2	0.646761	7.44884	3.83069	0.000213821	0.00121976	0.116103
RNVU1-18	0.58248	11.8298	3.83031	0.000214111	0.0012208	0.114832
CPVL	0.609625	6.67144	3.82362	0.000219299	0.0012432	0.0924102
AGPAT9	-0.717802	8.44268	-3.82082	0.0002215	0.00125318	0.0830572
ALOX5	0.954588	8.61207	3.82048	0.000221772	0.00125441	0.0819061
AGT	0.839595	7.14457	3.82033	0.000221887	0.00125475	0.0814191
IKZF3	0.999182	7.60579	3.81683	0.000224681	0.00126928	0.0697045
GLT8D2	1.01477	7.16757	3.81404	0.000226932	0.0012804	0.0603691
CECR1	0.945745	7.83997	3.81385	0.000227086	0.00128063	0.0597349
SNORD34	0.750138	7.47076	3.81293	0.000227833	0.00128357	0.0566586
PTPRF	-0.74816	9.36638	-3.8121	0.000228507	0.00128705	0.0538906
PTPRCAP	0.654915	8.74122	3.80939	0.000230725	0.00129761	0.0448496
CD83	0.69056	7.01526	3.80932	0.000230786	0.00129764	0.0445993
KLK1	-0.851356	8.78158	-3.80863	0.000231351	0.00129996	0.042312
NCF4	0.918079	8.04513	3.80152	0.000237292	0.00132928	0.0185759
CCL4L2	1.42767	7.14783	3.79174	0.00024569	0.0013692	-0.0139725
FAM129A	0.889353	6.98272	3.79011	0.000247124	0.0013752	-0.0194167
CD86	0.941417	6.46013	3.78945	0.000247703	0.00137775	-0.0216098
TAGAP	1.24575	7.07432	3.7885	0.000248538	0.00138171	-0.0247574
IFIT3	0.830178	6.88764	3.78804	0.000248947	0.00138365	-0.0262964
FPR2	1.53833	5.98515	3.78742	0.000249491	0.00138633	-0.0283382
REG1B	3.0739	7.29596	3.78665	0.000250181	0.00138949	-0.0309233
SAA1	1.24004	6.37595	3.78178	0.000254542	0.00140991	-0.04709
CASD1	-0.608432	9.27447	-3.78054	0.000255665	0.00141475	-0.0512073
ANXA3	0.729069	9.31136	3.77941	0.000256694	0.00141941	-0.054967
CHRDL2	0.717092	6.90681	3.7786	0.000257428	0.00142174	-0.0576365
SLAMF7	1.36025	8.00167	3.77825	0.000257754	0.0014232	-0.0588225
DCN	1.29049	8.43658	3.77628	0.00025956	0.00143177	-0.0653522
MT-TY	-0.680313	9.7391	-3.77575	0.000260046	0.00143375	-0.0671002
SLC35D1	-0.631765	8.50421	-3.77502	0.000260723	0.00143714	-0.0695352
ERBB2	-0.677939	8.78979	-3.77466	0.000261052	0.0014386	-0.0707129
CKB	-1.50416	10.4449	-3.77355	0.000262078	0.00144251	-0.0743819
PCSK6	-0.64339	7.90654	-3.77327	0.000262346	0.00144271	-0.0753371
KCNJ15	1.28354	6.34768	3.77253	0.000263035	0.00144602	-0.0777911
C4BPA	1.8487	7.17148	3.77137	0.000264116	0.00145162	-0.0816281
FBXO32	-0.701384	8.45882	-3.76801	0.000267273	0.00146684	-0.0927386
PIK3R5	0.58847	7.13461	3.76335	0.000271723	0.00148874	-0.10818
LHFP	1.0358	9.03363	3.76288	0.000272176	0.00149086	-0.109738
IL18R1	0.680576	5.68275	3.76247	0.000272565	0.00149263	-0.111074
CEP170	1.02988	6.82766	3.76185	0.000273163	0.00149555	-0.113123
FAM20A	0.828316	6.21565	3.75973	0.000275221	0.00150572	-0.120139
HEPACAM2	-1.88531	8.33538	-3.75791	0.000276999	0.001514	-0.126162
ABCD2	0.633097	5.97898	3.75455	0.000280303	0.00152948	-0.137246
STC1	1.56496	6.87072	3.75431	0.00028054	0.0015303	-0.138037
SFMBT2	0.696071	7.84689	3.75427	0.000280589	0.0015303	-0.138198
SERPINB3	2.89502	6.77917	3.75387	0.000280982	0.00153171	-0.139506
GDA	-0.670543	8.23895	-3.74461	0.000290313	0.00157728	-0.170044
SELPLG	0.971998	8.26903	3.74445	0.00029048	0.0015778	-0.170579
SULT1B1	-0.838338	10.101	-3.7408	0.000294241	0.00159709	-0.182602
ANO9	-0.583705	9.42856	-3.73902	0.000296095	0.001606	-0.188472
FOXP2	-0.8639	5.65571	-3.73627	0.000298972	0.00161889	-0.197506
ACPP	0.853382	7.80595	3.73354	0.000301864	0.00163261	-0.206501
TRAF1	0.68912	6.3185	3.7331	0.000302327	0.00163472	-0.207933
TACSTD2	0.620434	6.34758	3.72475	0.000311341	0.00167708	-0.235378
OCLN	-0.975786	10.0179	-3.72418	0.000311958	0.0016796	-0.237227
CST7	0.786421	8.31248	3.72108	0.00031538	0.00169482	-0.247419
ADAMTS4	0.788092	6.58616	3.72081	0.000315677	0.0016956	-0.248296
FCGR2B	1.12839	8.14577	3.71774	0.000319096	0.00171073	-0.258357
PIK3AP1	0.600361	8.26696	3.71218	0.000325382	0.00174032	-0.276572
STAT4	0.642895	6.91839	3.7085	0.000329603	0.00175917	-0.288608
LOX	1.04245	7.27276	3.70238	0.00033674	0.00179179	-0.308607
DTHD1	0.584189	5.09118	3.6983	0.000341589	0.00181334	-0.321952
C3orf55	0.633443	5.72754	3.6947	0.000345907	0.0018309	-0.333676
PTGFR	0.653105	5.77827	3.6906	0.000350905	0.00185327	-0.347064
TMEM156	1.07595	5.96693	3.68892	0.000352966	0.00186199	-0.352528
RASSF2	1.09729	7.73073	3.68757	0.000354632	0.00186731	-0.356921
PAPPA	0.851093	6.58062	3.68724	0.000355038	0.00186901	-0.357989
TMEM71	0.96719	6.06526	3.68625	0.000356266	0.0018749	-0.361209
GALM	-0.631964	8.85174	-3.68621	0.000356322	0.0018749	-0.361357
RNY3P2	0.660805	6.27466	3.68532	0.000357433	0.00187988	-0.364262
TREM1	1.55374	6.78772	3.68456	0.000358383	0.00188269	-0.366738
LRRK2	1.18509	5.92429	3.68237	0.000361126	0.0018936	-0.373851
FPR1	1.35063	6.82116	3.68186	0.000361762	0.00189606	-0.375493
ERRFI1	0.822155	10.0612	3.67969	0.000364517	0.00190741	-0.38257
APBB1IP	0.871316	7.02504	3.67631	0.000368827	0.00192509	-0.393536
PDE3A	-0.832426	8.90079	-3.67602	0.0003692	0.00192659	-0.394478
HRASLS2	-1.07349	7.01105	-3.67406	0.000371739	0.00193762	-0.400871
DDR2	0.899407	7.50858	3.67189	0.000374546	0.00195046	-0.407888
FAM171B	0.831438	7.41333	3.67046	0.000376415	0.00195929	-0.41253
IKZF1	0.935729	7.06932	3.66998	0.000377052	0.0019617	-0.414105
KIAA0125	0.620105	7.81975	3.6661	0.000382172	0.00198522	-0.426684
HHLA2	-1.19961	10.3086	-3.66594	0.00038239	0.00198577	-0.427216
GPC6	0.699973	7.03451	3.66487	0.000383809	0.00199184	-0.43067
MMRN1	1.16079	7.0887	3.66291	0.00038643	0.00200228	-0.437015
IL1RL1	0.59036	5.56944	3.66166	0.000388113	0.00201004	-0.441066
SDK1	0.59942	7.24121	3.66086	0.000389193	0.00201472	-0.443658
CD68	0.580638	10.2538	3.6596	0.000390901	0.00202226	-0.44774
FAT4	0.704825	6.61379	3.65945	0.000391105	0.00202231	-0.448228
WDFY4	0.748152	7.1699	3.65538	0.000396666	0.00204502	-0.46139
VAV1	0.614865	7.73584	3.65199	0.000401366	0.00206409	-0.472369
LILRA1	0.857454	6.76077	3.65154	0.000401983	0.00206586	-0.473802
SDC2	0.597743	8.05332	3.65141	0.000402168	0.00206634	-0.474231
[truncated: 406 more rows]

## Sheet: C
ID	Term	Ontology Source	Term PValue	Term PValue Corrected with Bonferroni step down	% Associated Genes	Nr. Genes
GO:0045981	positive regulation of nucleotide metabolic process	GO_BiologicalProcess	7.8832e-06	5.51824e-05	7.69231	4
GO:1900544	positive regulation of purine nucleotide metabolic process	GO_BiologicalProcess	7.8832e-06	5.51824e-05	7.69231	4
GO:0051150	regulation of smooth muscle cell differentiation	GO_BiologicalProcess	7.1526e-05	0.000429156	9.09091	3
KEGG:00982	Drug metabolism	KEGG_13.05.2021	0.00073114	0.00073114	4.16667	3
GO:1903580	positive regulation of ATP metabolic process	GO_BiologicalProcess	0.000170367	0.000851833	6.81818	3
GO:0051145	smooth muscle cell differentiation	GO_BiologicalProcess	0.00049441	0.00098882	4.7619	3
GO:0120178	steroid hormone biosynthetic process	GO_BiologicalProcess	0.000280402	0.00112161	5.76923	3
GO:0048016	inositol phosphate-mediated signaling	GO_BiologicalProcess	0.000471677	0.00141503	4.83871	3
