# Supplementary material for: Bioinformatics analysis of oxidative stress genes in the pathogenesis of ulcerative colitis based on a competing endogenous RNA regulatory network
Source: PeerJ. 2024 Aug 16;12:e17213. doi: 10.7717/peerj.17213 (PMC11332386; doi:10.7717/peerj.17213)
Supplement: Supplemental Information 11 — (A) differentially expressed mRNA in cluster 1 from GSE114603. (B) differentially expressed mRNA in cluster 2 from GSE114603. (C) differentially expressed mRNA in cluster 3 from GSE114603. (D) GO and KEGG enrichment analysis for cluster 1. (E) GO and KEGG enrichment analysis for cluster 2. (F) GO and KEGG enrichment analysis for cluster 3. [file peerj-12-17213-s011.xlsx]

## Sheet: Table of contents
Supplementary Table S6-list of representative genes and GO and KEGG enrichment analysis in GSE114603 dataset
A differentially expressed mRNA in cluster 1 from GSE114603
B differentially expressed mRNA in cluster 2 from GSE114603
C differentially expressed mRNA in cluster 3 from GSE114603
D GO and KEGG enrichment analysis for cluster 1
E GO and KEGG enrichment analysis for cluster 2
F GO and KEGG enrichment analysis for cluster 3

## Sheet: A
logFC	AveExpr	t	P.Value	adj.P.Val	B
DHRS11	1.68803	8.52586	6.69647	1.3646e-06	0.00420133	5.41631
ACADS	0.718422	7.39833	6.49305	2.12086e-06	0.00420133	5.01189
TM4SF5	1.31593	7.6265	6.36848	2.78564e-06	0.00420133	4.76117
SLC22A18AS	1.19528	8.2211	6.15114	4.50344e-06	0.00420133	4.31833
C20orf118	0.697416	7.04911	6.03334	5.85686e-06	0.00420133	4.07553
ESPN	0.611771	6.86228	6.01132	6.15295e-06	0.00420133	4.02992
TMEM98	0.580756	8.1733	6.00133	6.29217e-06	0.00420133	4.00922
STAP2	0.786509	7.43062	5.97755	6.63697e-06	0.00420133	3.95986
PXMP2	1.01761	7.72009	5.94489	7.14212e-06	0.00420133	3.89196
KIAA0514	0.71135	7.07787	5.92387	7.48794e-06	0.00420133	3.84818
PPP1R14C	0.7038	7.20766	5.91832	7.58215e-06	0.00420133	3.8366
DDC	1.12752	7.9403	5.91688	7.60685e-06	0.00420133	3.83359
MGC13057	1.54804	8.57381	5.86754	8.50167e-06	0.00420133	3.73056
ETHE1	0.926834	7.3646	5.85304	8.78474e-06	0.00420133	3.70021
CRYL1	0.915803	8.21612	5.84139	9.01893e-06	0.00420133	3.67583
THEM2	0.782419	8.48351	5.82023	9.46096e-06	0.00420133	3.63147
OVOL2	0.829198	7.90775	5.81873	9.49317e-06	0.00420133	3.62832
TAX1BP3	0.616854	9.51154	5.80947	9.69416e-06	0.00420133	3.60889
CHP2	2.39778	7.99716	5.72865	1.16446e-05	0.00420133	3.43883
ZBTB7C	0.723398	7.067	5.71949	1.18898e-05	0.00420133	3.41948
LGALS3	1.0126	8.29954	5.70267	1.23534e-05	0.00420133	3.38397
CBLC	0.582348	7.25277	5.67428	1.31786e-05	0.00420133	3.32394
TMEM120A	0.675706	8.06053	5.60877	1.53037e-05	0.00420133	3.18506
SDSL	0.671673	7.79383	5.60524	1.54276e-05	0.00420133	3.17757
FLJ14213	0.858801	7.54916	5.60448	1.54542e-05	0.00420133	3.17596
FXYD3	1.14164	7.71928	5.53786	1.80008e-05	0.00445067	3.03416
NDUFS4	0.638213	9.36567	5.48943	2.01178e-05	0.00458685	2.93075
MRPL34	0.613094	8.87539	5.41342	2.39637e-05	0.00482267	2.76795
TUBAL3	1.22053	7.7116	5.37098	2.64292e-05	0.00497041	2.67676
HOXB7	0.678386	8.1831	5.35997	2.71101e-05	0.00497041	2.65307
TMEM37	0.596833	6.90019	5.34304	2.81922e-05	0.00497041	2.61662
SLC9A3R1	0.64081	8.97765	5.34176	2.82755e-05	0.00497041	2.61387
VILL	0.699442	7.9286	5.33762	2.85477e-05	0.00497041	2.60494
FABP1	0.760979	6.81638	5.31831	2.98518e-05	0.00498604	2.56333
EDN3	0.918876	7.13466	5.2884	3.19926e-05	0.00498604	2.4988
ID3	0.908413	8.71724	5.27897	3.26998e-05	0.00498604	2.47842
CHPT1	0.671874	7.75656	5.27414	3.30677e-05	0.00498604	2.468
TMEM177	0.624166	7.3871	5.27133	3.3284e-05	0.00498604	2.46192
MRPL35	0.673879	8.08106	5.25165	3.48388e-05	0.00498604	2.41937
ANO10	0.581207	7.54302	5.24786	3.51459e-05	0.00498604	2.41118
DERA	0.643759	9.15042	5.23609	3.61197e-05	0.00504937	2.38571
COX6A1	0.698651	10.1955	5.21652	3.77991e-05	0.00508651	2.34334
GPR160	0.687217	7.11915	5.19459	3.97766e-05	0.00509489	2.29579
SPR	0.907908	7.77435	5.17104	4.20164e-05	0.00515952	2.24471
TMEM171	0.815297	7.65493	5.16872	4.22443e-05	0.00515952	2.23966
PEX11A	0.804548	7.29843	5.09947	4.96424e-05	0.00552762	2.08913
TST	0.850735	11.4773	5.08461	5.13943e-05	0.00559423	2.05677
NDUFA12	0.646486	9.22943	5.07767	5.22342e-05	0.00562016	2.04164
MGST3	0.890686	9.94619	5.05224	5.54306e-05	0.00580353	1.98621
TPSG1	1.25563	8.2271	5.04845	5.59238e-05	0.00580353	1.97795
CLRN3	0.931751	8.92939	5.04667	5.61572e-05	0.00580353	1.97406
FABP2	0.793387	6.90411	5.04031	5.69981e-05	0.00580353	1.96019
CMBL	0.941167	9.49415	5.03145	5.81914e-05	0.00580353	1.94085
C19orf33	1.06067	9.93578	5.02426	5.91791e-05	0.0058123	1.92514
STRADB	0.739465	7.85346	5.02172	5.95315e-05	0.00581708	1.9196
ILDR1	0.80514	7.60547	5.00351	6.2122e-05	0.00597102	1.87984
C9orf152	0.97075	9.52019	5.00027	6.25955e-05	0.00597102	1.87275
STARD10	1.05847	9.39702	4.9892	6.42392e-05	0.00598951	1.84855
METTL7B	1.07166	7.55214	4.97965	6.56931e-05	0.00604882	1.82766
MYO1A	1.19397	8.73354	4.96641	6.7762e-05	0.0061216	1.79871
GLTP	0.667686	9.68744	4.96228	6.84214e-05	0.00614342	1.78967
BRP44	0.785474	9.16072	4.95456	6.96701e-05	0.00614895	1.77278
LRRC19	0.628031	6.76998	4.94371	7.14652e-05	0.00619892	1.74903
TMEM141	0.96122	9.48714	4.93676	7.26397e-05	0.00619892	1.73381
C2orf82	1.07289	8.24888	4.92989	7.38207e-05	0.00619892	1.71875
SUCLG1	0.707971	9.37795	4.92857	7.40495e-05	0.00619892	1.71586
NAAA	0.724707	7.61921	4.91807	7.58963e-05	0.00621368	1.69286
ECH1	0.660701	9.6438	4.91096	7.71731e-05	0.0062195	1.67728
ATP5G1	0.598745	8.57324	4.90756	7.77919e-05	0.0062195	1.66982
NDUFC1	0.628028	8.71261	4.90676	7.79386e-05	0.0062195	1.66806
HIGD2A	0.581105	9.71668	4.90294	7.86393e-05	0.00623444	1.6597
SHD	0.90339	7.15639	4.9022	7.87768e-05	0.00623444	1.65807
FLJ21511	0.651114	6.66347	4.89135	8.08103e-05	0.00624737	1.63427
OSTbeta	1.37552	7.8285	4.88769	8.15082e-05	0.00624737	1.62624
TMEM54	0.879976	10.9373	4.88595	8.18421e-05	0.00624737	1.62242
TCEA3	1.07791	9.23021	4.8813	8.2741e-05	0.00624737	1.61222
COQ9	0.580052	8.71479	4.87614	8.37492e-05	0.00624737	1.60091
HDHD3	0.680101	8.40205	4.8711	8.47464e-05	0.00624737	1.58985
SLC39A5	1.33144	8.53831	4.85848	8.72975e-05	0.00624737	1.56215
KRTCAP3	0.75516	8.25148	4.85835	8.73242e-05	0.00624737	1.56187
CA1	3.16634	8.96874	4.85599	8.78113e-05	0.00624737	1.55667
CENPV	0.830124	8.34181	4.8532	8.83879e-05	0.00624737	1.55056
PLCD1	0.720333	7.10789	4.84628	8.98385e-05	0.00624737	1.53535
CCDC56	0.688008	10.0943	4.83933	9.13201e-05	0.00624737	1.52007
NR2F6	0.618682	8.98165	4.83555	9.21345e-05	0.00625731	1.51178
ITPKA	1.07951	8.60298	4.83007	9.33307e-05	0.00629123	1.49973
TMC4	0.603652	7.40799	4.81889	9.58172e-05	0.00630876	1.47517
NR1H4	0.751901	6.78818	4.80382	9.92779e-05	0.0063117	1.44203
GUCA2B	2.25776	7.82647	4.80152	9.98155e-05	0.0063117	1.43698
DECR2	0.654535	7.77743	4.80135	9.98562e-05	0.0063117	1.4366
C1orf115	0.874707	8.52827	4.79847	0.000100535	0.00631294	1.43027
HEPACAM2	1.1078	7.29013	4.79141	0.000102222	0.00637483	1.41473
CFDP1	1.07699	7.95793	4.78174	0.000104575	0.00639879	1.39347
SDHD	0.626303	7.68081	4.77545	0.000106137	0.00647366	1.37962
PRRG2	0.638417	8.06784	4.75066	0.000112523	0.00670483	1.32503
GJB1	0.640234	6.75285	4.74612	0.000113734	0.00671322	1.31503
CA2	1.69916	10.5148	4.73906	0.000115641	0.00675229	1.2995
BEST2	1.54943	7.56419	4.7221	0.00012036	0.00692738	1.26213
ACY1	0.602692	8.3435	4.71632	0.000122013	0.0069614	1.24938
SRI	0.58633	7.15469	4.71088	0.000123588	0.0069614	1.2374
GPT	0.800456	7.73589	4.71015	0.000123802	0.0069614	1.23578
SUCLG2	0.600834	8.04502	4.70594	0.000125038	0.0069614	1.2265
ACAA2	0.905994	8.64712	4.70099	0.000126507	0.00696225	1.21558
AKR7A3	0.894628	9.6479	4.69607	0.000127984	0.00699165	1.20473
STX3	0.674317	8.49661	4.69216	0.000129171	0.00699399	1.19611
HES5	0.609236	6.74755	4.68439	0.000131564	0.00701871	1.17896
SLC4A4	0.589477	7.14491	4.67903	0.000133239	0.00704916	1.16714
CKMT1A	0.880274	9.04516	4.67531	0.000134414	0.00707221	1.15893
PPP1R14D	0.787008	8.27201	4.67428	0.000134741	0.00707221	1.15666
C15orf48	0.773115	7.47399	4.66055	0.00013918	0.00719364	1.12638
B3GNT8	0.637286	6.99675	4.66048	0.000139206	0.00719364	1.12621
HMGCS2	2.97774	8.46518	4.65624	0.000140606	0.00720154	1.11686
MT1E	1.23462	10.1294	4.65162	0.00014215	0.00720765	1.10665
COX7B	0.798821	8.23274	4.63732	0.000147035	0.00729469	1.07508
C1orf57	0.594298	7.75027	4.63626	0.000147402	0.00729469	1.07275
SLC17A4	0.897695	6.97091	4.62479	0.000151452	0.00733959	1.04742
UQCRQ	0.599643	11.3008	4.61913	0.000153493	0.00733959	1.03491
PKIB	0.688536	7.11902	4.61823	0.000153819	0.00733959	1.03293
SCGB2A1	1.19427	7.49886	4.6161	0.000154595	0.00733959	1.02823
TMEM125	0.731924	8.39323	4.6133	0.000155624	0.00733959	1.02203
RAB25	0.731654	9.1506	4.60595	0.000158352	0.00741507	1.00579
SH3BGRL2	0.980024	8.81315	4.5983	0.00016124	0.00744401	0.988903
REP15	0.88069	7.38661	4.59454	0.00016268	0.00744515	0.980596
XK	0.700116	7.5579	4.57025	0.000172301	0.00771005	0.926905
MT1M	1.20521	7.13952	4.56498	0.000174466	0.00773466	0.915234
PCBD1	0.584366	8.3396	4.56258	0.000175459	0.00774415	0.909929
ADH1C	2.12647	8.11139	4.55481	0.000178716	0.00779675	0.892744
FTH1	0.783654	7.81263	4.55087	0.000180386	0.00784215	0.884052
CKMT1B	0.738232	7.8053	4.53634	0.000186701	0.00803529	0.851899
SLC35D2	0.648357	8.17259	4.52463	0.00019195	0.00814915	0.82599
SFTPD	0.734442	7.08955	4.49548	0.000205669	0.00837547	0.761488
OR2A14	0.911584	6.89654	4.48847	0.000209111	0.00844914	0.74598
UGDH	0.799388	7.83859	4.4852	0.000210737	0.0084539	0.738745
TP53AP1	0.73645	7.17662	4.47947	0.000213621	0.0084539	0.726043
C5orf30	0.673409	7.44545	4.47933	0.00021369	0.0084539	0.725739
MT1H	0.825356	6.87102	4.4768	0.000214972	0.0084539	0.72015
NDUFB7	0.588026	9.88857	4.4761	0.00021533	0.0084539	0.718596
PDZD3	1.28756	7.60867	4.47269	0.00021708	0.0084539	0.711033
CLYBL	0.773791	7.6189	4.47123	0.00021783	0.0084539	0.707813
FGFR3	0.708085	7.13187	4.47102	0.000217939	0.0084539	0.707343
ARV1	0.598982	7.63494	4.4683	0.000219349	0.0084539	0.70132
LRRC31	0.862296	7.4222	4.46824	0.000219381	0.0084539	0.701182
COX6B1	0.590026	7.90316	4.46724	0.000219903	0.00845698	0.698964
COX5B	0.737115	10.4184	4.44778	0.00023028	0.00863655	0.655882
TMIGD1	1.00184	6.96343	4.44188	0.000233521	0.00863655	0.642823
GPD1L	0.884145	9.3576	4.43808	0.000235637	0.00863655	0.634393
RNF186	0.651945	8.15169	4.43791	0.00023573	0.00863655	0.634027
PLA2G10	0.928721	10.3467	4.43626	0.000236656	0.00863655	0.630362
RDH5	0.912898	7.84244	4.42824	0.0002412	0.00865522	0.612595
VIPR1	1.41512	8.47191	4.39235	0.000262625	0.00891808	0.53309
TKTL1	0.961728	7.00448	4.38834	0.000265131	0.00894611	0.524219
HSD11B2	1.7363	9.32677	4.38805	0.000265319	0.00894611	0.523555
SPDEF	0.705083	7.70036	4.37534	0.000273434	0.00913022	0.495412
PLCE1	0.837887	7.6104	4.37033	0.000276706	0.00915281	0.484298
AKR1B10	1.15772	9.197	4.3665	0.000279229	0.00921744	0.475821
MT1G	2.03645	10.1263	4.35933	0.000284025	0.00925387	0.459911
BDKRB2	0.97604	7.40863	4.3579	0.000284986	0.00925387	0.456758
MTE	0.832899	7.17256	4.35653	0.000285918	0.00925387	0.453707
GUCA2A	2.90078	10.192	4.3551	0.000286889	0.00925387	0.450539
ATP1B3	0.688419	8.46934	4.35314	0.000288226	0.00925387	0.446199
C9orf75	0.61561	7.56692	4.35206	0.000288961	0.00925387	0.443819
CFD	0.782207	8.71338	4.35197	0.000289022	0.00925387	0.44362
TRPM6	1.47939	7.32938	4.34869	0.000291284	0.00925387	0.436339
BEST4	1.07888	7.62418	4.34832	0.000291537	0.00925387	0.435528
PMM1	0.734386	8.12407	4.34761	0.000292032	0.00925387	0.433942
IMPA2	0.726565	9.01603	4.34007	0.0002973	0.00931897	0.417244
FAM55D	1.24919	8.10985	4.33626	0.000300003	0.00934743	0.40879
PRDX6	1.02116	10.0696	4.33279	0.000302484	0.00940451	0.401097
SLC9A2	0.902438	7.6832	4.32536	0.000307866	0.00947633	0.384624
RNASE1	0.761131	8.26695	4.32415	0.000308753	0.00947633	0.381939
XRCC6BP1	0.621019	7.45321	4.31244	0.000317454	0.00968132	0.355982
SCIN	0.690852	7.26898	4.30691	0.000321643	0.00972106	0.343737
PAQR8	0.915458	8.86669	4.30501	0.0003231	0.00972106	0.339516
C8orf40	0.628652	8.15645	4.29657	0.000329637	0.00980917	0.320809
EPHX2	0.869217	7.42921	4.29241	0.000332903	0.00983913	0.311603
PRSS3	0.721938	9.21598	4.2892	0.000335454	0.00986651	0.304472
SLC22A5	0.912786	7.4312	4.28877	0.000335796	0.00986651	0.303523
MRPL21	0.593812	8.62614	4.28865	0.00033589	0.00986651	0.303261
BRP44L	0.630463	8.92286	4.26414	0.000356013	0.0102071	0.248928
VSIG2	1.36482	9.56814	4.25751	0.00036166	0.0103073	0.234233
POF1B	0.620395	7.40402	4.24228	0.000374976	0.010484	0.200472
KBTBD11	0.62793	8.44873	4.24155	0.000375625	0.0104868	0.198857
HNF1B	0.584481	7.31337	4.23523	0.00038131	0.0105992	0.184832
CPT2	0.680522	8.2002	4.23062	0.000385501	0.0107002	0.174626
SELENBP1	1.64529	8.9271	4.21801	0.000397218	0.0108235	0.146673
HIGD1A	0.80537	8.73085	4.21183	0.000403094	0.01091	0.132965
LGALS4	1.04303	12.2152	4.19883	0.000415733	0.0110747	0.104143
GRTP1	0.619862	7.69864	4.18322	0.000431429	0.011286	0.0695519
KLF4	0.770231	7.72635	4.18214	0.000432537	0.011286	0.067156
ACAA1	0.609444	8.54954	4.16633	0.000449078	0.0114099	0.0321294
MAOA	1.30535	10.0102	4.16571	0.000449741	0.0114099	0.0307532
CTDSPL	0.595895	8.51705	4.13935	0.000478792	0.0117562	-0.0276611
FMO5	0.743393	7.06271	4.12145	0.000499582	0.0120352	-0.0673217
ATP5O	0.595152	10.2358	4.11841	0.000503203	0.0120467	-0.0740604
SLC22A23	0.616205	7.6634	4.11384	0.000508694	0.0120984	-0.0841861
IGSF9	0.867306	7.16751	4.09602	0.000530676	0.0123644	-0.123653
KLK1	0.759346	7.35478	4.09145	0.000536468	0.0124676	-0.13378
CCL13	0.79648	7.57812	4.08905	0.000539525	0.0125097	-0.13908
KRT20	0.655014	7.46246	4.08806	0.000540801	0.0125102	-0.141285
CYP2J2	0.792623	8.63942	4.08802	0.000540854	0.0125102	-0.141375
CDX2	1.14025	9.62165	4.07472	0.000558201	0.0126667	-0.170823
SLC20A2	0.591302	7.37101	4.06343	0.000573355	0.0128551	-0.195804
AQP8	3.27027	8.09834	4.06159	0.000575863	0.0128843	-0.199876
FOXA3	0.729688	8.21505	4.05268	0.000588178	0.0130161	-0.219608
FAM23B	0.798941	7.07121	4.04831	0.000594309	0.0130668	-0.229279
MT1F	1.52702	8.84361	4.0464	0.00059701	0.0130854	-0.233507
DDT	0.670669	10.4283	4.04254	0.000602508	0.0131404	-0.242056
NDUFB10	0.594328	8.53883	4.04065	0.000605217	0.0131404	-0.246238
MTMR11	0.900298	9.57681	4.03975	0.000606509	0.0131404	-0.248227
RHOU	1.09604	8.23117	4.0378	0.000609326	0.0131413	-0.252548
MEP1A	1.34203	9.09639	4.03594	0.000612019	0.0131413	-0.25666
TSPAN7	0.772919	8.3028	4.02382	0.00062988	0.013338	-0.283481
SLC16A9	1.5055	7.69609	4.02356	0.000630266	0.013338	-0.284051
A1CF	0.949445	7.8947	4.01872	0.000637544	0.0134255	-0.294756
CYP4F12	0.993935	7.99907	4.01848	0.000637909	0.0134255	-0.29529
SLC25A23	0.713943	8.7361	4.01436	0.000644175	0.0135208	-0.304402
HHLA2	0.841454	7.98734	4.01019	0.000650583	0.0135877	-0.31363
OTOP2	0.582147	6.53582	4.00094	0.000665024	0.0137099	-0.334095
LRRC26	1.13236	9.19637	3.98918	0.000683842	0.0139061	-0.360104
CA12	0.870172	8.89458	3.98862	0.000684744	0.0139069	-0.361333
DCTPP1	0.64481	9.5189	3.98246	0.000694829	0.0140373	-0.37496
NDUFAB1	0.697003	8.80208	3.97482	0.000707538	0.0140654	-0.391852
NDFIP2	0.599637	8.62387	3.94263	0.000763678	0.0147886	-0.462998
PPARGC1A	0.794201	7.12741	3.92014	0.000805489	0.0152706	-0.512651
RAVER2	0.832668	7.95109	3.91394	0.000817413	0.0153103	-0.526338
DDAH2	0.608884	7.43972	3.91103	0.000823078	0.0153492	-0.53277
RAP1GAP	1.03979	8.7172	3.90895	0.000827155	0.0153952	-0.537371
CHCHD10	0.624198	10.6779	3.90759	0.000829818	0.0153999	-0.540364
PRR15L	0.742931	9.37255	3.8983	0.000848291	0.0155494	-0.560868
GPA33	1.00323	10.1786	3.88384	0.000877869	0.0158309	-0.592782
PLEKHG6	0.668063	7.46575	3.87417	0.000898201	0.0159604	-0.614098
CAPN13	1.13758	7.29005	3.87156	0.00090378	0.0159604	-0.619863
PIGZ	1.00583	7.59064	3.87032	0.00090643	0.0159713	-0.622588
MYO1D	0.78958	8.93269	3.86636	0.000914974	0.0160472	-0.631321
SERINC2	0.765979	9.09021	3.86069	0.000927361	0.0161023	-0.643838
ATP5E	0.698445	7.65545	3.85363	0.000942994	0.0162705	-0.659398
NAT8B	0.786571	6.8031	3.83783	0.000978942	0.0166442	-0.694216
SYTL4	0.660315	8.1307	3.83268	0.000990954	0.0167066	-0.705563
RAB17	0.66133	8.11239	3.82825	0.00100139	0.0167393	-0.71531
SLC26A3	1.76463	11.5847	3.82509	0.00100892	0.0168171	-0.722281
LOC389816	1.17754	9.63148	3.8173	0.00102768	0.017027	-0.739423
CES2	0.667	8.84741	3.81599	0.00103087	0.0170633	-0.742309
ASAP3	0.615484	7.83322	3.81021	0.00104508	0.0171511	-0.755037
STX19	0.682817	8.69229	3.79103	0.00109359	0.0176895	-0.797241
COBL	0.671815	8.40143	3.78792	0.00110165	0.017805	-0.804075
C1orf53	0.746067	7.2184	3.78684	0.00110447	0.0178252	-0.806449
APPL2	0.68045	9.06194	3.77808	0.00112759	0.0180263	-0.825712
DENND2A	0.713716	8.22162	3.7545	0.00119225	0.0186097	-0.877556
PHLPP2	0.741626	7.08564	3.75273	0.00119724	0.0186324	-0.881439
HPGD	1.0254	8.3292	3.74108	0.00123067	0.0189671	-0.907033
CAMK2N1	0.931197	9.74056	3.73692	0.0012428	0.0190875	-0.916147
C6orf136	0.732971	8.59337	3.72576	0.00127601	0.0193647	-0.940654
VIL1	0.760912	8.13297	3.71736	0.00130158	0.0196022	-0.959089
AKR1C3	0.838042	10.1343	3.71398	0.00131201	0.0196925	-0.966502
C5orf35	0.636285	7.0803	3.7087	0.00132845	0.019846	-0.97807
ACAT1	0.640977	8.8805	3.69863	0.00136041	0.0200419	-1.00015
TMED6	0.600571	6.79317	3.68975	0.00138923	0.0203259	-1.01962
MESP1	0.800671	7.06106	3.66736	0.00146457	0.020948	-1.06865
CD9	0.702572	8.12958	3.65799	0.00149728	0.0211986	-1.08916
MRPL41	0.597897	8.74664	3.65772	0.00149824	0.0211986	-1.08975
CLDN23	0.80586	9.59209	3.65393	0.00151169	0.0212881	-1.09805
ELF3	0.663729	8.86879	3.65159	0.00152007	0.0212965	-1.10318
HADH	0.624174	9.77638	3.63369	0.00158555	0.0217797	-1.14232
HRCT1	0.974857	7.26688	3.62162	0.00163125	0.0221244	-1.16868
CDX1	0.771239	9.87333	3.62117	0.001633	0.0221244	-1.16967
OAF	0.786773	9.32857	3.61449	0.0016589	0.0222768	-1.18427
CAPN5	0.753253	9.12473	3.59422	0.00173995	0.0228332	-1.22851
DEFB1	0.776033	7.2181	3.59373	0.00174196	0.022835	-1.22957
SLC25A34	0.991013	7.16338	3.58681	0.00177055	0.0230865	-1.24467
CKB	1.63148	9.47651	3.57471	0.00182165	0.0235572	-1.27104
FOXD2	0.713187	8.53686	3.57024	0.00184088	0.0237261	-1.28077
GGT6	0.695322	8.11628	3.56504	0.00186352	0.0238252	-1.2921
WASL	0.593605	9.17005	3.55542	0.00190613	0.0240453	-1.31306
CAPN9	0.871871	7.67561	3.54287	0.00196317	0.0244376	-1.34037
SATB2	1.04205	8.28864	3.53406	0.00200421	0.0248621	-1.35953
C2orf89	0.67339	8.17592	3.53031	0.00202192	0.0249992	-1.36768
CDKN2B	0.614681	7.08092	3.52837	0.00203114	0.0250809	-1.37189
MS4A12	1.62282	8.57693	3.51094	0.00211593	0.0257624	-1.40976
GUCY2C	0.67236	8.27352	3.50096	0.00216604	0.0260578	-1.43143
CFTR	0.738897	8.29284	3.49421	0.0022006	0.0264117	-1.44608
C7orf59	0.776028	9.62689	3.48843	0.00223062	0.0265098	-1.45861
CLDN7	0.656612	10.4221	3.47502	0.00230178	0.026979	-1.48767
CLDN8	1.20632	7.03151	3.47367	0.00230905	0.0270476	-1.49059
NEU4	1.12004	7.83718	3.47144	0.00232117	0.0271431	-1.49543
PTPRF	0.778149	8.64131	3.46973	0.00233046	0.0271821	-1.49913
ANPEP	1.26354	7.8794	3.45987	0.00238491	0.0276488	-1.52048
C6orf85	0.65904	8.27242	3.44262	0.00248315	0.0281681	-1.55781
HSD17B2	0.726414	8.56251	3.42546	0.00258477	0.0288818	-1.59488
RETNLB	0.732613	7.41946	3.40655	0.00270152	0.0295654	-1.63569
SLC44A3	0.584642	7.75886	3.39516	0.00277428	0.0299848	-1.66024
PKDCC	0.690472	7.53619	3.38206	0.00286041	0.030639	-1.68847
PLCD3	0.582794	7.38624	3.37089	0.00293586	0.0311165	-1.7125
AHCYL2	0.797967	8.81412	3.36506	0.00297604	0.0314033	-1.72504
C10orf116	1.1902	9.01019	3.33777	0.00317126	0.0327065	-1.78365
TFF3	0.601967	12.9565	3.33309	0.00320597	0.0328933	-1.79369
ABP1	0.757896	9.51456	3.31291	0.00335999	0.0338024	-1.83695
JCLN	1.8373	10.5947	3.308	0.00339855	0.0340351	-1.84746
C1orf106	0.594137	8.88969	3.26321	0.00377074	0.0363814	-1.94317
SEMA6A	0.632295	7.77218	3.26144	0.00378616	0.036448	-1.94692
BAIAP2L2	0.761808	9.24559	3.23318	0.00404221	0.038016	-2.00712
ARL14	0.629035	8.02324	3.20225	0.00434165	0.039919	-2.07281
OSTalpha	1.22637	6.99132	3.20103	0.00435385	0.0399698	-2.07539
TRPM4	0.748511	9.14564	3.19873	0.00437707	0.0400836	-2.08028
TTC38	0.605724	8.78993	3.19281	0.00443721	0.0403905	-2.09281
MRPL11	0.587271	7.95172	3.18254	0.00454358	0.0410852	-2.11457
KIAA0672	0.636008	7.72725	3.12739	0.00515836	0.0448041	-2.231
RICH2	0.709114	7.91044	3.1177	0.00527443	0.0454164	-2.25139
TP53INP2	0.596558	8.34312	3.08055	0.00574321	0.0475612	-2.32938
CLCA1	1.96282	10.3016	3.06611	0.00593608	0.048481	-2.3596
ITLN1	1.61394	10.6801	3.033	0.00640236	0.0511335	-2.42873
ADH1A	0.789004	7.8643	3.01674	0.0066441	0.0525994	-2.46259
MT1A	0.905827	10.4391	2.95118	0.00771079	0.0580263	-2.59839
CGN	0.801196	9.22338	2.94928	0.007744	0.0580936	-2.6023
PCK1	0.58482	6.6365	2.94433	0.00783127	0.0584507	-2.61251
PRAC	0.625452	9.26849	2.94222	0.00786872	0.0585932	-2.61685
CDS1	0.623816	8.10441	2.9129	0.00840789	0.0613674	-2.67717
OAS1	0.593936	7.92096	2.88297	0.00899459	0.064422	-2.73848
FAM55A	0.596077	7.40092	2.87223	0.00921454	0.0653308	-2.76042
RPL39	0.633081	8.85718	2.85843	0.00950489	0.0665343	-2.78858
ABCB1	0.658242	6.99384	2.85131	0.009658	0.0672048	-2.80308
CDH17	0.679054	10.9789	2.82619	0.0102172	0.0697115	-2.85411
GINS2	0.633358	7.70012	2.7962	0.0109254	0.0728819	-2.9148
CCL8	0.643759	7.84731	2.724	0.0128272	0.0807444	-3.05975
LGALS2	0.777599	8.01478	2.697	0.0136163	0.0841764	-3.11354
C10orf99	0.948097	10.8542	2.68154	0.0140885	0.0860952	-3.14422
BCAS1	0.648983	8.28042	2.67158	0.0144007	0.0872795	-3.16394
SCNN1B	0.78653	7.66233	2.4471	0.0234356	0.118993	-3.59896
EMP1	0.596535	9.95881	2.36208	0.0280703	0.13307	-3.75851
CEACAM7	0.782704	9.16737	2.32842	0.0301295	0.139571	-3.82083
UGT2B7	1.67044	8.70405	2.28665	0.0328779	0.147939	-3.89744
UGT2B17	0.856118	7.12277	2.25557	0.03507	0.154334	-3.95392
CA4	0.975776	11.0548	2.13364	0.0450233	0.180697	-4.17103
C15orf52	0.586934	8.03787	2.12307	0.045997	0.183108	-4.18951
SELL	2.08763	7.88254	9.87161	2.19e-16	8.38e-15	26.7891
TSPAN7	-1.16139	9.70775	-9.87097	2.19e-16	8.39e-15	26.786
SLFN5	1.02613	8.86704	9.86279	2.28e-16	8.7e-15	26.7455
CCR1	1.47357	6.67855	9.85874	2.33e-16	8.87e-15	26.7254
SULT1A2	-1.27989	7.75214	-9.83634	2.61e-16	9.79e-15	26.6146
FCER1G	1.57078	7.79935	9.82742	2.73e-16	1.02e-14	26.5704
ELTD1	1.83778	7.48028	9.8233	2.78e-16	1.04e-14	26.5501
PXDN	1.48981	8.70827	9.82147	2.81e-16	1.05e-14	26.541
BEST4	-1.77921	7.91319	-9.81894	2.85e-16	1.06e-14	26.5285
GLRA2	-1.75242	5.60863	-9.81407	2.92e-16	1.08e-14	26.5044
CEMIP	2.26378	7.92716	9.79791	3.16e-16	1.17e-14	26.4244
SLC39A5	-1.52366	8.99417	-9.78873	3.31e-16	1.21e-14	26.379
COL4A1	1.44215	8.40158	9.7872	3.34e-16	1.22e-14	26.3714
IL13RA2	2.15501	5.75636	9.77889	3.48e-16	1.27e-14	26.3303
LUM	1.6113	9.58734	9.77453	3.55e-16	1.29e-14	26.3087
CXCL9	2.07507	7.16496	9.76347	3.76e-16	1.35e-14	26.254
MNDA	1.70303	5.98919	9.75304	3.96e-16	1.42e-14	26.2024
CTSL	1.11754	8.64351	9.7488	4.04e-16	1.44e-14	26.1814
SOCS3	1.70338	8.80095	9.73911	4.24e-16	1.5e-14	26.1335
CXCR2	1.89587	6.19302	9.7391	4.25e-16	1.5e-14	26.1334
PTGDR	-1.12488	7.61726	-9.73785	4.27e-16	1.51e-14	26.1272
EMP3	1.05367	8.54795	9.73386	4.36e-16	1.53e-14	26.1075
ADAMTS9	1.29504	8.08533	9.72362	4.59e-16	1.61e-14	26.0568
BCL2A1	1.67672	7.06676	9.70971	4.92e-16	1.72e-14	25.988
ANXA6	1.09348	9.72332	9.70828	4.95e-16	1.73e-14	25.9809
IGKV2OR22-4	1.30568	6.11163	9.70741	4.98e-16	1.74e-14	25.9766
RNU6-570P	-1.11584	5.34688	-9.68197	5.65e-16	1.96e-14	25.8507
CD93	1.35726	8.40789	9.67997	5.71e-16	1.97e-14	25.8408
ANGPT2	1.33961	6.48611	9.67272	5.92e-16	2.04e-14	25.805
LILRA1	1.15546	6.84811	9.66706	6.09e-16	2.09e-14	25.7769
TAGAP	1.62009	7.2012	9.66183	6.25e-16	2.14e-14	25.7511
LILRB3	1.37819	7.55719	9.65671	6.42e-16	2.18e-14	25.7257
CD55	1.29826	11.1114	9.65445	6.49e-16	2.2e-14	25.7146
CECR1	1.17395	7.9363	9.65232	6.56e-16	2.22e-14	25.704
STC1	2.05006	7.03011	9.6473	6.73e-16	2.27e-14	25.6792
CNTN3	-1.20637	5.63923	-9.64393	6.84e-16	2.3e-14	25.6625
VCAM1	1.43834	7.69642	9.63633	7.11e-16	2.38e-14	25.6249
COL6A3	1.74373	9.25196	9.61604	7.87e-16	2.6e-14	25.5245
IGFBP7	1.1297	10.3435	9.6107	8.08e-16	2.67e-14	25.4981
THY1	1.44532	8.16041	9.60913	8.14e-16	2.68e-14	25.4903
PRRX1	1.62211	7.46478	9.6045	8.33e-16	2.74e-14	25.4675
SLC7A7	1.09813	7.14959	9.6	8.52e-16	2.8e-14	25.4452
RASSF2	1.40533	7.84249	9.59694	8.66e-16	2.84e-14	25.43
ITGA4	1.0571	7.45086	9.59158	8.89e-16	2.91e-14	25.4035
BDH1	-1.06718	8.07065	-9.58723	9.09e-16	2.97e-14	25.382
ANGPTL2	1.44775	8.36149	9.5848	9.2e-16	2.99e-14	25.37
ARHGEF6	1.00405	7.15739	9.58466	9.21e-16	2.99e-14	25.3693
CXCL13	2.26422	7.28083	9.58145	9.36e-16	3.04e-14	25.3534
ANKRD44	1.07909	7.63318	9.57954	9.45e-16	3.05e-14	25.344
SELENBP1	-1.41765	10.5885	-9.57272	9.77e-16	3.14e-14	25.3102
DOCK11	1.11093	7.73509	9.57	9.91e-16	3.18e-14	25.2968
CXCL2	1.59134	7.99285	9.55937	1.04e-15	3.33e-14	25.2442
C2	1.09214	8.28179	9.54656	1.11e-15	3.53e-14	25.1808
PLCE1	-1.17468	9.0755	-9.52538	1.24e-15	3.89e-14	25.0761
EMR3	1.25732	6.24936	9.51656	1.3e-15	4.05e-14	25.0324
CFB	1.40797	10.0087	9.51079	1.33e-15	4.16e-14	25.0039
SLC6A19	-1.42483	6.85277	-9.48918	1.49e-15	4.57e-14	24.897
PLA1A	1.01819	6.79703	9.48806	1.49e-15	4.58e-14	24.8915
MEDAG	1.41928	6.81716	9.48111	1.55e-15	4.73e-14	24.8571
ABCG2	-1.84737	6.34109	-9.48031	1.55e-15	4.74e-14	24.8531
RBMS1	1.02638	7.79777	9.47481	1.6e-15	4.85e-14	24.8259
BCL6	1.326	7.70622	9.46884	1.64e-15	4.97e-14	24.7964
TREM1	2.0611	6.94597	9.45439	1.77e-15	5.31e-14	24.7249
LAMC1	1.1182	8.60178	9.43284	1.97e-15	5.83e-14	24.6184
PHLPP2	-1.1475	8.20383	-9.43079	1.99e-15	5.87e-14	24.6083
TM4SF1	1.35936	10.5981	9.4221	2.08e-15	6.12e-14	24.5653
IL1B	2.51715	8.99407	9.4204	2.1e-15	6.16e-14	24.5569
RPS6KA6	-1.12016	6.4338	-9.41909	2.11e-15	6.19e-14	24.5504
SLC17A4	-1.68076	7.08903	-9.41519	2.15e-15	6.3e-14	24.5311
CA1	-2.78742	8.84874	-9.40413	2.27e-15	6.65e-14	24.4764
MEF2C	1.30516	8.48718	9.40323	2.29e-15	6.67e-14	24.472
CDH11	1.16599	8.50223	9.39685	2.36e-15	6.86e-14	24.4405
IGSF6	1.56019	8.63417	9.39482	2.38e-15	6.9e-14	24.4304
VIM	1.07742	10.2183	9.39173	2.42e-15	7e-14	24.4151
ARHGAP15	1.19408	6.9499	9.37784	2.59e-15	7.48e-14	24.3465
MXRA5	1.54931	9.23786	9.37546	2.63e-15	7.56e-14	24.3347
TFPI	1.32865	6.81254	9.37387	2.65e-15	7.61e-14	24.3268
SRPX2	1.16312	7.40878	9.3674	2.73e-15	7.81e-14	24.2949
AIM2	1.34468	6.19598	9.36602	2.75e-15	7.85e-14	24.288
SNX10	1.04667	7.27966	9.36514	2.77e-15	7.87e-14	24.2837
SLC4A4	-1.7009	9.76771	-9.36512	2.77e-15	7.87e-14	24.2836
FCGR1A	1.66146	6.29054	9.36421	2.78e-15	7.9e-14	24.2791
MYO1F	1.05821	7.84339	9.3573	2.88e-15	8.16e-14	24.245
IL1A	2.0226	6.72836	9.35242	2.95e-15	8.32e-14	24.2208
TLR8	1.18759	6.1892	9.346	3.04e-15	8.56e-14	24.1891
DOC2B	1.00359	7.80839	9.33377	3.24e-15	9.06e-14	24.1286
WNT5A	1.79096	7.37758	9.32044	3.46e-15	9.62e-14	24.0628
CHI3L2	1.64098	6.22333	9.30629	3.71e-15	1.03e-13	23.9928
COL12A1	2.00296	8.44945	9.30363	3.76e-15	1.04e-13	23.9797
SLC9A2	-1.47873	8.89731	-9.29739	3.88e-15	1.07e-13	23.9488
CORO1A	1.23996	9.15707	9.29616	3.91e-15	1.08e-13	23.9428
PKDCC	-1.04474	8.0784	-9.28149	4.2e-15	1.15e-13	23.8703
ITGA5	1.51748	9.07927	9.26046	4.67e-15	1.26e-13	23.7664
NHSL1	-1.0557	8.81331	-9.25593	4.78e-15	1.29e-13	23.744
CHN1	1.38551	6.68552	9.24993	4.92e-15	1.32e-13	23.7144
LRRK2	1.54924	6.04499	9.24288	5.1e-15	1.35e-13	23.6795
TMEM154	1.19635	7.59766	9.2426	5.11e-15	1.36e-13	23.6781
PTP4A3	1.19385	8.47843	9.23866	5.21e-15	1.38e-13	23.6587
SLC2A3	1.64058	8.25592	9.23024	5.43e-15	1.43e-13	23.6171
GJA1	1.4735	7.77171	9.2228	5.64e-15	1.49e-13	23.5804
TMEM163	1.04122	6.52092	9.20961	6.02e-15	1.58e-13	23.5152
IGHV5-78	1.02124	7.80207	9.19122	6.61e-15	1.72e-13	23.4244
HEG1	1.16738	8.14823	9.18722	6.74e-15	1.76e-13	23.4047
ATP2C2	-1.119	8.83101	-9.16764	7.43e-15	1.92e-13	23.308
GPX7	1.01399	8.24916	9.16364	7.58e-15	1.96e-13	23.2882
IL33	1.25174	6.35147	9.15891	7.76e-15	2e-13	23.2649
ENPP2	1.15158	8.91816	9.14811	8.2e-15	2.1e-13	23.2116
LILRA3	1.56519	7.02409	9.14388	8.37e-15	2.14e-13	23.1907
PARP9	1.07701	8.30248	9.14005	8.53e-15	2.17e-13	23.1718
LOX	1.33315	7.37893	9.12474	9.21e-15	2.33e-13	23.0962
FLT1	1.22123	7.37648	9.122	9.34e-15	2.36e-13	23.0827
GBP1	1.21206	10.3829	9.11561	9.64e-15	2.43e-13	23.0512
SLAMF8	1.04898	7.63341	9.11309	9.76e-15	2.45e-13	23.0387
MGP	1.72409	7.56468	9.11275	9.78e-15	2.45e-13	23.037
CCDC3	1.35823	7.88789	9.1069	1.01e-14	2.52e-13	23.0082
LRRC31	-1.28691	6.76635	-9.08935	1.1e-14	2.73e-13	22.9215
INHBA	1.91748	7.34176	9.07591	1.18e-14	2.91e-13	22.8553
SLC13A2	-1.74884	7.39853	-9.06081	1.27e-14	3.12e-13	22.7808
CXCL11	2.10319	7.25654	9.05028	1.34e-14	3.27e-13	22.7288
PIGZ	-1.38674	7.98456	-9.04708	1.36e-14	3.32e-13	22.7131
FBN1	1.51532	7.80181	9.02721	1.5e-14	3.63e-13	22.6151
KDR	1.33511	7.91685	9.02658	1.51e-14	3.64e-13	22.6119
CKB	-1.88389	10.2917	-9.01939	1.56e-14	3.75e-13	22.5765
CCL2	1.82053	9.17066	9.00992	1.64e-14	3.92e-13	22.5298
PAQR5	-1.02145	7.4704	-9.00071	1.71e-14	4.09e-13	22.4844
VCAN	1.56518	8.47582	8.99802	1.74e-14	4.14e-13	22.4711
FAM126A	1.13376	6.27525	8.99762	1.74e-14	4.15e-13	22.4691
PTGS2	2.37727	8.34278	8.99378	1.77e-14	4.21e-13	22.4502
HLA-DOB	1.16401	6.84991	8.97673	1.93e-14	4.55e-13	22.3662
SERPING1	1.2891	9.13758	8.96928	2e-14	4.71e-13	22.3295
BNIP3	1.19606	8.06025	8.96734	2.02e-14	4.75e-13	22.3199
CA2	-1.42473	10.208	-8.96034	2.1e-14	4.91e-13	22.2854
CALCRL	1.57508	7.37295	8.95779	2.12e-14	4.97e-13	22.2728
C4B	1.40007	8.22057	8.93823	2.34e-14	5.43e-13	22.1765
SLC30A10	-1.71809	7.26384	-8.90335	2.79e-14	6.36e-13	22.0046
CSGALNACT1	1.0982	6.23304	8.8996	2.84e-14	6.45e-13	21.9862
DYSF	1.36303	7.11393	8.88702	3.02e-14	6.81e-13	21.9242
WISP1	1.07012	7.42933	8.87697	3.18e-14	7.13e-13	21.8747
GPR132	1.02584	6.96793	8.87163	3.26e-14	7.28e-13	21.8485
SATB2	-1.34737	10.2775	-8.86594	3.36e-14	7.48e-13	21.8204
KLK1	-1.03561	8.69487	-8.85842	3.49e-14	7.74e-13	21.7834
STRIP2	1.32186	6.82222	8.83839	3.85e-14	8.47e-13	21.6848
FGF2	1.00712	7.88073	8.83465	3.93e-14	8.61e-13	21.6664
ICOS	1.10931	5.98796	8.83108	4e-14	8.74e-13	21.6489
CDH3	1.72807	8.63448	8.83015	4.01e-14	8.77e-13	21.6443
HSD11B2	-1.5561	9.676	-8.82537	4.11e-14	8.95e-13	21.6207
MIR223	1.49497	6.41166	8.82018	4.22e-14	9.17e-13	21.5952
CLDN1	1.63287	8.00172	8.81839	4.26e-14	9.24e-13	21.5864
UBD	1.45582	7.47767	8.80625	4.52e-14	9.76e-13	21.5267
GALNT12	-1.23042	9.18159	-8.79345	4.82e-14	1.03e-12	21.4637
GPR65	1.08863	6.17617	8.77314	5.33e-14	1.13e-12	21.3638
GBP2	1.02206	8.23234	8.75336	5.89e-14	1.24e-12	21.2666
MCTP1	1.24528	7.19674	8.74323	6.19e-14	1.29e-12	21.2168
OLFML2B	1.10617	6.66658	8.73354	6.5e-14	1.35e-12	21.1691
NPY4R	-1.45272	6.186	-8.72848	6.66e-14	1.38e-12	21.1443
CES2	-1.06013	10.0258	-8.7146	7.14e-14	1.47e-12	21.0761
C5AR1	1.15242	7.58774	8.71453	7.14e-14	1.47e-12	21.0757
CDH5	1.12755	8.45285	8.69522	7.87e-14	1.6e-12	20.9809
LILRA5	1.39846	6.41821	8.69427	7.9e-14	1.6e-12	20.9762
EDNRA	1.61573	7.46105	8.69239	7.98e-14	1.61e-12	20.9669
EDN3	-1.04824	8.42393	-8.66305	9.23e-14	1.85e-12	20.8229
EVI2A	1.07031	6.28135	8.66209	9.28e-14	1.86e-12	20.8181
FPR2	1.89199	6.14183	8.65892	9.43e-14	1.89e-12	20.8026
FMO5	-1.41192	8.00774	-8.65507	9.61e-14	1.92e-12	20.7837
RETNLB	-2.10981	8.09023	-8.64465	1.01e-13	2.01e-12	20.7325
ABCA12	2.33774	7.82846	8.64456	1.01e-13	2.01e-12	20.7321
P2RY13	1.38895	6.46664	8.64325	1.02e-13	2.02e-12	20.7257
VWF	1.33465	8.04419	8.63242	1.08e-13	2.12e-12	20.6725
CFH	1.50321	8.23503	8.60712	1.22e-13	2.39e-12	20.5483
TCF4	1.16085	8.92232	8.60317	1.24e-13	2.43e-12	20.529
TNFAIP6	2.46354	6.73788	8.60028	1.26e-13	2.46e-12	20.5148
FCN3	1.17866	7.32948	8.59945	1.27e-13	2.47e-12	20.5107
CHST5	-1.25221	9.37884	-8.59641	1.29e-13	2.51e-12	20.4958
BST2	1.00034	7.27751	8.578	1.41e-13	2.73e-12	20.4055
TLR1	1.1865	6.06405	8.56903	1.47e-13	2.84e-12	20.3616
TRPS1	1.06116	6.91069	8.56666	1.49e-13	2.87e-12	20.3499
CLEC4A	1.07039	5.90035	8.55087	1.61e-13	3.08e-12	20.2725
DUOXA2	2.74994	10.1592	8.54465	1.66e-13	3.17e-12	20.242
ZG16	-2.34128	9.61004	-8.54228	1.68e-13	3.2e-12	20.2304
VSIG2	-1.03472	9.57206	-8.53758	1.72e-13	3.27e-12	20.2074
HCK	1.088	8.26067	8.53555	1.74e-13	3.3e-12	20.1974
MCAM	1.1562	8.24539	8.50031	2.07e-13	3.88e-12	20.0248
PSAT1	1.10346	6.96249	8.49387	2.14e-13	3.99e-12	19.9932
ACKR4	1.08817	6.48988	8.49042	2.18e-13	4.04e-12	19.9763
S100A12	2.54327	6.73749	8.48139	2.28e-13	4.21e-12	19.9321
PNLIPRP2	-1.17651	5.72572	-8.47879	2.31e-13	4.26e-12	19.9194
IL1RN	1.57084	8.21736	8.4782	2.32e-13	4.26e-12	19.9165
CLDN8	-2.94805	5.94115	-8.46466	2.48e-13	4.54e-12	19.8502
HEPACAM2	-2.28832	8.14335	-8.46422	2.48e-13	4.55e-12	19.8481
TMTC1	1.04073	6.88205	8.45517	2.6e-13	4.75e-12	19.8038
PAPPA	1.05808	6.6673	8.43907	2.81e-13	5.1e-12	19.725
NRG1	1.29135	7.70204	8.43362	2.89e-13	5.22e-12	19.6984
GK3P	1.00842	8.59864	8.40954	3.26e-13	5.82e-12	19.5806
PLXNC1	1.06025	8.10141	8.39368	3.52e-13	6.27e-12	19.5031
DDIT4	1.05976	8.03847	8.37539	3.86e-13	6.84e-12	19.4137
KCNJ15	1.55369	6.47841	8.36797	4e-13	7.08e-12	19.3774
IGJ	1.23897	12.17	8.35759	4.21e-13	7.42e-12	19.3267
G0S2	1.49994	8.88564	8.35667	4.23e-13	7.44e-12	19.3222
COL4A2	1.09215	8.5705	8.33323	4.75e-13	8.28e-12	19.2077
EFCAB4B	-1.01556	7.97691	-8.32447	4.96e-13	8.63e-12	19.165
MOGAT2	-1.36434	8.1355	-8.31534	5.19e-13	8.99e-12	19.1204
MT1M	-1.68689	8.40933	-8.26146	6.78e-13	1.15e-11	18.8575
NABP1	1.0518	8.75815	8.24191	7.47e-13	1.25e-11	18.7623
PDGFRB	1.238	8.13431	8.226	8.08e-13	1.34e-11	18.6847
SCIMP	1.16964	7.33758	8.19965	9.21e-13	1.52e-11	18.5564
SERPINB3	3.4788	7.07403	8.18943	9.68e-13	1.59e-11	18.5066
ALOX5AP	1.10628	7.83419	8.15211	1.16e-12	1.87e-11	18.325
MT1H	-1.11404	8.39556	-8.1421	1.22e-12	1.96e-11	18.2763
SLC6A14	2.34428	10.4031	8.13502	1.27e-12	2.02e-11	18.2419
TM4SF18	1.0433	7.02329	8.11097	1.43e-12	2.26e-11	18.125
CYP7B1	1.07095	7.49902	8.08691	1.61e-12	2.52e-11	18.0082
PCOLCE	1.12867	9.06894	8.08401	1.63e-12	2.55e-11	17.9941
SPP1	2.11199	7.74241	8.08061	1.66e-12	2.59e-11	17.9776
COL15A1	1.23255	8.29707	8.05681	1.86e-12	2.89e-11	17.862
FAP	1.66337	5.71932	8.05025	1.92e-12	2.98e-11	17.8302
TCEA3	-1.11525	8.82058	-8.0491	1.94e-12	2.99e-11	17.8246
CCL18	1.99968	8.68127	8.04756	1.95e-12	3.01e-11	17.8171
PROK2	1.62018	7.97228	8.02855	2.14e-12	3.27e-11	17.7249
DENND5A	1.04074	7.8979	8.02077	2.23e-12	3.38e-11	17.6872
TMEM71	1.15824	6.16377	8.00707	2.38e-12	3.6e-11	17.6208
CD69	1.21724	7.01659	7.98099	2.71e-12	4.06e-11	17.4944
MEP1AP4	-1.05895	6.80321	-7.95047	3.14e-12	4.66e-11	17.3467
BICC1	1.17117	6.55032	7.94772	3.19e-12	4.71e-11	17.3333
FKBP10	1.02518	8.12075	7.94573	3.22e-12	4.75e-11	17.3237
FADS2	1.39955	8.68936	7.93935	3.32e-12	4.89e-11	17.2928
SPARC	1.17889	10.8767	7.92701	3.53e-12	5.16e-11	17.2331
MIR142	1.39281	5.97101	7.89902	4.05e-12	5.85e-11	17.0978
GPR116	1.2396	7.19727	7.89583	4.11e-12	5.93e-11	17.0824
LPHN2	1.20568	8.13695	7.86577	4.77e-12	6.78e-11	16.9372
FIBIN	1.00909	6.02251	7.85624	5e-12	7.08e-11	16.8912
MGAM	1.70929	6.58216	7.8354	5.53e-12	7.77e-11	16.7906
GPR97	1.13086	7.03287	7.81511	6.11e-12	8.52e-11	16.6927
P2RY10	1.18053	6.48484	7.81219	6.2e-12	8.63e-11	16.6787
CXCL6	1.31507	6.62457	7.81092	6.24e-12	8.67e-11	16.6725
MMP2	1.5349	9.54374	7.80325	6.48e-12	8.98e-11	16.6356
C3	1.5255	9.90679	7.802	6.52e-12	9.03e-11	16.6295
B3GNT7	-1.48061	9.44076	-7.79875	6.62e-12	9.17e-11	16.6139
IL6	2.26517	6.58362	7.7883	6.97e-12	9.64e-11	16.5635
MYO1A	-1.16141	9.27593	-7.78033	7.25e-12	1e-10	16.5251
RHOJ	1.1024	8.00528	7.77853	7.31e-12	1.01e-10	16.5164
KLK10	1.86224	8.73006	7.75448	8.22e-12	1.12e-10	16.4007
SLC11A1	1.30373	6.79266	7.7495	8.43e-12	1.15e-10	16.3767
LHFP	1.16664	9.13912	7.74862	8.46e-12	1.15e-10	16.3725
MIR192	-1.12722	7.80247	-7.74828	8.48e-12	1.16e-10	16.3708
PI3	1.48003	10.2968	7.73438	9.07e-12	1.23e-10	16.3039
CD37	1.17555	8.36863	7.72732	9.39e-12	1.27e-10	16.27
REP15	-1.51183	7.0072	-7.72352	9.57e-12	1.29e-10	16.2517
STAP1	1.44321	5.66026	7.70724	1.04e-11	1.39e-10	16.1734
CCL4L2	1.63226	7.29324	7.69646	1.09e-11	1.46e-10	16.1216
CLEC6A	1.13097	5.30277	7.68437	1.16e-11	1.54e-10	16.0636
SLC16A9	-1.39964	6.96602	-7.67976	1.18e-11	1.57e-10	16.0414
TMEM56	-1.03827	8.07337	-7.67215	1.23e-11	1.62e-10	16.0049
FGF7P2	1.09897	6.17507	7.66997	1.24e-11	1.64e-10	15.9944
C3AR1	1.24735	7.51428	7.66062	1.3e-11	1.71e-10	15.9496
CYYR1	1.07592	7.67435	7.65621	1.33e-11	1.74e-10	15.9284
LRMP	1.07138	7.36201	7.64505	1.4e-11	1.84e-10	15.8748
ANGPTL4	1.18267	7.66799	7.64089	1.43e-11	1.87e-10	15.8549
ITGA2	1.14574	9.95717	7.63178	1.5e-11	1.94e-10	15.8112
BIRC3	1.46444	8.94172	7.61244	1.65e-11	2.12e-10	15.7185
GLT1D1	1.34148	6.31868	7.60322	1.72e-11	2.21e-10	15.6743
CYP2B7P	-1.06112	5.7709	-7.60279	1.72e-11	2.21e-10	15.6723
GFPT2	1.30372	6.57623	7.57914	1.93e-11	2.46e-10	15.559
FPR3	1.1155	7.36199	7.57314	1.99e-11	2.53e-10	15.5303
SERPINB7	2.4125	6.64044	7.52187	2.56e-11	3.18e-10	15.2852
LGALS2	-1.1878	7.50878	-7.51608	2.63e-11	3.26e-10	15.2575
TFCP2L1	-1.06385	9.74157	-7.50143	2.82e-11	3.48e-10	15.1876
SLC16A6	1.0381	6.53219	7.47291	3.24e-11	3.95e-10	15.0515
NXPE2	-1.13395	7.0698	-7.45243	3.58e-11	4.33e-10	14.9539
NR3C2	-1.06198	8.81829	-7.44147	3.78e-11	4.54e-10	14.9017
SERPINF1	1.12907	8.05678	7.43669	3.86e-11	4.64e-10	14.8789
SNORA71B	-1.03029	10.1761	-7.43231	3.95e-11	4.73e-10	14.8581
SERPINB4	2.57169	6.57542	7.42276	4.13e-11	4.95e-10	14.8126
GZMK	1.36446	6.5201	7.41785	4.23e-11	5.05e-10	14.7892
F2RL2	1.1422	6.93936	7.41434	4.31e-11	5.12e-10	14.7725
APOL1	1.33554	8.91418	7.40809	4.44e-11	5.27e-10	14.7428
NXPE4	-1.80635	9.8419	-7.40711	4.46e-11	5.29e-10	14.7381
CCL3	1.11519	7.28243	7.40266	4.56e-11	5.4e-10	14.717
COL1A2	1.2713	9.67456	7.39896	4.64e-11	5.47e-10	14.6993
CFI	1.46968	6.87956	7.3815	5.05e-11	5.91e-10	14.6163
CD48	1.06387	8.09194	7.38143	5.05e-11	5.91e-10	14.616
COL5A2	1.05918	7.20766	7.38071	5.07e-11	5.93e-10	14.6126
SLC51B	-1.0238	8.32008	-7.3507	5.86e-11	6.8e-10	14.4701
SLC16A4	1.04352	6.6203	7.31686	6.9e-11	7.91e-10	14.3096
NID1	1.1124	8.15403	7.31665	6.9e-11	7.91e-10	14.3085
NEDD4L	-1.054	9.64509	-7.29779	7.56e-11	8.59e-10	14.2192
MT1F	-1.15722	10.6599	-7.28393	8.08e-11	9.14e-10	14.1535
DCN	1.39413	8.56802	7.2643	8.88e-11	9.95e-10	14.0607
BANK1	1.55392	6.86579	7.2488	9.57e-11	1.07e-09	13.9873
SLC10A5	-1.23118	7.43382	-7.22314	1.08e-10	1.19e-09	13.8661
CXCR4	1.09928	7.58584	7.22224	1.09e-10	1.2e-09	13.8618
B3GALT5	-1.20201	8.40033	-7.20948	1.16e-10	1.27e-09	13.8016
MT1G	-1.10684	11.0974	-7.20817	1.16e-10	1.28e-09	13.7954
GLT8D2	1.07884	7.27093	7.20456	1.18e-10	1.3e-09	13.7784
ACSL1	1.40022	8.35533	7.20129	1.2e-10	1.32e-09	13.763
ARHGAP29	1.0283	6.15903	7.18338	1.31e-10	1.42e-09	13.6785
AKT3	1.01209	7.11251	7.15609	1.49e-10	1.6e-09	13.5499
RGS1	1.28461	6.40914	7.11335	1.83e-10	1.94e-09	13.3488
DSG3	1.98661	7.48818	7.10638	1.9e-10	1.99e-09	13.3161
CAPN9	-1.03871	7.11482	-7.09099	2.04e-10	2.14e-09	13.2437
B4GALNT2	-1.09368	6.84677	-7.0821	2.13e-10	2.22e-09	13.202
CES3	-1.06439	8.7116	-7.06686	2.29e-10	2.37e-09	13.1305
CCL4	1.24661	5.22711	7.04376	2.56e-10	2.63e-09	13.0222
FFAR2	1.48712	6.7727	7.02156	2.84e-10	2.89e-09	12.9183
NOS2	1.89677	10.4387	7.01084	2.99e-10	3.03e-09	12.8681
TLR2	1.00279	6.3606	6.9971	3.2e-10	3.22e-09	12.8038
DUOX2	2.44248	11.4997	6.97	3.64e-10	3.64e-09	12.6772
C4BPB	1.34638	6.85029	6.96144	3.79e-10	3.78e-09	12.6372
CXCL5	1.4649	7.85496	6.95054	3.99e-10	3.97e-09	12.5864
GUCY1A3	1.19504	7.01203	6.90248	5.01e-10	4.9e-09	12.3624
SAA2-SAA4	1.08843	5.99318	6.88606	5.42e-10	5.28e-09	12.286
HCAR3	2.09448	7.11636	6.87912	5.6e-10	5.43e-09	12.2538
FDCSP	1.8361	6.97255	6.85437	6.29e-10	6.07e-09	12.1388
TNFRSF11B	1.30766	7.53815	6.83427	6.92e-10	6.64e-09	12.0455
LRRC19	-1.38058	7.96861	-6.83089	7.03e-10	6.72e-09	12.0299
IL18RAP	1.16952	5.91356	6.82135	7.36e-10	7.01e-09	11.9856
SERPINB5	1.82875	8.84193	6.79597	8.3e-10	7.85e-09	11.868
COL1A1	1.18577	10.0137	6.78811	8.61e-10	8.11e-09	11.8317
SAA2	1.1599	6.70815	6.74608	1.05e-09	9.75e-09	11.6374
RGS2	1.10223	8.39545	6.74586	1.05e-09	9.76e-09	11.6364
SAA1	1.30434	6.50225	6.73619	1.1e-09	1.02e-08	11.5918
LCN2	1.6406	11.3389	6.73531	1.1e-09	1.02e-08	11.5877
REG1A	3.039	9.32287	6.70187	1.29e-09	1.18e-08	11.4335
CLEC4E	1.19009	4.91426	6.69811	1.32e-09	1.2e-08	11.4162
SPARCL1	1.2142	9.11356	6.69161	1.36e-09	1.23e-08	11.3863
MEP1A	-1.53215	9.88641	-6.69003	1.37e-09	1.24e-08	11.379
LOC728715	1.02279	5.6425	6.68991	1.37e-09	1.24e-08	11.3785
NTRK2	-1.02164	6.06265	-6.67688	1.45e-09	1.31e-08	11.3185
B3GALT1	-1.46923	8.10622	-6.66617	1.53e-09	1.37e-08	11.2693
HOXB13	-1.22353	8.70036	-6.62935	1.82e-09	1.62e-08	11.1002
THBS2	1.27716	7.59818	6.60188	2.07e-09	1.82e-08	10.9743
NRCAM	1.00556	5.34979	6.5767	2.32e-09	2.03e-08	10.8591
SCIN	-1.06029	7.37788	-6.57554	2.34e-09	2.04e-08	10.8538
CD163	1.02755	6.52511	6.56463	2.46e-09	2.13e-08	10.8039
CYP2B6	-1.25306	6.58546	-6.56179	2.49e-09	2.16e-08	10.7909
OSM	1.47046	7.0875	6.53278	2.85e-09	2.45e-08	10.6585
APOBEC3A	1.21847	7.6267	6.52185	3e-09	2.56e-08	10.6086
PARP15	1.07325	6.33129	6.5144	3.11e-09	2.64e-08	10.5747
KRT6B	1.07902	7.41019	6.50124	3.3e-09	2.79e-08	10.5148
ME1	1.1297	9.27566	6.49552	3.39e-09	2.86e-08	10.4887
IL24	1.57867	6.347	6.37808	5.84e-09	4.71e-08	9.95616
TLR10	1.1105	6.05767	6.33124	7.25e-09	5.76e-08	9.74485
ATOH1	-1.30175	9.80014	-6.23805	1.11e-08	8.57e-08	9.32644
GPR126	1.20176	9.06529	6.17341	1.5e-08	1.12e-07	9.03774
MS4A1	1.77169	8.33689	6.17277	1.5e-08	1.12e-07	9.03491
GPNMB	1.01176	8.56958	6.1359	1.77e-08	1.31e-07	8.87082
CFTR	-1.03596	9.38282	-6.11214	1.98e-08	1.45e-07	8.76532
GHR	-1.12144	6.05918	-6.08431	2.24e-08	1.63e-07	8.64201
COL3A1	1.07216	9.86829	6.06402	2.46e-08	1.78e-07	8.55222
FCRL3	1.02077	6.56866	6.03152	2.85e-08	2.03e-07	8.40874
PI15	2.21406	7.3335	6.02688	2.91e-08	2.07e-07	8.38829
MS4A8	-1.00568	7.09299	-5.99519	3.35e-08	2.36e-07	8.24874
DEFB4B	1.2461	6.22708	5.97606	3.66e-08	2.56e-07	8.16468
DKK1	1.33656	6.01689	5.96774	3.8e-08	2.65e-07	8.12815
FABP1	-1.17321	9.66277	-5.96519	3.84e-08	2.67e-07	8.11699
NXPE1	-1.43912	10.283	-5.9553	4.01e-08	2.79e-07	8.07359
HCAR2	1.55742	7.20573	5.91754	4.76e-08	3.25e-07	7.90832
KLK6	1.60696	6.79995	5.90879	4.95e-08	3.37e-07	7.87009
C9orf152	-1.04723	8.47501	-5.84745	6.51e-08	4.33e-07	7.60278
BTNL8	-1.01721	8.63155	-5.80716	7.78e-08	5.1e-07	7.428
SLC26A3	-1.60611	11.6758	-5.79094	8.36e-08	5.44e-07	7.35777
AZGP1	1.08909	7.8166	5.72453	1.12e-07	7.13e-07	7.0713
FER1L6	-1.03304	7.91208	-5.7229	1.13e-07	7.18e-07	7.0643
C4BPA	1.71773	7.35977	5.71073	1.19e-07	7.54e-07	7.01198
MMRN1	1.09647	7.20693	5.70855	1.2e-07	7.6e-07	7.00262
TFPI2	1.3036	5.74011	5.68091	1.36e-07	8.51e-07	6.88403
VNN1	1.65812	8.87074	5.65964	1.49e-07	9.27e-07	6.79298
GPR110	1.3859	7.03116	5.63559	1.66e-07	1.02e-06	6.69021
CD177	-1.56819	10.4504	-5.61328	1.83e-07	1.12e-06	6.59512
REG1B	2.74391	7.60904	5.49422	3.08e-07	1.79e-06	6.0908
CLCA1	-2.33988	10.0893	-5.48739	3.17e-07	1.84e-06	6.06204
GALNT8	-1.00132	7.89609	-5.28953	7.41e-07	4.01e-06	5.23731
CD22	1.25055	7.65923	5.24798	8.84e-07	4.69e-06	5.06623
CR2	1.6295	6.71164	5.20438	1.06e-06	5.53e-06	4.8875
NMUR2	1.57772	6.81632	5.17426	1.21e-06	6.19e-06	4.76455
SLC26A4	1.04906	5.45286	5.16753	1.24e-06	6.35e-06	4.73711
SLCO1B3	1.69799	6.1809	5.14998	1.34e-06	6.79e-06	4.66571
MS4A12	-1.76677	10.0865	-5.12639	1.48e-06	7.44e-06	4.56997
CYR61	1.04328	7.63646	5.09561	1.68e-06	8.33e-06	4.4454
UGT2B11	-1.05312	8.66029	-5.09529	1.68e-06	8.34e-06	4.44409
GLDN	-1.22742	7.12151	-4.90478	3.69e-06	1.7e-05	3.68295
TCL1A	1.01134	6.78137	4.7302	7.49e-06	3.23e-05	3.00097
FCGBP	-1.08631	11.5069	-4.65336	1.02e-05	4.27e-05	2.70568
GCG	-1.20881	8.59569	-4.465	2.13e-05	8.32e-05	1.99504
REG4	1.06343	10.3145	4.3213	3.71e-05	0.000136841	1.46601
ALDOB	1.42084	9.09615	4.28061	4.33e-05	0.000157278	1.31832
TM4SF20	1.45185	6.94117	4.24555	4.94e-05	0.000177192	1.19184
CCL19	1.02533	8.33496	4.21386	5.57e-05	0.000196993	1.07813
ITLN1	-1.59459	10.0822	-4.19169	6.05e-05	0.000212498	0.998948
REG3A	1.72379	8.02119	3.68607	0.000372649	0.00108594	-0.725156
DMBT1	1.21683	10.7683	3.57721	0.000540436	0.00150667	-1.07474
UGT2B15	-1.17484	8.52671	-3.20411	0.00182584	0.00442574	-2.21041
UGT2B17	-1.042	6.5266	-2.98253	0.00360311	0.00800731	-2.8369

## Sheet: B
logFC	AveExpr	t	P.Value	adj.P.Val	B
ATHL1	0.722624	7.33523	4.16341985114305	0.000455963234154569	0.484408	-0.341961
SH2B3	0.693515	8.43231	4.10691227975311	0.000521287278059413	0.484408	-0.438928
SEMA4A	0.595439	7.48336	3.98331778995386	0.000698576559569696	0.484408	-0.651669
CPXM1	0.702525	7.02108	3.98277746713588	0.000699470780254167	0.484408	-0.652601
TPSB2	0.958458	7.68227	3.9700112837724	0.000720933375330464	0.484408	-0.67462
SULF1	0.728151	7.09065	3.93430824998112	0.000784501908481087	0.484408	-0.736235
GPR124	0.673656	7.0794	3.86847805872118	0.000916679321536057	0.484408	-0.849967
CPA3	1.17248	7.83351	3.84996116404744	0.00095769423157994	0.484408	-0.881982
PLA2G4C	0.581238	7.04548	3.78165948766488	0.00112535926924839	0.484408	-1.00014
DOCK2	0.872823	8.26006	3.70918775558702	0.0013351287468268	0.484408	-1.12559
HLA-DOA	0.680246	7.74592	3.58844372206052	0.00177370931636288	0.484408	-1.33462
HDC	0.843085	7.25711	3.47755038153171	0.00230006310866659	0.484408	-1.52637
ABI3BP	0.74781	7.24665	3.45473885777632	0.00242601855223523	0.484408	-1.56577
TNC	1.41498	7.78507	3.45379464739449	0.00243137547853749	0.484408	-1.5674
LAMC3	0.695229	7.17507	3.41186393649724	0.00268133365764663	0.484408	-1.63975
COL4A2	0.740551	7.37382	3.4025788168335	0.00274000129154895	0.484408	-1.65576
CXCL12	0.606796	7.20909	3.39644899093154	0.00277941960628683	0.484408	-1.66633
GRAMD1A	0.71711	7.48455	3.37809856536473	0.00290077283256582	0.484408	-1.69795
SPARC	0.840708	8.59016	3.35926392385001	0.00303071875464277	0.484408	-1.73039
CYP26B1	0.644852	6.73072	3.35378470781989	0.00306957928394535	0.484408	-1.73982
PCOLCE	0.971047	7.78618	3.26484208514384	0.00377287244594726	0.484408	-1.89264
GREM1	0.885008	6.96441	3.25583314604816	0.0038523169410213	0.484408	-1.90809
FERMT2	0.642446	7.92373	3.25037228350025	0.00390126409125867	0.484408	-1.91745
FAP	0.621469	6.67404	3.2147530780447	0.00423571525029108	0.484408	-1.97843
CCL19	1.68676	8.47414	3.20464776943394	0.00433557508437874	0.484408	-1.99572
COL7A1	1.22517	7.57905	3.20191368919505	0.00436298421066071	0.484408	-2.00039
IL2RB	0.606929	7.18047	3.18491642168742	0.00453719917559132	0.484408	-2.02943
CXCL13	1.19741	7.41976	3.16463616990466	0.00475391765709684	0.484408	-2.06404
RASIP1	0.695618	7.18519	3.15067152458422	0.00490895442736706	0.484408	-2.08785
CCDC3	0.719507	6.95348	3.13754049150907	0.00505920452392378	0.484408	-2.11022
POU2AF1	0.928566	7.79684	3.11062875979603	0.00538119770156068	0.484408	-2.15601
COL6A2	0.597959	6.89711	3.09804816763494	0.00553844797819213	0.484408	-2.17738
RAI14	0.883379	8.25813	3.08448390339971	0.0057129760040426	0.484408	-2.20041
SERPINH1	0.594065	8.33383	3.0751265827978	0.00583646331809681	0.484408	-2.21628
CD93	1.01283	7.98827	3.06912413962823	0.00591703157180105	0.484408	-2.22646
CRIP2	0.813279	7.77079	3.05838057139588	0.00606393019512014	0.484408	-2.24466
CRISPLD2	0.98632	8.48146	3.05379078771279	0.00612775594610427	0.484408	-2.25243
COL15A1	0.972846	7.24408	3.04814808537054	0.00620711340270475	0.484408	-2.26198
AKR1B1	0.600533	8.66002	3.04366113160418	0.00627092431645827	0.484408	-2.26957
CCL21	1.55293	8.02254	3.03806032140086	0.0063514650968422	0.484408	-2.27904
ARHGAP30	0.611429	7.06601	3.01359305804175	0.00671516876480606	0.484408	-2.32038
FILIP1L	0.926979	7.63187	3.00188500906888	0.00689623522596506	0.484408	-2.34012
LILRB3	0.670986	9.59487	2.98886599887957	0.00710310053053648	0.484408	-2.36206
SELL	0.907333	7.27766	2.9705071192215	0.00740499621289824	0.484408	-2.39295
LDB2	0.717695	7.92961	2.96261484577481	0.00753853942897059	0.484408	-2.40622
IGFBP7	1.33429	9.88611	2.96038010783951	0.00757677182066403	0.484408	-2.40997
COL5A1	1.02608	8.51576	2.95729534009835	0.00762985321828658	0.484408	-2.41515
CYBRD1	0.641382	8.00792	2.94883193847886	0.00777733071251878	0.484408	-2.42936
AEBP1	1.16627	8.33442	2.92477794156101	0.00821158893644875	0.484408	-2.46968
LGALS1	0.858446	9.95809	2.92085961160061	0.0082844985289225	0.484408	-2.47624
CTSG	1.19156	7.83151	2.91860386020043	0.00832675342127967	0.484408	-2.48002
CTSK	1.25057	8.58074	2.91437780864327	0.00840647351393488	0.484408	-2.48709
COL6A1	1.14818	8.74012	2.90739854206861	0.00853973603693504	0.484408	-2.49876
SNCAIP	0.61364	7.2418	2.9037224811601	0.00861073937081206	0.484408	-2.5049
ARID3A	0.639968	7.41658	2.89818788634676	0.00871870927660419	0.484408	-2.51415
C1S	0.724604	7.99354	2.89035418547697	0.00887375167072745	0.484408	-2.52722
ANGPTL2	1.14745	7.9531	2.88719184604068	0.0089370855292934	0.484408	-2.5325
TEK	0.593416	7.13952	2.88408490895405	0.00899973149799077	0.484408	-2.53768
TPM2	0.989631	9.31491	2.8524142919211	0.00966277390366595	0.484408	-2.59041
FCN1	1.09163	7.52595	2.84811441986232	0.00975631955688992	0.484408	-2.59755
CDH5	0.808693	7.23186	2.83663215894159	0.0100103835959033	0.484408	-2.61662
PTGS2	0.648219	6.98695	2.83009383476793	0.0101578674301321	0.484408	-2.62746
ECSCR	0.630154	7.21868	2.82902048440037	0.0101822763057968	0.484408	-2.62924
MAP4K1	0.605732	7.35988	2.8284776190052	0.010194642838312	0.484408	-2.63014
SOX18	1.09844	7.94387	2.80600561339203	0.0107193293247608	0.484408	-2.66735
LHFP	0.582037	7.5649	2.79875362032073	0.0108940823985173	0.484408	-2.67933
ATP2B4	0.593581	7.46451	2.79495717365207	0.0109866464133463	0.484408	-2.6856
RSPO3	0.658608	6.76949	2.78509671702037	0.0112305770636575	0.484408	-2.70188
PTPRM	0.597435	7.28876	2.78489517007595	0.0112356164093581	0.484408	-2.70221
MSN	1.00164	9.10728	2.7831054252682	0.0112804606102997	0.484408	-2.70516
TGFBI	1.02957	10.5356	2.77835641932882	0.0114002806475932	0.484408	-2.71299
COL1A1	1.38301	8.7284	2.77610826573653	0.0114574246637919	0.484408	-2.7167
CSF3R	0.657645	7.06151	2.77119721793707	0.0115832048901838	0.484408	-2.72479
FSTL1	1.12113	8.21611	2.76839300500374	0.0116556140503845	0.484408	-2.7294
FOLR3	0.620979	6.5311	2.76097075245245	0.0118493534000121	0.484408	-2.74162
COL1A2	1.39263	9.11567	2.75744883709904	0.0119423525708784	0.484408	-2.74741
VASN	0.936363	7.66557	2.73645180546285	0.0125113659869577	0.484408	-2.78188
CORO1A	0.721996	7.96278	2.73641266083458	0.012512450470353	0.484408	-2.78195
THBS2	0.73907	6.70962	2.71834102979788	0.0130227666400035	0.484408	-2.81154
SVEP1	0.67476	7.29785	2.71778114309225	0.0130388883018349	0.484408	-2.81246
PEA15	0.74102	8.78332	2.71268816280927	0.0131864104357806	0.484408	-2.82079
APBB1IP	0.819842	8.06591	2.70085006322194	0.0135354513749504	0.484408	-2.84012
MFGE8	1.01499	9.50284	2.69689879555212	0.0136538899276291	0.484408	-2.84657
SEMA4D	0.872452	8.48853	2.69014953250219	0.0138584729091038	0.484408	-2.85757
TSPAN9	0.71248	8.32666	2.68754131690496	0.0139383082390555	0.484408	-2.86182
COL6A3	1.27245	9.13779	2.68715804310007	0.0139500765854959	0.484408	-2.86245
ENPP2	0.750471	7.63033	2.67731912172933	0.0142554200795659	0.484408	-2.87846
VIM	0.937458	9.52762	2.66047138717948	0.0147930183772213	0.484408	-2.90584
JAM3	0.625869	8.03574	2.64699386929913	0.0152368209810113	0.484408	-2.92769
TAGLN	0.832061	7.41943	2.64585384703766	0.0152749325298914	0.484408	-2.92954
BTG2	0.886999	9.34088	2.64017892643809	0.0154659917850706	0.484408	-2.93873
OLFML2B	0.630533	7.15745	2.63215176478009	0.0157401017340014	0.484408	-2.95171
HCLS1	0.911911	9.02204	2.62999426196449	0.0158145539720592	0.484408	-2.9552
SPOCK2	1.00323	8.07083	2.61937249539276	0.0161859659927126	0.484408	-2.97235
DPYSL2	0.690986	9.04303	2.61810933632126	0.0162306783775607	0.484408	-2.97438
TBC1D10C	0.651318	7.72556	2.61779541839242	0.0162418082727614	0.484408	-2.97489
MYH10	0.720896	7.62725	2.60729668746209	0.0166182103074845	0.484408	-2.99181
CYTH4	0.67752	7.67215	2.60534801306086	0.0166889729467733	0.484408	-2.99495
CD2	0.672345	7.9675	2.60323181773603	0.0167661403348879	0.484408	-2.99835
ARHGEF6	0.707738	8.33473	2.59963725332367	0.0168979876100159	0.484408	-3.00414
C4orf7	0.985624	7.01984	2.59707275793686	0.0169926485754285	0.484408	-3.00826
PIM2	1.3021	9.01033	2.59348829097126	0.0171257958978723	0.484408	-3.01402
MXRA5	1.0138	8.93588	2.58118052067496	0.0175904894651475	0.484408	-3.03378
ITGA5	0.866145	7.68095	2.58086123757731	0.0176027007767583	0.484408	-3.0343
GIMAP4	0.75545	9.29237	2.57808327730312	0.0177092837416221	0.484408	-3.03875
KIAA1199	1.09407	7.09045	2.57215826049154	0.0179386419000825	0.484408	-3.04824
PTGES	0.752829	7.03826	2.56723527890137	0.0181313322569804	0.484408	-3.05613
LUM	0.683252	8.00516	2.55899845302585	0.0184580856583162	0.484408	-3.0693
SPARCL1	0.972577	8.51155	2.55690903230061	0.0185418477676508	0.484408	-3.07264
WAS	0.961329	8.96579	2.55462162218615	0.0186339562423521	0.484408	-3.07629
FAM65A	0.645868	7.65449	2.55356420340518	0.0186766809935786	0.484408	-3.07798
IGFBP5	1.64048	9.41455	2.5371671385308	0.0193510804733814	0.484408	-3.10413
UCP2	0.666108	8.69538	2.53531754172857	0.0194285705014351	0.484408	-3.10707
DPYSL3	0.961431	8.24746	2.53503484117972	0.0194404400230045	0.484408	-3.10752
GNAI2	0.765158	8.7396	2.53160069861381	0.0195851705921525	0.484408	-3.11299
COL5A2	0.794936	8.23739	2.53108022291309	0.019607193777118	0.484408	-3.11382
RAB31	0.871244	8.84884	2.52641708802722	0.0198055458551712	0.484408	-3.12123
ECGF1	0.647293	8.7097	2.52523724966993	0.0198560289383319	0.484408	-3.12311
FAM113B	0.746121	7.78582	2.52347158340649	0.019931803776193	0.484408	-3.12592
MGP	0.745948	7.72202	2.51742369000271	0.0201934114959357	0.484408	-3.13552
COL3A1	0.992353	9.45473	2.50818280748513	0.0205993517914603	0.484408	-3.15018
VIP	0.657393	6.84377	2.5010265818265	0.0209189491565227	0.484408	-3.16151
FNBP1	0.632571	8.81711	2.50014046906393	0.0209588441417542	0.484408	-3.16291
SYT11	0.590332	7.34233	2.49641596996488	0.0211273096226591	0.484408	-3.1688
GPR116	0.876446	7.67748	2.49025028330015	0.0214089795856401	0.484408	-3.17855
CCL2	0.879955	8.03383	2.48380472990884	0.0217071841958275	0.484408	-3.18873
LAX1	0.795676	7.49329	2.47487307359749	0.0221268257312998	0.484408	-3.20281
STK4	0.611937	9.45678	2.47120325625314	0.0223014322931534	0.484408	-3.20859
TPST2	0.599056	8.08079	2.47058175252917	0.0223311298952337	0.484408	-3.20957
PTGDS	1.26071	7.9904	2.45771583448922	0.022954257028412	0.484408	-3.2298
PRKCDBP	0.821747	8.574	2.45764234037523	0.0229578626464273	0.484408	-3.22992
DRAM1	0.758238	7.92692	2.45594974311589	0.0230410476319006	0.484408	-3.23257
MYH11	0.74516	8.08388	2.45118608177693	0.0232766746098158	0.484408	-3.24005
CD52	0.690163	7.64427	2.44788161697221	0.0234414415928557	0.484408	-3.24523
LAPTM5	0.598823	8.06265	2.44698492160859	0.0234863396061565	0.484408	-3.24664
RFTN1	0.890753	8.69122	2.44055090425464	0.0238108509383309	0.484408	-3.25672
THY1	1.16064	8.44061	2.43854693367635	0.0239127743596729	0.484408	-3.25985
LAG3	0.611507	7.22398	2.43702900544658	0.0239902474623264	0.484408	-3.26223
SLC2A3	1.17276	8.56376	2.43156621712713	0.0242709983822305	0.484408	-3.27077
CD74	0.757642	11.5296	2.4301127294144	0.0243462111751123	0.484408	-3.27304
STMN3	0.664894	8.15703	2.42772828060592	0.0244700676146587	0.484408	-3.27677
C2	0.66751	7.67216	2.42643973684425	0.0245372426544321	0.484408	-3.27878
NPTX2	1.04605	7.40818	2.42262022234494	0.0247373724516796	0.484408	-3.28474
ARHGDIB	0.697206	10.9649	2.41879408831033	0.0249393696516082	0.484408	-3.29071
CHI3L1	0.785237	7.05195	2.41591448224503	0.0250924056629555	0.484408	-3.2952
ENG	0.82502	7.74414	2.40682540615715	0.0255811842820419	0.484408	-3.30935
LILRB2	0.644799	7.27949	2.40184971890344	0.0258524894615295	0.484408	-3.31709
EVL	0.796827	9.21848	2.39895621427185	0.0260114868131706	0.484408	-3.32158
CHST15	0.805977	8.32984	2.39823043265423	0.0260515104275816	0.484408	-3.32271
ICOS	0.580737	7.01748	2.39700667813709	0.0261191244413265	0.484408	-3.32461
GOLGA8B	0.684165	7.8593	2.38559208174712	0.0267576818326361	0.484408	-3.34231
PLAU	1.30452	8.21669	2.38307333737652	0.026900521166875	0.484408	-3.34621
ITGB2	1.02084	10.1445	2.38163316029092	0.0269825115719974	0.484408	-3.34844
PECAM1	1.12438	8.47137	2.36489112911742	0.0279527859283753	0.484408	-3.37431
PDGFRB	0.89304	8.29412	2.35964444067253	0.02826343708336	0.484408	-3.3824
TMEM158	1.3115	9.07379	2.34970440613147	0.0288607473434611	0.484408	-3.3977
ALPL	1.07395	8.03505	2.34555469131982	0.0291135439186367	0.484408	-3.40408
WNT5A	0.651515	6.91354	2.34056038898884	0.0294205036480586	0.484408	-3.41175
ACTN1	0.613715	8.95396	2.33388500938953	0.0298354527678852	0.484408	-3.42199
CEBPB	0.87514	9.84989	2.32657072290818	0.0302963132775305	0.484408	-3.43319
PLCG2	0.764992	8.2153	2.32409281751971	0.0304539247426394	0.484408	-3.43698
PTRF	0.970596	9.21614	2.32091741422185	0.0306570069033739	0.484408	-3.44184
CREB3L2	0.647802	9.25081	2.31976483705112	0.0307310279643326	0.484408	-3.4436
SHANK3	0.612204	7.29228	2.31720945598303	0.0308957279974578	0.484408	-3.44751
CALU	0.580969	8.38212	2.3080813633029	0.0314907175002783	0.484408	-3.46143
IFI30	0.618702	8.6046	2.30803493393144	0.0314937706599556	0.484408	-3.4615
PCNX	0.658888	8.51633	2.3075016874532	0.0315288560826047	0.484408	-3.46232
CYGB	0.636834	9.12015	2.29837373935193	0.0321350437871484	0.484408	-3.47621
EMR2	0.784917	7.58509	2.29712976219921	0.0322184816235977	0.484408	-3.47811
LCP1	1.00624	9.87219	2.29526247427515	0.0323441011626709	0.484408	-3.48094
RAC2	0.844956	10.1686	2.29312589291342	0.0324883895503729	0.484408	-3.48419
FAM46C	0.910797	10.2949	2.29023916861328	0.0326842769070121	0.484408	-3.48858
BGN	1.60736	9.45196	2.28503854494696	0.0330399228482341	0.484889	-3.49647
CD7	0.727572	7.88421	2.28377628514199	0.0331267773818507	0.484895	-3.49838
PSCD4	0.630172	8.06415	2.28032921614853	0.0333650355175411	0.48592	-3.5036
STC1	0.726852	6.91342	2.26880271344184	0.034173210206689	0.487791	-3.52104
DYSF	0.798496	7.57895	2.25702397806493	0.0350175882723936	0.487942	-3.53882
IGFBP4	0.635956	9.98735	2.25494812927307	0.035168366074696	0.48815	-3.54194
BASP1	0.966031	9.35693	2.24601582721312	0.0358239667747779	0.489877	-3.55538
NNMT	0.70004	7.19832	2.23928600740465	0.0363252824564572	0.490384	-3.56549
ZYX	0.607969	8.05395	2.22234244994405	0.0376159800750697	0.491073	-3.59087
MFAP4	0.605341	8.72947	2.22092698201729	0.0377256794799067	0.491073	-3.59298
DARC	0.872716	8.1217	2.21500933420448	0.0381874705736076	0.493712	-3.60182
IFITM3	0.79092	11.0973	2.2047704276906	0.038998677434583	0.495011	-3.61707
FGR	0.626051	7.33526	2.20103257719947	0.0392987135177916	0.495339	-3.62263
COL4A1	1.23169	9.7616	2.19579417442602	0.0397227391868895	0.496287	-3.63042
APLNR	0.623125	7.59502	2.18413929116781	0.0406811391054778	0.496287	-3.6477
LAMC1	0.672368	8.78256	2.16564271282525	0.042245395931631	0.497764	-3.67502
DDX5	0.61145	10.5425	2.16229932317375	0.0425339096653705	0.498136	-3.67995
VWF	1.30732	9.59364	2.16064179085755	0.0426776066492762	0.499	-3.68239
FSCN1	0.639055	8.00921	2.15082988920286	0.0435372933215417	0.499988	-3.69681
LPHN2	0.649265	7.53936	2.15043909328835	0.0435718565595588	0.499988	-3.69739
CD19	1.06151	7.73902	2.14456508355292	0.0440943784862303	0.501361	-3.706
IFITM2	0.76773	11.4564	2.13865054299604	0.0446262366381213	0.501551	-3.71466
UBD	1.13627	8.4568	2.1300716204211	0.0454080133477976	0.503564	-3.72721
STAT2	0.592671	9.53011	2.12828170062212	0.0455726788276396	0.503931	-3.72982
HTRA1	0.629593	7.92922	2.0835906202696	0.0498630056367747	0.510298	-3.79465
GO:1904645	response to amyloid-beta	GO_BiologicalProcess-EBI-UniProt-GOA-ACAP-ARAP_13.05.2021_00h00	2.74554e-05	0.00895045	11.1111	6
GO:0033273	response to vitamin	GO_BiologicalProcess-EBI-UniProt-GOA-ACAP-ARAP_13.05.2021_00h00	2.75878e-05	0.00896603	7.33945	8
GO:0030199	collagen fibril organization	GO_BiologicalProcess-EBI-UniProt-GOA-ACAP-ARAP_13.05.2021_00h00	2.94736e-05	0.00954944	7.27273	8
GO:0051924	regulation of calcium ion transport	GO_BiologicalProcess-EBI-UniProt-GOA-ACAP-ARAP_13.05.2021_00h00	3.26819e-05	0.0105562	4.61538	12
GO:0050729	positive regulation of inflammatory response	GO_BiologicalProcess-EBI-UniProt-GOA-ACAP-ARAP_13.05.2021_00h00	3.32051e-05	0.010692	6.2069	9
GO:0001618	virus receptor activity	GO_BiologicalProcess-EBI-UniProt-GOA-ACAP-ARAP_13.05.2021_00h00	3.33863e-05	0.010717	8.53659	7
GO:0070374	positive regulation of ERK1 and ERK2 cascade	GO_BiologicalProcess-EBI-UniProt-GOA-ACAP-ARAP_13.05.2021_00h00	3.37637e-05	0.0108044	5	11
GO:0061028	establishment of endothelial barrier	GO_BiologicalProcess-EBI-UniProt-GOA-ACAP-ARAP_13.05.2021_00h00	3.38899e-05	0.0108109	10.7143	6
GO:0060541	respiratory system development	GO_BiologicalProcess-EBI-UniProt-GOA-ACAP-ARAP_13.05.2021_00h00	3.51942e-05	0.0111918	4.97738	11
GO:0010517	regulation of phospholipase activity	GO_BiologicalProcess-EBI-UniProt-GOA-ACAP-ARAP_13.05.2021_00h00	3.90446e-05	0.0123381	8.33333	7
GO:0043112	receptor metabolic process	GO_BiologicalProcess-EBI-UniProt-GOA-ACAP-ARAP_13.05.2021_00h00	4.18023e-05	0.0131259	5.37634	10
GO:0043491	protein kinase B signaling	GO_BiologicalProcess-EBI-UniProt-GOA-ACAP-ARAP_13.05.2021_00h00	4.23228e-05	0.013247	4.49438	12
GO:0032609	interferon-gamma production	GO_BiologicalProcess-EBI-UniProt-GOA-ACAP-ARAP_13.05.2021_00h00	4.32007e-05	0.0134786	6.89655	8
GO:0032649	regulation of interferon-gamma production	GO_BiologicalProcess-EBI-UniProt-GOA-ACAP-ARAP_13.05.2021_00h00	4.32007e-05	0.0134786	6.89655	8
GO:0002246	wound healing involved in inflammatory response	GO_BiologicalProcess-EBI-UniProt-GOA-ACAP-ARAP_13.05.2021_00h00	4.44355e-05	0.0138194	42.8571	3
GO:0010959	regulation of metal ion transport	GO_BiologicalProcess-EBI-UniProt-GOA-ACAP-ARAP_13.05.2021_00h00	4.54943e-05	0.0141032	4.46097	12
GO:0045580	regulation of T cell differentiation	GO_BiologicalProcess-EBI-UniProt-GOA-ACAP-ARAP_13.05.2021_00h00	4.80727e-05	0.0148545	5.92105	9
GO:0032695	negative regulation of interleukin-12 production	GO_BiologicalProcess-EBI-UniProt-GOA-ACAP-ARAP_13.05.2021_00h00	4.8437e-05	0.0149186	21.0526	4
GO:0010595	positive regulation of endothelial cell migration	GO_BiologicalProcess-EBI-UniProt-GOA-ACAP-ARAP_13.05.2021_00h00	4.88195e-05	0.0149876	6.77966	8
GO:0001822	kidney development	GO_BiologicalProcess-EBI-UniProt-GOA-ACAP-ARAP_13.05.2021_00h00	5.06639e-05	0.0153005	4.11392	13
GO:0051897	positive regulation of protein kinase B signaling	GO_BiologicalProcess-EBI-UniProt-GOA-ACAP-ARAP_13.05.2021_00h00	5.00461e-05	0.0153141	5.26316	10
GO:0002819	regulation of adaptive immune response	GO_BiologicalProcess-EBI-UniProt-GOA-ACAP-ARAP_13.05.2021_00h00	5.00461e-05	0.0153141	5.26316	10
GO:0043536	positive regulation of blood vessel endothelial cell migration	GO_BiologicalProcess-EBI-UniProt-GOA-ACAP-ARAP_13.05.2021_00h00	5.03802e-05	0.0153156	10	6
GO:0002886	regulation of myeloid leukocyte mediated immunity	GO_BiologicalProcess-EBI-UniProt-GOA-ACAP-ARAP_13.05.2021_00h00	5.03802e-05	0.0153156	10	6
GO:0002820	negative regulation of adaptive immune response	GO_BiologicalProcess-EBI-UniProt-GOA-ACAP-ARAP_13.05.2021_00h00	5.03802e-05	0.0153156	10	6
GO:0002920	regulation of humoral immune response	GO_BiologicalProcess-EBI-UniProt-GOA-ACAP-ARAP_13.05.2021_00h00	5.05967e-05	0.0153308	5.88235	9
GO:0002691	regulation of cellular extravasation	GO_BiologicalProcess-EBI-UniProt-GOA-ACAP-ARAP_13.05.2021_00h00	5.02703e-05	0.0153324	13.5135	5
GO:0071675	regulation of mononuclear cell migration	GO_BiologicalProcess-EBI-UniProt-GOA-ACAP-ARAP_13.05.2021_00h00	5.18495e-05	0.0156067	6.72269	8
GO:0030324	lung development	GO_BiologicalProcess-EBI-UniProt-GOA-ACAP-ARAP_13.05.2021_00h00	5.4663e-05	0.0163989	5.20833	10
GO:0045446	endothelial cell differentiation	GO_BiologicalProcess-EBI-UniProt-GOA-ACAP-ARAP_13.05.2021_00h00	5.50346e-05	0.0164553	6.66667	8
GO:0002761	regulation of myeloid leukocyte differentiation	GO_BiologicalProcess-EBI-UniProt-GOA-ACAP-ARAP_13.05.2021_00h00	5.83809e-05	0.0173391	6.61157	8
GO:0046718	viral entry into host cell	GO_BiologicalProcess-EBI-UniProt-GOA-ACAP-ARAP_13.05.2021_00h00	5.88498e-05	0.0174195	5.76923	9
GO:0031960	response to corticosteroid	GO_BiologicalProcess-EBI-UniProt-GOA-ACAP-ARAP_13.05.2021_00h00	6.22668e-05	0.0183064	5.12821	10
GO:0048661	positive regulation of smooth muscle cell proliferation	GO_BiologicalProcess-EBI-UniProt-GOA-ACAP-ARAP_13.05.2021_00h00	6.53867e-05	0.0190275	7.69231	7
GO:0030323	respiratory tube development	GO_BiologicalProcess-EBI-UniProt-GOA-ACAP-ARAP_13.05.2021_00h00	6.49935e-05	0.0190431	5.10204	10
GO:0045622	regulation of T-helper cell differentiation	GO_BiologicalProcess-EBI-UniProt-GOA-ACAP-ARAP_13.05.2021_00h00	6.52242e-05	0.0190455	12.8205	5
GO:0043030	regulation of macrophage activation	GO_BiologicalProcess-EBI-UniProt-GOA-ACAP-ARAP_13.05.2021_00h00	6.65271e-05	0.0192929	9.52381	6
GO:0002704	negative regulation of leukocyte mediated immunity	GO_BiologicalProcess-EBI-UniProt-GOA-ACAP-ARAP_13.05.2021_00h00	7.27421e-05	0.020877	9.375	6
GO:0030204	chondroitin sulfate metabolic process	GO_BiologicalProcess-EBI-UniProt-GOA-ACAP-ARAP_13.05.2021_00h00	7.38793e-05	0.0211295	12.5	5
GO:0010634	positive regulation of epithelial cell migration	GO_BiologicalProcess-EBI-UniProt-GOA-ACAP-ARAP_13.05.2021_00h00	7.51217e-05	0.0214097	5.59006	9
GO:0052126	movement in host environment	GO_BiologicalProcess-EBI-UniProt-GOA-ACAP-ARAP_13.05.2021_00h00	7.69404e-05	0.0218511	5	10
GO:0002285	lymphocyte activation involved in immune response	GO_BiologicalProcess-EBI-UniProt-GOA-ACAP-ARAP_13.05.2021_00h00	7.69404e-05	0.0218511	5	10
GO:0034113	heterotypic cell-cell adhesion	GO_BiologicalProcess-EBI-UniProt-GOA-ACAP-ARAP_13.05.2021_00h00	7.94115e-05	0.022394	9.23077	6
GO:0030888	regulation of B cell proliferation	GO_BiologicalProcess-EBI-UniProt-GOA-ACAP-ARAP_13.05.2021_00h00	7.94115e-05	0.022394	9.23077	6
GO:0008360	regulation of cell shape	GO_BiologicalProcess-EBI-UniProt-GOA-ACAP-ARAP_13.05.2021_00h00	8.26134e-05	0.0232144	5.52147	9
GO:0002701	negative regulation of production of molecular mediator of immune response	GO_BiologicalProcess-EBI-UniProt-GOA-ACAP-ARAP_13.05.2021_00h00	8.33925e-05	0.0233499	12.1951	5
GO:0001776	leukocyte homeostasis	GO_BiologicalProcess-EBI-UniProt-GOA-ACAP-ARAP_13.05.2021_00h00	8.60185e-05	0.0239991	7.36842	7
GO:0030449	regulation of complement activation	GO_BiologicalProcess-EBI-UniProt-GOA-ACAP-ARAP_13.05.2021_00h00	8.68769e-05	0.0240649	6.25	8
GO:0002224	toll-like receptor signaling pathway	GO_BiologicalProcess-EBI-UniProt-GOA-ACAP-ARAP_13.05.2021_00h00	8.65885e-05	0.0240716	5.4878	9
GO:0004252	serine-type endopeptidase activity	GO_BiologicalProcess-EBI-UniProt-GOA-ACAP-ARAP_13.05.2021_00h00	9.33686e-05	0.0256764	4.13793	12
GO:0060840	artery development	GO_BiologicalProcess-EBI-UniProt-GOA-ACAP-ARAP_13.05.2021_00h00	9.81646e-05	0.0268971	7.2165	7
GO:0044272	sulfur compound biosynthetic process	GO_BiologicalProcess-EBI-UniProt-GOA-ACAP-ARAP_13.05.2021_00h00	0.0001065	0.0290745	4.80769	10
GO:0002523	leukocyte migration involved in inflammatory response	GO_BiologicalProcess-EBI-UniProt-GOA-ACAP-ARAP_13.05.2021_00h00	0.000106904	0.0290778	17.3913	4
GO:1904996	positive regulation of leukocyte adhesion to vascular endothelial cell	GO_BiologicalProcess-EBI-UniProt-GOA-ACAP-ARAP_13.05.2021_00h00	0.000106904	0.0290778	17.3913	4
GO:0090050	positive regulation of cell migration involved in sprouting angiogenesis	GO_BiologicalProcess-EBI-UniProt-GOA-ACAP-ARAP_13.05.2021_00h00	0.000106904	0.0290778	17.3913	4
GO:0050764	regulation of phagocytosis	GO_BiologicalProcess-EBI-UniProt-GOA-ACAP-ARAP_13.05.2021_00h00	0.00011897	0.0322409	7	7
GO:0007565	female pregnancy	GO_BiologicalProcess-EBI-UniProt-GOA-ACAP-ARAP_13.05.2021_00h00	0.000119823	0.0323522	4.73934	10
GO:0006026	aminoglycan catabolic process	GO_BiologicalProcess-EBI-UniProt-GOA-ACAP-ARAP_13.05.2021_00h00	0.000120436	0.0323972	8.57143	6
GO:0048872	homeostasis of number of cells	GO_BiologicalProcess-EBI-UniProt-GOA-ACAP-ARAP_13.05.2021_00h00	0.000124475	0.0333593	4.01338	12
GO:0050765	negative regulation of phagocytosis	GO_BiologicalProcess-EBI-UniProt-GOA-ACAP-ARAP_13.05.2021_00h00	0.000127183	0.0337035	16.6667	4
GO:0005125	cytokine activity	GO_BiologicalProcess-EBI-UniProt-GOA-ACAP-ARAP_13.05.2021_00h00	0.000127029	0.0337896	4.31373	11
GO:0030316	osteoclast differentiation	GO_BiologicalProcess-EBI-UniProt-GOA-ACAP-ARAP_13.05.2021_00h00	0.000126651	0.0338159	6.93069	7
GO:0048844	artery morphogenesis	GO_BiologicalProcess-EBI-UniProt-GOA-ACAP-ARAP_13.05.2021_00h00	0.000130359	0.0344148	8.4507	6
GO:0010518	positive regulation of phospholipase activity	GO_BiologicalProcess-EBI-UniProt-GOA-ACAP-ARAP_13.05.2021_00h00	0.000130359	0.0344148	8.4507	6
GO:0014002	astrocyte development	GO_BiologicalProcess-EBI-UniProt-GOA-ACAP-ARAP_13.05.2021_00h00	0.00013119	0.0345031	11.1111	5
GO:0050654	chondroitin sulfate proteoglycan metabolic process	GO_BiologicalProcess-EBI-UniProt-GOA-ACAP-ARAP_13.05.2021_00h00	0.00013119	0.0345031	11.1111	5
GO:0002822	regulation of adaptive immune response based on somatic recombination of immune receptors built from immunoglobulin superfamily domains	GO_BiologicalProcess-EBI-UniProt-GOA-ACAP-ARAP_13.05.2021_00h00	0.000142006	0.0372055	5.14286	9
GO:0043300	regulation of leukocyte degranulation	GO_BiologicalProcess-EBI-UniProt-GOA-ACAP-ARAP_13.05.2021_00h00	0.000145883	0.0380754	10.8696	5
GO:0060638	mesenchymal-epithelial cell signaling	GO_BiologicalProcess-EBI-UniProt-GOA-ACAP-ARAP_13.05.2021_00h00	0.000148671	0.0385059	30	3
GO:0051384	response to glucocorticoid	GO_BiologicalProcess-EBI-UniProt-GOA-ACAP-ARAP_13.05.2021_00h00	0.000148253	0.0385458	5.11364	9
GO:0045637	regulation of myeloid cell differentiation	GO_BiologicalProcess-EBI-UniProt-GOA-ACAP-ARAP_13.05.2021_00h00	0.00015059	0.0387017	4.23077	11
GO:0032753	positive regulation of interleukin-4 production	GO_BiologicalProcess-EBI-UniProt-GOA-ACAP-ARAP_13.05.2021_00h00	0.000150109	0.0387281	16	4
GO:0010594	regulation of endothelial cell migration	GO_BiologicalProcess-EBI-UniProt-GOA-ACAP-ARAP_13.05.2021_00h00	0.000154728	0.0394558	5.08475	9
GO:0035710	CD4-positive, alpha-beta T cell activation	GO_BiologicalProcess-EBI-UniProt-GOA-ACAP-ARAP_13.05.2021_00h00	0.000161509	0.0410234	6.66667	7
GO:0002548	monocyte chemotaxis	GO_BiologicalProcess-EBI-UniProt-GOA-ACAP-ARAP_13.05.2021_00h00	0.000164068	0.0415093	8.10811	6
GO:0051701	biological process involved in interaction with host	GO_BiologicalProcess-EBI-UniProt-GOA-ACAP-ARAP_13.05.2021_00h00	0.000166437	0.0419421	4.18251	11
GO:0045619	regulation of lymphocyte differentiation	GO_BiologicalProcess-EBI-UniProt-GOA-ACAP-ARAP_13.05.2021_00h00	0.000168389	0.0422656	5.02793	9
GO:0032967	positive regulation of collagen biosynthetic process	GO_BiologicalProcess-EBI-UniProt-GOA-ACAP-ARAP_13.05.2021_00h00	0.000175879	0.043794	15.3846	4
GO:0002292	T cell differentiation involved in immune response	GO_BiologicalProcess-EBI-UniProt-GOA-ACAP-ARAP_13.05.2021_00h00	0.000176718	0.043826	8	6
GO:0071548	response to dexamethasone	GO_BiologicalProcess-EBI-UniProt-GOA-ACAP-ARAP_13.05.2021_00h00	0.000179013	0.0440371	10.4167	5
GO:2001243	negative regulation of intrinsic apoptotic signaling pathway	GO_BiologicalProcess-EBI-UniProt-GOA-ACAP-ARAP_13.05.2021_00h00	0.000192443	0.0471484	6.48148	7
GO:0061756	leukocyte adhesion to vascular endothelial cell	GO_BiologicalProcess-EBI-UniProt-GOA-ACAP-ARAP_13.05.2021_00h00	0.000197587	0.0482111	10.2041	5
GO:0097709	connective tissue replacement	GO_BiologicalProcess-EBI-UniProt-GOA-ACAP-ARAP_13.05.2021_00h00	0.000202766	0.0490693	27.2727	3
GO:0045625	regulation of T-helper 1 cell differentiation	GO_BiologicalProcess-EBI-UniProt-GOA-ACAP-ARAP_13.05.2021_00h00	0.000202766	0.0490693	27.2727	3
GO:0002645	positive regulation of tolerance induction	GO_BiologicalProcess-EBI-UniProt-GOA-ACAP-ARAP_13.05.2021_00h00	0.000202766	0.0490693	27.2727	3
GO:0010714	positive regulation of collagen metabolic process	GO_BiologicalProcess-EBI-UniProt-GOA-ACAP-ARAP_13.05.2021_00h00	0.000204697	0.0491272	14.8148	4
GO:2000108	positive regulation of leukocyte apoptotic process	GO_BiologicalProcess-EBI-UniProt-GOA-ACAP-ARAP_13.05.2021_00h00	0.000204697	0.0491272	14.8148	4
GO:0010951	negative regulation of endopeptidase activity	GO_BiologicalProcess-EBI-UniProt-GOA-ACAP-ARAP_13.05.2021_00h00	0.000202412	0.0491862	4.08922	11
GO:0048660	regulation of smooth muscle cell proliferation	GO_BiologicalProcess-EBI-UniProt-GOA-ACAP-ARAP_13.05.2021_00h00	0.000206361	0.0493203	5.51724	8
GO:0033866	nucleoside bisphosphate biosynthetic process	GO_BiologicalProcess-EBI-UniProt-GOA-ACAP-ARAP_13.05.2021_00h00	0.049741	0.049741	4	3
GO:0034033	purine nucleoside bisphosphate biosynthetic process	GO_BiologicalProcess-EBI-UniProt-GOA-ACAP-ARAP_13.05.2021_00h00	0.049741	0.049741	4	3
GO:0034030	ribonucleoside bisphosphate biosynthetic process	GO_BiologicalProcess-EBI-UniProt-GOA-ACAP-ARAP_13.05.2021_00h00	0.049741	0.049741	4	3
GO:0031012	extracellular matrix	GO_CellularComponent-EBI-UniProt-GOA-ACAP-ARAP_13.05.2021_00h00	5.31707e-21	2.93502e-18	6.77686	41
GO:0030312	external encapsulating structure	GO_CellularComponent-EBI-UniProt-GOA-ACAP-ARAP_13.05.2021_00h00	5.65175e-21	3.10846e-18	6.76568	41
GO:0062023	collagen-containing extracellular matrix	GO_CellularComponent-EBI-UniProt-GOA-ACAP-ARAP_13.05.2021_00h00	7.5026e-18	4.07391e-15	7.23684	33
GO:0030141	secretory granule	GO_CellularComponent-EBI-UniProt-GOA-ACAP-ARAP_13.05.2021_00h00	1.46924e-13	7.46372e-11	4.2508	40
GO:0009897	external side of plasma membrane	GO_CellularComponent-EBI-UniProt-GOA-ACAP-ARAP_13.05.2021_00h00	3.38643e-12	1.65935e-09	5.89569	26
GO:0030667	secretory granule membrane	GO_CellularComponent-EBI-UniProt-GOA-ACAP-ARAP_13.05.2021_00h00	3.56443e-12	1.74301e-09	6.80473	23
GO:0098552	side of membrane	GO_CellularComponent-EBI-UniProt-GOA-ACAP-ARAP_13.05.2021_00h00	1.28439e-11	6.255e-09	4.63378	31
GO:0101002	ficolin-1-rich granule	GO_CellularComponent-EBI-UniProt-GOA-ACAP-ARAP_13.05.2021_00h00	9.37411e-09	4.1621e-06	7.28155	15
GO:0070820	tertiary granule	GO_CellularComponent-EBI-UniProt-GOA-ACAP-ARAP_13.05.2021_00h00	1.10979e-08	4.91637e-06	7.86517	14
GO:0005604	basement membrane	GO_CellularComponent-EBI-UniProt-GOA-ACAP-ARAP_13.05.2021_00h00	1.47859e-08	6.5058e-06	10.8911	11
GO:0101003	ficolin-1-rich granule membrane	GO_CellularComponent-EBI-UniProt-GOA-ACAP-ARAP_13.05.2021_00h00	4.29026e-08	1.86197e-05	13.6364	9
GO:0031091	platelet alpha granule	GO_CellularComponent-EBI-UniProt-GOA-ACAP-ARAP_13.05.2021_00h00	1.23387e-06	0.000483677	9.27835	9
GO:0070821	tertiary granule membrane	GO_CellularComponent-EBI-UniProt-GOA-ACAP-ARAP_13.05.2021_00h00	1.86731e-06	0.00072265	10.5263	8
GO:0034774	secretory granule lumen	GO_CellularComponent-EBI-UniProt-GOA-ACAP-ARAP_13.05.2021_00h00	1.18755e-05	0.00415642	4.15512	15
GO:0060205	cytoplasmic vesicle lumen	GO_CellularComponent-EBI-UniProt-GOA-ACAP-ARAP_13.05.2021_00h00	1.35232e-05	0.00470608	4.10959	15
GO:0031093	platelet alpha granule lumen	GO_CellularComponent-EBI-UniProt-GOA-ACAP-ARAP_13.05.2021_00h00	1.41956e-05	0.00492588	9.72222	7
GO:0031983	vesicle lumen	GO_CellularComponent-EBI-UniProt-GOA-ACAP-ARAP_13.05.2021_00h00	1.44208e-05	0.00498958	4.08719	15
GO:0005788	endoplasmic reticulum lumen	GO_CellularComponent-EBI-UniProt-GOA-ACAP-ARAP_13.05.2021_00h00	2.0478e-05	0.00686014	4.2042	14
GO:0016323	basolateral plasma membrane	GO_CellularComponent-EBI-UniProt-GOA-ACAP-ARAP_13.05.2021_00h00	6.88515e-05	0.0198981	4.62185	11
GO:0005902	microvillus	GO_CellularComponent-EBI-UniProt-GOA-ACAP-ARAP_13.05.2021_00h00	7.01185e-05	0.0201941	7.6087	7
GO:0009925	basal plasma membrane	GO_CellularComponent-EBI-UniProt-GOA-ACAP-ARAP_13.05.2021_00h00	0.00017777	0.0439092	4.15094	11
GO:0140375	immune receptor activity	GO_MolecularFunction-EBI-UniProt-GOA-ACAP-ARAP_13.05.2021_00h00	5.141e-11	2.4574e-08	10.5634	15
GO:0005518	collagen binding	GO_MolecularFunction-EBI-UniProt-GOA-ACAP-ARAP_13.05.2021_00h00	1.39869e-10	6.61582e-08	16.6667	11
GO:0050786	RAGE receptor binding	GO_MolecularFunction-EBI-UniProt-GOA-ACAP-ARAP_13.05.2021_00h00	2.83671e-06	0.00107795	40	4
GO:0005126	cytokine receptor binding	GO_MolecularFunction-EBI-UniProt-GOA-ACAP-ARAP_13.05.2021_00h00	3.65601e-06	0.001371	4.8951	14
GO:0005539	glycosaminoglycan binding	GO_MolecularFunction-EBI-UniProt-GOA-ACAP-ARAP_13.05.2021_00h00	3.72727e-06	0.001394	5.26316	13
GO:0019838	growth factor binding	GO_MolecularFunction-EBI-UniProt-GOA-ACAP-ARAP_13.05.2021_00h00	4.21148e-06	0.00156667	6.99301	10
GO:0019864	IgG binding	GO_MolecularFunction-EBI-UniProt-GOA-ACAP-ARAP_13.05.2021_00h00	6.57174e-06	0.00238554	33.3333	4
GO:0005161	platelet-derived growth factor receptor binding	GO_MolecularFunction-EBI-UniProt-GOA-ACAP-ARAP_13.05.2021_00h00	1.76578e-05	0.00600366	26.6667	4
GO:0004629	phospholipase C activity	GO_MolecularFunction-EBI-UniProt-GOA-ACAP-ARAP_13.05.2021_00h00	2.40785e-05	0.00792181	8.97436	7
GO:0045236	CXCR chemokine receptor binding	GO_MolecularFunction-EBI-UniProt-GOA-ACAP-ARAP_13.05.2021_00h00	3.85715e-05	0.0122272	22.2222	4
GO:0019955	cytokine binding	GO_MolecularFunction-EBI-UniProt-GOA-ACAP-ARAP_13.05.2021_00h00	4.11292e-05	0.0129557	6.04027	9
GO:0005178	integrin binding	GO_MolecularFunction-EBI-UniProt-GOA-ACAP-ARAP_13.05.2021_00h00	5.59813e-05	0.0166824	5.80645	9
GO:0019865	immunoglobulin binding	GO_MolecularFunction-EBI-UniProt-GOA-ACAP-ARAP_13.05.2021_00h00	0.000150109	0.0387281	16	4
KEGG:04380	Osteoclast differentiation	KEGG_13.05.2021	3.582e-15	1.88413e-12	14.0625	18
KEGG:05323	Rheumatoid arthritis	KEGG_13.05.2021	2.88086e-11	1.38569e-08	13.9785	13
KEGG:05150	Staphylococcus aureus infection	KEGG_13.05.2021	6.42029e-10	2.97902e-07	12.5	12
KEGG:04662	B cell receptor signaling pathway	KEGG_13.05.2021	1.5635e-09	7.14521e-07	13.4146	11
KEGG:04610	Complement and coagulation cascades	KEGG_13.05.2021	2.31456e-09	1.04849e-06	12.9412	11
KEGG:05144	Malaria	KEGG_13.05.2021	3.38159e-09	1.5251e-06	18	9
KEGG:04670	Leukocyte transendothelial migration	KEGG_13.05.2021	4.77269e-09	2.14771e-06	10.5263	12
KEGG:05417	Lipid and atherosclerosis	KEGG_13.05.2021	1.66888e-08	7.3264e-06	6.97674	15
KEGG:05205	Proteoglycans in cancer	KEGG_13.05.2021	6.62734e-08	2.8365e-05	6.82927	14
KEGG:04657	IL-17 signaling pathway	KEGG_13.05.2021	8.5129e-08	3.60947e-05	10.6383	10
KEGG:04514	Cell adhesion molecules	KEGG_13.05.2021	9.7855e-08	4.12948e-05	8.05369	12
KEGG:05146	Amoebiasis	KEGG_13.05.2021	1.85795e-07	7.67335e-05	9.80392	10
KEGG:04613	Neutrophil extracellular trap formation	KEGG_13.05.2021	1.93164e-07	7.95835e-05	6.84211	13
KEGG:05418	Fluid shear stress and atherosclerosis	KEGG_13.05.2021	4.03526e-07	0.000164639	7.91367	11
KEGG:04668	TNF signaling pathway	KEGG_13.05.2021	4.48654e-07	0.000182154	8.92857	10
KEGG:04062	Chemokine signaling pathway	KEGG_13.05.2021	1.50471e-06	0.000588343	6.25	12
KEGG:04933	AGE-RAGE signaling pathway in diabetic complications	KEGG_13.05.2021	1.59621e-06	0.000620927	9	9
KEGG:04060	Cytokine-cytokine receptor interaction	KEGG_13.05.2021	5.22426e-06	0.00192253	4.74576	14
KEGG:05167	Kaposi sarcoma-associated herpesvirus infection	KEGG_13.05.2021	9.98573e-06	0.00354493	5.69948	11
KEGG:05171	Coronavirus disease	KEGG_13.05.2021	1.05554e-05	0.00373661	5.17241	12
KEGG:04061	Viral protein interaction with cytokine and cytokine receptor	KEGG_13.05.2021	1.47048e-05	0.00507316	8	8
KEGG:05133	Pertussis	KEGG_13.05.2021	2.02986e-05	0.00682034	9.21053	7
KEGG:05416	Viral myocarditis	KEGG_13.05.2021	5.03802e-05	0.0153156	10	6
KEGG:00532	Glycosaminoglycan biosynthesis	KEGG_13.05.2021	6.00258e-05	0.0177076	20	4
KEGG:04630	JAK-STAT signaling pathway	KEGG_13.05.2021	7.87927e-05	0.0222983	5.55556	9
KEGG:04926	Relaxin signaling pathway	KEGG_13.05.2021	9.17572e-05	0.025325	6.20155	8
KEGG:04666	Fc gamma R-mediated phagocytosis	KEGG_13.05.2021	9.81646e-05	0.0268971	7.2165	7
KEGG:04064	NF-kappa B signaling pathway	KEGG_13.05.2021	0.000152144	0.0389488	6.73077	7
KEGG:04620	Toll-like receptor signaling pathway	KEGG_13.05.2021	0.000152144	0.0389488	6.73077	7
KEGG:05152	Tuberculosis	KEGG_13.05.2021	0.000175587	0.0438968	5	9
KEGG:05140	Leishmaniasis	KEGG_13.05.2021	0.000204323	0.0492417	7.79221	6
F3	1.23015	8.39083	6.80954	5.55687e-10	2.87219e-08	12.4432
OPN3	-0.885981	8.355	-6.80942	5.56028e-10	2.87219e-08	12.4427
NUP188	0.591221	8.49754	6.80925	5.56479e-10	2.87219e-08	12.4419
C14orf142	-0.649038	8.13331	-6.80049	5.80772e-10	2.99078e-08	12.4005
RNU4-38P	-0.888562	4.80549	-6.79992	5.8237e-10	2.99222e-08	12.3978
TRIM36	-0.952952	6.46115	-6.79447	5.98044e-10	3.05891e-08	12.372
CXCL1	2.81584	10.0966	6.78387	6.29737e-10	3.1994e-08	12.322
ST3GAL2	0.981804	8.05339	6.78206	6.35299e-10	3.22045e-08	12.3135
SLC20A2	-1.08302	8.80003	-6.77967	6.42753e-10	3.25098e-08	12.3022
C8orf4	1.42784	7.42527	6.77873	6.45682e-10	3.25854e-08	12.2978
SENP8	-0.638569	6.65417	-6.7693	6.76028e-10	3.39659e-08	12.2533
G6PC	-0.964691	5.00405	-6.76441	6.92311e-10	3.45808e-08	12.2302
NR6A1	-0.651476	6.60538	-6.76425	6.92835e-10	3.45808e-08	12.2295
SEC22C	0.836709	7.56325	6.75917	7.10159e-10	3.53678e-08	12.2055
NCALD	0.70924	6.50245	6.75578	7.21951e-10	3.58764e-08	12.1896
LRIG2	-0.58894	7.32592	-6.74225	7.71055e-10	3.79799e-08	12.1258
SLC36A1	-1.31587	8.15847	-6.73278	8.07311e-10	3.95984e-08	12.0813
HSD3BP4	-0.821654	6.01332	-6.7278	8.27086e-10	4.04809e-08	12.0578
TMEM37	-1.54579	8.82579	-6.72376	8.43477e-10	4.11059e-08	12.0388
NCKAP5	-0.769197	5.64635	-6.72152	8.52698e-10	4.14663e-08	12.0283
CTSA	-0.621372	10.6769	-6.71013	9.01128e-10	4.36346e-08	11.9747
ZYX	0.828646	9.27365	6.70842	9.08653e-10	4.39053e-08	11.9667
TRIB2	1.5904	7.59925	6.70593	9.19647e-10	4.43422e-08	11.955
C15orf38-AP3S2	-0.716986	9.84772	-6.68825	1.00194e-09	4.80788e-08	11.872
UBE2L6	0.768148	8.19983	6.68768	1.00469e-09	4.80788e-08	11.8693
ZNF429	-1.08019	6.29357	-6.68745	1.00585e-09	4.80788e-08	11.8682
PDZD3	-1.39239	7.04009	-6.68736	1.00625e-09	4.80788e-08	11.8678
PPARG	-1.32171	9.03859	-6.68706	1.00773e-09	4.80788e-08	11.8664
RN7SL541P	-0.726668	5.34242	-6.68644	1.01078e-09	4.81232e-08	11.8635
METTL7A	-1.12898	8.10103	-6.67792	1.05334e-09	4.99403e-08	11.8235
C6orf203	-0.600593	6.65408	-6.67745	1.05572e-09	4.99488e-08	11.8214
FAIM2	0.872994	7.19943	6.67457	1.07056e-09	5.05454e-08	11.8078
SEC13	0.596602	9.31947	6.67413	1.07281e-09	5.05468e-08	11.8058
IL1RN	2.34517	7.9785	6.672	1.08392e-09	5.09647e-08	11.7958
HSDL2	-0.885402	7.86135	-6.6714	1.08711e-09	5.09818e-08	11.793
CYP2R1	-0.626633	7.52206	-6.66633	1.11411e-09	5.20606e-08	11.7692
LIPG	1.13939	8.53513	6.65679	1.16672e-09	5.4194e-08	11.7245
UBE2S	0.635003	7.70767	6.65638	1.16902e-09	5.4194e-08	11.7226
ANXA5	1.28047	10.2346	6.65486	1.17766e-09	5.44697e-08	11.7155
HIST1H3E	-0.815921	6.23519	-6.65352	1.18527e-09	5.47104e-08	11.7092
PLS3	1.03771	7.95869	6.65073	1.20137e-09	5.52288e-08	11.6962
TRIB1	0.841629	9.97525	6.64759	1.21977e-09	5.58488e-08	11.6814
PML	0.773777	7.96471	6.64564	1.23129e-09	5.60524e-08	11.6723
CD81	0.848804	10.9795	6.64298	1.24722e-09	5.65355e-08	11.6599
COTL1	0.649043	9.2586	6.64257	1.24972e-09	5.65362e-08	11.6579
GCOM1	-0.932938	7.24067	-6.63659	1.2863e-09	5.796e-08	11.63
SLC3A1	-1.30695	6.50706	-6.63429	1.30067e-09	5.84915e-08	11.6192
HOXA4	-0.613165	6.00585	-6.62427	1.36515e-09	6.09087e-08	11.5724
HM13	0.681332	9.30615	6.62332	1.37142e-09	6.10684e-08	11.5679
EXOC6B	-0.614022	8.57656	-6.61846	1.404e-09	6.22751e-08	11.5452
SVOPL	-0.594546	5.41237	-6.60369	1.50764e-09	6.64826e-08	11.4762
SLC17A8	-0.604112	5.36331	-6.59492	1.57266e-09	6.86829e-08	11.4353
CLN5	-0.657875	7.94548	-6.59339	1.58432e-09	6.89272e-08	11.4282
ADIRF	-0.746694	7.35404	-6.59241	1.59181e-09	6.90853e-08	11.4236
BTN3A1	0.797955	8.27737	6.57809	1.70545e-09	7.34929e-08	11.3568
NUDT7	-1.00228	7.69631	-6.57381	1.7409e-09	7.48784e-08	11.3369
ACADS	-1.11258	8.85121	-6.56714	1.79768e-09	7.7029e-08	11.3058
CNIH4	-0.591575	9.17104	-6.56009	1.85967e-09	7.92367e-08	11.273
PRKAB2	-0.654978	8.02332	-6.55698	1.88766e-09	8.02786e-08	11.2585
TMEM133	-0.764483	7.63932	-6.55427	1.91246e-09	8.10297e-08	11.2459
SSR1	0.756154	10.526	6.54594	1.99054e-09	8.38306e-08	11.2072
KIAA1107	-0.81493	6.01881	-6.54572	1.99269e-09	8.38306e-08	11.2061
CNGA1	-1.06556	4.93809	-6.54565	1.99333e-09	8.38306e-08	11.2058
SLC41A1	0.9413	7.54874	6.53852	2.06275e-09	8.65899e-08	11.1727
MT1DP	-0.851867	8.79482	-6.53776	2.07032e-09	8.67473e-08	11.1691
P2RX4	-0.982749	8.57468	-6.53634	2.08445e-09	8.71783e-08	11.1625
TMCC3	-0.853075	9.446	-6.53012	2.14766e-09	8.94926e-08	11.1336
MT1JP	-1.02897	7.18032	-6.51967	2.25808e-09	9.3238e-08	11.0851
MXRA5	2.09406	9.02458	6.51667	2.29076e-09	9.4416e-08	11.0712
ADAMTS9	1.70507	7.91166	6.51596	2.2986e-09	9.45674e-08	11.0678
CALU	1.178	8.82036	6.51543	2.3044e-09	9.46345e-08	11.0654
IGSF9	-1.05255	7.83248	-6.51006	2.36455e-09	9.64839e-08	11.0405
SLC9A3R1	-0.914524	10.1274	-6.50989	2.36643e-09	9.64839e-08	11.0397
SLC28A3	1.3461	7.37581	6.50668	2.40309e-09	9.77739e-08	11.0248
MCOLN2	-1.6762	7.60695	-6.50637	2.40667e-09	9.77739e-08	11.0234
GAREM	-0.677831	8.36718	-6.50527	2.41948e-09	9.79436e-08	11.0182
SEMA5A	-1.23541	8.66854	-6.50478	2.42514e-09	9.79983e-08	11.016
RAC2	1.37481	9.66382	6.50189	2.45894e-09	9.91876e-08	11.0026
DAPK2	-0.71371	8.23149	-6.48162	2.70949e-09	1.08141e-07	10.9087
GLB1L2	-1.07805	8.17497	-6.48069	2.72157e-09	1.08322e-07	10.9043
ANKH	-0.840865	8.5567	-6.48038	2.72564e-09	1.08322e-07	10.9029
UGDH	-0.927007	10.8734	-6.47765	2.76146e-09	1.09446e-07	10.8903
C11orf53	-0.756246	5.7584	-6.4711	2.8493e-09	1.1234e-07	10.86
MRPL34	-0.610148	7.92131	-6.46945	2.87188e-09	1.12838e-07	10.8523
ANKDD1B	-0.766172	5.51228	-6.46448	2.94092e-09	1.15351e-07	10.8293
AGRN	0.639141	8.35546	6.46367	2.95233e-09	1.15599e-07	10.8256
GDE1	-0.627029	8.65898	-6.45412	3.09016e-09	1.19961e-07	10.7814
KCND3	1.63516	7.40427	6.45352	3.09911e-09	1.20104e-07	10.7786
ASRGL1	0.962296	8.1565	6.4491	3.16516e-09	1.22048e-07	10.7582
TPRG1L	-0.710696	9.15928	-6.44906	3.16577e-09	1.22048e-07	10.758
CCDC112	-0.746313	5.89253	-6.44873	3.17077e-09	1.22048e-07	10.7565
CFB	1.87428	9.81776	6.44212	3.27242e-09	1.25323e-07	10.726
LOC642947	-0.806619	5.67954	-6.43933	3.31633e-09	1.26791e-07	10.7131
SSTR1	-0.72329	7.44283	-6.43841	3.33089e-09	1.27134e-07	10.7088
VTRNA1-3	0.90397	6.43381	6.43677	3.35705e-09	1.27917e-07	10.7012
PPARGC1A	-1.92031	7.72935	-6.43014	3.4649e-09	1.31805e-07	10.6707
HMGA2	-0.68279	6.47958	-6.429	3.48389e-09	1.32306e-07	10.6654
ARNTL2	1.48588	7.51188	6.42701	3.5171e-09	1.32901e-07	10.6562
SULT1A2	-1.65975	7.92119	-6.42149	3.61087e-09	1.35766e-07	10.6307
ZC3H12A	1.22878	9.05541	6.42024	3.63244e-09	1.36352e-07	10.625
AFG3L2	-0.734243	8.48802	-6.41906	3.6528e-09	1.3673e-07	10.6195
MSTO1	0.619837	7.8523	6.4118	3.78149e-09	1.41014e-07	10.586
SYVN1	0.590537	9.39211	6.41002	3.81362e-09	1.418e-07	10.5779
ANO10	-0.770956	9.1264	-6.40994	3.81504e-09	1.418e-07	10.5775
CARD6	1.3629	6.04238	6.40737	3.86206e-09	1.43079e-07	10.5656
UGP2	-1.01762	9.71261	-6.4068	3.87258e-09	1.43235e-07	10.563
LRP8	1.12617	8.18153	6.40567	3.8934e-09	1.43771e-07	10.5578
ZFPM2	0.848475	6.8788	6.40056	3.98945e-09	1.46603e-07	10.5342
SNORD3B-1	1.32627	10.3668	6.39886	4.02183e-09	1.47554e-07	10.5264
ACAA2	-0.937743	8.85891	-6.3982	4.03444e-09	1.47778e-07	10.5234
NCOA7	1.01999	7.65272	6.39406	4.11475e-09	1.50062e-07	10.5043
LIAS	-0.704318	6.4084	-6.39236	4.14818e-09	1.5097e-07	10.4965
SLC9A7	0.943193	7.13221	6.39132	4.16879e-09	1.51477e-07	10.4917
MYC	0.656778	8.36929	6.38452	4.30576e-09	1.56204e-07	10.4604
UGT1A1	-1.36336	7.22401	-6.38315	4.33397e-09	1.56977e-07	10.4541
BPHL	-0.72783	7.08733	-6.38134	4.37134e-09	1.58078e-07	10.4458
STX3	-0.740648	8.66366	-6.37626	4.47819e-09	1.61428e-07	10.4224
SLC26A2	-3.64442	9.07192	-6.37138	4.58334e-09	1.64696e-07	10.4
ZHX2	0.696195	8.09876	6.37064	4.59947e-09	1.65014e-07	10.3966
CXorf23	-0.748471	6.5245	-6.36913	4.63256e-09	1.65939e-07	10.3897
MYO1D	-1.03258	10.226	-6.36675	4.68523e-09	1.67562e-07	10.3787
MTCL1	0.627102	6.80973	6.36193	4.79372e-09	1.71172e-07	10.3566
CEBPD	0.693959	9.43067	6.35936	4.85249e-09	1.72998e-07	10.3448
FUT8	1.2105	8.87621	6.35846	4.87331e-09	1.73469e-07	10.3407
FGFR3	-1.00354	7.75516	-6.35791	4.8861e-09	1.73652e-07	10.3381
PLK2	1.05359	7.28179	6.34856	5.10771e-09	1.81244e-07	10.2952
LMTK2	-0.662474	9.04745	-6.34699	5.14595e-09	1.82316e-07	10.288
FASTKD1	-0.796552	7.3174	-6.34587	5.17319e-09	1.82711e-07	10.2829
TMEM220	-0.948162	6.76553	-6.34528	5.18775e-09	1.82936e-07	10.2802
MT1M	-2.39381	8.65314	-6.34496	5.19568e-09	1.82936e-07	10.2787
MIR215	-1.88001	4.8645	-6.34022	5.31389e-09	1.86261e-07	10.2569
TINAG	-1.54283	6.69294	-6.34018	5.31472e-09	1.86261e-07	10.2568
PECR	-0.882182	6.98029	-6.3319	5.52763e-09	1.93424e-07	10.2188
ACOT8	-0.736496	8.22139	-6.33071	5.55881e-09	1.94216e-07	10.2134
CYP4X1	1.24117	6.7073	6.32968	5.58598e-09	1.94866e-07	10.2086
ZCCHC14	-0.744319	7.63113	-6.327	5.65744e-09	1.96754e-07	10.1963
SCO1	-0.611018	8.24357	-6.3227	5.77384e-09	2.00495e-07	10.1766
PHF7	-0.698897	6.57968	-6.32171	5.80101e-09	2.00991e-07	10.1721
CLYBL	-1.15094	7.41502	-6.32153	5.80582e-09	2.00991e-07	10.1713
RMRP	0.666946	11.7848	6.31869	5.88442e-09	2.03402e-07	10.1583
SLC41A2	-0.786201	9.43837	-6.30975	6.13873e-09	2.11228e-07	10.1174
AKAP9	-0.735749	8.15204	-6.3093	6.15199e-09	2.11364e-07	10.1153
PTPN13	1.21485	6.6876	6.30858	6.17294e-09	2.11763e-07	10.112
OSMR	2.39707	8.37105	6.30508	6.27608e-09	2.14331e-07	10.096
IFITM1	1.16068	10.3348	6.30354	6.32194e-09	2.15572e-07	10.0889
TMEM170A	-0.886129	9.94048	-6.30134	6.38795e-09	2.17483e-07	10.0789
TAP1	0.987341	10.6129	6.30104	6.39712e-09	2.17483e-07	10.0775
HEG1	1.54217	7.99116	6.30028	6.42021e-09	2.17941e-07	10.074
CLSTN3	0.788945	7.44838	6.2961	6.54828e-09	2.21297e-07	10.0549
LPIN1	0.94334	8.60157	6.28989	6.74318e-09	2.26024e-07	10.0266
CD34	1.38181	8.1868	6.28874	6.78014e-09	2.26437e-07	10.0213
CXCL3	1.08769	7.44182	6.28802	6.80326e-09	2.26875e-07	10.018
RNVU1-15	1.05267	7.33051	6.28521	6.89397e-09	2.29227e-07	10.0052
IRAK3	1.96397	7.6422	6.28093	7.03484e-09	2.33569e-07	9.98563
PDZK1	-0.958894	4.939	-6.2797	7.07582e-09	2.34587e-07	9.98001
HSD17B11	-0.939816	10.5736	-6.27573	7.20972e-09	2.38677e-07	9.96188
ETFA	-0.615262	9.62824	-6.26288	7.66066e-09	2.53083e-07	9.90323
MAPKAPK2	0.599245	9.3642	6.2627	7.66715e-09	2.53083e-07	9.90241
RNU6-377P	-0.797159	6.45314	-6.25845	7.82222e-09	2.57453e-07	9.88305
IFITM2	1.32049	8.82661	6.24911	8.17447e-09	2.67873e-07	9.84047
PECAM1	1.98107	9.84641	6.24881	8.18599e-09	2.67873e-07	9.83911
LOC100131796	-0.588006	4.97276	-6.2439	8.37754e-09	2.73354e-07	9.81675
SERPINB5	2.89149	8.54743	6.23697	8.65531e-09	2.82012e-07	9.78521
HYKK	-0.628364	6.82736	-6.23479	8.74463e-09	2.84107e-07	9.77529
PRAP1	-0.751267	7.82371	-6.23303	8.81744e-09	2.85655e-07	9.76727
ZNF137P	-0.605544	5.19106	-6.23045	8.92519e-09	2.88734e-07	9.75553
FXYD5	1.05652	8.54867	6.22902	8.98542e-09	2.90269e-07	9.74903
MT1A	-1.04572	8.99765	-6.22223	9.27708e-09	2.98841e-07	9.71816
PSME2	0.764268	9.65117	6.22125	9.32009e-09	2.99801e-07	9.71368
TRIM29	1.50855	8.17517	6.22075	9.34194e-09	3.00079e-07	9.71142
MIF	0.6745	9.76374	6.20613	1.00068e-08	3.19627e-07	9.64497
ALCAM	0.67095	8.71555	6.20187	1.02089e-08	3.25625e-07	9.62564
ACVR1C	-1.30834	7.85756	-6.20009	1.02949e-08	3.27907e-07	9.61754
GRB10	0.772063	7.54242	6.19356	1.06153e-08	3.37167e-07	9.58792
TMEM39A	0.583566	8.69566	6.18325	1.11418e-08	3.5143e-07	9.54114
IFI35	0.724579	8.4764	6.18089	1.12654e-08	3.53856e-07	9.53047
ZNF480	-0.681657	8.53227	-6.17889	1.1372e-08	3.56709e-07	9.52138
PSMB9	1.05676	8.82271	6.17827	1.14048e-08	3.57247e-07	9.51859
FSIP2	-1.55634	5.93964	-6.17484	1.15896e-08	3.61324e-07	9.50306
ZDHHC23	-0.895008	8.33564	-6.17468	1.15986e-08	3.61324e-07	9.50231
IGKV1OR9-1	1.41279	9.25617	6.16525	1.21225e-08	3.76187e-07	9.45962
MT1P3	-1.08364	8.12489	-6.1652	1.21255e-08	3.76187e-07	9.45939
PIM3	0.588201	7.88127	6.15937	1.2461e-08	3.84497e-07	9.43301
NHEJ1	-0.879099	7.48101	-6.15561	1.26826e-08	3.90803e-07	9.41598
CD160	-0.730393	4.97664	-6.15126	1.29434e-08	3.98299e-07	9.39631
APOL1	1.94209	8.71637	6.14964	1.3042e-08	4.00791e-07	9.38898
RGS2	1.72372	8.21989	6.14623	1.32518e-08	4.05592e-07	9.37356
CDKL1	-0.729626	6.15451	-6.14468	1.33479e-08	4.07983e-07	9.36658
FOS	1.97523	9.65731	6.14088	1.35874e-08	4.13632e-07	9.3494
SPPL2A	-0.663384	10.7588	-6.13936	1.36845e-08	4.16031e-07	9.34252
MCFD2	0.745904	8.44914	6.1368	1.38494e-08	4.1992e-07	9.33094
CNNM2	-1.10228	7.92198	-6.13506	1.39625e-08	4.22221e-07	9.32309
MT1G	-1.64357	11.2648	-6.1332	1.40844e-08	4.24236e-07	9.31469
MMP14	0.996452	8.77515	6.12689	1.4506e-08	4.36332e-07	9.2862
ABAT	-0.868859	7.43305	-6.12296	1.47746e-08	4.43239e-07	9.26847
KLHL8	-0.739882	7.05256	-6.12165	1.48651e-08	4.45364e-07	9.26257
MT1F	-1.70052	10.8331	-6.11998	1.49818e-08	4.48271e-07	9.25502
SEC14L1	0.993572	8.45797	6.11915	1.50398e-08	4.49414e-07	9.25128
SDC3	0.657249	7.60842	6.11804	1.51177e-08	4.51146e-07	9.2463
FYN	1.23309	7.67963	6.1169	1.51986e-08	4.52967e-07	9.24114
GXYLT2	-1.41507	6.64022	-6.10919	1.5756e-08	4.68443e-07	9.20635
PRDX6	-1.0629	9.56896	-6.10599	1.59923e-08	4.74212e-07	9.19197
PANK3	-0.653016	9.42261	-6.10596	1.5995e-08	4.74212e-07	9.19181
ITGA5	1.93179	8.88252	6.10538	1.60384e-08	4.74726e-07	9.18919
PLD1	-0.651422	8.48049	-6.10517	1.60542e-08	4.74726e-07	9.18824
PTPRR	-1.46472	7.16463	-6.10057	1.64018e-08	4.83746e-07	9.16755
PHOSPHO2	-0.636005	6.26256	-6.10003	1.64438e-08	4.84356e-07	9.16508
CCDC183	-0.699365	6.47193	-6.09798	1.66013e-08	4.88361e-07	9.15587
FZD3	0.750449	6.67885	6.09739	1.6647e-08	4.88443e-07	9.15321
PGRMC1	-0.580464	10.4527	-6.09739	1.66471e-08	4.88443e-07	9.15321
IGKV1OR9-2	1.52976	9.85233	6.09491	1.68407e-08	4.92851e-07	9.14204
LETM1	-0.687136	8.96265	-6.09345	1.69554e-08	4.95568e-07	9.13549
ATP8A1	-0.811587	8.32603	-6.09112	1.71409e-08	4.99706e-07	9.12497
CCDC89	-0.619332	5.61249	-6.08863	1.73409e-08	5.0424e-07	9.11377
SLC16A9	-2.02522	7.17229	-6.08763	1.74219e-08	5.05949e-07	9.10927
ETS2	0.602342	10.9218	6.08341	1.77676e-08	5.14247e-07	9.09029
C2orf88	-1.01655	7.7947	-6.08284	1.78147e-08	5.14723e-07	9.08774
MIR194-1	-1.55984	4.95814	-6.079	1.81367e-08	5.2336e-07	9.07044
KCNG3	-0.604059	6.63595	-6.07016	1.88979e-08	5.42688e-07	9.03074
ZNF383	-0.618781	7.05924	-6.07012	1.89021e-08	5.42688e-07	9.03052
ELL2P1	1.27871	7.80964	6.06943	1.89624e-08	5.43733e-07	9.02744
SPCS3	0.916668	9.54832	6.06747	1.91359e-08	5.48014e-07	9.01865
SESTD1	0.77887	7.49405	6.06255	1.95795e-08	5.59308e-07	8.99652
CCL20	1.95156	8.47815	6.06128	1.96949e-08	5.61194e-07	8.99084
RNF152	-1.45036	8.02334	-6.06011	1.98028e-08	5.63561e-07	8.98557
ENTPD5	-1.80565	8.88892	-6.05936	1.98716e-08	5.64811e-07	8.98222
ZNF768	-0.636316	7.52835	-6.05868	1.99346e-08	5.65894e-07	8.97916
ACOT13	-0.872867	9.79026	-6.05513	2.02665e-08	5.74204e-07	8.96322
SLC44A1	-0.810644	10.4176	-6.05501	2.02779e-08	5.74204e-07	8.96267
PDIA4	0.818736	10.7014	6.05271	2.04954e-08	5.7964e-07	8.95237
TMEM209	-0.691896	8.82713	-6.04887	2.08647e-08	5.88617e-07	8.93513
BTN3A3	0.800475	7.81377	6.04818	2.09321e-08	5.89785e-07	8.93202
CELSR1	0.600038	7.34318	6.04728	2.10191e-08	5.91503e-07	8.92801
TMCO1	-0.741155	9.98268	-6.04219	2.15221e-08	6.04162e-07	8.90517
DUSP4	1.10421	6.71893	6.04062	2.16792e-08	6.07593e-07	8.89815
ACTN1	0.626972	10.7607	6.04044	2.16978e-08	6.07593e-07	8.89732
RAB4A	-0.737721	7.62291	-6.04015	2.17271e-08	6.07662e-07	8.89602
CHKA	-0.785881	8.29977	-6.0381	2.19344e-08	6.11953e-07	8.88685
DRAM1	1.5291	7.9323	6.0376	2.19857e-08	6.12632e-07	8.8846
ELK3	1.12662	8.09201	6.03697	2.20503e-08	6.13465e-07	8.88177
STRADB	-1.03117	9.47894	-6.03109	2.26604e-08	6.2835e-07	8.85541
PARK2	-0.757011	6.27607	-6.02836	2.29485e-08	6.34015e-07	8.84322
TRPM6	-2.47066	7.62444	-6.02705	2.30888e-08	6.37116e-07	8.83733
CD276	0.603106	8.64925	6.02454	2.33592e-08	6.43795e-07	8.82609
CTNNAL1	0.668268	7.13828	6.02361	2.34603e-08	6.45797e-07	8.82192
NDUFS1	-0.609391	9.18431	-6.02306	2.35194e-08	6.46642e-07	8.81949
TMEM38B	-1.03399	6.94386	-6.02228	2.36051e-08	6.47429e-07	8.81598
MT1HL1	-0.635455	7.99324	-6.01973	2.38857e-08	6.54335e-07	8.80457
HIGD1AP1	-0.876954	9.66943	-6.0141	2.4517e-08	6.70014e-07	8.77939
TGFA	-0.69609	7.09329	-6.01255	2.46945e-08	6.73243e-07	8.77243
SRI	-0.932805	10.8915	-6.01155	2.48091e-08	6.75558e-07	8.76795
SLC14A2	-0.951122	5.76654	-6.00984	2.50057e-08	6.79891e-07	8.76034
LOC100133315	-0.656061	6.81723	-6.00965	2.50281e-08	6.79891e-07	8.75947
MAGED1	0.5881	9.51352	6.0057	2.54901e-08	6.90788e-07	8.74181
PFKFB3	1.73839	9.161	6.00039	2.61248e-08	7.06304e-07	8.71807
DYRK2	-0.68609	9.7116	-5.99249	2.70977e-08	7.30866e-07	8.68278
LRP6	-0.649347	8.18025	-5.99005	2.74048e-08	7.37398e-07	8.6719
SOCS3	2.06438	8.59069	5.98606	2.79156e-08	7.48481e-07	8.65408
PADI2	-2.50432	9.36915	-5.98549	2.79895e-08	7.49576e-07	8.65153
TMEM171	-1.37094	8.621	-5.98412	2.81668e-08	7.53437e-07	8.64543
DHRS11	-1.93602	9.54796	-5.98265	2.83587e-08	7.5723e-07	8.63888
WARS	1.77983	9.95612	5.9774	2.9055e-08	7.74459e-07	8.61547
HLA-DPA1	1.4428	11.5661	5.97632	2.92013e-08	7.76532e-07	8.61062
ZNF415	-0.725423	5.67096	-5.97606	2.92354e-08	7.76532e-07	8.60949
RNF14	-0.580984	9.38869	-5.97487	2.93966e-08	7.79904e-07	8.60418
HIBCH	-0.865332	7.50268	-5.97066	2.99747e-08	7.94268e-07	8.58539
MATN2	-0.828831	7.84797	-5.97037	3.00147e-08	7.94268e-07	8.58411
SP110	1.05526	7.87005	5.97014	3.00457e-08	7.94268e-07	8.58311
PIK3R3	1.01731	8.16473	5.96397	3.09144e-08	8.14463e-07	8.5556
MTHFD2P7	0.729516	7.59338	5.95719	3.18972e-08	8.38408e-07	8.5254
C3	2.14997	9.68781	5.95155	3.27383e-08	8.58529e-07	8.50028
SLC10A5	-1.76427	7.61351	-5.94682	3.34593e-08	8.75415e-07	8.47926
CRYL1	-0.884129	8.41845	-5.94654	3.35023e-08	8.75533e-07	8.47802
EGR1	1.64473	9.96326	5.946	3.35857e-08	8.76507e-07	8.47563
DEFB1	-0.837972	5.11067	-5.94414	3.38748e-08	8.82222e-07	8.46735
PRSS22	0.688822	7.55729	5.94266	3.41069e-08	8.87249e-07	8.46076
FRRS1	-1.02527	8.04273	-5.93983	3.45559e-08	8.97899e-07	8.44815
LOC102725070	-1.2848	5.74947	-5.93846	3.47731e-08	9.01482e-07	8.4421
MPND	-0.726939	7.8797	-5.93089	3.6008e-08	9.30112e-07	8.40843
CXCL2	1.92115	7.79718	5.93037	3.6094e-08	9.30413e-07	8.40613
ABCA12	2.97559	7.52539	5.92518	3.69658e-08	9.50728e-07	8.3831
MTHFD2	0.833001	8.91675	5.9238	3.72023e-08	9.55729e-07	8.37695
HRSP12	-0.80062	7.55654	-5.92313	3.73172e-08	9.56517e-07	8.37397
HMOX1	-0.768364	8.05672	-5.92041	3.7786e-08	9.66352e-07	8.36193
IDO1	3.41393	7.88309	5.90771	4.0059e-08	1.01761e-06	8.30558
FBXL20	-0.592263	7.90282	-5.90546	4.04751e-08	1.02683e-06	8.29561
ELL2	1.01555	8.73918	5.90526	4.05127e-08	1.02683e-06	8.29471
NOS2	2.75843	10.1577	5.90079	4.13532e-08	1.04697e-06	8.2749
RAB17	-0.706084	7.2801	-5.8993	4.16372e-08	1.05299e-06	8.2683
VSIG10	-0.948755	7.85181	-5.89602	4.22689e-08	1.06659e-06	8.25378
PLVAP	1.05279	9.00665	5.89529	4.24116e-08	1.06823e-06	8.25053
CHPT1	-0.881829	9.59122	-5.8952	4.24283e-08	1.06823e-06	8.25014
SELM	0.867457	8.90723	5.89265	4.29285e-08	1.07963e-06	8.23884
KYNU	2.8032	7.44405	5.88578	4.43031e-08	1.11051e-06	8.20844
DENND4C	-0.620413	9.09608	-5.88356	4.47576e-08	1.11943e-06	8.19859
PLA2R1	-0.854395	6.90111	-5.8824	4.49965e-08	1.12394e-06	8.19346
CHP1	-0.645054	11.8407	-5.8822	4.50369e-08	1.12394e-06	8.19259
EPHA2	1.18158	8.93929	5.88072	4.53428e-08	1.13033e-06	8.18607
IL1B	3.04211	8.68423	5.87862	4.57826e-08	1.14005e-06	8.17675
PCSK1	1.79938	7.41907	5.87794	4.59258e-08	1.14236e-06	8.17374
UBD	1.82391	7.2919	5.87538	4.64672e-08	1.15204e-06	8.16244
SLFN13	0.693418	7.11838	5.87263	4.70574e-08	1.1654e-06	8.15027
SMPDL3B	-0.694799	8.61678	-5.87227	4.71336e-08	1.16549e-06	8.14871
CDH5	1.42202	8.30802	5.87074	4.74654e-08	1.1704e-06	8.14194
PDCD4	-1.24075	9.43283	-5.86787	4.80949e-08	1.18207e-06	8.12923
MLKL	1.04863	7.95251	5.86732	4.82159e-08	1.18358e-06	8.12681
HIF1A	1.144	11.0093	5.86633	4.84353e-08	1.18659e-06	8.12243
APLNR	1.11635	7.77346	5.8649	4.87528e-08	1.19308e-06	8.11613
SCIN	-1.59705	7.54055	-5.8626	4.92687e-08	1.20182e-06	8.10598
VWF	1.68889	7.87217	5.8609	4.96555e-08	1.20908e-06	8.09844
CTSH	1.20864	9.0325	5.86082	4.96728e-08	1.20908e-06	8.0981
PDZK1IP1	1.62195	10.281	5.85962	4.99457e-08	1.21442e-06	8.09282
PANK1	-0.778526	7.85868	-5.8592	5.00417e-08	1.21545e-06	8.09097
NFKBIZ	1.14543	9.29568	5.84696	5.29261e-08	1.2814e-06	8.03693
DUSP7	0.765503	9.60074	5.84661	5.30106e-08	1.28155e-06	8.03539
SAMD13	-1.19478	6.44791	-5.84647	5.30452e-08	1.28155e-06	8.03476
SLC7A5	1.50046	8.29733	5.84534	5.33193e-08	1.2868e-06	8.02979
MARVELD3	-0.879375	8.23153	-5.84368	5.37258e-08	1.29427e-06	8.02247
ANK3	-0.888478	7.22955	-5.84333	5.38123e-08	1.29457e-06	8.02092
IGHV4-59	2.08689	12.0508	5.83887	5.49208e-08	1.31984e-06	8.00126
LPHN2	1.64354	7.96955	5.8361	5.56205e-08	1.33364e-06	7.98905
KIAA0195	-0.615577	8.6952	-5.83589	5.56736e-08	1.33364e-06	7.98813
ZNF577	-0.644658	6.44946	-5.83556	5.57573e-08	1.33364e-06	7.98668
KIRREL	0.987975	7.45031	5.83079	5.6986e-08	1.36082e-06	7.96566
SDR16C5	1.21692	6.63575	5.82975	5.72556e-08	1.3644e-06	7.96111
RNF122	0.795992	7.15706	5.82868	5.75371e-08	1.36967e-06	7.95639
LRRN2	-0.898238	6.78967	-5.82771	5.77918e-08	1.37429e-06	7.95213
TMEM204	0.835573	8.31177	5.82454	5.86353e-08	1.39006e-06	7.93816
C9orf85	-0.602995	7.11439	-5.82453	5.86385e-08	1.39006e-06	7.9381
PAPLN	0.648545	7.30332	5.82108	5.95681e-08	1.40623e-06	7.92294
AGMAT	-0.788944	8.43313	-5.81686	6.07254e-08	1.43206e-06	7.90439
GRAMD4	-0.746419	8.62984	-5.8155	6.11046e-08	1.43724e-06	7.89839
PGM3	0.762796	8.23431	5.81095	6.23866e-08	1.46161e-06	7.87837
TMEM165	0.654398	10.0998	5.81059	6.24898e-08	1.46161e-06	7.87678
LIMS1	0.621871	8.98296	5.81057	6.24935e-08	1.46161e-06	7.87672
PGAP3	-0.827194	8.08787	-5.80775	6.33023e-08	1.47597e-06	7.86433
EYA2	-0.775865	6.8383	-5.80743	6.33955e-08	1.47663e-06	7.86291
MTM1	-0.959956	7.77599	-5.80356	6.45236e-08	1.49983e-06	7.8459
SLC38A5	0.861908	7.52856	5.80213	6.4945e-08	1.50808e-06	7.83963
SOCS1	0.960138	8.06602	5.79837	6.60683e-08	1.53103e-06	7.8231
MTMR11	-1.19503	8.78485	-5.79749	6.63315e-08	1.534e-06	7.81927
AHR	0.780959	9.95213	5.79663	6.65924e-08	1.5369e-06	7.81548
FSTL1	1.63131	9.32209	5.79578	6.68512e-08	1.54131e-06	7.81174
MT1E	-0.926836	9.6097	-5.79295	6.77172e-08	1.55811e-06	7.79934
LEF1	1.17277	7.06353	5.79233	6.7911e-08	1.56099e-06	7.79658
IGKV3D-11	2.45892	11.089	5.79066	6.84293e-08	1.56656e-06	7.78925
MT1X	-1.15266	9.22306	-5.78939	6.88254e-08	1.57404e-06	7.78369
PDP1	0.863847	9.70758	5.76818	7.57955e-08	1.72132e-06	7.69072
HAVCR1	-1.7227	6.07743	-5.76637	7.64199e-08	1.73376e-06	7.68281
RNA5SP356	-0.711595	6.76332	-5.7661	7.6516e-08	1.73421e-06	7.6816
C5orf63	-0.795729	7.22972	-5.76394	7.72713e-08	1.74784e-06	7.67214
CHN2	-1.01905	8.10194	-5.76302	7.75934e-08	1.75338e-06	7.66813
ATP1B3	-0.791217	9.6236	-5.75334	8.10793e-08	1.82851e-06	7.62578
MSN	1.49298	9.77576	5.75062	8.20854e-08	1.84753e-06	7.6139
ZNF91	-1.05212	8.99373	-5.74983	8.23818e-08	1.85054e-06	7.61042
SH3PXD2B	0.931632	8.00016	5.74952	8.24981e-08	1.85132e-06	7.60906
FAM57A	0.72328	8.82967	5.74636	8.36879e-08	1.87246e-06	7.59527
CRAT	-0.745076	8.83443	-5.74611	8.37826e-08	1.87246e-06	7.59418
SDHB	-0.598251	9.55583	-5.74593	8.38528e-08	1.87246e-06	7.59337
ATP2B1	-0.606307	9.17007	-5.74175	8.5457e-08	1.9019e-06	7.57511
ST3GAL1	1.52607	8.08146	5.74162	8.55058e-08	1.9019e-06	7.57456
TAP2	0.835035	8.73052	5.73912	8.64818e-08	1.91985e-06	7.56362
GABRP	1.289	7.28931	5.73876	8.66238e-08	1.92112e-06	7.56204
DUOXA2	3.44451	9.80842	5.73838	8.67721e-08	1.92253e-06	7.5604
ZNF763	-0.65424	6.13158	-5.73746	8.71346e-08	1.9268e-06	7.55638
SUCLG2P2	-0.611895	6.77105	-5.73253	8.91022e-08	1.96267e-06	7.53487
KCNE3	0.856983	7.44966	5.7323	8.91943e-08	1.96279e-06	7.53387
HID1	0.580293	8.90239	5.73137	8.95714e-08	1.96918e-06	7.52981
NRIP1	-0.666382	9.39726	-5.72839	9.07886e-08	1.99209e-06	7.5168
SLCO4A1	1.13038	7.92644	5.72817	9.08812e-08	1.99219e-06	7.51582
PDE4B	1.19353	6.84204	5.72518	9.21213e-08	2.01549e-06	7.50276
RAB11FIP1	-0.751734	8.63096	-5.72441	9.24419e-08	2.02055e-06	7.49941
IL6R	-0.586484	8.43969	-5.72303	9.30206e-08	2.03125e-06	7.4934
RN7SL706P	-0.853516	5.11867	-5.72204	9.34403e-08	2.03845e-06	7.48907
USP2	-1.24996	7.78192	-5.71482	9.65428e-08	2.09607e-06	7.4576
GBA2	-0.607667	9.25193	-5.7123	9.76502e-08	2.11606e-06	7.44661
PRDM1	1.57148	9.37618	5.71048	9.84563e-08	2.12947e-06	7.43869
IER2	0.642717	8.40368	5.70635	1.0031e-07	2.15928e-06	7.42072
JAK2	0.852123	8.2762	5.70312	1.01786e-07	2.1869e-06	7.40666
DUOX2	3.53846	11.1393	5.70273	1.01965e-07	2.18868e-06	7.40497
GOLIM4	-0.609024	10.3947	-5.69717	1.0456e-07	2.24014e-06	7.38076
TMIGD1	-3.06534	7.52919	-5.69289	1.06598e-07	2.27737e-06	7.36216
GPRC5B	0.90712	7.93347	5.69118	1.07427e-07	2.29292e-06	7.3547
ADAMTS1	1.48418	7.39414	5.69069	1.07663e-07	2.29364e-06	7.35259
RHOB	0.689161	9.2371	5.68349	1.11219e-07	2.35615e-06	7.32129
ZADH2	-0.691231	8.26817	-5.68253	1.11704e-07	2.36201e-06	7.3171
LAMC1	1.32867	8.46646	5.68089	1.12533e-07	2.3729e-06	7.30999
FLJ38379	-0.968873	5.80498	-5.67972	1.13126e-07	2.3832e-06	7.30492
GARS	0.597098	9.78406	5.67667	1.14694e-07	2.4115e-06	7.29166
MAB21L3	-1.27344	7.05307	-5.67649	1.14788e-07	2.4115e-06	7.29088
TSPAN7	-1.32977	9.84319	-5.67494	1.15592e-07	2.4239e-06	7.28416
CRELD2	0.74687	8.03959	5.67346	1.16367e-07	2.43567e-06	7.27772
OCRL	-0.61832	8.2015	-5.67003	1.18178e-07	2.46903e-06	7.26284
STAT1	1.07754	10.5227	5.66962	1.18399e-07	2.46958e-06	7.26104
LDHB	0.717259	9.32238	5.66957	1.18422e-07	2.46958e-06	7.26086
LANCL3	-0.823896	5.99986	-5.66841	1.19043e-07	2.47938e-06	7.25583
NUAK2	-0.722363	7.97613	-5.6666	1.20022e-07	2.49607e-06	7.24794
PLK3	0.923947	7.6738	5.65682	1.25425e-07	2.59418e-06	7.20554
SERPING1	1.57674	8.97698	5.6565	1.25607e-07	2.59418e-06	7.20414
NIPAL1	-1.17726	8.67861	-5.65585	1.25973e-07	2.59842e-06	7.20134
SMPDL3A	-1.14725	9.43581	-5.65226	1.28027e-07	2.63122e-06	7.18577
PLXNA2	-0.799684	8.03335	-5.65177	1.28308e-07	2.63461e-06	7.18366
SELENBP1	-1.63465	10.755	-5.64982	1.29439e-07	2.65543e-06	7.17521
PTRF	0.927905	7.60324	5.64311	1.334e-07	2.71873e-06	7.14618
ADCY9	-0.584619	8.01738	-5.64298	1.33483e-07	2.71873e-06	7.14559
COQ5	-0.602561	7.94053	-5.6387	1.36076e-07	2.76732e-06	7.12706
SLC12A4	0.676051	7.5152	5.6363	1.37551e-07	2.79409e-06	7.11668
NR1I2	-0.890188	7.08192	-5.63465	1.38573e-07	2.80982e-06	7.10956
TUBA1A	0.846846	8.63686	5.63168	1.40434e-07	2.84247e-06	7.09672
IER3	1.04299	9.79211	5.6267	1.43612e-07	2.89905e-06	7.07517
ATP10D	0.62248	7.48597	5.62509	1.44653e-07	2.91488e-06	7.06822
NXPE2	-1.51374	7.22397	-5.62113	1.47247e-07	2.96451e-06	7.05112
PTPN21	-0.67858	7.56516	-5.61943	1.48371e-07	2.97777e-06	7.04379
SPARC	1.53931	10.7199	5.61935	1.48428e-07	2.97777e-06	7.04342
NAT2	-1.13579	6.6475	-5.61934	1.4843e-07	2.97777e-06	7.04341
GIMAP4	1.23897	6.91357	5.61755	1.49631e-07	2.99476e-06	7.03565
PCSK5	-1.17547	8.41011	-5.61749	1.49672e-07	2.99476e-06	7.03539
RETSAT	-0.95512	10.1433	-5.61722	1.49854e-07	2.99576e-06	7.03422
XPNPEP2	-1.38697	6.95322	-5.61515	1.51247e-07	3.02096e-06	7.02531
CA12	-0.907153	11.125	-5.61293	1.52765e-07	3.0459e-06	7.0157
LYN	1.19278	9.69523	5.61084	1.54202e-07	3.07187e-06	7.00669
HOXB5	-0.952223	7.19335	-5.61049	1.54443e-07	3.07398e-06	7.00518
GLTP	-0.611199	8.52384	-5.60839	1.55906e-07	3.09495e-06	6.99611
ACACB	-0.709746	7.30541	-5.60659	1.57164e-07	3.11719e-06	6.98838
ATP1B3P1	-0.615335	6.76943	-5.6049	1.58364e-07	3.13825e-06	6.98106
TSPAN18	0.846068	7.29811	5.60252	1.6006e-07	3.16911e-06	6.9708
BCL3	0.587814	9.87289	5.59986	1.61976e-07	3.20424e-06	6.95935
ADAL	-0.663878	6.52514	-5.59686	1.64164e-07	3.24471e-06	6.94643
MFNG	0.765157	7.22072	5.59496	1.65568e-07	3.26961e-06	6.93824
CHP2	-2.29299	7.97997	-5.59308	1.66972e-07	3.28875e-06	6.93012
MT1IP	-0.650267	6.9723	-5.59143	1.68208e-07	3.30737e-06	6.92301
MIR8071-1	1.8696	9.98898	5.5907	1.68755e-07	3.31525e-06	6.91989
PLOD1	0.699525	8.93701	5.59043	1.68957e-07	3.31635e-06	6.91874
RNFT1	-0.591544	8.78497	-5.58927	1.69837e-07	3.33075e-06	6.91374
CBFB	0.696769	9.24148	5.58907	1.69992e-07	3.33091e-06	6.91286
GIMAP1-GIMAP5	1.08253	7.90743	5.58795	1.70849e-07	3.34481e-06	6.90802
TMEM177	-0.583748	7.90688	-5.58524	1.72927e-07	3.38257e-06	6.89639
RNU6-1165P	-0.633235	4.2187	-5.57852	1.78205e-07	3.47385e-06	6.86746
ACER2	-0.764831	6.64498	-5.57734	1.79147e-07	3.48623e-06	6.86239
C1R	1.54072	9.14737	5.57691	1.79493e-07	3.48998e-06	6.86053
PLEKHG1	0.593175	7.49709	5.57437	1.81544e-07	3.52381e-06	6.8496
CYP4F2	-1.12188	6.6899	-5.57068	1.84556e-07	3.57313e-06	6.83376
IFT57	-0.601658	7.60722	-5.57015	1.84997e-07	3.57861e-06	6.83147
MYLIP	-0.723278	8.01759	-5.56722	1.87436e-07	3.61348e-06	6.81886
PIGZ	-1.62419	8.14998	-5.56032	1.93296e-07	3.70444e-06	6.78925
FKBP11	1.11099	8.09897	5.56004	1.93537e-07	3.70593e-06	6.78805
ZAK	0.822843	6.59267	5.55859	1.94795e-07	3.72687e-06	6.78181
IGKV1D-33	1.99985	10.7784	5.55611	1.96965e-07	3.75574e-06	6.77115
STEAP4	2.31769	7.26621	5.55573	1.97292e-07	3.75881e-06	6.76956
SNX4	-0.662894	7.90417	-5.55332	1.99425e-07	3.79327e-06	6.75922
DTX4	-0.69842	8.89778	-5.55294	1.99769e-07	3.79327e-06	6.75756
PDIA3	0.634773	11.1222	5.55115	2.0137e-07	3.81488e-06	6.74988
C4B	1.64381	8.05314	5.54457	2.07359e-07	3.91774e-06	6.72168
HOXA7	-0.87873	8.17967	-5.54202	2.09736e-07	3.95279e-06	6.71072
TMEM236	-2.17788	8.27245	-5.54142	2.10294e-07	3.96002e-06	6.70816
ADARB1	0.626637	7.12732	5.53468	2.16705e-07	4.06389e-06	6.67928
HAPLN3	1.11295	7.23896	5.53322	2.18118e-07	4.08052e-06	6.67303
ELOVL5	1.4422	8.79492	5.53284	2.18483e-07	4.08374e-06	6.67142
ACO2	-0.641539	10.195	-5.5319	2.19402e-07	4.09754e-06	6.66738
TM4SF18	1.32327	6.88851	5.53027	2.21e-07	4.12401e-06	6.6604
RNU1-59P	1.14144	6.91546	5.52818	2.23064e-07	4.1557e-06	6.65146
RAB8B	1.0068	8.15152	5.5279	2.23345e-07	4.15751e-06	6.65025
ZNF252P	-0.681227	6.72991	-5.52692	2.24321e-07	4.17226e-06	6.64605
SELP	2.036	7.11715	5.52664	2.246e-07	4.17402e-06	6.64486
IL33	1.45873	6.20289	5.52227	2.29004e-07	4.24893e-06	6.62618
HSP90B1	0.628413	12.2341	5.52146	2.29831e-07	4.26079e-06	6.62271
PHLDA2	0.591281	8.96922	5.51782	2.33584e-07	4.3233e-06	6.60714
SLC15A3	0.788888	7.5614	5.51274	2.38911e-07	4.41111e-06	6.58545
CEBPB	0.959422	8.81695	5.50708	2.44996e-07	4.51246e-06	6.56126
LDLR	0.773189	10.4343	5.50577	2.46433e-07	4.53525e-06	6.55564
EPB41L4B	-0.955904	8.00052	-5.50422	2.48133e-07	4.55959e-06	6.54903
SCD	1.20336	9.70101	5.5042	2.48157e-07	4.55959e-06	6.54893
ABHD3	-0.839573	9.54814	-5.50271	2.49796e-07	4.58599e-06	6.5426
ALDH5A1	-0.715246	6.57221	-5.50187	2.50732e-07	4.59945e-06	6.53901
ICAM2	1.08421	8.51958	5.50035	2.52435e-07	4.62322e-06	6.5325
CYP4F12	-1.19019	7.39929	-5.49384	2.59823e-07	4.73181e-06	6.50476
SLC6A6	1.34228	8.15646	5.49224	2.61675e-07	4.76173e-06	6.49793
TNFRSF10B	0.715697	8.46073	5.4882	2.66406e-07	4.83619e-06	6.4807
NGEF	-0.733786	7.45184	-5.48675	2.68126e-07	4.86354e-06	6.47451
NR4A2	1.7983	8.2327	5.48642	2.68519e-07	4.86678e-06	6.4731
MIR196A1	-1.02891	7.20584	-5.48594	2.69089e-07	4.87322e-06	6.47107
SDHD	-0.601611	9.61531	-5.48473	2.70535e-07	4.8955e-06	6.46591
COL1A1	1.63151	9.84749	5.48368	2.71801e-07	4.91059e-06	6.46142
PLXND1	0.869138	7.90651	5.48288	2.72761e-07	4.924e-06	6.45804
INSC	0.990275	6.91531	5.48028	2.75922e-07	4.97288e-06	6.44696
PMEPA1	0.718162	8.49235	5.47715	2.7978e-07	5.03073e-06	6.43361
PTPRM	1.09059	7.83634	5.47603	2.81166e-07	5.04765e-06	6.42886
QSOX1	0.732067	10.4241	5.47557	2.81741e-07	5.05398e-06	6.42689
CCDC167	0.59684	7.02818	5.47498	2.82475e-07	5.05723e-06	6.42439
SLC20A1	-0.946665	8.85223	-5.47489	2.8259e-07	5.05723e-06	6.424
CASP1	1.21804	8.94406	5.47316	2.84769e-07	5.09175e-06	6.41661
CD40	0.847324	6.55189	5.46692	2.92743e-07	5.21352e-06	6.39007
ENG	1.36253	9.26127	5.46677	2.9293e-07	5.21352e-06	6.38945
HPGDS	-1.2154	6.13565	-5.46589	2.94075e-07	5.2257e-06	6.3857
RNF5	-0.671939	7.84927	-5.46405	2.96477e-07	5.26426e-06	6.37788
TNC	2.46904	8.7951	5.46213	2.99009e-07	5.29679e-06	6.36971
ECH1	-0.694953	11.1706	-5.46042	3.01283e-07	5.33292e-06	6.36243
TNIP3	3.38225	8.25211	5.45923	3.02869e-07	5.35682e-06	6.35738
GPD1L	-1.05562	8.20979	-5.45589	3.07366e-07	5.42139e-06	6.34321
DDX26B	-0.636143	6.96959	-5.45564	3.07713e-07	5.42139e-06	6.34212
ITPKA	-0.623991	7.33191	-5.45484	3.08805e-07	5.4364e-06	6.33872
GPX8	1.12278	6.05316	5.45118	3.13833e-07	5.50784e-06	6.3232
CRIP2	0.885027	8.47462	5.44797	3.18315e-07	5.58124e-06	6.30957
EMB	1.1144	7.2257	5.44784	3.18507e-07	5.58124e-06	6.30899
DISP2	-0.644245	7.71556	-5.44295	3.25452e-07	5.6881e-06	6.28825
IL7R	1.999	8.29432	5.44176	3.27167e-07	5.70657e-06	6.2832
LY6E	0.941187	7.9651	5.44064	3.28794e-07	5.73055e-06	6.27844
IGFBP5	2.04216	9.25853	5.44026	3.29339e-07	5.73564e-06	6.27685
MRPL35	-0.77339	8.59095	-5.4332	3.39758e-07	5.8945e-06	6.24691
IGKV3D-20	2.21201	11.2588	5.43255	3.40733e-07	5.9024e-06	6.24416
SLC25A4	-0.613073	8.56344	-5.43066	3.43581e-07	5.93202e-06	6.23616
IYD	-0.838654	6.71375	-5.42736	3.48619e-07	5.99439e-06	6.22217
TNFRSF12A	0.84243	9.50525	5.42671	3.4962e-07	6.00141e-06	6.21942
ARV1	-0.71889	8.24407	-5.42642	3.50066e-07	6.00452e-06	6.21819
KLC4	-0.627273	7.75533	-5.4252	3.51954e-07	6.02486e-06	6.21302
ST3GAL4	0.986783	8.63845	5.42514	3.52047e-07	6.02486e-06	6.21277
TRERF1	0.679556	6.58161	5.42414	3.53608e-07	6.04701e-06	6.20852
AGFG2	-0.605426	7.41549	-5.42169	3.57442e-07	6.0911e-06	6.19815
FAM46C	1.01184	9.65981	5.41809	3.63161e-07	6.16669e-06	6.1829
PTGS2	2.72841	8.06488	5.41799	3.63322e-07	6.16669e-06	6.18248
RILPL2	0.805159	7.09663	5.41695	3.64981e-07	6.1764e-06	6.1781
FAM162A	-1.06702	8.0101	-5.4162	3.66185e-07	6.19156e-06	6.17493
AHCYL2	-1.07799	10.9385	-5.41469	3.68636e-07	6.22434e-06	6.16852
NAT1	-0.643664	6.39158	-5.41318	3.71099e-07	6.26126e-06	6.16212
TGFBR2	0.670967	9.87944	5.40517	3.84406e-07	6.44746e-06	6.12827
LRRC19	-1.86019	8.15807	-5.40351	3.87225e-07	6.48517e-06	6.12125
C6orf136	-0.757555	7.85284	-5.40106	3.91417e-07	6.54207e-06	6.11091
GBP4	1.8576	7.77415	5.40102	3.91479e-07	6.54207e-06	6.11076
KLHDC2	-0.59183	8.543	-5.39878	3.95362e-07	6.59458e-06	6.10127
TMED6	-0.941131	5.83477	-5.39726	3.98012e-07	6.63159e-06	6.09486
MXI1	-0.729638	8.29135	-5.39187	4.07551e-07	6.77312e-06	6.07211
MAML3	-0.78121	7.8108	-5.39002	4.10884e-07	6.81108e-06	6.06428
MPI	-0.603615	8.22508	-5.38823	4.14124e-07	6.85478e-06	6.05674
ABCA5	-0.829039	7.41008	-5.38553	4.1905e-07	6.93127e-06	6.04538
CSRNP1	0.744977	7.19727	5.3852	4.19661e-07	6.93632e-06	6.04398
PAPSS2	-0.743402	10.9761	-5.37946	4.30368e-07	7.0875e-06	6.01978
SLC7A11	1.89774	8.19416	5.37917	4.30923e-07	7.08916e-06	6.01854
RGCC	1.05423	8.23558	5.37907	4.31102e-07	7.08916e-06	6.01814
CDH11	1.31491	8.3683	5.37891	4.31406e-07	7.08916e-06	6.01746
PTGDR	-1.24682	7.74425	-5.37643	4.36133e-07	7.16166e-06	6.007
GNA11	-0.906393	10.181	-5.37613	4.36716e-07	7.16605e-06	6.00571
IDH2	0.582189	10.2929	5.37571	4.37517e-07	7.17402e-06	6.00395
TRAK2	-0.638035	8.84193	-5.37111	4.46429e-07	7.3096e-06	5.98458
GABRA2	-1.01622	5.71066	-5.36831	4.51938e-07	7.38393e-06	5.9728
CYYR1	1.34484	7.53738	5.36831	4.51945e-07	7.38393e-06	5.97279
ARID5A	0.644005	7.26611	5.36598	4.56583e-07	7.449e-06	5.96298
ABCC13	-0.778635	5.56183	-5.36581	4.56928e-07	7.44927e-06	5.96226
NCS1	0.671162	7.07568	5.36489	4.58766e-07	7.46851e-06	5.9584
PPP1R14C	-0.605281	7.27409	-5.36434	4.59882e-07	7.4791e-06	5.95607
RNF213	1.03387	9.59066	5.36285	4.62876e-07	7.51388e-06	5.94984
TESC	0.750687	7.84649	5.36206	4.64497e-07	7.53481e-06	5.94648
F2R	1.17511	7.63711	5.36138	4.65864e-07	7.55159e-06	5.94366
PDHA1	-0.755991	9.23309	-5.36069	4.67284e-07	7.5692e-06	5.94074
NEK3	-0.726803	7.7146	-5.36048	4.67709e-07	7.57069e-06	5.93986
RAPGEFL1	-1.28289	9.01191	-5.35834	4.72118e-07	7.63117e-06	5.93085
ICAM1	1.79457	8.74379	5.35783	4.73164e-07	7.64265e-06	5.92873
ZNF844	-0.697747	5.8878	-5.35683	4.75246e-07	7.66707e-06	5.92451
SERPINA3	2.22232	8.01834	5.35678	4.75352e-07	7.66707e-06	5.9243
COL6A3	1.90898	9.05752	5.35403	4.81107e-07	7.7489e-06	5.91274
ACKR1	0.873642	7.00559	5.3537	4.81807e-07	7.75467e-06	5.91134
IL1R1	1.45732	8.41907	5.353	4.83275e-07	7.77278e-06	5.90842
ADCY6	-0.686961	8.72976	-5.34738	4.95306e-07	7.96065e-06	5.88481
PGM1	-0.656596	8.82836	-5.34255	5.05885e-07	8.11919e-06	5.86452
TEK	1.08998	7.00102	5.34195	5.07211e-07	8.13472e-06	5.862
HLA-DPB1	1.26003	10.7017	5.34144	5.08345e-07	8.14278e-06	5.85986
BAG2	0.818068	7.14525	5.3403	5.10897e-07	8.17075e-06	5.85505
NAPEPLD	-0.963697	8.22891	-5.33975	5.12123e-07	8.1846e-06	5.85275
FBXO16	0.919373	6.38147	5.33895	5.13921e-07	8.20756e-06	5.84938
TTC9	0.618261	7.93527	5.33875	5.14354e-07	8.20869e-06	5.84858
AREG	1.5435	8.94805	5.33241	5.28802e-07	8.40973e-06	5.82198
LBH	0.808992	7.22296	5.33171	5.30438e-07	8.42984e-06	5.81901
PPP1R3B	-0.585624	7.43559	-5.33031	5.33689e-07	8.46366e-06	5.81315
PCOLCE	1.35253	8.93118	5.32772	5.39751e-07	8.54199e-06	5.8023
ASPA	-0.653015	4.5299	-5.32593	5.43992e-07	8.59014e-06	5.79479
EDN1	-0.998663	7.95293	-5.32485	5.46557e-07	8.60248e-06	5.79027
CASP4	1.02937	8.15987	5.32483	5.46604e-07	8.60248e-06	5.79019
DNAJC10	0.789436	9.24202	5.32409	5.48379e-07	8.62365e-06	5.78708
NRN1	0.792166	6.93924	5.32379	5.49082e-07	8.62365e-06	5.78585
AKAP2	0.885175	7.1943	5.32351	5.49769e-07	8.62837e-06	5.78465
ENPP2	1.32102	8.78361	5.32273	5.51626e-07	8.65153e-06	5.78141
ZNF57	-0.840707	7.9703	-5.31835	5.62273e-07	8.80029e-06	5.76306
TSTA3	0.81876	9.95411	5.3122	5.77556e-07	9.02705e-06	5.73731
MEP1AP4	-1.27183	6.93275	-5.31199	5.78089e-07	9.02916e-06	5.73643
SUCLG2	-0.871441	9.4493	-5.30925	5.85025e-07	9.12007e-06	5.72498
GPR125	-0.914837	8.10464	-5.3053	5.95179e-07	9.23891e-06	5.70846
TRANK1	-0.721813	8.67271	-5.30501	5.95935e-07	9.24432e-06	5.70724
UNC13D	0.934564	8.30028	5.30343	6.00051e-07	9.28913e-06	5.70064
COL1A2	1.60755	9.51083	5.29994	6.09249e-07	9.39949e-06	5.68604
PRAF2	0.692534	7.49463	5.29961	6.10127e-07	9.40664e-06	5.68466
ENTPD1	1.50947	8.49088	5.29823	6.1379e-07	9.4567e-06	5.67891
SLFN11	1.50333	7.54485	5.29674	6.17793e-07	9.50547e-06	5.67267
CWH43	-2.42224	7.06935	-5.29626	6.19071e-07	9.51513e-06	5.67069
RIPK2	1.04042	7.76937	5.29619	6.19259e-07	9.51513e-06	5.6704
UGT2B10	-0.885803	5.66233	-5.29013	6.35809e-07	9.74964e-06	5.64508
GJA1	1.6247	7.60623	5.28881	6.39477e-07	9.78607e-06	5.63956
SBNO2	0.707398	8.68146	5.2874	6.43405e-07	9.83955e-06	5.63369
HLA-DQB1	1.40913	8.35864	5.28623	6.467e-07	9.88145e-06	5.62878
AAED1	1.01067	7.49754	5.28584	6.47777e-07	9.88145e-06	5.62719
TCF4	1.38663	8.78109	5.2848	6.5071e-07	9.91122e-06	5.62285
FILIP1L	0.794405	6.83296	5.28049	6.63022e-07	1.00785e-05	5.60487
CCDC109B	1.01187	7.30545	5.27958	6.65641e-07	1.0106e-05	5.60108
GPR39	-0.926051	8.25899	-5.27826	6.69471e-07	1.01561e-05	5.59558
GPR183	1.37525	6.85337	5.27542	6.77792e-07	1.02686e-05	5.58372
STAT2	0.745075	8.55769	5.27511	6.787e-07	1.02755e-05	5.58244
INPP5D	1.08335	8.55248	5.27464	6.80092e-07	1.02897e-05	5.58047
C5orf52	-0.704294	5.81886	-5.27326	6.8418e-07	1.03447e-05	5.57472
OTUB2	0.700784	7.02199	5.27177	6.88614e-07	1.03979e-05	5.56852
PHC3	-0.585038	7.62884	-5.26725	7.0226e-07	1.05828e-05	5.5497
SMIM14	-0.806915	9.5418	-5.26696	7.03142e-07	1.05891e-05	5.54849
GEM	1.12663	7.28295	5.2665	7.04551e-07	1.06033e-05	5.54657
CH25H	0.956493	6.93338	5.26475	7.09928e-07	1.06701e-05	5.53928
IGKV3OR2-268	2.00477	9.60442	5.26431	7.11266e-07	1.06831e-05	5.53747
RN7SL688P	-0.62825	6.26265	-5.25859	7.29129e-07	1.09225e-05	5.51367
GRTP1	-0.581232	8.275	-5.2562	7.36734e-07	1.10219e-05	5.50372
THBD	0.839685	7.58918	5.25565	7.38501e-07	1.10354e-05	5.50142
OLFM1	0.712748	7.16195	5.25348	7.45453e-07	1.1123e-05	5.49243
ROBO1	1.34535	7.91947	5.25227	7.49386e-07	1.1167e-05	5.48738
ARHGAP44	-1.25383	7.83809	-5.25148	7.51959e-07	1.11907e-05	5.48409
IGSF3	-0.826139	7.74967	-5.25027	7.55903e-07	1.12347e-05	5.47908
RFK	-0.581879	9.48534	-5.24765	7.64545e-07	1.1344e-05	5.46817
DOC2B	1.0873	7.69764	5.24676	7.67494e-07	1.13771e-05	5.46448
TMEM9B	-0.649565	9.52547	-5.24622	7.69293e-07	1.13964e-05	5.46223
JAM2	1.01282	7.81815	5.24532	7.72296e-07	1.1426e-05	5.4585
ZNF532	0.859767	7.34851	5.2442	7.76056e-07	1.14741e-05	5.45384
LRRC31	-1.42867	6.91187	-5.24296	7.80216e-07	1.15206e-05	5.44871
LZIC	-0.6143	7.869	-5.23762	7.98468e-07	1.17519e-05	5.42653
LPGAT1	0.86297	8.77773	5.23501	8.07533e-07	1.18699e-05	5.4157
RCN1	0.646147	9.59861	5.23316	8.14009e-07	1.1942e-05	5.40804
APOL3	0.748929	6.69472	5.23144	8.20072e-07	1.2002e-05	5.40092
MCAM	1.32007	8.11094	5.23017	8.24593e-07	1.20428e-05	5.39565
MB21D1	1.06716	6.9069	5.22971	8.26234e-07	1.2059e-05	5.39374
ST3GAL5	0.66291	7.13787	5.22741	8.34499e-07	1.21331e-05	5.38419
CCDC69	1.14277	7.58017	5.2273	8.34894e-07	1.21331e-05	5.38374
LDB2	0.912628	7.39295	5.22725	8.35076e-07	1.21331e-05	5.38353
RNF103	-0.636719	8.81578	-5.22713	8.35509e-07	1.21331e-05	5.38304
NDUFA5	-0.624582	7.19213	-5.22407	8.46646e-07	1.22779e-05	5.37034
SLC25A23	-0.936702	8.27141	-5.2223	8.53133e-07	1.23405e-05	5.36302
MMP3	3.77188	8.53742	5.21838	8.67693e-07	1.25432e-05	5.34679
RASSF5	1.03795	7.97504	5.2163	8.75514e-07	1.26482e-05	5.33818
LMAN1	0.74008	10.3208	5.21253	8.89875e-07	1.28475e-05	5.32258
MTMR8	-0.772143	6.49371	-5.21167	8.93202e-07	1.28755e-05	5.319
CCL24	1.25502	8.35207	5.21055	8.97505e-07	1.2919e-05	5.31439
NUCB2	0.906569	8.9999	5.21051	8.97675e-07	1.2919e-05	5.31421
LOC101059935	-1.12097	5.61118	-5.20989	9.00082e-07	1.29454e-05	5.31164
MT1L	-0.818826	9.19864	-5.20974	9.00651e-07	1.29454e-05	5.31104
PLEKHG2	0.806161	7.85715	5.20642	9.13658e-07	1.31075e-05	5.29729
PRR15	-1.15178	9.61539	-5.20249	9.29277e-07	1.33203e-05	5.28104
RHBDF2	0.609766	7.03221	5.20021	9.38429e-07	1.34289e-05	5.27164
MT1P1	-0.911827	12.0498	-5.19721	9.50654e-07	1.35953e-05	5.25923
IGHV3-74	1.58906	12.1949	5.19515	9.59114e-07	1.36904e-05	5.25073
VCAM1	1.54043	7.53952	5.19148	9.74401e-07	1.38912e-05	5.23557
FMO5	-1.58678	8.16936	-5.19087	9.76951e-07	1.39188e-05	5.23307
AKAP1	-0.913874	9.24124	-5.19009	9.80252e-07	1.39571e-05	5.22984
PTPN14	0.644277	7.33633	5.18938	9.83243e-07	1.39909e-05	5.22691
CMTM7	0.713485	7.95521	5.1887	9.86113e-07	1.40054e-05	5.22412
ITGB3	1.0031	7.30958	5.18347	1.00857e-06	1.42797e-05	5.20253
ARL4C	0.682419	7.41265	5.18062	1.02103e-06	1.44445e-05	5.19076
ZNF681	-0.771475	5.38817	-5.18051	1.02148e-06	1.44445e-05	5.19034
PCK1	-2.90188	8.1239	-5.17638	1.03982e-06	1.46764e-05	5.17328
CD93	1.43259	8.26198	5.17548	1.04381e-06	1.47236e-05	5.16961
TWSG1	0.703989	8.25226	5.17456	1.04798e-06	1.4764e-05	5.16579
CYB5R2	0.646066	7.16021	5.17384	1.05119e-06	1.48001e-05	5.16286
NDUFA2	-0.631999	8.71459	-5.17099	1.06416e-06	1.49518e-05	5.15111
NUDT16P1	-0.685664	8.20708	-5.1709	1.0646e-06	1.49518e-05	5.15071
CLDN23	-0.644481	8.45518	-5.16896	1.07349e-06	1.50394e-05	5.14274
MMP7	2.93509	7.41195	5.16543	1.08989e-06	1.52237e-05	5.1282
PLCD3	-0.90319	9.54074	-5.16543	1.0899e-06	1.52237e-05	5.1282
SLC35D2	-0.748886	9.51321	-5.1649	1.09237e-06	1.52459e-05	5.12603
AGPAT4	0.992659	6.94452	5.1645	1.09427e-06	1.52459e-05	5.12436
HOMER1	0.63847	5.53008	5.1642	1.09567e-06	1.52561e-05	5.12313
ERG	0.941484	6.68966	5.16188	1.10662e-06	1.53897e-05	5.1136
HYOU1	0.6183	9.83324	5.16167	1.1076e-06	1.53939e-05	5.11276
MICALCL	-0.748994	6.74093	-5.15936	1.11865e-06	1.55375e-05	5.10324
CREBRF	-0.598848	7.66871	-5.15684	1.13083e-06	1.56728e-05	5.09286
CYCS	-0.647596	9.00027	-5.15595	1.13513e-06	1.57092e-05	5.08922
CHST11	1.17061	8.76709	5.15572	1.13624e-06	1.5715e-05	5.08829
BTG2	1.00674	9.36864	5.15417	1.14386e-06	1.58108e-05	5.08188
IGHV3-35	1.23871	10.3185	5.15354	1.14696e-06	1.58439e-05	5.07929
PLIN2	-0.687322	7.96535	-5.15137	1.15764e-06	1.59721e-05	5.07041
PIM2	2.01765	9.19753	5.14921	1.16844e-06	1.61112e-05	5.06151
PRDX4	0.630165	7.4983	5.14197	1.20522e-06	1.65481e-05	5.03181
OSBPL8	0.735025	8.29705	5.14121	1.20919e-06	1.65725e-05	5.02866
RNF128	-0.903855	8.00507	-5.13948	1.21816e-06	1.66653e-05	5.02158
NID1	1.3868	8.01278	5.13849	1.22332e-06	1.67259e-05	5.01753
SNORD60	1.05881	6.8675	5.13687	1.23186e-06	1.68122e-05	5.01086
SMOX	0.980566	7.52881	5.1325	1.25509e-06	1.71061e-05	4.99296
MAP3K13	-0.770196	7.63034	-5.1312	1.26211e-06	1.71632e-05	4.98762
VDR	-0.737616	9.32436	-5.13088	1.26384e-06	1.71764e-05	4.98631
VSIG1	2.98789	7.46558	5.12812	1.27883e-06	1.73387e-05	4.97501
COL4A1	1.49136	8.24969	5.12261	1.30931e-06	1.77257e-05	4.95245
HIGD1A	-0.845615	9.56869	-5.12084	1.31927e-06	1.78125e-05	4.94518
CXorf36	0.850704	5.99882	5.12044	1.32155e-06	1.78221e-05	4.94353
IGHV3OR16-7	1.65813	11.45	5.12025	1.32262e-06	1.78259e-05	4.94276
VIM	1.16944	10.0992	5.1199	1.32457e-06	1.78416e-05	4.94135
AKIRIN2	0.60845	9.10583	5.11947	1.327e-06	1.78637e-05	4.93959
TGFBI	1.40844	9.62234	5.11903	1.32955e-06	1.78874e-05	4.93775
CLDN1	1.79306	7.81909	5.11431	1.35658e-06	1.81618e-05	4.91847
ELTD1	1.90296	7.28646	5.11263	1.36637e-06	1.82718e-05	4.91158
RNU6-570P	-1.17771	5.46683	-5.11168	1.37189e-06	1.83269e-05	4.90772
A1CF	-1.31312	8.58364	-5.11015	1.3809e-06	1.84255e-05	4.90145
GPR160	-1.08583	8.27923	-5.10677	1.40095e-06	1.86056e-05	4.88764
IGKV1OR2-3	2.3361	10.8659	5.10658	1.40214e-06	1.86105e-05	4.88683
ADAM19	1.17794	8.19829	5.10259	1.42618e-06	1.89185e-05	4.87055
SPR	-0.62971	8.68138	-5.10006	1.44163e-06	1.90901e-05	4.86023
ARHGDIB	1.28173	9.1451	5.09959	1.44453e-06	1.91173e-05	4.8583
EPHX2	-1.35191	7.32188	-5.0987	1.45003e-06	1.9179e-05	4.85466
IL6ST	0.709128	9.9577	5.09672	1.46235e-06	1.93194e-05	4.84656
ANXA1	1.84642	10.9214	5.09589	1.46749e-06	1.9376e-05	4.8432
PLXNA1	0.625815	8.3129	5.09082	1.49954e-06	1.97762e-05	4.82251
FEZ1	0.708426	5.96141	5.08811	1.51694e-06	1.99941e-05	4.81146
TMEM72	-0.95771	7.71178	-5.0875	1.52091e-06	2.00253e-05	4.80896
COL15A1	1.40476	8.15399	5.08734	1.52196e-06	2.00253e-05	4.8083
EHHADH	-0.862011	7.26109	-5.08715	1.52319e-06	2.00299e-05	4.80752
WASL	-0.630331	10.0878	-5.0861	1.52998e-06	2.01076e-05	4.80326
CLU	1.36855	8.03742	5.08512	1.53639e-06	2.01685e-05	4.79926
CYR61	1.64251	7.46917	5.08105	1.56327e-06	2.04924e-05	4.78265
BGN	1.7869	9.24152	5.07867	1.57919e-06	2.06824e-05	4.77295
GUCA2A	-2.66576	9.82666	-5.07716	1.58933e-06	2.07913e-05	4.76682
CXCR4	1.37573	7.44572	5.07697	1.59059e-06	2.07958e-05	4.76606
PPARD	-0.66811	8.77684	-5.07683	1.59159e-06	2.0797e-05	4.76546
CD2AP	-0.634866	10.4961	-5.07661	1.59307e-06	2.08042e-05	4.76457
JAK3	1.08172	7.36515	5.07547	1.60082e-06	2.08695e-05	4.75993
GRK5	0.709169	7.27379	5.07407	1.61034e-06	2.09695e-05	4.75425
PLEKHG6	-1.02878	7.81683	-5.0737	1.61292e-06	2.09911e-05	4.75272
LAMB2	0.699305	8.38236	5.07129	1.6295e-06	2.11583e-05	4.74292
KCNK5	-0.87092	7.78761	-5.06881	1.64676e-06	2.13581e-05	4.73283
SLC2A3	1.73158	8.07956	5.06503	1.67342e-06	2.16667e-05	4.71746
PANX1	0.781578	8.14892	5.06503	1.67342e-06	2.16667e-05	4.71746
RHOJ	1.29215	7.87368	5.06382	1.68207e-06	2.17618e-05	4.71253
ARHGAP29	1.26962	6.02972	5.06373	1.68268e-06	2.17618e-05	4.71218
PLAU	1.79112	8.57574	5.06275	1.6897e-06	2.18276e-05	4.70819
PRPS1	0.851572	7.62589	5.06224	1.69338e-06	2.18629e-05	4.70611
ZBP1	1.17121	7.93336	5.05823	1.72244e-06	2.21875e-05	4.68982
IGHV3-73	1.73745	11.708	5.05802	1.72398e-06	2.21893e-05	4.68896
BEST4	-1.8305	8.09963	-5.05503	1.746e-06	2.24343e-05	4.67681
TCN1	2.78935	7.59516	5.05362	1.7565e-06	2.25241e-05	4.67108
DEGS1	0.689126	7.67821	5.05345	1.75778e-06	2.25278e-05	4.67038
PFKFB2	-0.848077	8.13975	-5.04887	1.7922e-06	2.28555e-05	4.65182
C4BPB	1.67457	6.67973	5.04863	1.79404e-06	2.28555e-05	4.65083
SEMA6D	-0.751726	8.22893	-5.04852	1.79486e-06	2.28555e-05	4.65039
S100A8	3.26043	7.92711	5.0464	1.81109e-06	2.30039e-05	4.64178
NQO2	0.743831	8.13447	5.04609	1.81345e-06	2.30203e-05	4.64054
TMEM106A	0.674614	8.04409	5.04557	1.81751e-06	2.3059e-05	4.63839
DPYD	0.79428	8.02816	5.04459	1.82506e-06	2.31031e-05	4.63443
TGFB1	1.00666	7.76848	5.04215	1.84398e-06	2.33167e-05	4.62456
CRISPLD2	1.135	7.52577	5.03696	1.88497e-06	2.37425e-05	4.60351
F2RL2	1.36734	6.8001	5.0368	1.88628e-06	2.37458e-05	4.60285
ADRBK2	0.853631	6.72929	5.03661	1.88784e-06	2.37522e-05	4.60206
AIFM3	-0.908324	7.63727	-5.03563	1.89565e-06	2.38373e-05	4.59811
WIPF1	1.18194	9.10409	5.03468	1.90331e-06	2.39204e-05	4.59425
OLFM4	1.92571	12.5632	5.03381	1.91027e-06	2.39946e-05	4.59075
SPARCL1	1.57092	8.95356	5.0319	1.92579e-06	2.41628e-05	4.58301
XKR9	0.854149	5.22751	5.02997	1.94164e-06	2.4308e-05	4.57516
DAO	-0.670197	5.31272	-5.02908	1.94897e-06	2.43686e-05	4.57156
SLC9A2	-1.53497	9.05365	-5.02899	1.9497e-06	2.43686e-05	4.5712
REL	0.580955	8.89687	5.02732	1.96352e-06	2.45271e-05	4.56444
SNORA7B	0.926691	9.61322	5.02701	1.96611e-06	2.45271e-05	4.56318
SNORD50A	0.939357	8.22998	5.02694	1.9667e-06	2.45271e-05	4.56289
SYT11	0.999578	6.68655	5.02036	2.02218e-06	2.51637e-05	4.53627
OVOL2	-0.596156	7.34851	-5.02001	2.02513e-06	2.51866e-05	4.53488
ALDH6A1	-0.60421	7.11663	-5.01726	2.04878e-06	2.54389e-05	4.52377
COX5B	-0.592786	10.4301	-5.01538	2.06518e-06	2.55801e-05	4.51614
NBEAL1	-0.724352	8.30447	-5.01276	2.08813e-06	2.58287e-05	4.50557
RGS5	1.83636	8.52522	5.01205	2.09438e-06	2.58778e-05	4.5027
STRBP	-0.614758	7.8395	-5.01107	2.10312e-06	2.59717e-05	4.49872
PIP5K1B	-0.854674	8.39312	-5.01066	2.10674e-06	2.60022e-05	4.49708
LYPD6B	0.794695	7.35873	5.01051	2.10808e-06	2.60046e-05	4.49647
ADH1A	-1.23289	7.14511	-5.00764	2.13378e-06	2.63074e-05	4.48487
TMTC1	1.14892	6.76503	5.00699	2.13961e-06	2.63649e-05	4.48227
ANPEP	-1.95956	10.1642	-5.00635	2.14539e-06	2.64219e-05	4.47968
ETS1	0.948333	8.81475	5.00588	2.1497e-06	2.64319e-05	4.47776
MT2P1	-0.738235	11.7292	-5.00466	2.16079e-06	2.65538e-05	4.47284
SEMA6A	-1.218	8.88729	-5.00311	2.17496e-06	2.66847e-05	4.46659
NDUFB5	-0.596525	9.28798	-4.99951	2.2082e-06	2.7034e-05	4.45208
PXDC1	0.87288	7.39759	4.99848	2.21786e-06	2.71377e-05	4.4479
CALCRL	1.67697	7.20214	4.99774	2.22476e-06	2.71929e-05	4.44493
GIMAP6	0.660106	7.09048	4.99761	2.22596e-06	2.71929e-05	4.44441
ABCC1	0.725734	8.74673	4.99567	2.24428e-06	2.73725e-05	4.43657
IQSEC1	0.679639	8.11599	4.99216	2.27775e-06	2.7736e-05	4.42241
ZFP36	0.868217	9.92784	4.98891	2.30914e-06	2.80411e-05	4.40932
FLT1	1.28109	7.246	4.98867	2.31145e-06	2.80411e-05	4.40837
STRIP2	1.40284	6.67934	4.98602	2.3374e-06	2.83227e-05	4.39768
PRO2012	-0.87794	7.06638	-4.98514	2.34605e-06	2.84002e-05	4.39415
DPY19L1	0.724927	8.2858	4.98283	2.36896e-06	2.86551e-05	4.38486
MMP12	2.52867	9.03141	4.98277	2.36963e-06	2.86551e-05	4.38459
PRKCDBP	0.96146	8.09327	4.97697	2.42811e-06	2.92688e-05	4.36127
CAV1	1.37132	8.55219	4.97421	2.45646e-06	2.95322e-05	4.35017
EGR2	0.638217	7.34677	4.97223	2.47704e-06	2.9748e-05	4.34219
PLCE1	-1.19215	9.19692	-4.97142	2.48549e-06	2.98338e-05	4.33893
CXCL11	2.21147	7.0313	4.97127	2.48708e-06	2.98371e-05	4.33832
IGHV3-7	1.18017	13.1955	4.97025	2.49776e-06	2.99475e-05	4.33423
IKBIP	0.890275	6.35594	4.97014	2.49892e-06	2.99475e-05	4.33378
MID2	0.637453	7.00467	4.96958	2.50474e-06	2.99856e-05	4.33156
MEST	-0.601786	8.26749	-4.96716	2.53033e-06	3.026e-05	4.32184
IGHV3-52	1.32143	13.266	4.96652	2.53716e-06	3.03257e-05	4.31926
BNIP3	1.25804	7.93212	4.9645	2.55883e-06	3.05526e-05	4.31113
ACOX2	-0.64692	7.05336	-4.96363	2.56816e-06	3.06479e-05	4.30765
FADS1	1.34361	7.51891	4.96338	2.57083e-06	3.06637e-05	4.30665
IGKV1D-16	1.3059	10.7284	4.96272	2.57803e-06	3.07198e-05	4.30398
CFI	1.78	6.69826	4.9627	2.57825e-06	3.07198e-05	4.3039
ID2	-0.612068	9.84169	-4.96229	2.58263e-06	3.07426e-05	4.30228
LOC642131	1.94496	9.77718	4.96221	2.58357e-06	3.07426e-05	4.30193
ZNF664-FAM101A	-0.800532	8.29423	-4.9597	2.6109e-06	3.10113e-05	4.29186
HSPG2	0.746126	9.1834	4.95941	2.61406e-06	3.10326e-05	4.29071
XK	-0.92965	8.48051	-4.95916	2.61686e-06	3.10495e-05	4.28969
BPNT1	-0.686555	8.0398	-4.95772	2.63274e-06	3.11934e-05	4.2839
RASGRF2	0.843048	6.91218	4.95478	2.66538e-06	3.15594e-05	4.27212
SPOCK2	0.751057	8.01477	4.95442	2.6694e-06	3.1574e-05	4.27068
CHI3L1	2.96672	8.78979	4.95367	2.67778e-06	3.16067e-05	4.26768
SUCLG1	-0.668699	9.27707	-4.95355	2.67912e-06	3.16067e-05	4.2672
CYP27A1	-0.887009	7.42896	-4.95272	2.68854e-06	3.17013e-05	4.26385
LOXL2	1.39137	8.36784	4.95113	2.70651e-06	3.18966e-05	4.25748
HIVEP2	0.784975	7.92742	4.95054	2.71326e-06	3.19265e-05	4.2551
SMARCA1	0.735704	6.55663	4.94825	2.73944e-06	3.21981e-05	4.24592
ATP8B2	0.816304	7.47001	4.94646	2.76006e-06	3.23264e-05	4.23875
HEBP1	-0.621231	8.19196	-4.9439	2.78977e-06	3.26239e-05	4.22851
PLA2G2A	1.29657	11.2617	4.94348	2.79467e-06	3.26501e-05	4.22684
SLC22A18AS	-0.872362	6.84093	-4.93977	2.83848e-06	3.31424e-05	4.21196
CLCN2	-1.04234	8.60469	-4.93894	2.84833e-06	3.32211e-05	4.20865
NFKB2	0.726704	8.15334	4.93879	2.8502e-06	3.32211e-05	4.20803
ZNF204P	-0.96239	5.32332	-4.93871	2.85108e-06	3.32211e-05	4.20773
MEP1A	-1.91057	10.081	-4.93674	2.87475e-06	3.34798e-05	4.19983
TSHZ2	0.910017	6.25924	4.93594	2.88437e-06	3.35402e-05	4.19664
HECTD3	-0.608789	9.77782	-4.9348	2.89818e-06	3.36835e-05	4.19207
MUC1	1.08739	11.2775	4.93377	2.91072e-06	3.37947e-05	4.18794
TTPA	-0.858128	6.39847	-4.93271	2.92367e-06	3.38931e-05	4.1837
LRPPRC	-0.602245	9.32462	-4.93186	2.93405e-06	3.39787e-05	4.18031
MUT	-0.658263	8.87666	-4.92352	3.03819e-06	3.50418e-05	4.14697
OSBPL3	0.844549	7.59385	4.92269	3.04874e-06	3.51386e-05	4.14366
C1S	1.56527	9.34838	4.92019	3.08087e-06	3.5444e-05	4.13364
PTAFR	0.843974	7.46361	4.91811	3.10772e-06	3.57167e-05	4.12535
MMP1	3.24966	8.90396	4.91768	3.11329e-06	3.57575e-05	4.12364
ASAP1	1.05817	8.45906	4.91576	3.13836e-06	3.5996e-05	4.11598
SRGAP2C	0.83217	8.03767	4.91504	3.14784e-06	3.60744e-05	4.11309
ADH1C	-2.49026	9.27984	-4.915	3.14837e-06	3.60744e-05	4.11293
IGFBP7	1.17544	10.2237	4.91161	3.1932e-06	3.65512e-05	4.09942
CCL2	1.89901	8.97724	4.91072	3.20512e-06	3.66663e-05	4.09586
NDUFB9	-0.586474	9.36242	-4.90944	3.22226e-06	3.68096e-05	4.09076
RNU1-106P	0.596715	6.47228	4.90875	3.23157e-06	3.68974e-05	4.08801
CAMK2N1	-0.860653	10.8504	-4.90759	3.2473e-06	3.70398e-05	4.08337
DNAJB11	0.591341	8.80071	4.90658	3.26095e-06	3.71768e-05	4.07936
OR2A9P	-0.612449	7.60938	-4.90611	3.26737e-06	3.7194e-05	4.07748
SLC2A14	0.85144	6.80685	4.90282	3.31249e-06	3.76322e-05	4.06437
FGD5	0.689063	6.44837	4.90228	3.31997e-06	3.76794e-05	4.06222
MYCBP2	0.664946	8.31971	4.90152	3.33049e-06	3.778e-05	4.0592
IGHV3-43	1.20486	12.7244	4.89981	3.35431e-06	3.80312e-05	4.05239
ATP11A	0.779844	7.58113	4.89806	3.37894e-06	3.82722e-05	4.0454
EHD3	0.850654	7.31552	4.89641	3.40229e-06	3.84599e-05	4.03882
TK1	0.674031	8.61389	4.89339	3.4454e-06	3.89085e-05	4.02679
FADS2	1.60625	8.52576	4.89222	3.46224e-06	3.90598e-05	4.02213
CTGF	0.901272	9.37241	4.8886	3.51478e-06	3.96133e-05	4.00774
LDHD	-1.02152	8.13694	-4.88846	3.51677e-06	3.9616e-05	4.0072
EFNA5	-0.781035	7.33391	-4.88757	3.52995e-06	3.97448e-05	4.00363
S1PR1	0.907279	6.12145	4.88484	3.57017e-06	4.00586e-05	3.9928
ORAI2	1.0725	7.88496	4.88212	3.61093e-06	4.0476e-05	3.98196
ADD3	-0.638323	8.99428	-4.88066	3.63288e-06	4.06679e-05	3.97617
ADAM9	0.752521	10.4668	4.8805	3.63531e-06	4.06689e-05	3.97553
SLC1A1	-1.05625	8.29779	-4.87922	3.65473e-06	4.08459e-05	3.97045
SPIRE2	-0.630637	8.35284	-4.87799	3.6734e-06	4.10142e-05	3.96558
THY1	1.43414	8.01434	4.87732	3.68376e-06	4.11096e-05	3.96289
AMT	-0.631874	7.33837	-4.87704	3.688e-06	4.11368e-05	3.96179
SRGN	1.60634	9.14685	4.87602	3.70371e-06	4.12715e-05	3.95773
EXPH5	-1.70318	7.74197	-4.87555	3.71093e-06	4.13316e-05	3.95587
ALPI	-0.65943	7.85887	-4.86948	3.80576e-06	4.22428e-05	3.93177
DENND5A	1.14899	7.78087	4.86447	3.88572e-06	4.30252e-05	3.91191
PAQR8	-0.731382	9.28447	-4.86194	3.92667e-06	4.34363e-05	3.9019
CAV2	0.974545	7.53629	4.8612	3.93887e-06	4.355e-05	3.89894
CTSK	1.61204	8.887	4.86067	3.94758e-06	4.36251e-05	3.89683
IGKC	1.55633	11.3648	4.85883	3.9778e-06	4.38949e-05	3.88955
GBAS	-0.686578	9.09965	-4.85853	3.98266e-06	4.39149e-05	3.88838
FSCN1	0.61251	8.4183	4.85848	3.98347e-06	4.39149e-05	3.88818
TMEM55A	0.836371	6.63079	4.85819	3.98826e-06	4.39463e-05	3.88704
TSC22D3	0.888732	8.34464	4.85693	4.00928e-06	4.41244e-05	3.88202
ITPR1	0.696905	6.86666	4.85592	4.02615e-06	4.4235e-05	3.87801
CD69	1.34538	6.87956	4.85245	4.08442e-06	4.47022e-05	3.86429
ANGPTL2	1.4365	8.21518	4.85167	4.09773e-06	4.48047e-05	3.86118
MRPS36	-0.643409	7.04767	-4.84789	4.1624e-06	4.54244e-05	3.84623
SERPINB9	1.4279	8.72181	4.84632	4.18953e-06	4.56765e-05	3.84003
PDPN	1.08881	7.15895	4.84416	4.22712e-06	4.60422e-05	3.8315
TNIK	-0.593332	7.99543	-4.84313	4.24529e-06	4.61958e-05	3.8274
APOL2	0.76836	7.21709	4.84233	4.25932e-06	4.63262e-05	3.82425
IGKV1-13	1.43432	9.72178	4.84034	4.29461e-06	4.66877e-05	3.81638
IFI44	1.08038	5.90215	4.83782	4.33959e-06	4.71541e-05	3.80643
CARD11	0.766404	7.09364	4.83577	4.37656e-06	4.75103e-05	3.79833
SRM	0.618246	9.63172	4.83477	4.3948e-06	4.76856e-05	3.79436
STPG1	-0.699415	7.03301	-4.83305	4.4261e-06	4.79564e-05	3.78759
SRGAP2	0.680113	7.61088	4.83279	4.43098e-06	4.79636e-05	3.78653
ANXA6	1.09937	9.61135	4.8316	4.45282e-06	4.81541e-05	3.78184
RRM2	0.960887	7.42499	4.83127	4.45889e-06	4.81738e-05	3.78054
PLCB1	0.828586	6.90221	4.83094	4.46493e-06	4.82161e-05	3.77925
ELL3	-0.583308	6.60501	-4.82959	4.48984e-06	4.84391e-05	3.77394
HPGD	-1.32572	10.1124	-4.82695	4.53918e-06	4.89017e-05	3.7635
BST2	1.05934	7.16962	4.82666	4.54459e-06	4.89367e-05	3.76237
COL4A2	1.15867	8.45248	4.82481	4.57948e-06	4.92175e-05	3.75507
KDR	1.36304	7.77802	4.82194	4.63419e-06	4.97366e-05	3.74373
SAMD9L	1.17578	9.69072	4.82174	4.63807e-06	4.97547e-05	3.74293
ZNF675	-0.802514	6.98611	-4.82126	4.64711e-06	4.98187e-05	3.74107
CD5	0.704628	7.552	4.81751	4.71964e-06	5.04391e-05	3.72629
ODC1	0.893194	10.3267	4.81591	4.75109e-06	5.07274e-05	3.71995
TSPAN5	0.66004	6.9206	4.81499	4.76903e-06	5.08712e-05	3.71636
PALMD	0.961444	6.40296	4.81311	4.80623e-06	5.11874e-05	3.70894
NDUFB3	-0.625643	7.1801	-4.81244	4.81949e-06	5.12638e-05	3.70631
NR1H4	-1.24333	4.96732	-4.81167	4.83478e-06	5.13554e-05	3.70329
PPP1R36	-0.695216	6.26234	-4.81134	4.84149e-06	5.13786e-05	3.70197
SPNS2	0.920931	8.9902	4.81047	4.8589e-06	5.15152e-05	3.69854
LOC344887	-1.09778	7.2066	-4.80685	4.93202e-06	5.2193e-05	3.68429
ADHFE1	-0.621062	5.82591	-4.80196	5.03242e-06	5.31564e-05	3.66506
MYEOV	0.943334	7.89562	4.79917	5.09048e-06	5.37447e-05	3.65411
P2RY8	1.0886	6.87097	4.79855	5.10357e-06	5.38578e-05	3.65166
PRKACB	-0.713418	9.30633	-4.79783	5.1187e-06	5.39924e-05	3.64884
THRA	-0.596634	8.52246	-4.79651	5.14675e-06	5.41876e-05	3.64362
HLA-DMB	0.952846	9.19365	4.79161	5.25159e-06	5.52227e-05	3.62438
ICOS	1.14216	5.87163	4.79127	5.25888e-06	5.52401e-05	3.62306
ALPL	1.55756	7.80794	4.79072	5.27079e-06	5.53397e-05	3.6209
RBMS1	1.02197	7.69368	4.79021	5.28189e-06	5.5405e-05	3.61889
TRIM16L	0.649771	8.52252	4.79003	5.28586e-06	5.5421e-05	3.61818
RFTN1	0.959448	7.69146	4.7894	5.29961e-06	5.55156e-05	3.6157
PYROXD1	-0.665545	8.57155	-4.78917	5.30448e-06	5.55156e-05	3.61482
SCARA3	0.605668	7.6895	4.78917	5.30467e-06	5.55156e-05	3.61479
RNY4P19	0.617129	6.84412	4.78517	5.39266e-06	5.63846e-05	3.59909
RAB23	0.696388	6.689	4.78381	5.42272e-06	5.66207e-05	3.59379
SORD	0.771328	8.89085	4.78146	5.47536e-06	5.71178e-05	3.58457
IGKV2D-28	1.39953	12.6024	4.77743	5.56694e-06	5.79135e-05	3.56875
PXDN	1.43371	8.56224	4.77023	5.73401e-06	5.93525e-05	3.54055
CMBL	-1.11991	9.24466	-4.76615	5.83076e-06	6.02168e-05	3.52459
MPC1	-0.676821	9.77571	-4.76573	5.84088e-06	6.02938e-05	3.52293
IGHV3OR16-8	1.29788	9.75125	4.76497	5.85914e-06	6.04274e-05	3.51996
HLA-DQB2	0.625497	7.99801	4.76437	5.87359e-06	6.05215e-05	3.51761
NNMT	1.23206	8.21564	4.76234	5.92256e-06	6.09492e-05	3.50969
FERMT2	1.10657	7.2525	4.76232	5.92315e-06	6.09492e-05	3.50959
PTPRC	1.57414	8.48345	4.75904	6.00328e-06	6.16898e-05	3.49678
EHD2	0.695211	8.33298	4.75699	6.05398e-06	6.21265e-05	3.48876
ARHGAP31	0.74301	7.73559	4.75589	6.08143e-06	6.23799e-05	3.48445
CSF2RB	1.24974	8.26386	4.75507	6.10191e-06	6.25618e-05	3.48124
IMPA2	-0.663852	7.36784	-4.7544	6.1187e-06	6.27056e-05	3.47862
EPB41L4A	0.613349	7.70699	4.75206	6.17754e-06	6.31945e-05	3.46949
CADM1	0.700412	6.90025	4.74778	6.28684e-06	6.4197e-05	3.45277
IGKV2D-40	3.23464	7.16631	4.7411	6.46102e-06	6.57686e-05	3.42671
CD2	0.728572	7.05852	4.73765	6.55297e-06	6.64959e-05	3.41324
FRY	0.671691	6.98346	4.73394	6.65309e-06	6.73614e-05	3.39879
ATP2B4	0.713924	8.32341	4.73152	6.71905e-06	6.79687e-05	3.38938
MAOA	-1.33121	8.72457	-4.72818	6.8114e-06	6.87497e-05	3.37637
TRIM16	0.655377	8.75901	4.72804	6.81545e-06	6.876e-05	3.3758
FAM65A	0.68479	7.51059	4.72504	6.89928e-06	6.94207e-05	3.36415
IL23R	-0.67213	5.41985	-4.72318	6.95201e-06	6.98894e-05	3.35689
ART3	0.900282	5.35783	4.71976	7.04971e-06	7.07463e-05	3.34359
COL6A2	0.727001	9.23443	4.71768	7.1096e-06	7.12844e-05	3.33553
ATP9A	-0.782414	8.93691	-4.71608	7.15613e-06	7.16244e-05	3.32931
NFE2L3	0.585629	7.95495	4.71479	7.194e-06	7.19717e-05	3.32428
IFI30	1.0809	10.0534	4.71349	7.23234e-06	7.22916e-05	3.31921
NR4A1	1.16812	8.14967	4.71083	7.31112e-06	7.28866e-05	3.30889
EDNRA	1.64219	7.29379	4.71024	7.32862e-06	7.30289e-05	3.30661
RN7SKP103	-0.59488	5.92037	-4.70768	7.40534e-06	7.36964e-05	3.29669
PTGR2	-0.582515	6.70987	-4.70748	7.41138e-06	7.37242e-05	3.29591
CEP70	-0.690278	6.54649	-4.70595	7.4579e-06	7.4122e-05	3.28995
SLC39A6	0.671862	7.61624	4.70571	7.46514e-06	7.4144e-05	3.28902
KLF7	1.0078	8.02777	4.70566	7.46663e-06	7.4144e-05	3.28883
GPR116	1.32611	7.0622	4.70523	7.47962e-06	7.42405e-05	3.28718
FMNL3	0.873823	7.34222	4.70498	7.48742e-06	7.42735e-05	3.28618
HLA-DRB5	1.68006	8.45842	4.70491	7.48949e-06	7.42735e-05	3.28592
PDE5A	-0.742734	7.7093	-4.70327	7.53975e-06	7.4724e-05	3.27955
OTC	-0.888918	5.07608	-4.70278	7.55467e-06	7.48219e-05	3.27766
E2F5	0.666882	7.87573	4.70085	7.6142e-06	7.52801e-05	3.27018
DDC	-0.937878	7.90699	-4.7007	7.61896e-06	7.52944e-05	3.26959
LGALSL	-0.620615	9.44976	-4.69952	7.65581e-06	7.56257e-05	3.26499
EVI2B	1.34886	9.52763	4.69805	7.70153e-06	7.60301e-05	3.25932
RNF125	-0.783522	7.86943	-4.69482	7.80361e-06	7.68859e-05	3.24677
MMP9	1.83067	8.57664	4.69481	7.8037e-06	7.68859e-05	3.24676
CARD8	0.718217	7.50136	4.69279	7.86809e-06	7.74867e-05	3.23893
MUC5B	1.28541	10.7909	4.68981	7.96415e-06	7.8263e-05	3.22737
SNORA24	0.915662	10.3633	4.68913	7.98603e-06	7.84441e-05	3.22476
PMFBP1	-0.648433	5.75706	-4.68762	8.03532e-06	7.886e-05	3.2189
FGFR1	0.58676	7.16716	4.68691	8.05836e-06	7.90179e-05	3.21617
RBP2	-0.640819	5.80563	-4.68573	8.09731e-06	7.93313e-05	3.21157
TFPI	1.30384	6.67974	4.68539	8.10824e-06	7.94041e-05	3.21029
LRRC32	0.713321	7.73171	4.68488	8.12526e-06	7.95365e-05	3.20829
FAR2	-0.626799	8.94594	-4.68102	8.25373e-06	8.0551e-05	3.19335
RN7SL473P	1.00604	7.65579	4.67673	8.39859e-06	8.1754e-05	3.17677
MPC2	-0.591873	9.73428	-4.67474	8.4666e-06	8.23348e-05	3.16909
IGHV1OR15-1	2.56498	9.15406	4.67462	8.47088e-06	8.23348e-05	3.16861
GULP1	-0.856796	6.35922	-4.67441	8.47803e-06	8.23507e-05	3.16781
LAMA4	1.07917	8.02365	4.67243	8.54653e-06	8.29806e-05	3.16014
EML1	0.827686	6.8862	4.67189	8.56523e-06	8.31267e-05	3.15806
LAX1	1.57619	7.57213	4.67048	8.61416e-06	8.34945e-05	3.15264
EFEMP2	0.690725	7.60382	4.67031	8.62004e-06	8.35158e-05	3.15199
SIK1	1.09891	8.00897	4.66944	8.65076e-06	8.37778e-05	3.1486
ZNF493	-0.604946	6.51388	-4.66836	8.6886e-06	8.40725e-05	3.14444
C6orf222	-0.749273	7.10758	-4.66372	8.85362e-06	8.54495e-05	3.12652
SLC6A9	-0.61664	8.27474	-4.66166	8.92781e-06	8.5993e-05	3.11858
FBXO34	-0.6316	9.05238	-4.65945	9.00806e-06	8.66835e-05	3.11005
HOOK1	-0.949471	7.95934	-4.65787	9.06577e-06	8.7165e-05	3.10397
CEP135	0.609697	6.516	4.65721	9.09017e-06	8.73626e-05	3.10141
XAF1	0.991196	8.50462	4.65695	9.09948e-06	8.7415e-05	3.10044
MSC	0.959628	6.95397	4.65592	9.13762e-06	8.77072e-05	3.09646
ACADSB	-0.838224	7.35502	-4.65543	9.15579e-06	8.78075e-05	3.09456
BDH1	-1.01332	8.17385	-4.65523	9.16311e-06	8.78406e-05	3.0938
GIMAP2	0.60059	6.7131	4.65129	9.31029e-06	8.90634e-05	3.07863
KPNA2	0.759139	9.82284	4.65059	9.33688e-06	8.92426e-05	3.07592
PKIA	0.607289	6.11275	4.64984	9.36509e-06	8.93994e-05	3.07304
GIMAP8	0.628207	6.69864	4.64912	9.39259e-06	8.96243e-05	3.07025
SMAP2	0.832744	9.26558	4.64843	9.41865e-06	8.98351e-05	3.06761
CXCL16	0.609289	8.664	4.6464	9.49644e-06	9.0501e-05	3.05978
HLA-DQA1	1.31399	11.3898	4.64241	9.65056e-06	9.18119e-05	3.04445
RNU5A-8P	1.23899	6.12798	4.64192	9.66963e-06	9.19202e-05	3.04258
SLC43A3	1.09653	8.41503	4.64086	9.71147e-06	9.22793e-05	3.03846
TNFAIP8	0.732012	7.18798	4.63935	9.77069e-06	9.27256e-05	3.03268
CAMK2D	-0.605678	9.03567	-4.63814	9.81862e-06	9.30798e-05	3.02802
CITED2	-0.598143	9.55085	-4.63763	9.83888e-06	9.32169e-05	3.02606
ACSL4	1.79664	7.93853	4.63687	9.86898e-06	9.34507e-05	3.02315
FKBP10	1.08272	8.01047	4.63633	9.8906e-06	9.35898e-05	3.02107
RAMP2	0.677154	7.20933	4.63604	9.90198e-06	9.36252e-05	3.01997
ARHGEF9	-0.775595	8.12734	-4.63565	9.91784e-06	9.36914e-05	3.01845
LSAMP	0.789951	6.81505	4.63495	9.94587e-06	9.38391e-05	3.01576
SLCO3A1	0.753878	8.39531	4.63279	1.00329e-05	9.45424e-05	3.00747
RHOH	1.37066	7.6325	4.63159	1.00817e-05	9.48582e-05	3.00285
C11orf54	-0.685209	8.75355	-4.63155	1.00831e-05	9.48582e-05	3.00271
NT5DC2	0.752284	8.36843	4.63134	1.00916e-05	9.48824e-05	3.00191
PCDH17	0.934238	7.31893	4.62743	1.02521e-05	9.61297e-05	2.98689
IGKV1D-43	1.77182	11.2992	4.6262	1.0303e-05	9.65273e-05	2.98218
NAALADL2	-0.920697	6.84763	-4.62561	1.03279e-05	9.67199e-05	2.97989
LMCD1	0.614328	7.65024	4.6253	1.03407e-05	9.67998e-05	2.97871
SLC7A2	0.769292	6.68646	4.62324	1.04268e-05	9.74458e-05	2.97081
PCK2	-0.747647	8.63545	-4.62255	1.04559e-05	9.7677e-05	2.96816
MAP4K4	0.738756	7.85436	4.61779	1.06584e-05	9.93622e-05	2.9499
MBNL3	-0.591779	8.75543	-4.61149	1.0932e-05	0.000101706	2.92579
MMRN2	0.631019	6.8435	4.60859	1.10603e-05	0.000102689	2.91469
CD79A	1.83316	9.28599	4.60392	1.127e-05	0.000104509	2.89681
CENPV	-0.75255	8.17156	-4.60326	1.12999e-05	0.0001047	2.89429
GPR137B	0.738193	8.70728	4.60143	1.13834e-05	0.000105249	2.88728
LOC102724453	1.40753	12.3427	4.60064	1.14195e-05	0.000105507	2.88427
EBF1	0.969904	7.16651	4.59706	1.15851e-05	0.000106733	2.87058
KLHL5	1.43741	6.94846	4.59686	1.15943e-05	0.000106775	2.86982
RN7SKP35	-0.895412	5.5935	-4.5967	1.1602e-05	0.000106803	2.86919
HCLS1	1.07702	7.57018	4.59579	1.16443e-05	0.000107083	2.86573
FLI1	1.04334	7.38615	4.59574	1.16466e-05	0.000107083	2.86554
DNAJB9	0.823075	8.18538	4.59447	1.17061e-05	0.000107586	2.86069
ITGB2	1.13361	8.47522	4.59313	1.17693e-05	0.000108079	2.85557
SLC46A1	-0.703316	7.78363	-4.59136	1.18535e-05	0.000108721	2.84879
COBL	-0.807614	7.60438	-4.58904	1.19641e-05	0.000109558	2.83995
NID2	0.844939	7.79599	4.58216	1.2299e-05	0.000112308	2.81369
TMEM109	0.592535	9.51174	4.57979	1.24161e-05	0.000113241	2.80468
GIPC2	-0.937316	8.33751	-4.57779	1.2516e-05	0.000114106	2.79706
SGIP1	0.829193	6.20798	4.57591	1.2611e-05	0.000114926	2.78986
PREX1	0.958225	8.04928	4.57428	1.26933e-05	0.000115584	2.78368
LRRC8C	0.675087	7.1274	4.57171	1.28245e-05	0.000116638	2.7739
SPTLC3	-0.765567	6.97383	-4.56758	1.30387e-05	0.000118396	2.75815
CD226	0.796831	6.01689	4.56689	1.30744e-05	0.000118673	2.75555
IGHV1OR15-9	0.688193	6.91831	4.56307	1.32761e-05	0.000120407	2.74099
KIF16B	-0.643264	8.10372	-4.55953	1.34651e-05	0.000121976	2.72755
HIST1H4C	0.648776	9.82933	4.55901	1.34932e-05	0.000122084	2.72557
RNA5SP260	-0.666493	7.5865	-4.55665	1.36208e-05	0.000122945	2.71662
ADM	1.0413	9.60022	4.55617	1.36471e-05	0.000123084	2.71479
EDN3	-1.03113	8.52896	-4.55484	1.37196e-05	0.000123688	2.70975
OAS3	0.76618	8.07121	4.55353	1.3792e-05	0.000124194	2.70474
PDGFRB	1.25486	8.0065	4.55298	1.38219e-05	0.000124413	2.70269
RN7SL386P	-0.608701	4.91572	-4.55029	1.39715e-05	0.00012566	2.69245
BDKRB1	-0.680104	7.74363	-4.54954	1.40134e-05	0.000125938	2.6896
KCNN3	0.758796	7.13528	4.54904	1.40413e-05	0.000126038	2.68772
SPATS2	0.641219	8.1736	4.54726	1.41415e-05	0.000126788	2.68095
CTLA4	0.91474	6.1042	4.54716	1.41471e-05	0.000126788	2.68058
SLC52A3	-0.641178	8.06174	-4.54449	1.42982e-05	0.000127991	2.67048
DYSF	1.31164	6.98034	4.54421	1.43144e-05	0.000128085	2.6694
UNC5CL	0.95105	6.64935	4.54321	1.43718e-05	0.000128548	2.6656
HTRA1	0.630923	8.46576	4.5426	1.44065e-05	0.000128808	2.66331
SLC16A7	0.620393	6.83641	4.54071	1.45154e-05	0.000129628	2.65615
ZNF814	-0.701549	6.53771	-4.53918	1.46044e-05	0.00013027	2.65033
NXPE3	1.03548	6.66396	4.53792	1.46781e-05	0.000130876	2.64555
CLEC1A	0.760957	5.70396	4.53704	1.47295e-05	0.00013118	2.64223
SNORA54	0.939577	7.8735	4.53521	1.48372e-05	0.000131942	2.63531
MX2	1.17782	7.17142	4.53459	1.48739e-05	0.000132206	2.63296
MS4A8	-1.27694	7.22305	-4.53412	1.4902e-05	0.000132352	2.63116
WWTR1	0.885727	7.79094	4.53335	1.49479e-05	0.000132656	2.62824
SACS	0.86828	6.21814	4.53199	1.50287e-05	0.000133269	2.62312
IL10RA	1.04327	8.08735	4.5302	1.51365e-05	0.000134173	2.61632
CCDC3	1.29	7.7565	4.52874	1.52248e-05	0.000134797	2.6108
ATM	0.878739	8.11984	4.52838	1.52463e-05	0.000134935	2.60945
FBN1	1.4518	7.65394	4.52733	1.53105e-05	0.000135398	2.60546
SNX10	0.998121	7.178	4.52695	1.53337e-05	0.00013555	2.60403
AKR1B10	-1.42822	8.55049	-4.52438	1.54912e-05	0.000136889	2.59431
CTDSPL	-0.739745	9.01049	-4.5193	1.58073e-05	0.000139249	2.57512
RNU6-701P	-0.603087	5.05559	-4.51759	1.59151e-05	0.000140144	2.56866
SCP2	-0.70637	8.83062	-4.51652	1.59826e-05	0.000140684	2.56464
CA2	-1.36245	10.3467	-4.5164	1.59907e-05	0.0001407	2.56416
TNFSF8	0.938916	7.37497	4.51605	1.60126e-05	0.000140839	2.56286
SLC39A5	-1.3845	9.13519	-4.51534	1.60582e-05	0.000141131	2.56016
TTC28	0.602872	6.71601	4.51365	1.61659e-05	0.000141912	2.55381
CLEC14A	0.719942	6.952	4.51059	1.63639e-05	0.000143429	2.54224
ZNF124	-0.772951	6.83382	-4.5097	1.64218e-05	0.000143881	2.53888
PON3	-0.838657	6.60636	-4.50853	1.64981e-05	0.000144419	2.53448
GM2A	0.675456	9.42463	4.50837	1.65086e-05	0.000144419	2.53387
NR5A2	-0.778399	9.25557	-4.50768	1.65542e-05	0.000144706	2.53125
IGKV1D-42	1.10039	13.0205	4.5065	1.66315e-05	0.00014527	2.52683
TIE1	0.685647	6.89855	4.50469	1.67518e-05	0.000146152	2.51998
JAZF1	0.584135	6.90665	4.50394	1.68015e-05	0.000146529	2.51717
RNF24	0.658551	7.79443	4.5017	1.69518e-05	0.000147613	2.50871
BCL6B	0.599144	7.1864	4.50113	1.69897e-05	0.00014783	2.50658
REG1A	3.56902	8.95936	4.50044	1.70368e-05	0.000148069	2.50396
CYTH4	1.12994	7.96057	4.49968	1.70878e-05	0.000148456	2.50112
FCGRT	-0.619053	9.26847	-4.4992	1.71202e-05	0.000148681	2.49932
LAPTM5	1.26827	10.1294	4.49307	1.75414e-05	0.000151816	2.47624
SAA2-SAA4	1.21291	5.86964	4.49265	1.75705e-05	0.00015201	2.47466
CLDN2	0.582361	6.56384	4.49173	1.76346e-05	0.000152449	2.4712
CPNE2	-0.64867	9.67364	-4.49047	1.77228e-05	0.000153094	2.46646
ZNF43	-0.710489	6.31952	-4.48829	1.7877e-05	0.00015425	2.45824
ARHGAP25	0.927484	7.01492	4.48786	1.79071e-05	0.000154452	2.45663
ABCA13	0.640934	5.96025	4.48715	1.79579e-05	0.000154783	2.45395
TIMP3	0.868662	7.73365	4.48713	1.79592e-05	0.000154783	2.45388
GLCCI1	1.04507	8.56475	4.48111	1.83922e-05	0.000158154	2.43126
RAB34	0.633665	7.03552	4.48071	1.8421e-05	0.000158343	2.42977
TMEM144	-0.912992	7.64546	-4.47859	1.85761e-05	0.00015932	2.42181
NOS2P3	0.673972	8.80104	4.47858	1.85768e-05	0.00015932	2.42177
GPR126	1.44723	8.91789	4.47753	1.8654e-05	0.000159801	2.41783
PARP14	0.868297	9.28879	4.47673	1.87129e-05	0.000160185	2.41484
ITGAL	0.924491	7.67913	4.47559	1.87978e-05	0.000160729	2.41054
EMP3	0.963368	8.44983	4.4748	1.88565e-05	0.000161131	2.40758
LGALS1	0.857558	10.1377	4.47292	1.89973e-05	0.000161862	2.40052
PLEK	2.07848	7.66146	4.4729	1.89986e-05	0.000161862	2.40045
SLC16A4	1.1168	6.50656	4.47156	1.90995e-05	0.000162575	2.39542
FMNL1	0.845707	7.90161	4.47136	1.91145e-05	0.000162621	2.39468
MZB1	1.41201	8.62979	4.46873	1.93142e-05	0.000164095	2.38481
LRRC75A	-0.8532	8.89269	-4.46828	1.93487e-05	0.000164326	2.38312
PTK6	-0.620676	8.97512	-4.46799	1.93702e-05	0.000164448	2.38206
MYCT1	0.821559	6.18553	4.4666	1.94771e-05	0.000165191	2.37684
COL5A1	0.62635	7.65737	4.46657	1.94796e-05	0.000165191	2.37671
SNX2	-0.674523	9.47609	-4.46601	1.95224e-05	0.000165431	2.37463
IRAK2	0.810718	7.27026	4.46476	1.96194e-05	0.000166129	2.36992
MT-TL2	-1.02046	10.5895	-4.46183	1.98472e-05	0.000167682	2.35897
MYBL2	0.728091	8.19741	4.4592	2.00542e-05	0.000169175	2.34912
GMPR	0.847661	7.49001	4.45911	2.00612e-05	0.000169175	2.34879
SLC1A4	0.744522	8.15235	4.45778	2.01669e-05	0.000170004	2.3438
TP53INP2	-0.63376	9.18928	-4.45305	2.0546e-05	0.000172943	2.32612
RAB31	1.29363	9.69228	4.45246	2.0594e-05	0.000173177	2.32391
ERO1LB	0.730133	6.05366	4.4505	2.07535e-05	0.000174371	2.31659
NR4A3	1.04272	6.77066	4.4505	2.0754e-05	0.000174371	2.31656
MS4A12	-2.41739	10.3327	-4.44751	2.09999e-05	0.000176241	2.30538
FCGR3A	1.41728	7.22088	4.44713	2.10308e-05	0.000176435	2.30399
HNF4G	-1.09165	8.47993	-4.4466	2.10751e-05	0.000176741	2.30199
BCL2L14	-0.580461	7.22563	-4.44491	2.1216e-05	0.000177857	2.29567
COL3A1	1.30553	9.73532	4.44362	2.13237e-05	0.000178694	2.29086
AQP9	2.66624	7.43348	4.44304	2.13725e-05	0.000178971	2.28869
PLSCR4	-0.581349	7.81189	-4.44124	2.15241e-05	0.000180108	2.28198
IGLV6-57	1.82956	8.76594	4.44064	2.15753e-05	0.000180469	2.27973
MMP2	1.57856	9.38296	4.43634	2.19432e-05	0.000182884	2.26369
NUP210	0.701229	8.17739	4.43632	2.19444e-05	0.000182884	2.26363
IGKV1OR2-108	0.99368	7.55036	4.43554	2.20123e-05	0.000183129	2.2607
GZMB	0.723826	6.97422	4.43551	2.20142e-05	0.000183129	2.26062
GPX7	0.948358	8.15257	4.43353	2.21865e-05	0.00018436	2.25322
TIPARP	0.591704	8.98659	4.43319	2.22166e-05	0.000184542	2.25194
CPEB4	0.711052	8.58069	4.42948	2.25421e-05	0.000186973	2.23813
STX2	0.755628	7.04186	4.42809	2.26662e-05	0.000187594	2.23293
AKR7L	-0.584795	6.82192	-4.42513	2.2931e-05	0.000189506	2.22191
VIPR1	-1.30874	8.70116	-4.42475	2.29646e-05	0.000189715	2.22052
RECQL	0.712716	6.87225	4.42428	2.30075e-05	0.00019	2.21875
ELMO1	1.10367	8.16593	4.42114	2.32922e-05	0.000192142	2.20708
BCL6	1.20249	7.58374	4.41792	2.35881e-05	0.000194159	2.19511
QKI	0.862424	7.12514	4.41746	2.36315e-05	0.000194446	2.19336
ZSWIM5	-0.70799	8.03458	-4.4172	2.36551e-05	0.00019457	2.19242
EMR2	1.39271	7.7536	4.41698	2.36756e-05	0.000194668	2.19159
IL1A	1.84157	6.54079	4.41623	2.37451e-05	0.000194957	2.18881
TRPM4	-0.707162	8.82475	-4.41482	2.38768e-05	0.000195968	2.18357
COL12A1	1.85979	8.26002	4.41393	2.396e-05	0.000196508	2.18027
LRG1	0.601383	8.07035	4.41357	2.39941e-05	0.000196623	2.17892
RASGRP1	0.964348	7.23333	4.41258	2.40878e-05	0.000197272	2.17522
RN7SL769P	0.614184	9.08383	4.41232	2.41125e-05	0.000197402	2.17425
GYPC	0.750089	7.60758	4.41071	2.42645e-05	0.000198432	2.16829
CHAC1	0.867779	7.52725	4.40857	2.44692e-05	0.000199638	2.16032
PRRX1	1.45803	7.31627	4.40852	2.44735e-05	0.000199638	2.16016
PTP4A1P7	-0.608715	8.07953	-4.40781	2.45414e-05	0.00020012	2.15753
PARP9	0.993972	8.20124	4.40658	2.46597e-05	0.000200941	2.15297
MIR200C	-0.795756	6.71509	-4.40546	2.47686e-05	0.000201756	2.14879
SKIL	0.675165	8.33088	4.40357	2.49521e-05	0.000203032	2.14179
TFF1	1.38337	10.5277	4.40221	2.50857e-05	0.000203973	2.13673
FGF2	0.945681	7.78442	4.39797	2.55049e-05	0.000206789	2.12101
AEBP1	0.770544	8.52713	4.39781	2.55209e-05	0.000206804	2.12041
PBX1	-0.649687	8.5053	-4.39585	2.57176e-05	0.000207994	2.11314
MIR192	-1.13898	7.91847	-4.39412	2.58913e-05	0.000209105	2.10675
S100B	0.661166	6.13108	4.39222	2.60848e-05	0.000210514	2.09969
AHNAK2	0.868676	6.64052	4.39138	2.61705e-05	0.00021113	2.09658
TRPS1	1.02756	6.80603	4.39074	2.62361e-05	0.000211584	2.09421
TSPAN11	0.836757	7.71845	4.38845	2.6472e-05	0.00021326	2.08572
REG3A	3.13291	7.7021	4.38822	2.64959e-05	0.000213376	2.08487
MRC2	0.694144	7.91198	4.38576	2.67512e-05	0.000215127	2.07578
TPK1	0.905385	7.14815	4.38414	2.69203e-05	0.000216147	2.0698
BTNL8	-1.27362	8.76127	-4.38068	2.72865e-05	0.000218742	2.057
ADAMTSL1	-0.614272	6.15336	-4.38067	2.72874e-05	0.000218742	2.05696
TMEM45A	1.0976	5.87514	4.38013	2.73449e-05	0.000219049	2.05497
MR1	0.626627	7.15416	4.37915	2.74502e-05	0.000219737	2.05133
RGS1	1.37303	6.26929	4.37522	2.78735e-05	0.000222811	2.03682
SLC22A23	-0.792708	8.45829	-4.3744	2.79629e-05	0.00022329	2.03378
SECTM1	-0.840973	9.18126	-4.37362	2.80479e-05	0.000223891	2.03091
PRKCH	0.788355	8.2884	4.37016	2.8429e-05	0.000226693	2.01812
RARRES3	0.784764	8.90896	4.36992	2.84558e-05	0.000226748	2.01722
SHH	0.604842	8.26004	4.36954	2.8498e-05	0.000227004	2.01582
MFGE8	0.871413	8.61964	4.36904	2.85536e-05	0.000227315	2.01397
GAL3ST1	-0.584441	7.44859	-4.36271	2.92649e-05	0.000232461	1.99065
MFSD2A	0.808007	8.32054	4.35983	2.95948e-05	0.000234429	1.98003
THEMIS2	1.10536	7.8669	4.35952	2.96305e-05	0.000234627	1.97889
SCN9A	-0.82592	5.72489	-4.359	2.96909e-05	0.000234888	1.97696
CD80	1.07851	6.32592	4.35893	2.96993e-05	0.000234888	1.97669
LOC100508226	-0.678453	5.95008	-4.35888	2.97049e-05	0.000234888	1.97651
CSGALNACT2	0.978704	7.59079	4.35741	2.98743e-05	0.000236063	1.97112
SERPINB8	0.735684	8.45092	4.35709	2.99122e-05	0.000236198	1.96992
C1orf210	-1.04805	8.94316	-4.35668	2.99592e-05	0.000236487	1.96843
GALNT12	-1.14506	9.29821	-4.35506	3.01485e-05	0.000237675	1.96247
APCDD1	0.741033	8.15849	4.3542	3.02502e-05	0.00023837	1.95927
LGI2	0.698994	6.42557	4.3541	3.02619e-05	0.000238379	1.95891
DOCK11	1.01115	7.6321	4.35368	3.03115e-05	0.000238623	1.95736
NLRC5	0.588614	8.31842	4.35099	3.06293e-05	0.000240856	1.94747
FBXW7	0.686725	7.28728	4.34899	3.08686e-05	0.000242339	1.9401
RIMKLA	-0.686449	7.94392	-4.34885	3.08847e-05	0.00024236	1.93961
TM4SF5	-0.651076	7.80427	-4.34843	3.09356e-05	0.00024246	1.93805
HADH	-0.737936	8.98848	-4.34839	3.09401e-05	0.00024246	1.93791
CR1	1.53833	6.55905	4.34799	3.09887e-05	0.000242757	1.93642
FAM20C	0.75659	8.65184	4.34682	3.11296e-05	0.000243777	1.93212
NDRG2	-0.842068	9.45595	-4.34561	3.12764e-05	0.000244758	1.92767
GMFG	1.1324	8.06661	4.3455	3.12895e-05	0.000244776	1.92727
APOBEC3G	0.928483	6.7124	4.34456	3.14035e-05	0.000245499	1.92383
MMP10	1.74103	6.49775	4.34406	3.14651e-05	0.000245896	1.92197
THRB	-1.07406	7.17789	-4.34312	3.15798e-05	0.000246707	1.91852
GIMAP7	0.742748	7.07333	4.34073	3.18737e-05	0.00024849	1.90975
CLDN12	0.728506	10.1394	4.33838	3.21655e-05	0.000250503	1.90112
ECT2	0.717444	7.82181	4.33781	3.22372e-05	0.000250722	1.89901
PLEKHO1	0.58647	7.09785	4.33195	3.29767e-05	0.00025586	1.87752
TNFAIP2	0.933849	8.28634	4.33173	3.3006e-05	0.000255912	1.87668
PIP4K2A	0.661648	8.29463	4.33006	3.32194e-05	0.000256865	1.87058
CXCL8	2.35751	8.43987	4.32869	3.33958e-05	0.000258141	1.86556
BIRC3	1.47364	8.79162	4.32801	3.3484e-05	0.000258646	1.86307
CGN	-0.819921	8.36136	-4.32319	3.41144e-05	0.000262712	1.8454
COL6A1	0.921391	9.26512	4.32306	3.4132e-05	0.000262758	1.84491
CHN1	1.24394	6.55882	4.32246	3.42109e-05	0.000263119	1.84273
IL21R	0.67182	6.77677	4.32	3.45378e-05	0.000265433	1.83372
CD38	1.31137	7.94711	4.31775	3.48396e-05	0.000267209	1.82549
RAPGEF4	0.580485	6.33829	4.313	3.54852e-05	0.000271886	1.8081
RBMS3	0.677641	6.8233	4.311	3.57605e-05	0.000273651	1.80078
MGP	1.57003	7.40477	4.31098	3.57638e-05	0.000273651	1.8007
TFAP2C	0.715923	6.00171	4.31069	3.58039e-05	0.000273854	1.79964
SLAMF1	1.04659	6.1869	4.31061	3.58144e-05	0.000273854	1.79936
CYP3A4	-1.28153	4.93535	-4.31028	3.58603e-05	0.000274112	1.79815
PTCH2	0.698418	7.34923	4.31017	3.58755e-05	0.000274136	1.79774
VNN2	1.92093	6.54318	4.30813	3.61592e-05	0.000276211	1.79029
LAMP3	1.14741	7.64812	4.30716	3.62955e-05	0.000277159	1.78673
NFATC2	0.648534	7.88878	4.30698	3.63207e-05	0.000277258	1.78607
LRRC1	-0.720575	8.46283	-4.3068	3.63458e-05	0.000277356	1.78542
EGR3	0.755261	6.67282	4.3049	3.66125e-05	0.00027911	1.77849
FAM13A	-0.587951	7.837	-4.3022	3.69965e-05	0.000281565	1.76862
SLC4A11	0.596011	7.37392	4.3021	3.70097e-05	0.000281572	1.76828
CLMP	0.896171	7.395	4.29811	3.75849e-05	0.000285113	1.75368
SEMA4A	0.706831	7.5739	4.29808	3.75883e-05	0.000285113	1.7536
ITGA2	1.14259	9.84079	4.29455	3.81042e-05	0.000288545	1.74069
GRAMD1A	0.621839	8.26524	4.29418	3.81573e-05	0.000288754	1.73938
MYH10	0.621529	6.77388	4.29339	3.82739e-05	0.000289444	1.73649
GPCPD1	0.604898	8.47149	4.29201	3.84786e-05	0.000290702	1.73144
C5orf30	-0.888715	8.51601	-4.29087	3.86471e-05	0.000291393	1.72731
SYTL4	-0.583742	7.24075	-4.28998	3.87795e-05	0.000292197	1.72407
LCP2	1.25806	8.70832	4.28877	3.89605e-05	0.000293269	1.71966
MAGI3	-0.651674	8.20061	-4.28868	3.89741e-05	0.000293274	1.71933
CNNM4	-0.84732	9.77866	-4.28605	3.93712e-05	0.000295871	1.70974
CD200	0.695313	7.81294	4.28125	4.01049e-05	0.000300489	1.69227
KRT7	0.869722	7.64523	4.27883	4.04798e-05	0.0003024	1.68346
ITGAX	1.39596	7.85645	4.27711	4.07487e-05	0.000304309	1.6772
CD177	-1.92305	10.6463	-4.27455	4.11514e-05	0.000306711	1.66789
PXMP2	-0.720311	8.26736	-4.27438	4.11776e-05	0.000306806	1.66729
PCDH20	-1.1829	6.74212	-4.27335	4.13413e-05	0.000307823	1.66354
HRCT1	-0.801205	7.70395	-4.27093	4.17272e-05	0.000310188	1.65475
DSE	0.996796	7.43382	4.27069	4.17664e-05	0.000310378	1.65386
MAP4K1	0.702686	6.95235	4.27042	4.18088e-05	0.00031049	1.6529
HTR4	-0.928791	7.09445	-4.26829	4.21516e-05	0.000312729	1.64518
BATF2	0.686256	8.45042	4.26786	4.22224e-05	0.000313149	1.64359
FCRL5	1.54644	7.12328	4.26777	4.22358e-05	0.000313149	1.64329
CLDN8	-2.85901	6.23235	-4.267	4.23616e-05	0.000313877	1.64048
TOM1L1	-0.630645	7.67214	-4.26495	4.26961e-05	0.000315657	1.63304
ANKRD20A3	-0.678615	6.31401	-4.26487	4.2709e-05	0.000315657	1.63275
MME	1.4151	7.04006	4.26477	4.27249e-05	0.000315657	1.6324
SLCO1B3	2.21907	5.95488	4.26379	4.28857e-05	0.000316726	1.62884
SELL	1.81061	7.69812	4.26338	4.29536e-05	0.000317002	1.62735
SHCBP1	0.751509	6.99195	4.2628	4.30493e-05	0.000317349	1.62524
MASP1	0.839175	6.33556	4.26273	4.30615e-05	0.000317349	1.62498
CCR6	0.666136	6.19094	4.26269	4.30678e-05	0.000317349	1.62484
HLA-DOB	1.06071	6.74187	4.26233	4.3127e-05	0.000317682	1.62354
NUDT12	-0.769419	7.26105	-4.2563	4.4136e-05	0.000324588	1.60166
GVINP1	0.836799	6.68469	4.25342	4.46254e-05	0.00032734	1.59123
PPP1R18	0.697505	7.71662	4.25186	4.48916e-05	0.00032908	1.58561
ARHGAP24	0.609635	6.54158	4.25071	4.50905e-05	0.000330285	1.58143
TMEM154	1.09218	7.48641	4.24985	4.52397e-05	0.000331203	1.57831
EPC1	0.674255	9.6426	4.24899	4.53888e-05	0.000332188	1.5752
THSD7A	0.599812	6.12877	4.24615	4.58837e-05	0.000335594	1.56494
JAM3	0.705848	7.17332	4.2457	4.59632e-05	0.000335898	1.5633
FAM160A1	-0.877217	8.24161	-4.24564	4.59744e-05	0.000335898	1.56307
ALDH1A2	1.06997	6.64641	4.2439	4.62815e-05	0.000337851	1.55678
FABP1	-1.36811	9.80211	-4.2413	4.6743e-05	0.000340563	1.5474
WNT5A	1.57099	7.21757	4.24119	4.67625e-05	0.000340596	1.547
MT2A	-0.637162	12.1695	-4.23735	4.74545e-05	0.000345193	1.53311
KIAA0040	0.697988	8.45034	4.23628	4.76487e-05	0.000346273	1.52925
HOXB6	-0.630496	7.64339	-4.23521	4.7843e-05	0.000347351	1.52541
CYTIP	1.39408	7.98025	4.235	4.78814e-05	0.000347519	1.52465
GDPD2	-0.889137	6.50206	-4.23406	4.80547e-05	0.000348331	1.52123
SNORA8	0.650057	8.75776	4.23318	4.82162e-05	0.00034939	1.51806
SLC9A3	-1.45085	9.08948	-4.23175	4.84805e-05	0.000350746	1.51289
CD274	1.6432	6.82331	4.23128	4.85666e-05	0.000351257	1.51121
ARHGEF6	0.895716	7.06616	4.23078	4.86604e-05	0.000351713	1.50939
SLA	1.03288	7.06253	4.23072	4.86717e-05	0.000351713	1.50917
KLHL6	1.05652	8.0301	4.23056	4.87015e-05	0.000351785	1.50859
CD53	1.38756	9.28171	4.22991	4.88211e-05	0.000352406	1.50628
FN1	1.24045	9.4589	4.22984	4.8834e-05	0.000352406	1.50602
HGF	1.40562	6.68342	4.22957	4.88841e-05	0.000352543	1.50506
FMOD	0.783438	8.27976	4.22727	4.93153e-05	0.000354864	1.49676
PDE10A	0.731609	5.62965	4.2258	4.95928e-05	0.000356522	1.49145
DDIT4	0.996245	7.937	4.22305	5.01153e-05	0.000359709	1.48154
CD27	1.18453	8.35779	4.22014	5.06745e-05	0.000363149	1.47106
SRPX2	1.02143	7.30474	4.21921	5.08544e-05	0.000364323	1.46771
CMTM3	0.603665	7.90306	4.21889	5.0917e-05	0.000364656	1.46655
SLPI	0.970756	10.2465	4.21847	5.09988e-05	0.000365127	1.46503
GZMK	1.39206	6.37832	4.21796	5.10974e-05	0.000365603	1.4632
SLC4A4	-1.47406	9.91784	-4.21266	5.21389e-05	0.000372234	1.44414
IGKV1D-8	1.29772	7.03102	4.21114	5.2442e-05	0.000373927	1.43866
ITK	0.768879	6.83958	4.21084	5.2501e-05	0.000374231	1.4376
CA1	-2.40998	9.0942	-4.21047	5.25763e-05	0.00037465	1.43624
SELE	2.09001	6.88016	4.20697	5.32811e-05	0.000378958	1.42366
TCEA3	-1.05252	8.92778	-4.20557	5.3564e-05	0.000380732	1.41866
GBP5	1.70026	7.33357	4.20504	5.36727e-05	0.000381147	1.41674
SH3BP5	0.694025	7.06067	4.20316	5.40574e-05	0.000383519	1.40999
LNX2	-0.636759	9.37533	-4.2007	5.45655e-05	0.000386641	1.40116
SLC16A14	0.921696	7.82711	4.19499	5.57613e-05	0.000394007	1.38068
POU2AF1	1.06645	7.84387	4.19355	5.60672e-05	0.000395308	1.37551
MOP-1	0.600793	4.95189	4.19239	5.63138e-05	0.000396923	1.37137
DOCK8	1.05258	8.12951	4.19153	5.64978e-05	0.000397973	1.36828
GUCY1B3	0.953226	6.73057	4.1896	5.69132e-05	0.000400402	1.36136
NAP1L1	0.713282	8.55937	4.18913	5.70155e-05	0.000400874	1.35967
SATB2	-1.19462	10.3991	-4.18475	5.79707e-05	0.000406834	1.34398
HHEX	0.620225	7.14457	4.18179	5.86233e-05	0.000410779	1.3334
ADA	0.618451	7.46672	4.17955	5.9124e-05	0.00041365	1.32537
GREM1	1.52018	9.56982	4.17859	5.93404e-05	0.000414908	1.32192
MGAT4B	-0.613841	8.81622	-4.17812	5.94444e-05	0.000415507	1.32027
HDHD3	-0.64947	8.71301	-4.17733	5.96222e-05	0.000416525	1.31745
MST1L	-0.76378	6.97807	-4.17596	5.99343e-05	0.000418416	1.31252
KITLG	-0.600603	6.71907	-4.17134	6.09908e-05	0.000424747	1.29602
SAMSN1	1.14564	5.91597	4.17078	6.11184e-05	0.000425506	1.29405
MCTP1	1.12381	7.08228	4.16614	6.22018e-05	0.000432386	1.27746
IHH	-0.842691	8.37408	-4.1652	6.24224e-05	0.000433786	1.27412
MMP19	0.824123	6.98578	4.16481	6.25159e-05	0.000434303	1.2727
ANKRD22	0.970145	8.72458	4.16419	6.26621e-05	0.000435052	1.2705
LOC102725104	-0.676473	5.52347	-4.16219	6.31368e-05	0.000437679	1.26338
STX11	1.23154	7.97434	4.16134	6.33385e-05	0.000438676	1.26036
SPA17	-0.652704	8.4266	-4.16039	6.3568e-05	0.000439939	1.25695
TST	-0.807692	10.6853	-4.1578	6.4193e-05	0.000443377	1.24772
TM6SF2	-0.925341	7.43052	-4.15709	6.43641e-05	0.000444423	1.2452
CD180	1.57444	7.10501	4.15495	6.48872e-05	0.000447763	1.23756
FOSB	1.28285	7.64856	4.15485	6.49097e-05	0.000447782	1.23724
ENDOD1	-0.786399	8.98607	-4.15447	6.50043e-05	0.000448298	1.23586
AOAH	-0.703252	8.38034	-4.15293	6.53825e-05	0.000450597	1.23039
CES3	-1.07698	8.82129	-4.15135	6.57738e-05	0.000452781	1.22475
NFKBIA	0.696817	10.5002	4.14955	6.62208e-05	0.000455563	1.21836
BCAT2	-0.614575	7.85015	-4.14846	6.64938e-05	0.000457044	1.21448
CAPN13	-1.50996	6.95857	-4.14754	6.67244e-05	0.000458213	1.21121
ACSS2	-0.840177	9.59673	-4.14376	6.76821e-05	0.000463808	1.19776
TSPAN6	-0.916715	9.53244	-4.14088	6.84207e-05	0.000468445	1.18752
CCR4	0.69618	6.16512	4.14033	6.85617e-05	0.000469128	1.18558
SLC6A19	-1.32883	6.98812	-4.14012	6.86156e-05	0.000469356	1.18484
TIMP2	0.758499	9.31153	4.13588	6.97202e-05	0.000475479	1.16977
CD37	1.15325	8.25117	4.13314	7.04419e-05	0.000479995	1.16006
AGMO	-0.724524	4.73303	-4.13313	7.04458e-05	0.000479995	1.16
BEST2	-1.60627	7.55797	-4.1325	7.06124e-05	0.000480842	1.15778
CXCL10	2.25496	7.93196	4.13165	7.08375e-05	0.000482219	1.15477
IFI44L	1.19915	6.60846	4.129	7.15474e-05	0.000486334	1.14537
PLA1A	0.860911	6.70935	4.12887	7.15813e-05	0.000486418	1.14492
ACOT11	-0.611886	8.36688	-4.12622	7.2298e-05	0.000490116	1.13552
GLIPR1	1.37728	8.50891	4.1259	7.23862e-05	0.000490567	1.13437
DPYSL3	0.783954	7.8478	4.12524	7.25664e-05	0.000491348	1.13203
VCAN	1.36837	8.33645	4.12041	7.38942e-05	0.000499297	1.11492
CPXM1	0.793671	6.94231	4.12012	7.39736e-05	0.000499685	1.11391
CEMIP	1.87774	7.73591	4.11934	7.4191e-05	0.000501005	1.11114
AP1S3	0.659493	7.15499	4.11625	7.50551e-05	0.000506416	1.10022
ARHGAP15	1.02827	6.84517	4.11624	7.50592e-05	0.000506416	1.10017
NHSL1	-0.899898	8.90497	-4.11181	7.63142e-05	0.000514119	1.08454
SPG20	0.70887	6.25526	4.11106	7.65292e-05	0.000515109	1.08188
ZG16B	0.845086	9.89608	4.11076	7.66159e-05	0.00051554	1.08081
VIL1	-1.01288	9.90923	-4.11049	7.66951e-05	0.00051592	1.07984
KCNA3	1.18579	7.22404	4.10947	7.69885e-05	0.000517587	1.07624
OLFML2B	0.971243	6.56766	4.10682	7.77564e-05	0.000522286	1.06688
CA4	-1.31841	9.42629	-4.10646	7.786e-05	0.000522827	1.06563
LRRCC1	-0.618885	7.74671	-4.10314	7.88341e-05	0.000528454	1.0539
SP140	0.947915	6.9886	4.0994	7.99457e-05	0.000534934	1.0407
RN7SL600P	0.980414	7.23372	4.09868	8.01599e-05	0.000536052	1.03818
KCNJ2	-0.736024	8.00658	-4.09712	8.06315e-05	0.000538571	1.03265
SERPINB7	2.30821	6.40535	4.09647	8.08253e-05	0.000539548	1.03039
CR1L	0.765615	5.09394	4.09439	8.14562e-05	0.0005436	1.02306
GSTM4	-0.788187	8.90473	-4.09381	8.16358e-05	0.000544319	1.02098
FAM49A	1.0806	7.71337	4.09349	8.17334e-05	0.00054481	1.01986
CDHR1	-1.60856	7.67276	-4.09275	8.19575e-05	0.000545662	1.01728
SLC6A20	1.21355	7.90592	4.09204	8.21754e-05	0.000546953	1.01477
TNFSF13B	0.842592	7.1432	4.09168	8.22858e-05	0.000547527	1.01351
IGKV6-21	2.00677	8.39264	4.08857	8.32485e-05	0.000553035	1.00255
CES2	-0.929358	10.1205	-4.08853	8.32596e-05	0.000553035	1.00242
GHR	-1.35551	6.19724	-4.08831	8.33283e-05	0.000553329	1.00164
LOC101930405	1.17673	6.8891	4.08628	8.39633e-05	0.000557057	0.994487
MBOAT1	-0.691138	9.88117	-4.08614	8.40083e-05	0.000557193	0.993982
S100A9	1.68736	8.0778	4.08544	8.42275e-05	0.000558158	0.991526
MOGAT2	-1.2314	8.26092	-4.08521	8.43008e-05	0.00055848	0.990707
TLN2	-0.690493	7.82223	-4.08493	8.43866e-05	0.000558886	0.989748
IGKV1D-27	2.0677	9.57922	4.08351	8.48364e-05	0.000561537	0.984738
FAM65B	1.25587	7.01027	4.08246	8.51675e-05	0.0005634	0.981067
SLAMF6	1.24847	7.12052	4.08171	8.54067e-05	0.000564779	0.978424
PTP4A3	1.01218	8.37534	4.081	8.56347e-05	0.000565996	0.975912
RN7SL368P	1.45913	7.59703	4.08056	8.57748e-05	0.000566593	0.974371
LDLRAD3	0.684204	7.74041	4.08017	8.58983e-05	0.000567243	0.973016
NCKAP1L	1.0793	7.75943	4.07904	8.62611e-05	0.000569143	0.969044
IGKV2D-24	1.58423	10.2791	4.07867	8.63827e-05	0.00056978	0.967716
ST8SIA4	1.12422	6.83037	4.07737	8.6802e-05	0.000571881	0.963154
DERL3	0.934051	8.05554	4.07722	8.68485e-05	0.000572021	0.96265
TNFRSF9	1.12499	7.00228	4.07638	8.71217e-05	0.00057299	0.95969
SLC37A2	-1.28152	6.98724	-4.07473	8.76581e-05	0.000575851	0.953907
IL17RB	-0.67545	6.97379	-4.07361	8.80275e-05	0.000577994	0.949945
RND1	1.03775	7.38923	4.07143	8.87435e-05	0.000582139	0.942312
TSHZ3	0.588541	6.8463	4.071	8.88868e-05	0.000582742	0.940792
SPON2	0.784694	7.38646	4.069	8.95514e-05	0.000586592	0.933773
TXLNB	0.59147	5.49814	4.06631	9.04527e-05	0.000591813	0.924339
ENPP3	-0.956615	7.83742	-4.06414	9.11844e-05	0.000596085	0.91675
A2M	1.03966	10.4655	4.06363	9.13587e-05	0.000597052	0.914952
CSGALNACT1	0.947727	6.13651	4.06317	9.15157e-05	0.000597906	0.913334
WISP1	0.921471	7.33547	4.06128	9.21598e-05	0.000601422	0.906728
STX19	-0.917375	7.53694	-4.06012	9.25595e-05	0.000603857	0.902651
PRR5L	-0.797433	8.48729	-4.05985	9.26525e-05	0.00060429	0.901705
SERPINE1	1.6958	7.98063	4.05918	9.28846e-05	0.000605109	0.899349
ZDBF2	0.610567	5.58697	4.05738	9.35073e-05	0.000608642	0.893056
GJC1	0.765788	6.88073	4.05659	9.37808e-05	0.000610247	0.890305
MYO1A	-1.07725	9.38565	-4.05389	9.47276e-05	0.000615797	0.880844
CD3D	0.630631	7.34815	4.05261	9.518e-05	0.000617935	0.876358
STARD4	0.614363	8.0942	4.05195	9.54132e-05	0.000619273	0.874052
LUM	1.37804	9.44698	4.05032	9.59892e-05	0.0006223	0.868384
SEMA7A	0.867283	7.74538	4.04525	9.78132e-05	0.00063232	0.850659
STAP2	-0.912776	8.50666	-4.04378	9.83504e-05	0.000635069	0.845502
ANKRD20A8P	-0.637697	6.13863	-4.03899	0.000100112	0.000644426	0.828791
SYTL3	0.597432	6.38637	4.03789	0.000100521	0.000646693	0.824952
SPINK4	1.83368	9.66584	4.03464	0.000101739	0.000653787	0.813615
FCN3	1.02564	7.22501	4.03244	0.00010257	0.000658674	0.805957
TTC38	-0.586959	9.06925	-4.02922	0.0001038	0.000664136	0.794737
LRRC66	-1.00061	7.02769	-4.02756	0.000104438	0.000667013	0.788961
MOXD1	0.742813	6.06234	4.02529	0.000105318	0.000672226	0.781064
FZD5	-0.873982	9.471	-4.02517	0.000105366	0.000672342	0.780637
GJA5	0.701434	5.78813	4.02466	0.000105563	0.000673217	0.778885
IL1RAP	0.817642	6.63069	4.02373	0.000105928	0.00067517	0.77563
ZNF737	-0.6843	8.76101	-4.02347	0.00010603	0.000675493	0.774731
RASGRP3	1.17249	6.78187	4.01661	0.00010875	0.000689866	0.750887
LILRB2	1.08189	7.61139	4.00993	0.000111463	0.000704124	0.727704
PYHIN1	0.599721	6.28157	4.00818	0.000112184	0.000708032	0.721635
TNFRSF1B	0.676048	8.45562	4.00813	0.000112206	0.000708032	0.721451
CASP6	-0.652754	7.84096	-4.00276	0.000114451	0.00072082	0.702815
MX1	0.726815	7.77169	4.00274	0.000114459	0.00072082	0.702756
SYTL2	-1.05196	8.47075	-4.00267	0.000114487	0.00072082	0.702523
FLNA	0.898472	9.7095	4.00162	0.00011493	0.000722609	0.698888
FLVCR2	-0.629563	8.27536	-4.00018	0.000115541	0.000726251	0.693898
XYLB	-0.610827	7.71382	-3.99822	0.000116378	0.000730701	0.687111
CDK14	0.980355	7.21493	3.99804	0.000116456	0.00073099	0.68648
PFN2	-0.881007	7.77642	-3.99403	0.000118187	0.000740216	0.672606
OVOL1	-0.682914	8.17447	-3.98824	0.000120729	0.000754267	0.65259
NOTCH3	0.606326	7.82647	3.98482	0.000122256	0.000761708	0.640776
FUCA1	-0.759898	10.0252	-3.98317	0.000123003	0.000765526	0.635044
AKT3	1.01501	7.00913	3.98279	0.000123173	0.000766372	0.633747
PRR16	0.643688	6.1034	3.9826	0.000123257	0.000766475	0.633106
PSAT1	0.964169	6.86429	3.98005	0.000124417	0.000772418	0.624301
HNF1B	-0.830942	8.04747	-3.9784	0.000125175	0.000776914	0.618587
CLIC2	0.920174	6.40514	3.97697	0.000125831	0.000779916	0.613677
STOM	1.06615	9.61699	3.97454	0.000126958	0.000786048	0.605289
DNAJC15	-0.645043	9.36561	-3.97424	0.000127098	0.000786314	0.604252
SH3BGRL2	-0.887683	9.95282	-3.97423	0.000127105	0.000786314	0.604202
FBLN5	0.753752	7.6609	3.97243	0.000127946	0.000791087	0.598002
IFNAR2	0.81413	7.70016	3.97168	0.000128297	0.000792823	0.59543
CXCR1	1.7962	6.55712	3.97031	0.000128941	0.000795938	0.590721
GNB4	0.810389	6.98766	3.97003	0.000129076	0.000796554	0.589738
CYP2S1	-0.883694	9.19227	-3.96984	0.000129163	0.000796874	0.589105
RBMS1P1	1.2467	6.90669	3.96709	0.000130474	0.000804088	0.579614
CEP128	0.834875	6.87654	3.96578	0.000131102	0.000807298	0.575103
CCL22	0.698326	7.19204	3.96532	0.00013132	0.00080835	0.573537
ME1	1.17889	9.15559	3.96527	0.000131344	0.00080835	0.573364
CYP7B1	0.95283	7.40197	3.96415	0.000131886	0.000810145	0.5695
ASS1	0.779707	9.97254	3.96333	0.000132281	0.000812136	0.566689
GUCY1A3	1.17435	6.89242	3.96215	0.000132854	0.000815217	0.562623
PRLR	-1.22801	7.15206	-3.95968	0.000134062	0.000821075	0.554118
CAPN9	-1.03021	7.21975	-3.95783	0.000134969	0.000826183	0.547783
PDGFRA	0.89183	8.2157	3.95646	0.000135647	0.000830109	0.543075
CATSPERB	1.3002	7.20798	3.9544	0.000136673	0.000835264	0.535993
PTPN3	-0.603187	8.10036	-3.95387	0.000136938	0.000836659	0.534172
UCP2	0.792452	9.19616	3.95173	0.000138012	0.000842054	0.52683
IRF1	0.761811	9.53704	3.95128	0.000138239	0.000842569	0.525286
RNU4ATAC	0.726019	8.92983	3.95022	0.000138779	0.000845544	0.521623
IRF4	1.21156	8.33222	3.9476	0.000140112	0.000852155	0.512643
CHST15	1.02419	8.02383	3.9463	0.000140777	0.00085597	0.508195
IGKV2D-26	2.0017	9.46198	3.94487	0.000141513	0.000859522	0.503299
DMBT1	2.03264	10.5613	3.94236	0.000142816	0.000866745	0.494684
PNPLA4	-0.640131	7.96283	-3.93828	0.000144956	0.000877855	0.480715
LILRB1	0.849155	7.52774	3.93684	0.000145718	0.000881669	0.47579
DOCK2	1.04082	7.85516	3.93581	0.000146268	0.000884617	0.472256
CXCL9	1.66333	6.99555	3.93498	0.000146712	0.000886362	0.469405
HIST1H4L	0.641953	9.22344	3.93407	0.000147198	0.000889057	0.466304
NCF2	1.3931	7.43374	3.93267	0.000147952	0.000892904	0.461501
AIM2	1.1038	6.08355	3.92776	0.000150617	0.000906579	0.444735
RNU5F-1	0.827869	4.64163	3.92643	0.000151351	0.000909994	0.440173
SEC11C	0.594475	8.34025	3.9228	0.000153359	0.00091991	0.427799
ZNF385D	0.814805	6.04158	3.92255	0.000153502	0.000920528	0.42692
ANKRD20A11P	-0.674783	5.10702	-3.92124	0.000154236	0.000924683	0.422444
GPR124	0.665131	7.85017	3.92102	0.000154354	0.000925149	0.421724
HSPA13	0.792559	7.8139	3.92001	0.000154923	0.000928311	0.418272
LCP1	1.24519	9.6366	3.9196	0.000155154	0.000929453	0.41687
COL5A2	0.984651	7.10737	3.9189	0.000155549	0.000931323	0.414488
ARRDC4	-0.681124	8.9373	-3.91474	0.000157916	0.000942923	0.400305
PIWIL4	-0.581347	6.97353	-3.91373	0.0001585	0.000945504	0.396843
CD28	0.752144	6.22864	3.90876	0.000161385	0.000959943	0.379909
IGKV2D-18	1.06212	7.68384	3.90654	0.000162688	0.000966425	0.372364
TJP3	-0.685897	9.95977	-3.90641	0.000162763	0.00096662	0.37193
PDCD1LG2	1.0322	6.79052	3.90564	0.00016322	0.00096908	0.369299
SRD5A3	0.888238	9.45463	3.90348	0.000164503	0.000975929	0.361953
NRG1	1.11045	7.58894	3.90134	0.000165782	0.000982039	0.354685
TGFB2	0.795978	6.18526	3.89994	0.000166627	0.000985698	0.349914
GNG11	0.866744	7.38456	3.89585	0.000169115	0.000998598	0.336005
TNF	0.615881	6.65519	3.89366	0.000170458	0.00100574	0.328586
CCL18	1.78944	8.49901	3.89339	0.000170624	0.00100606	0.327671
CORO1A	1.01998	9.05318	3.89297	0.000170882	0.00100693	0.326254
IGHV5-78	0.838337	7.71669	3.88914	0.00017327	0.00101863	0.313232
TIFA	0.703589	6.70027	3.88673	0.000174783	0.00102646	0.305076
ERBB3	-0.888793	9.20029	-3.88472	0.000176057	0.00103264	0.298267
IL2RA	1.14066	7.20822	3.88428	0.000176335	0.00103397	0.296783
ABCC9	0.890406	5.8841	3.88294	0.000177197	0.00103795	0.292213
CASP10	0.672393	8.02954	3.8817	0.000177989	0.00104205	0.288028
KCNAB2	0.590618	7.457	3.87706	0.000180997	0.00105776	0.272308
CSF3R	1.52511	7.22905	3.87335	0.000183432	0.00107116	0.259779
PRKAR2B	0.600448	8.01909	3.86969	0.000185867	0.00108399	0.247411
SULF1	1.03881	7.54116	3.8691	0.000186268	0.00108604	0.245393
CD109	0.939893	5.96744	3.86711	0.000187603	0.00109327	0.238695
MPDZ	0.729807	6.30041	3.86694	0.00018772	0.00109367	0.23811
DQX1	-0.772282	7.405	-3.8665	0.000188017	0.00109512	0.236628
SERINC5	-0.634137	9.84478	-3.86607	0.000188306	0.00109634	0.235186
SAA2	1.13211	6.59285	3.86582	0.000188481	0.00109698	0.234316
ICAM3	0.723424	8.54249	3.86075	0.000191948	0.00111402	0.217226
TMEM119	0.629834	7.6043	3.85972	0.000192663	0.00111731	0.213744
TRABD2A	-0.773673	8.69754	-3.85904	0.000193132	0.00111974	0.211463
GSTA1	-0.795733	6.12626	-3.85854	0.00019348	0.0011209	0.209777
MXRA5P1	0.648089	6.32799	3.85819	0.000193729	0.00112177	0.208571
RNF157	-0.848893	7.92626	-3.8579	0.000193928	0.00112206	0.207611
ANGPTL4	1.05727	7.56031	3.85496	0.000195988	0.00113197	0.197704
SLC25A37	0.701499	8.48486	3.8519	0.000198158	0.00114246	0.187384
IGHV3OR15-7	1.16963	6.29592	3.85106	0.000198754	0.00114561	0.184567
PMAIP1	0.701414	7.12865	3.85074	0.000198983	0.00114635	0.183488
COL14A1	0.868463	7.4739	3.85023	0.000199352	0.00114818	0.181752
GPR155	0.630291	6.83336	3.84699	0.00020168	0.00115807	0.170871
PNP	0.580866	9.17632	3.84572	0.000202603	0.00116278	0.166592
ZNF704	-0.919344	7.13191	-3.84412	0.000203769	0.00116858	0.161217
HNF4A	-0.801372	9.74311	-3.84397	0.000203881	0.00116893	0.160701
S100A4	0.617405	7.4482	3.84122	0.000205902	0.00118022	0.151459
ENTPD8	-0.725753	8.51944	-3.83949	0.000207181	0.00118606	0.145658
SPP1	1.8221	7.55683	3.83931	0.000207313	0.00118612	0.145058
TMEM163	0.830221	6.43636	3.83851	0.00020791	0.00118873	0.142367
SPI1	0.647245	8.39125	3.83617	0.00020966	0.00119813	0.134514
LOC101927628	0.823858	9.42262	3.83513	0.000210443	0.0012014	0.131019
LTBP2	0.646761	7.44884	3.83069	0.000213821	0.00121976	0.116103
RNVU1-18	0.58248	11.8298	3.83031	0.000214111	0.0012208	0.114832
CPVL	0.609625	6.67144	3.82362	0.000219299	0.0012432	0.0924102
AGPAT9	-0.717802	8.44268	-3.82082	0.0002215	0.00125318	0.0830572
ALOX5	0.954588	8.61207	3.82048	0.000221772	0.00125441	0.0819061
AGT	0.839595	7.14457	3.82033	0.000221887	0.00125475	0.0814191
IKZF3	0.999182	7.60579	3.81683	0.000224681	0.00126928	0.0697045
GLT8D2	1.01477	7.16757	3.81404	0.000226932	0.0012804	0.0603691
CECR1	0.945745	7.83997	3.81385	0.000227086	0.00128063	0.0597349
SNORD34	0.750138	7.47076	3.81293	0.000227833	0.00128357	0.0566586
PTPRF	-0.74816	9.36638	-3.8121	0.000228507	0.00128705	0.0538906
PTPRCAP	0.654915	8.74122	3.80939	0.000230725	0.00129761	0.0448496
CD83	0.69056	7.01526	3.80932	0.000230786	0.00129764	0.0445993
KLK1	-0.851356	8.78158	-3.80863	0.000231351	0.00129996	0.042312
NCF4	0.918079	8.04513	3.80152	0.000237292	0.00132928	0.0185759
CCL4L2	1.42767	7.14783	3.79174	0.00024569	0.0013692	-0.0139725
FAM129A	0.889353	6.98272	3.79011	0.000247124	0.0013752	-0.0194167
CD86	0.941417	6.46013	3.78945	0.000247703	0.00137775	-0.0216098
TAGAP	1.24575	7.07432	3.7885	0.000248538	0.00138171	-0.0247574
IFIT3	0.830178	6.88764	3.78804	0.000248947	0.00138365	-0.0262964
FPR2	1.53833	5.98515	3.78742	0.000249491	0.00138633	-0.0283382
REG1B	3.0739	7.29596	3.78665	0.000250181	0.00138949	-0.0309233
SAA1	1.24004	6.37595	3.78178	0.000254542	0.00140991	-0.04709
CASD1	-0.608432	9.27447	-3.78054	0.000255665	0.00141475	-0.0512073
ANXA3	0.729069	9.31136	3.77941	0.000256694	0.00141941	-0.054967
CHRDL2	0.717092	6.90681	3.7786	0.000257428	0.00142174	-0.0576365
SLAMF7	1.36025	8.00167	3.77825	0.000257754	0.0014232	-0.0588225
DCN	1.29049	8.43658	3.77628	0.00025956	0.00143177	-0.0653522
MT-TY	-0.680313	9.7391	-3.77575	0.000260046	0.00143375	-0.0671002
SLC35D1	-0.631765	8.50421	-3.77502	0.000260723	0.00143714	-0.0695352
ERBB2	-0.677939	8.78979	-3.77466	0.000261052	0.0014386	-0.0707129
CKB	-1.50416	10.4449	-3.77355	0.000262078	0.00144251	-0.0743819
PCSK6	-0.64339	7.90654	-3.77327	0.000262346	0.00144271	-0.0753371
KCNJ15	1.28354	6.34768	3.77253	0.000263035	0.00144602	-0.0777911
C4BPA	1.8487	7.17148	3.77137	0.000264116	0.00145162	-0.0816281
FBXO32	-0.701384	8.45882	-3.76801	0.000267273	0.00146684	-0.0927386
PIK3R5	0.58847	7.13461	3.76335	0.000271723	0.00148874	-0.10818
LHFP	1.0358	9.03363	3.76288	0.000272176	0.00149086	-0.109738
IL18R1	0.680576	5.68275	3.76247	0.000272565	0.00149263	-0.111074
CEP170	1.02988	6.82766	3.76185	0.000273163	0.00149555	-0.113123
FAM20A	0.828316	6.21565	3.75973	0.000275221	0.00150572	-0.120139
HEPACAM2	-1.88531	8.33538	-3.75791	0.000276999	0.001514	-0.126162
ABCD2	0.633097	5.97898	3.75455	0.000280303	0.00152948	-0.137246
STC1	1.56496	6.87072	3.75431	0.00028054	0.0015303	-0.138037
SFMBT2	0.696071	7.84689	3.75427	0.000280589	0.0015303	-0.138198
SERPINB3	2.89502	6.77917	3.75387	0.000280982	0.00153171	-0.139506
GDA	-0.670543	8.23895	-3.74461	0.000290313	0.00157728	-0.170044
SELPLG	0.971998	8.26903	3.74445	0.00029048	0.0015778	-0.170579
SULT1B1	-0.838338	10.101	-3.7408	0.000294241	0.00159709	-0.182602
ANO9	-0.583705	9.42856	-3.73902	0.000296095	0.001606	-0.188472
FOXP2	-0.8639	5.65571	-3.73627	0.000298972	0.00161889	-0.197506
ACPP	0.853382	7.80595	3.73354	0.000301864	0.00163261	-0.206501
TRAF1	0.68912	6.3185	3.7331	0.000302327	0.00163472	-0.207933
TACSTD2	0.620434	6.34758	3.72475	0.000311341	0.00167708	-0.235378
OCLN	-0.975786	10.0179	-3.72418	0.000311958	0.0016796	-0.237227
CST7	0.786421	8.31248	3.72108	0.00031538	0.00169482	-0.247419
ADAMTS4	0.788092	6.58616	3.72081	0.000315677	0.0016956	-0.248296
FCGR2B	1.12839	8.14577	3.71774	0.000319096	0.00171073	-0.258357
PIK3AP1	0.600361	8.26696	3.71218	0.000325382	0.00174032	-0.276572
STAT4	0.642895	6.91839	3.7085	0.000329603	0.00175917	-0.288608
LOX	1.04245	7.27276	3.70238	0.00033674	0.00179179	-0.308607
DTHD1	0.584189	5.09118	3.6983	0.000341589	0.00181334	-0.321952
C3orf55	0.633443	5.72754	3.6947	0.000345907	0.0018309	-0.333676
PTGFR	0.653105	5.77827	3.6906	0.000350905	0.00185327	-0.347064
TMEM156	1.07595	5.96693	3.68892	0.000352966	0.00186199	-0.352528
RASSF2	1.09729	7.73073	3.68757	0.000354632	0.00186731	-0.356921
PAPPA	0.851093	6.58062	3.68724	0.000355038	0.00186901	-0.357989
TMEM71	0.96719	6.06526	3.68625	0.000356266	0.0018749	-0.361209
GALM	-0.631964	8.85174	-3.68621	0.000356322	0.0018749	-0.361357
RNY3P2	0.660805	6.27466	3.68532	0.000357433	0.00187988	-0.364262
TREM1	1.55374	6.78772	3.68456	0.000358383	0.00188269	-0.366738
LRRK2	1.18509	5.92429	3.68237	0.000361126	0.0018936	-0.373851
FPR1	1.35063	6.82116	3.68186	0.000361762	0.00189606	-0.375493
ERRFI1	0.822155	10.0612	3.67969	0.000364517	0.00190741	-0.38257
APBB1IP	0.871316	7.02504	3.67631	0.000368827	0.00192509	-0.393536
PDE3A	-0.832426	8.90079	-3.67602	0.0003692	0.00192659	-0.394478
HRASLS2	-1.07349	7.01105	-3.67406	0.000371739	0.00193762	-0.400871
DDR2	0.899407	7.50858	3.67189	0.000374546	0.00195046	-0.407888
FAM171B	0.831438	7.41333	3.67046	0.000376415	0.00195929	-0.41253
IKZF1	0.935729	7.06932	3.66998	0.000377052	0.0019617	-0.414105
KIAA0125	0.620105	7.81975	3.6661	0.000382172	0.00198522	-0.426684
HHLA2	-1.19961	10.3086	-3.66594	0.00038239	0.00198577	-0.427216
GPC6	0.699973	7.03451	3.66487	0.000383809	0.00199184	-0.43067
MMRN1	1.16079	7.0887	3.66291	0.00038643	0.00200228	-0.437015
IL1RL1	0.59036	5.56944	3.66166	0.000388113	0.00201004	-0.441066
SDK1	0.59942	7.24121	3.66086	0.000389193	0.00201472	-0.443658
CD68	0.580638	10.2538	3.6596	0.000390901	0.00202226	-0.44774
FAT4	0.704825	6.61379	3.65945	0.000391105	0.00202231	-0.448228
WDFY4	0.748152	7.1699	3.65538	0.000396666	0.00204502	-0.46139
VAV1	0.614865	7.73584	3.65199	0.000401366	0.00206409	-0.472369
LILRA1	0.857454	6.76077	3.65154	0.000401983	0.00206586	-0.473802
SDC2	0.597743	8.05332	3.65141	0.000402168	0.00206634	-0.474231
[truncated: 406 more rows]

## Sheet: C
logFC	AveExpr	t	P.Value	adj.P.Val	B
SERPINA3	1.39646	8.03914	3.39909025237144	0.00276339116629774	0.676982	-1.579
GDF15	0.748815	7.48211	3.26637239652755	0.00376078653398385	0.676982	-1.82141
ASAP1	0.666736	7.5782	3.21817640948897	0.00420373657430156	0.676982	-1.90901
SLC7A5	0.814707	7.57195	3.05000810188984	0.00618254245809048	0.676982	-2.21245
MMP7	1.57633	7.90064	2.81463259249821	0.0105172237473998	0.676982	-2.62957
PHGDH	0.742734	8.27604	2.80551136158	0.0107334781793411	0.676982	-2.64552
DUSP5	0.660465	8.60191	2.74715646292622	0.0122206185625057	0.676982	-2.74712
CDC25B	0.830177	8.90624	2.72122815682638	0.0129425007898339	0.676982	-2.79201
KRT6B	0.841291	7.07733	2.72037326933069	0.0129669783285627	0.676982	-2.79348
DUSP19	0.60516	9.05652	2.70883177490787	0.0133017702594397	0.676982	-2.81341
LRAP	0.627073	10.301	2.6702849141336	0.0144803092453532	0.676982	-2.87973
CDH3	1.08899	7.44914	2.66243903592937	0.0147320015798015	0.676982	-2.89318
GZMB	0.784939	7.27027	2.59632415396683	0.0170233241178087	0.676982	-3.00591
PRIC285	0.621587	8.28066	2.57466500680533	0.0178442837009763	0.676982	-3.04258
LPHN2	0.646869	7.53936	2.55618138126453	0.0185741775692182	0.676982	-3.07377
CXCL1	1.03284	7.85362	2.53352193557503	0.0195072244295094	0.676982	-3.11187
CD163	0.955106	7.9697	2.52762005663452	0.0197573633722955	0.676982	-3.12177
TTYH3	0.616541	8.39951	2.50039464929169	0.0209506467067457	0.676982	-3.16731
SCD	1.05419	9.711	2.45362486776559	0.0231591691249836	0.676982	-3.245
TCN1	1.18031	7.58371	2.45032671986042	0.0233228348856911	0.676982	-3.25045
LAIR2	0.638012	6.93888	2.43985649132035	0.023849572200602	0.676982	-3.26774
LYN	0.747494	8.90854	2.42510267611759	0.0246106247395773	0.676982	-3.29204
FGR	0.583652	7.33526	2.40318368121915	0.0257830600514822	0.676982	-3.32801
BGN	1.45319	9.45196	2.40131291351296	0.0258854918110919	0.676982	-3.33108
CEBPB	0.778876	9.84989	2.39705881442765	0.0261198276081332	0.676982	-3.33804
LDLR	0.600003	9.21607	2.3951142911903	0.0262275952154292	0.676982	-3.34122
PLEK	0.663594	7.66543	2.38643232361439	0.0267138092391903	0.676982	-3.3554
DDIT4	0.612062	8.34037	2.38296324864729	0.0269104130223077	0.676982	-3.36106
BASP1	0.875534	9.35693	2.366879964005	0.0278395413880965	0.676982	-3.38724
CTSL1	0.830975	9.31018	2.34195173486884	0.0293384543115889	0.676982	-3.42765
HAVCR2	0.583004	8.61057	2.33771371571118	0.0296005782953029	0.676982	-3.43449
LAMC1	0.620373	8.78256	2.33232957807301	0.0299367081957907	0.676982	-3.44318
FKBP11	0.679443	9.95762	2.32771609494192	0.030227524493973	0.676982	-3.45062
CLDN2	0.744132	7.30841	2.32363074044844	0.0304872225868813	0.676982	-3.4572
MMP12	1.10796	8.07258	2.28445886483147	0.033083731382353	0.676982	-3.52
FOXQ1	0.641997	7.15846	2.26453148468667	0.0344812284840591	0.676982	-3.55172
COL4A1	1.08834	9.7616	2.24052807741371	0.0362363630372538	0.676982	-3.58974
GBP5	0.58154	7.23557	2.2368453300787	0.0365127691246619	0.676982	-3.59556
DUOXA2	1.55468	8.72412	2.22355815215437	0.0375261323158126	0.676982	-3.61649
ANXA1	1.13606	9.8782	2.21852420358767	0.0379167174500699	0.676982	-3.6244
PFKP	0.600897	9.17088	2.21095674604329	0.038510865203655	0.676982	-3.63628
ALPL	0.888639	8.03505	2.20495508224124	0.0389881033350546	0.676982	-3.64568
PDGFRB	0.734785	8.29412	2.2024226464536	0.0391910896664777	0.676982	-3.64964
MMP3	1.60713	8.5375	2.18900506944058	0.0402827294537038	0.676982	-3.6706
OLFM4	1.71813	10.4212	2.18275503604997	0.0408006165641326	0.676982	-3.68033
REG1A	2.65875	10.2007	2.18095731166103	0.0409506965147936	0.676982	-3.68313
TMEM158	1.07184	9.07379	2.1752738437244	0.0414284800232367	0.676982	-3.69197
ITGA5	0.658379	7.68095	2.17521629342358	0.0414333438309114	0.676982	-3.69206
REG1B	2.5973	9.8861	2.16454266250852	0.0423444413191281	0.676982	-3.70862
SLC16A3	0.60919	9.76424	2.15698653570627	0.0430003881909098	0.676982	-3.72031
RAC2	0.691734	10.1686	2.12884475061515	0.0455252406062151	0.676982	-3.76366
LCP1	0.818176	9.87219	2.11315782169655	0.0469901820216282	0.676982	-3.78768
TIMP1	0.99701	11.2596	2.10363170339127	0.047900436944151	0.676982	-3.80222

## Sheet: D
ID	Term	Ontology Source	Term PValue	Term PValue Corrected with Bonferroni step down	% Associated Genes	Nr. Genes
GO:0072329	monocarboxylic acid catabolic process	GO_BiologicalProcess	4.47e-07	6.62e-05	7.69	11
GO:1990169	stress response to copper ion	GO_BiologicalProcess	5.55e-07	8.11e-05	31.25	5
GO:0010273	detoxification of copper ion	GO_BiologicalProcess	5.55e-07	8.11e-05	31.25	5
GO:0019395	fatty acid oxidation	GO_BiologicalProcess	5.7e-07	8.26e-05	8.55	10
GO:0034440	lipid oxidation	GO_BiologicalProcess	8.4e-07	0.000121012	8.2	10
GO:0006631	fatty acid metabolic process	GO_BiologicalProcess	8.52e-07	0.000121786	4.26	18
GO:0061687	detoxification of inorganic compound	GO_BiologicalProcess	1.44e-06	0.000204414	26.32	5
GO:0097501	stress response to metal ion	GO_BiologicalProcess	1.9e-06	0.000268261	25	5
GO:0009636	response to toxic substance	GO_BiologicalProcess	2.12e-06	0.000296814	5.04	14
GO:0016042	lipid catabolic process	GO_BiologicalProcess	2.68e-06	0.000372679	4.35	16
GO:0006635	fatty acid beta-oxidation	GO_BiologicalProcess	2.91e-06	0.000401792	9.76	8
GO:0016054	organic acid catabolic process	GO_BiologicalProcess	3.07e-06	0.000421118	4.88	14
GO:0006882	cellular zinc ion homeostasis	GO_BiologicalProcess	3.58e-06	0.000486846	15.38	6
GO:0009062	fatty acid catabolic process	GO_BiologicalProcess	4.74e-06	0.000639311	7.76	9
GO:0055069	zinc ion homeostasis	GO_BiologicalProcess	4.85e-06	0.000649295	14.63	6
GO:0046395	carboxylic acid catabolic process	GO_BiologicalProcess	8.02e-06	0.00104246	4.81	13
GO:0098754	detoxification	GO_BiologicalProcess	9.19e-06	0.00118612	6.29	10
GO:0071294	cellular response to zinc ion	GO_BiologicalProcess	9.32e-06	0.00119234	18.52	5
GO:0071280	cellular response to copper ion	GO_BiologicalProcess	1.35e-05	0.00170994	17.24	5
GO:0030258	lipid modification	GO_BiologicalProcess	1.91e-05	0.00240917	4.44	13
GO:0044242	cellular lipid catabolic process	GO_BiologicalProcess	1.93e-05	0.0024103	4.78	12
GO:0006599	phosphagen metabolic process	GO_BiologicalProcess	2.42e-05	0.00300494	50	3
GO:0006603	phosphocreatine metabolic process	GO_BiologicalProcess	2.42e-05	0.00300494	50	3
GO:0042396	phosphagen biosynthetic process	GO_BiologicalProcess	2.42e-05	0.00300494	50	3
GO:0046314	phosphocreatine biosynthetic process	GO_BiologicalProcess	2.42e-05	0.00300494	50	3
GO:0004111	creatine kinase activity	GO_BiologicalProcess	4.21e-05	0.00517464	42.86	3
GO:0030249	guanylate cyclase regulator activity	GO_BiologicalProcess	4.21e-05	0.00517464	42.86	3
GO:0035774	positive regulation of insulin secretion involved in cellular response to glucose stimulus	GO_BiologicalProcess	6.77e-05	0.00819648	12.5	5
GO:0046916	cellular transition metal ion homeostasis	GO_BiologicalProcess	7.23e-05	0.00867926	6.3	8
GO:0010043	response to zinc ion	GO_BiologicalProcess	7.82e-05	0.00930996	9.09	6
GO:0010851	cyclase regulator activity	GO_BiologicalProcess	9.94e-05	0.0117252	33.33	3
GO:0061178	regulation of insulin secretion involved in cellular response to glucose stimulus	GO_BiologicalProcess	0.000100486	0.0117569	8.7	6
GO:0015701	bicarbonate transport	GO_BiologicalProcess	0.000107951	0.0125224	11.36	5
GO:0071276	cellular response to cadmium ion	GO_BiologicalProcess	0.000107951	0.0125224	11.36	5
GO:0046688	response to copper ion	GO_BiologicalProcess	0.000120387	0.0138445	11.11	5
GO:0055076	transition metal ion homeostasis	GO_BiologicalProcess	0.000209556	0.0230512	5.41	8
GO:0035773	insulin secretion involved in cellular response to glucose stimulus	GO_BiologicalProcess	0.000213066	0.0232242	7.59	6
GO:0071333	cellular response to glucose stimulus	GO_BiologicalProcess	0.000240303	0.0259527	5.3	8
GO:0071331	cellular response to hexose stimulus	GO_BiologicalProcess	0.000262783	0.027855	5.23	8
GO:0071326	cellular response to monosaccharide stimulus	GO_BiologicalProcess	0.000274652	0.0288384	5.19	8
GO:0032528	microvillus organization	GO_BiologicalProcess	0.000330742	0.0340664	12.9	4
GO:0015698	inorganic anion transport	GO_BiologicalProcess	0.000347558	0.0354509	4.48	9
GO:0071322	cellular response to carbohydrate stimulus	GO_BiologicalProcess	0.000419313	0.0423507	4.88	8
GO:0070373	negative regulation of ERK1 and ERK2 cascade	GO_BiologicalProcess	0.0475593	0.0475593	4	3
GO:0019210	kinase inhibitor activity	GO_BiologicalProcess	0.0475593	0.0475593	4	3
GO:0099518	vesicle cytoskeletal trafficking	GO_BiologicalProcess	0.0475593	0.0475593	4	3
GO:0033559	unsaturated fatty acid metabolic process	GO_BiologicalProcess	0.000486223	0.0476499	5.47	7
GO:0005903	brush border	GO_CellularComponent	5.45e-06	0.000725051	7.63	9
GO:0005902	microvillus	GO_CellularComponent	6.93e-06	0.000908272	8.7	8
GO:0016616	oxidoreductase activity, acting on the CH-OH group of donors, NAD or NADP as acceptor	GO_MolecularFunction	2.5e-07	3.75e-05	8.15	11
GO:0016614	oxidoreductase activity, acting on CH-OH group of donors	GO_MolecularFunction	4.8e-07	7.05e-05	7.64	11
GO:0003985	acetyl-CoA C-acetyltransferase activity	GO_MolecularFunction	4.21e-05	0.00517464	42.86	3
GO:0016775	phosphotransferase activity, nitrogenous group as acceptor	GO_MolecularFunction	6.68e-05	0.00814666	37.5	3
GO:0016453	C-acetyltransferase activity	GO_MolecularFunction	6.68e-05	0.00814666	37.5	3
GO:0003988	acetyl-CoA C-acyltransferase activity	GO_MolecularFunction	0.000192088	0.0213218	27.27	3
KEGG:04978	Mineral absorption	KEGG_13.05.2021	2.56e-07	3.82e-05	13.33	8
KEGG:00071	Fatty acid degradation	KEGG_13.05.2021	6.45e-06	0.000851755	13.95	6
KEGG:00920	Sulfur metabolism	KEGG_13.05.2021	0.000140821	0.0160536	30	3
KEGG:00280	Valine, leucine and isoleucine degradation	KEGG_13.05.2021	0.000164352	0.0185718	10.42	5
KEGG:03320	PPAR signaling pathway	KEGG_13.05.2021	0.000172132	0.0192787	7.89	6
KEGG:04146	Peroxisome	KEGG_13.05.2021	0.000261311	0.0279603	7.32	6
KEGG:00020	Citrate cycle (TCA cycle)	KEGG_13.05.2021	0.000290508	0.0302128	13.33	4
KEGG:04976	Bile secretion	KEGG_13.05.2021	0.000432614	0.0432614	6.67	6
KEGG:00640	Propanoate metabolism	KEGG_13.05.2021	0.000475293	0.047054	11.76	4

## Sheet: E
ID	Term	Ontology Source	Term PValue	Term PValue Corrected with Bonferroni step down	% Associated Genes	Nr. Genes
GO:0030198	extracellular matrix organization	GO_BiologicalProcess	1.15e-20	2.37e-18	6.52	29
GO:0043062	extracellular structure organization	GO_BiologicalProcess	1.23e-20	2.51e-18	6.5	29
GO:0045229	external encapsulating structure organization	GO_BiologicalProcess	1.39e-20	2.82e-18	6.47	29
GO:0001568	blood vessel development	GO_BiologicalProcess	1.11e-18	2.24e-16	4.55	33
GO:0001944	vasculature development	GO_BiologicalProcess	4.21e-18	8.45e-16	4.35	33
GO:0001525	angiogenesis	GO_BiologicalProcess	3.31e-17	6.61e-15	5.12	28
GO:0048514	blood vessel morphogenesis	GO_BiologicalProcess	2.48e-16	4.91e-14	4.5	29
GO:0030199	collagen fibril organization	GO_BiologicalProcess	4.61e-13	9.03e-11	11.82	13
GO:2000147	positive regulation of cell motility	GO_BiologicalProcess	5.94e-13	1.16e-10	4.2	24
GO:0051272	positive regulation of cellular component movement	GO_BiologicalProcess	1.03e-12	1.99e-10	4.09	24
GO:0040017	positive regulation of locomotion	GO_BiologicalProcess	1.07e-12	2.06e-10	4.08	24
GO:0030335	positive regulation of cell migration	GO_BiologicalProcess	1.45e-11	2.76e-09	4.01	22
GO:0001667	ameboidal-type cell migration	GO_BiologicalProcess	8.42e-10	1.57e-07	4.11	18
GO:0045765	regulation of angiogenesis	GO_BiologicalProcess	1.41e-09	2.62e-07	5.07	15
GO:1901342	regulation of vasculature development	GO_BiologicalProcess	1.69e-09	3.13e-07	5	15
GO:0007492	endoderm development	GO_BiologicalProcess	4.01e-09	7.34e-07	10.98	9
GO:0031589	cell-substrate adhesion	GO_BiologicalProcess	5.76e-09	1.05e-06	4.2	16
GO:0035987	endodermal cell differentiation	GO_BiologicalProcess	1.61e-08	2.88e-06	15.91	7
GO:0010631	epithelial cell migration	GO_BiologicalProcess	2.3e-08	4.1e-06	4.5	14
GO:0090132	epithelium migration	GO_BiologicalProcess	2.6e-08	4.57e-06	4.46	14
GO:0032964	collagen biosynthetic process	GO_BiologicalProcess	4.06e-08	7.1e-06	14	7
GO:0043542	endothelial cell migration	GO_BiologicalProcess	5.39e-08	9.33e-06	5.17	12
GO:0001706	endoderm formation	GO_BiologicalProcess	7.04e-08	1.21e-05	12.96	7
GO:0040013	negative regulation of locomotion	GO_BiologicalProcess	2.73e-07	4.61e-05	4.02	13
GO:0061448	connective tissue development	GO_BiologicalProcess	2.91e-07	4.89e-05	4.43	12
GO:0050764	regulation of phagocytosis	GO_BiologicalProcess	3.64e-07	6.08e-05	8	8
GO:0001101	response to acid chemical	GO_BiologicalProcess	6.91e-07	0.000114717	6.08	9
GO:0007162	negative regulation of cell adhesion	GO_BiologicalProcess	7.99e-07	0.000131818	4.03	12
GO:0051216	cartilage development	GO_BiologicalProcess	1.19e-06	0.000194427	4.9	10
GO:0001704	formation of primary germ layer	GO_BiologicalProcess	1.77e-06	0.000288697	6.5	8
GO:0043491	protein kinase B signaling	GO_BiologicalProcess	1.88e-06	0.000304532	4.12	11
GO:0071559	response to transforming growth factor beta	GO_BiologicalProcess	2.17e-06	0.000349551	4.06	11
GO:0010810	regulation of cell-substrate adhesion	GO_BiologicalProcess	3.62e-06	0.000579677	4.33	10
GO:0010632	regulation of epithelial cell migration	GO_BiologicalProcess	4.72e-06	0.000750778	4.2	10
GO:0016525	negative regulation of angiogenesis	GO_BiologicalProcess	4.93e-06	0.000773402	7	7
GO:0002064	epithelial cell development	GO_BiologicalProcess	4.9e-06	0.000774253	4.18	10
GO:2000181	negative regulation of blood vessel morphogenesis	GO_BiologicalProcess	5.26e-06	0.000821135	6.93	7
GO:1901343	negative regulation of vasculature development	GO_BiologicalProcess	5.62e-06	0.000865524	6.86	7
GO:0051896	regulation of protein kinase B signaling	GO_BiologicalProcess	5.67e-06	0.000868118	4.12	10
GO:0050766	positive regulation of phagocytosis	GO_BiologicalProcess	6.84e-06	0.00103308	8.7	6
GO:0007369	gastrulation	GO_BiologicalProcess	7.03e-06	0.00105451	4.59	9
GO:0071230	cellular response to amino acid stimulus	GO_BiologicalProcess	8.08e-06	0.00120462	8.45	6
GO:0034341	response to interferon-gamma	GO_BiologicalProcess	1.18e-05	0.00172064	4.31	9
GO:0001885	endothelial cell development	GO_BiologicalProcess	1.2e-05	0.00174115	7.89	6
GO:0046596	regulation of viral entry into host cell	GO_BiologicalProcess	1.23e-05	0.00177416	11.11	5
GO:0008360	regulation of cell shape	GO_BiologicalProcess	1.43e-05	0.00204107	4.91	8
GO:0050866	negative regulation of cell activation	GO_BiologicalProcess	1.48e-05	0.00209775	4.19	9
GO:0071229	cellular response to acid chemical	GO_BiologicalProcess	1.61e-05	0.00227688	7.5	6
GO:0045446	endothelial cell differentiation	GO_BiologicalProcess	1.64e-05	0.00229396	5.83	7
GO:0043200	response to amino acid	GO_BiologicalProcess	2.25e-05	0.00308192	5.56	7
GO:0052372	modulation by symbiont of entry into host	GO_BiologicalProcess	2.52e-05	0.00340783	9.62	5
GO:0010594	regulation of endothelial cell migration	GO_BiologicalProcess	2.59e-05	0.00346756	4.52	8
GO:0045598	regulation of fat cell differentiation	GO_BiologicalProcess	3.04e-05	0.00403973	5.3	7
GO:0043277	apoptotic cell clearance	GO_BiologicalProcess	3.32e-05	0.00438895	9.09	5
GO:0003158	endothelium development	GO_BiologicalProcess	3.51e-05	0.00459691	5.19	7
GO:0022612	gland morphogenesis	GO_BiologicalProcess	3.51e-05	0.00459691	5.19	7
GO:0061028	establishment of endothelial barrier	GO_BiologicalProcess	3.63e-05	0.00472087	8.93	5
GO:0051897	positive regulation of protein kinase B signaling	GO_BiologicalProcess	4.29e-05	0.00553424	4.21	8
GO:0060907	positive regulation of macrophage cytokine production	GO_BiologicalProcess	4.66e-05	0.0059656	27.27	3
GO:0002011	morphogenesis of an epithelial sheet	GO_BiologicalProcess	5.08e-05	0.00645429	8.33	5
GO:0038063	collagen-activated tyrosine kinase receptor signaling pathway	GO_BiologicalProcess	6.18e-05	0.00772965	25	3
GO:0071803	positive regulation of podosome assembly	GO_BiologicalProcess	8e-05	0.00991933	23.08	3
GO:0070486	leukocyte aggregation	GO_BiologicalProcess	8e-05	0.00991933	23.08	3
GO:0042116	macrophage activation	GO_BiologicalProcess	8.38e-05	0.0103071	5.61	6
GO:0044319	wound healing, spreading of cells	GO_BiologicalProcess	8.57e-05	0.010461	11.43	4
GO:0090505	epiboly involved in wound healing	GO_BiologicalProcess	8.57e-05	0.010461	11.43	4
GO:0032835	glomerulus development	GO_BiologicalProcess	8.66e-05	0.0104741	7.46	5
GO:0045600	positive regulation of fat cell differentiation	GO_BiologicalProcess	8.66e-05	0.0104741	7.46	5
GO:1901890	positive regulation of cell junction assembly	GO_BiologicalProcess	8.82e-05	0.0105893	5.56	6
GO:0090504	epiboly	GO_BiologicalProcess	9.6e-05	0.0114199	11.11	4
GO:0007044	cell-substrate junction assembly	GO_BiologicalProcess	0.000102721	0.012121	5.41	6
GO:0010634	positive regulation of epithelial cell migration	GO_BiologicalProcess	0.000107011	0.0124132	4.35	7
GO:0032757	positive regulation of interleukin-8 production	GO_BiologicalProcess	0.000106754	0.0124903	7.14	5
GO:0097530	granulocyte migration	GO_BiologicalProcess	0.000111227	0.0127911	4.32	7
GO:0045834	positive regulation of lipid metabolic process	GO_BiologicalProcess	0.000120065	0.0135674	4.27	7
GO:0048754	branching morphogenesis of an epithelial tube	GO_BiologicalProcess	0.000120065	0.0135674	4.27	7
GO:0035633	maintenance of blood-brain barrier	GO_BiologicalProcess	0.000119016	0.0135678	10.53	4
GO:1904427	positive regulation of calcium ion transmembrane transport	GO_BiologicalProcess	0.01397	0.01397	4	3
GO:0003407	neural retina development	GO_BiologicalProcess	0.01397	0.01397	4	3
GO:0030032	lamellipodium assembly	GO_BiologicalProcess	0.01397	0.01397	4	3
GO:0032722	positive regulation of chemokine production	GO_BiologicalProcess	0.01397	0.01397	4	3
GO:0032526	response to retinoic acid	GO_BiologicalProcess	0.000124894	0.0139882	5.22	6
GO:0038065	collagen-activated signaling pathway	GO_BiologicalProcess	0.000126021	0.0139883	20	3
GO:0032965	regulation of collagen biosynthetic process	GO_BiologicalProcess	0.000131932	0.0145126	10.26	4
GO:0150115	cell-substrate junction organization	GO_BiologicalProcess	0.00013732	0.0149679	5.13	6
GO:0045123	cellular extravasation	GO_BiologicalProcess	0.000148221	0.0160078	6.67	5
GO:0071801	regulation of podosome assembly	GO_BiologicalProcess	0.000154343	0.0165148	18.75	3
GO:0010934	macrophage cytokine production	GO_BiologicalProcess	0.000154343	0.0165148	18.75	3
GO:0010935	regulation of macrophage cytokine production	GO_BiologicalProcess	0.000154343	0.0165148	18.75	3
GO:0007229	integrin-mediated signaling pathway	GO_BiologicalProcess	0.000165105	0.0173361	4.96	6
GO:1904018	positive regulation of vasculature development	GO_BiologicalProcess	0.000173239	0.0180169	4.02	7
GO:0045766	positive regulation of angiogenesis	GO_BiologicalProcess	0.000173239	0.0180169	4.02	7
GO:1904862	inhibitory synapse assembly	GO_BiologicalProcess	0.0001865	0.0192095	17.65	3
GO:0035313	wound healing, spreading of epidermal cells	GO_BiologicalProcess	0.000222705	0.0222705	16.67	3
GO:0043903	regulation of biological process involved in symbiotic interaction	GO_BiologicalProcess	0.00025268	0.0245099	5.95	5
GO:0061383	trabecula morphogenesis	GO_BiologicalProcess	0.000252437	0.0247388	8.7	4
GO:0043300	regulation of leukocyte degranulation	GO_BiologicalProcess	0.000252437	0.0247388	8.7	4
GO:0010712	regulation of collagen metabolic process	GO_BiologicalProcess	0.000252437	0.0247388	8.7	4
GO:1990266	neutrophil migration	GO_BiologicalProcess	0.000264904	0.0254308	4.55	6
GO:0014909	smooth muscle cell migration	GO_BiologicalProcess	0.0134759	0.0269518	4.05	3
GO:0033627	cell adhesion mediated by integrin	GO_BiologicalProcess	0.0134759	0.0269518	4.05	3
GO:0001727	lipid kinase activity	GO_BiologicalProcess	0.0134759	0.0269518	4.05	3
GO:0071800	podosome assembly	GO_BiologicalProcess	0.000308098	0.0289612	15	3
GO:0071621	granulocyte chemotaxis	GO_BiologicalProcess	0.000323594	0.0300942	4.38	6
GO:0042476	odontogenesis	GO_BiologicalProcess	0.000349737	0.0318261	4.32	6
GO:0048661	positive regulation of smooth muscle cell proliferation	GO_BiologicalProcess	0.000366673	0.0330005	5.49	5
GO:0022617	extracellular matrix disassembly	GO_BiologicalProcess	0.000366673	0.0330005	5.49	5
GO:0060443	mammary gland morphogenesis	GO_BiologicalProcess	0.000376713	0.0335275	7.84	4
GO:0032637	interleukin-8 production	GO_BiologicalProcess	0.000385683	0.0339401	5.43	5
GO:0032677	regulation of interleukin-8 production	GO_BiologicalProcess	0.000385683	0.0339401	5.43	5
GO:2000351	regulation of endothelial cell apoptotic process	GO_BiologicalProcess	0.000406002	0.0349162	7.69	4
GO:0046597	negative regulation of viral entry into host cell	GO_BiologicalProcess	0.000412144	0.0350323	13.64	3
GO:0061081	positive regulation of myeloid leukocyte cytokine production involved in immune response	GO_BiologicalProcess	0.000412144	0.0350323	13.64	3
GO:1904035	regulation of epithelial cell apoptotic process	GO_BiologicalProcess	0.00040543	0.0352724	5.38	5
GO:0006692	prostanoid metabolic process	GO_BiologicalProcess	0.000436882	0.0366981	7.55	4
GO:0006693	prostaglandin metabolic process	GO_BiologicalProcess	0.000436882	0.0366981	7.55	4
GO:0048041	focal adhesion assembly	GO_BiologicalProcess	0.000469265	0.038949	5.21	5
GO:0045576	mast cell activation	GO_BiologicalProcess	0.012992	0.0389761	4.11	3
GO:0010977	negative regulation of neuron projection development	GO_BiologicalProcess	0.000506264	0.0410074	4.03	6
GO:0007566	embryo implantation	GO_BiologicalProcess	0.000503609	0.041296	7.27	4
GO:1902743	regulation of lamellipodium organization	GO_BiologicalProcess	0.000539555	0.0426249	7.14	4
GO:0035089	establishment of apical/basal cell polarity	GO_BiologicalProcess	0.000536398	0.0429118	12.5	3
GO:0072577	endothelial cell apoptotic process	GO_BiologicalProcess	0.000577288	0.0450285	7.02	4
GO:0014068	positive regulation of phosphatidylinositol 3-kinase signaling	GO_BiologicalProcess	0.000619334	0.04645	4.9	5
GO:1903901	negative regulation of viral life cycle	GO_BiologicalProcess	0.000606568	0.0467057	12	3
GO:0060350	endochondral bone morphogenesis	GO_BiologicalProcess	0.000616858	0.0468812	6.9	4
GO:0031012	extracellular matrix	GO_CellularComponent	2.57e-24	5.34e-22	5.95	36
GO:0030312	external encapsulating structure	GO_CellularComponent	2.72e-24	5.62e-22	5.94	36
GO:0062023	collagen-containing extracellular matrix	GO_CellularComponent	1.27e-22	2.62e-20	6.8	31
GO:0005788	endoplasmic reticulum lumen	GO_CellularComponent	4.73e-17	9.41e-15	6.91	23
GO:0098644	complex of collagen trimers	GO_CellularComponent	6.2e-13	1.2e-10	38.1	8
GO:0098643	banded collagen fibril	GO_CellularComponent	9.54e-09	1.73e-06	41.67	5
GO:0005583	fibrillar collagen trimer	GO_CellularComponent	9.54e-09	1.73e-06	41.67	5
GO:0005604	basement membrane	GO_CellularComponent	2.57e-08	4.54e-06	8.91	9
GO:0097517	contractile actin filament bundle	GO_CellularComponent	1.03e-05	0.0015122	8.11	6
GO:0001725	stress fiber	GO_CellularComponent	1.03e-05	0.0015122	8.11	6
GO:0032432	actin filament bundle	GO_CellularComponent	1.86e-05	0.00258708	7.32	6
GO:0042641	actomyosin	GO_CellularComponent	2e-05	0.00275351	7.23	6
GO:0098651	basement membrane collagen trimer	GO_CellularComponent	2.4e-05	0.00325872	33.33	3
GO:0043202	lysosomal lumen	GO_CellularComponent	8.38e-05	0.0103071	5.61	6
GO:0005884	actin filament	GO_CellularComponent	0.000205893	0.0207952	4.76	6
GO:0030020	extracellular matrix structural constituent conferring tensile strength	GO_MolecularFunction	1.21e-13	2.39e-11	24.39	10
GO:0005518	collagen binding	GO_MolecularFunction	5.54e-10	1.04e-07	13.64	9
GO:0005178	integrin binding	GO_MolecularFunction	9.33e-08	1.59e-05	6.45	10
GO:0019838	growth factor binding	GO_MolecularFunction	5.46e-06	0.000846859	5.59	8
GO:0005539	glycosaminoglycan binding	GO_MolecularFunction	6.55e-06	0.000995797	4.05	10
GO:0030971	receptor tyrosine kinase binding	GO_MolecularFunction	0.01397	0.01397	4	3
GO:0019955	cytokine binding	GO_MolecularFunction	0.000506264	0.0410074	4.03	6
KEGG:04510	Focal adhesion	KEGG_13.05.2021	8.05e-11	1.53e-08	6.97	14
KEGG:04512	ECM-receptor interaction	KEGG_13.05.2021	3.75e-10	7.08e-08	11.36	10
KEGG:04974	Protein digestion and absorption	KEGG_13.05.2021	1.8e-09	3.31e-07	9.71	10
KEGG:04151	PI3K-Akt signaling pathway	KEGG_13.05.2021	1.58e-08	2.84e-06	4.24	15
KEGG:05165	Human papillomavirus infection	KEGG_13.05.2021	5.01e-08	8.72e-06	4.23	14
KEGG:04670	Leukocyte transendothelial migration	KEGG_13.05.2021	7.4e-08	1.27e-05	7.89	9
KEGG:05146	Amoebiasis	KEGG_13.05.2021	5.62e-06	0.000865524	6.86	7
KEGG:05205	Proteoglycans in cancer	KEGG_13.05.2021	1.01e-05	0.00149393	4.39	9
KEGG:04933	AGE-RAGE signaling pathway in diabetic complications	KEGG_13.05.2021	5.74e-05	0.00723559	6	6
KEGG:05133	Pertussis	KEGG_13.05.2021	0.000157813	0.0167282	6.58	5
KEGG:04611	Platelet activation	KEGG_13.05.2021	0.000188722	0.0192496	4.84	6
KEGG:04926	Relaxin signaling pathway	KEGG_13.05.2021	0.000233936	0.0231597	4.65	6
KEGG:04610	Complement and coagulation cascades	KEGG_13.05.2021	0.000267043	0.0253691	5.88	5
KEGG:05144	Malaria	KEGG_13.05.2021	0.000348966	0.0321049	8	4
KEGG:04514	Cell adhesion molecules	KEGG_13.05.2021	0.000506264	0.0410074	4.03	6

## Sheet: F
ID	Term	Ontology Source	Term PValue	Term PValue Corrected with Bonferroni step down	% Associated Genes	Nr. Genes
GO:0022617	extracellular matrix disassembly	GO_BiologicalProcess	2.27e-07	2.95e-06	5.49	5
GO:0071492	cellular response to UV-A	GO_BiologicalProcess	8.61e-07	1.03e-05	23.08	3
GO:0070141	response to UV-A	GO_BiologicalProcess	1.68e-06	1.85e-05	18.75	3
GO:0032753	positive regulation of interleukin-4 production	GO_BiologicalProcess	6.84e-06	6.84e-05	12	3
GO:0032633	interleukin-4 production	GO_BiologicalProcess	1.47e-05	0.000131877	9.38	3
GO:0032673	regulation of interleukin-4 production	GO_BiologicalProcess	1.47e-05	0.000131877	9.38	3
GO:0090504	epiboly	GO_BiologicalProcess	2.1e-05	0.000147056	8.33	3
GO:0044319	wound healing, spreading of cells	GO_BiologicalProcess	1.93e-05	0.000154215	8.57	3
GO:0090505	epiboly involved in wound healing	GO_BiologicalProcess	1.93e-05	0.000154215	8.57	3
GO:0032835	glomerulus development	GO_BiologicalProcess	0.0001366	0.0002732	4.48	3
GO:0006953	acute-phase response	GO_BiologicalProcess	0.000119165	0.000357495	4.69	3
GO:0030865	cortical cytoskeleton organization	GO_BiologicalProcess	0.000113694	0.000454776	4.76	3
GO:0002011	morphogenesis of an epithelial sheet	GO_BiologicalProcess	9.83e-05	0.000589625	5	3
GO:0035580	specific granule lumen	GO_CellularComponent	0.000149099	0.000149099	4.35	3
GO:1904724	tertiary granule lumen	GO_CellularComponent	0.00010839	0.000541948	4.84	3
